# Supplementary material for: Pan-cancer analyses of senescence-related genes in extracellular matrix characterization in cancer
Source: Discov Oncol. 2023 Nov 20;14:208. doi: 10.1007/s12672-023-00828-7 (PMC10660488; doi:10.1007/s12672-023-00828-7)
Supplement: Supplementary file 9 — Supplementary file9 (XLSX 924 KB) [file 12672_2023_828_MOESM9_ESM.xlsx]

## Sheet: SheetName
Table S4 The correlation between gene expression and immune infiltration in 33 cancers
cancertype	symbol	cell_type	cor	p_value	fdr	entrez
ACC	FGF2	Bcell	-0.259389	0.0209763	0.0858117	2247
ACC	FGF2	CD4_T	0.14236	0.210738	0.605446	2247
ACC	FGF2	CD4_naive	-0.123155	0.279565	0.522146	2247
ACC	FGF2	CD8_T	0.287528	0.0101883	0.0437063	2247
ACC	FGF2	CD8_naive	-0.0710677	0.53369	0.755136	2247
ACC	FGF2	Central_memory	0.0277343	0.808295	0.918078	2247
ACC	FGF2	Cytotoxic	0.249254	0.0267464	0.0840375	2247
ACC	FGF2	DC	-0.175641	0.121547	0.4165	2247
ACC	FGF2	Effector_memory	0.172217	0.129099	0.518878	2247
ACC	FGF2	Exhausted	0.267849	0.0170083	0.10795	2247
ACC	FGF2	Gamma_delta	0.210773	0.0622464	0.213035	2247
ACC	FGF2	InfiltrationScore	0.0160315	0.888479	0.941365	2247
ACC	FGF2	MAIT	0.244624	0.0297999	0.109089	2247
ACC	FGF2	Macrophage	-0.0163711	0.886132	0.952026	2247
ACC	FGF2	Monocyte	-0.178104	0.116327	0.546917	2247
ACC	FGF2	NK	0.20782	0.066088	0.180139	2247
ACC	FGF2	NKT	0.221018	0.0502985	0.174084	2247
ACC	FGF2	Neutrophil	-0.317196	0.00439524	0.0200023	2247
ACC	FGF2	Tfh	0.305816	0.00612858	0.0357212	2247
ACC	FGF2	Th1	0.366137	0.000905158	0.00704533	2247
ACC	FGF2	Th17	-0.0442729	0.698442	0.844251	2247
ACC	FGF2	Th2	0.226483	0.044739	0.137452	2247
ACC	FGF2	Tr1	-0.147704	0.193931	0.768609	2247
ACC	FGF2	iTreg	0.24427	0.0300453	0.119362	2247
ACC	FGF2	nTreg	0.222936	0.0482859	0.212137	2247
ACC	ICAM1	Bcell	-0.496938	3.18659e-06	9.4965e-05	3383
ACC	ICAM1	CD4_T	0.216346	0.0554903	0.358083	3383
ACC	ICAM1	CD4_naive	-0.560866	7.61573e-08	7.23641e-06	3383
ACC	ICAM1	CD8_T	0.463304	1.7104e-05	0.000310889	3383
ACC	ICAM1	CD8_naive	-0.409473	0.000178838	0.00751617	3383
ACC	ICAM1	Central_memory	-0.193231	0.0879671	0.291726	3383
ACC	ICAM1	Cytotoxic	0.484986	5.90929e-06	9.254e-05	3383
ACC	ICAM1	DC	0.310759	0.00531277	0.085385	3383
ACC	ICAM1	Effector_memory	0.351984	0.00146722	0.0530491	3383
ACC	ICAM1	Exhausted	0.472917	1.0773e-05	0.000418758	3383
ACC	ICAM1	Gamma_delta	-0.1677	0.139601	0.345514	3383
ACC	ICAM1	InfiltrationScore	0.467882	1.3748e-05	0.000359108	3383
ACC	ICAM1	MAIT	0.271415	0.0155398	0.0689495	3383
ACC	ICAM1	Macrophage	0.458634	2.1305e-05	0.000777465	3383
ACC	ICAM1	Monocyte	-0.13909	0.221518	0.654388	3383
ACC	ICAM1	NK	0.360844	0.00108718	0.00957592	3383
ACC	ICAM1	NKT	0.317116	0.00440568	0.0332906	3383
ACC	ICAM1	Neutrophil	-0.389748	0.000384595	0.00291394	3383
ACC	ICAM1	Tfh	0.56503	5.80751e-08	3.04642e-06	3383
ACC	ICAM1	Th1	0.55108	1.4196e-07	4.91586e-06	3383
ACC	ICAM1	Th17	-0.348864	0.00162728	0.0197209	3383
ACC	ICAM1	Th2	0.356118	0.00127705	0.0103838	3383
ACC	ICAM1	Tr1	0.179742	0.112954	0.71483	3383
ACC	ICAM1	iTreg	0.493285	3.85825e-06	0.000219472	3383
ACC	ICAM1	nTreg	0.265415	0.0180774	0.12244	3383
ACC	ICAM3	Bcell	-0.167736	0.139516	0.309059	3385
ACC	ICAM3	CD4_T	0.285852	0.0106575	0.178554	3385
ACC	ICAM3	CD4_naive	-0.131486	0.248062	0.488695	3385
ACC	ICAM3	CD8_T	0.205659	0.0690199	0.177412	3385
ACC	ICAM3	CD8_naive	-0.194067	0.0865759	0.288621	3385
ACC	ICAM3	Central_memory	-0.0592288	0.604108	0.8053	3385
ACC	ICAM3	Cytotoxic	0.177258	0.118101	0.251562	3385
ACC	ICAM3	DC	0.205452	0.0693056	0.320064	3385
ACC	ICAM3	Effector_memory	0.187875	0.0973062	0.46241	3385
ACC	ICAM3	Exhausted	0.223362	0.0478476	0.202086	3385
ACC	ICAM3	Gamma_delta	0.271742	0.0154111	0.0906544	3385
ACC	ICAM3	InfiltrationScore	0.348833	0.00162893	0.0151344	3385
ACC	ICAM3	MAIT	0.253948	0.0239255	0.0935807	3385
ACC	ICAM3	Macrophage	0.351571	0.00148756	0.0239042	3385
ACC	ICAM3	Monocyte	-0.0334881	0.769532	0.939344	3385
ACC	ICAM3	NK	0.154752	0.173275	0.345056	3385
ACC	ICAM3	NKT	0.145494	0.200762	0.416013	3385
ACC	ICAM3	Neutrophil	-0.153735	0.176151	0.323866	3385
ACC	ICAM3	Tfh	0.248586	0.0271704	0.104521	3385
ACC	ICAM3	Th1	0.156363	0.168787	0.336223	3385
ACC	ICAM3	Th17	-0.178273	0.115977	0.302942	3385
ACC	ICAM3	Th2	0.11674	0.305565	0.494989	3385
ACC	ICAM3	Tr1	0.0112369	0.921704	0.992571	3385
ACC	ICAM3	iTreg	-0.0476346	0.67677	0.827669	3385
ACC	ICAM3	nTreg	-0.118606	0.297845	0.567666	3385
ACC	ITGA2	Bcell	-0.128014	0.26088	0.45983	3673
ACC	ITGA2	CD4_T	0.0730362	0.522388	0.831097	3673
ACC	ITGA2	CD4_naive	0.110125	0.333965	0.57788	3673
ACC	ITGA2	CD8_T	-0.0628686	0.582027	0.735158	3673
ACC	ITGA2	CD8_naive	-0.0968021	0.396061	0.651382	3673
ACC	ITGA2	Central_memory	0.39091	0.000368106	0.00891661	3673
ACC	ITGA2	Cytotoxic	-0.125017	0.272303	0.448119	3673
ACC	ITGA2	DC	-0.112537	0.323421	0.639411	3673
ACC	ITGA2	Effector_memory	-0.0650699	0.568854	0.860442	3673
ACC	ITGA2	Exhausted	0.00200819	0.985986	0.993665	3673
ACC	ITGA2	Gamma_delta	-0.288603	0.00989693	0.0696467	3673
ACC	ITGA2	InfiltrationScore	-0.210308	0.0628393	0.189801	3673
ACC	ITGA2	MAIT	-0.0683103	0.549722	0.729341	3673
ACC	ITGA2	Macrophage	-0.141643	0.213067	0.483408	3673
ACC	ITGA2	Monocyte	-0.137519	0.226829	0.658719	3673
ACC	ITGA2	NK	-0.107452	0.345903	0.541901	3673
ACC	ITGA2	NKT	0.0557295	0.625678	0.791158	3673
ACC	ITGA2	Neutrophil	0.092942	0.415253	0.582859	3673
ACC	ITGA2	Tfh	0.0298763	0.793805	0.89097	3673
ACC	ITGA2	Th1	0.112093	0.325348	0.515314	3673
ACC	ITGA2	Th17	0.0843949	0.459614	0.676404	3673
ACC	ITGA2	Th2	-0.0424396	0.710364	0.831478	3673
ACC	ITGA2	Tr1	-0.197	0.0818302	0.68368	3673
ACC	ITGA2	iTreg	0.23463	0.0374018	0.139157	3673
ACC	ITGA2	nTreg	0.0700401	0.539637	0.762893	3673
ACC	LCP1	Bcell	-0.480492	7.4096e-06	0.000191125	3936
ACC	LCP1	CD4_T	0.245609	0.0291273	0.277301	3936
ACC	LCP1	CD4_naive	-0.218927	0.0525698	0.1948	3936
ACC	LCP1	CD8_T	0.428261	8.2414e-05	0.00107453	3936
ACC	LCP1	CD8_naive	-0.307485	0.00584147	0.0588003	3936
ACC	LCP1	Central_memory	0.247803	0.027674	0.146295	3936
ACC	LCP1	Cytotoxic	0.418138	0.000125816	0.00118123	3936
ACC	LCP1	DC	0.318075	0.00428155	0.0761037	3936
ACC	LCP1	Effector_memory	0.104977	0.35719	0.743922	3936
ACC	LCP1	Exhausted	0.292706	0.00885082	0.0697904	3936
ACC	LCP1	Gamma_delta	0.0558677	0.62482	0.796267	3936
ACC	LCP1	InfiltrationScore	0.408589	0.000185273	0.00287846	3936
ACC	LCP1	MAIT	0.324024	0.00357847	0.0248963	3936
ACC	LCP1	Macrophage	0.384143	0.00047401	0.0100575	3936
ACC	LCP1	Monocyte	-0.0383939	0.736918	0.927763	3936
ACC	LCP1	NK	0.271381	0.0155534	0.0660555	3936
ACC	LCP1	NKT	0.32529	0.00344286	0.0282157	3936
ACC	LCP1	Neutrophil	-0.331597	0.00283328	0.0143222	3936
ACC	LCP1	Tfh	0.342525	0.00200194	0.0152326	3936
ACC	LCP1	Th1	0.331252	0.00286392	0.0173484	3936
ACC	LCP1	Th17	-0.221961	0.0493001	0.179372	3936
ACC	LCP1	Th2	0.307218	0.0058866	0.0320198	3936
ACC	LCP1	Tr1	-0.106506	0.35019	0.861204	3936
ACC	LCP1	iTreg	0.431466	7.1879e-05	0.00172835	3936
ACC	LCP1	nTreg	0.256719	0.0223822	0.138196	3936
ACC	MMP1	Bcell	0.112947	0.321652	0.525115	4312
ACC	MMP1	CD4_T	-0.176339	0.120051	0.488732	4312
ACC	MMP1	CD4_naive	-0.117732	0.301443	0.544402	4312
ACC	MMP1	CD8_T	-0.0821302	0.471789	0.64711	4312
ACC	MMP1	CD8_naive	-0.0527739	0.644146	0.823157	4312
ACC	MMP1	Central_memory	-0.0809772	0.478054	0.723574	4312
ACC	MMP1	Cytotoxic	-0.0453754	0.691307	0.813675	4312
ACC	MMP1	DC	0.11458	0.314659	0.631985	4312
ACC	MMP1	Effector_memory	-0.0959281	0.400359	0.772708	4312
ACC	MMP1	Exhausted	-0.0482458	0.672858	0.836992	4312
ACC	MMP1	Gamma_delta	0.103857	0.362372	0.596756	4312
ACC	MMP1	InfiltrationScore	-0.101871	0.371674	0.581164	4312
ACC	MMP1	MAIT	-0.0683331	0.549588	0.729262	4312
ACC	MMP1	Macrophage	0.000742861	0.994816	0.997352	4312
ACC	MMP1	Monocyte	-0.123614	0.277762	0.695367	4312
ACC	MMP1	NK	-0.0496679	0.663788	0.798339	4312
ACC	MMP1	NKT	0.138079	0.224927	0.442846	4312
ACC	MMP1	Neutrophil	0.0276715	0.808721	0.886678	4312
ACC	MMP1	Tfh	-0.0239317	0.834176	0.914413	4312
ACC	MMP1	Th1	-0.0821125	0.471885	0.648785	4312
ACC	MMP1	Th17	0.0390403	0.732654	0.864287	4312
ACC	MMP1	Th2	-0.128817	0.257878	0.4458	4312
ACC	MMP1	Tr1	0.233579	0.0382885	0.592521	4312
ACC	MMP1	iTreg	-0.101531	0.373281	0.587601	4312
ACC	MMP1	nTreg	-0.0310404	0.78596	0.907754	4312
ACC	MMP10	Bcell	0.0690631	0.545322	0.719861	4319
ACC	MMP10	CD4_T	-0.149381	0.188864	0.5816	4319
ACC	MMP10	CD4_naive	0.0248244	0.828083	0.918645	4319
ACC	MMP10	CD8_T	-0.212498	0.0600872	0.160797	4319
ACC	MMP10	CD8_naive	-0.103996	0.361727	0.622631	4319
ACC	MMP10	Central_memory	0.0811417	0.477158	0.723078	4319
ACC	MMP10	Cytotoxic	-0.219305	0.0521532	0.138979	4319
ACC	MMP10	DC	0.136953	0.228768	0.550886	4319
ACC	MMP10	Effector_memory	-0.0481246	0.673633	0.902875	4319
ACC	MMP10	Exhausted	-0.106375	0.35079	0.610183	4319
ACC	MMP10	Gamma_delta	-0.128624	0.258599	0.49255	4319
ACC	MMP10	InfiltrationScore	-0.0769803	0.500113	0.68822	4319
ACC	MMP10	MAIT	-0.281955	0.0118214	0.0571713	4319
ACC	MMP10	Macrophage	0.0236554	0.836063	0.92687	4319
ACC	MMP10	Monocyte	0.0887137	0.436881	0.795681	4319
ACC	MMP10	NK	-0.223433	0.047775	0.144079	4319
ACC	MMP10	NKT	-0.0237261	0.83558	0.917401	4319
ACC	MMP10	Neutrophil	0.281965	0.0118185	0.0432079	4319
ACC	MMP10	Tfh	-0.0588545	0.6064	0.769296	4319
ACC	MMP10	Th1	-0.0978925	0.390736	0.578284	4319
ACC	MMP10	Th17	0.211515	0.0613096	0.206207	4319
ACC	MMP10	Th2	-0.253957	0.0239204	0.0882225	4319
ACC	MMP10	Tr1	0.16721	0.140779	0.745325	4319
ACC	MMP10	iTreg	-0.0955757	0.402101	0.614568	4319
ACC	MMP10	nTreg	-0.220818	0.0505124	0.218025	4319
ACC	MMP12	Bcell	0.107793	0.344365	0.546808	4321
ACC	MMP12	CD4_T	0.134063	0.238834	0.631655	4321
ACC	MMP12	CD4_naive	-0.0678592	0.552367	0.753611	4321
ACC	MMP12	CD8_T	-0.179344	0.113767	0.25199	4321
ACC	MMP12	CD8_naive	-0.0629199	0.581718	0.788071	4321
ACC	MMP12	Central_memory	-0.0299417	0.793364	0.90947	4321
ACC	MMP12	Cytotoxic	-0.122819	0.280886	0.457044	4321
ACC	MMP12	DC	0.211089	0.0618461	0.303586	4321
ACC	MMP12	Effector_memory	0.0108079	0.924685	0.979826	4321
ACC	MMP12	Exhausted	-0.0496267	0.664049	0.831076	4321
ACC	MMP12	Gamma_delta	-0.185296	0.102072	0.288125	4321
ACC	MMP12	InfiltrationScore	0.0326396	0.775216	0.876391	4321
ACC	MMP12	MAIT	-0.289492	0.00966158	0.0495266	4321
ACC	MMP12	Macrophage	0.039973	0.726515	0.869581	4321
ACC	MMP12	Monocyte	-0.07855	0.491387	0.824034	4321
ACC	MMP12	NK	-0.0176243	0.877481	0.933938	4321
ACC	MMP12	NKT	0.0913557	0.423293	0.639655	4321
ACC	MMP12	Neutrophil	0.0841285	0.461037	0.623926	4321
ACC	MMP12	Tfh	0.00553138	0.961413	0.98015	4321
ACC	MMP12	Th1	-0.00510502	0.964385	0.982976	4321
ACC	MMP12	Th17	0.00439665	0.969324	0.985728	4321
ACC	MMP12	Th2	-0.230163	0.0412897	0.129899	4321
ACC	MMP12	Tr1	0.277779	0.0131902	0.467694	4321
ACC	MMP12	iTreg	0.0694981	0.542787	0.7336	4321
ACC	MMP12	nTreg	-0.123421	0.278519	0.546423	4321
ACC	MMP13	Bcell	-0.0348475	0.760452	0.869443	4322
ACC	MMP13	CD4_T	-0.108383	0.341716	0.718539	4322
ACC	MMP13	CD4_naive	-0.0316341	0.781966	0.894318	4322
ACC	MMP13	CD8_T	0.0252341	0.82529	0.899475	4322
ACC	MMP13	CD8_naive	-0.0736925	0.518647	0.74658	4322
ACC	MMP13	Central_memory	-0.207719	0.0662231	0.247916	4322
ACC	MMP13	Cytotoxic	0.0628908	0.581893	0.728973	4322
ACC	MMP13	DC	-0.0472477	0.679252	0.872646	4322
ACC	MMP13	Effector_memory	0.0153077	0.893484	0.971388	4322
ACC	MMP13	Exhausted	0.112919	0.321774	0.585521	4322
ACC	MMP13	Gamma_delta	-0.0829988	0.467099	0.683991	4322
ACC	MMP13	InfiltrationScore	-0.0350658	0.758997	0.866745	4322
ACC	MMP13	MAIT	-0.0649633	0.569489	0.743878	4322
ACC	MMP13	Macrophage	-0.0312103	0.784816	0.902195	4322
ACC	MMP13	Monocyte	0.146123	0.198799	0.635589	4322
ACC	MMP13	NK	0.0306261	0.78875	0.880722	4322
ACC	MMP13	NKT	-0.10767	0.344919	0.570678	4322
ACC	MMP13	Neutrophil	0.0375095	0.742765	0.844282	4322
ACC	MMP13	Tfh	0.0881006	0.440069	0.643261	4322
ACC	MMP13	Th1	0.00420192	0.970682	0.986073	4322
ACC	MMP13	Th17	0.0394127	0.730201	0.863172	4322
ACC	MMP13	Th2	-0.00891628	0.937838	0.969074	4322
ACC	MMP13	Tr1	-0.00563962	0.960658	0.995868	4322
ACC	MMP13	iTreg	-0.109882	0.33504	0.552396	4322
ACC	MMP13	nTreg	-0.0069142	0.951777	0.982394	4322
ACC	MMP14	Bcell	0.162915	0.151417	0.326022	4323
ACC	MMP14	CD4_T	0.0496281	0.664041	0.89551	4323
ACC	MMP14	CD4_naive	0.0303669	0.790496	0.89942	4323
ACC	MMP14	CD8_T	-0.187997	0.0970854	0.225638	4323
ACC	MMP14	CD8_naive	-0.133042	0.24246	0.507693	4323
ACC	MMP14	Central_memory	-0.0498776	0.662454	0.838406	4323
ACC	MMP14	Cytotoxic	-0.0619424	0.587611	0.733311	4323
ACC	MMP14	DC	0.137552	0.226716	0.548564	4323
ACC	MMP14	Effector_memory	0.0599308	0.599821	0.874903	4323
ACC	MMP14	Exhausted	0.0774991	0.497221	0.724432	4323
ACC	MMP14	Gamma_delta	-0.0268808	0.814088	0.907932	4323
ACC	MMP14	InfiltrationScore	0.040036	0.726101	0.847075	4323
ACC	MMP14	MAIT	-0.250053	0.0262474	0.0999348	4323
ACC	MMP14	Macrophage	0.0698419	0.540788	0.759924	4323
ACC	MMP14	Monocyte	0.282768	0.0115698	0.319923	4323
ACC	MMP14	NK	-0.0758908	0.506217	0.679458	4323
ACC	MMP14	NKT	-0.13883	0.222388	0.440118	4323
ACC	MMP14	Neutrophil	0.16127	0.155647	0.296707	4323
ACC	MMP14	Tfh	-0.0978694	0.390848	0.60219	4323
ACC	MMP14	Th1	-0.14402	0.205409	0.381893	4323
ACC	MMP14	Th17	0.0137798	0.904063	0.954033	4323
ACC	MMP14	Th2	-0.16002	0.158919	0.326418	4323
ACC	MMP14	Tr1	0.194851	0.085287	0.685468	4323
ACC	MMP14	iTreg	-0.0395349	0.729397	0.858558	4323
ACC	MMP14	nTreg	-0.168952	0.136627	0.377964	4323
ACC	MMP2	Bcell	-0.238877	0.0339945	0.120758	4313
ACC	MMP2	CD4_T	0.413458	0.000152315	0.0345716	4313
ACC	MMP2	CD4_naive	-0.305071	0.00626073	0.0483431	4313
ACC	MMP2	CD8_T	0.450073	3.1605e-05	0.000496917	4313
ACC	MMP2	CD8_naive	-0.0770326	0.499821	0.731689	4313
ACC	MMP2	Central_memory	0.0433894	0.704179	0.862305	4313
ACC	MMP2	Cytotoxic	0.52637	6.27998e-07	1.4036e-05	4313
ACC	MMP2	DC	-0.0252707	0.825041	0.934601	4313
ACC	MMP2	Effector_memory	0.263414	0.0189995	0.227589	4313
ACC	MMP2	Exhausted	0.284159	0.0111502	0.0813177	4313
ACC	MMP2	Gamma_delta	0.119052	0.296016	0.533369	4313
ACC	MMP2	InfiltrationScore	0.299789	0.0072714	0.0440336	4313
ACC	MMP2	MAIT	0.348307	0.00165745	0.0142169	4313
ACC	MMP2	Macrophage	0.142532	0.210181	0.47958	4313
ACC	MMP2	Monocyte	0.0501166	0.660936	0.901424	4313
ACC	MMP2	NK	0.322734	0.00372151	0.0234686	4313
ACC	MMP2	NKT	0.261679	0.019831	0.0930476	4313
ACC	MMP2	Neutrophil	-0.510919	1.50133e-06	3.1821e-05	4313
ACC	MMP2	Tfh	0.540896	2.65825e-07	1.0915e-05	4313
ACC	MMP2	Th1	0.444489	4.0648e-05	0.000581457	4313
ACC	MMP2	Th17	-0.489035	4.80618e-06	0.000655628	4313
ACC	MMP2	Th2	0.36148	0.00106364	0.00912376	4313
ACC	MMP2	Tr1	0.0920084	0.419974	0.882058	4313
ACC	MMP2	iTreg	0.227995	0.0432936	0.1531	4313
ACC	MMP2	nTreg	0.00837463	0.941607	0.977712	4313
ACC	MMP3	Bcell	-0.0923603	0.418191	0.616319	4314
ACC	MMP3	CD4_T	0.148091	0.192754	0.585526	4314
ACC	MMP3	CD4_naive	-0.0625971	0.583661	0.77552	4314
ACC	MMP3	CD8_T	0.0285486	0.802779	0.885908	4314
ACC	MMP3	CD8_naive	-0.13873	0.222726	0.485406	4314
ACC	MMP3	Central_memory	0.0360415	0.752503	0.889529	4314
ACC	MMP3	Cytotoxic	0.00455829	0.968197	0.982585	4314
ACC	MMP3	DC	0.00313265	0.978141	0.992143	4314
ACC	MMP3	Effector_memory	0.102481	0.368802	0.751439	4314
ACC	MMP3	Exhausted	0.237626	0.0349698	0.167679	4314
ACC	MMP3	Gamma_delta	-0.0361323	0.7519	0.87494	4314
ACC	MMP3	InfiltrationScore	0.0466861	0.68286	0.820074	4314
ACC	MMP3	MAIT	-0.047617	0.676883	0.816425	4314
ACC	MMP3	Macrophage	0.0362692	0.750991	0.883183	4314
ACC	MMP3	Monocyte	0.106771	0.348989	0.746763	4314
ACC	MMP3	NK	0.0145773	0.898538	0.94606	4314
ACC	MMP3	NKT	0.153638	0.176427	0.384709	4314
ACC	MMP3	Neutrophil	-0.0202832	0.859174	0.9203	4314
ACC	MMP3	Tfh	0.115156	0.312218	0.524938	4314
ACC	MMP3	Th1	0.184847	0.102921	0.241917	4314
ACC	MMP3	Th17	0.136572	0.230077	0.457665	4314
ACC	MMP3	Th2	0.128944	0.257404	0.445322	4314
ACC	MMP3	Tr1	-0.160284	0.158224	0.747673	4314
ACC	MMP3	iTreg	0.0171306	0.880887	0.94147	4314
ACC	MMP3	nTreg	-0.175083	0.122755	0.357541	4314
ACC	MMP9	Bcell	-0.0950978	0.404469	0.603329	4318
ACC	MMP9	CD4_T	0.166413	0.142709	0.521263	4318
ACC	MMP9	CD4_naive	-0.254213	0.0237745	0.116614	4318
ACC	MMP9	CD8_T	0.184151	0.104247	0.23751	4318
ACC	MMP9	CD8_naive	-0.107417	0.346061	0.608053	4318
ACC	MMP9	Central_memory	-0.125241	0.271438	0.542517	4318
ACC	MMP9	Cytotoxic	0.312731	0.0050152	0.0233256	4318
ACC	MMP9	DC	0.157978	0.164374	0.475452	4318
ACC	MMP9	Effector_memory	0.152396	0.17999	0.592888	4318
ACC	MMP9	Exhausted	0.203562	0.0719632	0.259619	4318
ACC	MMP9	Gamma_delta	0.121414	0.286469	0.523027	4318
ACC	MMP9	InfiltrationScore	0.201288	0.0752686	0.212954	4318
ACC	MMP9	MAIT	0.0966107	0.397	0.600472	4318
ACC	MMP9	Macrophage	0.193252	0.087932	0.30471	4318
ACC	MMP9	Monocyte	0.0426058	0.709281	0.919676	4318
ACC	MMP9	NK	0.133743	0.239965	0.427912	4318
ACC	MMP9	NKT	0.154617	0.173652	0.381159	4318
ACC	MMP9	Neutrophil	-0.26081	0.0202592	0.0654207	4318
ACC	MMP9	Tfh	0.195653	0.0839831	0.228885	4318
ACC	MMP9	Th1	0.297706	0.00770807	0.0371775	4318
ACC	MMP9	Th17	-0.334877	0.00255606	0.0266678	4318
ACC	MMP9	Th2	0.107415	0.346069	0.536435	4318
ACC	MMP9	Tr1	0.276184	0.0137483	0.471853	4318
ACC	MMP9	iTreg	0.178883	0.114713	0.286905	4318
ACC	MMP9	nTreg	0.0426154	0.709219	0.869786	4318
ACC	PECAM1	Bcell	-0.267033	0.0173602	0.0745705	5175
ACC	PECAM1	CD4_T	0.306338	0.00603743	0.140956	5175
ACC	PECAM1	CD4_naive	-0.495655	3.4088e-06	0.000156654	5175
ACC	PECAM1	CD8_T	0.3178	0.00431683	0.0228985	5175
ACC	PECAM1	CD8_naive	-0.36403	0.000973994	0.0202382	5175
ACC	PECAM1	Central_memory	-0.295702	0.00814952	0.0682329	5175
ACC	PECAM1	Cytotoxic	0.431527	7.169e-05	0.000742611	5175
ACC	PECAM1	DC	0.347752	0.00168804	0.0447939	5175
ACC	PECAM1	Effector_memory	0.271535	0.0154927	0.207501	5175
ACC	PECAM1	Exhausted	0.348838	0.0016287	0.0215578	5175
ACC	PECAM1	Gamma_delta	0.232772	0.0389804	0.160298	5175
ACC	PECAM1	InfiltrationScore	0.491315	4.27344e-06	0.000130519	5175
ACC	PECAM1	MAIT	0.31655	0.00448047	0.0291616	5175
ACC	PECAM1	Macrophage	0.415217	0.000141804	0.00387919	5175
ACC	PECAM1	Monocyte	-0.0560935	0.623419	0.887911	5175
ACC	PECAM1	NK	0.378127	0.000590793	0.0061876	5175
ACC	PECAM1	NKT	0.388791	0.000398672	0.00658394	5175
ACC	PECAM1	Neutrophil	-0.386668	0.000431603	0.00318424	5175
ACC	PECAM1	Tfh	0.326093	0.00335925	0.0225045	5175
ACC	PECAM1	Th1	0.380476	0.000542385	0.00472043	5175
ACC	PECAM1	Th17	-0.341414	0.00207504	0.0232161	5175
ACC	PECAM1	Th2	0.325854	0.0033839	0.0213053	5175
ACC	PECAM1	Tr1	0.152065	0.180951	0.760997	5175
ACC	PECAM1	iTreg	0.295072	0.00829279	0.0495175	5175
ACC	PECAM1	nTreg	0.163757	0.149286	0.396424	5175
ACC	SERPINE1	Bcell	-0.111921	0.326094	0.529919	5054
ACC	SERPINE1	CD4_T	0.0299327	0.793425	0.942457	5054
ACC	SERPINE1	CD4_naive	-0.0560231	0.623856	0.800641	5054
ACC	SERPINE1	CD8_T	-0.127259	0.263728	0.447256	5054
ACC	SERPINE1	CD8_naive	-0.0881469	0.439828	0.685967	5054
ACC	SERPINE1	Central_memory	-0.064611	0.571589	0.787405	5054
ACC	SERPINE1	Cytotoxic	-0.0632326	0.579839	0.72735	5054
ACC	SERPINE1	DC	0.217613	0.0540406	0.283742	5054
ACC	SERPINE1	Effector_memory	0.0473305	0.678721	0.90432	5054
ACC	SERPINE1	Exhausted	0.104842	0.357812	0.615558	5054
ACC	SERPINE1	Gamma_delta	0.00550277	0.961612	0.981676	5054
ACC	SERPINE1	InfiltrationScore	0.0570535	0.617479	0.772497	5054
ACC	SERPINE1	MAIT	-0.190799	0.092116	0.235486	5054
ACC	SERPINE1	Macrophage	0.193897	0.0868569	0.303228	5054
ACC	SERPINE1	Monocyte	0.114232	0.316141	0.722832	5054
ACC	SERPINE1	NK	-0.104275	0.360432	0.554981	5054
ACC	SERPINE1	NKT	0.036081	0.75224	0.86932	5054
ACC	SERPINE1	Neutrophil	0.153662	0.176359	0.324218	5054
ACC	SERPINE1	Tfh	-0.0572793	0.616085	0.776283	5054
ACC	SERPINE1	Th1	-0.112093	0.325348	0.515314	5054
ACC	SERPINE1	Th17	0.307598	0.00582258	0.045625	5054
ACC	SERPINE1	Th2	-0.10722	0.34695	0.537294	5054
ACC	SERPINE1	Tr1	0.0251121	0.826122	0.976712	5054
ACC	SERPINE1	iTreg	-0.0202807	0.859191	0.93079	5054
ACC	SERPINE1	nTreg	-0.192728	0.0888131	0.297339	5054
ACC	SPP1	Bcell	-0.0142915	0.900518	0.9485	6696
ACC	SPP1	CD4_T	-0.0683011	0.549776	0.84598	6696
ACC	SPP1	CD4_naive	0.0207118	0.85623	0.931584	6696
ACC	SPP1	CD8_T	-0.252095	0.0250074	0.0853943	6696
ACC	SPP1	CD8_naive	-0.111678	0.327154	0.591705	6696
ACC	SPP1	Central_memory	-0.0275131	0.809795	0.918933	6696
ACC	SPP1	Cytotoxic	-0.198997	0.0787199	0.18834	6696
ACC	SPP1	DC	0.340972	0.00210482	0.0509593	6696
ACC	SPP1	Effector_memory	0.0962471	0.398788	0.771643	6696
ACC	SPP1	Exhausted	-0.0194084	0.865189	0.939254	6696
ACC	SPP1	Gamma_delta	0.0942531	0.408674	0.635922	6696
ACC	SPP1	InfiltrationScore	0.0376137	0.742076	0.855964	6696
ACC	SPP1	MAIT	-0.17562	0.121592	0.284442	6696
ACC	SPP1	Macrophage	0.324269	0.00355178	0.0438269	6696
ACC	SPP1	Monocyte	0.188427	0.0963095	0.524955	6696
ACC	SPP1	NK	-0.337815	0.00232876	0.0167597	6696
ACC	SPP1	NKT	0.102628	0.368113	0.592408	6696
ACC	SPP1	Neutrophil	0.204558	0.0705533	0.167801	6696
ACC	SPP1	Tfh	-0.111387	0.328422	0.541705	6696
ACC	SPP1	Th1	-0.0914004	0.423065	0.607525	6696
ACC	SPP1	Th17	0.226599	0.0446266	0.168605	6696
ACC	SPP1	Th2	-0.339749	0.00218916	0.015472	6696
ACC	SPP1	Tr1	0.162129	0.153427	0.747673	6696
ACC	SPP1	iTreg	-0.0758774	0.506292	0.704749	6696
ACC	SPP1	nTreg	-0.15605	0.169651	0.425783	6696
ACC	TIMP2	Bcell	-0.0879156	0.441034	0.637236	7077
ACC	TIMP2	CD4_T	0.0137552	0.904233	0.976028	7077
ACC	TIMP2	CD4_naive	-0.144788	0.202979	0.434144	7077
ACC	TIMP2	CD8_T	0.0485908	0.670653	0.801451	7077
ACC	TIMP2	CD8_naive	-0.386198	0.000439223	0.0122714	7077
ACC	TIMP2	Central_memory	-0.158456	0.163087	0.416267	7077
ACC	TIMP2	Cytotoxic	0.163212	0.150663	0.298008	7077
ACC	TIMP2	DC	0.0958972	0.400512	0.702799	7077
ACC	TIMP2	Effector_memory	-0.0912602	0.42378	0.786871	7077
ACC	TIMP2	Exhausted	0.040972	0.719959	0.864945	7077
ACC	TIMP2	Gamma_delta	-0.287775	0.0101206	0.0704895	7077
ACC	TIMP2	InfiltrationScore	0.185987	0.100779	0.257966	7077
ACC	TIMP2	MAIT	0.0186356	0.87051	0.934567	7077
ACC	TIMP2	Macrophage	0.146244	0.198423	0.467455	7077
ACC	TIMP2	Monocyte	-0.0165919	0.884607	0.97165	7077
ACC	TIMP2	NK	0.25002	0.0262681	0.0962854	7077
ACC	TIMP2	NKT	0.165958	0.143819	0.338048	7077
ACC	TIMP2	Neutrophil	0.0283634	0.804033	0.883542	7077
ACC	TIMP2	Tfh	0.130893	0.250222	0.457868	7077
ACC	TIMP2	Th1	0.169107	0.136263	0.291638	7077
ACC	TIMP2	Th17	0.0863182	0.449411	0.668188	7077
ACC	TIMP2	Th2	0.108951	0.339177	0.529256	7077
ACC	TIMP2	Tr1	0.113444	0.319513	0.8493	7077
ACC	TIMP2	iTreg	0.247074	0.0281496	0.11423	7077
ACC	TIMP2	nTreg	0.0905747	0.427284	0.680121	7077
ACC	TNF	Bcell	-0.495987	3.35004e-06	9.8641e-05	7124
ACC	TNF	CD4_T	0.291343	0.00918699	0.168156	7124
ACC	TNF	CD4_naive	-0.386455	0.000435046	0.00754579	7124
ACC	TNF	CD8_T	0.381949	0.000513899	0.00442165	7124
ACC	TNF	CD8_naive	-0.26142	0.0199575	0.121978	7124
ACC	TNF	Central_memory	-0.0900534	0.42996	0.687667	7124
ACC	TNF	Cytotoxic	0.395655	0.000307308	0.00246712	7124
ACC	TNF	DC	0.185181	0.102289	0.388702	7124
ACC	TNF	Effector_memory	0.303653	0.00651914	0.134974	7124
ACC	TNF	Exhausted	0.574767	3.03546e-08	2.68939e-06	7124
ACC	TNF	Gamma_delta	0.116564	0.306295	0.543145	7124
ACC	TNF	InfiltrationScore	0.417166	0.000130943	0.00219942	7124
ACC	TNF	MAIT	0.386125	0.000440413	0.00553513	7124
ACC	TNF	Macrophage	0.442347	4.4715e-05	0.00148062	7124
ACC	TNF	Monocyte	-0.136128	0.231611	0.661359	7124
ACC	TNF	NK	0.399396	0.00026603	0.00343794	7124
ACC	TNF	NKT	0.206808	0.0674478	0.211079	7124
ACC	TNF	Neutrophil	-0.461946	1.8239e-05	0.000248777	7124
ACC	TNF	Tfh	0.379605	0.000559901	0.0056708	7124
ACC	TNF	Th1	0.421476	0.000109596	0.0013025	7124
ACC	TNF	Th17	-0.176877	0.118907	0.307855	7124
ACC	TNF	Th2	0.392798	0.000342711	0.00393588	7124
ACC	TNF	Tr1	-0.200453	0.0765118	0.671184	7124
ACC	TNF	iTreg	0.334381	0.00259636	0.0216389	7124
ACC	TNF	nTreg	0.198292	0.0798072	0.280613	7124
ACC	TNFRSF11B	Bcell	-0.280127	0.0124049	0.0585954	4982
ACC	TNFRSF11B	CD4_T	0.21461	0.0575269	0.363708	4982
ACC	TNFRSF11B	CD4_naive	-0.177495	0.117602	0.318811	4982
ACC	TNFRSF11B	CD8_T	0.311064	0.00526572	0.0267065	4982
ACC	TNFRSF11B	CD8_naive	0.00177735	0.987597	0.995952	4982
ACC	TNFRSF11B	Central_memory	0.0578417	0.61262	0.810712	4982
ACC	TNFRSF11B	Cytotoxic	0.234264	0.0377083	0.108667	4982
ACC	TNFRSF11B	DC	-0.0757409	0.507059	0.779899	4982
ACC	TNFRSF11B	Effector_memory	0.146157	0.198695	0.612689	4982
ACC	TNFRSF11B	Exhausted	0.232393	0.0393092	0.180437	4982
ACC	TNFRSF11B	Gamma_delta	0.102169	0.370269	0.60392	4982
ACC	TNFRSF11B	InfiltrationScore	0.181962	0.108501	0.269881	4982
ACC	TNFRSF11B	MAIT	0.334317	0.00260159	0.0197391	4982
ACC	TNFRSF11B	Macrophage	0.0982168	0.389161	0.645887	4982
ACC	TNFRSF11B	Monocyte	0.0791756	0.487932	0.822391	4982
ACC	TNFRSF11B	NK	0.184102	0.10434	0.245868	4982
ACC	TNFRSF11B	NKT	-0.138785	0.222541	0.44024	4982
ACC	TNFRSF11B	Neutrophil	-0.297775	0.00769322	0.0310523	4982
ACC	TNFRSF11B	Tfh	0.223343	0.0478672	0.156136	4982
ACC	TNFRSF11B	Th1	0.263314	0.0190466	0.0724174	4982
ACC	TNFRSF11B	Th17	-0.136815	0.22924	0.45704	4982
ACC	TNFRSF11B	Th2	0.348484	0.00164781	0.012626	4982
ACC	TNFRSF11B	Tr1	-0.0830941	0.466586	0.895792	4982
ACC	TNFRSF11B	iTreg	0.06336	0.579074	0.759776	4982
ACC	TNFRSF11B	nTreg	0.0212031	0.852857	0.938401	4982
BLCA	FGF2	Bcell	0.0523671	0.280284	0.419727	2247
BLCA	FGF2	CD4_T	0.386916	1.06646e-16	2.24068e-15	2247
BLCA	FGF2	CD4_naive	-0.252403	1.2489e-07	1.10478e-06	2247
BLCA	FGF2	CD8_T	0.101016	0.0369235	0.125728	2247
BLCA	FGF2	CD8_naive	-0.065345	0.177732	0.258175	2247
BLCA	FGF2	Central_memory	0.287314	1.47005e-09	4.0658e-08	2247
BLCA	FGF2	Cytotoxic	0.329112	3.03481e-12	2.45301e-11	2247
BLCA	FGF2	DC	-0.0171678	0.723533	0.786654	2247
BLCA	FGF2	Effector_memory	-0.222482	3.44709e-06	5.8384e-05	2247
BLCA	FGF2	Exhausted	0.198926	3.4732e-05	0.000101815	2247
BLCA	FGF2	Gamma_delta	0.0948384	0.0501819	0.0979238	2247
BLCA	FGF2	InfiltrationScore	0.373442	1.40664e-15	1.13496e-14	2247
BLCA	FGF2	MAIT	0.0118859	0.806534	0.921198	2247
BLCA	FGF2	Macrophage	0.294912	5.1343e-10	2.24474e-09	2247
BLCA	FGF2	Monocyte	-0.114135	0.0183105	0.0541186	2247
BLCA	FGF2	NK	0.455869	2.66244e-23	6.06958e-22	2247
BLCA	FGF2	NKT	0.40203	5.10947e-18	1.26211e-16	2247
BLCA	FGF2	Neutrophil	-0.490298	3.30498e-27	6.77402e-26	2247
BLCA	FGF2	Tfh	0.359445	1.81053e-14	3.804e-13	2247
BLCA	FGF2	Th1	0.143167	0.00302661	0.00700219	2247
BLCA	FGF2	Th17	-0.182243	0.000152728	0.000676856	2247
BLCA	FGF2	Th2	0.506672	3.16346e-29	1.61851e-27	2247
BLCA	FGF2	Tr1	0.394418	2.4069e-17	9.48933e-16	2247
BLCA	FGF2	iTreg	0.239633	5.43028e-07	2.7797e-06	2247
BLCA	FGF2	nTreg	-0.264969	2.71442e-08	6.07106e-07	2247
BLCA	ICAM1	Bcell	-0.201017	2.8588e-05	0.000295539	3383
BLCA	ICAM1	CD4_T	-0.00863127	0.858851	0.892451	3383
BLCA	ICAM1	CD4_naive	-0.449217	1.35006e-22	8.3917e-21	3383
BLCA	ICAM1	CD8_T	0.18194	0.000156713	0.00178024	3383
BLCA	ICAM1	CD8_naive	-0.490172	3.42173e-27	3.35613e-25	3383
BLCA	ICAM1	Central_memory	0.185992	0.000110703	0.000604373	3383
BLCA	ICAM1	Cytotoxic	0.652183	4.42806e-53	2.80867e-51	3383
BLCA	ICAM1	DC	0.402353	4.7806e-18	3.26951e-16	3383
BLCA	ICAM1	Effector_memory	-0.0108147	0.823671	0.894542	3383
BLCA	ICAM1	Exhausted	0.627265	4.42512e-48	5.35999e-46	3383
BLCA	ICAM1	Gamma_delta	-0.032584	0.501889	0.614211	3383
BLCA	ICAM1	InfiltrationScore	0.680143	2.77228e-59	2.05691e-57	3383
BLCA	ICAM1	MAIT	-0.0665539	0.169827	0.442063	3383
BLCA	ICAM1	Macrophage	0.681671	1.21315e-59	1.62619e-57	3383
BLCA	ICAM1	Monocyte	0.136682	0.00466334	0.0184953	3383
BLCA	ICAM1	NK	0.574883	6.29771e-39	3.1657e-37	3383
BLCA	ICAM1	NKT	0.337092	8.32236e-13	1.04717e-11	3383
BLCA	ICAM1	Neutrophil	-0.574976	6.08691e-39	2.12113e-37	3383
BLCA	ICAM1	Tfh	0.343865	2.69444e-13	5.14502e-12	3383
BLCA	ICAM1	Th1	0.533328	9.34297e-33	5.14682e-31	3383
BLCA	ICAM1	Th17	-0.203954	2.1678e-05	0.000122269	3383
BLCA	ICAM1	Th2	0.442471	6.75408e-22	1.65212e-20	3383
BLCA	ICAM1	Tr1	0.271596	1.17465e-08	1.35739e-07	3383
BLCA	ICAM1	iTreg	0.521772	3.45963e-31	2.41537e-29	3383
BLCA	ICAM1	nTreg	-0.0756574	0.118515	0.22654	3383
BLCA	ICAM3	Bcell	0.26157	4.1345e-08	1.53949e-06	3385
BLCA	ICAM3	CD4_T	0.340061	5.0936e-13	5.9893e-12	3385
BLCA	ICAM3	CD4_naive	-0.249149	1.83023e-07	1.56199e-06	3385
BLCA	ICAM3	CD8_T	0.484042	1.82877e-26	2.58951e-24	3385
BLCA	ICAM3	CD8_naive	-0.249656	1.72513e-07	1.03236e-06	3385
BLCA	ICAM3	Central_memory	0.245485	2.79686e-07	3.55477e-06	3385
BLCA	ICAM3	Cytotoxic	0.427328	2.2058e-20	4.02833e-19	3385
BLCA	ICAM3	DC	-0.0291871	0.547519	0.6346	3385
BLCA	ICAM3	Effector_memory	-0.115941	0.0165359	0.0547846	3385
BLCA	ICAM3	Exhausted	0.322334	8.84358e-12	6.72025e-11	3385
BLCA	ICAM3	Gamma_delta	0.375706	9.19556e-16	6.16317e-13	3385
BLCA	ICAM3	InfiltrationScore	0.471503	5.08463e-25	8.19861e-24	3385
BLCA	ICAM3	MAIT	-0.0680807	0.160222	0.43127	3385
BLCA	ICAM3	Macrophage	0.273048	9.74771e-09	3.73399e-08	3385
BLCA	ICAM3	Monocyte	-0.216825	6.14831e-06	8.6998e-05	3385
BLCA	ICAM3	NK	0.511744	7.11898e-30	2.38967e-28	3385
BLCA	ICAM3	NKT	0.220699	4.14349e-06	1.7753e-05	3385
BLCA	ICAM3	Neutrophil	-0.571044	2.54986e-38	8.68985e-37	3385
BLCA	ICAM3	Tfh	0.561215	8.42374e-37	6.25004e-35	3385
BLCA	ICAM3	Th1	0.273878	8.75802e-09	6.08072e-08	3385
BLCA	ICAM3	Th17	-0.315572	2.50409e-11	7.09152e-10	3385
BLCA	ICAM3	Th2	0.354333	4.46418e-14	5.56832e-13	3385
BLCA	ICAM3	Tr1	0.265452	2.55565e-08	2.83903e-07	3385
BLCA	ICAM3	iTreg	0.22756	2.02424e-06	9.29893e-06	3385
BLCA	ICAM3	nTreg	-0.252817	1.18922e-07	2.12549e-06	3385
BLCA	ITGA2	Bcell	-0.389113	6.92355e-17	8.70074e-14	3673
BLCA	ITGA2	CD4_T	-0.128672	0.00776436	0.0154481	3673
BLCA	ITGA2	CD4_naive	-0.160637	0.000864308	0.00294853	3673
BLCA	ITGA2	CD8_T	-0.144933	0.00268231	0.0180741	3673
BLCA	ITGA2	CD8_naive	-0.193385	5.7603e-05	0.000211715	3673
BLCA	ITGA2	Central_memory	0.0776281	0.109195	0.192985	3673
BLCA	ITGA2	Cytotoxic	0.213349	8.70726e-06	2.8833e-05	3673
BLCA	ITGA2	DC	0.321412	1.02082e-11	1.58133e-10	3673
BLCA	ITGA2	Effector_memory	0.199967	3.1532e-05	0.000361679	3673
BLCA	ITGA2	Exhausted	0.175191	0.000275073	0.000693008	3673
BLCA	ITGA2	Gamma_delta	-0.30273	1.68315e-10	8.48197e-09	3673
BLCA	ITGA2	InfiltrationScore	0.115542	0.0169144	0.028795	3673
BLCA	ITGA2	MAIT	0.0118111	0.807728	0.921309	3673
BLCA	ITGA2	Macrophage	0.232272	1.22155e-06	3.6458e-06	3673
BLCA	ITGA2	Monocyte	0.230526	1.47488e-06	2.6692e-05	3673
BLCA	ITGA2	NK	0.0289529	0.550739	0.637446	3673
BLCA	ITGA2	NKT	0.136193	0.00481457	0.0108833	3673
BLCA	ITGA2	Neutrophil	-0.105276	0.0296231	0.0565223	3673
BLCA	ITGA2	Tfh	-0.00437411	0.92819	0.956838	3673
BLCA	ITGA2	Th1	0.26927	1.58032e-08	1.04766e-07	3673
BLCA	ITGA2	Th17	-0.0282885	0.559923	0.664681	3673
BLCA	ITGA2	Th2	0.0641253	0.185981	0.276715	3673
BLCA	ITGA2	Tr1	0.0140163	0.772737	0.857852	3673
BLCA	ITGA2	iTreg	0.374592	1.1338e-15	2.35024e-14	3673
BLCA	ITGA2	nTreg	0.232926	1.13782e-06	1.4827e-05	3673
BLCA	LCP1	Bcell	-0.0106373	0.826517	0.887513	3936
BLCA	LCP1	CD4_T	0.0509448	0.293572	0.378097	3936
BLCA	LCP1	CD4_naive	-0.396122	1.70729e-17	6.90714e-16	3936
BLCA	LCP1	CD8_T	0.227016	2.1444e-06	4.0715e-05	3936
BLCA	LCP1	CD8_naive	-0.444807	3.88385e-22	2.10492e-20	3936
BLCA	LCP1	Central_memory	0.250481	1.5663e-07	2.17798e-06	3936
BLCA	LCP1	Cytotoxic	0.506937	2.92852e-29	8.69774e-28	3936
BLCA	LCP1	DC	0.266852	2.14444e-08	1.58874e-07	3936
BLCA	LCP1	Effector_memory	-0.0360449	0.457549	0.61623	3936
BLCA	LCP1	Exhausted	0.458275	1.46736e-23	4.12069e-22	3936
BLCA	LCP1	Gamma_delta	-0.0639732	0.18703	0.283456	3936
BLCA	LCP1	InfiltrationScore	0.506419	3.40612e-29	7.16389e-28	3936
BLCA	LCP1	MAIT	-0.0309423	0.523689	0.764368	3936
BLCA	LCP1	Macrophage	0.457809	1.64743e-23	2.60211e-22	3936
BLCA	LCP1	Monocyte	0.0200331	0.67976	0.788459	3936
BLCA	LCP1	NK	0.382402	2.56469e-16	3.454e-15	3936
BLCA	LCP1	NKT	0.156663	0.00116275	0.00303826	3936
BLCA	LCP1	Neutrophil	-0.445048	3.66733e-22	5.67222e-21	3936
BLCA	LCP1	Tfh	0.314005	3.17506e-11	4.98368e-10	3936
BLCA	LCP1	Th1	0.465982	2.1064e-24	7.93133e-23	3936
BLCA	LCP1	Th17	-0.225355	2.55472e-06	1.9021e-05	3936
BLCA	LCP1	Th2	0.273423	9.28741e-09	6.75378e-08	3936
BLCA	LCP1	Tr1	0.265969	2.39568e-08	2.66938e-07	3936
BLCA	LCP1	iTreg	0.494105	1.14665e-27	6.47631e-26	3936
BLCA	LCP1	nTreg	0.0155739	0.74829	0.839832	3936
BLCA	MMP1	Bcell	-0.341415	4.06439e-13	1.16747e-10	4312
BLCA	MMP1	CD4_T	-0.155952	0.00122518	0.00288293	4312
BLCA	MMP1	CD4_naive	-0.233554	1.06274e-06	7.72265e-06	4312
BLCA	MMP1	CD8_T	-0.0518329	0.285226	0.499656	4312
BLCA	MMP1	CD8_naive	-0.214071	8.10377e-06	3.5458e-05	4312
BLCA	MMP1	Central_memory	-0.0295026	0.543197	0.659584	4312
BLCA	MMP1	Cytotoxic	0.270603	1.3337e-08	6.68746e-08	4312
BLCA	MMP1	DC	0.404807	2.8743e-18	2.04942e-16	4312
BLCA	MMP1	Effector_memory	0.157896	0.00106128	0.0063171	4312
BLCA	MMP1	Exhausted	0.291214	8.60074e-10	4.96935e-09	4312
BLCA	MMP1	Gamma_delta	-0.16641	0.000554956	0.0021858	4312
BLCA	MMP1	InfiltrationScore	0.249097	1.8414e-07	6.48423e-07	4312
BLCA	MMP1	MAIT	0.0581503	0.230485	0.515331	4312
BLCA	MMP1	Macrophage	0.265145	2.65528e-08	9.66504e-08	4312
BLCA	MMP1	Monocyte	0.254085	1.02284e-07	3.09079e-06	4312
BLCA	MMP1	NK	0.170134	0.0004138	0.00110173	4312
BLCA	MMP1	NKT	0.199485	3.2975e-05	0.000117914	4312
BLCA	MMP1	Neutrophil	-0.142267	0.00321711	0.00796534	4312
BLCA	MMP1	Tfh	0.0266041	0.583532	0.71045	4312
BLCA	MMP1	Th1	0.298024	3.30703e-10	2.93314e-09	4312
BLCA	MMP1	Th17	-0.135193	0.00513732	0.0140903	4312
BLCA	MMP1	Th2	0.141849	0.00330925	0.0086843	4312
BLCA	MMP1	Tr1	0.057366	0.236845	0.38939	4312
BLCA	MMP1	iTreg	0.261944	3.94834e-08	2.5179e-07	4312
BLCA	MMP1	nTreg	0.109733	0.0233465	0.0645173	4312
BLCA	MMP10	Bcell	-0.25901	5.65377e-08	1.9909e-06	4319
BLCA	MMP10	CD4_T	-0.0572173	0.238064	0.316894	4319
BLCA	MMP10	CD4_naive	-0.0577553	0.233673	0.338263	4319
BLCA	MMP10	CD8_T	-0.115239	0.0172067	0.0733	4319
BLCA	MMP10	CD8_naive	-0.0194951	0.687903	0.762411	4319
BLCA	MMP10	Central_memory	-0.110057	0.0229381	0.0546271	4319
BLCA	MMP10	Cytotoxic	0.038185	0.431265	0.515237	4319
BLCA	MMP10	DC	0.202897	2.3959e-05	9.0503e-05	4319
BLCA	MMP10	Effector_memory	0.110196	0.0227658	0.0701858	4319
BLCA	MMP10	Exhausted	0.00700914	0.885174	0.913102	4319
BLCA	MMP10	Gamma_delta	-0.150746	0.00178557	0.00590598	4319
BLCA	MMP10	InfiltrationScore	-0.0276329	0.569057	0.641496	4319
BLCA	MMP10	MAIT	0.096247	0.0468524	0.230164	4319
BLCA	MMP10	Macrophage	-0.0661215	0.172624	0.228939	4319
BLCA	MMP10	Monocyte	0.0997735	0.0393203	0.097812	4319
BLCA	MMP10	NK	0.0289529	0.550738	0.637446	4319
BLCA	MMP10	NKT	0.119141	0.0137595	0.0277133	4319
BLCA	MMP10	Neutrophil	0.0356729	0.462207	0.560801	4319
BLCA	MMP10	Tfh	-0.0511703	0.291437	0.432786	4319
BLCA	MMP10	Th1	0.0715251	0.140064	0.205357	4319
BLCA	MMP10	Th17	-0.0507151	0.295757	0.410473	4319
BLCA	MMP10	Th2	0.0549222	0.25745	0.360002	4319
BLCA	MMP10	Tr1	-0.0370406	0.44521	0.600555	4319
BLCA	MMP10	iTreg	0.108689	0.0247021	0.0459724	4319
BLCA	MMP10	nTreg	0.12946	0.00739323	0.0254897	4319
BLCA	MMP12	Bcell	-0.324729	6.07842e-12	1.09124e-09	4321
BLCA	MMP12	CD4_T	-0.163365	0.000702316	0.00173163	4321
BLCA	MMP12	CD4_naive	-0.29154	8.22044e-10	1.17811e-08	4321
BLCA	MMP12	CD8_T	0.0382445	0.430547	0.638094	4321
BLCA	MMP12	CD8_naive	-0.240436	4.9631e-07	2.73556e-06	4321
BLCA	MMP12	Central_memory	-0.0661833	0.172222	0.276102	4321
BLCA	MMP12	Cytotoxic	0.411002	7.80829e-19	1.26004e-17	4321
BLCA	MMP12	DC	0.598271	8.32401e-43	5.57903e-39	4321
BLCA	MMP12	Effector_memory	0.14353	0.00295285	0.0142689	4321
BLCA	MMP12	Exhausted	0.411989	6.32827e-19	1.14633e-17	4321
BLCA	MMP12	Gamma_delta	-0.132732	0.00601631	0.0165214	4321
BLCA	MMP12	InfiltrationScore	0.438521	1.70567e-21	2.2041e-20	4321
BLCA	MMP12	MAIT	0.00727338	0.880876	0.95204	4321
BLCA	MMP12	Macrophage	0.417905	1.7698e-19	1.93503e-18	4321
BLCA	MMP12	Monocyte	0.220813	4.09527e-06	6.1819e-05	4321
BLCA	MMP12	NK	0.282444	2.83825e-09	1.74309e-08	4321
BLCA	MMP12	NKT	0.216135	6.59083e-06	2.7078e-05	4321
BLCA	MMP12	Neutrophil	-0.272405	1.05891e-08	6.70387e-08	4321
BLCA	MMP12	Tfh	0.0745761	0.123886	0.229035	4321
BLCA	MMP12	Th1	0.435259	3.63249e-21	1.11339e-19	4321
BLCA	MMP12	Th17	-0.259167	5.54713e-08	6.44769e-07	4321
BLCA	MMP12	Th2	0.19138	6.8937e-05	0.00026915	4321
BLCA	MMP12	Tr1	0.194553	5.1837e-05	0.000344104	4321
BLCA	MMP12	iTreg	0.419737	1.18679e-19	3.70539e-18	4321
BLCA	MMP12	nTreg	0.0667433	0.168613	0.295686	4321
BLCA	MMP13	Bcell	-0.286507	1.64077e-09	1.12983e-07	4322
BLCA	MMP13	CD4_T	-0.120927	0.0123952	0.02353	4322
BLCA	MMP13	CD4_naive	-0.10421	0.0313223	0.0645243	4322
BLCA	MMP13	CD8_T	-0.120345	0.0128256	0.0587702	4322
BLCA	MMP13	CD8_naive	-0.0402008	0.407327	0.508135	4322
BLCA	MMP13	Central_memory	-0.0400951	0.408561	0.53528	4322
BLCA	MMP13	Cytotoxic	0.104398	0.031017	0.0530051	4322
BLCA	MMP13	DC	0.342655	3.30265e-13	7.20244e-12	4322
BLCA	MMP13	Effector_memory	0.0868166	0.0731166	0.169334	4322
BLCA	MMP13	Exhausted	0.120322	0.012843	0.0237173	4322
BLCA	MMP13	Gamma_delta	-0.253064	1.15485e-07	1.65862e-06	4322
BLCA	MMP13	InfiltrationScore	0.146744	0.00236655	0.00472676	4322
BLCA	MMP13	MAIT	-0.0491506	0.310925	0.597408	4322
BLCA	MMP13	Macrophage	0.15487	0.00132621	0.00267732	4322
BLCA	MMP13	Monocyte	0.256917	7.28501e-08	2.38955e-06	4322
BLCA	MMP13	NK	0.0650647	0.179604	0.252874	4322
BLCA	MMP13	NKT	0.174975	0.000279989	0.000837634	4322
BLCA	MMP13	Neutrophil	-0.0650373	0.179787	0.260446	4322
BLCA	MMP13	Tfh	-0.0615645	0.204212	0.334105	4322
BLCA	MMP13	Th1	0.109655	0.0234445	0.0434428	4322
BLCA	MMP13	Th17	-0.0175518	0.71761	0.797093	4322
BLCA	MMP13	Th2	0.163465	0.000696956	0.00216695	4322
BLCA	MMP13	Tr1	0.0439489	0.364971	0.523839	4322
BLCA	MMP13	iTreg	0.169767	0.000426065	0.0011915	4322
BLCA	MMP13	nTreg	0.0815101	0.0925329	0.188545	4322
BLCA	MMP14	Bcell	-0.320299	1.21303e-11	1.93575e-09	4323
BLCA	MMP14	CD4_T	-0.0710389	0.142786	0.204007	4323
BLCA	MMP14	CD4_naive	-0.219312	4.77626e-06	2.976e-05	4323
BLCA	MMP14	CD8_T	-0.06273	0.19576	0.392101	4323
BLCA	MMP14	CD8_naive	-0.106146	0.0282946	0.0538393	4323
BLCA	MMP14	Central_memory	0.0606493	0.211032	0.322874	4323
BLCA	MMP14	Cytotoxic	0.318155	1.68772e-11	1.23986e-10	4323
BLCA	MMP14	DC	0.436447	2.76062e-21	4.20514e-19	4323
BLCA	MMP14	Effector_memory	-0.000834644	0.98628	0.992486	4323
BLCA	MMP14	Exhausted	0.300101	2.45847e-10	1.52805e-09	4323
BLCA	MMP14	Gamma_delta	-0.180476	0.000177369	0.000823068	4323
BLCA	MMP14	InfiltrationScore	0.429233	1.43637e-20	1.73669e-19	4323
BLCA	MMP14	MAIT	-0.0524023	0.279961	0.567342	4323
BLCA	MMP14	Macrophage	0.515371	2.41193e-30	6.59818e-29	4323
BLCA	MMP14	Monocyte	0.340131	5.03475e-13	1.42583e-10	4323
BLCA	MMP14	NK	0.248678	1.93359e-07	9.14576e-07	4323
BLCA	MMP14	NKT	0.366981	4.64644e-15	7.87739e-14	4323
BLCA	MMP14	Neutrophil	-0.312962	3.71629e-11	2.97466e-10	4323
BLCA	MMP14	Tfh	0.0248497	0.608603	0.731189	4323
BLCA	MMP14	Th1	0.238775	5.97712e-07	2.9807e-06	4323
BLCA	MMP14	Th17	-0.154406	0.00137185	0.00454801	4323
BLCA	MMP14	Th2	0.268886	1.65915e-08	1.17014e-07	4323
BLCA	MMP14	Tr1	0.226635	2.23247e-06	1.8996e-05	4323
BLCA	MMP14	iTreg	0.343787	2.73015e-13	4.26204e-12	4323
BLCA	MMP14	nTreg	-0.012786	0.792207	0.87148	4323
BLCA	MMP2	Bcell	-0.18446	0.000126364	0.000978363	4313
BLCA	MMP2	CD4_T	0.27962	4.13261e-09	2.60239e-08	4313
BLCA	MMP2	CD4_naive	-0.247528	2.20994e-07	1.85922e-06	4313
BLCA	MMP2	CD8_T	0.0436974	0.367723	0.582465	4313
BLCA	MMP2	CD8_naive	-0.0200113	0.680088	0.755416	4313
BLCA	MMP2	Central_memory	0.207114	1.6024e-05	0.000115315	4313
BLCA	MMP2	Cytotoxic	0.294397	5.51934e-10	3.3437e-09	4313
BLCA	MMP2	DC	0.237327	7.0205e-07	3.67129e-06	4313
BLCA	MMP2	Effector_memory	-0.200233	3.076e-05	0.000354839	4313
BLCA	MMP2	Exhausted	0.259287	5.46646e-08	2.47054e-07	4313
BLCA	MMP2	Gamma_delta	-0.00927681	0.848418	0.894835	4313
BLCA	MMP2	InfiltrationScore	0.491633	2.28327e-27	4.29867e-26	4313
BLCA	MMP2	MAIT	-0.0410973	0.396938	0.671991	4313
BLCA	MMP2	Macrophage	0.484324	1.69472e-26	3.47003e-25	4313
BLCA	MMP2	Monocyte	0.251308	1.42113e-07	4.03596e-06	4313
BLCA	MMP2	NK	0.371729	1.9358e-15	2.38645e-14	4313
BLCA	MMP2	NKT	0.453397	4.8877e-23	2.27493e-21	4313
BLCA	MMP2	Neutrophil	-0.505071	5.04069e-29	1.12241e-27	4313
BLCA	MMP2	Tfh	0.270971	1.27246e-08	1.47126e-07	4313
BLCA	MMP2	Th1	0.100848	0.0372397	0.0654013	4313
BLCA	MMP2	Th17	-0.100564	0.0377812	0.0771393	4313
BLCA	MMP2	Th2	0.468335	1.15284e-24	3.63325e-23	4313
BLCA	MMP2	Tr1	0.348536	1.2181e-13	2.64496e-12	4313
BLCA	MMP2	iTreg	0.198654	3.5616e-05	0.000126126	4313
BLCA	MMP2	nTreg	-0.253493	1.09756e-07	1.9828e-06	4313
BLCA	MMP3	Bcell	-0.213466	8.60631e-06	0.000113847	4314
BLCA	MMP3	CD4_T	0.062896	0.194578	0.266365	4314
BLCA	MMP3	CD4_naive	-0.292046	7.66256e-10	1.10604e-08	4314
BLCA	MMP3	CD8_T	-0.079628	0.100338	0.252506	4314
BLCA	MMP3	CD8_naive	-0.155695	0.00124851	0.00340393	4314
BLCA	MMP3	Central_memory	0.0796845	0.100096	0.180291	4314
BLCA	MMP3	Cytotoxic	0.299033	2.86428e-10	1.79638e-09	4314
BLCA	MMP3	DC	0.358355	2.19778e-14	6.43242e-13	4314
BLCA	MMP3	Effector_memory	-0.00906136	0.851897	0.912754	4314
BLCA	MMP3	Exhausted	0.313708	3.32079e-11	2.34696e-10	4314
BLCA	MMP3	Gamma_delta	-0.171916	0.000358821	0.00150622	4314
BLCA	MMP3	InfiltrationScore	0.410612	8.48317e-19	8.91642e-18	4314
BLCA	MMP3	MAIT	0.000621096	0.98979	0.99663	4314
BLCA	MMP3	Macrophage	0.416845	2.22792e-19	2.41622e-18	4314
BLCA	MMP3	Monocyte	0.212787	9.20592e-06	0.000121969	4314
BLCA	MMP3	NK	0.290936	8.93765e-10	5.91928e-09	4314
BLCA	MMP3	NKT	0.402581	4.56077e-18	1.13635e-16	4314
BLCA	MMP3	Neutrophil	-0.30951	6.22661e-11	4.87913e-10	4314
BLCA	MMP3	Tfh	0.0823375	0.089259	0.177608	4314
BLCA	MMP3	Th1	0.234533	9.54939e-07	4.56188e-06	4314
BLCA	MMP3	Th17	-0.0748032	0.122743	0.203529	4314
BLCA	MMP3	Th2	0.310414	5.44307e-11	5.06215e-10	4314
BLCA	MMP3	Tr1	0.242398	3.97739e-07	3.76523e-06	4314
BLCA	MMP3	iTreg	0.272703	1.01912e-08	7.30534e-08	4314
BLCA	MMP3	nTreg	-0.0492109	0.310331	0.459588	4314
BLCA	MMP9	Bcell	-0.155646	0.00125304	0.00617523	4318
BLCA	MMP9	CD4_T	-0.0280507	0.563228	0.644848	4318
BLCA	MMP9	CD4_naive	-0.383905	1.9177e-16	6.97272e-15	4318
BLCA	MMP9	CD8_T	0.208651	1.3811e-05	0.000214932	4318
BLCA	MMP9	CD8_naive	-0.31563	2.48199e-11	2.90654e-10	4318
BLCA	MMP9	Central_memory	0.115914	0.016561	0.0416813	4318
BLCA	MMP9	Cytotoxic	0.570443	3.16877e-38	1.28198e-36	4318
BLCA	MMP9	DC	0.493282	1.44317e-27	8.06051e-25	4318
BLCA	MMP9	Effector_memory	-0.000525319	0.991364	0.995321	4318
BLCA	MMP9	Exhausted	0.547014	1.07813e-34	5.98837e-33	4318
BLCA	MMP9	Gamma_delta	-0.0956277	0.0482926	0.0949281	4318
BLCA	MMP9	InfiltrationScore	0.682969	5.98753e-60	4.57762e-58	4318
BLCA	MMP9	MAIT	-0.0201854	0.67746	0.855473	4318
BLCA	MMP9	Macrophage	0.644761	1.52783e-51	1.44226e-49	4318
BLCA	MMP9	Monocyte	0.205005	1.9615e-05	0.000223959	4318
BLCA	MMP9	NK	0.453011	5.37188e-23	1.2055e-21	4318
BLCA	MMP9	NKT	0.331082	2.21261e-12	2.61238e-11	4318
BLCA	MMP9	Neutrophil	-0.522969	2.39554e-31	5.99839e-30	4318
BLCA	MMP9	Tfh	0.255781	8.35182e-08	8.50279e-07	4318
BLCA	MMP9	Th1	0.444851	3.84341e-22	1.25454e-20	4318
BLCA	MMP9	Th17	-0.307623	8.23319e-11	2.06849e-09	4318
BLCA	MMP9	Th2	0.365169	6.46552e-15	8.6589e-14	4318
BLCA	MMP9	Tr1	0.437916	1.96338e-21	1.67278e-19	4318
BLCA	MMP9	iTreg	0.474192	2.52109e-25	1.23174e-23	4318
BLCA	MMP9	nTreg	-0.0572515	0.237784	0.379725	4318
BLCA	PECAM1	Bcell	0.0525782	0.278347	0.417666	5175
BLCA	PECAM1	CD4_T	0.371447	2.03995e-15	3.54209e-14	5175
BLCA	PECAM1	CD4_naive	-0.2715	1.18928e-08	1.34473e-07	5175
BLCA	PECAM1	CD8_T	0.227184	2.10658e-06	4.0073e-05	5175
BLCA	PECAM1	CD8_naive	-0.172228	0.000349928	0.0010813	5175
BLCA	PECAM1	Central_memory	0.20111	2.8342e-05	0.000188511	5175
BLCA	PECAM1	Cytotoxic	0.408807	1.24304e-18	1.96956e-17	5175
BLCA	PECAM1	DC	0.112272	0.0203122	0.0386467	5175
BLCA	PECAM1	Effector_memory	-0.242353	3.99783e-07	9.96088e-06	5175
BLCA	PECAM1	Exhausted	0.256655	7.51848e-08	3.3269e-07	5175
BLCA	PECAM1	Gamma_delta	0.193285	5.8126e-05	0.000318543	5175
BLCA	PECAM1	InfiltrationScore	0.529009	3.66289e-32	8.92725e-31	5175
BLCA	PECAM1	MAIT	0.147202	0.00229237	0.0422215	5175
BLCA	PECAM1	Macrophage	0.446224	2.76999e-22	3.85707e-21	5175
BLCA	PECAM1	Monocyte	-0.00654117	0.892792	0.936919	5175
BLCA	PECAM1	NK	0.476788	1.27323e-25	3.46426e-24	5175
BLCA	PECAM1	NKT	0.460341	8.76238e-24	4.60555e-22	5175
BLCA	PECAM1	Neutrophil	-0.536881	2.99139e-33	8.11711e-32	5175
BLCA	PECAM1	Tfh	0.445374	3.39308e-22	1.26342e-20	5175
BLCA	PECAM1	Th1	0.170176	0.000412436	0.00116473	5175
BLCA	PECAM1	Th17	-0.241217	4.54517e-07	4.13903e-06	5175
BLCA	PECAM1	Th2	0.457559	1.75264e-23	4.97043e-22	5175
BLCA	PECAM1	Tr1	0.384532	1.69803e-16	5.70941e-15	5175
BLCA	PECAM1	iTreg	0.138986	0.00400773	0.00905634	5175
BLCA	PECAM1	nTreg	-0.39737	1.32574e-17	1.55315e-14	5175
BLCA	SERPINE1	Bcell	-0.309788	5.97508e-11	6.78762e-09	5054
BLCA	SERPINE1	CD4_T	-0.0445992	0.357911	0.445828	5054
BLCA	SERPINE1	CD4_naive	-0.17109	0.000383397	0.00144444	5054
BLCA	SERPINE1	CD8_T	-0.0644664	0.183646	0.376986	5054
BLCA	SERPINE1	CD8_naive	-0.185631	0.00011422	0.00039292	5054
BLCA	SERPINE1	Central_memory	0.135972	0.00488441	0.0148404	5054
BLCA	SERPINE1	Cytotoxic	0.305906	1.05978e-10	7.03265e-10	5054
BLCA	SERPINE1	DC	0.289577	1.07809e-09	1.05075e-08	5054
BLCA	SERPINE1	Effector_memory	-0.0568687	0.240941	0.400645	5054
BLCA	SERPINE1	Exhausted	0.310948	5.02645e-11	3.47548e-10	5054
BLCA	SERPINE1	Gamma_delta	-0.103175	0.0330517	0.0692116	5054
BLCA	SERPINE1	InfiltrationScore	0.350155	9.22237e-14	6.2268e-13	5054
BLCA	SERPINE1	MAIT	0.0943184	0.0514601	0.242894	5054
BLCA	SERPINE1	Macrophage	0.446263	2.74429e-22	3.82394e-21	5054
BLCA	SERPINE1	Monocyte	0.253918	1.04336e-07	3.1392e-06	5054
BLCA	SERPINE1	NK	0.251527	1.38498e-07	6.71029e-07	5054
BLCA	SERPINE1	NKT	0.259913	5.06462e-08	3.06822e-07	5054
BLCA	SERPINE1	Neutrophil	-0.260541	4.6906e-08	2.74967e-07	5054
BLCA	SERPINE1	Tfh	0.12636	0.00895081	0.0273683	5054
BLCA	SERPINE1	Th1	0.209246	1.3035e-05	5.016e-05	5054
BLCA	SERPINE1	Th17	-0.183859	0.000133054	0.00060303	5054
BLCA	SERPINE1	Th2	0.19379	5.5538e-05	0.000220691	5054
BLCA	SERPINE1	Tr1	0.0983618	0.0422026	0.105412	5054
BLCA	SERPINE1	iTreg	0.219436	4.71601e-06	2.0154e-05	5054
BLCA	SERPINE1	nTreg	-0.107524	0.0262966	0.0709172	5054
BLCA	SPP1	Bcell	-0.244483	3.13715e-07	7.95443e-06	6696
BLCA	SPP1	CD4_T	-0.181641	0.000160735	0.000452836	6696
BLCA	SPP1	CD4_naive	-0.309788	5.9748e-11	1.03834e-09	6696
BLCA	SPP1	CD8_T	-0.00291394	0.952126	0.976157	6696
BLCA	SPP1	CD8_naive	-0.292735	6.96249e-10	6.43062e-09	6696
BLCA	SPP1	Central_memory	-0.0536718	0.268458	0.388869	6696
BLCA	SPP1	Cytotoxic	0.357051	2.76843e-14	2.8473e-13	6696
BLCA	SPP1	DC	0.471611	4.94412e-25	1.71399e-22	6696
BLCA	SPP1	Effector_memory	0.0961642	0.0470428	0.121893	6696
BLCA	SPP1	Exhausted	0.413558	4.52492e-19	8.32892e-18	6696
BLCA	SPP1	Gamma_delta	-0.16989	0.000421917	0.00173274	6696
BLCA	SPP1	InfiltrationScore	0.529961	2.71486e-32	6.67331e-31	6696
BLCA	SPP1	MAIT	0.00578875	0.905062	0.962216	6696
BLCA	SPP1	Macrophage	0.614597	1.04181e-45	7.37592e-44	6696
BLCA	SPP1	Monocyte	0.411948	6.38462e-19	3.20939e-15	6696
BLCA	SPP1	NK	0.227457	2.04647e-06	8.23461e-06	6696
BLCA	SPP1	NKT	0.195528	4.7445e-05	0.000164849	6696
BLCA	SPP1	Neutrophil	-0.257512	6.77983e-08	3.88825e-07	6696
BLCA	SPP1	Tfh	0.0110649	0.81966	0.888171	6696
BLCA	SPP1	Th1	0.302518	1.73561e-10	1.60377e-09	6696
BLCA	SPP1	Th17	-0.1011	0.0367653	0.0754026	6696
BLCA	SPP1	Th2	0.255955	8.17853e-08	5.29445e-07	6696
BLCA	SPP1	Tr1	0.242675	3.85432e-07	3.6556e-06	6696
BLCA	SPP1	iTreg	0.314854	2.79242e-11	3.14903e-10	6696
BLCA	SPP1	nTreg	-0.0380578	0.432803	0.582464	6696
BLCA	TIMP2	Bcell	-0.143445	0.00296985	0.0121248	7077
BLCA	TIMP2	CD4_T	0.201308	2.7821e-05	9.0737e-05	7077
BLCA	TIMP2	CD4_naive	-0.312514	3.97478e-11	7.13579e-10	7077
BLCA	TIMP2	CD8_T	0.0440651	0.363703	0.579154	7077
BLCA	TIMP2	CD8_naive	-0.122406	0.0113573	0.0242756	7077
BLCA	TIMP2	Central_memory	0.172638	0.000338544	0.00156019	7077
BLCA	TIMP2	Cytotoxic	0.394814	2.2225e-17	3.12284e-16	7077
BLCA	TIMP2	DC	0.294789	5.22368e-10	5.46315e-09	7077
BLCA	TIMP2	Effector_memory	-0.183604	0.000135994	0.00120248	7077
BLCA	TIMP2	Exhausted	0.378172	5.76531e-16	7.37424e-15	7077
BLCA	TIMP2	Gamma_delta	-0.0182103	0.707492	0.788425	7077
BLCA	TIMP2	InfiltrationScore	0.604929	5.71287e-44	2.35387e-42	7077
BLCA	TIMP2	MAIT	-0.116221	0.0162748	0.133784	7077
BLCA	TIMP2	Macrophage	0.614472	1.09839e-45	7.74923e-44	7077
BLCA	TIMP2	Monocyte	0.216879	6.11449e-06	8.6702e-05	7077
BLCA	TIMP2	NK	0.475638	1.72426e-25	4.64741e-24	7077
BLCA	TIMP2	NKT	0.516972	1.4898e-30	1.9838e-28	7077
BLCA	TIMP2	Neutrophil	-0.547643	8.74013e-35	2.54324e-33	7077
BLCA	TIMP2	Tfh	0.238582	6.10706e-07	5.37395e-06	7077
BLCA	TIMP2	Th1	0.1973	4.0346e-05	0.000139678	7077
BLCA	TIMP2	Th17	-0.106848	0.0272607	0.0587431	7077
BLCA	TIMP2	Th2	0.523838	1.83232e-31	1.29272e-29	7077
BLCA	TIMP2	Tr1	0.366774	4.82609e-15	1.31666e-13	7077
BLCA	TIMP2	iTreg	0.275587	7.01611e-09	5.17509e-08	7077
BLCA	TIMP2	nTreg	-0.25467	9.5391e-08	1.76127e-06	7077
BLCA	TNF	Bcell	-0.0753644	0.119952	0.223716	7124
BLCA	TNF	CD4_T	0.0677056	0.162543	0.228119	7124
BLCA	TNF	CD4_naive	-0.222918	3.29494e-06	2.1378e-05	7124
BLCA	TNF	CD8_T	0.131231	0.00661646	0.0362598	7124
BLCA	TNF	CD8_naive	-0.316483	2.17967e-11	2.58259e-10	7124
BLCA	TNF	Central_memory	0.113164	0.0193309	0.0474066	7124
BLCA	TNF	Cytotoxic	0.405103	2.70266e-18	4.14511e-17	7124
BLCA	TNF	DC	0.222432	3.46517e-06	1.5594e-05	7124
BLCA	TNF	Effector_memory	0.0287433	0.553629	0.697307	7124
BLCA	TNF	Exhausted	0.370753	2.32052e-15	2.74787e-14	7124
BLCA	TNF	Gamma_delta	-0.101704	0.0356493	0.0737449	7124
BLCA	TNF	InfiltrationScore	0.393017	3.18758e-17	2.95086e-16	7124
BLCA	TNF	MAIT	-0.0581045	0.230854	0.515753	7124
BLCA	TNF	Macrophage	0.328048	3.59572e-12	1.97269e-11	7124
BLCA	TNF	Monocyte	0.0128442	0.791284	0.869465	7124
BLCA	TNF	NK	0.322304	8.88494e-12	7.55708e-11	7124
BLCA	TNF	NKT	0.24288	3.76578e-07	1.95151e-06	7124
BLCA	TNF	Neutrophil	-0.29535	4.82746e-10	3.48406e-09	7124
BLCA	TNF	Tfh	0.22485	2.69354e-06	2.0935e-05	7124
BLCA	TNF	Th1	0.366055	5.50259e-15	9.69681e-14	7124
BLCA	TNF	Th17	-0.102829	0.0336483	0.0701469	7124
BLCA	TNF	Th2	0.145836	0.00252035	0.00680863	7124
BLCA	TNF	Tr1	0.28275	2.72418e-09	3.41278e-08	7124
BLCA	TNF	iTreg	0.392489	3.54221e-17	8.8807e-16	7124
BLCA	TNF	nTreg	0.0387072	0.424987	0.575125	7124
BLCA	TNFRSF11B	Bcell	0.0235388	0.627643	0.740916	4982
BLCA	TNFRSF11B	CD4_T	0.0574166	0.236431	0.314954	4982
BLCA	TNFRSF11B	CD4_naive	-0.219333	4.76617e-06	2.9716e-05	4982
BLCA	TNFRSF11B	CD8_T	0.0636352	0.189374	0.383807	4982
BLCA	TNFRSF11B	CD8_naive	-0.0322473	0.506321	0.602938	4982
BLCA	TNFRSF11B	Central_memory	0.135158	0.00514895	0.0154985	4982
BLCA	TNFRSF11B	Cytotoxic	0.210106	1.1985e-05	3.8798e-05	4982
BLCA	TNFRSF11B	DC	0.149567	0.00194146	0.00480574	4982
BLCA	TNFRSF11B	Effector_memory	-0.0342056	0.480836	0.636105	4982
BLCA	TNFRSF11B	Exhausted	0.210294	1.1767e-05	3.7278e-05	4982
BLCA	TNFRSF11B	Gamma_delta	-0.0890364	0.0660468	0.122702	4982
BLCA	TNFRSF11B	InfiltrationScore	0.273355	9.37011e-09	3.82393e-08	4982
BLCA	TNFRSF11B	MAIT	0.0142379	0.769243	0.902218	4982
BLCA	TNFRSF11B	Macrophage	0.264717	2.80101e-08	1.01661e-07	4982
BLCA	TNFRSF11B	Monocyte	0.0500266	0.302371	0.445763	4982
BLCA	TNFRSF11B	NK	0.200533	2.9911e-05	9.8625e-05	4982
BLCA	TNFRSF11B	NKT	0.132931	0.00594033	0.0131457	4982
BLCA	TNFRSF11B	Neutrophil	-0.275351	7.2346e-09	4.66536e-08	4982
BLCA	TNFRSF11B	Tfh	0.149233	0.00198789	0.0076896	4982
BLCA	TNFRSF11B	Th1	0.139473	0.00388015	0.0087337	4982
BLCA	TNFRSF11B	Th17	-0.0222406	0.646745	0.738954	4982
BLCA	TNFRSF11B	Th2	0.22762	2.0114e-06	1.0513e-05	4982
BLCA	TNFRSF11B	Tr1	0.222837	3.32283e-06	2.7597e-05	4982
BLCA	TNFRSF11B	iTreg	0.251219	1.43612e-07	8.28821e-07	4982
BLCA	TNFRSF11B	nTreg	-0.0079586	0.869749	0.921394	4982
BRCA	FGF2	Bcell	-0.131574	4.08078e-06	1.0527e-05	2247
BRCA	FGF2	CD4_T	0.441179	3.59352e-59	1.11046e-57	2247
BRCA	FGF2	CD4_naive	-0.0595405	0.0377403	0.300325	2247
BRCA	FGF2	CD8_T	0.0619501	0.0306253	0.0490283	2247
BRCA	FGF2	CD8_naive	-0.22826	7.33873e-16	4.61931e-15	2247
BRCA	FGF2	Central_memory	0.245886	3.13137e-18	3.01117e-17	2247
BRCA	FGF2	Cytotoxic	0.220098	7.914e-15	4.25571e-14	2247
BRCA	FGF2	DC	-0.261887	1.49885e-20	1.37056e-19	2247
BRCA	FGF2	Effector_memory	-0.327373	8.08976e-32	5.85402e-30	2247
BRCA	FGF2	Exhausted	-0.00886393	0.757292	0.797732	2247
BRCA	FGF2	Gamma_delta	0.217746	1.5435e-14	1.03364e-13	2247
BRCA	FGF2	InfiltrationScore	-0.0334723	0.243087	0.298746	2247
BRCA	FGF2	MAIT	0.189266	2.7599e-11	4.12795e-10	2247
BRCA	FGF2	Macrophage	-0.323822	3.94122e-31	1.2788e-29	2247
BRCA	FGF2	Monocyte	-0.293718	1.16154e-25	2.89193e-24	2247
BRCA	FGF2	NK	0.454239	4.79634e-63	1.15416e-61	2247
BRCA	FGF2	NKT	0.375084	5.58217e-42	1.5033e-40	2247
BRCA	FGF2	Neutrophil	-0.241865	1.13077e-17	8.54852e-17	2247
BRCA	FGF2	Tfh	0.381891	1.41612e-43	2.03341e-42	2247
BRCA	FGF2	Th1	0.00675143	0.81391	0.849597	2247
BRCA	FGF2	Th17	-0.00658445	0.818431	0.848548	2247
BRCA	FGF2	Th2	0.321953	8.99075e-31	1.24736e-28	2247
BRCA	FGF2	Tr1	-0.242499	9.25119e-18	1.72079e-16	2247
BRCA	FGF2	iTreg	-0.0708431	0.0133991	0.0207665	2247
BRCA	FGF2	nTreg	-0.190171	2.21219e-11	1.16195e-10	2247
BRCA	ICAM1	Bcell	0.136503	1.74032e-06	4.71643e-06	3383
BRCA	ICAM1	CD4_T	0.225754	1.53804e-15	5.97772e-15	3383
BRCA	ICAM1	CD4_naive	-0.0955437	0.000841783	0.0215722	3383
BRCA	ICAM1	CD8_T	0.275318	1.26184e-22	2.02427e-21	3383
BRCA	ICAM1	CD8_naive	-0.431689	1.84896e-56	2.56521e-54	3383
BRCA	ICAM1	Central_memory	0.239339	2.50347e-17	2.19731e-16	3383
BRCA	ICAM1	Cytotoxic	0.504529	1.21891e-79	3.83736e-78	3383
BRCA	ICAM1	DC	0.203366	7.76998e-13	3.5744e-12	3383
BRCA	ICAM1	Effector_memory	-0.0151986	0.596172	0.659909	3383
BRCA	ICAM1	Exhausted	0.494833	3.19621e-76	2.60317e-74	3383
BRCA	ICAM1	Gamma_delta	0.172184	1.46422e-09	5.82703e-09	3383
BRCA	ICAM1	InfiltrationScore	0.468999	1.24145e-67	5.83511e-66	3383
BRCA	ICAM1	MAIT	-0.235248	8.89357e-17	3.96701e-15	3383
BRCA	ICAM1	Macrophage	0.167408	4.15139e-09	1.59987e-08	3383
BRCA	ICAM1	Monocyte	-0.0495891	0.083641	0.128224	3383
BRCA	ICAM1	NK	0.383862	4.80676e-44	6.20652e-43	3383
BRCA	ICAM1	NKT	0.0953103	0.000866952	0.00156137	3383
BRCA	ICAM1	Neutrophil	-0.50109	2.04748e-78	6.16604e-77	3383
BRCA	ICAM1	Tfh	0.383233	6.7917e-44	9.86488e-43	3383
BRCA	ICAM1	Th1	0.436363	8.75602e-58	2.90668e-56	3383
BRCA	ICAM1	Th17	-0.291064	3.28765e-25	2.9886e-24	3383
BRCA	ICAM1	Th2	0.0674619	0.0185388	0.0375272	3383
BRCA	ICAM1	Tr1	0.0590439	0.0393692	0.0633593	3383
BRCA	ICAM1	iTreg	0.380522	2.98553e-43	7.38744e-42	3383
BRCA	ICAM1	nTreg	0.0958031	0.000814603	0.00168925	3383
BRCA	ICAM3	Bcell	0.274594	1.64399e-22	2.52074e-21	3385
BRCA	ICAM3	CD4_T	0.301822	4.51788e-27	3.25523e-26	3385
BRCA	ICAM3	CD4_naive	-0.0680996	0.0174547	0.18628	3385
BRCA	ICAM3	CD8_T	0.638173	2.83821e-140	5.88622e-138	3385
BRCA	ICAM3	CD8_naive	-0.280065	2.18468e-23	2.42545e-22	3385
BRCA	ICAM3	Central_memory	0.344003	3.66395e-35	9.0773e-34	3385
BRCA	ICAM3	Cytotoxic	0.564615	1.74385e-103	7.47994e-102	3385
BRCA	ICAM3	DC	-0.125708	1.0818e-05	2.4199e-05	3385
BRCA	ICAM3	Effector_memory	-0.0340194	0.235466	0.298818	3385
BRCA	ICAM3	Exhausted	0.375676	4.07047e-42	1.13572e-40	3385
BRCA	ICAM3	Gamma_delta	0.442217	1.79416e-59	6.68391e-57	3385
BRCA	ICAM3	InfiltrationScore	0.365446	8.75217e-40	2.02843e-38	3385
BRCA	ICAM3	MAIT	-0.0871669	0.00232846	0.00609203	3385
BRCA	ICAM3	Macrophage	-0.073129	0.0106802	0.0178169	3385
BRCA	ICAM3	Monocyte	-0.367713	2.70649e-40	1.58274e-38	3385
BRCA	ICAM3	NK	0.49531	2.18275e-76	7.46774e-75	3385
BRCA	ICAM3	NKT	0.0530955	0.0639644	0.0884318	3385
BRCA	ICAM3	Neutrophil	-0.566763	1.9786e-104	8.17321e-103	3385
BRCA	ICAM3	Tfh	0.57428	8.56848e-108	4.34187e-106	3385
BRCA	ICAM3	Th1	0.479302	5.70858e-71	2.35327e-69	3385
BRCA	ICAM3	Th17	-0.445193	2.41251e-60	1.16946e-58	3385
BRCA	ICAM3	Th2	-0.00399725	0.889165	0.921819	3385
BRCA	ICAM3	Tr1	0.0958319	0.000811633	0.0018282	3385
BRCA	ICAM3	iTreg	0.172093	1.49394e-09	4.91876e-09	3385
BRCA	ICAM3	nTreg	-0.196174	4.96352e-12	2.79695e-11	3385
BRCA	ITGA2	Bcell	-0.182543	1.37908e-10	5.98297e-10	3673
BRCA	ITGA2	CD4_T	0.120476	2.4907e-05	4.8062e-05	3673
BRCA	ITGA2	CD4_naive	0.0300567	0.294576	0.749841	3673
BRCA	ITGA2	CD8_T	-0.159887	2.01832e-08	7.87635e-08	3673
BRCA	ITGA2	CD8_naive	0.129524	5.76506e-06	1.5062e-05	3673
BRCA	ITGA2	Central_memory	0.165666	6.02687e-09	2.20441e-08	3673
BRCA	ITGA2	Cytotoxic	-0.158182	2.85956e-08	8.74386e-08	3673
BRCA	ITGA2	DC	-0.0962115	0.000773458	0.00139436	3673
BRCA	ITGA2	Effector_memory	-0.146053	3.064e-07	1.03023e-06	3673
BRCA	ITGA2	Exhausted	-0.244312	5.19125e-18	3.66815e-17	3673
BRCA	ITGA2	Gamma_delta	-0.116763	4.4111e-05	0.000104632	3673
BRCA	ITGA2	InfiltrationScore	-0.222022	4.55574e-15	2.47163e-14	3673
BRCA	ITGA2	MAIT	0.133173	3.105e-06	1.574e-05	3673
BRCA	ITGA2	Macrophage	-0.0986274	0.000566944	0.00115836	3673
BRCA	ITGA2	Monocyte	-0.0483762	0.0914927	0.138698	3673
BRCA	ITGA2	NK	-0.0355656	0.214846	0.259209	3673
BRCA	ITGA2	NKT	0.0275637	0.336469	0.39746	3673
BRCA	ITGA2	Neutrophil	0.0267257	0.351373	0.427963	3673
BRCA	ITGA2	Tfh	-0.0346878	0.226386	0.280466	3673
BRCA	ITGA2	Th1	-0.173233	1.16015e-09	4.65293e-09	3673
BRCA	ITGA2	Th17	0.25798	5.71869e-20	3.65448e-19	3673
BRCA	ITGA2	Th2	0.127604	7.9303e-06	3.6886e-05	3673
BRCA	ITGA2	Tr1	0.0254736	0.374404	0.456394	3673
BRCA	ITGA2	iTreg	0.00252782	0.929773	0.941473	3673
BRCA	ITGA2	nTreg	0.0681095	0.0174383	0.0288232	3673
BRCA	LCP1	Bcell	0.275166	1.33399e-22	2.05954e-21	3936
BRCA	LCP1	CD4_T	0.296855	3.34552e-26	2.3104e-25	3936
BRCA	LCP1	CD4_naive	-0.0691247	0.0158283	0.174202	3936
BRCA	LCP1	CD8_T	0.409707	1.67772e-50	6.83214e-49	3936
BRCA	LCP1	CD8_naive	-0.313799	3.07322e-29	5.17788e-28	3936
BRCA	LCP1	Central_memory	0.49	1.47184e-74	9.73977e-73	3936
BRCA	LCP1	Cytotoxic	0.53688	7.03392e-92	2.58214e-90	3936
BRCA	LCP1	DC	0.171224	1.80988e-09	6.02404e-09	3936
BRCA	LCP1	Effector_memory	-0.137874	1.3659e-06	4.24041e-06	3936
BRCA	LCP1	Exhausted	0.382842	8.41489e-44	2.50789e-42	3936
BRCA	LCP1	Gamma_delta	0.14213	6.34104e-07	1.88926e-06	3936
BRCA	LCP1	InfiltrationScore	0.46068	5.09051e-65	2.24083e-63	3936
BRCA	LCP1	MAIT	-0.0864492	0.00253091	0.00657128	3936
BRCA	LCP1	Macrophage	0.0889562	0.00188656	0.00356724	3936
BRCA	LCP1	Monocyte	-0.180881	2.03369e-10	1.31253e-09	3936
BRCA	LCP1	NK	0.403874	5.3983e-49	8.28989e-48	3936
BRCA	LCP1	NKT	-0.0870442	0.00236197	0.00403155	3936
BRCA	LCP1	Neutrophil	-0.603452	1.03701e-121	5.2416e-120	3936
BRCA	LCP1	Tfh	0.495604	1.72443e-76	5.25612e-75	3936
BRCA	LCP1	Th1	0.520878	1.16494e-85	5.91796e-84	3936
BRCA	LCP1	Th17	-0.437539	4.03367e-58	1.81533e-56	3936
BRCA	LCP1	Th2	0.0592767	0.0385984	0.0708783	3936
BRCA	LCP1	Tr1	0.242551	9.09848e-18	1.69633e-16	3936
BRCA	LCP1	iTreg	0.5019	1.05642e-78	8.85504e-77	3936
BRCA	LCP1	nTreg	0.0804969	0.00493863	0.00900565	3936
BRCA	MMP1	Bcell	0.18011	2.43261e-10	1.02442e-09	4312
BRCA	MMP1	CD4_T	-0.23089	3.34282e-16	1.34846e-15	4312
BRCA	MMP1	CD4_naive	-0.0544701	0.057373	0.376582	4312
BRCA	MMP1	CD8_T	0.0283841	0.32228	0.397774	4312
BRCA	MMP1	CD8_naive	-0.0439544	0.125234	0.169516	4312
BRCA	MMP1	Central_memory	0.050407	0.0786607	0.111761	4312
BRCA	MMP1	Cytotoxic	0.149821	1.49615e-07	4.2674e-07	4312
BRCA	MMP1	DC	0.502347	7.32766e-79	1.22842e-75	4312
BRCA	MMP1	Effector_memory	0.227357	9.59105e-16	9.49613e-15	4312
BRCA	MMP1	Exhausted	0.29977	1.03801e-26	1.37199e-25	4312
BRCA	MMP1	Gamma_delta	-0.210569	1.13052e-13	6.93587e-13	4312
BRCA	MMP1	InfiltrationScore	0.344821	2.47751e-35	4.79231e-34	4312
BRCA	MMP1	MAIT	-0.241966	1.09505e-17	5.9862e-16	4312
BRCA	MMP1	Macrophage	0.401509	2.16402e-48	2.6068e-46	4312
BRCA	MMP1	Monocyte	0.307258	4.82664e-28	1.40112e-26	4312
BRCA	MMP1	NK	-0.165118	6.77118e-09	1.69423e-08	4312
BRCA	MMP1	NKT	-0.218541	1.23254e-14	5.64036e-14	4312
BRCA	MMP1	Neutrophil	-0.164148	8.31279e-09	3.22337e-08	4312
BRCA	MMP1	Tfh	-0.107462	0.000171654	0.000347576	4312
BRCA	MMP1	Th1	0.290241	4.5306e-25	6.02791e-24	4312
BRCA	MMP1	Th17	-0.228521	6.78941e-16	3.2692e-15	4312
BRCA	MMP1	Th2	-0.116444	4.6296e-05	0.000183116	4312
BRCA	MMP1	Tr1	0.293331	1.35265e-25	8.27091e-24	4312
BRCA	MMP1	iTreg	0.440027	7.75118e-59	3.42704e-57	4312
BRCA	MMP1	nTreg	0.310011	1.52756e-28	5.57711e-27	4312
BRCA	MMP10	Bcell	-0.0883383	0.00202964	0.00368536	4319
BRCA	MMP10	CD4_T	-0.0186585	0.515327	0.567859	4319
BRCA	MMP10	CD4_naive	0.0164719	0.565755	0.888129	4319
BRCA	MMP10	CD8_T	-0.0348243	0.224563	0.291022	4319
BRCA	MMP10	CD8_naive	0.191349	1.65618e-11	7.37924e-11	4319
BRCA	MMP10	Central_memory	0.0520597	0.0693333	0.0996483	4319
BRCA	MMP10	Cytotoxic	-0.103234	0.000307608	0.000611356	4319
BRCA	MMP10	DC	0.06778	0.017991	0.0270375	4319
BRCA	MMP10	Effector_memory	0.0344426	0.229688	0.292723	4319
BRCA	MMP10	Exhausted	-0.0844117	0.00319635	0.00549487	4319
BRCA	MMP10	Gamma_delta	-0.0749264	0.00889895	0.0150944	4319
BRCA	MMP10	InfiltrationScore	-0.0255361	0.373231	0.436529	4319
BRCA	MMP10	MAIT	-0.038621	0.177985	0.258615	4319
BRCA	MMP10	Macrophage	0.108626	0.000145644	0.000322502	4319
BRCA	MMP10	Monocyte	0.0440954	0.124026	0.181115	4319
BRCA	MMP10	NK	-0.103496	0.000296863	0.0005171	4319
BRCA	MMP10	NKT	-0.0858369	0.00271619	0.00460023	4319
BRCA	MMP10	Neutrophil	-0.0723488	0.0115474	0.0202404	4319
BRCA	MMP10	Tfh	-0.0869889	0.00237723	0.00416938	4319
BRCA	MMP10	Th1	-0.0393766	0.169641	0.220871	4319
BRCA	MMP10	Th17	0.095213	0.000877644	0.00154467	4319
BRCA	MMP10	Th2	0.0415342	0.147429	0.222259	4319
BRCA	MMP10	Tr1	0.128337	7.02504e-06	2.2583e-05	4319
BRCA	MMP10	iTreg	0.10979	0.000123369	0.000248182	4319
BRCA	MMP10	nTreg	0.0921372	0.00128584	0.00258079	4319
BRCA	MMP12	Bcell	0.191803	1.48059e-11	7.19444e-11	4321
BRCA	MMP12	CD4_T	-0.0323405	0.259398	0.30801	4321
BRCA	MMP12	CD4_naive	-0.039448	0.168868	0.617769	4321
BRCA	MMP12	CD8_T	0.0779621	0.00648458	0.0118483	4321
BRCA	MMP12	CD8_naive	-0.231742	2.58596e-16	1.68682e-15	4321
BRCA	MMP12	Central_memory	0.0840028	0.00334774	0.0060678	4321
BRCA	MMP12	Cytotoxic	0.251645	4.7799e-19	3.48522e-18	4321
BRCA	MMP12	DC	0.553738	8.3872e-99	4.21813e-95	4321
BRCA	MMP12	Effector_memory	0.0158422	0.580703	0.645557	4321
BRCA	MMP12	Exhausted	0.318389	4.26615e-30	6.84387e-29	4321
BRCA	MMP12	Gamma_delta	-0.111379	9.8098e-05	0.000221337	4321
BRCA	MMP12	InfiltrationScore	0.440491	5.68874e-59	2.17982e-57	4321
BRCA	MMP12	MAIT	-0.158701	2.57287e-08	2.04741e-07	4321
BRCA	MMP12	Macrophage	0.226201	1.34857e-15	1.03349e-14	4321
BRCA	MMP12	Monocyte	0.188799	3.09216e-11	2.20663e-10	4321
BRCA	MMP12	NK	0.0872958	0.00229372	0.00364046	4321
BRCA	MMP12	NKT	-0.0589093	0.0398209	0.0571749	4321
BRCA	MMP12	Neutrophil	-0.263328	9.09245e-21	8.06138e-20	4321
BRCA	MMP12	Tfh	0.0983855	0.000585031	0.00111092	4321
BRCA	MMP12	Th1	0.290892	3.51658e-25	4.71935e-24	4321
BRCA	MMP12	Th17	-0.318215	4.6018e-30	5.44555e-29	4321
BRCA	MMP12	Th2	0.0600585	0.0361024	0.0670066	4321
BRCA	MMP12	Tr1	0.154422	6.08513e-08	2.64052e-07	4321
BRCA	MMP12	iTreg	0.353125	4.37751e-37	8.28432e-36	4321
BRCA	MMP12	nTreg	0.172827	1.26961e-09	5.44812e-09	4321
BRCA	MMP13	Bcell	-0.0542669	0.0583102	0.082503	4322
BRCA	MMP13	CD4_T	-0.165965	5.65489e-09	1.45528e-08	4322
BRCA	MMP13	CD4_naive	-0.0174734	0.542366	0.878413	4322
BRCA	MMP13	CD8_T	-0.11799	3.6589e-05	9.3815e-05	4322
BRCA	MMP13	CD8_naive	0.241875	1.12737e-17	8.26506e-17	4322
BRCA	MMP13	Central_memory	0.0119534	0.676854	0.731625	4322
BRCA	MMP13	Cytotoxic	-0.0520815	0.0692166	0.0966294	4322
BRCA	MMP13	DC	0.333951	4.07052e-33	1.11562e-31	4322
BRCA	MMP13	Effector_memory	0.202762	9.10245e-13	6.20515e-12	4322
BRCA	MMP13	Exhausted	0.045834	0.109866	0.145866	4322
BRCA	MMP13	Gamma_delta	-0.205697	4.196e-13	2.43962e-12	4322
BRCA	MMP13	InfiltrationScore	0.149528	1.58295e-07	4.41054e-07	4322
BRCA	MMP13	MAIT	-0.126887	8.9221e-06	4.1119e-05	4322
BRCA	MMP13	Macrophage	0.390331	1.31553e-45	1.21397e-43	4322
BRCA	MMP13	Monocyte	0.318362	4.31669e-30	1.41893e-28	4322
BRCA	MMP13	NK	-0.259706	3.17407e-20	1.55209e-19	4322
BRCA	MMP13	NKT	-0.154052	6.54767e-08	1.78991e-07	4322
BRCA	MMP13	Neutrophil	-0.0862663	0.00258502	0.00505471	4322
BRCA	MMP13	Tfh	-0.175968	6.27912e-10	2.1457e-09	4322
BRCA	MMP13	Th1	0.037391	0.192214	0.246746	4322
BRCA	MMP13	Th17	0.00796379	0.781278	0.816635	4322
BRCA	MMP13	Th2	-0.112321	8.5516e-05	0.000316935	4322
BRCA	MMP13	Tr1	0.318434	4.18401e-30	5.22793e-28	4322
BRCA	MMP13	iTreg	0.290041	4.8966e-25	4.98002e-24	4322
BRCA	MMP13	nTreg	0.21068	1.09677e-13	7.4114e-13	4322
BRCA	MMP14	Bcell	-0.0916666	0.00136188	0.00253207	4323
BRCA	MMP14	CD4_T	0.0088201	0.758455	0.7936	4323
BRCA	MMP14	CD4_naive	-0.0150771	0.599112	0.901393	4323
BRCA	MMP14	CD8_T	-0.0404266	0.158536	0.214737	4323
BRCA	MMP14	CD8_naive	0.105061	0.000239699	0.000514954	4323
BRCA	MMP14	Central_memory	-0.00251456	0.930141	0.944412	4323
BRCA	MMP14	Cytotoxic	0.0821492	0.004119	0.00704608	4323
BRCA	MMP14	DC	0.266579	2.91227e-21	2.85647e-20	4323
BRCA	MMP14	Effector_memory	0.0184316	0.520448	0.587996	4323
BRCA	MMP14	Exhausted	0.0664315	0.0204151	0.0311271	4323
BRCA	MMP14	Gamma_delta	-0.104375	0.000263347	0.000561441	4323
BRCA	MMP14	InfiltrationScore	0.275773	1.06814e-22	1.02421e-21	4323
BRCA	MMP14	MAIT	-0.117025	4.2392e-05	0.000169071	4323
BRCA	MMP14	Macrophage	0.347171	8.00329e-36	3.74424e-34	4323
BRCA	MMP14	Monocyte	0.30586	8.6172e-28	2.46589e-26	4323
BRCA	MMP14	NK	-0.0360888	0.208171	0.251826	4323
BRCA	MMP14	NKT	0.139187	1.08049e-06	2.63949e-06	4323
BRCA	MMP14	Neutrophil	-0.217012	1.89809e-14	1.16414e-13	4323
BRCA	MMP14	Tfh	0.00327743	0.909028	0.925404	4323
BRCA	MMP14	Th1	0.0314569	0.272648	0.335897	4323
BRCA	MMP14	Th17	-0.0564183	0.0490063	0.0683012	4323
BRCA	MMP14	Th2	-0.0113321	0.692772	0.771379	4323
BRCA	MMP14	Tr1	0.27212	4.03368e-22	1.50828e-20	4323
BRCA	MMP14	iTreg	0.221615	5.12273e-15	2.61911e-14	4323
BRCA	MMP14	nTreg	0.0799398	0.0052466	0.00952322	4323
BRCA	MMP2	Bcell	-0.209078	1.6945e-13	1.01878e-12	4313
BRCA	MMP2	CD4_T	0.243338	7.08384e-18	3.11352e-17	4313
BRCA	MMP2	CD4_naive	-0.0841536	0.00329116	0.0593796	4313
BRCA	MMP2	CD8_T	-0.00797003	0.781111	0.825061	4313
BRCA	MMP2	CD8_naive	0.0565605	0.0484381	0.0720731	4313
BRCA	MMP2	Central_memory	0.17377	1.02912e-09	4.07614e-09	4313
BRCA	MMP2	Cytotoxic	0.239666	2.25957e-17	1.4649e-16	4313
BRCA	MMP2	DC	0.0689534	0.0160905	0.0243268	4313
BRCA	MMP2	Effector_memory	-0.137652	1.42084e-06	4.39942e-06	4313
BRCA	MMP2	Exhausted	0.0759777	0.00798451	0.0129756	4313
BRCA	MMP2	Gamma_delta	0.114782	5.9434e-05	0.00013835	4313
BRCA	MMP2	InfiltrationScore	0.228885	6.09295e-16	3.53437e-15	4313
BRCA	MMP2	MAIT	0.0239951	0.402769	0.501455	4313
BRCA	MMP2	Macrophage	0.184959	7.79007e-11	3.63266e-10	4313
BRCA	MMP2	Monocyte	0.0708524	0.0133869	0.0252797	4313
BRCA	MMP2	NK	0.238081	3.70603e-17	1.54838e-16	4313
BRCA	MMP2	NKT	0.289412	6.25112e-25	5.50585e-24	4313
BRCA	MMP2	Neutrophil	-0.34854	4.12527e-36	6.20703e-35	4313
BRCA	MMP2	Tfh	0.247687	1.74866e-18	1.05766e-17	4313
BRCA	MMP2	Th1	0.0291739	0.308993	0.375499	4313
BRCA	MMP2	Th17	0.00415933	0.884702	0.905497	4313
BRCA	MMP2	Th2	0.0226216	0.430239	0.533443	4313
BRCA	MMP2	Tr1	0.12683	9.00673e-06	2.8404e-05	4313
BRCA	MMP2	iTreg	0.12898	6.31301e-06	1.4596e-05	4313
BRCA	MMP2	nTreg	-0.0949175	0.00091089	0.00187385	4313
BRCA	MMP3	Bcell	0.0586334	0.0407606	0.0596567	4314
BRCA	MMP3	CD4_T	0.198706	2.60386e-12	8.35703e-12	4314
BRCA	MMP3	CD4_naive	-0.0851304	0.00294534	0.0549133	4314
BRCA	MMP3	CD8_T	0.186331	5.61169e-11	2.95215e-10	4314
BRCA	MMP3	CD8_naive	-0.0111157	0.698349	0.747828	4314
BRCA	MMP3	Central_memory	0.282203	9.80541e-24	1.44404e-22	4314
BRCA	MMP3	Cytotoxic	0.238609	3.14368e-17	2.01534e-16	4314
BRCA	MMP3	DC	0.106149	0.00020623	0.000400612	4314
BRCA	MMP3	Effector_memory	-0.0467575	0.10288	0.1447	4314
BRCA	MMP3	Exhausted	0.122454	1.8242e-05	4.1425e-05	4314
BRCA	MMP3	Gamma_delta	0.0859532	0.00268009	0.00496028	4314
BRCA	MMP3	InfiltrationScore	0.21775	1.54156e-14	8.04241e-14	4314
BRCA	MMP3	MAIT	-0.0663927	0.0204888	0.0410653	4314
BRCA	MMP3	Macrophage	0.0793066	0.00561754	0.00981825	4314
BRCA	MMP3	Monocyte	-0.033125	0.248013	0.327897	4314
BRCA	MMP3	NK	0.140387	8.70682e-07	1.87372e-06	4314
BRCA	MMP3	NKT	0.106831	0.000187537	0.000365216	4314
BRCA	MMP3	Neutrophil	-0.373056	1.64052e-41	2.79208e-40	4314
BRCA	MMP3	Tfh	0.260016	2.85406e-20	1.88803e-19	4314
BRCA	MMP3	Th1	0.236747	5.60342e-17	4.38614e-16	4314
BRCA	MMP3	Th17	-0.122414	1.836e-05	3.8895e-05	4314
BRCA	MMP3	Th2	0.0789537	0.00583433	0.0137096	4314
BRCA	MMP3	Tr1	0.14604	3.07167e-07	1.21091e-06	4314
BRCA	MMP3	iTreg	0.242882	8.1899e-18	5.1859e-17	4314
BRCA	MMP3	nTreg	0.0489242	0.0878745	0.125338	4314
BRCA	MMP9	Bcell	0.21309	5.66212e-14	3.56733e-13	4318
BRCA	MMP9	CD4_T	0.00112615	0.968681	0.974446	4318
BRCA	MMP9	CD4_naive	-0.0163454	0.568742	0.888582	4318
BRCA	MMP9	CD8_T	0.146489	2.82257e-07	9.49367e-07	4318
BRCA	MMP9	CD8_naive	-0.0889692	0.00188364	0.00357281	4318
BRCA	MMP9	Central_memory	0.0454905	0.112557	0.154018	4318
BRCA	MMP9	Cytotoxic	0.266483	3.01254e-21	2.53677e-20	4318
BRCA	MMP9	DC	0.424797	1.52303e-54	3.73644e-52	4318
BRCA	MMP9	Effector_memory	0.0481976	0.0926973	0.131871	4318
BRCA	MMP9	Exhausted	0.347407	7.14208e-36	1.53665e-34	4318
BRCA	MMP9	Gamma_delta	-0.0239938	0.402795	0.471764	4318
BRCA	MMP9	InfiltrationScore	0.495972	1.28476e-76	7.28042e-75	4318
BRCA	MMP9	MAIT	-0.150616	1.28307e-07	8.72893e-07	4318
BRCA	MMP9	Macrophage	0.356315	8.98997e-38	4.8747e-36	4318
BRCA	MMP9	Monocyte	0.254501	1.84864e-19	2.92596e-18	4318
BRCA	MMP9	NK	0.0552133	0.0540509	0.0724412	4318
BRCA	MMP9	NKT	-0.104913	0.000244628	0.000470116	4318
BRCA	MMP9	Neutrophil	-0.321149	1.2797e-30	1.67494e-29	4318
BRCA	MMP9	Tfh	0.092245	0.00126897	0.0023142	4318
BRCA	MMP9	Th1	0.261707	1.59478e-20	1.61786e-19	4318
BRCA	MMP9	Th17	-0.375375	4.78081e-42	1.0782e-40	4318
BRCA	MMP9	Th2	-0.0766343	0.00745699	0.0169505	4318
BRCA	MMP9	Tr1	0.328653	4.54865e-32	7.14885e-30	4318
BRCA	MMP9	iTreg	0.332516	7.86514e-33	1.23323e-31	4318
BRCA	MMP9	nTreg	0.0319408	0.265336	0.331496	4318
BRCA	PECAM1	Bcell	-0.0723191	0.0115816	0.0186554	5175
BRCA	PECAM1	CD4_T	0.464666	2.90959e-66	1.18968e-64	5175
BRCA	PECAM1	CD4_naive	-0.104376	0.000263329	0.00916503	5175
BRCA	PECAM1	CD8_T	0.276467	8.28071e-23	1.34558e-21	5175
BRCA	PECAM1	CD8_naive	-0.21172	8.25468e-14	4.44366e-13	5175
BRCA	PECAM1	Central_memory	0.347268	7.63954e-36	1.94292e-34	5175
BRCA	PECAM1	Cytotoxic	0.49596	1.29644e-76	3.91012e-75	5175
BRCA	PECAM1	DC	-0.163191	1.01657e-08	3.14814e-08	5175
BRCA	PECAM1	Effector_memory	-0.282887	7.57914e-24	2.00091e-22	5175
BRCA	PECAM1	Exhausted	0.190511	2.03509e-11	8.37217e-11	5175
BRCA	PECAM1	Gamma_delta	0.459425	1.2441e-64	7.36106e-62	5175
BRCA	PECAM1	InfiltrationScore	0.229598	4.92542e-16	2.87119e-15	5175
BRCA	PECAM1	MAIT	0.235699	7.74299e-17	3.48469e-15	5175
BRCA	PECAM1	Macrophage	-0.128601	6.72372e-06	1.7658e-05	5175
BRCA	PECAM1	Monocyte	-0.333612	4.75783e-33	1.87673e-31	5175
BRCA	PECAM1	NK	0.601178	1.42079e-120	1.36756e-118	5175
BRCA	PECAM1	NKT	0.381552	1.70364e-43	5.06235e-42	5175
BRCA	PECAM1	Neutrophil	-0.501209	1.85828e-78	5.60464e-77	5175
BRCA	PECAM1	Tfh	0.589159	1.02761e-114	5.75835e-113	5175
BRCA	PECAM1	Th1	0.187006	4.77141e-11	2.22294e-10	5175
BRCA	PECAM1	Th17	-0.218633	1.20079e-14	5.29164e-14	5175
BRCA	PECAM1	Th2	0.141183	7.53669e-07	4.30848e-06	5175
BRCA	PECAM1	Tr1	-0.0986764	0.000563342	0.00130411	5175
BRCA	PECAM1	iTreg	-0.0284988	0.320328	0.378216	5175
BRCA	PECAM1	nTreg	-0.365818	7.22237e-40	1.18124e-37	5175
BRCA	SERPINE1	Bcell	-0.134956	2.28154e-06	6.08561e-06	5054
BRCA	SERPINE1	CD4_T	0.200416	1.67652e-12	5.44944e-12	5054
BRCA	SERPINE1	CD4_naive	-0.0772774	0.0069708	0.102734	5054
BRCA	SERPINE1	CD8_T	0.00448495	0.875746	0.902946	5054
BRCA	SERPINE1	CD8_naive	0.0762421	0.00776821	0.013414	5054
BRCA	SERPINE1	Central_memory	0.167125	4.41136e-09	1.63582e-08	5054
BRCA	SERPINE1	Cytotoxic	0.107209	0.000177859	0.000363543	5054
BRCA	SERPINE1	DC	0.077044	0.00714389	0.0113806	5054
BRCA	SERPINE1	Effector_memory	-0.188973	2.9642e-11	1.67033e-10	5054
BRCA	SERPINE1	Exhausted	0.0504711	0.0782809	0.107376	5054
BRCA	SERPINE1	Gamma_delta	0.0568593	0.0472614	0.0701925	5054
BRCA	SERPINE1	InfiltrationScore	0.0914459	0.00139895	0.0025076	5054
BRCA	SERPINE1	MAIT	0.060045	0.0361442	0.067064	5054
BRCA	SERPINE1	Macrophage	0.127942	7.50009e-06	1.9564e-05	5054
BRCA	SERPINE1	Monocyte	0.0561971	0.0499016	0.081536	5054
BRCA	SERPINE1	NK	0.0558622	0.0512832	0.0689799	5054
BRCA	SERPINE1	NKT	0.119194	3.0397e-05	6.4477e-05	5054
BRCA	SERPINE1	Neutrophil	-0.269655	9.77543e-22	9.01662e-21	5054
BRCA	SERPINE1	Tfh	0.248195	1.48254e-18	9.02123e-18	5054
BRCA	SERPINE1	Th1	0.000778265	0.978353	0.983192	5054
BRCA	SERPINE1	Th17	-0.0465304	0.104565	0.137154	5054
BRCA	SERPINE1	Th2	-0.020068	0.484101	0.584378	5054
BRCA	SERPINE1	Tr1	0.137328	1.50478e-06	5.36541e-06	5054
BRCA	SERPINE1	iTreg	0.0979084	0.000622302	0.00115328	5054
BRCA	SERPINE1	nTreg	-0.105668	0.000220442	0.000496045	5054
BRCA	SPP1	Bcell	-0.0527962	0.065479	0.0916724	6696
BRCA	SPP1	CD4_T	-0.219362	9.76146e-15	3.62042e-14	6696
BRCA	SPP1	CD4_naive	-0.00767728	0.788957	0.956641	6696
BRCA	SPP1	CD8_T	-0.227671	8.73822e-16	7.74391e-15	6696
BRCA	SPP1	CD8_naive	0.00600353	0.834207	0.864637	6696
BRCA	SPP1	Central_memory	-0.186171	5.83133e-11	2.65765e-10	6696
BRCA	SPP1	Cytotoxic	-0.0180913	0.528179	0.591976	6696
BRCA	SPP1	DC	0.555046	2.34174e-99	1.57029e-95	6696
BRCA	SPP1	Effector_memory	0.128335	7.02744e-06	1.9869e-05	6696
BRCA	SPP1	Exhausted	0.183962	9.86875e-11	3.81935e-10	6696
BRCA	SPP1	Gamma_delta	-0.306088	7.84124e-28	2.24384e-26	6696
BRCA	SPP1	InfiltrationScore	0.439851	8.71478e-59	3.32037e-57	6696
BRCA	SPP1	MAIT	-0.180985	1.9853e-10	2.46532e-09	6696
BRCA	SPP1	Macrophage	0.676393	1.09742e-163	4.41538e-160	6696
BRCA	SPP1	Monocyte	0.529531	5.55603e-89	3.60551e-86	6696
BRCA	SPP1	NK	-0.215644	2.78557e-14	9.90934e-14	6696
BRCA	SPP1	NKT	-0.0820048	0.00418537	0.00692525	6696
BRCA	SPP1	Neutrophil	0.00933411	0.744854	0.794793	6696
BRCA	SPP1	Tfh	-0.242824	8.34276e-18	4.85482e-17	6696
BRCA	SPP1	Th1	0.0118805	0.678716	0.733244	6696
BRCA	SPP1	Th17	-0.0316534	0.269662	0.323269	6696
BRCA	SPP1	Th2	-0.059702	0.0372229	0.0687979	6696
BRCA	SPP1	Tr1	0.27062	6.92102e-22	2.51318e-20	6696
BRCA	SPP1	iTreg	0.199189	2.30055e-12	9.55017e-12	6696
BRCA	SPP1	nTreg	0.160059	1.9482e-08	7.30646e-08	6696
BRCA	TIMP2	Bcell	-0.222199	4.32873e-15	3.12343e-14	7077
BRCA	TIMP2	CD4_T	0.196605	4.44988e-12	1.40377e-11	7077
BRCA	TIMP2	CD4_naive	-0.0727547	0.0110888	0.139683	7077
BRCA	TIMP2	CD8_T	-0.173738	1.03643e-09	4.69804e-09	7077
BRCA	TIMP2	CD8_naive	0.0175562	0.540453	0.605402	7077
BRCA	TIMP2	Central_memory	0.130226	5.12407e-06	1.3489e-05	7077
BRCA	TIMP2	Cytotoxic	0.1694	2.69753e-09	9.12191e-09	7077
BRCA	TIMP2	DC	0.097743	0.000635725	0.00115737	7077
BRCA	TIMP2	Effector_memory	-0.173104	1.19378e-09	5.46545e-09	7077
BRCA	TIMP2	Exhausted	0.0315815	0.270751	0.32874	7077
BRCA	TIMP2	Gamma_delta	-0.0286957	0.316994	0.383484	7077
BRCA	TIMP2	InfiltrationScore	0.187039	4.73331e-11	1.85397e-10	7077
BRCA	TIMP2	MAIT	0.0622851	0.0297336	0.056611	7077
BRCA	TIMP2	Macrophage	0.182498	1.39381e-10	6.34658e-10	7077
BRCA	TIMP2	Monocyte	0.139938	9.44048e-07	3.75102e-06	7077
BRCA	TIMP2	NK	0.210738	1.07963e-13	3.71137e-13	7077
BRCA	TIMP2	NKT	0.291843	2.42514e-25	2.19068e-24	7077
BRCA	TIMP2	Neutrophil	-0.24057	1.70128e-17	1.27847e-16	7077
BRCA	TIMP2	Tfh	0.147007	2.55958e-07	6.95262e-07	7077
BRCA	TIMP2	Th1	-0.0561755	0.0499898	0.073679	7077
BRCA	TIMP2	Th17	0.0266188	0.353302	0.410593	7077
BRCA	TIMP2	Th2	0.0934763	0.00109035	0.00309025	7077
BRCA	TIMP2	Tr1	0.0827956	0.00383343	0.00765279	7077
BRCA	TIMP2	iTreg	0.124286	1.3615e-05	3.0422e-05	7077
BRCA	TIMP2	nTreg	-0.0783385	0.00623044	0.011164	7077
BRCA	TNF	Bcell	0.262285	1.30588e-20	1.65431e-19	7124
BRCA	TNF	CD4_T	0.192831	1.14757e-11	3.52508e-11	7124
BRCA	TNF	CD4_naive	-0.0386457	0.177707	0.631236	7124
BRCA	TNF	CD8_T	0.231559	2.73269e-16	2.54507e-15	7124
BRCA	TNF	CD8_naive	-0.313588	3.36226e-29	5.63656e-28	7124
BRCA	TNF	Central_memory	0.137212	1.53596e-06	4.30168e-06	7124
BRCA	TNF	Cytotoxic	0.323753	4.06393e-31	5.46485e-30	7124
BRCA	TNF	DC	0.126063	1.021e-05	2.2901e-05	7124
BRCA	TNF	Effector_memory	0.0749649	0.00886381	0.0155882	7124
BRCA	TNF	Exhausted	0.355717	1.21121e-37	2.82012e-36	7124
BRCA	TNF	Gamma_delta	0.046619	0.103905	0.142524	7124
BRCA	TNF	InfiltrationScore	0.372868	1.81169e-41	4.4446e-40	7124
BRCA	TNF	MAIT	-0.226294	1.31252e-15	4.80946e-14	7124
BRCA	TNF	Macrophage	0.0829857	0.00375291	0.00675894	7124
BRCA	TNF	Monocyte	-0.100364	0.000451562	0.00115485	7124
BRCA	TNF	NK	0.276125	9.38943e-23	5.22076e-22	7124
BRCA	TNF	NKT	-0.0158364	0.580842	0.639317	7124
BRCA	TNF	Neutrophil	-0.328643	4.56911e-32	6.219e-31	7124
BRCA	TNF	Tfh	0.250163	7.78909e-19	4.81244e-18	7124
BRCA	TNF	Th1	0.34824	4.77341e-36	1.01939e-34	7124
BRCA	TNF	Th17	-0.275552	1.1581e-22	8.85498e-22	7124
BRCA	TNF	Th2	0.106719	0.000190489	0.000648954	7124
BRCA	TNF	Tr1	0.039002	0.17374	0.236173	7124
BRCA	TNF	iTreg	0.350538	1.55914e-36	2.87226e-35	7124
BRCA	TNF	nTreg	0.112174	8.737e-05	0.000208349	7124
BRCA	TNFRSF11B	Bcell	-0.158546	2.65513e-08	8.92451e-08	4982
BRCA	TNFRSF11B	CD4_T	0.200892	1.48195e-12	4.83182e-12	4982
BRCA	TNFRSF11B	CD4_naive	-0.0563654	0.0492193	0.346568	4982
BRCA	TNFRSF11B	CD8_T	-0.0759108	0.00804011	0.0144143	4982
BRCA	TNFRSF11B	CD8_naive	-0.0888826	0.0019031	0.00360903	4982
BRCA	TNFRSF11B	Central_memory	0.0973829	0.000665894	0.0013466	4982
BRCA	TNFRSF11B	Cytotoxic	0.044437	0.121137	0.160704	4982
BRCA	TNFRSF11B	DC	-0.049363	0.0850617	0.113444	4982
BRCA	TNFRSF11B	Effector_memory	-0.156378	4.1169e-08	1.54745e-07	4982
BRCA	TNFRSF11B	Exhausted	-0.0263678	0.357862	0.420165	4982
BRCA	TNFRSF11B	Gamma_delta	0.0567998	0.0474938	0.0705013	4982
BRCA	TNFRSF11B	InfiltrationScore	0.0271789	0.343262	0.405842	4982
BRCA	TNFRSF11B	MAIT	-0.0139714	0.626172	0.70814	4982
BRCA	TNFRSF11B	Macrophage	-0.0115523	0.687115	0.738549	4982
BRCA	TNFRSF11B	Monocyte	-0.0231734	0.419075	0.507455	4982
BRCA	TNFRSF11B	NK	0.145038	3.70503e-07	8.17439e-07	4982
BRCA	TNFRSF11B	NKT	0.182104	1.52884e-10	5.19871e-10	4982
BRCA	TNFRSF11B	Neutrophil	-0.117352	4.0334e-05	0.000103258	4982
BRCA	TNFRSF11B	Tfh	0.145371	3.48149e-07	9.34203e-07	4982
BRCA	TNFRSF11B	Th1	-0.0774163	0.00686955	0.0118918	4982
BRCA	TNFRSF11B	Th17	0.110375	0.000113426	0.000220997	4982
BRCA	TNFRSF11B	Th2	0.131769	3.94733e-06	1.9564e-05	4982
BRCA	TNFRSF11B	Tr1	-0.0466762	0.103481	0.149603	4982
BRCA	TNFRSF11B	iTreg	0.0325178	0.256794	0.311013	4982
BRCA	TNFRSF11B	nTreg	-0.0139349	0.627073	0.688761	4982
CESC	FGF2	Bcell	-0.0719692	0.206349	0.375978	2247
CESC	FGF2	CD4_T	0.317479	1.09217e-08	1.34898e-07	2247
CESC	FGF2	CD4_naive	0.0725817	0.202503	0.47151	2247
CESC	FGF2	CD8_T	-0.0296905	0.602536	0.724964	2247
CESC	FGF2	CD8_naive	0.102652	0.0710984	0.126954	2247
CESC	FGF2	Central_memory	0.257908	4.21154e-06	3.7101e-05	2247
CESC	FGF2	Cytotoxic	0.0203427	0.721272	0.810888	2247
CESC	FGF2	DC	-0.101125	0.0754272	0.134073	2247
CESC	FGF2	Effector_memory	-0.289262	2.17603e-07	9.73471e-06	2247
CESC	FGF2	Exhausted	-0.099343	0.0807467	0.164348	2247
CESC	FGF2	Gamma_delta	-0.0442977	0.437057	0.608412	2247
CESC	FGF2	InfiltrationScore	-0.0127741	0.822749	0.878638	2247
CESC	FGF2	MAIT	-0.0208588	0.714504	0.843444	2247
CESC	FGF2	Macrophage	-0.085957	0.131015	0.226989	2247
CESC	FGF2	Monocyte	-0.0517082	0.364223	0.600874	2247
CESC	FGF2	NK	0.137526	0.0153871	0.0478383	2247
CESC	FGF2	NKT	0.120945	0.0332813	0.11929	2247
CESC	FGF2	Neutrophil	-0.148389	0.00888069	0.0322768	2247
CESC	FGF2	Tfh	0.0723235	0.204118	0.359983	2247
CESC	FGF2	Th1	-0.106015	0.0622794	0.140835	2247
CESC	FGF2	Th17	0.0457562	0.422097	0.564651	2247
CESC	FGF2	Th2	0.208349	0.00022061	0.00386638	2247
CESC	FGF2	Tr1	0.18196	0.00129222	0.00934555	2247
CESC	FGF2	iTreg	0.0900443	0.113603	0.198472	2247
CESC	FGF2	nTreg	-0.0144528	0.799918	0.880067	2247
CESC	ICAM1	Bcell	-0.121811	0.03203	0.0995653	3383
CESC	ICAM1	CD4_T	-0.00899346	0.874686	0.912658	3383
CESC	ICAM1	CD4_naive	-0.209445	0.000203975	0.0045321	3383
CESC	ICAM1	CD8_T	0.295669	1.13414e-07	1.70779e-06	3383
CESC	ICAM1	CD8_naive	-0.425159	4.87423e-15	6.37059e-13	3383
CESC	ICAM1	Central_memory	0.112903	0.0470134	0.10043	3383
CESC	ICAM1	Cytotoxic	0.489393	4.48834e-20	1.56365e-18	3383
CESC	ICAM1	DC	0.327541	3.47522e-09	5.79117e-08	3383
CESC	ICAM1	Effector_memory	-0.192985	0.000634786	0.00672698	3383
CESC	ICAM1	Exhausted	0.489151	4.71175e-20	3.19393e-18	3383
CESC	ICAM1	Gamma_delta	0.1924	0.000659836	0.00475657	3383
CESC	ICAM1	InfiltrationScore	0.446676	1.31191e-16	4.33624e-15	3383
CESC	ICAM1	MAIT	-0.0692535	0.224035	0.441731	3383
CESC	ICAM1	Macrophage	0.38577	1.9352e-12	8.46789e-11	3383
CESC	ICAM1	Monocyte	-0.0770739	0.175877	0.397772	3383
CESC	ICAM1	NK	0.354737	1.26853e-10	4.62898e-09	3383
CESC	ICAM1	NKT	0.11618	0.0409316	0.136436	3383
CESC	ICAM1	Neutrophil	-0.405214	1.11342e-13	2.60106e-12	3383
CESC	ICAM1	Tfh	0.295036	1.21034e-07	1.79415e-06	3383
CESC	ICAM1	Th1	0.460028	1.21968e-17	6.66394e-16	3383
CESC	ICAM1	Th17	-0.268149	1.6663e-06	2.3548e-05	3383
CESC	ICAM1	Th2	0.145991	0.0100569	0.0514607	3383
CESC	ICAM1	Tr1	0.109453	0.0542131	0.156843	3383
CESC	ICAM1	iTreg	0.417538	1.651e-14	8.82753e-13	3383
CESC	ICAM1	nTreg	0.0411843	0.469986	0.633053	3383
CESC	ICAM3	Bcell	0.397301	3.64046e-13	1.25514e-10	3385
CESC	ICAM3	CD4_T	0.337371	1.0898e-09	1.66994e-08	3385
CESC	ICAM3	CD4_naive	-0.322916	5.91382e-09	5.11942e-07	3385
CESC	ICAM3	CD8_T	0.623243	9.39816e-35	1.1673e-32	3385
CESC	ICAM3	CD8_naive	-0.374587	9.20049e-12	4.27865e-10	3385
CESC	ICAM3	Central_memory	0.384091	2.45505e-12	1.03573e-10	3385
CESC	ICAM3	Cytotoxic	0.625434	4.69458e-35	3.66709e-33	3385
CESC	ICAM3	DC	0.0315235	0.580315	0.679993	3385
CESC	ICAM3	Effector_memory	-0.299985	7.24553e-08	4.12789e-06	3385
CESC	ICAM3	Exhausted	0.469456	2.13839e-18	1.21137e-16	3385
CESC	ICAM3	Gamma_delta	0.377603	6.07764e-12	9.13793e-10	3385
CESC	ICAM3	InfiltrationScore	0.520968	5.74686e-23	2.90202e-21	3385
CESC	ICAM3	MAIT	-0.120264	0.0342945	0.135826	3385
CESC	ICAM3	Macrophage	0.263063	2.65368e-06	2.6869e-05	3385
CESC	ICAM3	Monocyte	-0.327766	3.38587e-09	4.06524e-07	3385
CESC	ICAM3	NK	0.520818	5.94172e-23	1.22491e-20	3385
CESC	ICAM3	NKT	-0.0720545	0.20581	0.396912	3385
CESC	ICAM3	Neutrophil	-0.59796	1.92665e-31	1.14324e-29	3385
CESC	ICAM3	Tfh	0.633805	3.14643e-36	3.41952e-34	3385
CESC	ICAM3	Th1	0.446723	1.30119e-16	6.48873e-15	3385
CESC	ICAM3	Th17	-0.328318	3.17573e-09	8.83241e-08	3385
CESC	ICAM3	Th2	0.057156	0.315817	0.510406	3385
CESC	ICAM3	Tr1	0.355456	1.15705e-10	4.10239e-09	3385
CESC	ICAM3	iTreg	0.286098	2.98418e-07	3.67681e-06	3385
CESC	ICAM3	nTreg	-0.234268	3.0975e-05	0.000576731	3385
CESC	ITGA2	Bcell	-0.214481	0.000141545	0.00161005	3673
CESC	ITGA2	CD4_T	-0.0372971	0.512945	0.623093	3673
CESC	ITGA2	CD4_naive	0.0474969	0.404641	0.673403	3673
CESC	ITGA2	CD8_T	-0.103623	0.0684534	0.146106	3673
CESC	ITGA2	CD8_naive	0.0612167	0.282605	0.389339	3673
CESC	ITGA2	Central_memory	0.231216	3.9504e-05	0.000255319	3673
CESC	ITGA2	Cytotoxic	0.0456803	0.422869	0.555665	3673
CESC	ITGA2	DC	0.23748	2.3897e-05	0.000132119	3673
CESC	ITGA2	Effector_memory	-0.00174808	0.975546	0.988547	3673
CESC	ITGA2	Exhausted	-0.173749	0.00213916	0.0095356	3673
CESC	ITGA2	Gamma_delta	-0.22192	8.1218e-05	0.000906822	3673
CESC	ITGA2	InfiltrationScore	0.0120446	0.832718	0.885919	3673
CESC	ITGA2	MAIT	0.228673	4.8256e-05	0.00130934	3673
CESC	ITGA2	Macrophage	0.0477134	0.4025	0.532151	3673
CESC	ITGA2	Monocyte	0.169652	0.00272908	0.0267792	3673
CESC	ITGA2	NK	-0.126118	0.0263895	0.0734463	3673
CESC	ITGA2	NKT	-0.043271	0.447768	0.642048	3673
CESC	ITGA2	Neutrophil	-0.070026	0.218898	0.371683	3673
CESC	ITGA2	Tfh	0.0183452	0.747662	0.849523	3673
CESC	ITGA2	Th1	-0.0833734	0.143041	0.26206	3673
CESC	ITGA2	Th17	0.0104546	0.854537	0.908173	3673
CESC	ITGA2	Th2	-0.0270632	0.63503	0.783165	3673
CESC	ITGA2	Tr1	0.117005	0.0395099	0.124903	3673
CESC	ITGA2	iTreg	0.315523	1.35782e-08	2.36518e-07	3673
CESC	ITGA2	nTreg	0.110056	0.0528923	0.138025	3673
CESC	LCP1	Bcell	0.238682	2.1667e-05	0.000365009	3936
CESC	LCP1	CD4_T	0.293472	1.42062e-07	1.36119e-06	3936
CESC	LCP1	CD4_naive	-0.350162	2.26445e-10	3.30526e-08	3936
CESC	LCP1	CD8_T	0.606519	1.57304e-32	1.69119e-30	3936
CESC	LCP1	CD8_naive	-0.353558	1.4741e-10	4.50728e-09	3936
CESC	LCP1	Central_memory	0.457599	1.89372e-17	1.68305e-15	3936
CESC	LCP1	Cytotoxic	0.693759	8.15502e-46	1.10186e-43	3936
CESC	LCP1	DC	0.312229	1.95241e-08	2.60804e-07	3936
CESC	LCP1	Effector_memory	-0.333213	1.78879e-09	2.51904e-07	3936
CESC	LCP1	Exhausted	0.544595	2.44754e-25	2.79676e-23	3936
CESC	LCP1	Gamma_delta	0.312221	1.95411e-08	1.02933e-06	3936
CESC	LCP1	InfiltrationScore	0.65239	5.73451e-39	6.78539e-37	3936
CESC	LCP1	MAIT	-0.0223757	0.694746	0.831906	3936
CESC	LCP1	Macrophage	0.459245	1.40605e-17	1.14296e-15	3936
CESC	LCP1	Monocyte	-0.219163	0.000100004	0.0023666	3936
CESC	LCP1	NK	0.429439	2.4235e-15	1.92313e-13	3936
CESC	LCP1	NKT	-0.0911731	0.109129	0.262668	3936
CESC	LCP1	Neutrophil	-0.692321	1.47538e-45	1.82118e-43	3936
CESC	LCP1	Tfh	0.637017	1.09088e-36	1.2537e-34	3936
CESC	LCP1	Th1	0.532291	4.43149e-24	4.32276e-22	3936
CESC	LCP1	Th17	-0.482452	1.77337e-19	1.82795e-17	3936
CESC	LCP1	Th2	0.132926	0.0192146	0.0795353	3936
CESC	LCP1	Tr1	0.431282	1.78818e-15	1.37005e-13	3936
CESC	LCP1	iTreg	0.479769	2.99089e-19	3.36005e-17	3936
CESC	LCP1	nTreg	-0.186757	0.000953046	0.00709269	3936
CESC	MMP1	Bcell	-0.248673	9.40399e-06	0.000189187	4312
CESC	MMP1	CD4_T	-0.121501	0.0324735	0.0671256	4312
CESC	MMP1	CD4_naive	0.104326	0.0665892	0.253829	4312
CESC	MMP1	CD8_T	-0.0796556	0.161801	0.283794	4312
CESC	MMP1	CD8_naive	-0.202343	0.000336586	0.00133679	4312
CESC	MMP1	Central_memory	-0.00294521	0.95881	0.974205	4312
CESC	MMP1	Cytotoxic	0.0699483	0.219411	0.340861	4312
CESC	MMP1	DC	0.15611	0.00588	0.015681	4312
CESC	MMP1	Effector_memory	-0.146068	0.0100173	0.057765	4312
CESC	MMP1	Exhausted	0.0371686	0.514399	0.64654	4312
CESC	MMP1	Gamma_delta	-0.161085	0.00446454	0.0208197	4312
CESC	MMP1	InfiltrationScore	0.0517756	0.363598	0.479925	4312
CESC	MMP1	MAIT	0.13891	0.0143746	0.0764286	4312
CESC	MMP1	Macrophage	-0.00350311	0.951017	0.967762	4312
CESC	MMP1	Monocyte	0.0605844	0.287616	0.528966	4312
CESC	MMP1	NK	0.172952	0.00224388	0.0103151	4312
CESC	MMP1	NKT	0.183002	0.0012103	0.0121376	4312
CESC	MMP1	Neutrophil	0.0226112	0.691697	0.803057	4312
CESC	MMP1	Tfh	-0.105307	0.0640575	0.155268	4312
CESC	MMP1	Th1	0.049986	0.38044	0.531479	4312
CESC	MMP1	Th17	0.0595609	0.295852	0.439471	4312
CESC	MMP1	Th2	0.123225	0.0300746	0.107624	4312
CESC	MMP1	Tr1	-0.0224215	0.694152	0.821892	4312
CESC	MMP1	iTreg	0.0562651	0.323432	0.448707	4312
CESC	MMP1	nTreg	0.132334	0.0197625	0.0668682	4312
CESC	MMP10	Bcell	-0.233743	3.2307e-05	0.000503938	4319
CESC	MMP10	CD4_T	0.0702984	0.217107	0.319956	4319
CESC	MMP10	CD4_naive	0.174421	0.00205443	0.0271324	4319
CESC	MMP10	CD8_T	-0.0885	0.119955	0.22586	4319
CESC	MMP10	CD8_naive	0.0753834	0.185575	0.278119	4319
CESC	MMP10	Central_memory	0.035919	0.52865	0.651029	4319
CESC	MMP10	Cytotoxic	-0.064725	0.255877	0.381935	4319
CESC	MMP10	DC	0.0112057	0.844214	0.890952	4319
CESC	MMP10	Effector_memory	-0.0609118	0.285014	0.537225	4319
CESC	MMP10	Exhausted	-0.17876	0.00157671	0.00749631	4319
CESC	MMP10	Gamma_delta	-0.0902101	0.112937	0.237022	4319
CESC	MMP10	InfiltrationScore	-0.180674	0.00140034	0.00472219	4319
CESC	MMP10	MAIT	0.159244	0.00494773	0.0366037	4319
CESC	MMP10	Macrophage	-0.237518	2.3823e-05	0.000176118	4319
CESC	MMP10	Monocyte	-0.0465816	0.413766	0.64413	4319
CESC	MMP10	NK	0.00189104	0.973546	0.984675	4319
CESC	MMP10	NKT	0.14516	0.0104958	0.0541919	4319
CESC	MMP10	Neutrophil	-0.00821914	0.885397	0.931563	4319
CESC	MMP10	Tfh	-0.0618163	0.277909	0.445514	4319
CESC	MMP10	Th1	-0.11284	0.047137	0.114036	4319
CESC	MMP10	Th17	0.151859	0.00739526	0.0260219	4319
CESC	MMP10	Th2	0.14074	0.0131259	0.0615135	4319
CESC	MMP10	Tr1	-0.0850327	0.135224	0.295496	4319
CESC	MMP10	iTreg	-0.00237648	0.966759	0.978286	4319
CESC	MMP10	nTreg	0.0771911	0.175219	0.325063	4319
CESC	MMP12	Bcell	-0.210935	0.000183236	0.00196968	4321
CESC	MMP12	CD4_T	-0.240425	1.8778e-05	0.000105507	4321
CESC	MMP12	CD4_naive	-0.150236	0.00806014	0.0692348	4321
CESC	MMP12	CD8_T	0.204606	0.00028746	0.00166137	4321
CESC	MMP12	CD8_naive	-0.38487	2.19879e-12	1.22137e-10	4321
CESC	MMP12	Central_memory	0.0895666	0.115539	0.206381	4321
CESC	MMP12	Cytotoxic	0.389925	1.06788e-12	2.47157e-11	4321
CESC	MMP12	DC	0.579865	3.02426e-29	1.5119e-25	4321
CESC	MMP12	Effector_memory	-0.0616501	0.279205	0.530468	4321
CESC	MMP12	Exhausted	0.343723	5.03877e-10	1.36717e-08	4321
CESC	MMP12	Gamma_delta	-0.00576079	0.919534	0.956111	4321
CESC	MMP12	InfiltrationScore	0.42724	3.47436e-15	1.03234e-13	4321
CESC	MMP12	MAIT	0.047142	0.408164	0.624374	4321
CESC	MMP12	Macrophage	0.36664	2.68798e-11	9.65017e-10	4321
CESC	MMP12	Monocyte	0.039734	0.485779	0.702039	4321
CESC	MMP12	NK	0.244326	1.3581e-05	0.00014832	4321
CESC	MMP12	NKT	0.0436475	0.443822	0.638498	4321
CESC	MMP12	Neutrophil	-0.244378	1.3521e-05	0.00012174	4321
CESC	MMP12	Tfh	0.105653	0.063182	0.153649	4321
CESC	MMP12	Th1	0.400712	2.19306e-13	8.43358e-12	4321
CESC	MMP12	Th17	-0.335835	1.30986e-09	3.90361e-08	4321
CESC	MMP12	Th2	0.161692	0.00431486	0.0288962	4321
CESC	MMP12	Tr1	0.166105	0.00335525	0.0198741	4321
CESC	MMP12	iTreg	0.396074	4.36202e-13	1.8559e-11	4321
CESC	MMP12	nTreg	0.111811	0.0492009	0.131095	4321
CESC	MMP13	Bcell	-0.234046	3.1533e-05	0.000495724	4322
CESC	MMP13	CD4_T	-0.02327	0.683192	0.768699	4322
CESC	MMP13	CD4_naive	0.110536	0.0518604	0.218603	4322
CESC	MMP13	CD8_T	-0.0789301	0.165668	0.28893	4322
CESC	MMP13	CD8_naive	-0.0720098	0.206093	0.302741	4322
CESC	MMP13	Central_memory	0.0585351	0.304263	0.434317	4322
CESC	MMP13	Cytotoxic	0.0333153	0.558972	0.679499	4322
CESC	MMP13	DC	0.241075	1.7797e-05	0.000102328	4322
CESC	MMP13	Effector_memory	0.00928126	0.87071	0.942798	4322
CESC	MMP13	Exhausted	-0.0859071	0.131239	0.238439	4322
CESC	MMP13	Gamma_delta	-0.0974914	0.0865906	0.196499	4322
CESC	MMP13	InfiltrationScore	0.0477958	0.401687	0.517345	4322
CESC	MMP13	MAIT	0.296152	1.07905e-07	1.3921e-05	4322
CESC	MMP13	Macrophage	0.0315237	0.580313	0.690704	4322
CESC	MMP13	Monocyte	0.0971428	0.087728	0.26377	4322
CESC	MMP13	NK	0.0308858	0.588002	0.723216	4322
CESC	MMP13	NKT	0.0826187	0.146708	0.319404	4322
CESC	MMP13	Neutrophil	-0.102332	0.0719889	0.165577	4322
CESC	MMP13	Tfh	-0.045476	0.424948	0.592339	4322
CESC	MMP13	Th1	-0.0148846	0.794072	0.869609	4322
CESC	MMP13	Th17	-0.030504	0.592627	0.714978	4322
CESC	MMP13	Th2	0.19857	0.000436205	0.00624124	4322
CESC	MMP13	Tr1	-0.0120487	0.832661	0.910523	4322
CESC	MMP13	iTreg	0.147836	0.00914064	0.0252745	4322
CESC	MMP13	nTreg	-0.0386044	0.498275	0.658642	4322
CESC	MMP14	Bcell	-0.286735	2.8012e-07	1.1719e-05	4323
CESC	MMP14	CD4_T	0.0410298	0.471655	0.585419	4323
CESC	MMP14	CD4_naive	0.0167304	0.769216	0.896911	4323
CESC	MMP14	CD8_T	-0.0735536	0.196509	0.327793	4323
CESC	MMP14	CD8_naive	-0.028076	0.622416	0.711429	4323
CESC	MMP14	Central_memory	0.135539	0.0169493	0.043071	4323
CESC	MMP14	Cytotoxic	0.122052	0.0316897	0.0743168	4323
CESC	MMP14	DC	0.327133	3.64357e-09	6.05153e-08	4323
CESC	MMP14	Effector_memory	-0.12533	0.0273526	0.120361	4323
CESC	MMP14	Exhausted	0.0315428	0.580084	0.700395	4323
CESC	MMP14	Gamma_delta	-0.112782	0.0472509	0.126017	4323
CESC	MMP14	InfiltrationScore	0.209686	0.000200486	0.000875707	4323
CESC	MMP14	MAIT	0.13203	0.0200492	0.0956805	4323
CESC	MMP14	Macrophage	0.25818	4.11127e-06	3.8853e-05	4323
CESC	MMP14	Monocyte	0.200962	0.000370301	0.006286	4323
CESC	MMP14	NK	0.0719688	0.206351	0.34937	4323
CESC	MMP14	NKT	0.204188	0.000295995	0.00431806	4323
CESC	MMP14	Neutrophil	-0.206226	0.000256501	0.00163404	4323
CESC	MMP14	Tfh	-0.0587875	0.302179	0.472391	4323
CESC	MMP14	Th1	0.0601794	0.290856	0.437181	4323
CESC	MMP14	Th17	-0.101178	0.0752728	0.159351	4323
CESC	MMP14	Th2	0.199487	0.000409752	0.00598088	4323
CESC	MMP14	Tr1	0.140534	0.0132619	0.0565577	4323
CESC	MMP14	iTreg	0.294954	1.22065e-07	1.66731e-06	4323
CESC	MMP14	nTreg	0.0259498	0.64902	0.775203	4323
CESC	MMP2	Bcell	-0.1168	0.0398587	0.11703	4313
CESC	MMP2	CD4_T	0.436944	6.94738e-16	3.64637e-14	4313
CESC	MMP2	CD4_naive	0.113024	0.0467748	0.205799	4313
CESC	MMP2	CD8_T	-0.0928008	0.102923	0.200618	4313
CESC	MMP2	CD8_naive	0.222019	8.0615e-05	0.000390802	4313
CESC	MMP2	Central_memory	0.243331	1.4758e-05	0.000109997	4313
CESC	MMP2	Cytotoxic	-0.0079962	0.888485	0.927928	4313
CESC	MMP2	DC	-0.0148883	0.794022	0.854266	4313
CESC	MMP2	Effector_memory	-0.252527	6.75082e-06	0.00015826	4313
CESC	MMP2	Exhausted	-0.0717148	0.207962	0.33703	4313
CESC	MMP2	Gamma_delta	-0.111799	0.0492248	0.130087	4313
CESC	MMP2	InfiltrationScore	0.121749	0.032119	0.0675165	4313
CESC	MMP2	MAIT	0.0833151	0.143322	0.334774	4313
CESC	MMP2	Macrophage	0.0692961	0.22375	0.342477	4313
CESC	MMP2	Monocyte	0.12496	0.0278153	0.127224	4313
CESC	MMP2	NK	0.150673	0.00787576	0.0282041	4313
CESC	MMP2	NKT	0.196255	0.000510247	0.00642229	4313
CESC	MMP2	Neutrophil	-0.24971	8.60593e-06	8.1176e-05	4313
CESC	MMP2	Tfh	0.0709362	0.212954	0.370921	4313
CESC	MMP2	Th1	-0.169824	0.00270164	0.0124884	4313
CESC	MMP2	Th17	0.0699291	0.219538	0.354412	4313
CESC	MMP2	Th2	0.188413	0.000856493	0.00984327	4313
CESC	MMP2	Tr1	0.213278	0.000154581	0.00161621	4313
CESC	MMP2	iTreg	0.0499764	0.380531	0.507713	4313
CESC	MMP2	nTreg	-0.179314	0.00152371	0.010013	4313
CESC	MMP3	Bcell	-0.226409	5.7561e-05	0.000780378	4314
CESC	MMP3	CD4_T	-0.0740515	0.193488	0.292145	4314
CESC	MMP3	CD4_naive	0.0899112	0.11414	0.344574	4314
CESC	MMP3	CD8_T	-0.0793121	0.163623	0.286281	4314
CESC	MMP3	CD8_naive	-0.202202	0.000339883	0.0013472	4314
CESC	MMP3	Central_memory	0.0121357	0.831471	0.88857	4314
CESC	MMP3	Cytotoxic	0.0877607	0.123093	0.217889	4314
CESC	MMP3	DC	0.171851	0.00239621	0.00725891	4314
CESC	MMP3	Effector_memory	-0.1202	0.0343901	0.139612	4314
CESC	MMP3	Exhausted	0.151347	0.00759931	0.0260926	4314
CESC	MMP3	Gamma_delta	-0.17366	0.00215066	0.0117762	4314
CESC	MMP3	InfiltrationScore	0.107884	0.0577808	0.109594	4314
CESC	MMP3	MAIT	0.0114306	0.841129	0.917975	4314
CESC	MMP3	Macrophage	0.0761068	0.181378	0.291725	4314
CESC	MMP3	Monocyte	0.0790678	0.164929	0.3831	4314
CESC	MMP3	NK	0.176049	0.00186152	0.00887995	4314
CESC	MMP3	NKT	0.207705	0.00023096	0.00358301	4314
CESC	MMP3	Neutrophil	0.0100253	0.860447	0.916207	4314
CESC	MMP3	Tfh	-0.0694058	0.223015	0.383108	4314
CESC	MMP3	Th1	0.0970113	0.0881602	0.183239	4314
CESC	MMP3	Th17	0.0421153	0.459998	0.599882	4314
CESC	MMP3	Th2	0.0778744	0.171419	0.342688	4314
CESC	MMP3	Tr1	0.015742	0.782499	0.877208	4314
CESC	MMP3	iTreg	0.1082	0.0570459	0.114218	4314
CESC	MMP3	nTreg	0.104846	0.065236	0.160774	4314
CESC	MMP9	Bcell	-0.0441664	0.438418	0.617437	4318
CESC	MMP9	CD4_T	-0.0144909	0.799402	0.857001	4318
CESC	MMP9	CD4_naive	-0.0955231	0.0931705	0.3076	4318
CESC	MMP9	CD8_T	0.240635	1.8456e-05	0.000158228	4318
CESC	MMP9	CD8_naive	-0.273426	1.01777e-06	8.8836e-06	4318
CESC	MMP9	Central_memory	0.181964	0.00129195	0.00496175	4318
CESC	MMP9	Cytotoxic	0.385486	2.01484e-12	4.56888e-11	4318
CESC	MMP9	DC	0.490183	3.83157e-20	1.5324e-17	4318
CESC	MMP9	Effector_memory	-0.250707	7.89979e-06	0.000177696	4318
CESC	MMP9	Exhausted	0.283107	4.00848e-07	6.92805e-06	4318
CESC	MMP9	Gamma_delta	-0.0117975	0.8361	0.905808	4318
CESC	MMP9	InfiltrationScore	0.489832	4.11028e-20	1.75627e-18	4318
CESC	MMP9	MAIT	0.0824764	0.147408	0.340736	4318
CESC	MMP9	Macrophage	0.423993	5.88622e-15	3.73672e-13	4318
CESC	MMP9	Monocyte	0.0484837	0.394939	0.627689	4318
CESC	MMP9	NK	0.19832	0.000443681	0.00271822	4318
CESC	MMP9	NKT	0.122119	0.0315947	0.115336	4318
CESC	MMP9	Neutrophil	-0.362764	4.48662e-11	8.54467e-10	4318
CESC	MMP9	Tfh	0.190254	0.000759802	0.00436477	4318
CESC	MMP9	Th1	0.260661	3.29483e-06	4.9169e-05	4318
CESC	MMP9	Th17	-0.273331	1.02695e-06	1.5429e-05	4318
CESC	MMP9	Th2	0.084635	0.137067	0.295137	4318
CESC	MMP9	Tr1	0.286095	2.98511e-07	6.06024e-06	4318
CESC	MMP9	iTreg	0.335284	1.39879e-09	3.14997e-08	4318
CESC	MMP9	nTreg	-0.00650729	0.90915	0.947284	4318
CESC	PECAM1	Bcell	0.181235	0.00135218	0.00922854	5175
CESC	PECAM1	CD4_T	0.394165	5.77164e-13	1.68983e-11	5175
CESC	PECAM1	CD4_naive	-0.252455	6.79278e-06	0.000252952	5175
CESC	PECAM1	CD8_T	0.389075	1.20677e-12	3.30571e-11	5175
CESC	PECAM1	CD8_naive	-0.207475	0.000234772	0.000976758	5175
CESC	PECAM1	Central_memory	0.3092	2.71571e-08	4.59053e-07	5175
CESC	PECAM1	Cytotoxic	0.477983	4.22496e-19	1.39878e-17	5175
CESC	PECAM1	DC	0.126965	0.0253869	0.0540065	5175
CESC	PECAM1	Effector_memory	-0.367426	2.42066e-11	8.64393e-09	5175
CESC	PECAM1	Exhausted	0.337366	1.0904e-09	2.84656e-08	5175
CESC	PECAM1	Gamma_delta	0.230467	4.1913e-05	0.000528209	5175
CESC	PECAM1	InfiltrationScore	0.556832	1.21706e-26	7.39744e-25	5175
CESC	PECAM1	MAIT	0.0900291	0.113664	0.292001	5175
CESC	PECAM1	Macrophage	0.389	1.2199e-12	5.50664e-11	5175
CESC	PECAM1	Monocyte	-0.08228	0.148377	0.359822	5175
CESC	PECAM1	NK	0.440337	3.90907e-16	3.4742e-14	5175
CESC	PECAM1	NKT	0.0979738	0.0850364	0.222313	5175
CESC	PECAM1	Neutrophil	-0.532103	4.62696e-24	1.93163e-22	5175
CESC	PECAM1	Tfh	0.441204	3.37129e-16	1.18899e-14	5175
CESC	PECAM1	Th1	0.250855	7.79961e-06	0.000103086	5175
CESC	PECAM1	Th17	-0.284068	3.64729e-07	6.23375e-06	5175
CESC	PECAM1	Th2	0.173687	0.00214719	0.01814	5175
CESC	PECAM1	Tr1	0.415915	2.1324e-14	1.42139e-12	5175
CESC	PECAM1	iTreg	0.219487	9.7603e-05	0.000533853	5175
CESC	PECAM1	nTreg	-0.237557	2.3747e-05	0.000477737	5175
CESC	SERPINE1	Bcell	-0.391506	8.49864e-13	2.74108e-10	5054
CESC	SERPINE1	CD4_T	-0.124533	0.028357	0.0599995	5054
CESC	SERPINE1	CD4_naive	0.0153958	0.787166	0.905699	5054
CESC	SERPINE1	CD8_T	-0.11301	0.0468024	0.10811	5054
CESC	SERPINE1	CD8_naive	-0.214576	0.000140558	0.00062894	5054
CESC	SERPINE1	Central_memory	0.0271454	0.634002	0.740459	5054
CESC	SERPINE1	Cytotoxic	0.11638	0.0405828	0.0908977	5054
CESC	SERPINE1	DC	0.285789	3.0772e-07	2.9513e-06	5054
CESC	SERPINE1	Effector_memory	-0.169455	0.00276086	0.0215502	5054
CESC	SERPINE1	Exhausted	0.0900215	0.113695	0.213219	5054
CESC	SERPINE1	Gamma_delta	-0.0728815	0.20064	0.359066	5054
CESC	SERPINE1	InfiltrationScore	0.120153	0.0344616	0.0716202	5054
CESC	SERPINE1	MAIT	0.0857413	0.131988	0.319025	5054
CESC	SERPINE1	Macrophage	0.192875	0.00063945	0.00284981	5054
CESC	SERPINE1	Monocyte	0.108505	0.0563468	0.201029	5054
CESC	SERPINE1	NK	0.153378	0.00681786	0.0251962	5054
CESC	SERPINE1	NKT	0.25283	6.57538e-06	0.000285418	5054
CESC	SERPINE1	Neutrophil	-0.105255	0.0641883	0.152035	5054
CESC	SERPINE1	Tfh	-0.0235162	0.680024	0.800898	5054
CESC	SERPINE1	Th1	0.0858266	0.131603	0.24634	5054
CESC	SERPINE1	Th17	-0.0431796	0.448728	0.5898	5054
CESC	SERPINE1	Th2	0.177485	0.00170534	0.0156031	5054
CESC	SERPINE1	Tr1	-0.00939196	0.869182	0.931958	5054
CESC	SERPINE1	iTreg	0.186467	0.000970942	0.00380279	5054
CESC	SERPINE1	nTreg	0.111897	0.0490239	0.130693	5054
CESC	SPP1	Bcell	-0.135108	0.0173062	0.0634993	6696
CESC	SPP1	CD4_T	-0.220685	8.9184e-05	0.000418152	6696
CESC	SPP1	CD4_naive	-0.121481	0.0325029	0.166785	6696
CESC	SPP1	CD8_T	-0.0246761	0.665176	0.773884	6696
CESC	SPP1	CD8_naive	-0.158463	0.00516687	0.0139436	6696
CESC	SPP1	Central_memory	-0.0600621	0.291799	0.420882	6696
CESC	SPP1	Cytotoxic	0.144931	0.01062	0.0308809	6696
CESC	SPP1	DC	0.463152	6.89161e-18	1.54844e-15	6696
CESC	SPP1	Effector_memory	0.0537564	0.345509	0.598868	6696
CESC	SPP1	Exhausted	0.160272	0.00467253	0.0178416	6696
CESC	SPP1	Gamma_delta	-0.123366	0.0298855	0.0897732	6696
CESC	SPP1	InfiltrationScore	0.417654	1.6211e-14	4.5466e-13	6696
CESC	SPP1	MAIT	0.0720945	0.205558	0.420172	6696
CESC	SPP1	Macrophage	0.586066	5.54136e-30	9.72022e-28	6696
CESC	SPP1	Monocyte	0.359918	6.50703e-11	1.34145e-08	6696
CESC	SPP1	NK	-0.0422619	0.458437	0.612671	6696
CESC	SPP1	NKT	0.0289184	0.612007	0.76985	6696
CESC	SPP1	Neutrophil	-0.072743	0.201499	0.350198	6696
CESC	SPP1	Tfh	-0.0567591	0.319195	0.489752	6696
CESC	SPP1	Th1	0.137274	0.015578	0.0491424	6696
CESC	SPP1	Th17	-0.158955	0.00502774	0.019165	6696
CESC	SPP1	Th2	0.0214562	0.706699	0.830993	6696
CESC	SPP1	Tr1	0.113862	0.045159	0.13722	6696
CESC	SPP1	iTreg	0.109951	0.0531208	0.107778	6696
CESC	SPP1	nTreg	-0.0332593	0.559633	0.70744	6696
CESC	TIMP2	Bcell	-0.134068	0.0181943	0.0657806	7077
CESC	TIMP2	CD4_T	0.310605	2.33137e-08	2.63541e-07	7077
CESC	TIMP2	CD4_naive	0.0706112	0.215063	0.4871	7077
CESC	TIMP2	CD8_T	-0.123628	0.0295365	0.0752682	7077
CESC	TIMP2	CD8_naive	0.165105	0.00355396	0.0101084	7077
CESC	TIMP2	Central_memory	0.039656	0.486636	0.613227	7077
CESC	TIMP2	Cytotoxic	-0.0433574	0.44686	0.578822	7077
CESC	TIMP2	DC	-0.0451154	0.428633	0.540713	7077
CESC	TIMP2	Effector_memory	-0.266117	2.00909e-06	5.8395e-05	7077
CESC	TIMP2	Exhausted	0.0358682	0.529234	0.65848	7077
CESC	TIMP2	Gamma_delta	-0.0498603	0.38164	0.556343	7077
CESC	TIMP2	InfiltrationScore	0.12375	0.0293752	0.0627448	7077
CESC	TIMP2	MAIT	-0.105303	0.0640671	0.20297	7077
CESC	TIMP2	Macrophage	0.127476	0.0247975	0.0598017	7077
CESC	TIMP2	Monocyte	0.147375	0.00936266	0.0618313	7077
CESC	TIMP2	NK	0.112434	0.0479412	0.116458	7077
CESC	TIMP2	NKT	0.301263	6.33671e-08	1.0648e-05	7077
CESC	TIMP2	Neutrophil	-0.128933	0.0231827	0.069691	7077
CESC	TIMP2	Tfh	-0.0413356	0.468355	0.632818	7077
CESC	TIMP2	Th1	-0.136552	0.0161366	0.0504656	7077
CESC	TIMP2	Th17	0.0831766	0.14399	0.258516	7077
CESC	TIMP2	Th2	0.127676	0.0245705	0.0939457	7077
CESC	TIMP2	Tr1	0.127688	0.0245568	0.0891059	7077
CESC	TIMP2	iTreg	0.0149211	0.793579	0.859886	7077
CESC	TIMP2	nTreg	-0.0499087	0.381177	0.552576	7077
CESC	TNF	Bcell	-0.0291469	0.609198	0.755955	7124
CESC	TNF	CD4_T	-0.0905306	0.111658	0.186754	7124
CESC	TNF	CD4_naive	-0.0504711	0.375828	0.648497	7124
CESC	TNF	CD8_T	0.098957	0.0819379	0.168234	7124
CESC	TNF	CD8_naive	-0.279905	5.47716e-07	5.19084e-06	7124
CESC	TNF	Central_memory	-0.0159083	0.780259	0.853055	7124
CESC	TNF	Cytotoxic	0.263549	2.5393e-06	2.4542e-05	7124
CESC	TNF	DC	0.166541	0.00327175	0.00947779	7124
CESC	TNF	Effector_memory	-0.0522826	0.358912	0.611821	7124
CESC	TNF	Exhausted	0.262319	2.83833e-06	3.7991e-05	7124
CESC	TNF	Gamma_delta	-0.00964233	0.865727	0.924181	7124
CESC	TNF	InfiltrationScore	0.212597	0.000162443	0.000730804	7124
CESC	TNF	MAIT	0.0580688	0.308138	0.531927	7124
CESC	TNF	Macrophage	0.129854	0.0222093	0.0546541	7124
CESC	TNF	Monocyte	0.00180594	0.974737	0.988428	7124
CESC	TNF	NK	0.185445	0.00103659	0.00543062	7124
CESC	TNF	NKT	0.0562535	0.323532	0.527184	7124
CESC	TNF	Neutrophil	-0.0915737	0.107575	0.222758	7124
CESC	TNF	Tfh	0.0909519	0.109994	0.230489	7124
CESC	TNF	Th1	0.265581	2.1101e-06	3.3595e-05	7124
CESC	TNF	Th17	-0.07405	0.193497	0.322877	7124
CESC	TNF	Th2	0.0819831	0.149852	0.313417	7124
CESC	TNF	Tr1	0.0712468	0.210952	0.395743	7124
CESC	TNF	iTreg	0.189607	0.000792586	0.00320513	7124
CESC	TNF	nTreg	0.0542392	0.341187	0.513759	7124
CESC	TNFRSF11B	Bcell	-0.256237	4.88152e-06	0.000110675	4982
CESC	TNFRSF11B	CD4_T	0.206522	0.000251177	0.00104034	4982
CESC	TNFRSF11B	CD4_naive	0.102061	0.0727492	0.266072	4982
CESC	TNFRSF11B	CD8_T	-0.154029	0.00658307	0.0223225	4982
CESC	TNFRSF11B	CD8_naive	0.0865949	0.128169	0.205665	4982
CESC	TNFRSF11B	Central_memory	0.0797016	0.161558	0.267618	4982
CESC	TNFRSF11B	Cytotoxic	-0.129445	0.0226369	0.0568825	4982
CESC	TNFRSF11B	DC	-0.161234	0.00442726	0.0123355	4982
CESC	TNFRSF11B	Effector_memory	-0.153718	0.0066943	0.0428371	4982
CESC	TNFRSF11B	Exhausted	-0.110182	0.0526198	0.118375	4982
CESC	TNFRSF11B	Gamma_delta	-0.0865132	0.128531	0.260142	4982
CESC	TNFRSF11B	InfiltrationScore	-0.189012	0.000823833	0.00297475	4982
CESC	TNFRSF11B	MAIT	0.0647269	0.255863	0.476483	4982
CESC	TNFRSF11B	Macrophage	-0.202125	0.000341719	0.00168725	4982
CESC	TNFRSF11B	Monocyte	-0.0341571	0.549077	0.749495	4982
CESC	TNFRSF11B	NK	0.028131	0.621734	0.75005	4982
CESC	TNFRSF11B	NKT	0.134793	0.0175709	0.0765669	4982
CESC	TNFRSF11B	Neutrophil	0.0780588	0.170404	0.310745	4982
CESC	TNFRSF11B	Tfh	-0.0752969	0.186081	0.337114	4982
CESC	TNFRSF11B	Th1	-0.186698	0.000956684	0.00559381	4982
CESC	TNFRSF11B	Th17	0.194821	0.000561753	0.00329232	4982
CESC	TNFRSF11B	Th2	0.0174883	0.759077	0.865409	4982
CESC	TNFRSF11B	Tr1	0.0102323	0.857596	0.925478	4982
CESC	TNFRSF11B	iTreg	0.0184469	0.746311	0.825624	4982
CESC	TNFRSF11B	nTreg	0.148702	0.00873689	0.0365679	4982
CHOL	FGF2	Bcell	-0.296323	0.0480983	0.123964	2247
CHOL	FGF2	CD4_T	0.076188	0.618888	0.798903	2247
CHOL	FGF2	CD4_naive	-0.0319955	0.834725	0.949749	2247
CHOL	FGF2	CD8_T	0.102128	0.50441	0.890591	2247
CHOL	FGF2	CD8_naive	-0.142479	0.350481	0.481369	2247
CHOL	FGF2	Central_memory	0.25327	0.0932169	0.491786	2247
CHOL	FGF2	Cytotoxic	0.195361	0.198415	0.654948	2247
CHOL	FGF2	DC	0.0309628	0.839988	0.93483	2247
CHOL	FGF2	Effector_memory	-0.281001	0.0615065	0.200767	2247
CHOL	FGF2	Exhausted	0.178805	0.239911	0.945036	2247
CHOL	FGF2	Gamma_delta	0.0165609	0.914015	0.976496	2247
CHOL	FGF2	InfiltrationScore	0.303456	0.0427218	0.132331	2247
CHOL	FGF2	MAIT	0.323272	0.0303051	0.149845	2247
CHOL	FGF2	Macrophage	0.462299	0.00138782	0.0109678	2247
CHOL	FGF2	Monocyte	0.0635214	0.678477	0.77188	2247
CHOL	FGF2	NK	0.173283	0.254977	0.445828	2247
CHOL	FGF2	NKT	0.0112825	0.941362	0.978945	2247
CHOL	FGF2	Neutrophil	-0.235073	0.120085	0.526588	2247
CHOL	FGF2	Tfh	0.34115	0.0218259	0.10708	2247
CHOL	FGF2	Th1	0.269781	0.0730992	0.335403	2247
CHOL	FGF2	Th17	0.199163	0.189649	0.304862	2247
CHOL	FGF2	Th2	0.130276	0.393677	0.8936	2247
CHOL	FGF2	Tr1	-0.0535997	0.72657	0.833904	2247
CHOL	FGF2	iTreg	0.10341	0.499047	0.805029	2247
CHOL	FGF2	nTreg	-0.145206	0.341239	0.473469	2247
CHOL	ICAM1	Bcell	0.134818	0.377248	0.514767	3383
CHOL	ICAM1	CD4_T	0.35293	0.0174075	0.140815	3383
CHOL	ICAM1	CD4_naive	0.115305	0.450704	0.822279	3383
CHOL	ICAM1	CD8_T	-0.0530408	0.729313	0.949161	3383
CHOL	ICAM1	CD8_naive	0.178997	0.2394	0.364362	3383
CHOL	ICAM1	Central_memory	0.0834896	0.585576	0.89872	3383
CHOL	ICAM1	Cytotoxic	0.0334717	0.827213	0.964078	3383
CHOL	ICAM1	DC	0.371158	0.012069	0.135584	3383
CHOL	ICAM1	Effector_memory	0.0700777	0.647362	0.796151	3383
CHOL	ICAM1	Exhausted	0.032196	0.833704	0.991282	3383
CHOL	ICAM1	Gamma_delta	-0.184886	0.224035	0.621873	3383
CHOL	ICAM1	InfiltrationScore	0.134994	0.376621	0.548794	3383
CHOL	ICAM1	MAIT	-0.198247	0.191737	0.379785	3383
CHOL	ICAM1	Macrophage	0.135652	0.374275	0.515572	3383
CHOL	ICAM1	Monocyte	-0.261004	0.0833165	0.178043	3383
CHOL	ICAM1	NK	-0.186987	0.218722	0.405326	3383
CHOL	ICAM1	NKT	0.356593	0.0161981	0.270698	3383
CHOL	ICAM1	Neutrophil	-0.178859	0.239769	0.698497	3383
CHOL	ICAM1	Tfh	0.0749976	0.624394	0.772427	3383
CHOL	ICAM1	Th1	-0.0708215	0.643868	0.825747	3383
CHOL	ICAM1	Th17	-0.205883	0.174835	0.286667	3383
CHOL	ICAM1	Th2	0.3362	0.0239453	0.707906	3383
CHOL	ICAM1	Tr1	0.402756	0.00608849	0.051115	3383
CHOL	ICAM1	iTreg	0.0820787	0.59195	0.856355	3383
CHOL	ICAM1	nTreg	0.0565059	0.712365	0.797797	3383
CHOL	ICAM3	Bcell	-0.023524	0.878095	0.922234	3385
CHOL	ICAM3	CD4_T	0.124168	0.416415	0.658178	3385
CHOL	ICAM3	CD4_naive	-0.26188	0.0822493	0.577569	3385
CHOL	ICAM3	CD8_T	0.580022	2.9682e-05	0.00408357	3385
CHOL	ICAM3	CD8_naive	-0.487302	0.000686368	0.0105168	3385
CHOL	ICAM3	Central_memory	0.352897	0.0174187	0.212549	3385
CHOL	ICAM3	Cytotoxic	0.519931	0.000251704	0.00981493	3385
CHOL	ICAM3	DC	-0.173589	0.254125	0.544183	3385
CHOL	ICAM3	Effector_memory	-0.516892	0.000277549	0.0134213	3385
CHOL	ICAM3	Exhausted	0.141584	0.353547	0.960737	3385
CHOL	ICAM3	Gamma_delta	0.425616	0.00355926	0.344452	3385
CHOL	ICAM3	InfiltrationScore	0.562506	5.7776e-05	0.00382248	3385
CHOL	ICAM3	MAIT	0.364925	0.0137105	0.106331	3385
CHOL	ICAM3	Macrophage	0.323484	0.0301904	0.0859765	3385
CHOL	ICAM3	Monocyte	-0.0850026	0.578775	0.691725	3385
CHOL	ICAM3	NK	0.606358	1.0114e-05	0.00266654	3385
CHOL	ICAM3	NKT	-0.0114816	0.940329	0.978673	3385
CHOL	ICAM3	Neutrophil	-0.355147	0.0166668	0.172825	3385
CHOL	ICAM3	Tfh	0.733815	9.7535e-09	1.08883e-06	3385
CHOL	ICAM3	Th1	0.48409	0.000753609	0.034159	3385
CHOL	ICAM3	Th17	0.0446684	0.770777	0.840379	3385
CHOL	ICAM3	Th2	-0.198214	0.191811	0.805682	3385
CHOL	ICAM3	Tr1	-0.00388977	0.979768	0.990466	3385
CHOL	ICAM3	iTreg	0.0555803	0.716879	0.906763	3385
CHOL	ICAM3	nTreg	-0.363678	0.0140605	0.0468349	3385
CHOL	ITGA2	Bcell	0.181537	0.232688	0.36378	3673
CHOL	ITGA2	CD4_T	0.251236	0.0959655	0.322849	3673
CHOL	ITGA2	CD4_naive	0.249686	0.0981022	0.597793	3673
CHOL	ITGA2	CD8_T	-0.348422	0.0189995	0.297555	3673
CHOL	ITGA2	CD8_naive	0.454509	0.00170995	0.0162399	3673
CHOL	ITGA2	Central_memory	-0.0250069	0.870474	0.974581	3673
CHOL	ITGA2	Cytotoxic	-0.271793	0.0709021	0.458809	3673
CHOL	ITGA2	DC	0.366745	0.0132127	0.141515	3673
CHOL	ITGA2	Effector_memory	0.260446	0.0840019	0.239851	3673
CHOL	ITGA2	Exhausted	-0.193647	0.20246	0.935723	3673
CHOL	ITGA2	Gamma_delta	-0.315916	0.0345092	0.41366	3673
CHOL	ITGA2	InfiltrationScore	-0.342919	0.0211077	0.0851816	3673
CHOL	ITGA2	MAIT	-0.479734	0.000854204	0.0380693	3673
CHOL	ITGA2	Macrophage	-0.16754	0.271305	0.410743	3673
CHOL	ITGA2	Monocyte	-0.146943	0.335435	0.468812	3673
CHOL	ITGA2	NK	-0.578488	3.1514e-05	0.00460736	3673
CHOL	ITGA2	NKT	0.279341	0.0631218	0.414783	3673
CHOL	ITGA2	Neutrophil	-0.0429682	0.77928	0.956791	3673
CHOL	ITGA2	Tfh	-0.387125	0.00861038	0.0607046	3673
CHOL	ITGA2	Th1	-0.443178	0.00229683	0.0716919	3673
CHOL	ITGA2	Th17	-0.232961	0.123548	0.222127	3673
CHOL	ITGA2	Th2	0.356759	0.0161451	0.700737	3673
CHOL	ITGA2	Tr1	0.394449	0.00733451	0.0569051	3673
[truncated: 13,677 more rows]
