# Supplementary material for: Pan-cancer analyses of senescence-related genes in extracellular matrix characterization in cancer
Source: Discov Oncol. 2023 Nov 20;14:208. doi: 10.1007/s12672-023-00828-7 (PMC10660488; doi:10.1007/s12672-023-00828-7)
Supplement: Supplementary file 10 — Supplementary file10 (XLSX 312 KB) [file 12672_2023_828_MOESM10_ESM.xlsx]

## Sheet: SheetName
Table S5 The difference of immune infiltration between mutant and wide type in 33 cancers
cancertype	symbol	cell_type	logfc	p_value	fdr	entrez
BLCA	ICAM1	CD4_naive	-0.364741	0.993386	0.99887	3383
BLCA	ICAM1	CD8_naive	0.684779	0.0416195	0.658147	3383
BLCA	ICAM1	Cytotoxic	0.0833203	0.799168	0.968165	3383
BLCA	ICAM1	Exhausted	-0.157443	0.753196	0.945725	3383
BLCA	ICAM1	Tr1	0.3464	0.0523978	0.977994	3383
BLCA	ICAM1	nTreg	-0.214792	0.0550056	0.795555	3383
BLCA	ICAM1	iTreg	0.0781695	0.796664	0.97171	3383
BLCA	ICAM1	Th1	-0.0972029	0.848351	0.971287	3383
BLCA	ICAM1	Th2	0.289347	0.0635228	0.97435	3383
BLCA	ICAM1	Th17	-0.0196664	0.905829	0.986716	3383
BLCA	ICAM1	Tfh	0.10831	0.804108	0.980397	3383
BLCA	ICAM1	Central_memory	0.781358	0.0596333	0.765616	3383
BLCA	ICAM1	Effector_memory	-0.463751	0.291653	0.855076	3383
BLCA	ICAM1	NKT	0.222545	0.467534	0.828168	3383
BLCA	ICAM1	MAIT	-0.0497069	0.734832	0.963331	3383
BLCA	ICAM1	DC	0.0325072	0.93542	0.992204	3383
BLCA	ICAM1	Bcell	-0.0998889	0.889156	0.985732	3383
BLCA	ICAM1	Monocyte	0.0350763	0.723871	0.991345	3383
BLCA	ICAM1	Macrophage	0.0340868	0.903264	0.991324	3383
BLCA	ICAM1	NK	0.127861	0.589448	0.946871	3383
BLCA	ICAM1	Neutrophil	-0.295164	0.0849496	0.75832	3383
BLCA	ICAM1	Gamma_delta	0.0559518	0.858479	0.978732	3383
BLCA	ICAM1	CD4_T	0.201433	0.301173	0.822456	3383
BLCA	ICAM1	CD8_T	0.135082	0.271878	0.771165	3383
BLCA	ICAM1	InfiltrationScore	0.0372968	0.545537	0.941547	3383
BLCA	ICAM3	CD4_naive	2.01393	0.0148345	0.727317	3385
BLCA	ICAM3	CD8_naive	1.23066	0.0038673	0.658147	3385
BLCA	ICAM3	Cytotoxic	-0.665886	0.0380948	0.49742	3385
BLCA	ICAM3	Exhausted	-1.68451	0.0291907	0.462531	3385
BLCA	ICAM3	Tr1	-0.890928	0.129945	0.977994	3385
BLCA	ICAM3	nTreg	-0.402795	0.094023	0.815247	3385
BLCA	ICAM3	iTreg	-0.926523	0.0745237	0.709104	3385
BLCA	ICAM3	Th1	-1.44947	0.0321786	0.527277	3385
BLCA	ICAM3	Th2	-0.904303	0.0607639	0.97435	3385
BLCA	ICAM3	Th17	0.743008	0.0185894	0.508878	3385
BLCA	ICAM3	Tfh	-0.627247	0.207449	0.842231	3385
BLCA	ICAM3	Central_memory	-0.253911	0.446431	0.931926	3385
BLCA	ICAM3	Effector_memory	-0.814489	0.226185	0.83047	3385
BLCA	ICAM3	NKT	-1.85963	0.0449921	0.451794	3385
BLCA	ICAM3	MAIT	-0.125917	0.706984	0.955268	3385
BLCA	ICAM3	DC	-0.88182	0.0437794	0.706699	3385
BLCA	ICAM3	Bcell	0.250887	0.242679	0.809708	3385
BLCA	ICAM3	Monocyte	-0.668543	0.00524549	0.961951	3385
BLCA	ICAM3	Macrophage	-1.03244	0.0103797	0.795122	3385
BLCA	ICAM3	NK	-0.706561	0.0936256	0.737668	3385
BLCA	ICAM3	Neutrophil	0.367874	0.107777	0.763249	3385
BLCA	ICAM3	Gamma_delta	0.116836	0.667621	0.937457	3385
BLCA	ICAM3	CD4_T	0.192976	0.31238	0.829193	3385
BLCA	ICAM3	CD8_T	-0.231638	0.191898	0.722967	3385
BLCA	ICAM3	InfiltrationScore	-0.346555	0.00630166	0.782108	3385
BLCA	ITGA2	CD4_naive	0.937575	0.280704	0.727317	3673
BLCA	ITGA2	CD8_naive	0.355407	0.481992	0.887178	3673
BLCA	ITGA2	Cytotoxic	0.0329741	0.928803	0.988792	3673
BLCA	ITGA2	Exhausted	0.181518	0.576217	0.884721	3673
BLCA	ITGA2	Tr1	-0.110445	0.454868	0.984666	3673
BLCA	ITGA2	nTreg	0.0363771	0.950772	0.996658	3673
BLCA	ITGA2	iTreg	0.102558	0.688222	0.956911	3673
BLCA	ITGA2	Th1	0.0193586	0.97408	0.998598	3673
BLCA	ITGA2	Th2	-0.161199	0.333738	0.97435	3673
BLCA	ITGA2	Th17	-0.242711	0.370708	0.807426	3673
BLCA	ITGA2	Tfh	-0.0512051	0.900415	0.994689	3673
BLCA	ITGA2	Central_memory	-0.0839188	0.961954	0.99811	3673
BLCA	ITGA2	Effector_memory	-0.421485	0.338924	0.871549	3673
BLCA	ITGA2	NKT	-0.294231	0.551845	0.862116	3673
BLCA	ITGA2	MAIT	0.0392061	0.9159	0.989963	3673
BLCA	ITGA2	DC	-0.0966348	0.634073	0.93902	3673
BLCA	ITGA2	Bcell	-0.154553	0.836535	0.975731	3673
BLCA	ITGA2	Monocyte	0.289169	0.0173096	0.961951	3673
BLCA	ITGA2	Macrophage	0.0981024	0.581824	0.951098	3673
BLCA	ITGA2	NK	0.050477	0.802448	0.982046	3673
BLCA	ITGA2	Neutrophil	0.0677167	0.673924	0.959776	3673
BLCA	ITGA2	Gamma_delta	-0.03392	0.963708	0.998854	3673
BLCA	ITGA2	CD4_T	-0.109242	0.702626	0.953792	3673
BLCA	ITGA2	CD8_T	-0.0124703	0.965013	0.995523	3673
BLCA	ITGA2	InfiltrationScore	0.0342213	0.593009	0.951653	3673
BLCA	LCP1	CD4_naive	-0.191209	0.46343	0.784468	3936
BLCA	LCP1	CD8_naive	0.322248	0.412522	0.87299	3936
BLCA	LCP1	Cytotoxic	0.0119622	0.827965	0.973779	3936
BLCA	LCP1	Exhausted	-0.219826	0.677773	0.921116	3936
BLCA	LCP1	Tr1	0.0843037	0.910093	0.998938	3936
BLCA	LCP1	nTreg	0.142386	0.257003	0.863443	3936
BLCA	LCP1	iTreg	0.0117217	0.886491	0.988418	3936
BLCA	LCP1	Th1	-0.174295	0.718804	0.938745	3936
BLCA	LCP1	Th2	-0.167698	0.252587	0.97435	3936
BLCA	LCP1	Th17	-0.151319	0.649966	0.924868	3936
BLCA	LCP1	Tfh	0.0258175	0.847886	0.985969	3936
BLCA	LCP1	Central_memory	-0.620215	0.244152	0.865769	3936
BLCA	LCP1	Effector_memory	0.17216	0.625253	0.958565	3936
BLCA	LCP1	NKT	-1.69805	0.0503302	0.451794	3936
BLCA	LCP1	MAIT	0.329661	0.127665	0.715349	3936
BLCA	LCP1	DC	-0.358723	0.111493	0.723906	3936
BLCA	LCP1	Bcell	-0.171022	0.747663	0.9581	3936
BLCA	LCP1	Monocyte	0.0357572	0.861308	0.996331	3936
BLCA	LCP1	Macrophage	-0.163467	0.594291	0.951972	3936
BLCA	LCP1	NK	-0.307541	0.351836	0.891071	3936
BLCA	LCP1	Neutrophil	0.133938	0.421847	0.909467	3936
BLCA	LCP1	Gamma_delta	0.429514	0.201761	0.752991	3936
BLCA	LCP1	CD4_T	-0.245665	0.279109	0.812492	3936
BLCA	LCP1	CD8_T	0.0332818	0.883125	0.982093	3936
BLCA	LCP1	InfiltrationScore	-0.126722	0.183701	0.839076	3936
BLCA	MMP1	CD4_naive		0.232516	0.727317	4312
BLCA	MMP1	CD8_naive	-0.901418	0.28431	0.826274	4312
BLCA	MMP1	Cytotoxic	0.340248	0.056433	0.527622	4312
BLCA	MMP1	Exhausted	0.519094	0.133892	0.605827	4312
BLCA	MMP1	Tr1	-0.0319234	0.802191	0.991663	4312
BLCA	MMP1	nTreg	0.238771	0.196657	0.833736	4312
BLCA	MMP1	iTreg	0.16372	0.586557	0.938673	4312
BLCA	MMP1	Th1	0.529534	0.139588	0.642535	4312
BLCA	MMP1	Th2	0.128921	0.823793	0.994537	4312
BLCA	MMP1	Th17	-0.44919	0.235557	0.740914	4312
BLCA	MMP1	Tfh	0.595339	0.142914	0.813403	4312
BLCA	MMP1	Central_memory	0.5141	0.395435	0.915706	4312
BLCA	MMP1	Effector_memory	0.684136	0.132407	0.786364	4312
BLCA	MMP1	NKT	-0.918339	0.210067	0.66423	4312
BLCA	MMP1	MAIT	0.0581052	0.869049	0.986782	4312
BLCA	MMP1	DC	0.19123	0.424509	0.878581	4312
BLCA	MMP1	Bcell	-0.0702382	0.945374	0.989517	4312
BLCA	MMP1	Monocyte	0.0177774	0.899473	0.996331	4312
BLCA	MMP1	Macrophage	0.24724	0.324683	0.883202	4312
BLCA	MMP1	NK	0.422691	0.0932341	0.737668	4312
BLCA	MMP1	Neutrophil	-0.352787	0.137301	0.785735	4312
BLCA	MMP1	Gamma_delta	-0.0680983	0.921521	0.992119	4312
BLCA	MMP1	CD4_T	0.0282908	0.94708	0.997209	4312
BLCA	MMP1	CD8_T	0.245905	0.16143	0.693817	4312
BLCA	MMP1	InfiltrationScore	0.144703	0.111172	0.813491	4312
BLCA	MMP10	CD4_naive	0.127368	0.705861	0.901679	4319
BLCA	MMP10	CD8_naive	-0.014306	0.885259	0.983972	4319
BLCA	MMP10	Cytotoxic	-0.104475	0.406145	0.82359	4319
BLCA	MMP10	Exhausted	-0.154669	0.677848	0.921116	4319
BLCA	MMP10	Tr1	-0.187746	0.405138	0.982162	4319
BLCA	MMP10	nTreg	-0.151566	0.712834	0.972768	4319
BLCA	MMP10	iTreg	-0.183673	0.421156	0.893955	4319
BLCA	MMP10	Th1	-0.453695	0.386627	0.809894	4319
BLCA	MMP10	Th2	-0.0413024	0.571348	0.981478	4319
BLCA	MMP10	Th17	-0.057315	0.856749	0.974601	4319
BLCA	MMP10	Tfh	0.0349397	0.826535	0.982284	4319
BLCA	MMP10	Central_memory	0.114546	0.933533	0.99811	4319
BLCA	MMP10	Effector_memory	0.0291732	0.852466	0.988649	4319
BLCA	MMP10	NKT	-0.552916	0.363648	0.76771	4319
BLCA	MMP10	MAIT	0.0409549	0.888496	0.987265	4319
BLCA	MMP10	DC	-0.649496	0.0111028	0.696182	4319
BLCA	MMP10	Bcell	0.239002	0.281884	0.824121	4319
BLCA	MMP10	Monocyte	-0.0216782	0.791286	0.993894	4319
BLCA	MMP10	Macrophage	-0.253474	0.366766	0.898459	4319
BLCA	MMP10	NK	-0.12172	0.548932	0.938123	4319
BLCA	MMP10	Neutrophil	0.239726	0.162477	0.793854	4319
BLCA	MMP10	Gamma_delta	0.192083	0.585619	0.912266	4319
BLCA	MMP10	CD4_T	0.0492876	0.808894	0.972406	4319
BLCA	MMP10	CD8_T	-0.0394983	0.807535	0.969617	4319
BLCA	MMP10	InfiltrationScore	-0.0864848	0.297062	0.874904	4319
BLCA	MMP13	CD4_naive	0.26935	0.980325	0.993932	4322
BLCA	MMP13	CD8_naive	0.0936397	0.66642	0.932298	4322
BLCA	MMP13	Cytotoxic	-0.404977	0.309331	0.767115	4322
BLCA	MMP13	Exhausted	0.0167431	0.984662	0.997227	4322
BLCA	MMP13	Tr1	0.354164	0.097004	0.977994	4322
BLCA	MMP13	nTreg	0.0726215	0.636902	0.963316	4322
BLCA	MMP13	iTreg	-0.0597619	0.546979	0.928749	4322
BLCA	MMP13	Th1	-0.493293	0.21862	0.709511	4322
BLCA	MMP13	Th2	-0.303496	0.15992	0.97435	4322
BLCA	MMP13	Th17	-0.496476	0.170982	0.691849	4322
BLCA	MMP13	Tfh	-0.249107	0.691072	0.964698	4322
BLCA	MMP13	Central_memory	0.0991671	0.588798	0.964415	4322
BLCA	MMP13	Effector_memory	-0.745049	0.283093	0.85011	4322
BLCA	MMP13	NKT	-0.509481	0.476651	0.831739	4322
BLCA	MMP13	MAIT	-0.176116	0.786197	0.970232	4322
BLCA	MMP13	DC	-0.00326548	0.864331	0.977536	4322
BLCA	MMP13	Bcell	-0.0357218	0.877782	0.984447	4322
BLCA	MMP13	Monocyte	0.18373	0.208386	0.961951	4322
BLCA	MMP13	Macrophage	-0.0782498	0.782922	0.976276	4322
BLCA	MMP13	NK	0.0255389	0.797726	0.980742	4322
BLCA	MMP13	Neutrophil	0.242714	0.235869	0.828771	4322
BLCA	MMP13	Gamma_delta	-0.214003	0.779579	0.96081	4322
BLCA	MMP13	CD4_T	0.150888	0.475622	0.895459	4322
BLCA	MMP13	CD8_T	-0.298428	0.322719	0.802262	4322
BLCA	MMP13	InfiltrationScore	0.0168188	0.886214	0.989503	4322
BLCA	MMP14	CD4_naive		0.232516	0.727317	4323
BLCA	MMP14	CD8_naive	-1.57412	0.124236	0.740866	4323
BLCA	MMP14	Cytotoxic	0.402966	0.0231073	0.484803	4323
BLCA	MMP14	Exhausted	0.692855	0.0349267	0.474318	4323
BLCA	MMP14	Tr1	0.240856	0.309136	0.982162	4323
BLCA	MMP14	nTreg	-0.10554	0.479821	0.943701	4323
BLCA	MMP14	iTreg	0.378186	0.0652616	0.707668	4323
BLCA	MMP14	Th1	0.61991	0.064332	0.558141	4323
BLCA	MMP14	Th2	0.368031	0.0529274	0.97435	4323
BLCA	MMP14	Th17	-0.35212	0.322573	0.784395	4323
BLCA	MMP14	Tfh	0.934315	0.0363859	0.792203	4323
BLCA	MMP14	Central_memory	0.188078	0.634957	0.972883	4323
BLCA	MMP14	Effector_memory	0.197227	0.482031	0.918035	4323
BLCA	MMP14	NKT	-0.900652	0.207739	0.662996	4323
BLCA	MMP14	MAIT	-0.644683	0.0430352	0.647282	4323
BLCA	MMP14	DC	0.111114	0.60735	0.932255	4323
BLCA	MMP14	Bcell	0.112158	0.576272	0.923067	4323
BLCA	MMP14	Monocyte	-0.00618871	0.837143	0.994854	4323
BLCA	MMP14	Macrophage	0.248449	0.30208	0.882163	4323
BLCA	MMP14	NK	0.587388	0.0193862	0.651454	4323
BLCA	MMP14	Neutrophil	-0.696559	0.0179859	0.75832	4323
BLCA	MMP14	Gamma_delta	0.530334	0.239681	0.775287	4323
BLCA	MMP14	CD4_T	0.191304	0.346151	0.846438	4323
BLCA	MMP14	CD8_T	0.352437	0.0970448	0.630989	4323
BLCA	MMP14	InfiltrationScore	0.181723	0.035321	0.782108	4323
BLCA	MMP2	CD4_naive	-0.121089	0.793743	0.941813	4313
BLCA	MMP2	CD8_naive	-0.149114	0.826469	0.973854	4313
BLCA	MMP2	Cytotoxic	0.0861442	0.679121	0.934973	4313
BLCA	MMP2	Exhausted	0.276655	0.289732	0.733626	4313
BLCA	MMP2	Tr1	-0.284899	0.313292	0.982162	4313
BLCA	MMP2	nTreg	-0.0755179	0.604077	0.959952	4313
BLCA	MMP2	iTreg	-0.204795	0.511562	0.922873	4313
BLCA	MMP2	Th1	0.158787	0.687557	0.931409	4313
BLCA	MMP2	Th2	-0.112679	0.775009	0.994537	4313
BLCA	MMP2	Th17	-0.135018	0.65405	0.926461	4313
BLCA	MMP2	Tfh	0.000122329	0.979366	0.999445	4313
BLCA	MMP2	Central_memory	-0.214709	0.662623	0.977635	4313
BLCA	MMP2	Effector_memory	0.0683966	0.881125	0.988921	4313
BLCA	MMP2	NKT	0.21324	0.608871	0.884804	4313
BLCA	MMP2	MAIT	0.082287	0.74438	0.964867	4313
BLCA	MMP2	DC	0.0406219	0.917632	0.989421	4313
BLCA	MMP2	Bcell	-0.122929	0.91421	0.986387	4313
BLCA	MMP2	Monocyte	-0.194518	0.145257	0.961951	4313
BLCA	MMP2	Macrophage	0.0360919	0.93932	0.99629	4313
BLCA	MMP2	NK	0.203438	0.23831	0.849121	4313
BLCA	MMP2	Neutrophil	0.0696811	0.804867	0.977313	4313
BLCA	MMP2	Gamma_delta	0.168514	0.566466	0.905568	4313
BLCA	MMP2	CD4_T	0.00555065	0.93018	0.996793	4313
BLCA	MMP2	CD8_T	0.157405	0.227608	0.747595	4313
BLCA	MMP2	InfiltrationScore	0.0500135	0.497804	0.93262	4313
BLCA	MMP3	CD4_naive	0.554784	0.522411	0.826305	4314
BLCA	MMP3	CD8_naive	0.102661	0.771478	0.961279	4314
BLCA	MMP3	Cytotoxic	-0.251736	0.621217	0.913396	4314
BLCA	MMP3	Exhausted	-0.192737	0.765457	0.951029	4314
BLCA	MMP3	Tr1	-0.809898	0.336465	0.982162	4314
BLCA	MMP3	nTreg	0.0950512	0.649118	0.966396	4314
BLCA	MMP3	iTreg	-0.13422	0.548782	0.929522	4314
BLCA	MMP3	Th1	0.0897566	0.978367	0.999528	4314
BLCA	MMP3	Th2	-0.419668	0.160305	0.97435	4314
BLCA	MMP3	Th17	0.198527	0.704212	0.938425	4314
BLCA	MMP3	Tfh	-0.159544	0.877832	0.992693	4314
BLCA	MMP3	Central_memory		0.0793361	0.765616	4314
BLCA	MMP3	Effector_memory	0.497825	0.568627	0.944349	4314
BLCA	MMP3	NKT	-4.26355	0.0486182	0.451794	4314
BLCA	MMP3	MAIT	-0.192856	0.445875	0.891246	4314
BLCA	MMP3	DC	0.114786	0.733502	0.958502	4314
BLCA	MMP3	Bcell	0.180863	0.380588	0.860293	4314
BLCA	MMP3	Monocyte	-0.877946	0.0387365	0.961951	4314
BLCA	MMP3	Macrophage	-1.16782	0.0474203	0.79669	4314
BLCA	MMP3	NK	-0.0383869	0.904073	0.993254	4314
BLCA	MMP3	Neutrophil	0.364411	0.165749	0.794884	4314
BLCA	MMP3	Gamma_delta	0.910648	0.0743912	0.667724	4314
BLCA	MMP3	CD4_T	-0.00319462	0.98798	1	4314
BLCA	MMP3	CD8_T	0.289127	0.190989	0.72221	4314
BLCA	MMP3	InfiltrationScore	-0.103304	0.456752	0.92508	4314
BLCA	MMP9	CD4_naive	-1.0591	0.460451	0.781347	4318
BLCA	MMP9	CD8_naive	-0.158037	0.410219	0.87167	4318
BLCA	MMP9	Cytotoxic	0.262637	0.0514291	0.523845	4318
BLCA	MMP9	Exhausted	0.57162	0.0404996	0.482307	4318
BLCA	MMP9	Tr1	0.00613645	0.802919	0.991663	4318
BLCA	MMP9	nTreg	0.13389	0.37014	0.913877	4318
BLCA	MMP9	iTreg	0.0437099	0.706941	0.960437	4318
BLCA	MMP9	Th1	0.564962	0.0398943	0.537177	4318
BLCA	MMP9	Th2	0.0438788	0.782939	0.994537	4318
BLCA	MMP9	Th17	-0.251283	0.574992	0.898341	4318
BLCA	MMP9	Tfh	-0.0983758	0.871216	0.991286	4318
BLCA	MMP9	Central_memory	-0.0977849	0.710792	0.982716	4318
BLCA	MMP9	Effector_memory	0.568374	0.140299	0.787374	4318
BLCA	MMP9	NKT	-0.592145	0.147128	0.607982	4318
BLCA	MMP9	MAIT	0.0906969	0.682988	0.949559	4318
BLCA	MMP9	DC	0.117122	0.89813	0.984561	4318
BLCA	MMP9	Bcell	-0.296022	0.444316	0.877483	4318
BLCA	MMP9	Monocyte	0.0718293	0.610845	0.986787	4318
BLCA	MMP9	Macrophage	0.164048	0.38773	0.90424	4318
BLCA	MMP9	NK	0.346309	0.120164	0.771431	4318
BLCA	MMP9	Neutrophil	-0.259345	0.197061	0.81353	4318
BLCA	MMP9	Gamma_delta	0.107709	0.673418	0.93893	4318
BLCA	MMP9	CD4_T	-0.280063	0.186581	0.75505	4318
BLCA	MMP9	CD8_T	0.153149	0.268359	0.768603	4318
BLCA	MMP9	InfiltrationScore	0.0663821	0.274726	0.863892	4318
BLCA	SERPINE1	CD4_naive		0.142376	0.727317	5054
BLCA	SERPINE1	CD8_naive	-1.06563	0.0849111	0.722417	5054
BLCA	SERPINE1	Cytotoxic	0.321598	0.0607648	0.531701	5054
BLCA	SERPINE1	Exhausted	0.639411	0.0253183	0.451517	5054
BLCA	SERPINE1	Tr1	-0.103477	0.815688	0.991663	5054
BLCA	SERPINE1	nTreg	0.0108946	0.853993	0.991456	5054
BLCA	SERPINE1	iTreg	0.295851	0.0888082	0.721266	5054
BLCA	SERPINE1	Th1	0.454851	0.136316	0.640429	5054
BLCA	SERPINE1	Th2	0.0297447	0.737827	0.993004	5054
BLCA	SERPINE1	Th17	-0.286103	0.39533	0.81831	5054
BLCA	SERPINE1	Tfh	0.13616	0.752327	0.974793	5054
BLCA	SERPINE1	Central_memory	-0.142718	0.934944	0.99811	5054
BLCA	SERPINE1	Effector_memory	0.328464	0.345221	0.873744	5054
BLCA	SERPINE1	NKT	-0.837935	0.103266	0.550836	5054
BLCA	SERPINE1	MAIT	0.2347	0.25099	0.793501	5054
BLCA	SERPINE1	DC	-0.0769828	0.744444	0.959272	5054
BLCA	SERPINE1	Bcell	-0.122981	0.605144	0.929452	5054
BLCA	SERPINE1	Monocyte	-0.0631459	0.613737	0.986787	5054
BLCA	SERPINE1	Macrophage	0.172472	0.431351	0.915495	5054
BLCA	SERPINE1	NK	0.452866	0.0523748	0.692899	5054
BLCA	SERPINE1	Neutrophil	-0.224173	0.335092	0.877164	5054
BLCA	SERPINE1	Gamma_delta	0.618178	0.0604484	0.662334	5054
BLCA	SERPINE1	CD4_T	-0.33009	0.109968	0.719534	5054
BLCA	SERPINE1	CD8_T	0.298736	0.039975	0.570297	5054
BLCA	SERPINE1	InfiltrationScore	0.0821492	0.450045	0.923122	5054
BLCA	SPP1	CD4_naive	1.0202	0.0519363	0.727317	6696
BLCA	SPP1	CD8_naive	1.41962	0.0259998	0.658147	6696
BLCA	SPP1	Cytotoxic	-0.376578	0.138874	0.640252	6696
BLCA	SPP1	Exhausted	-0.123821	0.830176	0.965058	6696
BLCA	SPP1	Tr1	-0.268092	0.616086	0.987129	6696
BLCA	SPP1	nTreg	-0.038595	0.764911	0.978419	6696
BLCA	SPP1	iTreg	-0.657873	0.123458	0.756178	6696
BLCA	SPP1	Th1	-0.983275	0.189906	0.690711	6696
BLCA	SPP1	Th2	-0.972637	0.0489183	0.97435	6696
BLCA	SPP1	Th17	0.220853	0.519992	0.874735	6696
BLCA	SPP1	Tfh	-0.696458	0.508154	0.929011	6696
BLCA	SPP1	Central_memory	-0.000992953	0.755087	0.986192	6696
BLCA	SPP1	Effector_memory	-0.732279	0.410818	0.898954	6696
BLCA	SPP1	NKT	-1.68029	0.156323	0.614314	6696
BLCA	SPP1	MAIT	0.252874	0.371284	0.854844	6696
BLCA	SPP1	DC	-0.267568	0.453815	0.885619	6696
BLCA	SPP1	Bcell	0.0236636	0.792715	0.964797	6696
BLCA	SPP1	Monocyte	0.337156	0.114169	0.961951	6696
BLCA	SPP1	Macrophage	-0.276187	0.496766	0.936365	6696
BLCA	SPP1	NK	-0.170352	0.719276	0.972555	6696
BLCA	SPP1	Neutrophil	0.376052	0.240011	0.829281	6696
BLCA	SPP1	Gamma_delta	-0.183772	0.820737	0.970948	6696
BLCA	SPP1	CD4_T	-0.513279	0.485348	0.897628	6696
BLCA	SPP1	CD8_T	-0.176233	0.47222	0.866996	6696
BLCA	SPP1	InfiltrationScore	-0.0756015	0.568097	0.946509	6696
BLCA	TIMP2	CD4_naive		0.234007	0.727317	7077
BLCA	TIMP2	CD8_naive	-0.870985	0.266878	0.824563	7077
BLCA	TIMP2	Cytotoxic	0.403121	0.0164416	0.481846	7077
BLCA	TIMP2	Exhausted	0.686557	0.0454129	0.488327	7077
BLCA	TIMP2	Tr1	-0.0242256	0.762237	0.989124	7077
BLCA	TIMP2	nTreg	-0.01898	0.908402	0.993135	7077
BLCA	TIMP2	iTreg	0.428717	0.0197636	0.692453	7077
BLCA	TIMP2	Th1	0.778409	0.0218801	0.517687	7077
BLCA	TIMP2	Th2	0.390681	0.0203335	0.97435	7077
BLCA	TIMP2	Th17	-0.411232	0.280056	0.761488	7077
BLCA	TIMP2	Tfh	0.519222	0.175935	0.831028	7077
BLCA	TIMP2	Central_memory	-0.0682858	0.58233	0.961883	7077
BLCA	TIMP2	Effector_memory	0.271787	0.623743	0.958565	7077
BLCA	TIMP2	NKT	0.394308	0.527999	0.852265	7077
BLCA	TIMP2	MAIT	-0.216296	0.325999	0.834776	7077
BLCA	TIMP2	DC	0.0924905	0.668476	0.9446	7077
BLCA	TIMP2	Bcell	-1.4046	0.014968	0.632726	7077
BLCA	TIMP2	Monocyte	0.226719	0.170031	0.961951	7077
BLCA	TIMP2	Macrophage	0.315985	0.238728	0.855174	7077
BLCA	TIMP2	NK	0.589445	0.0191006	0.651454	7077
BLCA	TIMP2	Neutrophil	-0.465343	0.0551738	0.75832	7077
BLCA	TIMP2	Gamma_delta	-0.025574	0.95751	0.998191	7077
BLCA	TIMP2	CD4_T	0.334713	0.150398	0.737047	7077
BLCA	TIMP2	CD8_T	0.0509627	0.754134	0.959539	7077
BLCA	TIMP2	InfiltrationScore	0.146548	0.0836332	0.790984	7077
BLCA	TNF	CD4_naive	1.27801	0.128681	0.727317	7124
BLCA	TNF	CD8_naive	0.559225	0.274193	0.825254	7124
BLCA	TNF	Cytotoxic	-0.837373	0.113476	0.613396	7124
BLCA	TNF	Exhausted	-0.703654	0.227203	0.689941	7124
BLCA	TNF	Tr1	-0.314991	0.156373	0.977994	7124
BLCA	TNF	nTreg	0.111345	0.435204	0.931714	7124
BLCA	TNF	iTreg	-0.302483	0.293984	0.85405	7124
BLCA	TNF	Th1	-1.37224	0.0380667	0.535133	7124
BLCA	TNF	Th2	-0.362966	0.232049	0.97435	7124
BLCA	TNF	Th17	0.427679	0.359619	0.801865	7124
BLCA	TNF	Tfh	-0.269571	0.801077	0.980397	7124
BLCA	TNF	Central_memory	-0.941009	0.745169	0.986192	7124
BLCA	TNF	Effector_memory	-0.343637	0.656358	0.96318	7124
BLCA	TNF	NKT	-0.181245	0.829791	0.957125	7124
BLCA	TNF	MAIT	0.0534215	0.89197	0.987265	7124
BLCA	TNF	DC	-0.0945074	0.727718	0.956938	7124
BLCA	TNF	Bcell	-0.0540132	0.853074	0.980441	7124
BLCA	TNF	Monocyte	0.0528764	0.937019	0.996331	7124
BLCA	TNF	Macrophage	-0.420413	0.387468	0.904218	7124
BLCA	TNF	NK	-0.356657	0.338039	0.887214	7124
BLCA	TNF	Neutrophil	0.316165	0.120976	0.767989	7124
BLCA	TNF	Gamma_delta	-0.0141478	0.942898	0.996096	7124
BLCA	TNF	CD4_T	0.0844393	0.698258	0.953512	7124
BLCA	TNF	CD8_T	-0.260128	0.197414	0.727507	7124
BLCA	TNF	InfiltrationScore	-0.111753	0.357042	0.893323	7124
BLCA	TNFRSF11B	CD4_naive	1.97743	0.268907	0.727317	4982
BLCA	TNFRSF11B	CD8_naive	0.944153	0.292409	0.830057	4982
BLCA	TNFRSF11B	Cytotoxic	-0.0311057	0.849452	0.977549	4982
BLCA	TNFRSF11B	Exhausted	0.242663	0.662157	0.915585	4982
BLCA	TNFRSF11B	Tr1	0.35632	0.179978	0.977994	4982
BLCA	TNFRSF11B	nTreg	-0.0707478	0.73576	0.976339	4982
BLCA	TNFRSF11B	iTreg	0.143217	0.68862	0.957185	4982
BLCA	TNFRSF11B	Th1	0.0515629	0.966354	0.996877	4982
BLCA	TNFRSF11B	Th2	-0.20356	0.467761	0.981478	4982
BLCA	TNFRSF11B	Th17	0.217761	0.548778	0.888549	4982
BLCA	TNFRSF11B	Tfh	0.105444	0.927951	0.996033	4982
BLCA	TNFRSF11B	Central_memory	1.15883	0.10715	0.806987	4982
BLCA	TNFRSF11B	Effector_memory	-0.514023	0.597605	0.952604	4982
BLCA	TNFRSF11B	NKT	-0.40055	0.681759	0.912704	4982
BLCA	TNFRSF11B	MAIT	-0.56718	0.11929	0.709279	4982
BLCA	TNFRSF11B	DC	0.324146	0.2436	0.805923	4982
BLCA	TNFRSF11B	Bcell	-0.101549	0.961549	0.992439	4982
BLCA	TNFRSF11B	Monocyte	-0.0328398	0.913622	0.996331	4982
BLCA	TNFRSF11B	Macrophage	0.18505	0.631896	0.956384	4982
BLCA	TNFRSF11B	NK	-0.739636	0.295793	0.869412	4982
BLCA	TNFRSF11B	Neutrophil	-0.0734684	0.854174	0.988527	4982
BLCA	TNFRSF11B	Gamma_delta	-0.710324	0.33938	0.820905	4982
BLCA	TNFRSF11B	CD4_T	-0.170384	0.544768	0.915166	4982
BLCA	TNFRSF11B	CD8_T	-0.198664	0.532825	0.886271	4982
BLCA	TNFRSF11B	InfiltrationScore	-0.0688999	0.593828	0.951653	4982
BRCA	FGF2	CD4_naive		0.888078	0.888362	2247
BRCA	FGF2	CD8_naive	0.359034	0.366828	0.850713	2247
BRCA	FGF2	Cytotoxic	0.0957968	0.588588	0.847606	2247
BRCA	FGF2	Exhausted	-0.311769	0.751137	0.892285	2247
BRCA	FGF2	Tr1	0.159085	0.661967	0.976622	2247
BRCA	FGF2	nTreg	-0.259464	0.522797	0.93842	2247
BRCA	FGF2	iTreg	0.113519	0.90759	0.98312	2247
BRCA	FGF2	Th1	-0.0202033	0.987588	0.997326	2247
BRCA	FGF2	Th2	-0.0765731	0.587764	0.845714	2247
BRCA	FGF2	Th17	0.149944	0.696454	0.913622	2247
BRCA	FGF2	Tfh	0.0451664	0.955149	0.990894	2247
BRCA	FGF2	Central_memory	0.14339	0.871637	0.965112	2247
BRCA	FGF2	Effector_memory	0.114135	0.780866	0.996807	2247
BRCA	FGF2	NKT	0.538226	0.362381	0.699874	2247
BRCA	FGF2	MAIT	0.290658	0.500489	0.885205	2247
BRCA	FGF2	DC	0.221262	0.312501	0.812641	2247
BRCA	FGF2	Bcell	-0.327706	0.353075	0.950364	2247
BRCA	FGF2	Monocyte	0.17819	0.271969	0.804093	2247
BRCA	FGF2	Macrophage	0.254996	0.245745	0.928333	2247
BRCA	FGF2	NK	-0.000493962	0.967546	0.999296	2247
BRCA	FGF2	Neutrophil	-0.193288	0.377163	0.867827	2247
BRCA	FGF2	Gamma_delta	0.0208868	0.948476	0.992958	2247
BRCA	FGF2	CD4_T	0.237977	0.307368	0.814595	2247
BRCA	FGF2	CD8_T	-0.0977504	0.635588	0.920312	2247
BRCA	FGF2	InfiltrationScore	0.0572734	0.425469	0.89989	2247
BRCA	ICAM1	CD4_naive		0.801045	0.888362	3383
BRCA	ICAM1	CD8_naive	-0.012509	0.874023	0.988652	3383
BRCA	ICAM1	Cytotoxic	0.129298	0.215819	0.591503	3383
BRCA	ICAM1	Exhausted	0.616254	0.0208376	0.26027	3383
BRCA	ICAM1	Tr1	-0.369221	0.436078	0.945168	3383
BRCA	ICAM1	nTreg	0.151236	0.491378	0.937186	3383
BRCA	ICAM1	iTreg	0.0945608	0.579707	0.89563	3383
BRCA	ICAM1	Th1	0.291338	0.104526	0.394925	3383
BRCA	ICAM1	Th2	-0.143644	0.0871701	0.464282	3383
BRCA	ICAM1	Th17	-0.429452	0.157894	0.59342	3383
BRCA	ICAM1	Tfh	0.362845	0.0778809	0.502706	3383
BRCA	ICAM1	Central_memory	0.348136	0.233152	0.637633	3383
BRCA	ICAM1	Effector_memory	-0.0140942	0.855171	0.997167	3383
BRCA	ICAM1	NKT	-0.355596	0.100165	0.450578	3383
BRCA	ICAM1	MAIT	-0.226719	0.269834	0.780366	3383
BRCA	ICAM1	DC	0.0833403	0.541486	0.901162	3383
BRCA	ICAM1	Bcell	0.0414574	0.804799	0.986262	3383
BRCA	ICAM1	Monocyte	-0.228817	0.237061	0.785736	3383
BRCA	ICAM1	Macrophage	0.0496934	0.760682	0.98898	3383
BRCA	ICAM1	NK	0.0859313	0.887699	0.995766	3383
BRCA	ICAM1	Neutrophil	-0.281106	0.0864006	0.755017	3383
BRCA	ICAM1	Gamma_delta	0.318097	0.132865	0.691115	3383
BRCA	ICAM1	CD4_T	0.0493562	0.59929	0.909808	3383
BRCA	ICAM1	CD8_T	0.221363	0.339777	0.811139	3383
BRCA	ICAM1	InfiltrationScore	0.0105779	0.667281	0.955021	3383
BRCA	ICAM3	CD4_naive		0.861	0.888362	3385
BRCA	ICAM3	CD8_naive	0.522427	0.139715	0.72883	3385
BRCA	ICAM3	Cytotoxic	-0.0520703	0.485629	0.788737	3385
BRCA	ICAM3	Exhausted	0.181304	0.429453	0.702315	3385
BRCA	ICAM3	Tr1	0.138513	0.641015	0.973181	3385
BRCA	ICAM3	nTreg	0.266655	0.269348	0.880416	3385
BRCA	ICAM3	iTreg	0.298168	0.462695	0.852053	3385
BRCA	ICAM3	Th1	-0.288224	0.242025	0.546248	3385
BRCA	ICAM3	Th2	-0.215322	0.0647895	0.442549	3385
BRCA	ICAM3	Th17	-0.0585613	0.720036	0.92429	3385
BRCA	ICAM3	Tfh	-0.540548	0.129858	0.566351	3385
BRCA	ICAM3	Central_memory	-0.284475	0.467395	0.794349	3385
BRCA	ICAM3	Effector_memory	1.48063	0.0049873	0.935925	3385
BRCA	ICAM3	NKT		0.018926	0.310432	3385
BRCA	ICAM3	MAIT	0.0483142	0.93462	0.989497	3385
BRCA	ICAM3	DC	0.0439358	0.775516	0.961474	3385
BRCA	ICAM3	Bcell	-0.324618	0.262216	0.944883	3385
BRCA	ICAM3	Monocyte	0.247047	0.0980554	0.726467	3385
BRCA	ICAM3	Macrophage	0.377605	0.147542	0.928333	3385
BRCA	ICAM3	NK	-0.26773	0.218881	0.896897	3385
BRCA	ICAM3	Neutrophil	0.0925397	0.492986	0.911459	3385
BRCA	ICAM3	Gamma_delta	-0.341081	0.232706	0.761178	3385
BRCA	ICAM3	CD4_T	-0.257163	0.245569	0.783995	3385
BRCA	ICAM3	CD8_T	-0.244196	0.194998	0.720069	3385
BRCA	ICAM3	InfiltrationScore	0.00482427	0.917552	0.99405	3385
BRCA	ITGA2	CD4_naive		0.770103	0.888362	3673
BRCA	ITGA2	CD8_naive	0.313023	0.189339	0.768578	3673
BRCA	ITGA2	Cytotoxic	-0.0332647	0.400293	0.738001	3673
BRCA	ITGA2	Exhausted	-0.212427	0.892217	0.957656	3673
BRCA	ITGA2	Tr1	0.370985	0.120135	0.922337	3673
BRCA	ITGA2	nTreg	0.104348	0.540459	0.941842	3673
BRCA	ITGA2	iTreg	0.134701	0.590735	0.900315	3673
BRCA	ITGA2	Th1	-0.0284274	0.832401	0.936305	3673
BRCA	ITGA2	Th2	-0.112572	0.187405	0.568486	3673
BRCA	ITGA2	Th17	0.215356	0.327878	0.731459	3673
BRCA	ITGA2	Tfh	-0.208784	0.315884	0.73443	3673
BRCA	ITGA2	Central_memory	0.0331641	0.963652	0.990928	3673
BRCA	ITGA2	Effector_memory	0.236493	0.357858	0.956884	3673
BRCA	ITGA2	NKT	-0.264066	0.700552	0.897757	3673
BRCA	ITGA2	MAIT	-0.132453	0.279736	0.787871	3673
BRCA	ITGA2	DC	0.103344	0.305568	0.811101	3673
BRCA	ITGA2	Bcell	-0.369033	0.0677354	0.93519	3673
BRCA	ITGA2	Monocyte	0.123443	0.377518	0.851002	3673
BRCA	ITGA2	Macrophage	0.197678	0.123679	0.928333	3673
BRCA	ITGA2	NK	-0.38741	0.0243407	0.858712	3673
BRCA	ITGA2	Neutrophil	0.103219	0.287272	0.822304	3673
BRCA	ITGA2	Gamma_delta	-0.203086	0.278131	0.789128	3673
BRCA	ITGA2	CD4_T	-0.0164258	0.845517	0.968751	3673
BRCA	ITGA2	CD8_T	-0.110144	0.366922	0.822558	3673
BRCA	ITGA2	InfiltrationScore	-0.0241476	0.584553	0.939847	3673
BRCA	LCP1	CD4_naive		0.801045	0.888362	3936
BRCA	LCP1	CD8_naive	-1.07069	0.0269121	0.680013	3936
BRCA	LCP1	Cytotoxic	0.102869	0.324256	0.683968	3936
BRCA	LCP1	Exhausted	0.506602	0.1626	0.470152	3936
BRCA	LCP1	Tr1	-0.32638	0.49535	0.956086	3936
BRCA	LCP1	nTreg	-0.19661	0.521044	0.93842	3936
BRCA	LCP1	iTreg	-0.0509507	0.765423	0.950029	3936
BRCA	LCP1	Th1	0.30872	0.132522	0.430803	3936
BRCA	LCP1	Th2	0.100365	0.445556	0.765667	3936
BRCA	LCP1	Th17	-0.368898	0.197891	0.63224	3936
BRCA	LCP1	Tfh	0.191564	0.33352	0.744742	3936
BRCA	LCP1	Central_memory	0.146529	0.630863	0.873445	3936
BRCA	LCP1	Effector_memory	0.0879647	0.7104	0.985865	3936
BRCA	LCP1	NKT	0.327248	0.40162	0.730447	3936
BRCA	LCP1	MAIT	-0.206263	0.223614	0.749353	3936
BRCA	LCP1	DC	0.223724	0.172432	0.755719	3936
BRCA	LCP1	Bcell	0.0125257	0.989506	0.999315	3936
BRCA	LCP1	Monocyte	0.0480451	0.786645	0.963702	3936
BRCA	LCP1	Macrophage	0.0120986	0.761209	0.98898	3936
BRCA	LCP1	NK	0.118443	0.532367	0.956841	3936
BRCA	LCP1	Neutrophil	-0.0801803	0.569337	0.934599	3936
BRCA	LCP1	Gamma_delta	0.0748776	0.700314	0.941001	3936
BRCA	LCP1	CD4_T	-0.135428	0.671814	0.932326	3936
BRCA	LCP1	CD8_T	0.140263	0.262986	0.76849	3936
BRCA	LCP1	InfiltrationScore	0.0516327	0.23189	0.845774	3936
BRCA	MMP1	CD4_naive		0.861	0.888362	4312
BRCA	MMP1	CD8_naive	0.217195	0.705428	0.955075	4312
BRCA	MMP1	Cytotoxic	0.0244216	0.786015	0.933268	4312
BRCA	MMP1	Exhausted	0.849175	0.0414209	0.305171	4312
BRCA	MMP1	Tr1	0.38151	0.352564	0.941336	4312
BRCA	MMP1	nTreg	-0.822118	0.0986412	0.826392	4312
BRCA	MMP1	iTreg	-0.873451	0.0804385	0.660306	4312
BRCA	MMP1	Th1	-6.7799e-05	0.916777	0.970147	4312
BRCA	MMP1	Th2	-0.39533	0.0145104	0.371039	4312
BRCA	MMP1	Th17	0.220342	0.443885	0.803183	4312
BRCA	MMP1	Tfh	-1.12751	0.0205884	0.445718	4312
BRCA	MMP1	Central_memory	-1.99111	0.0308735	0.366572	4312
BRCA	MMP1	Effector_memory	0.529451	0.308593	0.951784	4312
BRCA	MMP1	NKT	-0.0689918	0.980415	0.99508	4312
BRCA	MMP1	MAIT	-0.0491257	0.816963	0.967236	4312
BRCA	MMP1	DC	0.346043	0.0615932	0.675187	4312
BRCA	MMP1	Bcell	0.181501	0.269348	0.944883	4312
BRCA	MMP1	Monocyte	0.210993	0.119311	0.7328	4312
BRCA	MMP1	Macrophage	0.482242	0.0187416	0.928333	4312
BRCA	MMP1	NK	-0.121909	0.862766	0.992275	4312
BRCA	MMP1	Neutrophil	0.111097	0.708378	0.963589	4312
BRCA	MMP1	Gamma_delta	0.257875	0.335578	0.823867	4312
BRCA	MMP1	CD4_T	-0.900802	0.0104183	0.567287	4312
BRCA	MMP1	CD8_T	-0.249897	0.23043	0.746417	4312
BRCA	MMP1	InfiltrationScore	0.0694638	0.33854	0.878376	4312
BRCA	MMP10	CD4_naive		0.860932	0.888362	4319
BRCA	MMP10	CD8_naive	-0.785448	0.236411	0.801901	4319
BRCA	MMP10	Cytotoxic	0.0010542	0.861096	0.961526	4319
BRCA	MMP10	Exhausted	0.375808	0.305574	0.60607	4319
BRCA	MMP10	Tr1	0.408065	0.318253	0.941336	4319
BRCA	MMP10	nTreg	0.261747	0.360696	0.905568	4319
BRCA	MMP10	iTreg	0.0463885	0.978943	0.998959	4319
BRCA	MMP10	Th1	0.118581	0.718317	0.880719	4319
BRCA	MMP10	Th2	0.015457	0.912819	0.975894	4319
BRCA	MMP10	Th17	-0.43643	0.191218	0.62613	4319
BRCA	MMP10	Tfh	0.000422234	0.867247	0.973536	4319
BRCA	MMP10	Central_memory	0.0759693	0.88726	0.971235	4319
BRCA	MMP10	Effector_memory	-0.896824	0.388263	0.956884	4319
BRCA	MMP10	NKT	0.192057	0.951407	0.988564	4319
BRCA	MMP10	MAIT	0.315124	0.080658	0.638476	4319
BRCA	MMP10	DC	0.215413	0.296925	0.806507	4319
BRCA	MMP10	Bcell	0.261729	0.380015	0.950364	4319
BRCA	MMP10	Monocyte	0.0882893	0.591492	0.918712	4319
BRCA	MMP10	Macrophage	-0.0529999	0.776805	0.989467	4319
BRCA	MMP10	NK	-0.380167	0.225834	0.901402	4319
BRCA	MMP10	Neutrophil	-0.0631513	0.670667	0.954527	4319
BRCA	MMP10	Gamma_delta	0.293472	0.212978	0.751981	4319
BRCA	MMP10	CD4_T	-0.474206	0.219151	0.764451	4319
BRCA	MMP10	CD8_T	0.130448	0.388043	0.833458	4319
BRCA	MMP10	InfiltrationScore	-0.0422047	0.579397	0.939821	4319
BRCA	MMP13	CD4_naive		0.838377	0.888362	4322
BRCA	MMP13	CD8_naive	0.392631	0.189163	0.768578	4322
BRCA	MMP13	Cytotoxic	0.0170205	0.692443	0.896207	4322
BRCA	MMP13	Exhausted	0.173982	0.332101	0.63024	4322
BRCA	MMP13	Tr1	-0.394131	0.476892	0.9512	4322
BRCA	MMP13	nTreg	-0.348747	0.509361	0.937241	4322
BRCA	MMP13	iTreg	0.0218621	0.700574	0.933564	4322
BRCA	MMP13	Th1	-0.29591	0.719505	0.881422	4322
BRCA	MMP13	Th2	-0.276846	0.0360572	0.424086	4322
BRCA	MMP13	Th17	-0.0680902	0.693064	0.912098	4322
BRCA	MMP13	Tfh	0.0630177	0.644974	0.898143	4322
BRCA	MMP13	Central_memory	0.36603	0.326588	0.713962	4322
BRCA	MMP13	Effector_memory	-0.192426	0.858605	0.997167	4322
BRCA	MMP13	NKT	-0.680898	0.315339	0.670341	4322
BRCA	MMP13	MAIT	-0.0690274	0.70435	0.940545	4322
BRCA	MMP13	DC	0.295053	0.0802807	0.690952	4322
BRCA	MMP13	Bcell	-0.208886	0.485209	0.957307	4322
BRCA	MMP13	Monocyte	-0.0131011	0.751412	0.958571	4322
BRCA	MMP13	Macrophage	0.111812	0.518117	0.968779	4322
BRCA	MMP13	NK	-0.138787	0.451979	0.944665	4322
BRCA	MMP13	Neutrophil	0.00155615	0.697446	0.960239	4322
BRCA	MMP13	Gamma_delta	-0.0471925	0.854169	0.972554	4322
BRCA	MMP13	CD4_T	-0.214413	0.3143	0.819018	4322
BRCA	MMP13	CD8_T	-0.0833091	0.709389	0.944141	4322
BRCA	MMP13	InfiltrationScore	-0.0188628	0.722673	0.968913	4322
BRCA	MMP14	CD4_naive		0.801045	0.888362	4323
BRCA	MMP14	CD8_naive	0.142475	0.567865	0.921514	4323
BRCA	MMP14	Cytotoxic	-0.025393	0.638828	0.870326	4323
BRCA	MMP14	Exhausted	0.166388	0.534146	0.772556	4323
BRCA	MMP14	Tr1	-0.117009	0.937039	0.998798	4323
BRCA	MMP14	nTreg	-0.0500405	0.823604	0.983209	4323
BRCA	MMP14	iTreg	0.33584	0.16325	0.708767	4323
BRCA	MMP14	Th1	-0.0731689	0.797318	0.919743	4323
BRCA	MMP14	Th2	0.107886	0.329037	0.689679	4323
BRCA	MMP14	Th17	-0.171446	0.522858	0.839429	4323
BRCA	MMP14	Tfh	-0.0984386	0.637842	0.894874	4323
BRCA	MMP14	Central_memory	-0.0260308	0.882755	0.969068	4323
BRCA	MMP14	Effector_memory	0.00500048	0.892492	1	4323
BRCA	MMP14	NKT	-0.846653	0.259199	0.622183	4323
BRCA	MMP14	MAIT	0.102411	0.498393	0.884718	4323
BRCA	MMP14	DC	-0.0831996	0.602663	0.921508	4323
BRCA	MMP14	Bcell	0.399605	0.167679	0.93519	4323
BRCA	MMP14	Monocyte	-0.104583	0.388007	0.854942	4323
BRCA	MMP14	Macrophage	-0.090215	0.566995	0.973394	4323
BRCA	MMP14	NK	-0.03674	0.988954	1	4323
BRCA	MMP14	Neutrophil	0.000942995	0.993372	0.99966	4323
BRCA	MMP14	Gamma_delta	-0.153838	0.483141	0.883484	4323
BRCA	MMP14	CD4_T	-0.0167814	0.9608	0.994331	4323
BRCA	MMP14	CD8_T	0.0264937	0.794111	0.962317	4323
BRCA	MMP14	InfiltrationScore	-0.00840642	0.913455	0.992898	4323
BRCA	MMP2	CD4_naive		0.838377	0.888362	4313
BRCA	MMP2	CD8_naive	0.355088	0.28161	0.817383	4313
BRCA	MMP2	Cytotoxic	-0.0132847	0.876155	0.967045	4313
BRCA	MMP2	Exhausted	-0.0296718	0.718845	0.876854	4313
BRCA	MMP2	Tr1	-0.799248	0.189097	0.922337	4313
BRCA	MMP2	nTreg	0.186563	0.484679	0.934116	4313
BRCA	MMP2	iTreg	0.19791	0.626834	0.909659	4313
BRCA	MMP2	Th1	0.170766	0.451469	0.721536	4313
BRCA	MMP2	Th2	-0.219475	0.0357579	0.424086	4313
BRCA	MMP2	Th17	-0.0247655	0.993918	0.999782	4313
BRCA	MMP2	Tfh	0.010147	0.899574	0.983009	4313
BRCA	MMP2	Central_memory	0.556028	0.0786284	0.467736	4313
BRCA	MMP2	Effector_memory	0.474288	0.261607	0.935925	4313
BRCA	MMP2	NKT	-1.8822	0.0594734	0.35526	4313
BRCA	MMP2	MAIT	0.171814	0.27493	0.785427	4313
BRCA	MMP2	DC	0.00332186	0.95542	0.994881	4313
BRCA	MMP2	Bcell	-0.234583	0.42003	0.950364	4313
BRCA	MMP2	Monocyte	-0.12028	0.342373	0.839913	4313
BRCA	MMP2	Macrophage	-0.140499	0.450959	0.955215	4313
BRCA	MMP2	NK	-0.317046	0.194725	0.896897	4313
BRCA	MMP2	Neutrophil	0.0996497	0.656556	0.952681	4313
BRCA	MMP2	Gamma_delta	0.0248378	0.947325	0.992462	4313
BRCA	MMP2	CD4_T	-0.09712	0.815161	0.963484	4313
BRCA	MMP2	CD8_T	-0.146515	0.450447	0.859898	4313
BRCA	MMP2	InfiltrationScore	-0.120752	0.0342197	0.771897	4313
BRCA	MMP3	CD4_naive		0.838377	0.888362	4314
BRCA	MMP3	CD8_naive	0.392631	0.298602	0.825584	4314
BRCA	MMP3	Cytotoxic	0.166126	0.16819	0.544434	4314
BRCA	MMP3	Exhausted	0.32717	0.357176	0.648401	4314
BRCA	MMP3	Tr1	-0.00838593	0.865355	0.996826	4314
BRCA	MMP3	nTreg	0.260691	0.362978	0.906049	4314
BRCA	MMP3	iTreg	0.328191	0.307417	0.788132	4314
BRCA	MMP3	Th1	0.210011	0.316353	0.616495	4314
BRCA	MMP3	Th2	-0.335561	0.00945485	0.338811	4314
BRCA	MMP3	Th17	0.0553105	0.902925	0.979294	4314
BRCA	MMP3	Tfh	0.178748	0.473134	0.815975	4314
BRCA	MMP3	Central_memory	0.316087	0.415577	0.767613	4314
BRCA	MMP3	Effector_memory	0.583277	0.329915	0.954527	4314
BRCA	MMP3	NKT	-1.9367	0.0554497	0.346574	4314
BRCA	MMP3	MAIT	-0.0883207	0.49267	0.882663	4314
BRCA	MMP3	DC	0.137293	0.412757	0.859874	4314
BRCA	MMP3	Bcell	-0.171174	0.6401	0.974745	4314
BRCA	MMP3	Monocyte	-0.0694016	0.553248	0.907819	4314
BRCA	MMP3	Macrophage	0.130397	0.428895	0.953331	4314
BRCA	MMP3	NK	-0.105913	0.498572	0.95213	4314
BRCA	MMP3	Neutrophil	-0.0761297	0.538049	0.926097	4314
BRCA	MMP3	Gamma_delta	0.151868	0.594193	0.917323	4314
BRCA	MMP3	CD4_T	-0.348701	0.320037	0.821127	4314
BRCA	MMP3	CD8_T	0.235578	0.139634	0.678516	4314
BRCA	MMP3	InfiltrationScore	-0.00587339	0.993242	0.999799	4314
BRCA	MMP9	CD4_naive		0.801045	0.888362	4318
BRCA	MMP9	CD8_naive	0.302494	0.366243	0.850713	4318
BRCA	MMP9	Cytotoxic	-0.100067	0.267743	0.63649	4318
BRCA	MMP9	Exhausted	-0.940502	0.0859945	0.383083	4318
BRCA	MMP9	Tr1	0.199539	0.981757	0.999635	4318
BRCA	MMP9	nTreg	-0.146099	0.190974	0.850789	4318
BRCA	MMP9	iTreg	-0.182737	0.496627	0.866317	4318
BRCA	MMP9	Th1	-0.248203	0.20032	0.503813	4318
BRCA	MMP9	Th2	-0.0228231	0.59019	0.846834	4318
BRCA	MMP9	Th17	0.0990982	0.697756	0.914796	4318
BRCA	MMP9	Tfh	0.0255514	0.701351	0.920422	4318
BRCA	MMP9	Central_memory	0.12346	0.714681	0.912861	4318
BRCA	MMP9	Effector_memory	-0.347336	0.598904	0.982128	4318
BRCA	MMP9	NKT	0.0955271	0.917952	0.976594	4318
BRCA	MMP9	MAIT	0.183582	0.200799	0.734167	4318
BRCA	MMP9	DC	-0.0850776	0.662248	0.929183	4318
BRCA	MMP9	Bcell	-0.265624	0.199084	0.93519	4318
BRCA	MMP9	Monocyte	0.0273594	0.931044	0.989398	4318
BRCA	MMP9	Macrophage	0.0706082	0.920047	0.998079	4318
BRCA	MMP9	NK	-0.0339198	0.736549	0.981694	4318
BRCA	MMP9	Neutrophil	-0.0164214	0.665769	0.954205	4318
BRCA	MMP9	Gamma_delta	-0.113142	0.959144	0.993489	4318
BRCA	MMP9	CD4_T	0.120753	0.548383	0.899728	4318
BRCA	MMP9	CD8_T	-0.132896	0.481424	0.872906	4318
BRCA	MMP9	InfiltrationScore	-0.0232637	0.553476	0.938329	4318
BRCA	SERPINE1	CD4_naive		0.801141	0.888362	5054
BRCA	SERPINE1	CD8_naive	0.211954	0.432417	0.87553	5054
BRCA	SERPINE1	Cytotoxic	0.0225707	0.979035	0.994882	5054
BRCA	SERPINE1	Exhausted	0.266221	0.342313	0.636251	5054
BRCA	SERPINE1	Tr1	-0.211255	0.561387	0.963793	5054
BRCA	SERPINE1	nTreg	-0.16027	0.634204	0.9635	5054
BRCA	SERPINE1	iTreg	-0.189411	0.563617	0.888433	5054
BRCA	SERPINE1	Th1	-0.0515007	0.783131	0.913007	5054
BRCA	SERPINE1	Th2	0.0320181	0.91738	0.977512	5054
BRCA	SERPINE1	Th17	0.101586	0.783127	0.943737	5054
BRCA	SERPINE1	Tfh	-0.401057	0.0758611	0.502191	5054
BRCA	SERPINE1	Central_memory	-0.772888	0.0571471	0.425917	5054
BRCA	SERPINE1	Effector_memory	-0.610068	0.448054	0.969824	5054
BRCA	SERPINE1	NKT	0.23993	0.452247	0.761207	5054
BRCA	SERPINE1	MAIT	0.0715988	0.670605	0.931056	5054
BRCA	SERPINE1	DC	0.438628	0.00377565	0.636162	5054
BRCA	SERPINE1	Bcell	-0.0866401	0.661044	0.979487	5054
BRCA	SERPINE1	Monocyte	0.297983	0.0370607	0.712112	5054
BRCA	SERPINE1	Macrophage	0.293517	0.0477097	0.928333	5054
BRCA	SERPINE1	NK	-0.305472	0.186773	0.896897	5054
BRCA	SERPINE1	Neutrophil	0.175746	0.105603	0.760813	5054
BRCA	SERPINE1	Gamma_delta	-0.0468269	0.754062	0.952846	5054
BRCA	SERPINE1	CD4_T	-0.376208	0.0391807	0.571164	5054
BRCA	SERPINE1	CD8_T	-0.187672	0.120857	0.657813	5054
BRCA	SERPINE1	InfiltrationScore	0.0567539	0.149131	0.815632	5054
BRCA	SPP1	CD4_naive		0.818699	0.888362	6696
BRCA	SPP1	CD8_naive	0.312004	0.343338	0.843147	6696
BRCA	SPP1	Cytotoxic	0.128184	0.231095	0.604509	6696
BRCA	SPP1	Exhausted	0.342017	0.201783	0.512976	6696
BRCA	SPP1	Tr1	0.341208	0.297922	0.937552	6696
BRCA	SPP1	nTreg	0.227631	0.224932	0.867198	6696
BRCA	SPP1	iTreg	0.261312	0.208584	0.741675	6696
BRCA	SPP1	Th1	0.00609162	0.989115	0.998116	6696
BRCA	SPP1	Th2	-0.111917	0.147713	0.534933	6696
BRCA	SPP1	Th17	-0.143652	0.655285	0.896642	6696
BRCA	SPP1	Tfh	-0.152288	0.510126	0.834596	6696
BRCA	SPP1	Central_memory	-0.290541	0.46305	0.792679	6696
BRCA	SPP1	Effector_memory	-0.119579	0.975659	1	6696
BRCA	SPP1	NKT	-0.719264	0.328939	0.681097	6696
BRCA	SPP1	MAIT	0.166563	0.330827	0.820141	6696
BRCA	SPP1	DC	0.0518078	0.670682	0.931605	6696
BRCA	SPP1	Bcell	-0.153229	0.635149	0.974294	6696
BRCA	SPP1	Monocyte	-0.0206224	0.755407	0.959847	6696
BRCA	SPP1	Macrophage	0.0231496	0.973396	0.99973	6696
BRCA	SPP1	NK	-0.0109867	0.886093	0.995766	6696
BRCA	SPP1	Neutrophil	-0.0653335	0.739331	0.970574	6696
BRCA	SPP1	Gamma_delta	0.303612	0.162893	0.720178	6696
BRCA	SPP1	CD4_T	-0.362476	0.103346	0.673134	6696
BRCA	SPP1	CD8_T	0.050139	0.88669	0.979951	6696
BRCA	SPP1	InfiltrationScore	-0.0372811	0.614772	0.946438	6696
BRCA	TNFRSF11B	CD4_naive		0.818699	0.888362	4982
BRCA	TNFRSF11B	CD8_naive	0.288275	0.656328	0.943822	4982
BRCA	TNFRSF11B	Cytotoxic	-0.100227	0.325585	0.685286	4982
BRCA	TNFRSF11B	Exhausted	0.0250547	0.724482	0.879746	4982
BRCA	TNFRSF11B	Tr1	5.9596e-05	0.913005	0.9978	4982
BRCA	TNFRSF11B	nTreg	0.177424	0.405692	0.913678	4982
BRCA	TNFRSF11B	iTreg	-0.0545029	0.678429	0.928029	4982
BRCA	TNFRSF11B	Th1	0.0212999	0.910685	0.967882	4982
BRCA	TNFRSF11B	Th2	0.0307363	0.551351	0.826693	4982
BRCA	TNFRSF11B	Th17	0.05421	0.898675	0.979294	4982
BRCA	TNFRSF11B	Tfh	-0.176593	0.521387	0.840617	4982
BRCA	TNFRSF11B	Central_memory	-0.214385	0.526234	0.825074	4982
BRCA	TNFRSF11B	Effector_memory	-0.0470946	0.944054	1	4982
BRCA	TNFRSF11B	NKT	0.0509776	0.94471	0.986703	4982
BRCA	TNFRSF11B	MAIT	0.195291	0.333094	0.821318	4982
BRCA	TNFRSF11B	DC	0.137435	0.313781	0.812641	4982
BRCA	TNFRSF11B	Bcell	-0.104973	0.680647	0.982554	4982
BRCA	TNFRSF11B	Monocyte	0.0383899	0.764064	0.961652	4982
BRCA	TNFRSF11B	Macrophage	0.0377708	0.855062	0.993971	4982
BRCA	TNFRSF11B	NK	-0.269885	0.322983	0.913429	4982
BRCA	TNFRSF11B	Neutrophil	0.00561517	0.973396	0.998263	4982
BRCA	TNFRSF11B	Gamma_delta	-0.229875	0.474759	0.881648	4982
BRCA	TNFRSF11B	CD4_T	-0.354378	0.188748	0.741881	4982
BRCA	TNFRSF11B	CD8_T	-0.261353	0.157266	0.693019	4982
BRCA	TNFRSF11B	InfiltrationScore	-0.0907134	0.100809	0.796092	4982
CESC	ICAM1	CD4_naive		0.570086	0.648908	3383
CESC	ICAM1	CD8_naive	-0.00675357	1	1	3383
CESC	ICAM1	Cytotoxic	0.047618	0.959228	0.994334	3383
CESC	ICAM1	Exhausted	0.421328	0.45538	0.636985	3383
CESC	ICAM1	Tr1	0.393437	0.445578	1	3383
CESC	ICAM1	nTreg	-0.720943	0.368611	0.993129	3383
CESC	ICAM1	iTreg	0.227456	0.624187	0.998989	3383
CESC	ICAM1	Th1	0.108944	0.949048	0.988617	3383
CESC	ICAM1	Th2	-0.0910492	0.752566	0.975357	3383
CESC	ICAM1	Th17	0.268601	0.553736	0.875449	3383
CESC	ICAM1	Tfh	0.0522967	0.925329	0.991668	3383
CESC	ICAM1	Central_memory	-0.143095	0.821242	0.927833	3383
CESC	ICAM1	Effector_memory	0.4288	0.623203	0.841587	3383
CESC	ICAM1	NKT	0.467024	0.329397	0.843899	3383
CESC	ICAM1	MAIT	-0.181298	0.624178	0.997401	3383
CESC	ICAM1	DC	0.109652	0.698252	0.998678	3383
CESC	ICAM1	Bcell	-0.195722	0.576763	1	3383
CESC	ICAM1	Monocyte	0.257266	0.394173	0.772087	3383
CESC	ICAM1	Macrophage	0.223363	0.415826	0.702313	3383
CESC	ICAM1	NK	-0.081452	0.70774	0.992749	3383
CESC	ICAM1	Neutrophil	-0.282241	0.498166	1	3383
CESC	ICAM1	Gamma_delta	0.0117189	0.979607	0.999063	3383
CESC	ICAM1	CD4_T	0.125041	0.670085	0.922278	3383
CESC	ICAM1	CD8_T	-0.0285455	0.844634	0.984831	3383
CESC	ICAM1	InfiltrationScore	0.043688	0.70774	0.977785	3383
CESC	ICAM3	CD4_naive		0.418321	0.648908	3385
CESC	ICAM3	CD8_naive	-0.54372	0.259811	0.811357	3385
CESC	ICAM3	Cytotoxic	0.213005	0.181049	0.873792	3385
CESC	ICAM3	Exhausted	0.582706	0.170881	0.36283	3385
CESC	ICAM3	Tr1	-0.576817	0.261013	1	3385
CESC	ICAM3	nTreg	-0.848803	0.149796	0.993129	3385
CESC	ICAM3	iTreg	0.0300656	0.920811	0.998989	3385
CESC	ICAM3	Th1	0.421016	0.0417064	0.519399	3385
CESC	ICAM3	Th2	0.349469	0.248584	0.876454	3385
CESC	ICAM3	Th17	-0.30676	0.499801	0.856232	3385
CESC	ICAM3	Tfh	0.158338	0.53687	0.942508	3385
CESC	ICAM3	Central_memory	-0.254781	0.560693	0.776092	3385
CESC	ICAM3	Effector_memory	0.332839	0.884706	0.972193	3385
CESC	ICAM3	NKT	-0.84336	0.407224	0.889597	3385
CESC	ICAM3	MAIT	0.187902	0.480845	0.997401	3385
CESC	ICAM3	DC	0.0135347	0.868403	0.998678	3385
CESC	ICAM3	Bcell	-0.108699	0.677593	1	3385
CESC	ICAM3	Monocyte	-0.148743	0.509407	0.83503	3385
CESC	ICAM3	Macrophage	0.0620747	0.858932	0.951192	3385
CESC	ICAM3	NK	0.19801	0.284879	0.921029	3385
CESC	ICAM3	Neutrophil	-0.14116	0.644859	1	3385
CESC	ICAM3	Gamma_delta	0.335203	0.0805858	0.986687	3385
CESC	ICAM3	CD4_T	-0.514387	0.0963249	0.747525	3385
CESC	ICAM3	CD8_T	0.332684	0.0963315	0.908793	3385
CESC	ICAM3	InfiltrationScore	0.0249247	0.783982	0.980017	3385
CESC	ITGA2	CD4_naive		0.364105	0.648908	3673
CESC	ITGA2	CD8_naive	-0.958304	0.0580768	0.740943	3673
CESC	ITGA2	Cytotoxic	0.191165	0.245788	0.893924	3673
CESC	ITGA2	Exhausted	0.646427	0.0710257	0.25413	3673
CESC	ITGA2	Tr1	0.299238	0.467654	1	3673
CESC	ITGA2	nTreg	0.205987	0.650151	0.99396	3673
CESC	ITGA2	iTreg	-0.0152591	0.933315	0.998989	3673
CESC	ITGA2	Th1	0.0527674	0.841684	0.949683	3673
CESC	ITGA2	Th2	-0.174241	0.578184	0.961822	3673
CESC	ITGA2	Th17	0.0112417	0.941903	0.994171	3673
CESC	ITGA2	Tfh	0.178498	0.556253	0.947508	3673
CESC	ITGA2	Central_memory	-1.03683	0.0862933	0.310807	3673
CESC	ITGA2	Effector_memory	-0.0743812	0.828564	0.947415	3673
CESC	ITGA2	NKT	0.541405	0.915822	0.990623	3673
CESC	ITGA2	MAIT	0.255117	0.203601	0.989199	3673
CESC	ITGA2	DC	0.163664	0.348951	0.998678	3673
CESC	ITGA2	Bcell	0.166882	0.479423	1	3673
CESC	ITGA2	Monocyte	0.131372	0.281471	0.705695	3673
CESC	ITGA2	Macrophage	0.292523	0.12997	0.46454	3673
CESC	ITGA2	NK	-0.0365805	0.729724	0.992749	3673
CESC	ITGA2	Neutrophil	-0.215857	0.474428	1	3673
CESC	ITGA2	Gamma_delta	-0.00387346	0.677638	0.991299	3673
CESC	ITGA2	CD4_T	-0.0560203	0.735808	0.943948	3673
CESC	ITGA2	CD8_T	0.288133	0.246881	0.921637	3673
CESC	ITGA2	InfiltrationScore	0.110345	0.178018	0.912019	3673
CESC	MMP1	CD4_naive		0.363138	0.648908	4312
CESC	MMP1	CD8_naive	-1.0435	0.0514392	0.740943	4312
CESC	MMP1	Cytotoxic	0.241494	0.0631545	0.810531	4312
CESC	MMP1	Exhausted	0.775193	0.0263396	0.194422	4312
CESC	MMP1	Tr1	0.651675	0.0278015	1	4312
CESC	MMP1	nTreg	0.633563	0.0527393	0.993129	4312
CESC	MMP1	iTreg	0.432126	0.0408526	0.991238	4312
CESC	MMP1	Th1	0.23855	0.245236	0.67242	4312
CESC	MMP1	Th2	-0.197434	0.64907	0.969648	4312
CESC	MMP1	Th17	-0.557872	0.130681	0.555927	4312
CESC	MMP1	Tfh	0.363084	0.146555	0.788982	4312
CESC	MMP1	Central_memory	0.321207	0.428668	0.684115	4312
CESC	MMP1	Effector_memory	-0.784272	0.234143	0.556482	4312
CESC	MMP1	NKT	-0.0336331	0.781458	0.97736	4312
CESC	MMP1	MAIT	-0.662299	0.0213123	0.989199	4312
CESC	MMP1	DC	0.117158	0.375764	0.998678	4312
CESC	MMP1	Bcell	-3.1405e-05	0.993516	1	4312
CESC	MMP1	Monocyte	0.0821002	0.466215	0.811135	4312
CESC	MMP1	Macrophage	0.283906	0.0979354	0.458085	4312
CESC	MMP1	NK	0.221138	0.183544	0.897271	4312
CESC	MMP1	Neutrophil	-0.478829	0.167151	1	4312
CESC	MMP1	Gamma_delta	0.139714	0.24522	0.986687	4312
CESC	MMP1	CD4_T	0.205569	0.267923	0.796184	4312
CESC	MMP1	CD8_T	0.0771471	0.608698	0.952693	4312
CESC	MMP1	InfiltrationScore	0.11838	0.0627711	0.912019	4312
CESC	MMP10	CD4_naive		0.570086	0.648908	4319
CESC	MMP10	CD8_naive	-0.416396	0.373189	0.841808	4319
CESC	MMP10	Cytotoxic	0.127842	0.59142	0.941148	4319
CESC	MMP10	Exhausted	0.690242	0.199164	0.394232	4319
CESC	MMP10	Tr1	-0.809561	0.29058	1	4319
CESC	MMP10	nTreg	-0.365605	0.645379	0.99396	4319
CESC	MMP10	iTreg	-0.444067	0.262528	0.991238	4319
CESC	MMP10	Th1	0.583436	0.0321231	0.519399	4319
CESC	MMP10	Th2	0.52348	0.0784958	0.80206	4319
CESC	MMP10	Th17	-1.14613	0.0688939	0.459348	4319
CESC	MMP10	Tfh	-0.453526	0.260725	0.833901	4319
CESC	MMP10	Central_memory	-2.41566	0.082721	0.304994	4319
CESC	MMP10	Effector_memory	0.694553	0.159845	0.47847	4319
CESC	MMP10	NKT	-0.15843	0.891119	0.989401	4319
CESC	MMP10	MAIT	-0.181298	0.559446	0.997401	4319
CESC	MMP10	DC	0.283019	0.185194	0.998678	4319
CESC	MMP10	Bcell	0.0144642	0.97281	1	4319
CESC	MMP10	Monocyte	0.301263	0.246529	0.675973	4319
CESC	MMP10	Macrophage	0.509066	0.0891701	0.455439	4319
CESC	MMP10	NK	0.29263	0.208846	0.906308	4319
CESC	MMP10	Neutrophil	0.0209553	0.8413	1	4319
CESC	MMP10	Gamma_delta	0.147835	0.440636	0.986687	4319
CESC	MMP10	CD4_T	-1.29686	0.0285387	0.747525	4319
CESC	MMP10	CD8_T	-0.0713374	0.891563	0.985425	4319
CESC	MMP10	InfiltrationScore	0.146632	0.243096	0.912019	4319
CESC	MMP2	CD4_naive		0.280515	0.648908	4313
CESC	MMP2	CD8_naive	0.16237	0.533426	0.89789	4313
CESC	MMP2	Cytotoxic	0.138203	0.203073	0.88249	4313
CESC	MMP2	Exhausted	0.212218	0.649937	0.78931	4313
CESC	MMP2	Tr1	-0.141612	0.757207	1	4313
CESC	MMP2	nTreg	-0.0838201	0.799369	0.99396	4313
CESC	MMP2	iTreg	0.0622121	0.695448	0.998989	4313
CESC	MMP2	Th1	0.226377	0.24023	0.670701	4313
CESC	MMP2	Th2	0.335723	0.145388	0.808547	4313
CESC	MMP2	Th17	0.0615535	0.815364	0.972178	4313
CESC	MMP2	Tfh	0.0531767	0.97991	1	4313
CESC	MMP2	Central_memory	-0.196828	0.663367	0.836939	4313
CESC	MMP2	Effector_memory	0.131325	0.723679	0.893242	4313
CESC	MMP2	NKT	-0.0533516	0.663966	0.965701	4313
CESC	MMP2	MAIT	0.0234538	0.675248	0.997401	4313
CESC	MMP2	DC	-0.0587686	0.437702	0.998678	4313
CESC	MMP2	Bcell	-0.297695	0.332826	1	4313
CESC	MMP2	Monocyte	-0.00756358	1	1	4313
CESC	MMP2	Macrophage	-0.158096	0.350292	0.654879	4313
CESC	MMP2	NK	0.255023	0.0712382	0.874007	4313
CESC	MMP2	Neutrophil	-0.16404	0.493653	1	4313
CESC	MMP2	Gamma_delta	0.0635949	0.609679	0.987714	4313
CESC	MMP2	CD4_T	-0.0710427	0.512623	0.877061	4313
CESC	MMP2	CD8_T	0.0751463	0.619342	0.956057	4313
CESC	MMP2	InfiltrationScore	-0.0117429	0.620963	0.970971	4313
CESC	MMP3	CD4_naive		0.484146	0.648908	4314
CESC	MMP3	CD8_naive	-0.944682	0.117632	0.752655	4314
CESC	MMP3	Cytotoxic	0.240435	0.120163	0.854415	4314
CESC	MMP3	Exhausted	0.13935	0.766803	0.867557	4314
CESC	MMP3	Tr1	-1.01814	0.108085	1	4314
CESC	MMP3	nTreg	-0.95562	0.226521	0.993129	4314
CESC	MMP3	iTreg	0.106337	0.704082	0.998989	4314
CESC	MMP3	Th1	0.24614	0.230653	0.66512	4314
CESC	MMP3	Th2	0.132695	0.740619	0.971369	4314
CESC	MMP3	Th17	-0.215611	0.567683	0.881397	4314
CESC	MMP3	Tfh	0.313986	0.303985	0.858248	4314
CESC	MMP3	Central_memory	0.327741	0.498741	0.732212	4314
CESC	MMP3	Effector_memory	-0.113456	0.949846	0.979581	4314
CESC	MMP3	NKT	-0.577389	0.573215	0.944601	4314
CESC	MMP3	MAIT	0.498917	0.0883829	0.989199	4314
CESC	MMP3	DC	0.163351	0.455852	0.998678	4314
CESC	MMP3	Bcell	-0.329518	0.287852	1	4314
CESC	MMP3	Monocyte	-0.192879	0.598759	0.878062	4314
CESC	MMP3	Macrophage	-0.0617625	0.714462	0.886161	4314
CESC	MMP3	NK	0.148728	0.496836	0.972937	4314
CESC	MMP3	Neutrophil	-0.145016	0.70408	1	4314
CESC	MMP3	Gamma_delta	0.407772	0.0321086	0.986687	4314
CESC	MMP3	CD4_T	-0.00490261	0.913977	0.983741	4314
CESC	MMP3	CD8_T	0.0417426	0.848016	0.984831	4314
CESC	MMP3	InfiltrationScore	0.0101855	0.991659	1	4314
CESC	MMP9	CD4_naive		0.570855	0.648908	4318
CESC	MMP9	CD8_naive	0.0734309	0.855127	0.972214	4318
CESC	MMP9	Cytotoxic	0.268991	0.17162	0.869676	4318
CESC	MMP9	Exhausted	-0.654648	0.426679	0.612644	4318
CESC	MMP9	Tr1	0.379087	0.462533	1	4318
CESC	MMP9	nTreg	-1.8916	0.096856	0.993129	4318
CESC	MMP9	iTreg	0.366952	0.226297	0.991238	4318
CESC	MMP9	Th1	0.117923	0.702396	0.903164	4318
CESC	MMP9	Th2	0.110116	0.81867	0.986997	4318
CESC	MMP9	Th17	0.165031	0.595638	0.890966	4318
CESC	MMP9	Tfh	0.277217	0.552276	0.945684	4318
CESC	MMP9	Central_memory	0.59601	0.299922	0.572658	4318
CESC	MMP9	Effector_memory	-1.67922	0.167774	0.486031	4318
CESC	MMP9	NKT	0.23768	0.511526	0.921805	4318
CESC	MMP9	MAIT	0.404274	0.226285	0.989199	4318
CESC	MMP9	DC	0.0101035	0.912107	0.998678	4318
CESC	MMP9	Bcell	-0.0912474	0.821962	1	4318
CESC	MMP9	Monocyte	0.212245	0.470447	0.814566	4318
CESC	MMP9	Macrophage	0.107501	0.756628	0.906558	4318
CESC	MMP9	NK	0.324159	0.150098	0.88218	4318
CESC	MMP9	Neutrophil	-0.344295	0.337318	1	4318
CESC	MMP9	Gamma_delta	-0.127134	0.586832	0.986687	4318
CESC	MMP9	CD4_T	0.330684	0.442224	0.864352	4318
CESC	MMP9	CD8_T	0.0390883	0.942464	0.994255	4318
CESC	MMP9	InfiltrationScore	0.114898	0.405355	0.924067	4318
CESC	SPP1	CD4_naive	1.47334	0.461525	0.648908	6696
CESC	SPP1	CD8_naive	-0.379846	0.438928	0.86726	6696
CESC	SPP1	Cytotoxic	0.153036	0.315558	0.893924	6696
CESC	SPP1	Exhausted	0.151449	0.732328	0.845699	6696
CESC	SPP1	Tr1	0.647026	0.0858717	1	6696
CESC	SPP1	nTreg	0.280606	0.490584	0.993129	6696
CESC	SPP1	iTreg	0.379188	0.154493	0.991238	6696
CESC	SPP1	Th1	0.194007	0.590512	0.842361	6696
CESC	SPP1	Th2	-0.394416	0.38066	0.91729	6696
CESC	SPP1	Th17	-0.557925	0.142603	0.570965	6696
CESC	SPP1	Tfh	0.319424	0.248183	0.825041	6696
CESC	SPP1	Central_memory	0.688915	0.128861	0.374556	6696
CESC	SPP1	Effector_memory	-0.0788959	0.941998	0.977587	6696
CESC	SPP1	NKT	-0.888645	0.486979	0.912242	6696
CESC	SPP1	MAIT	-0.0357876	0.863189	1	6696
CESC	SPP1	DC	0.0738643	0.511827	0.998678	6696
CESC	SPP1	Bcell	0.404852	0.164327	1	6696
CESC	SPP1	Monocyte	0.173168	0.314079	0.731366	6696
CESC	SPP1	Macrophage	0.0730199	0.435437	0.717347	6696
CESC	SPP1	NK	-0.139821	0.414384	0.955721	6696
CESC	SPP1	Neutrophil	-0.319039	0.231259	1	6696
CESC	SPP1	Gamma_delta	0.0118025	0.966241	0.999063	6696
CESC	SPP1	CD4_T	0.130773	0.484969	0.874467	6696
CESC	SPP1	CD8_T	0.26756	0.218559	0.921637	6696
CESC	SPP1	InfiltrationScore	0.0599251	0.288661	0.912019	6696
CESC	TIMP2	CD4_naive		0.485021	0.648908	7077
CESC	TIMP2	CD8_naive	-0.286351	0.507116	0.891652	7077
CESC	TIMP2	Cytotoxic	0.0748251	0.810644	0.97829	7077
CESC	TIMP2	Exhausted	0.484544	0.303421	0.497958	7077
CESC	TIMP2	Tr1	0.490133	0.408413	1	7077
CESC	TIMP2	nTreg	0.497824	0.257535	0.993129	7077
CESC	TIMP2	iTreg	-0.0071742	0.969531	0.999762	7077
CESC	TIMP2	Th1	-0.00469416	0.816031	0.937693	7077
CESC	TIMP2	Th2	-0.0747216	0.720594	0.970917	7077
CESC	TIMP2	Th17	0.0743332	0.773183	0.957307	7077
CESC	TIMP2	Tfh	-0.177289	0.487382	0.931255	7077
CESC	TIMP2	Central_memory	0.0609437	0.894943	0.962048	7077
CESC	TIMP2	Effector_memory	0.287724	0.673501	0.863665	7077
CESC	TIMP2	NKT	0.716035	0.107221	0.701004	7077
CESC	TIMP2	MAIT	-0.323108	0.308937	0.989199	7077
CESC	TIMP2	DC	0.130286	0.536511	0.998678	7077
CESC	TIMP2	Bcell	0.370964	0.190471	1	7077
CESC	TIMP2	Monocyte	0.135979	0.634258	0.899593	7077
CESC	TIMP2	Macrophage	0.309138	0.185843	0.522721	7077
CESC	TIMP2	NK	-0.0956146	0.571393	0.982998	7077
CESC	TIMP2	Neutrophil	0.0172513	0.958459	1	7077
CESC	TIMP2	Gamma_delta	-0.118998	0.697332	0.991299	7077
CESC	TIMP2	CD4_T	0.00950197	0.884042	0.977695	7077
CESC	TIMP2	CD8_T	-0.131888	0.68199	0.959922	7077
CESC	TIMP2	InfiltrationScore	0.0866642	0.394915	0.920949	7077
CESC	TNFRSF11B	CD4_naive	-0.222682	0.591787	0.666573	4982
CESC	TNFRSF11B	CD8_naive	-0.230733	0.546783	0.89789	4982
CESC	TNFRSF11B	Cytotoxic	0.0151729	0.896934	0.989636	4982
CESC	TNFRSF11B	Exhausted	0.698238	0.0781555	0.256534	4982
CESC	TNFRSF11B	Tr1	-0.0234639	0.776978	1	4982
CESC	TNFRSF11B	nTreg	0.430907	0.221214	0.993129	4982
CESC	TNFRSF11B	iTreg	0.0220162	0.983176	1	4982
CESC	TNFRSF11B	Th1	0.225488	0.44417	0.770861	4982
CESC	TNFRSF11B	Th2	-0.147329	0.47153	0.934372	4982
CESC	TNFRSF11B	Th17	-0.168822	0.587646	0.888119	4982
CESC	TNFRSF11B	Tfh	-0.137926	0.525019	0.939199	4982
CESC	TNFRSF11B	Central_memory	-0.422125	0.434936	0.689164	4982
CESC	TNFRSF11B	Effector_memory	0.130195	0.961443	0.984636	4982
CESC	TNFRSF11B	NKT	0.484798	0.224	0.796594	4982
CESC	TNFRSF11B	MAIT	0.0142189	0.985579	1	4982
CESC	TNFRSF11B	DC	0.245794	0.120796	0.998678	4982
CESC	TNFRSF11B	Bcell	-0.0776146	0.756329	1	4982
CESC	TNFRSF11B	Monocyte	0.252869	0.311424	0.728985	4982
CESC	TNFRSF11B	Macrophage	0.324325	0.0957375	0.456627	4982
CESC	TNFRSF11B	NK	-0.0908443	0.758637	0.992749	4982
CESC	TNFRSF11B	Neutrophil	-0.102267	0.866032	1	4982
CESC	TNFRSF11B	Gamma_delta	0.0651332	0.699785	0.991299	4982
CESC	TNFRSF11B	CD4_T	-0.210865	0.235246	0.778208	4982
CESC	TNFRSF11B	CD8_T	-0.0451371	0.788613	0.980153	4982
CESC	TNFRSF11B	InfiltrationScore	0.0727364	0.392254	0.920949	4982
COAD	FGF2	CD4_naive		0.847329	0.902917	2247
COAD	FGF2	CD8_naive	-1.53314	0.0625258	0.174937	2247
COAD	FGF2	Cytotoxic	0.444266	0.017287	0.0538931	2247
COAD	FGF2	Exhausted	0.628172	0.0124304	0.0438232	2247
COAD	FGF2	Tr1	-0.296398	0.444099	0.909592	2247
COAD	FGF2	nTreg	0.398702	0.0614703	0.261132	2247
COAD	FGF2	iTreg	0.0289978	0.957533	0.987268	2247
COAD	FGF2	Th1	0.58131	0.0148124	0.0549436	2247
COAD	FGF2	Th2	0.118237	0.520791	0.898887	2247
COAD	FGF2	Th17	-0.0673997	0.917669	0.980166	2247
COAD	FGF2	Tfh	0.333904	0.252897	0.745436	2247
COAD	FGF2	Central_memory	0.151594	0.911272	0.986544	2247
COAD	FGF2	Effector_memory	0.880772	0.0674746	0.337734	2247
COAD	FGF2	NKT	-0.831001	0.0793747	0.165544	2247
COAD	FGF2	MAIT	-0.285638	0.112258	0.978897	2247
COAD	FGF2	DC	0.170182	0.520789	0.664185	2247
COAD	FGF2	Bcell	-0.262222	0.440945	0.802732	2247
COAD	FGF2	Monocyte	-0.132191	0.295445	0.778801	2247
COAD	FGF2	Macrophage	0.171759	0.419017	0.578934	2247
COAD	FGF2	NK	0.344399	0.108081	0.217982	2247
COAD	FGF2	Neutrophil	-0.277586	0.237643	0.391223	2247
COAD	FGF2	Gamma_delta	0.17807	0.756059	0.909355	2247
COAD	FGF2	CD4_T	-0.0292797	0.995001	1	2247
COAD	FGF2	CD8_T	0.268978	0.197952	0.374199	2247
COAD	FGF2	InfiltrationScore	0.0918874	0.262135	0.4426	2247
COAD	ICAM1	CD4_naive		0.826836	0.902917	3383
COAD	ICAM1	CD8_naive	-0.546538	0.274191	0.429071	3383
COAD	ICAM1	Cytotoxic	0.109533	0.75497	0.805152	3383
COAD	ICAM1	Exhausted	0.137869	0.468738	0.543003	3383
COAD	ICAM1	Tr1	-0.449639	0.271675	0.880303	3383
COAD	ICAM1	nTreg	0.356048	0.144992	0.386698	3383
COAD	ICAM1	iTreg	0.22866	0.053126	0.326283	3383
COAD	ICAM1	Th1	0.282555	0.17038	0.26041	3383
COAD	ICAM1	Th2	0.0444495	0.889191	0.985199	3383
COAD	ICAM1	Th17	0.151267	0.357782	0.716836	3383
COAD	ICAM1	Tfh	0.307171	0.290901	0.765619	3383
COAD	ICAM1	Central_memory	0.0503373	0.588391	0.923463	3383
COAD	ICAM1	Effector_memory	0.429772	0.190951	0.497832	3383
COAD	ICAM1	NKT	-0.111805	0.584904	0.66542	3383
COAD	ICAM1	MAIT	0.0878177	0.451813	0.981097	3383
COAD	ICAM1	DC	0.206865	0.332181	0.501566	3383
COAD	ICAM1	Bcell	-0.297231	0.264979	0.693917	3383
COAD	ICAM1	Monocyte	-0.155975	0.155253	0.673165	3383
COAD	ICAM1	Macrophage	0.134173	0.525214	0.668282	3383
COAD	ICAM1	NK	-0.0062966	0.948898	0.966161	3383
COAD	ICAM1	Neutrophil	-0.177059	0.337765	0.491708	3383
COAD	ICAM1	Gamma_delta	-0.567558	0.10539	0.464559	3383
COAD	ICAM1	CD4_T	-0.272918	0.362178	0.781715	3383
COAD	ICAM1	CD8_T	0.0957341	0.514355	0.668486	3383
COAD	ICAM1	InfiltrationScore	-0.00915247	0.902418	0.945523	3383
COAD	ICAM3	CD4_naive		0.871789	0.902917	3385
COAD	ICAM3	CD8_naive	0.2377	0.585252	0.706022	3385
COAD	ICAM3	Cytotoxic	0.290586	0.112986	0.186368	3385
COAD	ICAM3	Exhausted	0.443945	0.0594769	0.116236	3385
COAD	ICAM3	Tr1	0.160965	0.95964	0.997995	3385
COAD	ICAM3	nTreg	0.508624	0.071035	0.279134	3385
COAD	ICAM3	iTreg	0.29464	0.0356216	0.285377	3385
COAD	ICAM3	Th1	0.622953	0.0284193	0.0804705	3385
COAD	ICAM3	Th2	-0.442825	0.110543	0.655282	3385
COAD	ICAM3	Th17	-0.281021	0.173471	0.545498	3385
COAD	ICAM3	Tfh	-0.342227	0.439738	0.851049	3385
COAD	ICAM3	Central_memory	-1.73847	0.599939	0.930369	3385
COAD	ICAM3	Effector_memory	0.35162	0.36696	0.664425	3385
COAD	ICAM3	NKT	-0.417099	0.249388	0.358008	3385
COAD	ICAM3	MAIT	0.0593132	0.831316	0.995739	3385
COAD	ICAM3	DC	0.532112	0.01931	0.12008	3385
COAD	ICAM3	Bcell	-0.858253	0.0224976	0.410626	3385
COAD	ICAM3	Monocyte	-0.00555894	0.88802	0.984369	3385
COAD	ICAM3	Macrophage	0.314246	0.165643	0.331568	3385
COAD	ICAM3	NK	0.109117	0.696602	0.786003	3385
COAD	ICAM3	Neutrophil	-0.0853905	0.696597	0.794032	3385
COAD	ICAM3	Gamma_delta	-1.12474	0.222893	0.592934	3385
COAD	ICAM3	CD4_T	-0.0652289	0.974079	0.995851	3385
COAD	ICAM3	CD8_T	-0.00595574	0.928081	0.959403	3385
COAD	ICAM3	InfiltrationScore	0.101204	0.308632	0.490098	3385
COAD	ITGA2	CD4_naive		0.723119	0.902917	3673
COAD	ITGA2	CD8_naive	-0.25055	0.464855	0.604828	3673
COAD	ITGA2	Cytotoxic	0.380097	4.7544e-05	0.00130642	3673
COAD	ITGA2	Exhausted	0.378704	0.00132558	0.011156	3673
COAD	ITGA2	Tr1	0.453126	0.0467514	0.77992	3673
COAD	ITGA2	nTreg	0.0941334	0.603775	0.793514	3673
COAD	ITGA2	iTreg	0.276117	0.00307841	0.136377	3673
COAD	ITGA2	Th1	0.395938	0.00585585	0.0321935	3673
COAD	ITGA2	Th2	0.212883	0.090149	0.638189	3673
COAD	ITGA2	Th17	-0.107183	0.169335	0.541097	3673
COAD	ITGA2	Tfh	0.316986	0.0709768	0.610307	3673
COAD	ITGA2	Central_memory	0.126868	0.509624	0.887397	3673
COAD	ITGA2	Effector_memory	-0.80144	0.104309	0.385318	3673
COAD	ITGA2	NKT	-0.73624	0.00285019	0.0253733	3673
COAD	ITGA2	MAIT	0.139381	0.10964	0.978897	3673
COAD	ITGA2	DC	0.29676	0.0200025	0.122214	3673
COAD	ITGA2	Bcell	-0.0607853	0.688521	0.909143	3673
COAD	ITGA2	Monocyte	-0.100463	0.0723842	0.586711	3673
COAD	ITGA2	Macrophage	0.351435	0.0111102	0.0936493	3673
COAD	ITGA2	NK	0.472219	7.9557e-05	0.00403034	3673
COAD	ITGA2	Neutrophil	-0.371866	0.01502	0.0875378	3673
COAD	ITGA2	Gamma_delta	0.154165	0.465674	0.759802	3673
COAD	ITGA2	CD4_T	0.117239	0.233341	0.692378	3673
COAD	ITGA2	CD8_T	0.246816	0.0235925	0.121293	3673
COAD	ITGA2	InfiltrationScore	0.183048	0.000743338	0.0239245	3673
COAD	LCP1	CD4_naive		0.790183	0.902917	3936
COAD	LCP1	CD8_naive	-0.276957	0.603359	0.721292	3936
COAD	LCP1	Cytotoxic	0.389118	0.00499996	0.0249147	3936
COAD	LCP1	Exhausted	0.408354	0.0217186	0.0615326	3936
COAD	LCP1	Tr1	0.132206	0.628453	0.943491	3936
COAD	LCP1	nTreg	0.236702	0.176241	0.425414	3936
COAD	LCP1	iTreg	0.165791	0.125201	0.424296	3936
COAD	LCP1	Th1	0.331514	0.0321304	0.0870167	3936
COAD	LCP1	Th2	0.126271	0.399322	0.857267	3936
COAD	LCP1	Th17	-0.244196	0.149059	0.511408	3936
COAD	LCP1	Tfh	0.241273	0.31846	0.789349	3936
COAD	LCP1	Central_memory	0.347747	0.557033	0.905758	3936
COAD	LCP1	Effector_memory	-0.593381	0.415345	0.701496	3936
COAD	LCP1	NKT	-1.17725	0.00541536	0.0356412	3936
COAD	LCP1	MAIT	0.170315	0.0745336	0.978897	3936
COAD	LCP1	DC	0.0248299	0.776927	0.855491	3936
COAD	LCP1	Bcell	-0.0224995	0.618743	0.879402	3936
COAD	LCP1	Monocyte	-0.0573761	0.433421	0.843993	3936
COAD	LCP1	Macrophage	0.196588	0.272391	0.440276	3936
COAD	LCP1	NK	0.470286	0.00718801	0.0493341	3936
COAD	LCP1	Neutrophil	-0.361278	0.093707	0.221115	3936
COAD	LCP1	Gamma_delta	0.451645	0.165812	0.540727	3936
COAD	LCP1	CD4_T	0.0409664	0.70855	0.928329	3936
COAD	LCP1	CD8_T	0.27327	0.0520361	0.178237	3936
COAD	LCP1	InfiltrationScore	0.12206	0.0733892	0.213574	3936
COAD	MMP1	CD4_naive		0.775923	0.902917	4312
COAD	MMP1	CD8_naive	0.0619974	0.757933	0.833732	4312
COAD	MMP1	Cytotoxic	0.0674493	0.192949	0.278309	4312
COAD	MMP1	Exhausted	0.300279	0.0609623	0.11822	4312
COAD	MMP1	Tr1	-0.0388735	0.88619	0.993522	4312
COAD	MMP1	nTreg	-0.0172998	0.90372	0.955304	4312
COAD	MMP1	iTreg	0.0182285	0.872454	0.956109	4312
COAD	MMP1	Th1	-0.00998739	0.987718	0.992385	4312
COAD	MMP1	Th2	0.110228	0.436268	0.871096	4312
COAD	MMP1	Th17	-0.0631927	0.641042	0.879072	4312
COAD	MMP1	Tfh	-0.131853	0.870717	0.980032	4312
COAD	MMP1	Central_memory	-0.191494	0.634135	0.947843	4312
COAD	MMP1	Effector_memory	-1.55085	0.011056	0.197541	4312
COAD	MMP1	NKT	-0.121136	0.674415	0.744768	4312
COAD	MMP1	MAIT	0.0203001	0.795242	0.995739	4312
COAD	MMP1	DC	0.282926	0.077036	0.224616	4312
COAD	MMP1	Bcell	0.053884	0.73153	0.923696	4312
COAD	MMP1	Monocyte	-0.0999419	0.267671	0.763228	4312
COAD	MMP1	Macrophage	0.221576	0.188478	0.356378	4312
COAD	MMP1	NK	0.285469	0.0723795	0.172593	4312
COAD	MMP1	Neutrophil	-0.17837	0.38985	0.54064	4312
COAD	MMP1	Gamma_delta	-0.20624	0.484907	0.773444	4312
COAD	MMP1	CD4_T	-0.0247637	0.908953	0.981899	4312
COAD	MMP1	CD8_T	0.172617	0.45462	0.617147	4312
COAD	MMP1	InfiltrationScore	0.122017	0.0763084	0.217903	4312
COAD	MMP10	CD4_naive		0.790562	0.902917	4319
COAD	MMP10	CD8_naive	-0.359306	0.532266	0.66139	4319
COAD	MMP10	Cytotoxic	0.24127	0.0812302	0.147265	4319
COAD	MMP10	Exhausted	0.243738	0.260805	0.340238	4319
COAD	MMP10	Tr1	-0.0659279	0.952651	0.996586	4319
COAD	MMP10	nTreg	0.0719706	0.732633	0.87548	4319
COAD	MMP10	iTreg	0.0219007	0.920634	0.976914	4319
COAD	MMP10	Th1	0.143684	0.498983	0.584145	4319
COAD	MMP10	Th2	0.441857	0.00246997	0.360452	4319
COAD	MMP10	Th17	0.0772805	0.492962	0.802357	4319
COAD	MMP10	Tfh	0.122659	0.529564	0.885129	4319
COAD	MMP10	Central_memory	-0.582027	0.329557	0.806308	4319
COAD	MMP10	Effector_memory	0.0758657	0.501248	0.761831	4319
COAD	MMP10	NKT	-0.477455	0.183187	0.287312	4319
COAD	MMP10	MAIT	0.0417527	0.679766	0.991693	4319
COAD	MMP10	DC	0.198737	0.313353	0.483888	4319
COAD	MMP10	Bcell	-0.0989343	0.623366	0.881843	4319
COAD	MMP10	Monocyte	-0.0892284	0.27934	0.771005	4319
COAD	MMP10	Macrophage	0.229936	0.16092	0.326842	4319
COAD	MMP10	NK	0.404019	0.0133515	0.0690155	4319
COAD	MMP10	Neutrophil	-0.595214	0.00406813	0.0454955	4319
COAD	MMP10	Gamma_delta	0.711452	0.0414471	0.363498	4319
COAD	MMP10	CD4_T	-0.023255	0.784997	0.948488	4319
COAD	MMP10	CD8_T	0.36416	0.0162551	0.103536	4319
COAD	MMP10	InfiltrationScore	0.121684	0.0663422	0.203655	4319
COAD	MMP13	CD4_naive		0.774302	0.902917	4322
COAD	MMP13	CD8_naive	-0.543712	0.211823	0.365475	4322
COAD	MMP13	Cytotoxic	0.33069	0.00892322	0.0357375	4322
COAD	MMP13	Exhausted	0.307301	0.0477963	0.101425	4322
COAD	MMP13	Tr1	0.019443	0.89514	0.993522	4322
COAD	MMP13	nTreg	0.142654	0.302593	0.557863	4322
COAD	MMP13	iTreg	0.111741	0.279182	0.587095	4322
COAD	MMP13	Th1	0.226493	0.134354	0.219804	4322
COAD	MMP13	Th2	0.242749	0.116232	0.661363	4322
COAD	MMP13	Th17	-0.347349	0.0903482	0.422541	4322
COAD	MMP13	Tfh	0.290132	0.207419	0.713568	4322
COAD	MMP13	Central_memory	0.661588	0.133757	0.646875	4322
COAD	MMP13	Effector_memory	0.049217	0.485281	0.749689	4322
COAD	MMP13	NKT	-0.439227	0.125813	0.222342	4322
COAD	MMP13	MAIT	0.119538	0.223117	0.978974	4322
COAD	MMP13	DC	0.389493	0.032555	0.14942	4322
COAD	MMP13	Bcell	0.131375	0.300505	0.718197	4322
COAD	MMP13	Monocyte	0.101105	0.312112	0.790888	4322
COAD	MMP13	Macrophage	0.440286	0.0055097	0.0680325	4322
COAD	MMP13	NK	0.368723	0.0162599	0.076226	4322
COAD	MMP13	Neutrophil	-0.423721	0.0225873	0.106984	4322
COAD	MMP13	Gamma_delta	0.207731	0.452625	0.749931	4322
COAD	MMP13	CD4_T	0.00375219	0.669983	0.914323	4322
COAD	MMP13	CD8_T	0.2592	0.0371594	0.150364	4322
COAD	MMP13	InfiltrationScore	0.219574	0.00144174	0.0336715	4322
COAD	MMP14	CD4_naive		0.847605	0.902917	4323
COAD	MMP14	CD8_naive	-1.25643	0.090956	0.214309	4323
COAD	MMP14	Cytotoxic	-0.00385261	0.952714	0.963922	4323
COAD	MMP14	Exhausted	-0.121712	0.488376	0.561734	4323
COAD	MMP14	Tr1	-0.0260591	0.952657	0.996586	4323
COAD	MMP14	nTreg	0.0612218	0.925398	0.965837	4323
COAD	MMP14	iTreg	0.0628413	0.895708	0.96691	4323
COAD	MMP14	Th1	-0.0262866	0.750224	0.803462	4323
COAD	MMP14	Th2	-0.168947	0.395925	0.855404	4323
COAD	MMP14	Th17	0.170489	0.426096	0.764281	4323
COAD	MMP14	Tfh	0.0132669	0.917965	0.98631	4323
COAD	MMP14	Central_memory	0.590639	0.773934	0.970446	4323
COAD	MMP14	Effector_memory	0.271294	0.66995	0.858431	4323
COAD	MMP14	NKT	-0.0770187	0.95022	0.96364	4323
COAD	MMP14	MAIT	0.108135	0.352324	0.978974	4323
COAD	MMP14	DC	0.0775123	0.793192	0.868063	4323
COAD	MMP14	Bcell	0.369809	0.156473	0.591071	4323
COAD	MMP14	Monocyte	-0.129539	0.377075	0.81968	4323
COAD	MMP14	Macrophage	0.100658	0.908067	0.944035	4323
COAD	MMP14	NK	-0.212307	0.705695	0.793077	4323
COAD	MMP14	Neutrophil	-0.138052	0.526357	0.661536	4323
COAD	MMP14	Gamma_delta	-0.483139	0.409132	0.721979	4323
COAD	MMP14	CD4_T	0.0676575	0.920444	0.984089	4323
COAD	MMP14	CD8_T	0.0411396	0.922922	0.957125	4323
COAD	MMP14	InfiltrationScore	0.00983262	0.903122	0.946065	4323
COAD	MMP2	CD4_naive		0.7599	0.902917	4313
COAD	MMP2	CD8_naive	-0.729728	0.10285	0.231747	4313
COAD	MMP2	Cytotoxic	0.41854	0.000963529	0.00874124	4313
COAD	MMP2	Exhausted	0.498097	0.00137279	0.0113752	4313
COAD	MMP2	Tr1	0.0951371	0.85487	0.989552	4313
COAD	MMP2	nTreg	0.370812	0.027016	0.182215	4313
COAD	MMP2	iTreg	0.138023	0.169651	0.48108	4313
COAD	MMP2	Th1	0.45117	0.00217093	0.0181432	4313
COAD	MMP2	Th2	0.036696	0.78164	0.967054	4313
COAD	MMP2	Th17	-0.24919	0.157579	0.522654	4313
COAD	MMP2	Tfh	0.158457	0.500259	0.873949	4313
COAD	MMP2	Central_memory	0.0267215	0.914404	0.986819	4313
COAD	MMP2	Effector_memory	0.547875	0.563242	0.798193	4313
COAD	MMP2	NKT	-0.979084	0.00341605	0.0276903	4313
COAD	MMP2	MAIT	0.0472364	0.60252	0.991693	4313
COAD	MMP2	DC	0.321844	0.0291265	0.143853	4313
COAD	MMP2	Bcell	-0.0695516	0.767155	0.936628	4313
COAD	MMP2	Monocyte	-0.106303	0.249821	0.75086	4313
COAD	MMP2	Macrophage	0.320017	0.0206665	0.12213	4313
COAD	MMP2	NK	0.36004	0.0179552	0.0801326	4313
COAD	MMP2	Neutrophil	-0.613121	0.000956139	0.0213208	4313
COAD	MMP2	Gamma_delta	0.647665	0.023459	0.328837	4313
COAD	MMP2	CD4_T	-0.140468	0.466207	0.843096	4313
COAD	MMP2	CD8_T	0.3562	0.00499166	0.0598298	4313
COAD	MMP2	InfiltrationScore	0.137132	0.0224582	0.119497	4313
COAD	MMP3	CD4_naive		0.759465	0.902917	4314
COAD	MMP3	CD8_naive	-2.44013	0.000251817	0.0108595	4314
COAD	MMP3	Cytotoxic	0.422748	0.00319411	0.0188246	4314
COAD	MMP3	Exhausted	0.635053	4.8349e-05	0.0013783	4314
COAD	MMP3	Tr1	0.0249282	0.851035	0.989552	4314
COAD	MMP3	nTreg	0.157534	0.270332	0.528818	4314
COAD	MMP3	iTreg	0.110279	0.365921	0.663451	4314
COAD	MMP3	Th1	0.60492	0.000157594	0.00388825	4314
COAD	MMP3	Th2	0.218591	0.155469	0.704558	4314
COAD	MMP3	Th17	-0.449173	0.0277828	0.285194	4314
COAD	MMP3	Tfh	0.234159	0.216024	0.717714	4314
COAD	MMP3	Central_memory	0.889778	0.104041	0.646875	4314
COAD	MMP3	Effector_memory	1.06224	0.0101279	0.189339	4314
COAD	MMP3	NKT	-1.43101	0.000810162	0.0127276	4314
COAD	MMP3	MAIT	-0.0433517	0.693494	0.991738	4314
COAD	MMP3	DC	0.440634	0.00197564	0.0453623	4314
COAD	MMP3	Bcell	-0.231017	0.851205	0.965958	4314
COAD	MMP3	Monocyte	0.0139725	0.996637	1	4314
COAD	MMP3	Macrophage	0.457103	0.00149317	0.0374472	4314
COAD	MMP3	NK	0.492918	0.000740452	0.0147153	4314
COAD	MMP3	Neutrophil	-0.492684	0.00378217	0.0437175	4314
COAD	MMP3	Gamma_delta	0.387945	0.141128	0.511861	4314
COAD	MMP3	CD4_T	-0.0341343	0.952943	0.991636	4314
COAD	MMP3	CD8_T	0.320497	0.00781976	0.0730651	4314
COAD	MMP3	InfiltrationScore	0.222174	0.0026166	0.0428767	4314
COAD	MMP9	CD4_naive		0.733212	0.902917	4318
COAD	MMP9	CD8_naive	-1.19343	0.00491872	0.0500854	4318
COAD	MMP9	Cytotoxic	0.435074	0.00021537	0.00345114	4318
COAD	MMP9	Exhausted	0.396039	0.00400326	0.0220135	4318
COAD	MMP9	Tr1	0.282069	0.308934	0.885918	4318
COAD	MMP9	nTreg	0.109057	0.76262	0.889197	4318
COAD	MMP9	iTreg	0.0908995	0.273891	0.581523	4318
COAD	MMP9	Th1	0.508927	0.000332956	0.00615764	4318
COAD	MMP9	Th2	0.243596	0.0744777	0.61505	4318
COAD	MMP9	Th17	-0.315337	0.0763399	0.401246	4318
COAD	MMP9	Tfh	0.579567	0.000393103	0.490728	4318
COAD	MMP9	Central_memory	0.821532	0.0656776	0.614723	4318
COAD	MMP9	Effector_memory	0.510597	0.0946185	0.369612	4318
COAD	MMP9	NKT	-1.16085	0.00104145	0.0146796	4318
COAD	MMP9	MAIT	0.0989276	0.554673	0.988541	4318
COAD	MMP9	DC	0.169425	0.210642	0.381875	4318
COAD	MMP9	Bcell	0.082726	0.885205	0.97493	4318
COAD	MMP9	Monocyte	-0.234206	0.038042	0.543835	4318
COAD	MMP9	Macrophage	0.14287	0.170234	0.336687	4318
COAD	MMP9	NK	0.393079	0.00137996	0.0205828	4318
COAD	MMP9	Neutrophil	-0.488696	0.00110066	0.0227654	4318
COAD	MMP9	Gamma_delta	0.616327	0.0341811	0.350397	4318
COAD	MMP9	CD4_T	0.0615177	0.68437	0.91952	4318
COAD	MMP9	CD8_T	0.469188	8.55881e-06	0.00180959	4318
COAD	MMP9	InfiltrationScore	0.12635	0.0444641	0.165472	4318
COAD	SERPINE1	CD4_naive		0.790183	0.902917	5054
COAD	SERPINE1	CD8_naive	-1.27386	0.0210485	0.101968	5054
COAD	SERPINE1	Cytotoxic	0.320545	0.0383258	0.0892517	5054
COAD	SERPINE1	Exhausted	0.434399	0.00938671	0.0369904	5054
COAD	SERPINE1	Tr1	-0.445744	0.245684	0.878418	5054
COAD	SERPINE1	nTreg	0.585074	0.00510918	0.0934958	5054
COAD	SERPINE1	iTreg	0.15216	0.187162	0.495591	5054
COAD	SERPINE1	Th1	0.521543	0.00453969	0.0278211	5054
COAD	SERPINE1	Th2	0.0255673	0.920347	0.990696	5054
COAD	SERPINE1	Th17	-0.294482	0.232922	0.618929	5054
COAD	SERPINE1	Tfh	0.171039	0.569321	0.896958	5054
COAD	SERPINE1	Central_memory	0.357751	0.235248	0.744287	5054
COAD	SERPINE1	Effector_memory	0.966642	0.0346462	0.273303	5054
COAD	SERPINE1	NKT	-0.730965	0.0424814	0.111949	5054
COAD	SERPINE1	MAIT	-0.0308203	0.744281	0.994903	5054
COAD	SERPINE1	DC	0.362974	0.0626231	0.203135	5054
COAD	SERPINE1	Bcell	-0.343866	0.108536	0.534358	5054
COAD	SERPINE1	Monocyte	-0.207618	0.0392125	0.543835	5054
COAD	SERPINE1	Macrophage	0.212404	0.205294	0.375579	5054
COAD	SERPINE1	NK	0.188652	0.238584	0.36828	5054
COAD	SERPINE1	Neutrophil	-0.305634	0.0821997	0.20762	5054
COAD	SERPINE1	Gamma_delta	0.260094	0.461054	0.756114	5054
COAD	SERPINE1	CD4_T	-0.532548	0.0643174	0.4815	5054
COAD	SERPINE1	CD8_T	0.246665	0.0425042	0.161	5054
COAD	SERPINE1	InfiltrationScore	0.04694	0.482459	0.644196	5054
COAD	SPP1	CD4_naive		0.826208	0.902917	6696
COAD	SPP1	CD8_naive	-0.769687	0.218454	0.370533	6696
COAD	SPP1	Cytotoxic	0.210077	0.196669	0.28239	6696
COAD	SPP1	Exhausted	0.167086	0.563119	0.629257	6696
COAD	SPP1	Tr1	-0.377109	0.373024	0.895519	6696
COAD	SPP1	nTreg	0.0406762	0.822327	0.922633	6696
COAD	SPP1	iTreg	0.0413274	0.986564	0.997961	6696
COAD	SPP1	Th1	0.0321732	0.932895	0.950625	6696
COAD	SPP1	Th2	0.183366	0.43193	0.869286	6696
COAD	SPP1	Th17	0.265957	0.0510849	0.347017	6696
COAD	SPP1	Tfh	0.108214	0.72991	0.942873	6696
COAD	SPP1	Central_memory	-3.65615	0.0699826	0.614723	6696
COAD	SPP1	Effector_memory	0.735954	0.481096	0.745949	6696
COAD	SPP1	NKT	-0.057217	0.702633	0.768624	6696
COAD	SPP1	MAIT	-0.171706	0.288698	0.978974	6696
COAD	SPP1	DC	0.336086	0.0813327	0.231016	6696
COAD	SPP1	Bcell	-0.391112	0.130297	0.560312	6696
COAD	SPP1	Monocyte	0.0602724	0.751107	0.954075	6696
COAD	SPP1	Macrophage	0.422778	0.0173079	0.11346	6696
COAD	SPP1	NK	0.312502	0.112782	0.22358	6696
COAD	SPP1	Neutrophil	-0.568686	0.0104735	0.07245	6696
COAD	SPP1	Gamma_delta	0.969663	0.0147748	0.307098	6696
COAD	SPP1	CD4_T	0.0125374	0.982085	0.99746	6696
COAD	SPP1	CD8_T	0.145552	0.287427	0.466864	6696
COAD	SPP1	InfiltrationScore	0.140015	0.0655902	0.202449	6696
COAD	TNFRSF11B	CD4_naive		0.901681	0.902917	4982
COAD	TNFRSF11B	CD8_naive	-1.37843	0.180515	0.329612	4982
COAD	TNFRSF11B	Cytotoxic	0.201956	0.415044	0.502762	4982
COAD	TNFRSF11B	Exhausted	0.441387	0.143785	0.217622	4982
COAD	TNFRSF11B	Tr1	-1.78628	0.114361	0.79347	4982
COAD	TNFRSF11B	nTreg	-0.255141	0.46482	0.696384	4982
COAD	TNFRSF11B	iTreg	-0.135267	0.340902	0.641524	4982
COAD	TNFRSF11B	Th1	0.276584	0.287731	0.382277	4982
COAD	TNFRSF11B	Th2	0.325919	0.345417	0.831944	4982
COAD	TNFRSF11B	Th17	-0.36505	0.161567	0.527006	4982
COAD	TNFRSF11B	Tfh	0.259583	0.506387	0.876887	4982
COAD	TNFRSF11B	Central_memory	0.042526	0.988913	0.998293	4982
COAD	TNFRSF11B	Effector_memory	0.41091	0.419798	0.704322	4982
COAD	TNFRSF11B	NKT	-0.150867	0.66739	0.738456	4982
COAD	TNFRSF11B	MAIT	0.259622	0.14379	0.978897	4982
COAD	TNFRSF11B	DC	-0.339587	0.366179	0.5333	4982
COAD	TNFRSF11B	Bcell	-0.603482	0.160235	0.593601	4982
COAD	TNFRSF11B	Monocyte	-0.0815351	0.558719	0.895115	4982
COAD	TNFRSF11B	Macrophage	-0.224859	0.46485	0.61846	4982
COAD	TNFRSF11B	NK	0.35739	0.281747	0.413521	4982
COAD	TNFRSF11B	Neutrophil	-0.159465	0.549833	0.681891	4982
COAD	TNFRSF11B	Gamma_delta	0.599765	0.280869	0.634446	4982
COAD	TNFRSF11B	CD4_T	0.0386087	0.932925	0.987329	4982
COAD	TNFRSF11B	CD8_T	0.229033	0.349956	0.523323	4982
COAD	TNFRSF11B	InfiltrationScore	-0.0386256	0.739723	0.836925	4982
DLBC	MMP2	CD4_naive		0.352981	0.579818	4313
DLBC	MMP2	CD8_naive	-2.04414	0.0438065	0.648781	4313
DLBC	MMP2	Cytotoxic	-0.582164	0.634888	0.930893	4313
DLBC	MMP2	Exhausted	0.61595	0.421844	0.561907	4313
DLBC	MMP2	Tr1	-0.124494	0.787979	1	4313
DLBC	MMP2	nTreg	-0.499441	0.63802	0.994424	4313
DLBC	MMP2	iTreg	-1.52996	0.297411	0.755313	4313
DLBC	MMP2	Th1	0.239997	0.567853	0.918666	4313
DLBC	MMP2	Th2	1.88192	0.0334535	0.608746	4313
DLBC	MMP2	Th17	-0.0136811	0.973205	1	4313
DLBC	MMP2	Tfh	-1.08207	0.21389	0.692989	4313
DLBC	MMP2	Central_memory	-1.497	0.0930838	0.651445	4313
DLBC	MMP2	Effector_memory	-0.63996	0.59247	0.676965	4313
DLBC	MMP2	NKT	1.38367	0.074091	0.631181	4313
DLBC	MMP2	MAIT	-1.54187	0.148551	0.777292	4313
DLBC	MMP2	DC	0.652378	0.0646741	0.504906	4313
DLBC	MMP2	Bcell	0.38295	0.201821	0.888793	4313
DLBC	MMP2	Monocyte	-0.123524	0.567945	0.941446	4313
DLBC	MMP2	Macrophage	0.243397	0.364487	0.915296	4313
DLBC	MMP2	NK	0.46257	0.0404572	0.58618	4313
DLBC	MMP2	Neutrophil	0.0657675	0.973202	1	4313
DLBC	MMP2	Gamma_delta	-0.202296	0.762341	0.984001	4313
DLBC	MMP2	CD4_T	-0.56629	0.114409	0.719196	4313
DLBC	MMP2	CD8_T	-0.146617	0.459613	0.88377	4313
DLBC	MMP2	InfiltrationScore	0.203963	0.0343571	0.639563	4313
ESCA	ITGA2	CD4_naive		0.910979	0.958813	3673
ESCA	ITGA2	CD8_naive	0.638329	0.0756258	1	3673
ESCA	ITGA2	Cytotoxic	0.0745804	0.969713	1	3673
ESCA	ITGA2	Exhausted	-3.8101	0.34621	0.707817	3673
ESCA	ITGA2	Tr1	0.121776	0.540362	0.931751	3673
ESCA	ITGA2	nTreg	0.310358	0.23541	0.664022	3673
ESCA	ITGA2	iTreg	0.299018	0.105576	0.970203	3673
ESCA	ITGA2	Th1	-0.0749775	1	1	3673
ESCA	ITGA2	Th2	0.29974	0.419698	0.917221	3673
ESCA	ITGA2	Th17	0.26396	0.453321	0.908158	3673
ESCA	ITGA2	Tfh	0.132023	0.743281	0.982323	3673
ESCA	ITGA2	Central_memory	0.461442	0.518074	0.910881	3673
ESCA	ITGA2	Effector_memory	0.177486	0.423688	0.876884	3673
ESCA	ITGA2	NKT	-1.21626	0.096604	0.621342	3673
ESCA	ITGA2	MAIT	0.252938	0.0892956	0.716872	3673
ESCA	ITGA2	DC	-0.421554	0.0551855	0.835027	3673
ESCA	ITGA2	Bcell	0.241836	0.347348	0.890064	3673
ESCA	ITGA2	Monocyte	-0.210263	0.233546	0.780452	3673
ESCA	ITGA2	Macrophage	-0.42206	0.134924	0.914855	3673
ESCA	ITGA2	NK	-0.412762	0.222572	0.853534	3673
ESCA	ITGA2	Neutrophil	-0.0698933	0.645252	0.970974	3673
ESCA	ITGA2	Gamma_delta	0.0430788	0.628302	0.9546	3673
ESCA	ITGA2	CD4_T	0.261968	0.444792	0.868046	3673
ESCA	ITGA2	CD8_T	0.182812	0.294236	0.794569	3673
ESCA	ITGA2	InfiltrationScore	-0.129346	0.165802	0.904524	3673
ESCA	MMP13	CD4_naive		0.958313	0.958813	4322
ESCA	MMP13	CD8_naive	1.35916	0.0189966	1	4322
ESCA	MMP13	Cytotoxic	-0.162792	0.377265	0.979806	4322
ESCA	MMP13	Exhausted		0.270395	0.605691	4322
ESCA	MMP13	Tr1	0.101439	0.775275	0.966306	4322
ESCA	MMP13	nTreg	-0.147718	0.581613	0.860602	4322
ESCA	MMP13	iTreg	0.147223	0.685503	0.970203	4322
ESCA	MMP13	Th1	-1.61327	0.0879653	0.710843	4322
ESCA	MMP13	Th2	0.276935	0.60917	0.932454	4322
ESCA	MMP13	Th17	0.504064	0.0831393	0.820021	4322
ESCA	MMP13	Tfh	-0.630784	0.377211	0.890885	4322
ESCA	MMP13	Central_memory		0.109922	0.56228	4322
ESCA	MMP13	Effector_memory		0.229898	0.662449	4322
ESCA	MMP13	NKT	-0.729337	0.303353	0.768372	4322
ESCA	MMP13	MAIT	-0.773319	0.0289473	0.694487	4322
ESCA	MMP13	DC	-0.683487	0.0550336	0.835027	4322
ESCA	MMP13	Bcell	-1.06916	0.0517485	0.711429	4322
ESCA	MMP13	Monocyte	-0.00610057	0.910141	0.988057	4322
ESCA	MMP13	Macrophage	-0.54885	0.165301	0.914855	4322
ESCA	MMP13	NK	-0.015561	0.952356	0.992326	4322
ESCA	MMP13	Neutrophil	0.169326	0.528247	0.956918	4322
ESCA	MMP13	Gamma_delta	0.131031	0.53695	0.9546	4322
ESCA	MMP13	CD4_T	-0.698668	0.128435	0.723323	4322
ESCA	MMP13	CD8_T	-0.115908	0.545758	0.894997	4322
ESCA	MMP13	InfiltrationScore	-0.273743	0.0353395	0.904524	4322
ESCA	MMP14	CD4_naive		0.958199	0.958813	4323
ESCA	MMP14	CD8_naive	0.366112	0.579217	1	4323
ESCA	MMP14	Cytotoxic	0.127224	0.872726	0.993501	4323
ESCA	MMP14	Exhausted		0.268505	0.605691	4323
ESCA	MMP14	Tr1	0.191631	0.703583	0.962988	4323
ESCA	MMP14	nTreg	-0.399782	0.17754	0.613413	4323
ESCA	MMP14	iTreg	0.155432	0.579565	0.970203	4323
ESCA	MMP14	Th1	-0.560951	0.626053	0.925302	4323
ESCA	MMP14	Th2	0.619396	0.101923	0.835445	4323
ESCA	MMP14	Th17	0.0256385	0.973375	1	4323
ESCA	MMP14	Tfh	0.792136	0.0780064	0.790177	4323
ESCA	MMP14	Central_memory	1.64581	0.0277556	0.56228	4323
ESCA	MMP14	Effector_memory	-1.48884	0.815135	0.982419	4323
ESCA	MMP14	NKT	-0.0339087	0.936142	0.991229	4323
ESCA	MMP14	MAIT	0.107885	0.748661	0.976313	4323
ESCA	MMP14	DC	0.0887619	0.654714	0.959897	4323
ESCA	MMP14	Bcell	0.217611	0.434807	0.915023	4323
ESCA	MMP14	Monocyte	-0.198305	0.500198	0.915147	4323
ESCA	MMP14	Macrophage	-0.120694	0.784342	0.990764	4323
ESCA	MMP14	NK	0.24159	0.466883	0.918344	4323
ESCA	MMP14	Neutrophil	-0.718142	0.126372	0.933326	4323
ESCA	MMP14	Gamma_delta	0.0305556	0.851734	0.981702	4323
ESCA	MMP14	CD4_T	0.584578	0.0758049	0.692841	4323
ESCA	MMP14	CD8_T	0.0835718	0.794615	0.97285	4323
ESCA	MMP14	InfiltrationScore	0.0401353	0.763898	0.968701	4323
ESCA	MMP2	CD4_naive		0.911225	0.958813	4313
ESCA	MMP2	CD8_naive	-0.758528	0.266891	1	4313
ESCA	MMP2	Cytotoxic	0.603	0.00429451	0.979806	4313
ESCA	MMP2	Exhausted	2.24123	0.000649973	0.602636	4313
ESCA	MMP2	Tr1	-0.0963876	0.281816	0.849933	4313
ESCA	MMP2	nTreg	-0.0171732	0.984936	0.999256	4313
ESCA	MMP2	iTreg	0.0442932	0.939799	0.995258	4313
ESCA	MMP2	Th1	1.11809	0.00139502	0.710843	4313
ESCA	MMP2	Th2	0.1594	0.751777	0.970406	4313
ESCA	MMP2	Th17	-0.159046	0.587245	0.932455	4313
ESCA	MMP2	Tfh	0.413223	0.217914	0.814834	4313
ESCA	MMP2	Central_memory	0.109428	0.489656	0.902963	4313
ESCA	MMP2	Effector_memory	-0.238603	0.876657	0.984284	4313
ESCA	MMP2	NKT	-0.0953412	0.835432	0.969489	4313
ESCA	MMP2	MAIT	0.0277201	0.921038	0.993491	4313
ESCA	MMP2	DC	0.0130097	0.842851	0.986539	4313
ESCA	MMP2	Bcell	-0.333388	0.458638	0.923128	4313
ESCA	MMP2	Monocyte	-0.180337	0.38253	0.870175	4313
ESCA	MMP2	Macrophage	0.0309799	0.981171	1	4313
ESCA	MMP2	NK	0.512504	0.0243533	0.801928	4313
ESCA	MMP2	Neutrophil	-0.233528	0.288215	0.933326	4313
ESCA	MMP2	Gamma_delta	0.462336	0.0529466	0.898414	4313
ESCA	MMP2	CD4_T	-0.0877759	0.667528	0.948628	4313
ESCA	MMP2	CD8_T	0.288108	0.0743873	0.675743	4313
ESCA	MMP2	InfiltrationScore	0.0702534	0.37234	0.906061	4313
ESCA	MMP9	CD4_naive		0.931603	0.958813	4318
ESCA	MMP9	CD8_naive	-0.113035	0.991271	1	4318
ESCA	MMP9	Cytotoxic	0.0820958	0.986919	1	4318
ESCA	MMP9	Exhausted	-1.92364	0.596102	0.882603	4318
ESCA	MMP9	Tr1	0.207277	0.370085	0.88576	4318
ESCA	MMP9	nTreg	0.644826	0.00803404	0.390749	4318
ESCA	MMP9	iTreg	-0.069037	0.730619	0.970203	4318
ESCA	MMP9	Th1	0.000373466	0.839747	0.978818	4318
ESCA	MMP9	Th2	-0.179996	0.554978	0.926118	4318
ESCA	MMP9	Th17	0.0845985	0.87407	0.992308	4318
ESCA	MMP9	Tfh	0.272175	0.487593	0.931194	4318
ESCA	MMP9	Central_memory	1.08999	0.272741	0.779412	4318
ESCA	MMP9	Effector_memory	-1.71755	0.526011	0.934855	4318
ESCA	MMP9	NKT	0.783239	0.0564154	0.559774	4318
ESCA	MMP9	MAIT	0.106204	0.57349	0.935727	4318
ESCA	MMP9	DC	-0.396684	0.103396	0.835027	4318
ESCA	MMP9	Bcell	0.404048	0.218815	0.849708	4318
ESCA	MMP9	Monocyte	-0.138387	0.494514	0.913818	4318
ESCA	MMP9	Macrophage	-0.433334	0.227142	0.91604	4318
ESCA	MMP9	NK	-0.272749	0.406152	0.912485	4318
ESCA	MMP9	Neutrophil	-0.0571228	0.982559	0.999999	4318
ESCA	MMP9	Gamma_delta	0.0654448	0.767896	0.971139	4318
ESCA	MMP9	CD4_T	0.15107	0.654048	0.946282	4318
ESCA	MMP9	CD8_T	0.398746	0.037826	0.675743	4318
ESCA	MMP9	InfiltrationScore	-0.060097	0.497988	0.935908	4318
GBM	ITGA2	CD4_naive		0.870188	0.9059	3673
GBM	ITGA2	CD8_naive	0.508539	0.272281	0.720854	3673
GBM	ITGA2	Cytotoxic	0.217471	0.37513	0.751211	3673
GBM	ITGA2	Exhausted	-2.63608	0.145596	0.291713	3673
GBM	ITGA2	Tr1	-1.46931	0.0626118	0.132455	3673
GBM	ITGA2	nTreg	-2.05859	0.0329416	0.105802	3673
GBM	ITGA2	iTreg	-0.820325	0.127853	0.394081	3673
GBM	ITGA2	Th1	0.500733	0.0662544	0.150123	3673
GBM	ITGA2	Th2	0.407304	0.229596	0.499055	3673
GBM	ITGA2	Th17	-0.203321	0.830639	0.948925	3673
GBM	ITGA2	Tfh	-0.374907	0.715083	0.960014	3673
GBM	ITGA2	Central_memory		0.126472	0.389076	3673
GBM	ITGA2	Effector_memory	0.827771	0.119063	0.229514	3673
GBM	ITGA2	NKT	-2.3711	0.0801352	0.178365	3673
GBM	ITGA2	MAIT	0.170593	0.442844	0.90581	3673
GBM	ITGA2	DC	-0.106203	0.682633	0.897706	3673
GBM	ITGA2	Bcell	0.338021	0.217578	0.934761	3673
GBM	ITGA2	Monocyte	-0.346735	0.0314472	0.172951	3673
GBM	ITGA2	Macrophage	-0.955003	0.0740385	0.14793	3673
GBM	ITGA2	NK	-0.146057	0.52114	0.983135	3673
GBM	ITGA2	Neutrophil	-0.467158	0.16067	0.365014	3673
GBM	ITGA2	Gamma_delta	0.575151	0.307615	0.990463	3673
GBM	ITGA2	CD4_T	-0.388125	0.262834	0.456358	3673
GBM	ITGA2	CD8_T	0.452862	0.029993	0.142661	3673
GBM	ITGA2	InfiltrationScore	-0.219392	0.0882703	0.183423	3673
GBM	LCP1	CD4_naive		0.870598	0.9059	3936
GBM	LCP1	CD8_naive	0.464455	0.321885	0.720854	3936
GBM	LCP1	Cytotoxic	0.214206	0.3918	0.751211	3936
GBM	LCP1	Exhausted		0.0351041	0.198463	3936
GBM	LCP1	Tr1		0.00395467	0.0354773	3936
GBM	LCP1	nTreg	-3.56907	0.0150132	0.095493	3936
GBM	LCP1	iTreg	-0.816361	0.130253	0.394081	3936
GBM	LCP1	Th1	0.604641	0.0166634	0.12753	3936
GBM	LCP1	Th2	0.43427	0.155921	0.499055	3936
GBM	LCP1	Th17	0.0926649	0.527788	0.873533	3936
GBM	LCP1	Tfh	-0.621948	0.479727	0.910968	3936
GBM	LCP1	Central_memory		0.128303	0.389076	3936
GBM	LCP1	Effector_memory	1.1903	0.0128883	0.103795	3936
GBM	LCP1	NKT		0.0236399	0.156141	3936
GBM	LCP1	MAIT	0.162185	0.479973	0.90581	3936
GBM	LCP1	DC	-0.38305	0.116646	0.446673	3936
GBM	LCP1	Bcell	0.132695	0.590835	0.934761	3936
GBM	LCP1	Monocyte	-0.338462	0.0346077	0.172951	3936
GBM	LCP1	Macrophage	-2.1227	0.00445386	0.0393839	3936
GBM	LCP1	NK	0.019105	0.885684	0.983135	3936
GBM	LCP1	Neutrophil	-0.592056	0.0890611	0.365014	3936
GBM	LCP1	Gamma_delta	0.130708	0.870743	0.990463	3936
GBM	LCP1	CD4_T	-0.818675	0.0346076	0.214403	3936
GBM	LCP1	CD8_T	0.495199	0.0203871	0.142661	3936
GBM	LCP1	InfiltrationScore	-0.348209	0.010958	0.088892	3936
GBM	MMP10	CD4_naive		0.869773	0.9059	4319
GBM	MMP10	CD8_naive	-0.114043	0.994934	0.999099	4319
GBM	MMP10	Cytotoxic	-0.11477	0.599317	0.822774	4319
GBM	MMP10	Exhausted	-2.7832	0.229991	0.412562	4319
GBM	MMP10	Tr1	-0.847678	0.120932	0.217704	4319
GBM	MMP10	nTreg	-0.194943	0.894227	0.933324	4319
GBM	MMP10	iTreg	0.0738366	0.814773	0.90357	4319
GBM	MMP10	Th1	0.415796	0.141961	0.267744	4319
GBM	MMP10	Th2	0.381057	0.279073	0.530511	4319
GBM	MMP10	Th17	-0.282009	0.766061	0.927783	4319
GBM	MMP10	Tfh	0.353058	0.392526	0.910968	4319
GBM	MMP10	Central_memory	-2.17826	0.438544	0.679526	4319
GBM	MMP10	Effector_memory	0.83291	0.103907	0.207855	4319
GBM	MMP10	NKT	-0.47601	0.623375	0.739332	4319
GBM	MMP10	MAIT	0.253364	0.148954	0.90581	4319
GBM	MMP10	DC	-0.397451	0.159933	0.446673	4319
GBM	MMP10	Bcell	-0.283757	0.39627	0.934761	4319
GBM	MMP10	Monocyte	-0.18884	0.368699	0.503563	4319
GBM	MMP10	Macrophage	-0.660537	0.205522	0.326566	4319
GBM	MMP10	NK	0.000376216	0.934417	0.989867	4319
GBM	MMP10	Neutrophil	-0.368721	0.224192	0.442677	4319
GBM	MMP10	Gamma_delta	0.327925	0.603274	0.990463	4319
GBM	MMP10	CD4_T	-0.0227025	0.904264	0.948947	4319
GBM	MMP10	CD8_T	0.0224306	0.451273	0.584184	4319
GBM	MMP10	InfiltrationScore	-0.223896	0.0461634	0.113593	4319
GBM	MMP13	CD4_naive		0.904411	0.9059	4322
GBM	MMP13	CD8_naive	1.51217	0.0222071	0.720854	4322
GBM	MMP13	Cytotoxic	-0.204685	0.382531	0.751211	4322
GBM	MMP13	Exhausted		0.0832872	0.198463	4322
GBM	MMP13	Tr1	-0.379789	0.326367	0.45799	4322
GBM	MMP13	nTreg	-0.454134	0.491501	0.605452	4322
GBM	MMP13	iTreg	-1.78027	0.0965241	0.394081	4322
GBM	MMP13	Th1	0.123604	0.798711	0.873639	4322
GBM	MMP13	Th2	-0.264677	0.757239	0.880839	4322
GBM	MMP13	Th17	0.511899	0.207764	0.873533	4322
GBM	MMP13	Tfh	-0.513177	0.642689	0.942149	4322
GBM	MMP13	Central_memory	-0.0363394	0.920002	0.965628	4322
GBM	MMP13	Effector_memory	-0.144952	0.864001	0.938735	4322
GBM	MMP13	NKT	-1.01186	0.601907	0.727052	4322
GBM	MMP13	MAIT	-0.175747	0.249545	0.90581	4322
GBM	MMP13	DC	-0.828927	0.0876525	0.446673	4322
GBM	MMP13	Bcell	-0.409699	0.462813	0.934761	4322
GBM	MMP13	Monocyte	0.112365	0.496444	0.629079	4322
GBM	MMP13	Macrophage	-0.573458	0.129864	0.226969	4322
GBM	MMP13	NK	-0.508942	0.0834473	0.983135	4322
GBM	MMP13	Neutrophil	0.343358	0.37829	0.594338	4322
GBM	MMP13	Gamma_delta	0.651127	0.166054	0.990463	4322
GBM	MMP13	CD4_T	-2.85904	0.0191965	0.214403	4322
GBM	MMP13	CD8_T	0.201003	0.665177	0.763385	4322
GBM	MMP13	InfiltrationScore	-0.343347	0.0398242	0.101681	4322
GBM	MMP14	CD4_naive		0.870188	0.9059	4323
GBM	MMP14	CD8_naive	0.31214	0.456573	0.742412	4323
GBM	MMP14	Cytotoxic	0.235285	0.329577	0.751211	4323
GBM	MMP14	Exhausted	-1.13323	0.258583	0.440177	4323
GBM	MMP14	Tr1	-1.0421	0.23449	0.366013	4323
GBM	MMP14	nTreg	-3.11091	0.0151618	0.095493	4323
GBM	MMP14	iTreg	-1.04495	0.0917548	0.394081	4323
GBM	MMP14	Th1	0.515541	0.0511857	0.128922	4323
GBM	MMP14	Th2	0.430008	0.188637	0.499055	4323
GBM	MMP14	Th17	-0.323854	0.678009	0.886569	4323
GBM	MMP14	Tfh	-0.204154	0.919789	0.973056	4323
GBM	MMP14	Central_memory	0.0224918	0.832507	0.92275	4323
GBM	MMP14	Effector_memory	0.899968	0.0814262	0.174011	4323
GBM	MMP14	NKT	-1.20404	0.238286	0.391215	4323
GBM	MMP14	MAIT	0.12617	0.753135	0.969196	4323
GBM	MMP14	DC	-0.0772853	0.7627	0.91454	4323
GBM	MMP14	Bcell	0.0864052	0.777111	0.964951	4323
GBM	MMP14	Monocyte	-0.334056	0.0356372	0.172951	4323
GBM	MMP14	Macrophage	-1.03898	0.0519405	0.113651	4323
GBM	MMP14	NK	-0.0208983	0.909855	0.983135	4323
GBM	MMP14	Neutrophil	-0.357456	0.279254	0.499149	4323
GBM	MMP14	Gamma_delta	0.0168445	0.969858	0.995022	4323
GBM	MMP14	CD4_T	-0.359971	0.302236	0.490768	4323
GBM	MMP14	CD8_T	0.368648	0.101944	0.200818	4323
GBM	MMP14	InfiltrationScore	-0.218552	0.0968012	0.194723	4323
GBM	MMP3	CD4_naive		0.904411	0.9059	4314
GBM	MMP3	CD8_naive	0.480136	0.480548	0.76093	4314
GBM	MMP3	Cytotoxic	0.0903094	0.877171	0.954111	4314
GBM	MMP3	Exhausted	-0.290573	0.968744	0.984694	4314
GBM	MMP3	Tr1	0.20804	0.648424	0.764161	4314
GBM	MMP3	nTreg	0.330056	0.687734	0.778278	4314
GBM	MMP3	iTreg	0.166704	0.846764	0.921398	4314
GBM	MMP3	Th1	-0.090842	0.763124	0.847037	4314
GBM	MMP3	Th2	0.00638201	0.913847	0.964758	4314
GBM	MMP3	Th17	0.128239	0.577904	0.873533	4314
GBM	MMP3	Tfh	-0.311959	0.834624	0.96582	4314
GBM	MMP3	Central_memory	-0.996056	0.834267	0.92275	4314
GBM	MMP3	Effector_memory	-0.16428	0.845675	0.925273	4314
GBM	MMP3	NKT	-0.134354	0.944135	0.973911	4314
GBM	MMP3	MAIT	0.130152	0.834719	0.988304	4314
GBM	MMP3	DC	0.181456	0.421557	0.699631	4314
GBM	MMP3	Bcell	-0.0900451	0.883255	0.984058	4314
GBM	MMP3	Monocyte	-0.0224291	0.864991	0.916826	4314
GBM	MMP3	Macrophage	0.0912574	0.74551	0.813152	4314
GBM	MMP3	NK	0.168792	0.610028	0.983135	4314
GBM	MMP3	Neutrophil	-0.113044	0.852849	0.924027	4314
GBM	MMP3	Gamma_delta	-0.5252	0.525776	0.990463	4314
GBM	MMP3	CD4_T	0.0368671	0.901589	0.946697	4314
GBM	MMP3	CD8_T	-0.0820942	0.687784	0.77921	4314
GBM	MMP3	InfiltrationScore	0.0565617	0.65959	0.754395	4314
GBM	MMP9	CD4_naive		0.904411	0.9059	4318
GBM	MMP9	CD8_naive	0.725813	0.203619	0.720854	4318
GBM	MMP9	Cytotoxic	0.127628	0.852862	0.946018	4318
GBM	MMP9	Exhausted		0.0832872	0.198463	4318
GBM	MMP9	Tr1	0.0383887	0.969177	0.981788	4318
GBM	MMP9	nTreg	-1.22878	0.164133	0.259328	4318
GBM	MMP9	iTreg	-1.01757	0.186226	0.394081	4318
GBM	MMP9	Th1	-0.133848	0.6209	0.728845	4318
GBM	MMP9	Th2	-0.39527	0.296837	0.535478	4318
GBM	MMP9	Th17	0.281322	0.417086	0.873533	4318
GBM	MMP9	Tfh	-1.30383	0.262205	0.910968	4318
GBM	MMP9	Central_memory	0.470666	0.788841	0.910493	4318
GBM	MMP9	Effector_memory	-0.328757	0.851775	0.929662	4318
GBM	MMP9	NKT	0.468209	0.533365	0.689121	4318
GBM	MMP9	MAIT	0.0703382	0.963018	0.994443	4318
GBM	MMP9	DC	-0.778983	0.186332	0.446673	4318
GBM	MMP9	Bcell	0.229272	0.521212	0.934761	4318
GBM	MMP9	Monocyte	-0.0454924	0.710667	0.808773	4318
GBM	MMP9	Macrophage	-0.731915	0.249554	0.359961	4318
GBM	MMP9	NK	-0.271793	0.521259	0.983135	4318
GBM	MMP9	Neutrophil	0.0336254	1	1	4318
GBM	MMP9	Gamma_delta	0.571606	0.620463	0.990463	4318
GBM	MMP9	CD4_T	0.144097	0.728008	0.841606	4318
GBM	MMP9	CD8_T	0.0491743	0.907714	0.943491	4318
GBM	MMP9	InfiltrationScore	-0.222994	0.357784	0.475503	4318
GBM	SERPINE1	CD4_naive		0.904411	0.9059	5054
GBM	SERPINE1	CD8_naive	-0.341178	0.846335	0.937983	5054
GBM	SERPINE1	Cytotoxic	0.306362	0.374166	0.751211	5054
GBM	SERPINE1	Exhausted	1.12446	0.195989	0.366714	5054
GBM	SERPINE1	Tr1	-0.450537	0.810665	0.868422	5054
GBM	SERPINE1	nTreg	-0.0285947	0.969172	0.981447	5054
GBM	SERPINE1	iTreg	-0.048851	1	1	5054
GBM	SERPINE1	Th1	0.39812	0.243256	0.370287	5054
GBM	SERPINE1	Th2	0.607236	0.0369349	0.499055	5054
GBM	SERPINE1	Th17	-1.09043	0.120323	0.873533	5054
GBM	SERPINE1	Tfh	0.561911	0.311088	0.910968	5054
GBM	SERPINE1	Central_memory	0.848508	0.162213	0.389076	5054
GBM	SERPINE1	Effector_memory	1.44053	0.0479803	0.120058	5054
GBM	SERPINE1	NKT	-5.87861	0.130921	0.260756	5054
GBM	SERPINE1	MAIT	0.245586	0.337933	0.90581	5054
GBM	SERPINE1	DC	0.246534	0.774924	0.91454	5054
GBM	SERPINE1	Bcell	0.0730581	0.877158	0.984058	5054
GBM	SERPINE1	Monocyte	-0.104776	0.43962	0.57516	5054
GBM	SERPINE1	Macrophage	0.257963	0.311378	0.417241	5054
GBM	SERPINE1	NK	0.276571	0.213436	0.983135	5054
GBM	SERPINE1	Neutrophil	-1.39005	0.0436806	0.365014	5054
GBM	SERPINE1	Gamma_delta	-2.29972	0.0993391	0.990463	5054
GBM	SERPINE1	CD4_T	-0.280926	0.395259	0.590426	5054
GBM	SERPINE1	CD8_T	0.425443	0.122193	0.229403	5054
GBM	SERPINE1	InfiltrationScore	0.107655	0.255969	0.398305	5054
HNSC	ICAM1	CD4_naive	-0.459227	0.555742	0.713893	3383
HNSC	ICAM1	CD8_naive	-0.288514	0.562723	0.899396	3383
HNSC	ICAM1	Cytotoxic	-0.185979	0.229009	0.747304	3383
HNSC	ICAM1	Exhausted	0.194455	0.441971	0.865755	3383
HNSC	ICAM1	Tr1	-0.325282	0.0817533	0.734737	3383
HNSC	ICAM1	nTreg	0.0778422	0.968315	0.995103	3383
HNSC	ICAM1	iTreg	-0.633224	0.060748	0.768725	3383
HNSC	ICAM1	Th1	-0.0932699	0.715438	0.943698	3383
HNSC	ICAM1	Th2	0.0775442	0.732444	0.931621	3383
HNSC	ICAM1	Th17	0.259788	0.135615	0.683177	3383
HNSC	ICAM1	Tfh	-0.518439	0.256973	0.863529	3383
HNSC	ICAM1	Central_memory	-0.238117	0.647752	0.953739	3383
HNSC	ICAM1	Effector_memory	0.258334	0.413499	0.908665	3383
HNSC	ICAM1	NKT	-0.918464	0.152411	0.615894	3383
HNSC	ICAM1	MAIT	0.0292072	0.620535	0.948637	3383
HNSC	ICAM1	DC	0.0408637	0.786434	0.959021	3383
HNSC	ICAM1	Bcell	0.107671	0.282877	0.816279	3383
HNSC	ICAM1	Monocyte	0.0504781	0.70803	0.962644	3383
HNSC	ICAM1	Macrophage	-0.184918	0.45558	0.896346	3383
HNSC	ICAM1	NK	-0.0257602	0.959272	0.992369	3383
HNSC	ICAM1	Neutrophil	0.278743	0.162759	0.828082	3383
HNSC	ICAM1	Gamma_delta	-0.151629	0.630591	0.918991	3383
HNSC	ICAM1	CD4_T	-0.414334	0.0947099	0.629323	3383
HNSC	ICAM1	CD8_T	-0.0963816	0.718616	0.941166	3383
HNSC	ICAM1	InfiltrationScore	-0.0257698	0.578168	0.907089	3383
HNSC	ICAM3	CD4_naive	-2.68382	0.333403	0.713893	3385
HNSC	ICAM3	CD8_naive	0.1777	0.567956	0.901275	3385
HNSC	ICAM3	Cytotoxic	0.0836382	0.750189	0.955444	3385
HNSC	ICAM3	Exhausted	0.359582	0.179332	0.707829	3385
HNSC	ICAM3	Tr1	-0.30391	0.0365845	0.734737	3385
HNSC	ICAM3	nTreg	-0.141086	0.401312	0.865817	3385
HNSC	ICAM3	iTreg	0.168651	0.520887	0.921318	3385
HNSC	ICAM3	Th1	0.333566	0.163111	0.671336	3385
HNSC	ICAM3	Th2	0.441671	0.0394739	0.482924	3385
HNSC	ICAM3	Th17	-0.466504	0.0851144	0.633524	3385
HNSC	ICAM3	Tfh	0.186819	0.602423	0.948663	3385
HNSC	ICAM3	Central_memory	-0.711689	0.299039	0.868389	3385
HNSC	ICAM3	Effector_memory	0.658442	0.15738	0.830265	3385
HNSC	ICAM3	NKT	-0.781596	0.25326	0.695871	3385
HNSC	ICAM3	MAIT	0.16038	0.176539	0.844279	3385
HNSC	ICAM3	DC	-0.302056	0.0721941	0.624562	3385
HNSC	ICAM3	Bcell	-0.490073	0.174884	0.75575	3385
HNSC	ICAM3	Monocyte	-0.516612	0.0244774	0.739493	3385
HNSC	ICAM3	Macrophage	-0.281859	0.286465	0.811285	3385
HNSC	ICAM3	NK	0.5793	0.00454227	0.428136	3385
HNSC	ICAM3	Neutrophil	-0.247384	0.253428	0.852678	3385
HNSC	ICAM3	Gamma_delta	0.388442	0.103822	0.648228	3385
HNSC	ICAM3	CD4_T	0.0620752	0.834152	0.975083	3385
HNSC	ICAM3	CD8_T	0.101822	0.639116	0.913575	3385
HNSC	ICAM3	InfiltrationScore	-0.0383422	0.495387	0.878362	3385
HNSC	ITGA2	CD4_naive		0.373976	0.713893	3673
HNSC	ITGA2	CD8_naive	0.0603955	0.854077	0.974463	3673
HNSC	ITGA2	Cytotoxic	-0.0610237	0.636032	0.929601	3673
HNSC	ITGA2	Exhausted	0.307294	0.0906469	0.610031	3673
HNSC	ITGA2	Tr1	-0.0650508	0.430477	0.899076	3673
HNSC	ITGA2	nTreg	0.0983794	0.409272	0.86845	3673
HNSC	ITGA2	iTreg	0.164796	0.501659	0.917596	3673
HNSC	ITGA2	Th1	0.123783	0.562796	0.900392	3673
HNSC	ITGA2	Th2	-0.216668	0.277885	0.705985	3673
HNSC	ITGA2	Th17	-0.116241	0.465691	0.864248	3673
HNSC	ITGA2	Tfh	-0.587252	0.130239	0.812277	3673
HNSC	ITGA2	Central_memory	-0.0496285	0.850203	0.986459	3673
HNSC	ITGA2	Effector_memory	0.443761	0.324305	0.888772	3673
HNSC	ITGA2	NKT	-0.354824	0.632799	0.889318	3673
HNSC	ITGA2	MAIT	-0.00273126	0.708433	0.962829	3673
HNSC	ITGA2	DC	0.0406274	0.942333	0.991821	3673
HNSC	ITGA2	Bcell	-0.367454	0.198809	0.769703	3673
HNSC	ITGA2	Monocyte	0.139403	0.246601	0.847843	3673
HNSC	ITGA2	Macrophage	0.0595112	0.840643	0.982672	3673
HNSC	ITGA2	NK	0.0798027	0.629052	0.901706	3673
HNSC	ITGA2	Neutrophil	0.191123	0.244118	0.846441	3673
HNSC	ITGA2	Gamma_delta	-0.312352	0.496205	0.873213	3673
HNSC	ITGA2	CD4_T	-0.138668	0.357808	0.804764	3673
HNSC	ITGA2	CD8_T	-0.117134	0.20358	0.704058	3673
HNSC	ITGA2	InfiltrationScore	0.0124602	0.799658	0.964508	3673
HNSC	LCP1	CD4_naive		0.204314	0.713893	3936
HNSC	LCP1	CD8_naive	0.287977	0.148983	0.677773	3936
HNSC	LCP1	Cytotoxic	0.021306	0.696669	0.946594	3936
HNSC	LCP1	Exhausted	-0.00177878	0.996513	0.999724	3936
HNSC	LCP1	Tr1	-0.119883	0.20942	0.812006	3936
HNSC	LCP1	nTreg	0.0953531	0.405829	0.867465	3936
HNSC	LCP1	iTreg	0.221515	0.0713628	0.768725	3936
HNSC	LCP1	Th1	0.0842173	0.617727	0.915932	3936
HNSC	LCP1	Th2	-0.0688716	0.337195	0.743069	3936
HNSC	LCP1	Th17	0.111816	0.449617	0.857301	3936
HNSC	LCP1	Tfh	-0.00915835	0.967228	0.998396	3936
HNSC	LCP1	Central_memory	-0.0683367	0.964436	0.998896	3936
HNSC	LCP1	Effector_memory	-0.32711	0.52041	0.933931	3936
HNSC	LCP1	NKT	-0.0163124	0.945549	0.990354	3936
HNSC	LCP1	MAIT	0.056462	0.450126	0.914888	3936
HNSC	LCP1	DC	0.0145969	0.905377	0.983575	3936
HNSC	LCP1	Bcell	-0.181237	0.386375	0.861449	3936
HNSC	LCP1	Monocyte	-0.0833116	0.313555	0.869545	3936
HNSC	LCP1	Macrophage	-0.172124	0.264737	0.797913	3936
HNSC	LCP1	NK	-0.0363958	0.753689	0.942885	3936
HNSC	LCP1	Neutrophil	-0.0567831	0.685068	0.9535	3936
HNSC	LCP1	Gamma_delta	-0.0821424	0.762328	0.957408	3936
HNSC	LCP1	CD4_T	-0.161373	0.246103	0.736858	3936
HNSC	LCP1	CD8_T	0.181819	0.0264735	0.470453	3936
HNSC	LCP1	InfiltrationScore	-0.0314038	0.336772	0.808356	3936
HNSC	MMP1	CD4_naive		0.442179	0.713893	4312
HNSC	MMP1	CD8_naive	-0.645043	0.201587	0.722114	4312
HNSC	MMP1	Cytotoxic	0.123048	0.45136	0.869107	4312
HNSC	MMP1	Exhausted	0.240088	0.440365	0.86451	4312
HNSC	MMP1	Tr1	-0.0276556	0.631272	0.943467	4312
HNSC	MMP1	nTreg	0.0310639	0.962736	0.994501	4312
HNSC	MMP1	iTreg	0.0508535	0.952586	0.996085	4312
HNSC	MMP1	Th1	0.10306	0.70649	0.94271	4312
HNSC	MMP1	Th2	0.279087	0.0904135	0.529365	4312
HNSC	MMP1	Th17	-0.110869	0.850649	0.972762	4312
HNSC	MMP1	Tfh	0.332316	0.314758	0.882584	4312
HNSC	MMP1	Central_memory	0.00929033	0.859502	0.98771	4312
HNSC	MMP1	Effector_memory	-0.248011	0.737553	0.968626	4312
HNSC	MMP1	NKT	-0.574333	0.305844	0.734279	4312
HNSC	MMP1	MAIT	0.0221533	0.567344	0.943823	4312
HNSC	MMP1	DC	-0.0317559	0.695991	0.935443	4312
HNSC	MMP1	Bcell	-0.593602	0.0816169	0.703576	4312
HNSC	MMP1	Monocyte	0.164639	0.240539	0.844257	4312
HNSC	MMP1	Macrophage	0.295078	0.219672	0.78059	4312
HNSC	MMP1	NK	0.382865	0.0706314	0.505697	4312
HNSC	MMP1	Neutrophil	-0.106149	0.554956	0.92758	4312
HNSC	MMP1	Gamma_delta	0.517214	0.249737	0.764372	4312
HNSC	MMP1	CD4_T	-0.124354	0.406759	0.828512	4312
HNSC	MMP1	CD8_T	0.0235221	0.83625	0.96997	4312
HNSC	MMP1	InfiltrationScore	0.0778281	0.321004	0.800182	4312
HNSC	MMP10	CD4_naive	0.995076	0.081142	0.713893	4319
HNSC	MMP10	CD8_naive	-0.0200321	0.894362	0.980935	4319
HNSC	MMP10	Cytotoxic	0.0052189	0.743407	0.954275	4319
HNSC	MMP10	Exhausted	-0.274034	0.293523	0.795481	4319
HNSC	MMP10	Tr1	0.230845	0.0455401	0.734737	4319
HNSC	MMP10	nTreg	0.0558206	0.788545	0.97282	4319
HNSC	MMP10	iTreg	-0.0631027	0.914153	0.990365	4319
HNSC	MMP10	Th1	-0.0537031	0.689415	0.938789	4319
HNSC	MMP10	Th2	-0.00523707	0.974829	0.996863	4319
HNSC	MMP10	Th17	0.0542208	0.746388	0.945787	4319
HNSC	MMP10	Tfh	-0.0408012	0.946537	0.997231	4319
HNSC	MMP10	Central_memory	0.28001	0.36423	0.892976	4319
HNSC	MMP10	Effector_memory	0.65077	0.163903	0.830265	4319
HNSC	MMP10	NKT	-0.445533	0.355883	0.763601	4319
HNSC	MMP10	MAIT	-0.0600092	0.289904	0.874851	4319
HNSC	MMP10	DC	-0.17127	0.248929	0.751268	4319
HNSC	MMP10	Bcell	0.0757354	0.676855	0.95801	4319
HNSC	MMP10	Monocyte	-0.0512423	0.585349	0.935736	4319
HNSC	MMP10	Macrophage	0.0178234	0.786534	0.973706	4319
HNSC	MMP10	NK	0.0239918	0.852944	0.971115	4319
HNSC	MMP10	Neutrophil	0.0179989	0.71574	0.960922	4319
HNSC	MMP10	Gamma_delta	0.175577	0.374862	0.83149	4319
HNSC	MMP10	CD4_T	0.0961245	0.576347	0.895404	4319
HNSC	MMP10	CD8_T	-0.0260618	0.730518	0.944375	4319
HNSC	MMP10	InfiltrationScore	-0.0118895	0.965396	0.995211	4319
HNSC	MMP13	CD4_naive		0.345054	0.713893	4322
HNSC	MMP13	CD8_naive	-0.405092	0.171743	0.693027	4322
HNSC	MMP13	Cytotoxic	0.0858978	0.466727	0.874797	4322
HNSC	MMP13	Exhausted	0.188441	0.540457	0.898929	4322
HNSC	MMP13	Tr1	0.154386	0.182145	0.795294	4322
HNSC	MMP13	nTreg	0.16211	0.310186	0.830034	4322
HNSC	MMP13	iTreg	0.25758	0.192606	0.820931	4322
HNSC	MMP13	Th1	0.0721377	0.706015	0.942674	4322
HNSC	MMP13	Th2	0.0891158	0.42597	0.801628	4322
HNSC	MMP13	Th17	-0.344223	0.137349	0.683177	4322
HNSC	MMP13	Tfh	0.204398	0.562837	0.939763	4322
HNSC	MMP13	Central_memory	0.298473	0.279694	0.861395	4322
HNSC	MMP13	Effector_memory	-1.29101	0.107816	0.778738	4322
HNSC	MMP13	NKT	-0.703925	0.150609	0.615831	4322
HNSC	MMP13	MAIT	0.0314406	0.836812	0.979381	4322
HNSC	MMP13	DC	0.00219371	0.900548	0.983329	4322
HNSC	MMP13	Bcell	0.0300993	0.813387	0.979469	4322
HNSC	MMP13	Monocyte	-0.124743	0.4253	0.900483	4322
HNSC	MMP13	Macrophage	0.178788	0.312428	0.828845	4322
HNSC	MMP13	NK	-0.0286076	0.927166	0.9862	4322
HNSC	MMP13	Neutrophil	-0.126989	0.529801	0.924693	4322
HNSC	MMP13	Gamma_delta	0.243604	0.433407	0.851171	4322
HNSC	MMP13	CD4_T	0.000192631	0.94465	0.993935	4322
HNSC	MMP13	CD8_T	0.202442	0.127244	0.616039	4322
HNSC	MMP13	InfiltrationScore	0.038049	0.585761	0.908988	4322
HNSC	MMP14	CD4_naive	1.03554	0.272341	0.713893	4323
HNSC	MMP14	CD8_naive	0.69775	0.0360504	0.568355	4323
HNSC	MMP14	Cytotoxic	-0.141151	0.432201	0.861488	4323
HNSC	MMP14	Exhausted	0.0186505	0.827062	0.975025	4323
HNSC	MMP14	Tr1	-0.130759	0.328971	0.867326	4323
HNSC	MMP14	nTreg	-0.295434	0.336752	0.835304	4323
HNSC	MMP14	iTreg	-0.091898	0.781459	0.969995	4323
HNSC	MMP14	Th1	-0.295924	0.434237	0.847748	4323
HNSC	MMP14	Th2	-0.586955	0.0970478	0.537228	4323
HNSC	MMP14	Th17	-0.0112262	0.933672	0.989816	4323
HNSC	MMP14	Tfh	-0.629717	0.218894	0.852365	4323
HNSC	MMP14	Central_memory	-0.232981	0.602863	0.943744	4323
HNSC	MMP14	Effector_memory	0.41148	0.598844	0.944044	4323
HNSC	MMP14	NKT	-0.40541	0.591452	0.873234	4323
HNSC	MMP14	MAIT	0.106978	0.464342	0.920933	4323
HNSC	MMP14	DC	-0.377324	0.101316	0.643726	4323
HNSC	MMP14	Bcell	-0.0740419	0.947466	0.995136	4323
HNSC	MMP14	Monocyte	0.16675	0.346448	0.872909	4323
HNSC	MMP14	Macrophage	-0.388968	0.241865	0.789207	4323
HNSC	MMP14	NK	-0.199548	0.409196	0.803539	4323
HNSC	MMP14	Neutrophil	-0.0316014	0.964043	0.996251	4323
HNSC	MMP14	Gamma_delta	-0.143486	0.893791	0.976518	4323
HNSC	MMP14	CD4_T	0.0173479	0.969572	0.994964	4323
HNSC	MMP14	CD8_T	-0.115467	0.546256	0.882071	4323
HNSC	MMP14	InfiltrationScore	-0.140636	0.0628285	0.600482	4323
HNSC	MMP2	CD4_naive		0.44268	0.713893	4313
HNSC	MMP2	CD8_naive	0.232342	0.274737	0.768416	4313
HNSC	MMP2	Cytotoxic	-0.181853	0.0643942	0.610942	4313
HNSC	MMP2	Exhausted	-0.163431	0.39658	0.845501	4313
HNSC	MMP2	Tr1	0.147516	0.243754	0.8329	4313
HNSC	MMP2	nTreg	-0.0096159	0.815656	0.975597	4313
HNSC	MMP2	iTreg	-0.184333	0.435443	0.896213	4313
HNSC	MMP2	Th1	-0.361927	0.189335	0.693913	4313
HNSC	MMP2	Th2	0.049104	0.843196	0.963899	4313
HNSC	MMP2	Th17	-0.103694	0.822252	0.967991	4313
HNSC	MMP2	Tfh	-0.400343	0.31233	0.882584	4313
HNSC	MMP2	Central_memory	0.45343	0.149047	0.810018	4313
HNSC	MMP2	Effector_memory	0.355678	0.641304	0.954679	4313
HNSC	MMP2	NKT	-0.350667	0.434623	0.806739	4313
HNSC	MMP2	MAIT	0.0672716	0.288639	0.873476	4313
HNSC	MMP2	DC	-0.252439	0.14677	0.677026	4313
HNSC	MMP2	Bcell	0.0146893	0.910003	0.991573	4313
HNSC	MMP2	Monocyte	0.0956325	0.607045	0.936034	4313
HNSC	MMP2	Macrophage	-0.229821	0.548197	0.923049	4313
HNSC	MMP2	NK	-0.613425	0.0322013	0.464179	4313
HNSC	MMP2	Neutrophil	0.278198	0.0876046	0.828082	4313
HNSC	MMP2	Gamma_delta	-0.115946	0.441281	0.852621	4313
HNSC	MMP2	CD4_T	-0.173632	0.387987	0.819558	4313
[truncated: 3,427 more rows]
