# Supplementary material for: Pan-cancer analyses of senescence-related genes in extracellular matrix characterization in cancer
Source: Discov Oncol. 2023 Nov 20;14:208. doi: 10.1007/s12672-023-00828-7 (PMC10660488; doi:10.1007/s12672-023-00828-7)
Supplement: Supplementary file 11 — Supplementary file11 (XLSX 806 KB) [file 12672_2023_828_MOESM11_ESM.xlsx]

## Sheet: SheetName
Table S6 Correlation between gene CNV and immune infiltration in 33 cancers
cancertype	symbol	cell_type	cor	p_value	fdr	entrez
ACC	FGF2	Bcell	0.0437652	0.705477	0.885194	2247
ACC	FGF2	CD4_T	0.0978135	0.397384	0.921928	2247
ACC	FGF2	CD4_naive	0.203336	0.0761197	0.249562	2247
ACC	FGF2	CD8_T	0.0977098	0.397887	0.698052	2247
ACC	FGF2	CD8_naive	0.323575	0.00409729	0.0210648	2247
ACC	FGF2	Central_memory	0.201369	0.0790648	0.519099	2247
ACC	FGF2	Cytotoxic	0.0393024	0.734333	0.952058	2247
ACC	FGF2	DC	-0.313237	0.00553959	0.0408928	2247
ACC	FGF2	Effector_memory	-0.145784	0.205836	0.992918	2247
ACC	FGF2	Exhausted	-0.159318	0.166357	0.48936	2247
ACC	FGF2	Gamma_delta	0.475469	1.2433e-05	0.000739013	2247
ACC	FGF2	InfiltrationScore	-0.16208	0.159037	0.294	2247
ACC	FGF2	MAIT	0.170133	0.13906	0.429432	2247
ACC	FGF2	Macrophage	-0.228755	0.0453815	0.118142	2247
ACC	FGF2	Monocyte	-0.055236	0.633269	0.991086	2247
ACC	FGF2	NK	0.00209691	0.98556	0.992727	2247
ACC	FGF2	NKT	0.0157629	0.89177	0.998036	2247
ACC	FGF2	Neutrophil	-0.100018	0.386781	0.633317	2247
ACC	FGF2	Tfh	-0.00996335	0.931466	0.961242	2247
ACC	FGF2	Th1	-0.116476	0.313074	0.564334	2247
ACC	FGF2	Th17	0.0766015	0.507872	0.717335	2247
ACC	FGF2	Th2	-0.0136114	0.906471	0.967855	2247
ACC	FGF2	Tr1	-0.0850098	0.462285	0.825306	2247
ACC	FGF2	iTreg	-0.290695	0.0103247	0.043786	2247
ACC	FGF2	nTreg	-0.245457	0.0314227	0.161477	2247
ACC	ICAM1	Bcell	0.368507	0.000975103	0.0111296	3383
ACC	ICAM1	CD4_T	0.0339773	0.769249	0.95536	3383
ACC	ICAM1	CD4_naive	0.396654	0.000355103	0.00680492	3383
ACC	ICAM1	CD8_T	-0.376103	0.000748985	0.0132043	3383
ACC	ICAM1	CD8_naive	0.357858	0.00139661	0.0109208	3383
ACC	ICAM1	Central_memory	0.123503	0.284569	0.688954	3383
ACC	ICAM1	Cytotoxic	-0.418442	0.000152424	0.0049668	3383
ACC	ICAM1	DC	-0.248603	0.0292461	0.0979339	3383
ACC	ICAM1	Effector_memory	-0.102922	0.37307	0.992918	3383
ACC	ICAM1	Exhausted	-0.377766	0.000706351	0.0289704	3383
ACC	ICAM1	Gamma_delta	0.225345	0.0487839	0.117002	3383
ACC	ICAM1	InfiltrationScore	-0.449461	4.1215e-05	0.00211373	3383
ACC	ICAM1	MAIT	-0.252082	0.0269888	0.127476	3383
ACC	ICAM1	Macrophage	-0.396561	0.000356336	0.0212824	3383
ACC	ICAM1	Monocyte	0.0603644	0.602013	0.991086	3383
ACC	ICAM1	NK	-0.375	0.000778553	0.0168436	3383
ACC	ICAM1	NKT	-0.242406	0.0336619	0.393487	3383
ACC	ICAM1	Neutrophil	0.238063	0.0370784	0.133524	3383
ACC	ICAM1	Tfh	-0.391311	0.000433165	0.014631	3383
ACC	ICAM1	Th1	-0.470025	1.6109e-05	0.000787176	3383
ACC	ICAM1	Th17	0.292624	0.009807	0.0653608	3383
ACC	ICAM1	Th2	-0.315498	0.00519049	0.0374346	3383
ACC	ICAM1	Tr1	0.0117302	0.91935	0.970813	3383
ACC	ICAM1	iTreg	-0.350029	0.00180481	0.0154532	3383
ACC	ICAM1	nTreg	-0.267852	0.0185147	0.12442	3383
ACC	ICAM3	Bcell	0.368507	0.000975103	0.0111296	3385
ACC	ICAM3	CD4_T	0.0339773	0.769249	0.95536	3385
ACC	ICAM3	CD4_naive	0.396654	0.000355103	0.00680492	3385
ACC	ICAM3	CD8_T	-0.376103	0.000748985	0.0132043	3385
ACC	ICAM3	CD8_naive	0.357858	0.00139661	0.0109208	3385
ACC	ICAM3	Central_memory	0.123503	0.284569	0.688954	3385
ACC	ICAM3	Cytotoxic	-0.418442	0.000152424	0.0049668	3385
ACC	ICAM3	DC	-0.248603	0.0292461	0.0979339	3385
ACC	ICAM3	Effector_memory	-0.102922	0.37307	0.992918	3385
ACC	ICAM3	Exhausted	-0.377766	0.000706351	0.0289704	3385
ACC	ICAM3	Gamma_delta	0.225345	0.0487839	0.117002	3385
ACC	ICAM3	InfiltrationScore	-0.449461	4.1215e-05	0.00211373	3385
ACC	ICAM3	MAIT	-0.252082	0.0269888	0.127476	3385
ACC	ICAM3	Macrophage	-0.396561	0.000356336	0.0212824	3385
ACC	ICAM3	Monocyte	0.0603644	0.602013	0.991086	3385
ACC	ICAM3	NK	-0.375	0.000778553	0.0168436	3385
ACC	ICAM3	NKT	-0.242406	0.0336619	0.393487	3385
ACC	ICAM3	Neutrophil	0.238063	0.0370784	0.133524	3385
ACC	ICAM3	Tfh	-0.391311	0.000433165	0.014631	3385
ACC	ICAM3	Th1	-0.470025	1.6109e-05	0.000787176	3385
ACC	ICAM3	Th17	0.292624	0.009807	0.0653608	3385
ACC	ICAM3	Th2	-0.315498	0.00519049	0.0374346	3385
ACC	ICAM3	Tr1	0.0117302	0.91935	0.970813	3385
ACC	ICAM3	iTreg	-0.350029	0.00180481	0.0154532	3385
ACC	ICAM3	nTreg	-0.267852	0.0185147	0.12442	3385
ACC	ITGA2	Bcell	0.11972	0.299691	0.698984	3673
ACC	ITGA2	CD4_T	-0.0945967	0.413161	0.921928	3673
ACC	ITGA2	CD4_naive	0.316679	0.00501597	0.0345605	3673
ACC	ITGA2	CD8_T	-0.0350734	0.762022	0.947967	3673
ACC	ITGA2	CD8_naive	0.302365	0.00752409	0.0310218	3673
ACC	ITGA2	Central_memory	0.183452	0.110257	0.546335	3673
ACC	ITGA2	Cytotoxic	-0.0882531	0.445319	0.835651	3673
ACC	ITGA2	DC	-0.379605	0.000661783	0.0250585	3673
ACC	ITGA2	Effector_memory	-0.0709784	0.539599	0.992918	3673
ACC	ITGA2	Exhausted	-0.161993	0.159264	0.477436	3673
ACC	ITGA2	Gamma_delta	0.449661	4.0852e-05	0.000792707	3673
ACC	ITGA2	InfiltrationScore	-0.382121	0.000604976	0.00589715	3673
ACC	ITGA2	MAIT	0.0972091	0.400321	0.645535	3673
ACC	ITGA2	Macrophage	-0.33635	0.00278205	0.0253745	3673
ACC	ITGA2	Monocyte	-0.11246	0.330163	0.991086	3673
ACC	ITGA2	NK	-0.126355	0.273508	0.476054	3673
ACC	ITGA2	NKT	0.00840038	0.942197	0.998036	3673
ACC	ITGA2	Neutrophil	-0.0432928	0.708513	0.889931	3673
ACC	ITGA2	Tfh	-0.132171	0.251853	0.506401	3673
ACC	ITGA2	Th1	-0.109544	0.342937	0.582089	3673
ACC	ITGA2	Th17	0.15896	0.167324	0.425437	3673
ACC	ITGA2	Th2	-0.0786941	0.496315	0.777184	3673
ACC	ITGA2	Tr1	-0.112421	0.330332	0.784678	3673
ACC	ITGA2	iTreg	-0.25615	0.0245377	0.0819223	3673
ACC	ITGA2	nTreg	-0.06728	0.560983	0.776856	3673
ACC	LCP1	Bcell	-0.143402	0.213424	0.622369	3936
ACC	LCP1	CD4_T	-0.102572	0.374708	0.921928	3936
ACC	LCP1	CD4_naive	-0.0524122	0.650762	0.842724	3936
ACC	LCP1	CD8_T	0.0948105	0.412101	0.710444	3936
ACC	LCP1	CD8_naive	0.164596	0.15258	0.287253	3936
ACC	LCP1	Central_memory	-0.172872	0.132717	0.546335	3936
ACC	LCP1	Cytotoxic	0.0546145	0.637102	0.925755	3936
ACC	LCP1	DC	0.019405	0.86697	0.910756	3936
ACC	LCP1	Effector_memory	-0.098149	0.395759	0.992918	3936
ACC	LCP1	Exhausted	0.00176457	0.987848	0.99564	3936
ACC	LCP1	Gamma_delta	-0.0100588	0.930811	0.998725	3936
ACC	LCP1	InfiltrationScore	-0.0376528	0.745096	0.862154	3936
ACC	LCP1	MAIT	0.124864	0.279252	0.585593	3936
ACC	LCP1	Macrophage	0.0558108	0.629732	0.793033	3936
ACC	LCP1	Monocyte	0.0558959	0.629209	0.991086	3936
ACC	LCP1	NK	-0.0469765	0.684964	0.823903	3936
ACC	LCP1	NKT	-0.00695989	0.952096	0.998036	3936
ACC	LCP1	Neutrophil	-0.112632	0.32942	0.585996	3936
ACC	LCP1	Tfh	-0.0397579	0.73137	0.855209	3936
ACC	LCP1	Th1	-0.0587168	0.61198	0.773738	3936
ACC	LCP1	Th17	0.142372	0.216765	0.458615	3936
ACC	LCP1	Th2	0.0856094	0.459122	0.764818	3936
ACC	LCP1	Tr1	-0.0501353	0.665006	0.918334	3936
ACC	LCP1	iTreg	-0.00157638	0.989144	0.991526	3936
ACC	LCP1	nTreg	0.00732246	0.949604	0.988806	3936
ACC	MMP1	Bcell	-0.0608005	0.599387	0.861313	4312
ACC	MMP1	CD4_T	-0.0420214	0.716705	0.952813	4312
ACC	MMP1	CD4_naive	-0.13952	0.226206	0.479266	4312
ACC	MMP1	CD8_T	0.051906	0.653918	0.874889	4312
ACC	MMP1	CD8_naive	-0.224478	0.0496817	0.131683	4312
ACC	MMP1	Central_memory	-0.241451	0.0343894	0.47118	4312
ACC	MMP1	Cytotoxic	0.0371471	0.748405	0.952058	4312
ACC	MMP1	DC	0.0558207	0.629672	0.745168	4312
ACC	MMP1	Effector_memory	0.0717847	0.534991	0.992918	4312
ACC	MMP1	Exhausted	0.0970139	0.401272	0.675852	4312
ACC	MMP1	Gamma_delta	-0.175625	0.126562	0.239459	4312
ACC	MMP1	InfiltrationScore	0.0882568	0.4453	0.651597	4312
ACC	MMP1	MAIT	-0.0210756	0.855635	0.954512	4312
ACC	MMP1	Macrophage	0.0233624	0.840168	0.947263	4312
ACC	MMP1	Monocyte	-0.0282365	0.807409	0.991086	4312
ACC	MMP1	NK	0.206664	0.0713362	0.243149	4312
ACC	MMP1	NKT	-0.027875	0.809828	0.998036	4312
ACC	MMP1	Neutrophil	-0.0109066	0.924996	0.973704	4312
ACC	MMP1	Tfh	0.0699698	0.545391	0.731752	4312
ACC	MMP1	Th1	0.0843002	0.466044	0.669083	4312
ACC	MMP1	Th17	0.017402	0.880595	0.950051	4312
ACC	MMP1	Th2	0.180537	0.116128	0.305058	4312
ACC	MMP1	Tr1	-0.0509977	0.659597	0.918334	4312
ACC	MMP1	iTreg	0.190625	0.0967869	0.222268	4312
ACC	MMP1	nTreg	0.139766	0.225382	0.536624	4312
ACC	MMP10	Bcell	-0.0608005	0.599387	0.861313	4319
ACC	MMP10	CD4_T	-0.0420214	0.716705	0.952813	4319
ACC	MMP10	CD4_naive	-0.13952	0.226206	0.479266	4319
ACC	MMP10	CD8_T	0.051906	0.653918	0.874889	4319
ACC	MMP10	CD8_naive	-0.224478	0.0496817	0.131683	4319
ACC	MMP10	Central_memory	-0.241451	0.0343894	0.47118	4319
ACC	MMP10	Cytotoxic	0.0371471	0.748405	0.952058	4319
ACC	MMP10	DC	0.0558207	0.629672	0.745168	4319
ACC	MMP10	Effector_memory	0.0717847	0.534991	0.992918	4319
ACC	MMP10	Exhausted	0.0970139	0.401272	0.675852	4319
ACC	MMP10	Gamma_delta	-0.175625	0.126562	0.239459	4319
ACC	MMP10	InfiltrationScore	0.0882568	0.4453	0.651597	4319
ACC	MMP10	MAIT	-0.0210756	0.855635	0.954512	4319
ACC	MMP10	Macrophage	0.0233624	0.840168	0.947263	4319
ACC	MMP10	Monocyte	-0.0282365	0.807409	0.991086	4319
ACC	MMP10	NK	0.206664	0.0713362	0.243149	4319
ACC	MMP10	NKT	-0.027875	0.809828	0.998036	4319
ACC	MMP10	Neutrophil	-0.0109066	0.924996	0.973704	4319
ACC	MMP10	Tfh	0.0699698	0.545391	0.731752	4319
ACC	MMP10	Th1	0.0843002	0.466044	0.669083	4319
ACC	MMP10	Th17	0.017402	0.880595	0.950051	4319
ACC	MMP10	Th2	0.180537	0.116128	0.305058	4319
ACC	MMP10	Tr1	-0.0509977	0.659597	0.918334	4319
ACC	MMP10	iTreg	0.190625	0.0967869	0.222268	4319
ACC	MMP10	nTreg	0.139766	0.225382	0.536624	4319
ACC	MMP12	Bcell	-0.0608005	0.599387	0.861313	4321
ACC	MMP12	CD4_T	-0.0420214	0.716705	0.952813	4321
ACC	MMP12	CD4_naive	-0.13952	0.226206	0.479266	4321
ACC	MMP12	CD8_T	0.051906	0.653918	0.874889	4321
ACC	MMP12	CD8_naive	-0.224478	0.0496817	0.131683	4321
ACC	MMP12	Central_memory	-0.241451	0.0343894	0.47118	4321
ACC	MMP12	Cytotoxic	0.0371471	0.748405	0.952058	4321
ACC	MMP12	DC	0.0558207	0.629672	0.745168	4321
ACC	MMP12	Effector_memory	0.0717847	0.534991	0.992918	4321
ACC	MMP12	Exhausted	0.0970139	0.401272	0.675852	4321
ACC	MMP12	Gamma_delta	-0.175625	0.126562	0.239459	4321
ACC	MMP12	InfiltrationScore	0.0882568	0.4453	0.651597	4321
ACC	MMP12	MAIT	-0.0210756	0.855635	0.954512	4321
ACC	MMP12	Macrophage	0.0233624	0.840168	0.947263	4321
ACC	MMP12	Monocyte	-0.0282365	0.807409	0.991086	4321
ACC	MMP12	NK	0.206664	0.0713362	0.243149	4321
ACC	MMP12	NKT	-0.027875	0.809828	0.998036	4321
ACC	MMP12	Neutrophil	-0.0109066	0.924996	0.973704	4321
ACC	MMP12	Tfh	0.0699698	0.545391	0.731752	4321
ACC	MMP12	Th1	0.0843002	0.466044	0.669083	4321
ACC	MMP12	Th17	0.017402	0.880595	0.950051	4321
ACC	MMP12	Th2	0.180537	0.116128	0.305058	4321
ACC	MMP12	Tr1	-0.0509977	0.659597	0.918334	4321
ACC	MMP12	iTreg	0.190625	0.0967869	0.222268	4321
ACC	MMP12	nTreg	0.139766	0.225382	0.536624	4321
ACC	MMP13	Bcell	-0.0608005	0.599387	0.861313	4322
ACC	MMP13	CD4_T	-0.0420214	0.716705	0.952813	4322
ACC	MMP13	CD4_naive	-0.13952	0.226206	0.479266	4322
ACC	MMP13	CD8_T	0.051906	0.653918	0.874889	4322
ACC	MMP13	CD8_naive	-0.224478	0.0496817	0.131683	4322
ACC	MMP13	Central_memory	-0.241451	0.0343894	0.47118	4322
ACC	MMP13	Cytotoxic	0.0371471	0.748405	0.952058	4322
ACC	MMP13	DC	0.0558207	0.629672	0.745168	4322
ACC	MMP13	Effector_memory	0.0717847	0.534991	0.992918	4322
ACC	MMP13	Exhausted	0.0970139	0.401272	0.675852	4322
ACC	MMP13	Gamma_delta	-0.175625	0.126562	0.239459	4322
ACC	MMP13	InfiltrationScore	0.0882568	0.4453	0.651597	4322
ACC	MMP13	MAIT	-0.0210756	0.855635	0.954512	4322
ACC	MMP13	Macrophage	0.0233624	0.840168	0.947263	4322
ACC	MMP13	Monocyte	-0.0282365	0.807409	0.991086	4322
ACC	MMP13	NK	0.206664	0.0713362	0.243149	4322
ACC	MMP13	NKT	-0.027875	0.809828	0.998036	4322
ACC	MMP13	Neutrophil	-0.0109066	0.924996	0.973704	4322
ACC	MMP13	Tfh	0.0699698	0.545391	0.731752	4322
ACC	MMP13	Th1	0.0843002	0.466044	0.669083	4322
ACC	MMP13	Th17	0.017402	0.880595	0.950051	4322
ACC	MMP13	Th2	0.180537	0.116128	0.305058	4322
ACC	MMP13	Tr1	-0.0509977	0.659597	0.918334	4322
ACC	MMP13	iTreg	0.190625	0.0967869	0.222268	4322
ACC	MMP13	nTreg	0.139766	0.225382	0.536624	4322
ACC	MMP14	Bcell	0.471939	1.4714e-05	0.000826175	4323
ACC	MMP14	CD4_T	-0.234177	0.0403756	0.687694	4323
ACC	MMP14	CD4_naive	0.462671	2.2697e-05	0.00178653	4323
ACC	MMP14	CD8_T	-0.469461	1.6542e-05	0.00138311	4323
ACC	MMP14	CD8_naive	0.223647	0.0505554	0.131683	4323
ACC	MMP14	Central_memory	0.0643075	0.578456	0.800651	4323
ACC	MMP14	Cytotoxic	-0.50888	2.29371e-06	0.000253844	4323
ACC	MMP14	DC	-0.157267	0.171951	0.326189	4323
ACC	MMP14	Effector_memory	-0.336599	0.00276069	0.27579	4323
ACC	MMP14	Exhausted	-0.404134	0.000267344	0.0196397	4323
ACC	MMP14	Gamma_delta	0.0156014	0.892872	0.998725	4323
ACC	MMP14	InfiltrationScore	-0.417975	0.000155308	0.00347603	4323
ACC	MMP14	MAIT	-0.358608	0.00136225	0.027116	4323
ACC	MMP14	Macrophage	-0.359961	0.0013022	0.0229775	4323
ACC	MMP14	Monocyte	0.0814428	0.481346	0.991086	4323
ACC	MMP14	NK	-0.371691	0.000873689	0.0168436	4323
ACC	MMP14	NKT	-0.164047	0.153971	0.568998	4323
ACC	MMP14	Neutrophil	0.481742	9.17443e-06	0.000828924	4323
ACC	MMP14	Tfh	-0.479744	1.0113e-05	0.000982804	4323
ACC	MMP14	Th1	-0.504358	2.91388e-06	0.000181916	4323
ACC	MMP14	Th17	0.466789	1.875e-05	0.00186931	4323
ACC	MMP14	Th2	-0.455461	3.1528e-05	0.00189909	4323
ACC	MMP14	Tr1	-0.0685044	0.553859	0.875178	4323
ACC	MMP14	iTreg	-0.420141	0.000142344	0.00361881	4323
ACC	MMP14	nTreg	-0.288147	0.0110451	0.0992186	4323
ACC	MMP2	Bcell	-0.0435117	0.707105	0.885892	4313
ACC	MMP2	CD4_T	-0.0875376	0.449032	0.923365	4313
ACC	MMP2	CD4_naive	0.237402	0.0376227	0.141752	4313
ACC	MMP2	CD8_T	0.102684	0.374185	0.673797	4313
ACC	MMP2	CD8_naive	0.369222	0.000951452	0.0092449	4313
ACC	MMP2	Central_memory	0.149487	0.194428	0.605366	4313
ACC	MMP2	Cytotoxic	0.0847963	0.463414	0.845851	4313
ACC	MMP2	DC	-0.251847	0.0271364	0.0939339	4313
ACC	MMP2	Effector_memory	-0.0480606	0.678089	0.992918	4313
ACC	MMP2	Exhausted	-0.0560359	0.62835	0.790693	4313
ACC	MMP2	Gamma_delta	0.389298	0.000466427	0.00357945	4313
ACC	MMP2	InfiltrationScore	-0.240027	0.0354992	0.102688	4313
ACC	MMP2	MAIT	0.19371	0.0914072	0.305395	4313
ACC	MMP2	Macrophage	-0.192276	0.0938781	0.196902	4313
ACC	MMP2	Monocyte	-0.011839	0.918605	0.991086	4313
ACC	MMP2	NK	-0.0237936	0.837258	0.922576	4313
ACC	MMP2	NKT	0.108515	0.347516	0.835265	4313
ACC	MMP2	Neutrophil	-0.212686	0.0632983	0.186685	4313
ACC	MMP2	Tfh	0.0514663	0.656665	0.809215	4313
ACC	MMP2	Th1	-0.0628241	0.587268	0.758375	4313
ACC	MMP2	Th17	-0.0395464	0.732745	0.863367	4313
ACC	MMP2	Th2	0.0463827	0.68874	0.866463	4313
ACC	MMP2	Tr1	-0.135546	0.239838	0.77968	4313
ACC	MMP2	iTreg	-0.229974	0.0442137	0.129846	4313
ACC	MMP2	nTreg	-0.0790136	0.494563	0.736116	4313
ACC	MMP3	Bcell	-0.0608005	0.599387	0.861313	4314
ACC	MMP3	CD4_T	-0.0420214	0.716705	0.952813	4314
ACC	MMP3	CD4_naive	-0.13952	0.226206	0.479266	4314
ACC	MMP3	CD8_T	0.051906	0.653918	0.874889	4314
ACC	MMP3	CD8_naive	-0.224478	0.0496817	0.131683	4314
ACC	MMP3	Central_memory	-0.241451	0.0343894	0.47118	4314
ACC	MMP3	Cytotoxic	0.0371471	0.748405	0.952058	4314
ACC	MMP3	DC	0.0558207	0.629672	0.745168	4314
ACC	MMP3	Effector_memory	0.0717847	0.534991	0.992918	4314
ACC	MMP3	Exhausted	0.0970139	0.401272	0.675852	4314
ACC	MMP3	Gamma_delta	-0.175625	0.126562	0.239459	4314
ACC	MMP3	InfiltrationScore	0.0882568	0.4453	0.651597	4314
ACC	MMP3	MAIT	-0.0210756	0.855635	0.954512	4314
ACC	MMP3	Macrophage	0.0233624	0.840168	0.947263	4314
ACC	MMP3	Monocyte	-0.0282365	0.807409	0.991086	4314
ACC	MMP3	NK	0.206664	0.0713362	0.243149	4314
ACC	MMP3	NKT	-0.027875	0.809828	0.998036	4314
ACC	MMP3	Neutrophil	-0.0109066	0.924996	0.973704	4314
ACC	MMP3	Tfh	0.0699698	0.545391	0.731752	4314
ACC	MMP3	Th1	0.0843002	0.466044	0.669083	4314
ACC	MMP3	Th17	0.017402	0.880595	0.950051	4314
ACC	MMP3	Th2	0.180537	0.116128	0.305058	4314
ACC	MMP3	Tr1	-0.0509977	0.659597	0.918334	4314
ACC	MMP3	iTreg	0.190625	0.0967869	0.222268	4314
ACC	MMP3	nTreg	0.139766	0.225382	0.536624	4314
ACC	MMP9	Bcell	-0.20535	0.0731956	0.282546	4318
ACC	MMP9	CD4_T	-0.0562348	0.627129	0.943661	4318
ACC	MMP9	CD4_naive	-0.161405	0.160805	0.401145	4318
ACC	MMP9	CD8_T	0.31547	0.00519468	0.0366431	4318
ACC	MMP9	CD8_naive	0.19777	0.0846871	0.192512	4318
ACC	MMP9	Central_memory	0.0491919	0.670943	0.85624	4318
ACC	MMP9	Cytotoxic	0.279916	0.0136791	0.0666522	4318
ACC	MMP9	DC	-0.20618	0.0720163	0.168751	4318
ACC	MMP9	Effector_memory	0.165107	0.151294	0.992918	4318
ACC	MMP9	Exhausted	0.202142	0.0778969	0.334836	4318
ACC	MMP9	Gamma_delta	0.338352	0.00261447	0.0108881	4318
ACC	MMP9	InfiltrationScore	-0.085519	0.459599	0.666156	4318
ACC	MMP9	MAIT	0.424673	0.000118394	0.00756428	4318
ACC	MMP9	Macrophage	-0.0790249	0.494501	0.688858	4318
ACC	MMP9	Monocyte	-0.125075	0.278437	0.991086	4318
ACC	MMP9	NK	0.111586	0.33396	0.527738	4318
ACC	MMP9	NKT	0.066019	0.568365	0.937318	4318
ACC	MMP9	Neutrophil	-0.380228	0.000647278	0.0134274	4318
ACC	MMP9	Tfh	0.155456	0.177005	0.416027	4318
ACC	MMP9	Th1	0.261503	0.0216031	0.092277	4318
ACC	MMP9	Th17	-0.227075	0.0470324	0.211112	4318
ACC	MMP9	Th2	0.316697	0.00501337	0.036956	4318
ACC	MMP9	Tr1	-0.142697	0.215706	0.77968	4318
ACC	MMP9	iTreg	0.102746	0.373896	0.560153	4318
ACC	MMP9	nTreg	0.312348	0.00568241	0.0767275	4318
ACC	SERPINE1	Bcell	-0.0418425	0.717861	0.887399	5054
ACC	SERPINE1	CD4_T	0.105668	0.360384	0.921928	5054
ACC	SERPINE1	CD4_naive	0.082205	0.477238	0.720494	5054
ACC	SERPINE1	CD8_T	0.0108916	0.925099	0.994007	5054
ACC	SERPINE1	CD8_naive	0.263532	0.0205713	0.0706592	5054
ACC	SERPINE1	Central_memory	0.118652	0.304057	0.69289	5054
ACC	SERPINE1	Cytotoxic	-0.0747014	0.518484	0.890729	5054
ACC	SERPINE1	DC	-0.0833651	0.471022	0.638878	5054
ACC	SERPINE1	Effector_memory	0.0257569	0.824037	0.992918	5054
ACC	SERPINE1	Exhausted	-0.0533666	0.644828	0.801063	5054
ACC	SERPINE1	Gamma_delta	0.296374	0.00886494	0.0279507	5054
ACC	SERPINE1	InfiltrationScore	-0.26869	0.018137	0.0620607	5054
ACC	SERPINE1	MAIT	0.06798	0.556905	0.769947	5054
ACC	SERPINE1	Macrophage	-0.18067	0.115854	0.230018	5054
ACC	SERPINE1	Monocyte	0.00343803	0.976326	0.992532	5054
ACC	SERPINE1	NK	-0.25861	0.0231493	0.118199	5054
ACC	SERPINE1	NKT	0.109753	0.34201	0.830142	5054
ACC	SERPINE1	Neutrophil	-0.031001	0.78897	0.93584	5054
ACC	SERPINE1	Tfh	-0.0828632	0.473706	0.688274	5054
ACC	SERPINE1	Th1	-0.116066	0.31479	0.564334	5054
ACC	SERPINE1	Th17	0.191957	0.0944351	0.309243	5054
ACC	SERPINE1	Th2	-0.0837083	0.469192	0.768529	5054
ACC	SERPINE1	Tr1	-0.179072	0.119167	0.729313	5054
ACC	SERPINE1	iTreg	-0.0628936	0.586854	0.709748	5054
ACC	SERPINE1	nTreg	-0.0979637	0.396656	0.68193	5054
ACC	SPP1	Bcell	0.115828	0.315791	0.713584	6696
ACC	SPP1	CD4_T	0.113777	0.324496	0.921928	6696
ACC	SPP1	CD4_naive	0.193582	0.0916241	0.281182	6696
ACC	SPP1	CD8_T	0.0948308	0.412001	0.710444	6696
ACC	SPP1	CD8_naive	0.349299	0.00184784	0.0129439	6696
ACC	SPP1	Central_memory	0.239328	0.0360545	0.47118	6696
ACC	SPP1	Cytotoxic	0.0362353	0.754383	0.952058	6696
ACC	SPP1	DC	-0.369589	0.000939494	0.0255431	6696
ACC	SPP1	Effector_memory	-0.132092	0.252138	0.992918	6696
ACC	SPP1	Exhausted	-0.200152	0.0809311	0.343727	6696
ACC	SPP1	Gamma_delta	0.416641	0.000163822	0.00193623	6696
ACC	SPP1	InfiltrationScore	-0.244167	0.0323535	0.0964601	6696
ACC	SPP1	MAIT	0.142396	0.216686	0.552972	6696
ACC	SPP1	Macrophage	-0.326413	0.00376485	0.0261485	6696
ACC	SPP1	Monocyte	-0.164346	0.153213	0.991086	6696
ACC	SPP1	NK	-0.0223774	0.846823	0.925357	6696
ACC	SPP1	NKT	-0.0225801	0.845453	0.998036	6696
ACC	SPP1	Neutrophil	-0.082254	0.476975	0.706573	6696
ACC	SPP1	Tfh	-0.0183336	0.874253	0.931856	6696
ACC	SPP1	Th1	-0.119876	0.299058	0.55342	6696
ACC	SPP1	Th17	0.0937338	0.417455	0.639251	6696
ACC	SPP1	Th2	-0.0262313	0.820849	0.935928	6696
ACC	SPP1	Tr1	0.0179745	0.876697	0.958804	6696
ACC	SPP1	iTreg	-0.28032	0.0135382	0.0516644	6696
ACC	SPP1	nTreg	-0.22453	0.0496274	0.209348	6696
ACC	TIMP2	Bcell	-0.325933	0.00381933	0.0262998	7077
ACC	TIMP2	CD4_T	0.19504	0.0891614	0.921928	7077
ACC	TIMP2	CD4_naive	-0.324558	0.00397928	0.0306011	7077
ACC	TIMP2	CD8_T	0.342922	0.00226525	0.0224187	7077
ACC	TIMP2	CD8_naive	-0.153181	0.183506	0.314607	7077
ACC	TIMP2	Central_memory	-0.141435	0.219835	0.63616	7077
ACC	TIMP2	Cytotoxic	0.343373	0.00223316	0.0194184	7077
ACC	TIMP2	DC	-0.098914	0.392069	0.566466	7077
ACC	TIMP2	Effector_memory	0.0102416	0.929557	0.992918	7077
ACC	TIMP2	Exhausted	0.139649	0.225773	0.553852	7077
ACC	TIMP2	Gamma_delta	0.0222352	0.847785	0.994939	7077
ACC	TIMP2	InfiltrationScore	0.212282	0.0638127	0.163054	7077
ACC	TIMP2	MAIT	0.244023	0.0324586	0.142596	7077
ACC	TIMP2	Macrophage	-0.00700036	0.951818	0.989173	7077
ACC	TIMP2	Monocyte	-0.023771	0.83741	0.991086	7077
ACC	TIMP2	NK	0.471946	1.4709e-05	0.0134956	7077
ACC	TIMP2	NKT	0.213262	0.0625684	0.409801	7077
ACC	TIMP2	Neutrophil	-0.352754	0.00165188	0.0189854	7077
ACC	TIMP2	Tfh	0.250481	0.0280084	0.142695	7077
ACC	TIMP2	Th1	0.35047	0.00177923	0.0153062	7077
ACC	TIMP2	Th17	-0.153117	0.183692	0.443446	7077
ACC	TIMP2	Th2	0.466476	1.9025e-05	0.00189909	7077
ACC	TIMP2	Tr1	-0.129231	0.262649	0.77968	7077
ACC	TIMP2	iTreg	0.346274	0.00203631	0.0167974	7077
ACC	TIMP2	nTreg	0.366312	0.00105108	0.0691234	7077
ACC	TNF	Bcell	0.080045	0.488928	0.832682	7124
ACC	TNF	CD4_T	-0.201445	0.0789488	0.911375	7124
ACC	TNF	CD4_naive	0.0216493	0.85175	0.957099	7124
ACC	TNF	CD8_T	-0.0867873	0.452943	0.737995	7124
ACC	TNF	CD8_naive	-0.0453183	0.695529	0.782435	7124
ACC	TNF	Central_memory	-0.274735	0.0156025	0.47118	7124
ACC	TNF	Cytotoxic	-0.0026163	0.981983	0.992063	7124
ACC	TNF	DC	0.135428	0.240251	0.408135	7124
ACC	TNF	Effector_memory	-0.0161108	0.889396	0.992918	7124
ACC	TNF	Exhausted	-0.0492545	0.670548	0.813607	7124
ACC	TNF	Gamma_delta	-0.106319	0.357416	0.552978	7124
ACC	TNF	InfiltrationScore	0.0488328	0.673208	0.826887	7124
ACC	TNF	MAIT	0.00512106	0.964743	0.981255	7124
ACC	TNF	Macrophage	0.0967046	0.402782	0.608633	7124
ACC	TNF	Monocyte	-0.0108871	0.925129	0.991086	7124
ACC	TNF	NK	0.0700481	0.54494	0.703543	7124
ACC	TNF	NKT	0.0468427	0.685814	0.990036	7124
ACC	TNF	Neutrophil	0.0185592	0.872719	0.959741	7124
ACC	TNF	Tfh	-0.170296	0.138677	0.352697	7124
ACC	TNF	Th1	-0.0778394	0.501019	0.691533	7124
ACC	TNF	Th17	0.207867	0.0696685	0.275298	7124
ACC	TNF	Th2	-0.0227961	0.843993	0.943543	7124
ACC	TNF	Tr1	0.1036	0.369915	0.787455	7124
ACC	TNF	iTreg	0.0619233	0.592649	0.711248	7124
ACC	TNF	nTreg	0.063257	0.58469	0.777718	7124
ACC	TNFRSF11B	Bcell	-0.0576128	0.618699	0.861664	4982
ACC	TNFRSF11B	CD4_T	0.142913	0.215006	0.921928	4982
ACC	TNFRSF11B	CD4_naive	-0.0711837	0.538423	0.775161	4982
ACC	TNFRSF11B	CD8_T	0.212691	0.063291	0.210001	4982
ACC	TNFRSF11B	CD8_naive	0.16898	0.141799	0.273136	4982
ACC	TNFRSF11B	Central_memory	0.0441128	0.703246	0.872269	4982
ACC	TNFRSF11B	Cytotoxic	0.210122	0.0666255	0.191078	4982
ACC	TNFRSF11B	DC	-0.279944	0.0136694	0.0606975	4982
ACC	TNFRSF11B	Effector_memory	0.0871019	0.451301	0.992918	4982
ACC	TNFRSF11B	Exhausted	0.0825244	0.475522	0.708328	4982
ACC	TNFRSF11B	Gamma_delta	-0.00152525	0.989496	0.998725	4982
ACC	TNFRSF11B	InfiltrationScore	-0.0731752	0.527089	0.722463	4982
ACC	TNFRSF11B	MAIT	0.106676	0.355797	0.615526	4982
ACC	TNFRSF11B	Macrophage	-0.281083	0.0132753	0.0527139	4982
ACC	TNFRSF11B	Monocyte	-0.0448584	0.698469	0.991086	4982
ACC	TNFRSF11B	NK	0.240829	0.0348701	0.156156	4982
ACC	TNFRSF11B	NKT	-0.0525014	0.650206	0.988959	4982
ACC	TNFRSF11B	Neutrophil	-0.289841	0.0105616	0.0644882	4982
ACC	TNFRSF11B	Tfh	0.214731	0.0607408	0.202703	4982
ACC	TNFRSF11B	Th1	0.169951	0.13949	0.350048	4982
ACC	TNFRSF11B	Th17	-0.301254	0.00775825	0.0599061	4982
ACC	TNFRSF11B	Th2	0.237888	0.0372217	0.149014	4982
ACC	TNFRSF11B	Tr1	-0.0901954	0.435327	0.806798	4982
ACC	TNFRSF11B	iTreg	0.18323	0.110696	0.24926	4982
ACC	TNFRSF11B	nTreg	0.259223	0.0228144	0.137486	4982
BLCA	FGF2	Bcell	-0.0142238	0.775626	0.912015	2247
BLCA	FGF2	CD4_T	0.00158442	0.974673	0.993395	2247
BLCA	FGF2	CD4_naive	0.0631145	0.205543	0.643939	2247
BLCA	FGF2	CD8_T	0.0384128	0.441313	0.853884	2247
BLCA	FGF2	CD8_naive	0.036198	0.468112	0.665526	2247
BLCA	FGF2	Central_memory	0.0255466	0.60867	0.988202	2247
BLCA	FGF2	Cytotoxic	-0.0380966	0.445084	0.571711	2247
BLCA	FGF2	DC	-0.104308	0.0361016	0.154568	2247
BLCA	FGF2	Effector_memory	-0.0205795	0.680042	0.923411	2247
BLCA	FGF2	Exhausted	-0.0689868	0.166368	0.339038	2247
BLCA	FGF2	Gamma_delta	0.021348	0.66879	0.892134	2247
BLCA	FGF2	InfiltrationScore	-0.111928	0.0244603	0.0986327	2247
BLCA	FGF2	MAIT	-0.00123004	0.980337	0.996974	2247
BLCA	FGF2	Macrophage	-0.142257	0.00416942	0.0324272	2247
BLCA	FGF2	Monocyte	-0.0561639	0.26005	0.787739	2247
BLCA	FGF2	NK	0.00835314	0.867072	0.925153	2247
BLCA	FGF2	NKT	-0.0368171	0.460531	0.643549	2247
BLCA	FGF2	Neutrophil	0.000993051	0.984125	0.992362	2247
BLCA	FGF2	Tfh	0.0328186	0.51068	0.754949	2247
BLCA	FGF2	Th1	-0.0286813	0.565413	0.761287	2247
BLCA	FGF2	Th17	-0.00407709	0.934889	0.960213	2247
BLCA	FGF2	Th2	0.00474076	0.92432	0.970253	2247
BLCA	FGF2	Tr1	-0.0428055	0.390833	0.710133	2247
BLCA	FGF2	iTreg	0.00157308	0.974854	0.992492	2247
BLCA	FGF2	nTreg	0.046241	0.353901	0.776124	2247
BLCA	ICAM1	Bcell	0.089642	0.0718884	0.328288	3383
BLCA	ICAM1	CD4_T	0.14002	0.0048091	0.0473494	3383
BLCA	ICAM1	CD4_naive	0.072885	0.143638	0.538029	3383
BLCA	ICAM1	CD8_T	0.0769657	0.12247	0.682043	3383
BLCA	ICAM1	CD8_naive	0.0283787	0.569524	0.751203	3383
BLCA	ICAM1	Central_memory	0.0563472	0.258496	0.988142	3383
BLCA	ICAM1	Cytotoxic	-0.0320861	0.520166	0.637461	3383
BLCA	ICAM1	DC	-0.121118	0.0148558	0.0902479	3383
BLCA	ICAM1	Effector_memory	-0.0780072	0.117476	0.420884	3383
BLCA	ICAM1	Exhausted	-0.152114	0.00217053	0.0248678	3383
BLCA	ICAM1	Gamma_delta	0.0961545	0.0534622	0.474337	3383
BLCA	ICAM1	InfiltrationScore	-0.0760943	0.126773	0.326096	3383
BLCA	ICAM1	MAIT	0.116226	0.0194497	0.102313	3383
BLCA	ICAM1	Macrophage	-0.0849847	0.0880143	0.257046	3383
BLCA	ICAM1	Monocyte	-0.14496	0.0034995	0.125925	3383
BLCA	ICAM1	NK	-0.0435368	0.382782	0.563037	3383
BLCA	ICAM1	NKT	-0.0800504	0.108145	0.289674	3383
BLCA	ICAM1	Neutrophil	0.0319611	0.521794	0.750565	3383
BLCA	ICAM1	Tfh	0.08504	0.087807	0.332788	3383
BLCA	ICAM1	Th1	-0.0949434	0.0565549	0.183827	3383
BLCA	ICAM1	Th17	-0.0414229	0.406332	0.603266	3383
BLCA	ICAM1	Th2	-0.106163	0.0329021	0.237808	3383
BLCA	ICAM1	Tr1	0.0854222	0.0863854	0.508805	3383
BLCA	ICAM1	iTreg	0.0460948	0.355426	0.639799	3383
BLCA	ICAM1	nTreg	0.0117002	0.814635	0.942786	3383
BLCA	ICAM3	Bcell	0.0943949	0.0580038	0.296257	3385
BLCA	ICAM3	CD4_T	0.13698	0.00582028	0.0537633	3385
BLCA	ICAM3	CD4_naive	0.0841851	0.0910552	0.428855	3385
BLCA	ICAM3	CD8_T	0.0680898	0.17196	0.705237	3385
BLCA	ICAM3	CD8_naive	0.0337555	0.49868	0.692844	3385
BLCA	ICAM3	Central_memory	0.0624103	0.210655	0.988142	3385
BLCA	ICAM3	Cytotoxic	-0.0410448	0.410633	0.540208	3385
BLCA	ICAM3	DC	-0.127456	0.0103365	0.0771713	3385
BLCA	ICAM3	Effector_memory	-0.0862592	0.0833366	0.360025	3385
BLCA	ICAM3	Exhausted	-0.160208	0.00123336	0.0161542	3385
BLCA	ICAM3	Gamma_delta	0.0915461	0.0660307	0.474337	3385
BLCA	ICAM3	InfiltrationScore	-0.0846727	0.0891912	0.257167	3385
BLCA	ICAM3	MAIT	0.117744	0.0179075	0.0977812	3385
BLCA	ICAM3	Macrophage	-0.090502	0.0691924	0.220991	3385
BLCA	ICAM3	Monocyte	-0.149915	0.00251939	0.11691	3385
BLCA	ICAM3	NK	-0.0500802	0.315325	0.499978	3385
BLCA	ICAM3	NKT	-0.083189	0.0949604	0.267206	3385
BLCA	ICAM3	Neutrophil	0.0398562	0.424329	0.673071	3385
BLCA	ICAM3	Tfh	0.080999	0.104016	0.365024	3385
BLCA	ICAM3	Th1	-0.102069	0.0403103	0.150359	3385
BLCA	ICAM3	Th17	-0.0345367	0.48879	0.659157	3385
BLCA	ICAM3	Th2	-0.113647	0.0223362	0.194736	3385
BLCA	ICAM3	Tr1	0.0777781	0.118561	0.509987	3385
BLCA	ICAM3	iTreg	0.0405827	0.415926	0.683216	3385
BLCA	ICAM3	nTreg	0.0133291	0.789397	0.931002	3385
BLCA	ITGA2	Bcell	-0.0963332	0.0530178	0.283193	3673
BLCA	ITGA2	CD4_T	0.00623681	0.900546	0.982433	3673
BLCA	ITGA2	CD4_naive	0.0034034	0.94563	0.999172	3673
BLCA	ITGA2	CD8_T	0.0373169	0.454462	0.860557	3673
BLCA	ITGA2	CD8_naive	-0.00633627	0.898969	0.951912	3673
BLCA	ITGA2	Central_memory	-0.109345	0.0279778	0.988142	3673
BLCA	ITGA2	Cytotoxic	0.087595	0.0786516	0.189569	3673
BLCA	ITGA2	DC	0.0525199	0.292298	0.525155	3673
BLCA	ITGA2	Effector_memory	0.0691187	0.165557	0.484602	3673
BLCA	ITGA2	Exhausted	0.0363171	0.466649	0.656584	3673
BLCA	ITGA2	Gamma_delta	0.117024	0.0186253	0.474337	3673
BLCA	ITGA2	InfiltrationScore	0.0456586	0.360002	0.60009	3673
BLCA	ITGA2	MAIT	0.119979	0.015831	0.0917368	3673
BLCA	ITGA2	Macrophage	0.0684064	0.16997	0.382024	3673
BLCA	ITGA2	Monocyte	0.00776052	0.876424	0.97475	3673
BLCA	ITGA2	NK	0.0492072	0.323846	0.509042	3673
BLCA	ITGA2	NKT	0.0456482	0.360112	0.565011	3673
BLCA	ITGA2	Neutrophil	-0.0717563	0.14996	0.376189	3673
BLCA	ITGA2	Tfh	0.0407258	0.414282	0.678959	3673
BLCA	ITGA2	Th1	0.0610148	0.221057	0.443264	3673
BLCA	ITGA2	Th17	-0.181915	0.000237077	0.00424426	3673
BLCA	ITGA2	Th2	-0.00104129	0.983354	0.993949	3673
BLCA	ITGA2	Tr1	-0.00463709	0.92597	0.966879	3673
BLCA	ITGA2	iTreg	0.0951054	0.0561327	0.235203	3673
BLCA	ITGA2	nTreg	0.0850405	0.0878051	0.751687	3673
BLCA	LCP1	Bcell	0.0426818	0.392205	0.709336	3936
BLCA	LCP1	CD4_T	0.205078	3.2746e-05	0.00363663	3936
BLCA	LCP1	CD4_naive	0.0975921	0.0499748	0.333086	3936
BLCA	LCP1	CD8_T	-0.0481013	0.334852	0.819329	3936
BLCA	LCP1	CD8_naive	0.075914	0.127678	0.303327	3936
BLCA	LCP1	Central_memory	0.0588773	0.237691	0.988142	3936
BLCA	LCP1	Cytotoxic	-0.0857602	0.0851438	0.198686	3936
BLCA	LCP1	DC	-0.0670766	0.178444	0.390078	3936
BLCA	LCP1	Effector_memory	-0.159389	0.00130748	0.0663786	3936
BLCA	LCP1	Exhausted	-0.136477	0.00600468	0.045732	3936
BLCA	LCP1	Gamma_delta	0.0247576	0.619785	0.876822	3936
BLCA	LCP1	InfiltrationScore	0.00217917	0.965171	0.987063	3936
BLCA	LCP1	MAIT	0.0267052	0.592511	0.836422	3936
BLCA	LCP1	Macrophage	-0.0396816	0.426362	0.671736	3936
BLCA	LCP1	Monocyte	0.0867302	0.0816597	0.660455	3936
BLCA	LCP1	NK	-0.0457188	0.359369	0.54083	3936
BLCA	LCP1	NKT	0.0953509	0.0554982	0.191279	3936
BLCA	LCP1	Neutrophil	0.0162128	0.745268	0.871793	3936
BLCA	LCP1	Tfh	0.0808823	0.104517	0.36597	3936
BLCA	LCP1	Th1	-0.148502	0.00276962	0.0231938	3936
BLCA	LCP1	Th17	0.0225467	0.651387	0.781172	3936
BLCA	LCP1	Th2	-0.00451381	0.927933	0.971398	3936
BLCA	LCP1	Tr1	0.0271951	0.585738	0.812677	3936
BLCA	LCP1	iTreg	-0.0797033	0.109688	0.360841	3936
BLCA	LCP1	nTreg	-0.112504	0.0237299	0.573286	3936
BLCA	MMP1	Bcell	0.0395378	0.428042	0.740952	4312
BLCA	MMP1	CD4_T	-0.01785	0.720569	0.916379	4312
BLCA	MMP1	CD4_naive	-0.0366082	0.463082	0.886533	4312
BLCA	MMP1	CD8_T	0.0805062	0.106145	0.664574	4312
BLCA	MMP1	CD8_naive	-0.0684172	0.169903	0.365194	4312
BLCA	MMP1	Central_memory	-0.0152353	0.760141	0.988202	4312
BLCA	MMP1	Cytotoxic	0.128614	0.00965766	0.0445105	4312
BLCA	MMP1	DC	0.0467331	0.348797	0.587981	4312
BLCA	MMP1	Effector_memory	0.0529653	0.28822	0.634967	4312
BLCA	MMP1	Exhausted	0.122151	0.0140181	0.0762197	4312
BLCA	MMP1	Gamma_delta	0.0164354	0.741894	0.908112	4312
BLCA	MMP1	InfiltrationScore	0.172737	0.000487641	0.00637994	4312
BLCA	MMP1	MAIT	-0.0845332	0.0897211	0.282544	4312
BLCA	MMP1	Macrophage	0.109465	0.0278053	0.114376	4312
BLCA	MMP1	Monocyte	0.0409308	0.411935	0.828824	4312
BLCA	MMP1	NK	0.163529	0.000970483	0.0129528	4312
BLCA	MMP1	NKT	0.0917771	0.0653476	0.209842	4312
BLCA	MMP1	Neutrophil	-0.133573	0.0071769	0.06718	4312
BLCA	MMP1	Tfh	0.0646738	0.194542	0.483274	4312
BLCA	MMP1	Th1	0.111075	0.0255765	0.112	4312
BLCA	MMP1	Th17	-0.11373	0.0222377	0.111759	4312
BLCA	MMP1	Th2	0.138089	0.00543108	0.0917748	4312
BLCA	MMP1	Tr1	0.0965608	0.0524566	0.508805	4312
BLCA	MMP1	iTreg	0.0625338	0.209752	0.493701	4312
BLCA	MMP1	nTreg	-0.027968	0.575126	0.844025	4312
BLCA	MMP10	Bcell	0.0398373	0.424548	0.737499	4319
BLCA	MMP10	CD4_T	-0.0179383	0.719245	0.915432	4319
BLCA	MMP10	CD4_naive	-0.0364874	0.46456	0.886675	4319
BLCA	MMP10	CD8_T	0.0803686	0.106746	0.665815	4319
BLCA	MMP10	CD8_naive	-0.0688532	0.167191	0.361584	4319
BLCA	MMP10	Central_memory	-0.015023	0.763384	0.988202	4319
BLCA	MMP10	Cytotoxic	0.129038	0.00941879	0.0436586	4319
BLCA	MMP10	DC	0.0465784	0.350396	0.589516	4319
BLCA	MMP10	Effector_memory	0.0529011	0.288805	0.635711	4319
BLCA	MMP10	Exhausted	0.122511	0.0137357	0.0753933	4319
BLCA	MMP10	Gamma_delta	0.0157856	0.751757	0.911605	4319
BLCA	MMP10	InfiltrationScore	0.173164	0.000471901	0.00619471	4319
BLCA	MMP10	MAIT	-0.0845996	0.0894687	0.282128	4319
BLCA	MMP10	Macrophage	0.109821	0.0272993	0.112554	4319
BLCA	MMP10	Monocyte	0.0411903	0.408974	0.828172	4319
BLCA	MMP10	NK	0.163944	0.00094154	0.0126175	4319
BLCA	MMP10	NKT	0.0918972	0.0649947	0.20916	4319
BLCA	MMP10	Neutrophil	-0.133729	0.00710905	0.0668153	4319
BLCA	MMP10	Tfh	0.0646292	0.194851	0.483752	4319
BLCA	MMP10	Th1	0.111456	0.0250725	0.110842	4319
BLCA	MMP10	Th17	-0.113919	0.0220153	0.110988	4319
BLCA	MMP10	Th2	0.138327	0.0053508	0.0907361	4319
BLCA	MMP10	Tr1	0.0962282	0.0532784	0.508805	4319
BLCA	MMP10	iTreg	0.0629736	0.206558	0.490857	4319
BLCA	MMP10	nTreg	-0.0275797	0.580447	0.845623	4319
BLCA	MMP12	Bcell	0.0390462	0.433812	0.744044	4321
BLCA	MMP12	CD4_T	-0.0152563	0.759822	0.936636	4321
BLCA	MMP12	CD4_naive	-0.0296877	0.551845	0.927073	4321
BLCA	MMP12	CD8_T	0.0685338	0.169175	0.700949	4321
BLCA	MMP12	CD8_naive	-0.0561023	0.260574	0.470949	4321
BLCA	MMP12	Central_memory	-0.0154239	0.757264	0.988202	4321
BLCA	MMP12	Cytotoxic	0.11742	0.0182275	0.0725027	4321
BLCA	MMP12	DC	0.0377446	0.449303	0.677931	4321
BLCA	MMP12	Effector_memory	0.0531287	0.286732	0.633198	4321
BLCA	MMP12	Exhausted	0.107126	0.0313401	0.124211	4321
BLCA	MMP12	Gamma_delta	0.00740063	0.882112	0.957984	4321
BLCA	MMP12	InfiltrationScore	0.160099	0.00124298	0.0135742	4321
BLCA	MMP12	MAIT	-0.0724227	0.146203	0.382325	4321
BLCA	MMP12	Macrophage	0.094754	0.0570517	0.194833	4321
BLCA	MMP12	Monocyte	0.0387349	0.437489	0.831614	4321
BLCA	MMP12	NK	0.158295	0.00141303	0.0182895	4321
BLCA	MMP12	NKT	0.085828	0.0848962	0.249447	4321
BLCA	MMP12	Neutrophil	-0.119005	0.016708	0.128519	4321
BLCA	MMP12	Tfh	0.0544755	0.274674	0.5601	4321
BLCA	MMP12	Th1	0.100485	0.0435312	0.158016	4321
BLCA	MMP12	Th17	-0.114124	0.0217762	0.110071	4321
BLCA	MMP12	Th2	0.136404	0.00603206	0.094655	4321
BLCA	MMP12	Tr1	0.0897298	0.0716091	0.508805	4321
BLCA	MMP12	iTreg	0.0605236	0.224804	0.510943	4321
BLCA	MMP12	nTreg	-0.0260101	0.602183	0.856031	4321
BLCA	MMP13	Bcell	0.0435784	0.382327	0.699844	4322
BLCA	MMP13	CD4_T	-0.0219654	0.659804	0.879866	4322
BLCA	MMP13	CD4_naive	-0.016723	0.737542	0.961555	4322
BLCA	MMP13	CD8_T	0.0604084	0.225689	0.759844	4322
BLCA	MMP13	CD8_naive	-0.0463867	0.352385	0.56245	4322
BLCA	MMP13	Central_memory	-0.0245714	0.622421	0.988202	4322
BLCA	MMP13	Cytotoxic	0.108138	0.0297666	0.100321	4322
BLCA	MMP13	DC	0.0294057	0.555631	0.759544	4322
BLCA	MMP13	Effector_memory	0.0421156	0.398522	0.740159	4322
BLCA	MMP13	Exhausted	0.0964199	0.0528035	0.168694	4322
BLCA	MMP13	Gamma_delta	0.0169586	0.733983	0.905574	4322
BLCA	MMP13	InfiltrationScore	0.150358	0.00244529	0.0214729	4322
BLCA	MMP13	MAIT	-0.0727766	0.144236	0.379629	4322
BLCA	MMP13	Macrophage	0.0867407	0.0816227	0.244614	4322
BLCA	MMP13	Monocyte	0.0393744	0.429954	0.831614	4322
BLCA	MMP13	NK	0.149673	0.00256062	0.0307725	4322
BLCA	MMP13	NKT	0.088088	0.0769773	0.234059	4322
BLCA	MMP13	Neutrophil	-0.10681	0.0318461	0.184975	4322
BLCA	MMP13	Tfh	0.042757	0.391371	0.663083	4322
BLCA	MMP13	Th1	0.0882936	0.0762876	0.221893	4322
BLCA	MMP13	Th17	-0.101774	0.0408935	0.176041	4322
BLCA	MMP13	Th2	0.124064	0.0125753	0.147697	4322
BLCA	MMP13	Tr1	0.0802467	0.10728	0.508967	4322
BLCA	MMP13	iTreg	0.0481915	0.333946	0.615913	4322
BLCA	MMP13	nTreg	-0.0379485	0.446856	0.793961	4322
BLCA	MMP14	Bcell	0.0396513	0.426716	0.739987	4323
BLCA	MMP14	CD4_T	-0.083588	0.0933805	0.292075	4323
BLCA	MMP14	CD4_naive	-0.069812	0.161344	0.571498	4323
BLCA	MMP14	CD8_T	0.0169489	0.734129	0.944405	4323
BLCA	MMP14	CD8_naive	0.018318	0.713561	0.850361	4323
BLCA	MMP14	Central_memory	0.0718946	0.149174	0.988142	4323
BLCA	MMP14	Cytotoxic	0.0921229	0.0643358	0.164393	4323
BLCA	MMP14	DC	0.0121573	0.807532	0.921114	4323
BLCA	MMP14	Effector_memory	0.0428209	0.390663	0.733753	4323
BLCA	MMP14	Exhausted	-0.00669505	0.893281	0.940874	4323
BLCA	MMP14	Gamma_delta	-0.0431659	0.386852	0.752436	4323
BLCA	MMP14	InfiltrationScore	0.0309303	0.535315	0.746899	4323
BLCA	MMP14	MAIT	0.102095	0.0402591	0.159294	4323
BLCA	MMP14	Macrophage	0.0619929	0.213729	0.435095	4323
BLCA	MMP14	Monocyte	-0.0758444	0.128028	0.710433	4323
BLCA	MMP14	NK	0.0570572	0.252535	0.440226	4323
BLCA	MMP14	NKT	0.0323551	0.516672	0.688763	4323
BLCA	MMP14	Neutrophil	-0.080849	0.104661	0.312039	4323
BLCA	MMP14	Tfh	0.00632365	0.899169	0.957805	4323
BLCA	MMP14	Th1	0.0670211	0.178804	0.394519	4323
BLCA	MMP14	Th17	-0.0395251	0.42819	0.619699	4323
BLCA	MMP14	Th2	0.0427782	0.391136	0.662906	4323
BLCA	MMP14	Tr1	0.0624499	0.210366	0.57699	4323
BLCA	MMP14	iTreg	0.0184519	0.711561	0.886432	4323
BLCA	MMP14	nTreg	-0.0202886	0.68432	0.893849	4323
BLCA	MMP2	Bcell	-0.0395153	0.428305	0.74108	4313
BLCA	MMP2	CD4_T	0.159185	0.00132667	0.0218935	4313
BLCA	MMP2	CD4_naive	0.0199826	0.688832	0.95481	4313
BLCA	MMP2	CD8_T	0.0261749	0.599882	0.903339	4313
BLCA	MMP2	CD8_naive	0.0457335	0.359214	0.568616	4313
BLCA	MMP2	Central_memory	0.02324	0.641406	0.988202	4313
BLCA	MMP2	Cytotoxic	-0.00723808	0.884684	0.925915	4313
BLCA	MMP2	DC	-0.0293853	0.555906	0.759744	4313
BLCA	MMP2	Effector_memory	0.00910389	0.855251	0.973859	4313
BLCA	MMP2	Exhausted	0.00173752	0.972227	0.985613	4313
BLCA	MMP2	Gamma_delta	0.0703027	0.158412	0.538819	4313
BLCA	MMP2	InfiltrationScore	0.00883646	0.859458	0.936754	4313
BLCA	MMP2	MAIT	0.0449118	0.367922	0.662621	4313
BLCA	MMP2	Macrophage	-0.0549593	0.270428	0.507456	4313
BLCA	MMP2	Monocyte	0.0748828	0.132949	0.710433	4313
BLCA	MMP2	NK	0.0292595	0.557598	0.71445	4313
BLCA	MMP2	NKT	0.081494	0.101912	0.279594	4313
BLCA	MMP2	Neutrophil	-0.0648714	0.19318	0.431709	4313
BLCA	MMP2	Tfh	0.0667413	0.180629	0.470437	4313
BLCA	MMP2	Th1	-0.0411781	0.409113	0.627838	4313
BLCA	MMP2	Th17	-0.0894625	0.072462	0.257418	4313
BLCA	MMP2	Th2	0.0934308	0.0606245	0.307191	4313
BLCA	MMP2	Tr1	0.0306704	0.538751	0.790542	4313
BLCA	MMP2	iTreg	-0.0642607	0.197414	0.480731	4313
BLCA	MMP2	nTreg	-0.142395	0.00413246	0.523756	4313
BLCA	MMP3	Bcell	0.0390462	0.433812	0.744044	4314
BLCA	MMP3	CD4_T	-0.0152563	0.759822	0.936636	4314
BLCA	MMP3	CD4_naive	-0.0296877	0.551845	0.927073	4314
BLCA	MMP3	CD8_T	0.0685338	0.169175	0.700949	4314
BLCA	MMP3	CD8_naive	-0.0561023	0.260574	0.470949	4314
BLCA	MMP3	Central_memory	-0.0154239	0.757264	0.988202	4314
BLCA	MMP3	Cytotoxic	0.11742	0.0182275	0.0725027	4314
BLCA	MMP3	DC	0.0377446	0.449303	0.677931	4314
BLCA	MMP3	Effector_memory	0.0531287	0.286732	0.633198	4314
BLCA	MMP3	Exhausted	0.107126	0.0313401	0.124211	4314
BLCA	MMP3	Gamma_delta	0.00740063	0.882112	0.957984	4314
BLCA	MMP3	InfiltrationScore	0.160099	0.00124298	0.0135742	4314
BLCA	MMP3	MAIT	-0.0724227	0.146203	0.382325	4314
BLCA	MMP3	Macrophage	0.094754	0.0570517	0.194833	4314
BLCA	MMP3	Monocyte	0.0387349	0.437489	0.831614	4314
BLCA	MMP3	NK	0.158295	0.00141303	0.0182895	4314
BLCA	MMP3	NKT	0.085828	0.0848962	0.249447	4314
BLCA	MMP3	Neutrophil	-0.119005	0.016708	0.128519	4314
BLCA	MMP3	Tfh	0.0544755	0.274674	0.5601	4314
BLCA	MMP3	Th1	0.100485	0.0435312	0.158016	4314
BLCA	MMP3	Th17	-0.114124	0.0217762	0.110071	4314
BLCA	MMP3	Th2	0.136404	0.00603206	0.094655	4314
BLCA	MMP3	Tr1	0.0897298	0.0716091	0.508805	4314
BLCA	MMP3	iTreg	0.0605236	0.224804	0.510943	4314
BLCA	MMP3	nTreg	-0.0260101	0.602183	0.856031	4314
BLCA	MMP9	Bcell	0.0763461	0.125517	0.429575	4318
BLCA	MMP9	CD4_T	-0.0464982	0.351228	0.641749	4318
BLCA	MMP9	CD4_naive	-0.0142058	0.775902	0.968172	4318
BLCA	MMP9	CD8_T	-0.0216751	0.664023	0.921247	4318
BLCA	MMP9	CD8_naive	0.0813137	0.102674	0.266269	4318
BLCA	MMP9	Central_memory	-0.0473176	0.342795	0.988142	4318
BLCA	MMP9	Cytotoxic	-0.101117	0.0422203	0.128974	4318
BLCA	MMP9	DC	-0.01464	0.769244	0.897442	4318
BLCA	MMP9	Effector_memory	0.063231	0.204706	0.5358	4318
BLCA	MMP9	Exhausted	0.00124629	0.980077	0.989618	4318
BLCA	MMP9	Gamma_delta	0.0147931	0.766899	0.916427	4318
BLCA	MMP9	InfiltrationScore	-0.0344787	0.48952	0.707221	4318
BLCA	MMP9	MAIT	-0.14433	0.00364629	0.0413884	4318
BLCA	MMP9	Macrophage	-0.0201669	0.686114	0.841632	4318
BLCA	MMP9	Monocyte	-0.00260991	0.958293	0.993583	4318
BLCA	MMP9	NK	-0.0823409	0.0983896	0.254302	4318
BLCA	MMP9	NKT	-0.0837216	0.0928562	0.262916	4318
BLCA	MMP9	Neutrophil	0.0866825	0.0818282	0.275942	4318
BLCA	MMP9	Tfh	-0.0433519	0.384808	0.656436	4318
BLCA	MMP9	Th1	-0.00978773	0.844512	0.933563	4318
BLCA	MMP9	Th17	0.0795439	0.110402	0.332895	4318
BLCA	MMP9	Th2	-0.0835569	0.0935027	0.376256	4318
BLCA	MMP9	Tr1	-0.0250934	0.615043	0.827875	4318
BLCA	MMP9	iTreg	-0.0413819	0.406796	0.675644	4318
BLCA	MMP9	nTreg	0.057281	0.250676	0.751687	4318
BLCA	SERPINE1	Bcell	0.115149	0.0206125	0.185224	5054
BLCA	SERPINE1	CD4_T	0.0358298	0.472653	0.755527	5054
BLCA	SERPINE1	CD4_naive	0.00470571	0.924878	0.999172	5054
BLCA	SERPINE1	CD8_T	-0.0147223	0.767984	0.9545	5054
BLCA	SERPINE1	CD8_naive	0.0488299	0.327575	0.537743	5054
BLCA	SERPINE1	Central_memory	0.0591552	0.23548	0.988142	5054
BLCA	SERPINE1	Cytotoxic	-0.0946822	0.0572411	0.154509	5054
BLCA	SERPINE1	DC	-0.0647446	0.194054	0.408897	5054
BLCA	SERPINE1	Effector_memory	-0.0045554	0.927271	0.984899	5054
BLCA	SERPINE1	Exhausted	-0.024744	0.619977	0.759216	5054
BLCA	SERPINE1	Gamma_delta	0.0229117	0.646124	0.885149	5054
BLCA	SERPINE1	InfiltrationScore	0.00594814	0.905127	0.961363	5054
BLCA	SERPINE1	MAIT	-0.00287949	0.953989	0.993544	5054
BLCA	SERPINE1	Macrophage	0.00318144	0.949171	0.981208	5054
BLCA	SERPINE1	Monocyte	-0.04392	0.378605	0.822604	5054
BLCA	SERPINE1	NK	-0.0142009	0.775977	0.86816	5054
BLCA	SERPINE1	NKT	-0.120363	0.0154959	0.0909233	5054
BLCA	SERPINE1	Neutrophil	0.0247255	0.620238	0.804335	5054
BLCA	SERPINE1	Tfh	0.0292263	0.558046	0.78657	5054
BLCA	SERPINE1	Th1	-0.0625811	0.209407	0.430502	5054
BLCA	SERPINE1	Th17	-0.0503853	0.312382	0.535771	5054
BLCA	SERPINE1	Th2	-0.0432719	0.385687	0.659285	5054
BLCA	SERPINE1	Tr1	0.0843336	0.0904844	0.508805	5054
BLCA	SERPINE1	iTreg	-0.0339652	0.496015	0.752824	5054
BLCA	SERPINE1	nTreg	-0.0278818	0.576305	0.844737	5054
BLCA	SPP1	Bcell	0.0182704	0.714273	0.887764	6696
BLCA	SPP1	CD4_T	0.0107012	0.830211	0.968938	6696
BLCA	SPP1	CD4_naive	0.0982182	0.0485164	0.328124	6696
BLCA	SPP1	CD8_T	-0.00247041	0.96052	0.99074	6696
BLCA	SPP1	CD8_naive	0.075839	0.128056	0.304131	6696
BLCA	SPP1	Central_memory	0.0114327	0.818799	0.989717	6696
BLCA	SPP1	Cytotoxic	-0.0961967	0.0533568	0.147132	6696
BLCA	SPP1	DC	-0.106704	0.032017	0.144935	6696
BLCA	SPP1	Effector_memory	0.0198668	0.690543	0.92984	6696
BLCA	SPP1	Exhausted	-0.0885841	0.075322	0.210768	6696
BLCA	SPP1	Gamma_delta	-0.00711097	0.886695	0.960248	6696
BLCA	SPP1	InfiltrationScore	-0.174024	0.000441661	0.00590498	6696
BLCA	SPP1	MAIT	0.062046	0.213336	0.491481	6696
BLCA	SPP1	Macrophage	-0.221402	7.04875e-06	0.000140914	6696
BLCA	SPP1	Monocyte	-0.101595	0.0412515	0.539676	6696
BLCA	SPP1	NK	-0.0384097	0.441349	0.616301	6696
BLCA	SPP1	NKT	-0.102098	0.0402528	0.156505	6696
BLCA	SPP1	Neutrophil	0.0695933	0.162664	0.391919	6696
BLCA	SPP1	Tfh	-0.0209791	0.674183	0.861349	6696
BLCA	SPP1	Th1	-0.0505922	0.310397	0.534185	6696
BLCA	SPP1	Th17	0.0366279	0.462841	0.643631	6696
BLCA	SPP1	Th2	-0.0576337	0.247765	0.570974	6696
BLCA	SPP1	Tr1	-0.0741764	0.136656	0.518414	6696
BLCA	SPP1	iTreg	-0.0847199	0.0890124	0.316686	6696
BLCA	SPP1	nTreg	0.0308276	0.536671	0.825675	6696
BLCA	TIMP2	Bcell	0.0221211	0.657545	0.873111	7077
BLCA	TIMP2	CD4_T	-0.064057	0.198841	0.469101	7077
BLCA	TIMP2	CD4_naive	0.107398	0.0309105	0.243183	7077
BLCA	TIMP2	CD8_T	-0.0936246	0.06009	0.663296	7077
BLCA	TIMP2	CD8_naive	0.12159	0.0144674	0.0872341	7077
BLCA	TIMP2	Central_memory	-0.0145022	0.771355	0.988202	7077
BLCA	TIMP2	Cytotoxic	-0.187492	0.000150318	0.00175599	7077
BLCA	TIMP2	DC	-0.0272436	0.58507	0.780046	7077
BLCA	TIMP2	Effector_memory	0.0315129	0.527651	0.829827	7077
BLCA	TIMP2	Exhausted	-0.0919974	0.0647015	0.190816	7077
BLCA	TIMP2	Gamma_delta	-0.0987386	0.0473315	0.474337	7077
BLCA	TIMP2	InfiltrationScore	-0.141747	0.00430803	0.0315685	7077
BLCA	TIMP2	MAIT	-0.0488152	0.32772	0.627414	7077
BLCA	TIMP2	Macrophage	-0.118732	0.0169618	0.0823934	7077
BLCA	TIMP2	Monocyte	0.0193912	0.697582	0.936692	7077
BLCA	TIMP2	NK	-0.153618	0.00195815	0.024522	7077
BLCA	TIMP2	NKT	-0.168285	0.000683133	0.0420282	7077
BLCA	TIMP2	Neutrophil	0.174426	0.000428147	0.00745711	7077
BLCA	TIMP2	Tfh	-0.215164	1.2855e-05	0.00301431	7077
BLCA	TIMP2	Th1	-0.110982	0.0257019	0.112485	7077
BLCA	TIMP2	Th17	0.195468	7.6567e-05	0.00195473	7077
BLCA	TIMP2	Th2	-0.125168	0.0118034	0.143071	7077
BLCA	TIMP2	Tr1	-0.0580685	0.24421	0.605987	7077
BLCA	TIMP2	iTreg	-0.097463	0.05028	0.220201	7077
BLCA	TIMP2	nTreg	0.0398708	0.424158	0.786213	7077
BLCA	TNF	Bcell	-0.0387652	0.43713	0.744044	7124
BLCA	TNF	CD4_T	-0.165184	0.000859801	0.0164928	7124
BLCA	TNF	CD4_naive	-0.0225202	0.65177	0.947256	7124
BLCA	TNF	CD8_T	0.0426563	0.392488	0.829409	7124
BLCA	TNF	CD8_naive	-0.10804	0.0299156	0.129233	7124
BLCA	TNF	Central_memory	-0.0577951	0.246441	0.988142	7124
BLCA	TNF	Cytotoxic	0.0935372	0.0603308	0.158953	7124
BLCA	TNF	DC	0.0842678	0.0907368	0.254177	7124
BLCA	TNF	Effector_memory	0.0416565	0.403688	0.740159	7124
BLCA	TNF	Exhausted	0.146011	0.00326668	0.0314086	7124
BLCA	TNF	Gamma_delta	-0.0185502	0.710094	0.899514	7124
BLCA	TNF	InfiltrationScore	0.0293972	0.555745	0.756242	7124
BLCA	TNF	MAIT	-0.00795599	0.873338	0.975012	7124
BLCA	TNF	Macrophage	0.0346106	0.487859	0.72085	7124
BLCA	TNF	Monocyte	-0.0553468	0.267059	0.787747	7124
BLCA	TNF	NK	0.0706683	0.156253	0.327931	7124
BLCA	TNF	NKT	-0.0169805	0.733653	0.842655	7124
BLCA	TNF	Neutrophil	-0.04126	0.408181	0.660886	7124
BLCA	TNF	Tfh	-0.0720276	0.148422	0.429658	7124
BLCA	TNF	Th1	0.0954579	0.0552233	0.181032	7124
BLCA	TNF	Th17	0.034299	0.491788	0.659157	7124
BLCA	TNF	Th2	-0.0146142	0.769639	0.890667	7124
BLCA	TNF	Tr1	-0.0768368	0.123099	0.509987	7124
BLCA	TNF	iTreg	0.00571218	0.908874	0.972242	7124
BLCA	TNF	nTreg	0.0238088	0.633265	0.867892	7124
BLCA	TNFRSF11B	Bcell	0.0600302	0.228613	0.556553	4982
BLCA	TNFRSF11B	CD4_T	-0.127011	0.0106083	0.0731982	4982
BLCA	TNFRSF11B	CD4_naive	-0.0153182	0.758877	0.963466	4982
BLCA	TNFRSF11B	CD8_T	-0.0424289	0.395019	0.83024	4982
BLCA	TNFRSF11B	CD8_naive	0.111481	0.0250393	0.118127	4982
BLCA	TNFRSF11B	Central_memory	-0.0347868	0.485646	0.988202	4982
BLCA	TNFRSF11B	Cytotoxic	-0.115162	0.0205988	0.0786783	4982
BLCA	TNFRSF11B	DC	0.0397826	0.425185	0.657916	4982
BLCA	TNFRSF11B	Effector_memory	0.155752	0.00168918	0.0666889	4982
BLCA	TNFRSF11B	Exhausted	-0.0497748	0.318289	0.520223	4982
BLCA	TNFRSF11B	Gamma_delta	-0.0910584	0.0674924	0.474337	4982
BLCA	TNFRSF11B	InfiltrationScore	-0.0836843	0.0930023	0.261569	4982
BLCA	TNFRSF11B	MAIT	-0.0645219	0.195595	0.462668	4982
BLCA	TNFRSF11B	Macrophage	-0.0345728	0.488335	0.721266	4982
BLCA	TNFRSF11B	Monocyte	-0.0066829	0.893474	0.976719	4982
BLCA	TNFRSF11B	NK	-0.118143	0.0175197	0.107181	4982
BLCA	TNFRSF11B	NKT	-0.136044	0.0061677	0.0646392	4982
BLCA	TNFRSF11B	Neutrophil	0.0931666	0.0613596	0.253492	4982
BLCA	TNFRSF11B	Tfh	-0.100202	0.0441299	0.226928	4982
BLCA	TNFRSF11B	Th1	0.0231825	0.642232	0.81146	4982
BLCA	TNFRSF11B	Th17	-0.0974146	0.0503947	0.202376	4982
BLCA	TNFRSF11B	Th2	-0.0906368	0.0687775	0.323338	4982
BLCA	TNFRSF11B	Tr1	0.0530014	0.287891	0.639972	4982
BLCA	TNFRSF11B	iTreg	0.0630178	0.206239	0.49042	4982
BLCA	TNFRSF11B	nTreg	0.134787	0.00666394	0.523756	4982
BRCA	FGF2	Bcell	-0.129341	2.0477e-05	6.6598e-05	2247
BRCA	FGF2	CD4_T	-0.0219438	0.471692	0.581352	2247
BRCA	FGF2	CD4_naive	0.001773	0.953633	0.987901	2247
BRCA	FGF2	CD8_T	-0.029721	0.329605	0.461263	2247
BRCA	FGF2	CD8_naive	0.102853	0.00071958	0.00145425	2247
BRCA	FGF2	Central_memory	0.0191992	0.528896	0.752734	2247
BRCA	FGF2	Cytotoxic	-0.0519623	0.0881488	0.153634	2247
BRCA	FGF2	DC	-0.0893124	0.00333707	0.00900342	2247
BRCA	FGF2	Effector_memory	-0.0803325	0.00832106	0.028692	2247
BRCA	FGF2	Exhausted	-0.0808561	0.00790708	0.0189563	2247
BRCA	FGF2	Gamma_delta	0.0088296	0.772145	0.815884	2247
BRCA	FGF2	InfiltrationScore	-0.0594286	0.0510957	0.0966902	2247
BRCA	FGF2	MAIT	0.0301958	0.321934	0.470424	2247
BRCA	FGF2	Macrophage	0.0230937	0.448777	0.597629	2247
BRCA	FGF2	Monocyte	0.000184984	0.99516	0.997602	2247
BRCA	FGF2	NK	0.00585857	0.847638	0.888108	2247
BRCA	FGF2	NKT	-0.044392	0.145242	0.211725	2247
BRCA	FGF2	Neutrophil	0.0604594	0.0471921	0.117554	2247
BRCA	FGF2	Tfh	-0.00502243	0.869172	0.906114	2247
BRCA	FGF2	Th1	-0.0836023	0.00602293	0.0193084	2247
BRCA	FGF2	Th17	0.0427996	0.160245	0.232818	2247
BRCA	FGF2	Th2	0.0259674	0.394358	0.533674	2247
BRCA	FGF2	Tr1	0.0402011	0.187195	0.499231	2247
BRCA	FGF2	iTreg	-0.053805	0.0774288	0.144408	2247
BRCA	FGF2	nTreg	-0.022236	0.465809	0.636846	2247
BRCA	ICAM1	Bcell	-0.04062	0.182639	0.234716	3383
BRCA	ICAM1	CD4_T	0.144805	1.80569e-06	1.0011e-05	3383
BRCA	ICAM1	CD4_naive	0.00673088	0.825294	0.979845	3383
BRCA	ICAM1	CD8_T	0.0638755	0.036	0.124912	3383
BRCA	ICAM1	CD8_naive	-0.10402	0.000624843	0.00128875	3383
BRCA	ICAM1	Central_memory	0.0153793	0.613986	0.810447	3383
BRCA	ICAM1	Cytotoxic	0.05796	0.0571207	0.107563	3383
BRCA	ICAM1	DC	-0.0555375	0.0683412	0.116522	3383
BRCA	ICAM1	Effector_memory	-0.045158	0.138419	0.247514	3383
BRCA	ICAM1	Exhausted	-0.0133369	0.661821	0.750464	3383
BRCA	ICAM1	Gamma_delta	0.119692	8.1674e-05	0.000623882	3383
BRCA	ICAM1	InfiltrationScore	0.045583	0.134742	0.202139	3383
BRCA	ICAM1	MAIT	-0.0100368	0.742032	0.823728	3383
BRCA	ICAM1	Macrophage	-0.07272	0.0169403	0.0607864	3383
BRCA	ICAM1	Monocyte	-0.0555238	0.0684096	0.178757	3383
BRCA	ICAM1	NK	0.105722	0.000507255	0.00160944	3383
BRCA	ICAM1	NKT	0.111534	0.000243311	0.00106446	3383
BRCA	ICAM1	Neutrophil	-0.042099	0.167205	0.320715	3383
BRCA	ICAM1	Tfh	0.0928075	0.00228698	0.0067027	3383
BRCA	ICAM1	Th1	-0.01103	0.717547	0.815651	3383
BRCA	ICAM1	Th17	-0.00744038	0.807224	0.861848	3383
BRCA	ICAM1	Th2	0.0810622	0.00774927	0.0403939	3383
BRCA	ICAM1	Tr1	-0.0810593	0.00775146	0.0641013	3383
BRCA	ICAM1	iTreg	-0.0457344	0.13345	0.223885	3383
BRCA	ICAM1	nTreg	-0.050917	0.0947419	0.229464	3383
BRCA	ICAM3	Bcell	-0.0427407	0.160821	0.210467	3385
BRCA	ICAM3	CD4_T	0.14478	1.81304e-06	1.0042e-05	3385
BRCA	ICAM3	CD4_naive	0.00661152	0.828344	0.979845	3385
BRCA	ICAM3	CD8_T	0.0669148	0.028026	0.108528	3385
BRCA	ICAM3	CD8_naive	-0.106552	0.000457731	0.000970156	3385
BRCA	ICAM3	Central_memory	0.0200846	0.510064	0.740968	3385
BRCA	ICAM3	Cytotoxic	0.058729	0.0538959	0.102366	3385
BRCA	ICAM3	DC	-0.0525116	0.0848348	0.140191	3385
BRCA	ICAM3	Effector_memory	-0.0430938	0.157388	0.272954	3385
BRCA	ICAM3	Exhausted	-0.0182939	0.548509	0.658245	3385
BRCA	ICAM3	Gamma_delta	0.12084	6.9638e-05	0.000566762	3385
BRCA	ICAM3	InfiltrationScore	0.0516403	0.090139	0.148869	3385
BRCA	ICAM3	MAIT	-0.00875171	0.7741	0.845529	3385
BRCA	ICAM3	Macrophage	-0.0677257	0.026175	0.0849963	3385
BRCA	ICAM3	Monocyte	-0.0542165	0.0751859	0.190769	3385
BRCA	ICAM3	NK	0.106442	0.000464021	0.00149046	3385
BRCA	ICAM3	NKT	0.106627	0.000453519	0.00181204	3385
BRCA	ICAM3	Neutrophil	-0.0436348	0.152236	0.301277	3385
BRCA	ICAM3	Tfh	0.0953958	0.00171479	0.00519764	3385
BRCA	ICAM3	Th1	-0.00746076	0.806706	0.877873	3385
BRCA	ICAM3	Th17	-0.00950269	0.75531	0.820819	3385
BRCA	ICAM3	Th2	0.0877411	0.0039389	0.026301	3385
BRCA	ICAM3	Tr1	-0.0754751	0.0131851	0.0927248	3385
BRCA	ICAM3	iTreg	-0.0416179	0.172114	0.275082	3385
BRCA	ICAM3	nTreg	-0.044893	0.140751	0.300921	3385
BRCA	ITGA2	Bcell	-0.240205	1.29786e-15	3.79035e-14	3673
BRCA	ITGA2	CD4_T	0.00785726	0.796653	0.865709	3673
BRCA	ITGA2	CD4_naive	-0.0390704	0.199915	0.979845	3673
BRCA	ITGA2	CD8_T	-0.0483116	0.112899	0.243506	3673
BRCA	ITGA2	CD8_naive	0.212939	1.61249e-12	1.56578e-11	3673
BRCA	ITGA2	Central_memory	-0.0217324	0.475973	0.715831	3673
BRCA	ITGA2	Cytotoxic	-0.102251	0.0007735	0.00266627	3673
BRCA	ITGA2	DC	-0.0223986	0.462553	0.545362	3673
BRCA	ITGA2	Effector_memory	0.0318184	0.296604	0.445901	3673
BRCA	ITGA2	Exhausted	-0.13662	6.74551e-06	3.6268e-05	3673
BRCA	ITGA2	Gamma_delta	0.0378462	0.214383	0.31973	3673
BRCA	ITGA2	InfiltrationScore	-0.0504122	0.0980642	0.15844	3673
BRCA	ITGA2	MAIT	0.0545881	0.0732065	0.180357	3673
BRCA	ITGA2	Macrophage	0.12373	4.6341e-05	0.00112504	3673
BRCA	ITGA2	Monocyte	0.0255039	0.402856	0.631305	3673
BRCA	ITGA2	NK	-0.0476139	0.1182	0.183624	3673
BRCA	ITGA2	NKT	-0.0531484	0.0811199	0.133194	3673
BRCA	ITGA2	Neutrophil	0.0189642	0.533954	0.68137	3673
BRCA	ITGA2	Tfh	-0.0551686	0.0701992	0.121581	3673
BRCA	ITGA2	Th1	-0.120481	7.3208e-05	0.000386866	3673
BRCA	ITGA2	Th17	0.186552	6.73501e-10	3.91507e-09	3673
BRCA	ITGA2	Th2	-0.0606659	0.0464413	0.130094	3673
BRCA	ITGA2	Tr1	0.00248011	0.935176	0.978628	3673
BRCA	ITGA2	iTreg	-0.089006	0.00344742	0.0108488	3673
BRCA	ITGA2	nTreg	-0.0608997	0.0456029	0.147565	3673
BRCA	LCP1	Bcell	-0.0921316	0.00246274	0.00512812	3936
BRCA	LCP1	CD4_T	0.156356	2.47685e-07	1.77257e-06	3936
BRCA	LCP1	CD4_naive	0.0548855	0.0716529	0.979845	3936
BRCA	LCP1	CD8_T	-0.0122365	0.688194	0.767758	3936
BRCA	LCP1	CD8_naive	-0.0805037	0.00818365	0.0135603	3936
BRCA	LCP1	Central_memory	0.0680618	0.0254392	0.0994101	3936
BRCA	LCP1	Cytotoxic	0.0218765	0.473052	0.574463	3936
BRCA	LCP1	DC	-0.0363278	0.233357	0.321321	3936
BRCA	LCP1	Effector_memory	-0.0438491	0.150231	0.263225	3936
BRCA	LCP1	Exhausted	0.0110952	0.71595	0.791811	3936
BRCA	LCP1	Gamma_delta	0.0763488	0.0121587	0.0374076	3936
BRCA	LCP1	InfiltrationScore	0.00951106	0.755101	0.809487	3936
BRCA	LCP1	MAIT	0.00235157	0.938529	0.963908	3936
BRCA	LCP1	Macrophage	0.00668876	0.82637	0.901006	3936
BRCA	LCP1	Monocyte	0.0149679	0.6235	0.809309	3936
BRCA	LCP1	NK	0.0492515	0.106056	0.168655	3936
BRCA	LCP1	NKT	0.126421	3.1454e-05	0.00019668	3936
BRCA	LCP1	Neutrophil	-0.080412	0.00825704	0.0254173	3936
BRCA	LCP1	Tfh	0.0867603	0.00436281	0.0117407	3936
BRCA	LCP1	Th1	-0.0203882	0.503688	0.64281	3936
BRCA	LCP1	Th17	0.095109	0.00177099	0.00428708	3936
BRCA	LCP1	Th2	-0.0117795	0.69926	0.794239	3936
BRCA	LCP1	Tr1	-0.0237365	0.436248	0.750807	3936
BRCA	LCP1	iTreg	-0.0591344	0.0522581	0.102888	3936
BRCA	LCP1	nTreg	-0.0551021	0.0705387	0.188958	3936
BRCA	MMP1	Bcell	0.0703524	0.020885	0.0348989	4312
BRCA	MMP1	CD4_T	0.123046	5.1067e-05	0.000184907	4312
BRCA	MMP1	CD4_naive	0.0193786	0.525053	0.979845	4312
BRCA	MMP1	CD8_T	0.0228237	0.4541	0.575841	4312
BRCA	MMP1	CD8_naive	-0.228662	2.96514e-14	3.84654e-13	4312
BRCA	MMP1	Central_memory	0.0561143	0.0655177	0.20413	4312
BRCA	MMP1	Cytotoxic	0.129829	1.9043e-05	0.000132273	4312
BRCA	MMP1	DC	0.000121213	0.996828	0.99782	4312
BRCA	MMP1	Effector_memory	-0.0660071	0.0302306	0.0807058	4312
BRCA	MMP1	Exhausted	0.108825	0.000344213	0.0012228	4312
BRCA	MMP1	Gamma_delta	0.0598406	0.0495042	0.105607	4312
BRCA	MMP1	InfiltrationScore	0.0810234	0.00777878	0.0230553	4312
BRCA	MMP1	MAIT	-0.115252	0.000149257	0.00364168	4312
BRCA	MMP1	Macrophage	-0.010638	0.727179	0.829985	4312
BRCA	MMP1	Monocyte	-0.0216095	0.478473	0.70352	4312
BRCA	MMP1	NK	0.116245	0.000130659	0.000507754	4312
BRCA	MMP1	NKT	0.0770765	0.0113584	0.0272615	4312
BRCA	MMP1	Neutrophil	-0.115886	0.000137111	0.000658921	4312
BRCA	MMP1	Tfh	0.0764156	0.0120832	0.0281908	4312
BRCA	MMP1	Th1	0.0838	0.00590429	0.0189754	4312
BRCA	MMP1	Th17	-0.0199955	0.511944	0.613188	4312
BRCA	MMP1	Th2	0.0432311	0.156068	0.288988	4312
BRCA	MMP1	Tr1	0.0317541	0.297582	0.639703	4312
BRCA	MMP1	iTreg	0.0718152	0.0183632	0.0421788	4312
BRCA	MMP1	nTreg	0.112564	0.000212821	0.00600792	4312
BRCA	MMP10	Bcell	0.0703524	0.020885	0.0348989	4319
BRCA	MMP10	CD4_T	0.123049	5.1049e-05	0.00018487	4319
BRCA	MMP10	CD4_naive	0.0193786	0.525053	0.979845	4319
BRCA	MMP10	CD8_T	0.022826	0.454055	0.575841	4319
BRCA	MMP10	CD8_naive	-0.228666	2.96211e-14	3.84476e-13	4319
BRCA	MMP10	Central_memory	0.0561184	0.0654978	0.20413	4319
BRCA	MMP10	Cytotoxic	0.129822	1.9064e-05	0.000132379	4319
BRCA	MMP10	DC	0.000114383	0.997007	0.997854	4319
BRCA	MMP10	Effector_memory	-0.0660149	0.0302111	0.0806788	4319
BRCA	MMP10	Exhausted	0.108811	0.000344818	0.00122476	4319
BRCA	MMP10	Gamma_delta	0.0598442	0.0494907	0.105592	4319
BRCA	MMP10	InfiltrationScore	0.0810163	0.00778417	0.0230683	4319
BRCA	MMP10	MAIT	-0.115242	0.000149454	0.00364264	4319
BRCA	MMP10	Macrophage	-0.010648	0.726933	0.829745	4319
BRCA	MMP10	Monocyte	-0.0216046	0.478572	0.703576	4319
BRCA	MMP10	NK	0.116241	0.000130729	0.000507867	4319
BRCA	MMP10	NKT	0.0770805	0.0113541	0.0272541	4319
BRCA	MMP10	Neutrophil	-0.115883	0.000137175	0.00065909	4319
BRCA	MMP10	Tfh	0.0764189	0.0120794	0.0281849	4319
BRCA	MMP10	Th1	0.0837888	0.00591097	0.0189916	4319
BRCA	MMP10	Th17	-0.0199908	0.512043	0.613227	4319
BRCA	MMP10	Th2	0.0432377	0.156005	0.288903	4319
BRCA	MMP10	Tr1	0.0317502	0.297642	0.639703	4319
BRCA	MMP10	iTreg	0.0718067	0.0183771	0.0422024	4319
BRCA	MMP10	nTreg	0.112558	0.000212986	0.00600792	4319
BRCA	MMP12	Bcell	0.0648893	0.0331487	0.0525805	4321
BRCA	MMP12	CD4_T	0.125848	3.4182e-05	0.000132925	4321
BRCA	MMP12	CD4_naive	0.0200313	0.511188	0.979845	4321
BRCA	MMP12	CD8_T	0.0195582	0.521218	0.633184	4321
BRCA	MMP12	CD8_naive	-0.225382	6.99851e-14	8.30983e-13	4321
BRCA	MMP12	Central_memory	0.0553877	0.069091	0.212651	4321
BRCA	MMP12	Cytotoxic	0.129091	2.1251e-05	0.000144144	4321
BRCA	MMP12	DC	0.00058098	0.984799	0.989116	4321
BRCA	MMP12	Effector_memory	-0.0656844	0.0310497	0.0825113	4321
BRCA	MMP12	Exhausted	0.110118	0.000291977	0.0010632	4321
BRCA	MMP12	Gamma_delta	0.0638944	0.0359449	0.0830907	4321
BRCA	MMP12	InfiltrationScore	0.0805437	0.00815186	0.0239128	4321
BRCA	MMP12	MAIT	-0.115538	0.000143651	0.00355743	4321
BRCA	MMP12	Macrophage	-0.00882891	0.772162	0.862969	4321
BRCA	MMP12	Monocyte	-0.0219129	0.472316	0.697008	4321
BRCA	MMP12	NK	0.117759	0.000106467	0.000426423	4321
BRCA	MMP12	NKT	0.072894	0.016678	0.0368658	4321
BRCA	MMP12	Neutrophil	-0.115438	0.000145598	0.000694795	4321
BRCA	MMP12	Tfh	0.0751361	0.0136037	0.0313118	4321
BRCA	MMP12	Th1	0.0799997	0.00859421	0.0260495	4321
BRCA	MMP12	Th17	-0.0180825	0.553141	0.6513	4321
BRCA	MMP12	Th2	0.0448574	0.141067	0.270913	4321
BRCA	MMP12	Tr1	0.0299497	0.325896	0.664684	4321
BRCA	MMP12	iTreg	0.0707509	0.0201697	0.0457378	4321
BRCA	MMP12	nTreg	0.107215	0.000421439	0.00815426	4321
BRCA	MMP13	Bcell	0.064842	0.0332772	0.0527337	4322
BRCA	MMP13	CD4_T	0.125967	3.3596e-05	0.000130931	4322
BRCA	MMP13	CD4_naive	0.0200313	0.511188	0.979845	4322
BRCA	MMP13	CD8_T	0.0196941	0.518326	0.630996	4322
BRCA	MMP13	CD8_naive	-0.22528	7.18665e-14	8.51574e-13	4322
BRCA	MMP13	Central_memory	0.0555707	0.0681764	0.210621	4322
BRCA	MMP13	Cytotoxic	0.129219	2.0853e-05	0.000142031	4322
BRCA	MMP13	DC	0.000407869	0.989328	0.992366	4322
BRCA	MMP13	Effector_memory	-0.0656277	0.0311954	0.0828035	4322
BRCA	MMP13	Exhausted	0.110316	0.000284658	0.00104064	4322
BRCA	MMP13	Gamma_delta	0.0640163	0.035592	0.0825058	4322
BRCA	MMP13	InfiltrationScore	0.0804853	0.00819829	0.0240313	4322
BRCA	MMP13	MAIT	-0.115408	0.000146177	0.00360296	4322
BRCA	MMP13	Macrophage	-0.00895374	0.769031	0.860806	4322
BRCA	MMP13	Monocyte	-0.0220884	0.468774	0.69398	4322
BRCA	MMP13	NK	0.117972	0.000103415	0.000416138	4322
BRCA	MMP13	NKT	0.0729357	0.0166157	0.0367455	4322
BRCA	MMP13	Neutrophil	-0.115618	0.00014213	0.000680355	4322
BRCA	MMP13	Tfh	0.0753191	0.0133763	0.03085	4322
BRCA	MMP13	Th1	0.0801421	0.0084764	0.0257871	4322
BRCA	MMP13	Th17	-0.0181043	0.552662	0.650836	4322
BRCA	MMP13	Th2	0.0446841	0.14261	0.272767	4322
BRCA	MMP13	Tr1	0.0298608	0.327333	0.664684	4322
BRCA	MMP13	iTreg	0.0706203	0.0204017	0.0462005	4322
BRCA	MMP13	nTreg	0.107053	0.000430052	0.00826171	4322
BRCA	MMP14	Bcell	-0.082259	0.0068872	0.0131069	4323
BRCA	MMP14	CD4_T	-0.0561712	0.0652444	0.114621	4323
BRCA	MMP14	CD4_naive	0.0097598	0.748909	0.979845	4323
BRCA	MMP14	CD8_T	-0.0180386	0.554105	0.662143	4323
BRCA	MMP14	CD8_naive	0.19432	1.24207e-10	8.74821e-10	4323
BRCA	MMP14	Central_memory	0.0311539	0.306812	0.565464	4323
BRCA	MMP14	Cytotoxic	-0.0675669	0.026529	0.0544565	4323
BRCA	MMP14	DC	-0.0508484	0.0951883	0.154571	4323
BRCA	MMP14	Effector_memory	0.0538534	0.0771618	0.162799	4323
BRCA	MMP14	Exhausted	-0.0758013	0.0127933	0.0287217	4323
BRCA	MMP14	Gamma_delta	0.0834646	0.00610679	0.0218619	4323
BRCA	MMP14	InfiltrationScore	-0.130318	1.7701e-05	0.000145339	4323
BRCA	MMP14	MAIT	0.0755877	0.0130488	0.0573254	4323
BRCA	MMP14	Macrophage	0.0293466	0.335736	0.481944	4323
BRCA	MMP14	Monocyte	-0.0573646	0.0597258	0.161858	4323
BRCA	MMP14	NK	-0.0650304	0.0327676	0.0641593	4323
BRCA	MMP14	NKT	-0.0287813	0.345133	0.429282	4323
BRCA	MMP14	Neutrophil	-0.0171325	0.574185	0.71074	4323
BRCA	MMP14	Tfh	-0.0280529	0.357483	0.470877	4323
BRCA	MMP14	Th1	-0.021059	0.489752	0.63193	4323
BRCA	MMP14	Th17	0.0965616	0.00150281	0.00369355	4323
BRCA	MMP14	Th2	-0.0742956	0.014692	0.0608462	4323
BRCA	MMP14	Tr1	-0.0272348	0.371682	0.703972	4323
BRCA	MMP14	iTreg	-0.0673863	0.0269366	0.0584359	4323
BRCA	MMP14	nTreg	-0.0981341	0.00125499	0.0150269	4323
BRCA	MMP2	Bcell	0.125447	3.6222e-05	0.000112534	4313
BRCA	MMP2	CD4_T	0.0557652	0.0672149	0.117645	4313
BRCA	MMP2	CD4_naive	0.00209557	0.945209	0.983861	4313
BRCA	MMP2	CD8_T	0.02565	0.400166	0.529479	4313
BRCA	MMP2	CD8_naive	-0.149446	8.27529e-07	2.83608e-06	4313
BRCA	MMP2	Central_memory	0.105026	0.000552584	0.00619848	4313
BRCA	MMP2	Cytotoxic	0.203	1.72568e-11	5.57471e-10	4313
BRCA	MMP2	DC	0.132285	1.3161e-05	0.000107222	4313
BRCA	MMP2	Effector_memory	0.0445678	0.143653	0.254263	4313
BRCA	MMP2	Exhausted	0.201816	2.27116e-11	4.01007e-10	4313
BRCA	MMP2	Gamma_delta	-0.0873595	0.00409916	0.0156846	4313
BRCA	MMP2	InfiltrationScore	0.175593	6.48701e-09	2.10737e-07	4313
BRCA	MMP2	MAIT	-0.0395135	0.194857	0.338921	4313
BRCA	MMP2	Macrophage	0.049027	0.10766	0.22446	4313
BRCA	MMP2	Monocyte	0.0151187	0.620005	0.80651	4313
BRCA	MMP2	NK	0.141498	3.10299e-06	2.1989e-05	4313
BRCA	MMP2	NKT	-0.0688128	0.0238597	0.0490779	4313
BRCA	MMP2	Neutrophil	-0.156579	2.38029e-07	2.9254e-06	4313
BRCA	MMP2	Tfh	0.0889377	0.00347246	0.00960742	4313
BRCA	MMP2	Th1	0.185302	8.78169e-10	1.49904e-08	4313
BRCA	MMP2	Th17	-0.24689	1.96246e-16	3.00607e-15	4313
BRCA	MMP2	Th2	0.0603489	0.0475985	0.132112	4313
BRCA	MMP2	Tr1	0.130818	1.6423e-05	0.000250236	4313
BRCA	MMP2	iTreg	0.194922	1.0861e-10	6.28038e-09	4313
BRCA	MMP2	nTreg	0.0202423	0.506747	0.668229	4313
BRCA	MMP3	Bcell	0.0650393	0.0327437	0.0520308	4314
BRCA	MMP3	CD4_T	0.125821	3.4317e-05	0.000133338	4314
BRCA	MMP3	CD4_naive	0.0200313	0.511188	0.979845	4314
BRCA	MMP3	CD8_T	0.0197317	0.517528	0.630295	4314
BRCA	MMP3	CD8_naive	-0.225568	6.66819e-14	7.94208e-13	4314
BRCA	MMP3	Central_memory	0.0552378	0.0698478	0.213984	4314
BRCA	MMP3	Cytotoxic	0.129259	2.0728e-05	0.000141315	4314
BRCA	MMP3	DC	0.000579431	0.984839	0.989116	4314
BRCA	MMP3	Effector_memory	-0.06572	0.0309583	0.0823158	4314
BRCA	MMP3	Exhausted	0.110297	0.000285348	0.001043	4314
BRCA	MMP3	Gamma_delta	0.0641128	0.0353144	0.0819775	4314
BRCA	MMP3	InfiltrationScore	0.08073	0.00800506	0.0235665	4314
BRCA	MMP3	MAIT	-0.115395	0.000146424	0.00360296	4314
BRCA	MMP3	Macrophage	-0.00872687	0.774724	0.864652	4314
BRCA	MMP3	Monocyte	-0.0220587	0.469374	0.694336	4314
BRCA	MMP3	NK	0.11794	0.000103863	0.000417798	4314
BRCA	MMP3	NKT	0.0729604	0.0165789	0.0366851	4314
BRCA	MMP3	Neutrophil	-0.115614	0.000142196	0.000680531	4314
BRCA	MMP3	Tfh	0.0753145	0.013382	0.0308569	4314
BRCA	MMP3	Th1	0.0801467	0.00847256	0.0257822	4314
BRCA	MMP3	Th17	-0.0182453	0.549573	0.648453	4314
BRCA	MMP3	Th2	0.0447567	0.141962	0.271932	4314
BRCA	MMP3	Tr1	0.0298705	0.327176	0.664684	4314
BRCA	MMP3	iTreg	0.0705994	0.0204391	0.0462669	4314
BRCA	MMP3	nTreg	0.107002	0.000432809	0.0083009	4314
BRCA	MMP9	Bcell	0.0683873	0.024744	0.0405073	4318
BRCA	MMP9	CD4_T	-0.170328	1.83308e-08	1.64065e-07	4318
BRCA	MMP9	CD4_naive	-0.0644903	0.0342471	0.838153	4318
BRCA	MMP9	CD8_T	-0.0431299	0.15704	0.289429	4318
BRCA	MMP9	CD8_naive	0.184337	1.07648e-09	5.82571e-09	4318
BRCA	MMP9	Central_memory	-0.0452146	0.137924	0.342553	4318
BRCA	MMP9	Cytotoxic	-0.0103141	0.735169	0.805211	4318
BRCA	MMP9	DC	0.144974	1.75595e-06	2.0136e-05	4318
BRCA	MMP9	Effector_memory	0.10344	0.000670398	0.00389229	4318
BRCA	MMP9	Exhausted	0.0615942	0.0431875	0.0818927	4318
BRCA	MMP9	Gamma_delta	-0.111815	0.000234605	0.00149125	4318
BRCA	MMP9	InfiltrationScore	0.0623233	0.0407692	0.0814054	4318
BRCA	MMP9	MAIT	-0.0267615	0.380054	0.526417	4318
BRCA	MMP9	Macrophage	0.134902	8.81356e-06	0.000456699	4318
BRCA	MMP9	Monocyte	0.116411	0.00012777	0.0025543	4318
BRCA	MMP9	NK	-0.106112	0.000483425	0.00154677	4318
BRCA	MMP9	NKT	-0.157273	2.10198e-07	3.05203e-06	4318
BRCA	MMP9	Neutrophil	0.0655636	0.0313608	0.0823823	4318
BRCA	MMP9	Tfh	-0.122892	5.2197e-05	0.000244028	4318
BRCA	MMP9	Th1	0.0336887	0.269104	0.403368	4318
BRCA	MMP9	Th17	-0.0463982	0.127899	0.192673	4318
BRCA	MMP9	Th2	-0.0975327	0.00134494	0.0146064	4318
BRCA	MMP9	Tr1	0.0665311	0.0289406	0.167706	4318
BRCA	MMP9	iTreg	0.0955825	0.0016791	0.00610845	4318
BRCA	MMP9	nTreg	0.0594102	0.0511679	0.158189	4318
BRCA	SERPINE1	Bcell	0.104469	0.0005916	0.00138921	5054
BRCA	SERPINE1	CD4_T	0.0393045	0.19723	0.282403	5054
BRCA	SERPINE1	CD4_naive	-0.035719	0.241289	0.979845	5054
BRCA	SERPINE1	CD8_T	0.0472384	0.121132	0.253509	5054
BRCA	SERPINE1	CD8_naive	-0.105055	0.000550653	0.00114966	5054
BRCA	SERPINE1	Central_memory	-0.0205147	0.501044	0.734191	5054
BRCA	SERPINE1	Cytotoxic	0.0317235	0.298049	0.404546	5054
BRCA	SERPINE1	DC	0.00653215	0.830373	0.861912	5054
BRCA	SERPINE1	Effector_memory	0.000613019	0.983961	0.990306	5054
BRCA	SERPINE1	Exhausted	0.0260786	0.392336	0.51485	5054
BRCA	SERPINE1	Gamma_delta	0.0296501	0.330761	0.436303	5054
BRCA	SERPINE1	InfiltrationScore	0.056665	0.0629122	0.113472	5054
BRCA	SERPINE1	MAIT	-0.0643177	0.0347316	0.111575	5054
BRCA	SERPINE1	Macrophage	-0.0565693	0.0633583	0.161444	5054
BRCA	SERPINE1	Monocyte	-0.0203467	0.504557	0.726043	5054
BRCA	SERPINE1	NK	0.0426944	0.161276	0.236995	5054
BRCA	SERPINE1	NKT	0.0409703	0.178891	0.249187	5054
BRCA	SERPINE1	Neutrophil	0.0012003	0.9686	0.980084	5054
BRCA	SERPINE1	Tfh	0.019769	0.516737	0.62853	5054
BRCA	SERPINE1	Th1	0.0230285	0.450059	0.593721	5054
BRCA	SERPINE1	Th17	-0.0355192	0.243932	0.33086	5054
BRCA	SERPINE1	Th2	0.0413378	0.175021	0.312316	5054
BRCA	SERPINE1	Tr1	-0.0620737	0.041584	0.211161	5054
BRCA	SERPINE1	iTreg	-0.0105777	0.728665	0.81123	5054
BRCA	SERPINE1	nTreg	-0.058971	0.0529133	0.161335	5054
BRCA	SPP1	Bcell	-0.103979	0.000627979	0.00146808	6696
BRCA	SPP1	CD4_T	0.0272468	0.371472	0.479606	6696
BRCA	SPP1	CD4_naive	-0.000616745	0.983863	0.993824	6696
BRCA	SPP1	CD8_T	-0.00355004	0.907317	0.932266	6696
BRCA	SPP1	CD8_naive	0.0759893	0.0125722	0.0201688	6696
BRCA	SPP1	Central_memory	0.0465907	0.126323	0.322571	6696
BRCA	SPP1	Cytotoxic	-0.0180392	0.55409	0.647651	6696
BRCA	SPP1	DC	-0.107987	0.000382583	0.00149051	6696
BRCA	SPP1	Effector_memory	-0.0584414	0.0550837	0.127078	6696
BRCA	SPP1	Exhausted	-0.0844377	0.00553588	0.0142288	6696
BRCA	SPP1	Gamma_delta	0.013594	0.655716	0.718496	6696
BRCA	SPP1	InfiltrationScore	-0.0281651	0.355563	0.440447	6696
BRCA	SPP1	MAIT	0.0426448	0.161763	0.302864	6696
BRCA	SPP1	Macrophage	-0.00524162	0.863517	0.923443	6696
BRCA	SPP1	Monocyte	-0.0323993	0.287869	0.502848	6696
BRCA	SPP1	NK	0.0406267	0.182566	0.261666	6696
BRCA	SPP1	NKT	-0.053893	0.0769443	0.12778	6696
BRCA	SPP1	Neutrophil	0.0379002	0.21373	0.379486	6696
BRCA	SPP1	Tfh	0.029269	0.337017	0.450469	6696
BRCA	SPP1	Th1	-0.0828532	0.00649201	0.0206179	6696
BRCA	SPP1	Th17	0.0116878	0.701487	0.778794	6696
BRCA	SPP1	Th2	0.0469881	0.123118	0.249232	6696
BRCA	SPP1	Tr1	0.0537474	0.0777467	0.30269	6696
BRCA	SPP1	iTreg	-0.0403496	0.185571	0.292129	6696
BRCA	SPP1	nTreg	-0.021222	0.486397	0.651968	6696
BRCA	TIMP2	Bcell	0.0631335	0.0382169	0.0592108	7077
BRCA	TIMP2	CD4_T	-0.197064	6.72022e-11	9.70279e-10	7077
BRCA	TIMP2	CD4_naive	0.0119849	0.694278	0.979845	7077
BRCA	TIMP2	CD8_T	-0.0793567	0.00914464	0.0583813	7077
BRCA	TIMP2	CD8_naive	0.0320135	0.293651	0.346185	7077
BRCA	TIMP2	Central_memory	-0.101004	0.000897291	0.00850586	7077
BRCA	TIMP2	Cytotoxic	-0.057321	0.0599202	0.112078	7077
BRCA	TIMP2	DC	0.12006	7.7617e-05	0.000445698	7077
BRCA	TIMP2	Effector_memory	0.0688012	0.0238834	0.0668852	7077
BRCA	TIMP2	Exhausted	0.0240506	0.4302	0.550848	7077
BRCA	TIMP2	Gamma_delta	-0.16506	5.02151e-08	1.97673e-06	7077
BRCA	TIMP2	InfiltrationScore	0.0639943	0.0356553	0.0738787	7077
BRCA	TIMP2	MAIT	-0.0135947	0.655701	0.760981	7077
BRCA	TIMP2	Macrophage	0.0946307	0.00186848	0.01176	7077
BRCA	TIMP2	Monocyte	0.13489	8.82969e-06	0.000325727	7077
BRCA	TIMP2	NK	-0.0707195	0.0202253	0.0424859	7077
BRCA	TIMP2	NKT	-0.136503	6.87048e-06	5.5506e-05	7077
BRCA	TIMP2	Neutrophil	0.10951	0.000315526	0.00139091	7077
BRCA	TIMP2	Tfh	-0.145913	1.50196e-06	1.2749e-05	7077
BRCA	TIMP2	Th1	0.0245927	0.419877	0.564174	7077
BRCA	TIMP2	Th17	-0.104693	0.000575639	0.00153038	7077
BRCA	TIMP2	Th2	0.040301	0.186101	0.325675	7077
BRCA	TIMP2	Tr1	0.0590277	0.0526852	0.240404	7077
BRCA	TIMP2	iTreg	0.0375163	0.218408	0.332204	7077
BRCA	TIMP2	nTreg	0.0436765	0.151844	0.317987	7077
BRCA	TNF	Bcell	0.204106	1.33356e-11	1.82213e-10	7124
BRCA	TNF	CD4_T	-0.0460998	0.130372	0.201333	7124
BRCA	TNF	CD4_naive	-0.0149345	0.624274	0.979845	7124
BRCA	TNF	CD8_T	0.010984	0.718676	0.788468	7124
BRCA	TNF	CD8_naive	-0.134121	9.94149e-06	2.7731e-05	7124
BRCA	TNF	Central_memory	-0.02986	0.327347	0.580646	7124
BRCA	TNF	Cytotoxic	0.0469119	0.123727	0.199655	7124
BRCA	TNF	DC	0.113467	0.000189061	0.000858122	7124
BRCA	TNF	Effector_memory	0.0549455	0.0713425	0.153317	7124
BRCA	TNF	Exhausted	0.0852005	0.0051225	0.0133653	7124
BRCA	TNF	Gamma_delta	-0.0660741	0.030063	0.0736218	7124
BRCA	TNF	InfiltrationScore	0.076862	0.0115893	0.0309681	7124
BRCA	TNF	MAIT	-0.147007	1.25084e-06	0.000216614	7124
BRCA	TNF	Macrophage	-0.00430936	0.887613	0.934671	7124
BRCA	TNF	Monocyte	0.0144403	0.63579	0.814051	7124
BRCA	TNF	NK	-0.025239	0.40776	0.500398	7124
BRCA	TNF	NKT	0.0118587	0.697336	0.747977	7124
BRCA	TNF	Neutrophil	0.0221625	0.467284	0.631399	7124
BRCA	TNF	Tfh	-0.0286982	0.346527	0.459164	7124
BRCA	TNF	Th1	0.108154	0.000374641	0.00165497	7124
BRCA	TNF	Th17	-0.111996	0.000229166	0.000652304	7124
BRCA	TNF	Th2	0.0108529	0.721893	0.810003	7124
BRCA	TNF	Tr1	0.0117778	0.699302	0.891017	7124
BRCA	TNF	iTreg	0.101262	0.000870253	0.00353325	7124
BRCA	TNF	nTreg	0.0575599	0.0588606	0.170522	7124
BRCA	TNFRSF11B	Bcell	0.208506	4.71013e-12	7.65603e-11	4982
BRCA	TNFRSF11B	CD4_T	-0.240745	1.11641e-15	9.32219e-14	4982
BRCA	TNFRSF11B	CD4_naive	-0.0118478	0.697602	0.979845	4982
BRCA	TNFRSF11B	CD8_T	-0.062986	0.0386713	0.130751	4982
BRCA	TNFRSF11B	CD8_naive	0.0457381	0.133418	0.171755	4982
BRCA	TNFRSF11B	Central_memory	-0.0803559	0.00830223	0.0441958	4982
BRCA	TNFRSF11B	Cytotoxic	-0.00836004	0.783953	0.84382	4982
BRCA	TNFRSF11B	DC	0.190355	2.96976e-10	1.339e-08	4982
BRCA	TNFRSF11B	Effector_memory	0.102162	0.000781714	0.0044192	4982
BRCA	TNFRSF11B	Exhausted	0.0693607	0.0227615	0.0476446	4982
BRCA	TNFRSF11B	Gamma_delta	-0.229295	2.50849e-14	8.17201e-12	4982
BRCA	TNFRSF11B	InfiltrationScore	0.0737422	0.0154498	0.0388808	4982
BRCA	TNFRSF11B	MAIT	-0.0379865	0.212687	0.358325	4982
BRCA	TNFRSF11B	Macrophage	0.103613	0.000656476	0.00566388	4982
BRCA	TNFRSF11B	Monocyte	0.128559	2.2994e-05	0.000688049	4982
BRCA	TNFRSF11B	NK	-0.162291	8.42063e-08	1.02402e-06	4982
BRCA	TNFRSF11B	NKT	-0.183911	1.17749e-09	6.21814e-08	4982
BRCA	TNFRSF11B	Neutrophil	0.128381	2.3604e-05	0.000139523	4982
BRCA	TNFRSF11B	Tfh	-0.150201	7.2722e-07	7.04086e-06	4982
BRCA	TNFRSF11B	Th1	0.0843546	0.00558273	0.0180751	4982
BRCA	TNFRSF11B	Th17	-0.162524	8.06514e-08	3.56209e-07	4982
BRCA	TNFRSF11B	Th2	-0.0695517	0.0223891	0.0798426	4982
BRCA	TNFRSF11B	Tr1	0.146022	1.47489e-06	4.4887e-05	4982
BRCA	TNFRSF11B	iTreg	0.154687	3.3312e-07	8.95939e-06	4982
BRCA	TNFRSF11B	nTreg	0.13041	1.7459e-05	0.00126087	4982
CESC	FGF2	Bcell	0.0272251	0.64314	0.8705	2247
CESC	FGF2	CD4_T	0.100717	0.085788	0.440563	2247
CESC	FGF2	CD4_naive	-0.165666	0.00453409	0.440193	2247
CESC	FGF2	CD8_T	0.233389	5.6542e-05	0.0181088	2247
CESC	FGF2	CD8_naive	0.157168	0.00712574	0.0601493	2247
CESC	FGF2	Central_memory	0.193235	0.000902832	0.047786	2247
CESC	FGF2	Cytotoxic	0.198009	0.000666947	0.0189988	2247
CESC	FGF2	DC	-0.035233	0.548729	0.751187	2247
CESC	FGF2	Effector_memory	0.0457245	0.436335	0.971039	2247
CESC	FGF2	Exhausted	0.0883947	0.131821	0.476663	2247
CESC	FGF2	Gamma_delta	0.152508	0.00904974	0.161588	2247
CESC	FGF2	InfiltrationScore	0.0887331	0.130342	0.435957	2247
CESC	FGF2	MAIT	-0.0786337	0.180244	0.407053	2247
CESC	FGF2	Macrophage	-0.0119382	0.839032	0.969322	2247
CESC	FGF2	Monocyte	-0.100772	0.0856169	0.88182	2247
CESC	FGF2	NK	0.151352	0.00959335	0.399921	2247
CESC	FGF2	NKT	-0.169454	0.00368133	0.0390538	2247
CESC	FGF2	Neutrophil	-0.21302	0.000245758	0.016627	2247
CESC	FGF2	Tfh	0.193157	0.000907243	0.0672294	2247
CESC	FGF2	Th1	0.113431	0.0528366	0.366131	2247
CESC	FGF2	Th17	-0.124556	0.0333723	0.352788	2247
CESC	FGF2	Th2	0.0991029	0.0909569	0.371571	2247
CESC	FGF2	Tr1	0.0323055	0.582448	0.825755	2247
CESC	FGF2	iTreg	0.13417	0.021834	0.222343	2247
CESC	FGF2	nTreg	-0.0221328	0.706449	0.874741	2247
CESC	ICAM1	Bcell	0.0652784	0.26619	0.573436	3383
CESC	ICAM1	CD4_T	0.173954	0.00285866	0.0768846	3383
CESC	ICAM1	CD4_naive	-0.0495365	0.399024	0.922336	3383
CESC	ICAM1	CD8_T	0.131194	0.0249665	0.177995	3383
CESC	ICAM1	CD8_naive	0.0155546	0.791262	0.907922	3383
CESC	ICAM1	Central_memory	0.113957	0.05174	0.436609	3383
CESC	ICAM1	Cytotoxic	0.0973556	0.0968292	0.29614	3383
CESC	ICAM1	DC	0.0260126	0.658003	0.819557	3383
CESC	ICAM1	Effector_memory	-0.0642757	0.27362	0.971039	3383
CESC	ICAM1	Exhausted	-0.044377	0.449989	0.724278	3383
CESC	ICAM1	Gamma_delta	0.113035	0.053676	0.331439	3383
CESC	ICAM1	InfiltrationScore	0.0586261	0.318102	0.625376	3383
CESC	ICAM1	MAIT	-0.0167597	0.775505	0.90282	3383
CESC	ICAM1	Macrophage	-0.0296328	0.614047	0.861775	3383
CESC	ICAM1	Monocyte	-0.0930434	0.112615	0.88182	3383
CESC	ICAM1	NK	0.0644445	0.272359	0.600188	3383
CESC	ICAM1	NKT	0.0519793	0.376151	0.631249	3383
CESC	ICAM1	Neutrophil	-0.118143	0.0436697	0.19997	3383
CESC	ICAM1	Tfh	0.111311	0.057455	0.238203	3383
CESC	ICAM1	Th1	0.0229172	0.696551	0.953496	3383
CESC	ICAM1	Th17	-0.133478	0.0225302	0.306724	3383
CESC	ICAM1	Th2	0.113197	0.0533317	0.293135	3383
CESC	ICAM1	Tr1	0.121113	0.0386098	0.476037	3383
CESC	ICAM1	iTreg	0.0123418	0.833667	0.972162	3383
CESC	ICAM1	nTreg	-0.102195	0.0812659	0.316978	3383
CESC	ICAM3	Bcell	0.0606511	0.301645	0.603603	3385
CESC	ICAM3	CD4_T	0.16778	0.00403855	0.0937753	3385
CESC	ICAM3	CD4_naive	-0.0523702	0.372567	0.92042	3385
CESC	ICAM3	CD8_T	0.129185	0.0272933	0.184427	3385
CESC	ICAM3	CD8_naive	0.00650047	0.91193	0.961786	3385
CESC	ICAM3	Central_memory	0.106765	0.0684878	0.512827	3385
CESC	ICAM3	Cytotoxic	0.103081	0.0786494	0.261261	3385
CESC	ICAM3	DC	0.0369659	0.529232	0.739551	3385
CESC	ICAM3	Effector_memory	-0.0566378	0.33482	0.971039	3385
CESC	ICAM3	Exhausted	-0.0363725	0.535868	0.783566	3385
CESC	ICAM3	Gamma_delta	0.120124	0.0402376	0.301587	3385
CESC	ICAM3	InfiltrationScore	0.0675204	0.250081	0.574193	3385
CESC	ICAM3	MAIT	-0.0248193	0.672764	0.848963	3385
CESC	ICAM3	Macrophage	-0.0211517	0.7189	0.919444	3385
CESC	ICAM3	Monocyte	-0.0849958	0.147393	0.88182	3385
CESC	ICAM3	NK	0.065837	0.262112	0.593229	3385
CESC	ICAM3	NKT	0.0432456	0.461635	0.69945	3385
CESC	ICAM3	Neutrophil	-0.116589	0.0465344	0.205968	3385
CESC	ICAM3	Tfh	0.115304	0.0490183	0.215567	3385
CESC	ICAM3	Th1	0.0334413	0.569252	0.923897	3385
CESC	ICAM3	Th17	-0.145351	0.0129072	0.235074	3385
CESC	ICAM3	Th2	0.112575	0.0546623	0.295407	3385
CESC	ICAM3	Tr1	0.124279	0.0337702	0.451244	3385
CESC	ICAM3	iTreg	0.0131268	0.823256	0.970447	3385
CESC	ICAM3	nTreg	-0.0991312	0.0908642	0.335881	3385
CESC	ITGA2	Bcell	-0.0213545	0.71632	0.900013	3673
CESC	ITGA2	CD4_T	0.00992229	0.865931	0.970796	3673
CESC	ITGA2	CD4_naive	-0.0548436	0.35038	0.915063	3673
CESC	ITGA2	CD8_T	0.106076	0.070302	0.305372	3673
CESC	ITGA2	CD8_naive	-0.12435	0.0336678	0.134196	3673
CESC	ITGA2	Central_memory	-0.0367693	0.531426	0.978051	3673
CESC	ITGA2	Cytotoxic	0.177254	0.00236556	0.0364738	3673
CESC	ITGA2	DC	0.0629045	0.284006	0.583761	3673
CESC	ITGA2	Effector_memory	-0.00970106	0.868893	0.993304	3673
CESC	ITGA2	Exhausted	0.132267	0.0237954	0.336429	3673
CESC	ITGA2	Gamma_delta	0.121417	0.0381215	0.296016	3673
CESC	ITGA2	InfiltrationScore	0.202963	0.000483485	0.0658317	3673
CESC	ITGA2	MAIT	0.0381006	0.516658	0.744195	3673
CESC	ITGA2	Macrophage	0.200459	0.000569402	0.103785	3673
CESC	ITGA2	Monocyte	0.071426	0.223662	0.88182	3673
CESC	ITGA2	NK	0.111797	0.0563681	0.414561	3673
CESC	ITGA2	NKT	-0.0120251	0.837876	0.946802	3673
CESC	ITGA2	Neutrophil	-0.12787	0.0289153	0.167965	3673
CESC	ITGA2	Tfh	0.0812996	0.165874	0.444632	3673
CESC	ITGA2	Th1	0.124204	0.0338782	0.324474	3673
CESC	ITGA2	Th17	-0.0987565	0.0920978	0.427176	3673
CESC	ITGA2	Th2	-0.0906387	0.122256	0.43359	3673
CESC	ITGA2	Tr1	0.0831367	0.156483	0.501179	3673
CESC	ITGA2	iTreg	0.114331	0.0509713	0.270531	3673
CESC	ITGA2	nTreg	0.0138158	0.814144	0.930346	3673
CESC	LCP1	Bcell	-0.0713143	0.224389	0.539457	3936
CESC	LCP1	CD4_T	0.0543649	0.354608	0.735613	3936
CESC	LCP1	CD4_naive	-0.0490016	0.404141	0.924241	3936
CESC	LCP1	CD8_T	-0.0875428	0.135599	0.376339	3936
CESC	LCP1	CD8_naive	0.0978866	0.0950135	0.262439	3936
CESC	LCP1	Central_memory	-0.0191685	0.744291	0.978051	3936
CESC	LCP1	Cytotoxic	-0.0793237	0.176439	0.410773	3936
CESC	LCP1	DC	-0.145746	0.0126615	0.112231	3936
CESC	LCP1	Effector_memory	0.0222918	0.704439	0.982244	3936
CESC	LCP1	Exhausted	-0.0398382	0.497706	0.758465	3936
CESC	LCP1	Gamma_delta	0.0318087	0.588265	0.759253	3936
CESC	LCP1	InfiltrationScore	-0.135042	0.0209838	0.188614	3936
CESC	LCP1	MAIT	-0.0735845	0.209944	0.445301	3936
CESC	LCP1	Macrophage	-0.0874317	0.136098	0.382997	3936
CESC	LCP1	Monocyte	0.0637933	0.277244	0.88182	3936
CESC	LCP1	NK	-0.101004	0.084895	0.441363	3936
CESC	LCP1	NKT	-0.0094496	0.872262	0.957297	3936
CESC	LCP1	Neutrophil	0.0746277	0.203536	0.49291	3936
CESC	LCP1	Tfh	-0.0687025	0.241866	0.53668	3936
CESC	LCP1	Th1	-0.13496	0.0210625	0.309483	3936
CESC	LCP1	Th17	0.241031	3.1465e-05	0.00622034	3936
CESC	LCP1	Th2	-0.196205	0.000748402	0.13114	3936
CESC	LCP1	Tr1	-0.0543718	0.354547	0.66422	3936
CESC	LCP1	iTreg	-0.15006	0.0102353	0.192579	3936
CESC	LCP1	nTreg	0.0584182	0.319824	0.606653	3936
CESC	MMP1	Bcell	-0.124788	0.0330419	0.23898	4312
CESC	MMP1	CD4_T	-0.114285	0.0510671	0.366371	4312
CESC	MMP1	CD4_naive	0.130037	0.0262847	0.709444	4312
CESC	MMP1	CD8_T	-0.0802978	0.17117	0.413835	4312
CESC	MMP1	CD8_naive	-0.124171	0.033926	0.134876	4312
CESC	MMP1	Central_memory	-0.154017	0.00838163	0.165412	4312
CESC	MMP1	Cytotoxic	-0.0543572	0.354677	0.615311	4312
CESC	MMP1	DC	-0.0520519	0.375483	0.647742	4312
CESC	MMP1	Effector_memory	-0.0524263	0.372054	0.971039	4312
CESC	MMP1	Exhausted	-0.0289007	0.622832	0.829701	4312
CESC	MMP1	Gamma_delta	-0.0882678	0.132378	0.4262	4312
CESC	MMP1	InfiltrationScore	-0.0643837	0.272813	0.591589	4312
CESC	MMP1	MAIT	-0.0603351	0.304176	0.555293	4312
CESC	MMP1	Macrophage	-0.0678903	0.247489	0.507035	4312
CESC	MMP1	Monocyte	0.0491438	0.402777	0.912444	4312
CESC	MMP1	NK	0.0269113	0.646974	0.816661	4312
CESC	MMP1	NKT	0.106326	0.0696382	0.26652	4312
CESC	MMP1	Neutrophil	0.151222	0.00965649	0.0963982	4312
CESC	MMP1	Tfh	-0.178475	0.00220367	0.0686289	4312
CESC	MMP1	Th1	-0.0256914	0.661963	0.940538	4312
CESC	MMP1	Th17	0.0840412	0.152009	0.538051	4312
CESC	MMP1	Th2	0.0327653	0.577089	0.819096	4312
CESC	MMP1	Tr1	-0.102937	0.0790687	0.48236	4312
CESC	MMP1	iTreg	-0.0188853	0.747941	0.943527	4312
CESC	MMP1	nTreg	0.191978	0.000976648	0.0367913	4312
CESC	MMP10	Bcell	-0.126399	0.030826	0.230448	4319
CESC	MMP10	CD4_T	-0.115749	0.0481459	0.35308	4319
CESC	MMP10	CD4_naive	0.127747	0.0290711	0.709444	4319
CESC	MMP10	CD8_T	-0.0788954	0.178794	0.418742	4319
CESC	MMP10	CD8_naive	-0.125856	0.0315587	0.12942	4319
CESC	MMP10	Central_memory	-0.153142	0.00876366	0.166834	4319
CESC	MMP10	Cytotoxic	-0.0520882	0.37515	0.634578	4319
CESC	MMP10	DC	-0.0495281	0.399103	0.665668	4319
CESC	MMP10	Effector_memory	-0.0510215	0.385021	0.971039	4319
CESC	MMP10	Exhausted	-0.0260906	0.657043	0.849768	4319
CESC	MMP10	Gamma_delta	-0.0858227	0.143482	0.442556	4319
CESC	MMP10	InfiltrationScore	-0.0623872	0.287993	0.606134	4319
CESC	MMP10	MAIT	-0.0634539	0.279813	0.529106	4319
CESC	MMP10	Macrophage	-0.0657375	0.262835	0.516852	4319
CESC	MMP10	Monocyte	0.0505808	0.389145	0.912444	4319
CESC	MMP10	NK	0.0281045	0.632448	0.806512	4319
CESC	MMP10	NKT	0.107287	0.0671381	0.261072	4319
CESC	MMP10	Neutrophil	0.149408	0.0105732	0.101857	4319
CESC	MMP10	Tfh	-0.177413	0.00234378	0.0686289	4319
CESC	MMP10	Th1	-0.0232455	0.692423	0.950609	4319
CESC	MMP10	Th17	0.0827977	0.158185	0.547064	4319
CESC	MMP10	Th2	0.0335713	0.567751	0.813132	4319
CESC	MMP10	Tr1	-0.102799	0.0794729	0.48236	4319
CESC	MMP10	iTreg	-0.0191582	0.744423	0.943527	4319
CESC	MMP10	nTreg	0.192037	0.000973035	0.0367357	4319
CESC	MMP12	Bcell	-0.109884	0.0607483	0.340055	4321
CESC	MMP12	CD4_T	-0.0940619	0.108715	0.498851	4321
CESC	MMP12	CD4_naive	0.140836	0.0160269	0.595986	4321
CESC	MMP12	CD8_T	-0.0758808	0.196027	0.435034	4321
CESC	MMP12	CD8_naive	-0.113854	0.051954	0.178293	4321
CESC	MMP12	Central_memory	-0.149232	0.0106663	0.185917	4321
CESC	MMP12	Cytotoxic	-0.0562714	0.337962	0.601378	4321
CESC	MMP12	DC	-0.0618427	0.292229	0.588018	4321
CESC	MMP12	Effector_memory	-0.0523538	0.372717	0.971039	4321
CESC	MMP12	Exhausted	-0.0219852	0.708318	0.879695	4321
CESC	MMP12	Gamma_delta	-0.0828713	0.157814	0.465003	4321
CESC	MMP12	InfiltrationScore	-0.0635176	0.279329	0.597773	4321
CESC	MMP12	MAIT	-0.0686643	0.242128	0.487629	4321
CESC	MMP12	Macrophage	-0.0759846	0.195414	0.454538	4321
CESC	MMP12	Monocyte	0.049306	0.401224	0.912444	4321
CESC	MMP12	NK	0.0216256	0.712876	0.859426	4321
CESC	MMP12	NKT	0.0799005	0.173304	0.410963	4321
CESC	MMP12	Neutrophil	0.149361	0.010598	0.102054	4321
CESC	MMP12	Tfh	-0.173953	0.00285881	0.0712727	4321
CESC	MMP12	Th1	-0.0333132	0.570734	0.925481	4321
CESC	MMP12	Th17	0.0660906	0.260274	0.647451	4321
CESC	MMP12	Th2	0.0500944	0.393728	0.675967	4321
CESC	MMP12	Tr1	-0.0954515	0.103568	0.48236	4321
CESC	MMP12	iTreg	-0.0241466	0.68114	0.914221	4321
CESC	MMP12	nTreg	0.181059	0.00189387	0.0517181	4321
CESC	MMP13	Bcell	-0.103485	0.0774775	0.382672	4322
CESC	MMP13	CD4_T	-0.091892	0.117154	0.511181	4322
CESC	MMP13	CD4_naive	0.145655	0.0127179	0.532873	4322
CESC	MMP13	CD8_T	-0.071252	0.224795	0.462859	4322
CESC	MMP13	CD8_naive	-0.111442	0.05716	0.187529	4322
CESC	MMP13	Central_memory	-0.140638	0.0161779	0.229043	4322
CESC	MMP13	Cytotoxic	-0.0497582	0.396914	0.652867	4322
CESC	MMP13	DC	-0.054853	0.350298	0.630243	4322
CESC	MMP13	Effector_memory	-0.0651853	0.266874	0.971039	4322
CESC	MMP13	Exhausted	-0.0136395	0.816473	0.934755	4322
CESC	MMP13	Gamma_delta	-0.0809779	0.167561	0.476245	4322
CESC	MMP13	InfiltrationScore	-0.0495938	0.398477	0.690971	4322
CESC	MMP13	MAIT	-0.0658531	0.261995	0.509918	4322
CESC	MMP13	Macrophage	-0.0623588	0.288212	0.55185	4322
CESC	MMP13	Monocyte	0.0476426	0.417316	0.912444	4322
CESC	MMP13	NK	0.031892	0.587287	0.782975	4322
CESC	MMP13	NKT	0.0762323	0.193957	0.434226	4322
CESC	MMP13	Neutrophil	0.138985	0.0174855	0.136648	4322
CESC	MMP13	Tfh	-0.1615	0.00567372	0.087388	4322
CESC	MMP13	Th1	-0.0304916	0.603812	0.927759	4322
CESC	MMP13	Th17	0.0596032	0.310089	0.677469	4322
CESC	MMP13	Th2	0.0602666	0.304726	0.605601	4322
CESC	MMP13	Tr1	-0.0889697	0.129316	0.48236	4322
CESC	MMP13	iTreg	-0.0385167	0.512086	0.834419	4322
CESC	MMP13	nTreg	0.169177	0.00373845	0.075257	4322
CESC	MMP14	Bcell	0.0618337	0.292299	0.59704	4323
CESC	MMP14	CD4_T	-0.00161883	0.978026	0.992428	4323
CESC	MMP14	CD4_naive	0.0295026	0.615606	0.928077	4323
CESC	MMP14	CD8_T	-0.10804	0.065232	0.296906	4323
CESC	MMP14	CD8_naive	0.207009	0.000369661	0.0131785	4323
CESC	MMP14	Central_memory	-0.0775964	0.186076	0.834547	4323
CESC	MMP14	Cytotoxic	-0.158079	0.00679523	0.0701669	4323
CESC	MMP14	DC	0.143667	0.0140021	0.117924	4323
CESC	MMP14	Effector_memory	0.0289075	0.622751	0.975647	4323
CESC	MMP14	Exhausted	-0.0817774	0.163392	0.501718	4323
CESC	MMP14	Gamma_delta	-0.0594027	0.311723	0.603765	4323
CESC	MMP14	InfiltrationScore	-0.00425496	0.942286	0.970897	4323
CESC	MMP14	MAIT	0.000245018	0.996674	0.999219	4323
CESC	MMP14	Macrophage	0.0724841	0.21686	0.478844	4323
CESC	MMP14	Monocyte	0.0189935	0.746545	0.968189	4323
CESC	MMP14	NK	-0.110242	0.0599084	0.41876	4323
CESC	MMP14	NKT	0.238256	3.9015e-05	0.0061892	4323
CESC	MMP14	Neutrophil	0.0339028	0.563931	0.790964	4323
CESC	MMP14	Tfh	-0.127724	0.0290999	0.164006	4323
CESC	MMP14	Th1	-0.00687455	0.906884	0.979828	4323
CESC	MMP14	Th17	-0.0955161	0.103333	0.45116	4323
CESC	MMP14	Th2	0.103183	0.0783527	0.355422	4323
CESC	MMP14	Tr1	0.121879	0.0373873	0.473555	4323
CESC	MMP14	iTreg	-0.08978	0.12585	0.418908	4323
CESC	MMP14	nTreg	-0.0927459	0.113774	0.380452	4323
CESC	MMP2	Bcell	0.00859865	0.88368	0.966179	4313
CESC	MMP2	CD4_T	0.0494033	0.400294	0.761476	4313
CESC	MMP2	CD4_naive	-0.020353	0.72909	0.928077	4313
CESC	MMP2	CD8_T	0.00320699	0.956484	0.978179	4313
CESC	MMP2	CD8_naive	0.0321645	0.584097	0.774465	4313
CESC	MMP2	Central_memory	0.00627823	0.914929	0.991356	4313
CESC	MMP2	Cytotoxic	0.00474361	0.935671	0.972784	4313
CESC	MMP2	DC	0.0224226	0.702786	0.840167	4313
CESC	MMP2	Effector_memory	-0.106604	0.0689081	0.80119	4313
CESC	MMP2	Exhausted	-0.0434744	0.459267	0.729829	4313
CESC	MMP2	Gamma_delta	-0.0181541	0.757389	0.851979	4313
CESC	MMP2	InfiltrationScore	0.0818464	0.163036	0.488387	4313
CESC	MMP2	MAIT	0.067695	0.248855	0.494211	4313
CESC	MMP2	Macrophage	0.0862881	0.141315	0.388059	4313
CESC	MMP2	Monocyte	-0.00797379	0.892079	0.988281	4313
CESC	MMP2	NK	0.0529176	0.367584	0.653796	4313
CESC	MMP2	NKT	0.24028	3.3357e-05	0.0061892	4313
CESC	MMP2	Neutrophil	-0.0547856	0.350891	0.639383	4313
CESC	MMP2	Tfh	0.0307294	0.600991	0.820592	4313
CESC	MMP2	Th1	-0.0106988	0.85555	0.972105	4313
CESC	MMP2	Th17	-0.0608593	0.299985	0.67048	4313
CESC	MMP2	Th2	0.0718156	0.22114	0.553279	4313
CESC	MMP2	Tr1	0.0746506	0.203397	0.545042	4313
CESC	MMP2	iTreg	-0.0224234	0.702776	0.923306	4313
CESC	MMP2	nTreg	-0.18039	0.00197005	0.0529785	4313
CESC	MMP3	Bcell	-0.0993397	0.0901836	0.407651	4314
CESC	MMP3	CD4_T	-0.0974312	0.0965692	0.469519	4314
CESC	MMP3	CD4_naive	0.137259	0.0189488	0.686968	4314
CESC	MMP3	CD8_T	-0.070195	0.231765	0.469727	4314
CESC	MMP3	CD8_naive	-0.123215	0.0353361	0.138529	4314
CESC	MMP3	Central_memory	-0.14449	0.0134572	0.204345	4314
CESC	MMP3	Cytotoxic	-0.0530985	0.365946	0.626202	4314
CESC	MMP3	DC	-0.0508618	0.386513	0.65375	4314
CESC	MMP3	Effector_memory	-0.0544847	0.353547	0.971039	4314
CESC	MMP3	Exhausted	-0.0269526	0.646468	0.844248	4314
CESC	MMP3	Gamma_delta	-0.0951858	0.104537	0.393901	4314
CESC	MMP3	InfiltrationScore	-0.0506181	0.388795	0.682674	4314
CESC	MMP3	MAIT	-0.0584783	0.319326	0.571895	4314
CESC	MMP3	Macrophage	-0.0638961	0.276469	0.536469	4314
CESC	MMP3	Monocyte	0.0554843	0.344773	0.912444	4314
CESC	MMP3	NK	0.0210434	0.720278	0.864199	4314
CESC	MMP3	NKT	0.0842235	0.151119	0.384218	4314
CESC	MMP3	Neutrophil	0.149918	0.0103079	0.0996745	4314
CESC	MMP3	Tfh	-0.166378	0.00436142	0.0768899	4314
CESC	MMP3	Th1	-0.0313596	0.593545	0.927759	4314
CESC	MMP3	Th17	0.0740644	0.206978	0.601813	4314
CESC	MMP3	Th2	0.0382804	0.514679	0.771901	4314
CESC	MMP3	Tr1	-0.0869213	0.138408	0.48236	4314
CESC	MMP3	iTreg	-0.0261793	0.655952	0.901272	4314
CESC	MMP3	nTreg	0.17327	0.00297174	0.0635895	4314
CESC	MMP9	Bcell	0.233487	5.6126e-05	0.00397873	4318
CESC	MMP9	CD4_T	0.0238924	0.684316	0.915832	4318
CESC	MMP9	CD4_naive	0.00941442	0.872734	0.970732	4318
CESC	MMP9	CD8_T	-0.0484049	0.409894	0.628803	4318
CESC	MMP9	CD8_naive	0.097772	0.0954032	0.263013	4318
CESC	MMP9	Central_memory	0.0277278	0.637018	0.978051	4318
CESC	MMP9	Cytotoxic	-0.0439064	0.454813	0.705209	4318
CESC	MMP9	DC	-0.0836455	0.153954	0.458238	4318
CESC	MMP9	Effector_memory	-0.0820409	0.162035	0.883335	4318
CESC	MMP9	Exhausted	-0.0279242	0.634634	0.837226	4318
CESC	MMP9	Gamma_delta	0.0481912	0.411968	0.666202	4318
CESC	MMP9	InfiltrationScore	-0.0248119	0.672855	0.837378	4318
CESC	MMP9	MAIT	-0.118726	0.0426362	0.223927	4318
CESC	MMP9	Macrophage	-0.000241727	0.996718	0.998482	4318
CESC	MMP9	Monocyte	-0.0779939	0.183825	0.88182	4318
CESC	MMP9	NK	-0.0528561	0.368141	0.653796	4318
CESC	MMP9	NKT	0.0689201	0.240374	0.492885	4318
CESC	MMP9	Neutrophil	0.000575776	0.992184	0.998486	4318
CESC	MMP9	Tfh	0.0116585	0.842754	0.929163	4318
CESC	MMP9	Th1	-0.031527	0.591574	0.927759	4318
CESC	MMP9	Th17	0.00533714	0.927643	0.976637	4318
CESC	MMP9	Th2	-0.101371	0.0837625	0.3577	4318
CESC	MMP9	Tr1	0.101424	0.0836011	0.48236	4318
CESC	MMP9	iTreg	-0.0916693	0.118048	0.403409	4318
CESC	MMP9	nTreg	-0.00749447	0.89853	0.95598	4318
CESC	SERPINE1	Bcell	0.0585297	0.3189	0.61883	5054
CESC	SERPINE1	CD4_T	0.0105695	0.857277	0.970796	5054
CESC	SERPINE1	CD4_naive	-0.0867268	0.139296	0.815479	5054
CESC	SERPINE1	CD8_T	0.106849	0.0682684	0.301345	5054
CESC	SERPINE1	CD8_naive	-0.108636	0.0637542	0.199599	5054
CESC	SERPINE1	Central_memory	0.0923857	0.11519	0.672985	5054
CESC	SERPINE1	Cytotoxic	0.147813	0.0114422	0.0916776	5054
CESC	SERPINE1	DC	0.0298925	0.610944	0.791439	5054
CESC	SERPINE1	Effector_memory	-0.0530375	0.366497	0.971039	5054
CESC	SERPINE1	Exhausted	0.0475306	0.418413	0.70211	5054
CESC	SERPINE1	Gamma_delta	0.0206241	0.725625	0.831106	5054
CESC	SERPINE1	InfiltrationScore	0.15815	0.00677013	0.135814	5054
CESC	SERPINE1	MAIT	0.0763447	0.193299	0.423511	5054
CESC	SERPINE1	Macrophage	0.100053	0.087887	0.324098	5054
CESC	SERPINE1	Monocyte	-0.0128043	0.82753	0.981831	5054
CESC	SERPINE1	NK	0.0990544	0.0911161	0.443131	5054
CESC	SERPINE1	NKT	-0.0840086	0.152168	0.385504	5054
CESC	SERPINE1	Neutrophil	-0.0909551	0.120952	0.369322	5054
CESC	SERPINE1	Tfh	0.112126	0.0556425	0.233832	5054
CESC	SERPINE1	Th1	0.0427192	0.467111	0.877862	5054
CESC	SERPINE1	Th17	-0.0618845	0.291902	0.665914	5054
CESC	SERPINE1	Th2	0.04628	0.430777	0.704068	5054
CESC	SERPINE1	Tr1	0.0899804	0.125004	0.48236	5054
CESC	SERPINE1	iTreg	0.0133311	0.820552	0.969753	5054
CESC	SERPINE1	nTreg	-0.0948749	0.10568	0.36904	5054
CESC	SPP1	Bcell	-0.00649031	0.912067	0.97226	6696
CESC	SPP1	CD4_T	0.0673897	0.251001	0.643131	6696
CESC	SPP1	CD4_naive	-0.123754	0.0345352	0.762247	6696
CESC	SPP1	CD8_T	0.149599	0.0104731	0.115518	6696
CESC	SPP1	CD8_naive	0.138015	0.0182955	0.0969861	6696
CESC	SPP1	Central_memory	0.172584	0.00308939	0.117356	6696
CESC	SPP1	Cytotoxic	0.13264	0.0233987	0.136497	6696
CESC	SPP1	DC	-0.0423879	0.470576	0.71024	6696
CESC	SPP1	Effector_memory	0.0964113	0.100126	0.859962	6696
CESC	SPP1	Exhausted	0.032528	0.579852	0.805475	6696
CESC	SPP1	Gamma_delta	0.0790979	0.177677	0.487352	6696
CESC	SPP1	InfiltrationScore	0.047593	0.417802	0.704869	6696
CESC	SPP1	MAIT	-0.0929296	0.113057	0.324998	6696
CESC	SPP1	Macrophage	-0.0134397	0.819116	0.959666	6696
CESC	SPP1	Monocyte	-0.0461709	0.431866	0.913494	6696
CESC	SPP1	NK	0.085398	0.14548	0.493682	6696
CESC	SPP1	NKT	-0.177133	0.00238212	0.0310883	6696
CESC	SPP1	Neutrophil	-0.157618	0.00696082	0.0777045	6696
CESC	SPP1	Tfh	0.12128	0.0383413	0.188499	6696
CESC	SPP1	Th1	0.0572704	0.329441	0.802231	6696
CESC	SPP1	Th17	-0.0914127	0.119085	0.482717	6696
CESC	SPP1	Th2	0.0743463	0.20525	0.546435	6696
CESC	SPP1	Tr1	0.0191336	0.74474	0.913256	6696
CESC	SPP1	iTreg	0.141688	0.0153924	0.206702	6696
CESC	SPP1	nTreg	0.024857	0.672295	0.855864	6696
CESC	TIMP2	Bcell	0.043738	0.456546	0.7421	7077
CESC	TIMP2	CD4_T	0.052002	0.375941	0.749182	7077
CESC	TIMP2	CD4_naive	0.0183578	0.754752	0.928536	7077
CESC	TIMP2	CD8_T	-0.020157	0.731598	0.849533	7077
CESC	TIMP2	CD8_naive	0.0476099	0.417637	0.657273	7077
CESC	TIMP2	Central_memory	-0.16127	0.0057436	0.14431	7077
CESC	TIMP2	Cytotoxic	-0.0501489	0.393213	0.649504	7077
CESC	TIMP2	DC	-0.10115	0.0844435	0.317007	7077
CESC	TIMP2	Effector_memory	-0.0196202	0.738482	0.987114	7077
CESC	TIMP2	Exhausted	0.0970812	0.0977781	0.44398	7077
CESC	TIMP2	Gamma_delta	0.0709418	0.226825	0.535626	7077
CESC	TIMP2	InfiltrationScore	-0.0449623	0.444029	0.729276	7077
CESC	TIMP2	MAIT	-0.134009	0.0219946	0.16512	7077
CESC	TIMP2	Macrophage	-0.0563846	0.336989	0.606109	7077
CESC	TIMP2	Monocyte	-0.00498013	0.932471	0.993585	7077
CESC	TIMP2	NK	0.00366887	0.950224	0.977467	7077
CESC	TIMP2	NKT	0.0598674	0.307946	0.562214	7077
CESC	TIMP2	Neutrophil	0.0603895	0.303739	0.604391	7077
CESC	TIMP2	Tfh	-0.0668083	0.255122	0.5474	7077
CESC	TIMP2	Th1	0.00148945	0.979782	0.994562	7077
CESC	TIMP2	Th17	0.0181718	0.757159	0.897533	7077
CESC	TIMP2	Th2	0.0135404	0.817784	0.92234	7077
CESC	TIMP2	Tr1	-0.120417	0.0397493	0.477836	7077
CESC	TIMP2	iTreg	-0.144483	0.0134614	0.204579	7077
CESC	TIMP2	nTreg	0.0221202	0.706609	0.874845	7077
CESC	TNF	Bcell	-0.08525	0.146182	0.490099	7124
CESC	TNF	CD4_T	-0.105509	0.0718237	0.414906	7124
CESC	TNF	CD4_naive	0.0700845	0.232503	0.818539	7124
CESC	TNF	CD8_T	-0.0735502	0.210157	0.447204	7124
CESC	TNF	CD8_naive	-0.0415381	0.479527	0.70634	7124
CESC	TNF	Central_memory	-0.0557597	0.34238	0.978051	7124
CESC	TNF	Cytotoxic	-0.056261	0.338051	0.601378	7124
CESC	TNF	DC	0.081089	0.166977	0.475676	7124
CESC	TNF	Effector_memory	-0.0507044	0.387985	0.971039	7124
CESC	TNF	Exhausted	0.11368	0.0523164	0.388356	7124
CESC	TNF	Gamma_delta	-0.0406578	0.488895	0.702195	7124
CESC	TNF	InfiltrationScore	-0.0422889	0.471614	0.739301	7124
CESC	TNF	MAIT	-0.0124408	0.832353	0.925192	7124
CESC	TNF	Macrophage	0.00166898	0.977345	0.997594	7124
CESC	TNF	Monocyte	-0.0484766	0.409201	0.912444	7124
CESC	TNF	NK	-0.0109326	0.852428	0.933526	7124
CESC	TNF	NKT	0.131332	0.0248123	0.151188	7124
CESC	TNF	Neutrophil	0.046724	0.426364	0.689912	7124
CESC	TNF	Tfh	-0.102163	0.0813631	0.297567	7124
CESC	TNF	Th1	0.133202	0.0228131	0.309483	7124
CESC	TNF	Th17	-0.015066	0.797674	0.912338	7124
CESC	TNF	Th2	-0.0284094	0.628758	0.842259	7124
CESC	TNF	Tr1	-0.0716769	0.222036	0.557535	7124
CESC	TNF	iTreg	0.0847409	0.148615	0.441248	7124
CESC	TNF	nTreg	0.0716737	0.222056	0.509718	7124
CESC	TNFRSF11B	Bcell	-0.0375659	0.522563	0.799821	4982
CESC	TNFRSF11B	CD4_T	-0.153896	0.00843356	0.139934	4982
CESC	TNFRSF11B	CD4_naive	0.0200184	0.733374	0.928077	4982
CESC	TNFRSF11B	CD8_T	-0.0392448	0.504136	0.703513	4982
CESC	TNFRSF11B	CD8_naive	-0.0532463	0.364611	0.608475	4982
CESC	TNFRSF11B	Central_memory	0.012678	0.829205	0.985058	4982
CESC	TNFRSF11B	Cytotoxic	-0.0110429	0.850957	0.937466	4982
CESC	TNFRSF11B	DC	0.189729	0.0011227	0.0446458	4982
CESC	TNFRSF11B	Effector_memory	-0.00931831	0.874022	0.993304	4982
CESC	TNFRSF11B	Exhausted	0.0329487	0.574958	0.803293	4982
CESC	TNFRSF11B	Gamma_delta	-0.0717166	0.221779	0.530426	4982
CESC	TNFRSF11B	InfiltrationScore	0.0647112	0.270376	0.591589	4982
CESC	TNFRSF11B	MAIT	-0.0397678	0.498466	0.73315	4982
CESC	TNFRSF11B	Macrophage	0.099574	0.0894237	0.324098	4982
CESC	TNFRSF11B	Monocyte	0.079742	0.174162	0.88182	4982
CESC	TNFRSF11B	NK	-0.0279369	0.63448	0.807946	4982
CESC	TNFRSF11B	NKT	-0.196665	0.00072681	0.0134033	4982
CESC	TNFRSF11B	Neutrophil	0.0413394	0.481633	0.729594	4982
CESC	TNFRSF11B	Tfh	-0.0366414	0.532856	0.777754	4982
CESC	TNFRSF11B	Th1	0.07506	0.200922	0.649598	4982
CESC	TNFRSF11B	Th17	-0.209835	0.000305545	0.0211626	4982
CESC	TNFRSF11B	Th2	0.0624959	0.287152	0.595406	4982
CESC	TNFRSF11B	Tr1	0.0761645	0.194355	0.539071	4982
CESC	TNFRSF11B	iTreg	0.0812777	0.165988	0.462567	4982
CESC	TNFRSF11B	nTreg	-0.0825698	0.159337	0.44667	4982
CHOL	FGF2	Bcell	-0.157739	0.358199	0.962937	2247
CHOL	FGF2	CD4_T	-0.008951	0.958679	0.984238	2247
CHOL	FGF2	CD4_naive	-0.254109	0.134779	0.438909	2247
CHOL	FGF2	CD8_T	0.102292	0.552746	0.969898	2247
CHOL	FGF2	CD8_naive	0.596404	0.000123674	0.0401615	2247
CHOL	FGF2	Central_memory	0.00826264	0.961854	0.987677	2247
CHOL	FGF2	Cytotoxic	0.0853447	0.62067	0.962854	2247
CHOL	FGF2	DC	0.067645	0.695062	0.97698	2247
CHOL	FGF2	Effector_memory	0.267344	0.114957	0.886103	2247
CHOL	FGF2	Exhausted	0.208786	0.221696	0.880692	2247
CHOL	FGF2	Gamma_delta	0.0390993	0.820888	0.998432	2247
CHOL	FGF2	InfiltrationScore	-0.149652	0.383674	0.776684	2247
CHOL	FGF2	MAIT	0.112757	0.512624	0.982675	2247
CHOL	FGF2	Macrophage	-0.289779	0.0864716	0.678796	2247
CHOL	FGF2	Monocyte	-0.0215026	0.900938	0.990058	2247
CHOL	FGF2	NK	0.0131316	0.939409	0.978118	2247
CHOL	FGF2	NKT	0.118498	0.491248	0.961709	2247
CHOL	FGF2	Neutrophil	-0.18224	0.287424	0.952536	2247
CHOL	FGF2	Tfh	0.107542	0.532435	0.998527	2247
CHOL	FGF2	Th1	0.224818	0.187419	0.912635	2247
CHOL	FGF2	Th17	-0.339363	0.0428827	0.883216	2247
CHOL	FGF2	Th2	-0.0151935	0.929918	0.994212	2247
CHOL	FGF2	Tr1	-0.0661945	0.701296	0.96588	2247
CHOL	FGF2	iTreg	-0.00058242	0.99731	0.999402	2247
CHOL	FGF2	nTreg	0.269345	0.112162	0.828322	2247
CHOL	ICAM1	Bcell	-0.102485	0.551992	0.962937	3383
CHOL	ICAM1	CD4_T	-0.00978688	0.954824	0.984238	3383
CHOL	ICAM1	CD4_naive	0.116443	0.498846	0.679604	3383
CHOL	ICAM1	CD8_T	-0.0464727	0.787821	0.991166	3383
CHOL	ICAM1	CD8_naive	-0.0159846	0.926278	0.990672	3383
CHOL	ICAM1	Central_memory	-0.190016	0.266994	0.716049	3383
CHOL	ICAM1	Cytotoxic	-0.0633245	0.713689	0.962854	3383
CHOL	ICAM1	DC	0.13656	0.427095	0.97698	3383
CHOL	ICAM1	Effector_memory	-0.0233469	0.892488	0.994954	3383
CHOL	ICAM1	Exhausted	0.025878	0.880912	0.983684	3383
CHOL	ICAM1	Gamma_delta	-0.0568525	0.741896	0.998432	3383
CHOL	ICAM1	InfiltrationScore	0.0426052	0.805124	0.970173	3383
CHOL	ICAM1	MAIT	-0.114223	0.50712	0.982675	3383
CHOL	ICAM1	Macrophage	-0.0263869	0.878587	0.969316	3383
CHOL	ICAM1	Monocyte	0.155262	0.365891	0.974808	3383
CHOL	ICAM1	NK	-0.0733732	0.670635	0.976442	3383
CHOL	ICAM1	NKT	0.18015	0.293081	0.951872	3383
CHOL	ICAM1	Neutrophil	-0.0367008	0.831713	0.994518	3383
CHOL	ICAM1	Tfh	0.00245115	0.98868	0.998527	3383
CHOL	ICAM1	Th1	-0.195379	0.253474	0.912635	3383
CHOL	ICAM1	Th17	-0.0046341	0.978601	0.995447	3383
CHOL	ICAM1	Th2	0.176376	0.303478	0.994212	3383
CHOL	ICAM1	Tr1	0.0348957	0.83988	0.96588	3383
CHOL	ICAM1	iTreg	0.0245879	0.88681	0.977941	3383
CHOL	ICAM1	nTreg	0.0261329	0.879748	0.952559	3383
CHOL	ICAM3	Bcell	-0.102485	0.551992	0.962937	3385
CHOL	ICAM3	CD4_T	-0.00978688	0.954824	0.984238	3385
CHOL	ICAM3	CD4_naive	0.116443	0.498846	0.679604	3385
CHOL	ICAM3	CD8_T	-0.0464727	0.787821	0.991166	3385
CHOL	ICAM3	CD8_naive	-0.0159846	0.926278	0.990672	3385
CHOL	ICAM3	Central_memory	-0.190016	0.266994	0.716049	3385
CHOL	ICAM3	Cytotoxic	-0.0633245	0.713689	0.962854	3385
CHOL	ICAM3	DC	0.13656	0.427095	0.97698	3385
CHOL	ICAM3	Effector_memory	-0.0233469	0.892488	0.994954	3385
CHOL	ICAM3	Exhausted	0.025878	0.880912	0.983684	3385
CHOL	ICAM3	Gamma_delta	-0.0568525	0.741896	0.998432	3385
CHOL	ICAM3	InfiltrationScore	0.0426052	0.805124	0.970173	3385
CHOL	ICAM3	MAIT	-0.114223	0.50712	0.982675	3385
CHOL	ICAM3	Macrophage	-0.0263869	0.878587	0.969316	3385
CHOL	ICAM3	Monocyte	0.155262	0.365891	0.974808	3385
CHOL	ICAM3	NK	-0.0733732	0.670635	0.976442	3385
CHOL	ICAM3	NKT	0.18015	0.293081	0.951872	3385
CHOL	ICAM3	Neutrophil	-0.0367008	0.831713	0.994518	3385
CHOL	ICAM3	Tfh	0.00245115	0.98868	0.998527	3385
CHOL	ICAM3	Th1	-0.195379	0.253474	0.912635	3385
CHOL	ICAM3	Th17	-0.0046341	0.978601	0.995447	3385
CHOL	ICAM3	Th2	0.176376	0.303478	0.994212	3385
CHOL	ICAM3	Tr1	0.0348957	0.83988	0.96588	3385
CHOL	ICAM3	iTreg	0.0245879	0.88681	0.977941	3385
CHOL	ICAM3	nTreg	0.0261329	0.879748	0.952559	3385
CHOL	ITGA2	Bcell	-0.0126191	0.94177	0.991359	3673
CHOL	ITGA2	CD4_T	-0.100779	0.558664	0.961655	3673
CHOL	ITGA2	CD4_naive	0.135832	0.429587	0.642921	3673
CHOL	ITGA2	CD8_T	-0.295803	0.0798396	0.969898	3673
CHOL	ITGA2	CD8_naive	-0.102559	0.551702	0.986588	3673
CHOL	ITGA2	Central_memory	-0.267421	0.114848	0.716049	3673
CHOL	ITGA2	Cytotoxic	-0.174036	0.31004	0.962854	3673
CHOL	ITGA2	DC	0.0765914	0.657055	0.97698	3673
CHOL	ITGA2	Effector_memory	0.101598	0.555455	0.994954	3673
CHOL	ITGA2	Exhausted	-0.289113	0.0872296	0.880692	3673
CHOL	ITGA2	Gamma_delta	0.0605031	0.725942	0.998432	3673
CHOL	ITGA2	InfiltrationScore	0.235582	0.166615	0.690192	3673
CHOL	ITGA2	MAIT	-0.129113	0.45296	0.982675	3673
CHOL	ITGA2	Macrophage	0.175335	0.306387	0.706049	3673
CHOL	ITGA2	Monocyte	0.381703	0.0216106	0.974808	3673
CHOL	ITGA2	NK	0.0826521	0.631773	0.976442	3673
CHOL	ITGA2	NKT	-0.0128141	0.940872	0.988031	3673
CHOL	ITGA2	Neutrophil	0.3015	0.0739369	0.776892	3673
CHOL	ITGA2	Tfh	-0.209406	0.220296	0.998527	3673
CHOL	ITGA2	Th1	-0.348973	0.0369758	0.835487	3673
CHOL	ITGA2	Th17	0.152752	0.373787	0.937361	3673
CHOL	ITGA2	Th2	0.46604	0.00417397	0.554155	3673
CHOL	ITGA2	Tr1	-0.157373	0.35933	0.8562	3673
CHOL	ITGA2	iTreg	-0.290692	0.0854394	0.499712	3673
CHOL	ITGA2	nTreg	-0.0759624	0.659701	0.950772	3673
CHOL	LCP1	Bcell	-0.152459	0.374714	0.962937	3936
CHOL	LCP1	CD4_T	-0.0778543	0.651754	0.966476	3936
CHOL	LCP1	CD4_naive	0.231845	0.17364	0.498856	3936
CHOL	LCP1	CD8_T	-0.0880005	0.609799	0.969898	3936
CHOL	LCP1	CD8_naive	0.135628	0.430284	0.986588	3936
CHOL	LCP1	Central_memory	0.113185	0.511013	0.758307	3936
CHOL	LCP1	Cytotoxic	-0.0850872	0.621728	0.962854	3936
CHOL	LCP1	DC	-0.053807	0.755288	0.97698	3936
CHOL	LCP1	Effector_memory	0.100943	0.558023	0.994954	3936
CHOL	LCP1	Exhausted	-0.19695	0.249602	0.880692	3936
CHOL	LCP1	Gamma_delta	-0.122958	0.474962	0.998432	3936
CHOL	LCP1	InfiltrationScore	-0.154995	0.366727	0.763094	3936
CHOL	LCP1	MAIT	-0.119776	0.486552	0.982675	3936
CHOL	LCP1	Macrophage	-0.0423532	0.806254	0.958507	3936
CHOL	LCP1	Monocyte	0.0541428	0.753808	0.990058	3936
CHOL	LCP1	NK	-0.140715	0.413029	0.949035	3936
CHOL	LCP1	NKT	0.011002	0.949222	0.990869	3936
CHOL	LCP1	Neutrophil	0.114624	0.50562	0.994518	3936
CHOL	LCP1	Tfh	-0.0690925	0.688859	0.998527	3936
CHOL	LCP1	Th1	0.00804531	0.962857	0.993659	3936
CHOL	LCP1	Th17	0.175475	0.305995	0.920612	3936
CHOL	LCP1	Th2	-0.0784781	0.649143	0.994212	3936
CHOL	LCP1	Tr1	0.0251771	0.884115	0.967998	3936
CHOL	LCP1	iTreg	0.0313859	0.855807	0.977941	3936
CHOL	LCP1	nTreg	-0.101648	0.555261	0.950772	3936
CHOL	MMP1	Bcell	-0.196407	0.250937	0.962937	4312
CHOL	MMP1	CD4_T	0.237473	0.163139	0.694126	4312
CHOL	MMP1	CD4_naive	-0.156949	0.360643	0.585956	4312
CHOL	MMP1	CD8_T	-0.20385	0.233062	0.969898	4312
CHOL	MMP1	CD8_naive	-0.298388	0.0771171	0.870107	4312
CHOL	MMP1	Central_memory	0.113535	0.5097	0.757914	4312
CHOL	MMP1	Cytotoxic	0.0652762	0.705253	0.962854	4312
CHOL	MMP1	DC	0.328441	0.0504964	0.97698	4312
CHOL	MMP1	Effector_memory	0.0349661	0.839562	0.994954	4312
CHOL	MMP1	Exhausted	-0.172838	0.313433	0.880692	4312
CHOL	MMP1	Gamma_delta	-0.15415	0.369377	0.922302	4312
CHOL	MMP1	InfiltrationScore	0.0397863	0.817793	0.977089	4312
CHOL	MMP1	MAIT	-0.00579673	0.973233	0.994414	4312
CHOL	MMP1	Macrophage	0.235434	0.166888	0.678796	4312
CHOL	MMP1	Monocyte	0.0690277	0.689136	0.990058	4312
CHOL	MMP1	NK	-0.143381	0.40414	0.949035	4312
CHOL	MMP1	NKT	0.104733	0.543256	0.975042	4312
CHOL	MMP1	Neutrophil	-0.150264	0.381711	0.994518	4312
CHOL	MMP1	Tfh	0.104401	0.544543	0.998527	4312
CHOL	MMP1	Th1	-0.108536	0.528629	0.912635	4312
CHOL	MMP1	Th17	0.0576874	0.738238	0.995447	4312
CHOL	MMP1	Th2	0.298648	0.0768481	0.94425	4312
CHOL	MMP1	Tr1	0.401687	0.0151686	0.341026	4312
CHOL	MMP1	iTreg	0.319422	0.0575674	0.430638	4312
CHOL	MMP1	nTreg	0.182667	0.286276	0.950772	4312
CHOL	MMP10	Bcell	-0.196407	0.250937	0.962937	4319
CHOL	MMP10	CD4_T	0.237473	0.163139	0.694126	4319
CHOL	MMP10	CD4_naive	-0.156949	0.360643	0.585956	4319
CHOL	MMP10	CD8_T	-0.20385	0.233062	0.969898	4319
CHOL	MMP10	CD8_naive	-0.298388	0.0771171	0.870107	4319
CHOL	MMP10	Central_memory	0.113535	0.5097	0.757914	4319
CHOL	MMP10	Cytotoxic	0.0652762	0.705253	0.962854	4319
CHOL	MMP10	DC	0.328441	0.0504964	0.97698	4319
CHOL	MMP10	Effector_memory	0.0349661	0.839562	0.994954	4319
CHOL	MMP10	Exhausted	-0.172838	0.313433	0.880692	4319
CHOL	MMP10	Gamma_delta	-0.15415	0.369377	0.922302	4319
CHOL	MMP10	InfiltrationScore	0.0397863	0.817793	0.977089	4319
CHOL	MMP10	MAIT	-0.00579673	0.973233	0.994414	4319
CHOL	MMP10	Macrophage	0.235434	0.166888	0.678796	4319
CHOL	MMP10	Monocyte	0.0690277	0.689136	0.990058	4319
CHOL	MMP10	NK	-0.143381	0.40414	0.949035	4319
CHOL	MMP10	NKT	0.104733	0.543256	0.975042	4319
CHOL	MMP10	Neutrophil	-0.150264	0.381711	0.994518	4319
CHOL	MMP10	Tfh	0.104401	0.544543	0.998527	4319
CHOL	MMP10	Th1	-0.108536	0.528629	0.912635	4319
CHOL	MMP10	Th17	0.0576874	0.738238	0.995447	4319
CHOL	MMP10	Th2	0.298648	0.0768481	0.94425	4319
CHOL	MMP10	Tr1	0.401687	0.0151686	0.341026	4319
CHOL	MMP10	iTreg	0.319422	0.0575674	0.430638	4319
CHOL	MMP10	nTreg	0.182667	0.286276	0.950772	4319
CHOL	MMP12	Bcell	-0.196407	0.250937	0.962937	4321
CHOL	MMP12	CD4_T	0.237473	0.163139	0.694126	4321
CHOL	MMP12	CD4_naive	-0.156949	0.360643	0.585956	4321
CHOL	MMP12	CD8_T	-0.20385	0.233062	0.969898	4321
CHOL	MMP12	CD8_naive	-0.298388	0.0771171	0.870107	4321
CHOL	MMP12	Central_memory	0.113535	0.5097	0.757914	4321
CHOL	MMP12	Cytotoxic	0.0652762	0.705253	0.962854	4321
CHOL	MMP12	DC	0.328441	0.0504964	0.97698	4321
CHOL	MMP12	Effector_memory	0.0349661	0.839562	0.994954	4321
CHOL	MMP12	Exhausted	-0.172838	0.313433	0.880692	4321
CHOL	MMP12	Gamma_delta	-0.15415	0.369377	0.922302	4321
CHOL	MMP12	InfiltrationScore	0.0397863	0.817793	0.977089	4321
CHOL	MMP12	MAIT	-0.00579673	0.973233	0.994414	4321
CHOL	MMP12	Macrophage	0.235434	0.166888	0.678796	4321
CHOL	MMP12	Monocyte	0.0690277	0.689136	0.990058	4321
CHOL	MMP12	NK	-0.143381	0.40414	0.949035	4321
CHOL	MMP12	NKT	0.104733	0.543256	0.975042	4321
CHOL	MMP12	Neutrophil	-0.150264	0.381711	0.994518	4321
CHOL	MMP12	Tfh	0.104401	0.544543	0.998527	4321
CHOL	MMP12	Th1	-0.108536	0.528629	0.912635	4321
CHOL	MMP12	Th17	0.0576874	0.738238	0.995447	4321
CHOL	MMP12	Th2	0.298648	0.0768481	0.94425	4321
CHOL	MMP12	Tr1	0.401687	0.0151686	0.341026	4321
[truncated: 12,852 more rows]
