# Supplementary material for: Pan-cancer analyses of senescence-related genes in extracellular matrix characterization in cancer
Source: Discov Oncol. 2023 Nov 20;14:208. doi: 10.1007/s12672-023-00828-7 (PMC10660488; doi:10.1007/s12672-023-00828-7)
Supplement: Supplementary file 12 — Supplementary file12 (XLSX 915 KB) [file 12672_2023_828_MOESM12_ESM.xlsx]

## Sheet: SheetName
Table S7 The correlation between gene methylation and immune infiltration in 33 cancers
cancertype	symbol	cell_type	cor	p_value	fdr	entrez
ACC	FGF2	Bcell	-0.0838375	0.462594	0.66632	2247
ACC	FGF2	CD4_T	-0.0149237	0.896141	0.980316	2247
ACC	FGF2	CD4_naive	-0.120689	0.289378	0.529086	2247
ACC	FGF2	CD8_T	-0.0278253	0.807679	0.896178	2247
ACC	FGF2	CD8_naive	-0.0211937	0.852921	0.927089	2247
ACC	FGF2	Central_memory	-0.142776	0.209394	0.988248	2247
ACC	FGF2	Cytotoxic	0.0882335	0.439377	0.627418	2247
ACC	FGF2	DC	0.0866459	0.447685	0.688902	2247
ACC	FGF2	Effector_memory	-0.107287	0.346651	0.797477	2247
ACC	FGF2	Exhausted	-0.0313964	0.783565	0.899951	2247
ACC	FGF2	Gamma_delta	-0.0532867	0.640925	0.844466	2247
ACC	FGF2	InfiltrationScore	0.167874	0.139186	0.324552	2247
ACC	FGF2	MAIT	0.0177471	0.876634	0.946348	2247
ACC	FGF2	Macrophage	0.144358	0.204338	0.465335	2247
ACC	FGF2	Monocyte	0.153515	0.176778	0.997715	2247
ACC	FGF2	NK	0.0860299	0.450932	0.660913	2247
ACC	FGF2	NKT	0.0194536	0.864879	0.948674	2247
ACC	FGF2	Neutrophil	0.0258679	0.820974	0.904238	2247
ACC	FGF2	Tfh	0.0534713	0.639768	0.806272	2247
ACC	FGF2	Th1	-0.0174792	0.878482	0.935672	2247
ACC	FGF2	Th17	0.100719	0.377135	0.659637	2247
ACC	FGF2	Th2	-0.0216098	0.850067	0.925993	2247
ACC	FGF2	Tr1	0.119001	0.296224	0.732467	2247
ACC	FGF2	iTreg	-0.0802716	0.48191	0.669484	2247
ACC	FGF2	nTreg	-0.13199	0.246238	0.546546	2247
ACC	ICAM1	Bcell	0.620242	1.08687e-09	1.42547e-07	3383
ACC	ICAM1	CD4_T	-0.262297	0.019531	0.306351	3383
ACC	ICAM1	CD4_naive	0.358719	0.00116912	0.0150783	3383
ACC	ICAM1	CD8_T	-0.468952	1.3058e-05	0.000207877	3383
ACC	ICAM1	CD8_naive	0.305185	0.00624037	0.0553486	3383
ACC	ICAM1	Central_memory	0.0647831	0.570563	0.996844	3383
ACC	ICAM1	Cytotoxic	-0.50216	2.41508e-06	4.1355e-05	3383
ACC	ICAM1	DC	-0.277698	0.0132183	0.123261	3383
ACC	ICAM1	Effector_memory	-0.15798	0.16437	0.640123	3383
ACC	ICAM1	Exhausted	-0.376132	0.000634988	0.007583	3383
ACC	ICAM1	Gamma_delta	-0.103019	0.366281	0.655102	3383
ACC	ICAM1	InfiltrationScore	-0.45885	2.1091e-05	0.000475043	3383
ACC	ICAM1	MAIT	-0.253023	0.0244605	0.124903	3383
ACC	ICAM1	Macrophage	-0.455433	2.4721e-05	0.000722978	3383
ACC	ICAM1	Monocyte	-0.110799	0.330998	0.997715	3383
ACC	ICAM1	NK	-0.401448	0.000245608	0.0040617	3383
ACC	ICAM1	NKT	-0.275493	0.0139964	0.104118	3383
ACC	ICAM1	Neutrophil	0.505137	2.05785e-06	4.6197e-05	3383
ACC	ICAM1	Tfh	-0.422174	0.000106458	0.00156205	3383
ACC	ICAM1	Th1	-0.524484	7.00116e-07	1.5462e-05	3383
ACC	ICAM1	Th17	0.222777	0.0484503	0.240839	3383
ACC	ICAM1	Th2	-0.383809	0.000479879	0.00512332	3383
ACC	ICAM1	Tr1	-0.0764477	0.503092	0.844015	3383
ACC	ICAM1	iTreg	-0.396375	0.000298929	0.00504128	3383
ACC	ICAM1	nTreg	-0.200756	0.0760588	0.31514	3383
ACC	ICAM3	Bcell	0.607204	2.97953e-09	2.79395e-07	3385
ACC	ICAM3	CD4_T	-0.235006	0.0370891	0.387957	3385
ACC	ICAM3	CD4_naive	0.511825	1.42822e-06	0.000341863	3385
ACC	ICAM3	CD8_T	-0.62983	5.02325e-10	1.12693e-07	3385
ACC	ICAM3	CD8_naive	0.501223	2.53912e-06	0.000859958	3385
ACC	ICAM3	Central_memory	0.121677	0.285418	0.993899	3385
ACC	ICAM3	Cytotoxic	-0.638607	2.42054e-10	3.3553e-08	3385
ACC	ICAM3	DC	-0.364684	0.000952134	0.0354128	3385
ACC	ICAM3	Effector_memory	-0.296634	0.0079415	0.214063	3385
ACC	ICAM3	Exhausted	-0.554873	1.11782e-07	1.6279e-05	3385
ACC	ICAM3	Gamma_delta	-0.147382	0.194918	0.493957	3385
ACC	ICAM3	InfiltrationScore	-0.602159	4.34864e-09	7.26385e-07	3385
ACC	ICAM3	MAIT	-0.467254	1.4169e-05	0.000598328	3385
ACC	ICAM3	Macrophage	-0.495782	3.38617e-06	0.000149571	3385
ACC	ICAM3	Monocyte	0.0984924	0.387825	0.997715	3385
ACC	ICAM3	NK	-0.594651	7.54306e-09	1.6076e-05	3385
ACC	ICAM3	NKT	-0.319297	0.00412788	0.0489772	3385
ACC	ICAM3	Neutrophil	0.622425	9.1378e-10	1.58979e-07	3385
ACC	ICAM3	Tfh	-0.583164	1.70536e-08	2.2716e-06	3385
ACC	ICAM3	Th1	-0.693774	1.36108e-12	8.92554e-10	3385
ACC	ICAM3	Th17	0.307732	0.00580014	0.0873599	3385
ACC	ICAM3	Th2	-0.626186	6.75658e-10	1.0264e-06	3385
ACC	ICAM3	Tr1	-0.0418819	0.714005	0.923096	3385
ACC	ICAM3	iTreg	-0.508458	1.71823e-06	0.000290058	3385
ACC	ICAM3	nTreg	-0.356213	0.00127296	0.0589783	3385
ACC	ITGA2	Bcell	-0.0284368	0.803536	0.901012	3673
ACC	ITGA2	CD4_T	-0.047997	0.67445	0.91662	3673
ACC	ITGA2	CD4_naive	0.13547	0.233893	0.468171	3673
ACC	ITGA2	CD8_T	0.0817109	0.474063	0.656077	3673
ACC	ITGA2	CD8_naive	0.000316506	0.997791	0.999074	3673
ACC	ITGA2	Central_memory	0.0140945	0.901882	0.999369	3673
ACC	ITGA2	Cytotoxic	0.0804679	0.480836	0.665119	3673
ACC	ITGA2	DC	-0.11356	0.319016	0.584674	3673
ACC	ITGA2	Effector_memory	0.0917805	0.421131	0.835133	3673
ACC	ITGA2	Exhausted	-0.128181	0.260253	0.50043	3673
ACC	ITGA2	Gamma_delta	0.24967	0.0264859	0.172988	3673
ACC	ITGA2	InfiltrationScore	-0.0395004	0.729624	0.856283	3673
ACC	ITGA2	MAIT	0.149377	0.188875	0.42608	3673
ACC	ITGA2	Macrophage	0.0212155	0.852772	0.936358	3673
ACC	ITGA2	Monocyte	-0.12884	0.257792	0.997715	3673
ACC	ITGA2	NK	0.0476889	0.676423	0.825083	3673
ACC	ITGA2	NKT	0.214208	0.0580069	0.24744	3673
ACC	ITGA2	Neutrophil	-0.138433	0.223727	0.400478	3673
ACC	ITGA2	Tfh	0.032668	0.775025	0.889544	3673
ACC	ITGA2	Th1	0.135098	0.235191	0.416582	3673
ACC	ITGA2	Th17	-0.187378	0.0982115	0.342248	3673
ACC	ITGA2	Th2	0.052495	0.6459	0.806134	3673
ACC	ITGA2	Tr1	-0.0315611	0.782457	0.942802	3673
ACC	ITGA2	iTreg	-0.110192	0.333672	0.534189	3673
ACC	ITGA2	nTreg	0.108709	0.340256	0.634584	3673
ACC	LCP1	Bcell	0.692417	1.5675e-12	1.78849e-09	3936
ACC	LCP1	CD4_T	-0.405728	0.000207581	0.126319	3936
ACC	LCP1	CD4_naive	0.452908	2.7768e-05	0.0014523	3936
ACC	LCP1	CD8_T	-0.621553	9.79508e-10	1.75796e-07	3936
ACC	LCP1	CD8_naive	0.390288	0.000376848	0.0102313	3936
ACC	LCP1	Central_memory	0.153995	0.175412	0.985387	3936
ACC	LCP1	Cytotoxic	-0.620787	1.04093e-09	9.39036e-08	3936
ACC	LCP1	DC	-0.388799	0.000398556	0.0238435	3936
ACC	LCP1	Effector_memory	-0.377793	0.000597987	0.106205	3936
ACC	LCP1	Exhausted	-0.569653	4.27908e-08	9.54486e-06	3936
ACC	LCP1	Gamma_delta	-0.227975	0.0433125	0.224666	3936
ACC	LCP1	InfiltrationScore	-0.679127	6.00691e-12	1.42061e-08	3936
ACC	LCP1	MAIT	-0.559555	8.28796e-08	1.7025e-05	3936
ACC	LCP1	Macrophage	-0.649525	9.44224e-11	6.43961e-08	3936
ACC	LCP1	Monocyte	0.0805979	0.480125	0.997715	3936
ACC	LCP1	NK	-0.504227	2.16145e-06	0.000226091	3936
ACC	LCP1	NKT	-0.379472	0.000562613	0.0168811	3936
ACC	LCP1	Neutrophil	0.618335	1.26322e-09	1.99426e-07	3936
ACC	LCP1	Tfh	-0.553275	1.23669e-07	8.78563e-06	3936
ACC	LCP1	Th1	-0.597602	6.08499e-09	3.39049e-07	3936
ACC	LCP1	Th17	0.208741	0.0648696	0.28022	3936
ACC	LCP1	Th2	-0.551374	1.3937e-07	2.2002e-05	3936
ACC	LCP1	Tr1	0.0727102	0.524252	0.853556	3936
ACC	LCP1	iTreg	-0.403361	0.000227887	0.00429334	3936
ACC	LCP1	nTreg	-0.238559	0.0342397	0.21447	3936
ACC	MMP1	Bcell	0.0788221	0.489883	0.689207	4312
ACC	MMP1	CD4_T	0.0324159	0.776716	0.948844	4312
ACC	MMP1	CD4_naive	0.163397	0.150193	0.357254	4312
ACC	MMP1	CD8_T	-0.179757	0.112924	0.25037	4312
ACC	MMP1	CD8_naive	0.106991	0.347989	0.572924	4312
ACC	MMP1	Central_memory	-0.0717873	0.529545	0.996844	4312
ACC	MMP1	Cytotoxic	-0.238981	0.0339138	0.104187	4312
ACC	MMP1	DC	-0.0577233	0.613348	0.800611	4312
ACC	MMP1	Effector_memory	-0.217022	0.0547123	0.451304	4312
ACC	MMP1	Exhausted	-0.332172	0.00278279	0.0225292	4312
ACC	MMP1	Gamma_delta	-0.188835	0.0955778	0.343508	4312
ACC	MMP1	InfiltrationScore	-0.0753612	0.509197	0.708257	4312
ACC	MMP1	MAIT	-0.176558	0.119584	0.33283	4312
ACC	MMP1	Macrophage	-0.119832	0.292843	0.55975	4312
ACC	MMP1	Monocyte	0.124908	0.272723	0.997715	4312
ACC	MMP1	NK	-0.140815	0.215783	0.42915	4312
ACC	MMP1	NKT	-0.212795	0.0597213	0.25173	4312
ACC	MMP1	Neutrophil	0.230718	0.0407893	0.121946	4312
ACC	MMP1	Tfh	-0.154463	0.174087	0.372888	4312
ACC	MMP1	Th1	-0.167147	0.140929	0.291942	4312
ACC	MMP1	Th17	0.236167	0.0361373	0.206136	4312
ACC	MMP1	Th2	-0.151622	0.182238	0.373771	4312
ACC	MMP1	Tr1	0.102415	0.369112	0.774377	4312
ACC	MMP1	iTreg	-0.134742	0.236441	0.429871	4312
ACC	MMP1	nTreg	-0.0740975	0.516346	0.763745	4312
ACC	MMP10	Bcell	-0.261105	0.0201128	0.0759183	4319
ACC	MMP10	CD4_T	0.337062	0.00238517	0.194884	4319
ACC	MMP10	CD4_naive	-0.0457969	0.688586	0.840683	4319
ACC	MMP10	CD8_T	0.203943	0.0714218	0.181482	4319
ACC	MMP10	CD8_naive	-0.133322	0.241462	0.464359	4319
ACC	MMP10	Central_memory	-0.0850093	0.456341	0.996844	4319
ACC	MMP10	Cytotoxic	0.268011	0.0169389	0.0613051	4319
ACC	MMP10	DC	0.182324	0.107789	0.338006	4319
ACC	MMP10	Effector_memory	0.12297	0.28029	0.749789	4319
ACC	MMP10	Exhausted	0.171039	0.131778	0.330307	4319
ACC	MMP10	Gamma_delta	0.219745	0.051671	0.246748	4319
ACC	MMP10	InfiltrationScore	0.368857	0.000822824	0.00834572	4319
ACC	MMP10	MAIT	0.247668	0.0277617	0.1347	4319
ACC	MMP10	Macrophage	0.333897	0.0026362	0.0277624	4319
ACC	MMP10	Monocyte	0.129388	0.255757	0.997715	4319
ACC	MMP10	NK	0.202136	0.0740217	0.218389	4319
ACC	MMP10	NKT	0.106258	0.351323	0.645898	4319
ACC	MMP10	Neutrophil	-0.300738	0.00708	0.0327227	4319
ACC	MMP10	Tfh	0.273919	0.0145755	0.0686308	4319
ACC	MMP10	Th1	0.276599	0.0136011	0.0525942	4319
ACC	MMP10	Th17	-0.0211809	0.853009	0.939887	4319
ACC	MMP10	Th2	0.15222	0.180502	0.371237	4319
ACC	MMP10	Tr1	0.142013	0.211864	0.667223	4319
ACC	MMP10	iTreg	0.143179	0.208096	0.395677	4319
ACC	MMP10	nTreg	0.0263114	0.817957	0.926013	4319
ACC	MMP12	Bcell	-0.00686574	0.952114	0.979577	4321
ACC	MMP12	CD4_T	0.100352	0.378885	0.795217	4321
ACC	MMP12	CD4_naive	0.0906076	0.427116	0.657072	4321
ACC	MMP12	CD8_T	-0.0149594	0.895894	0.946288	4321
ACC	MMP12	CD8_naive	-0.0573484	0.615659	0.781025	4321
ACC	MMP12	Central_memory	0.0571153	0.617097	0.996844	4321
ACC	MMP12	Cytotoxic	-0.111043	0.329927	0.522501	4321
ACC	MMP12	DC	0.0626046	0.583616	0.780811	4321
ACC	MMP12	Effector_memory	-0.0550201	0.630091	0.920096	4321
ACC	MMP12	Exhausted	-0.181337	0.10974	0.292584	4321
ACC	MMP12	Gamma_delta	0.0308983	0.786916	0.915768	4321
ACC	MMP12	InfiltrationScore	0.110626	0.331761	0.549071	4321
ACC	MMP12	MAIT	0.0728871	0.52324	0.742757	4321
ACC	MMP12	Macrophage	0.0292854	0.797796	0.912425	4321
ACC	MMP12	Monocyte	0.0313944	0.783578	0.997715	4321
ACC	MMP12	NK	-0.020412	0.858289	0.93236	4321
ACC	MMP12	NKT	-0.137868	0.225642	0.523499	4321
ACC	MMP12	Neutrophil	0.128768	0.258062	0.440656	4321
ACC	MMP12	Tfh	0.0444961	0.696996	0.842272	4321
ACC	MMP12	Th1	-0.0728379	0.523521	0.697058	4321
ACC	MMP12	Th17	0.0530496	0.642414	0.835608	4321
ACC	MMP12	Th2	-0.00988471	0.931102	0.96886	4321
ACC	MMP12	Tr1	-0.0661757	0.56229	0.868235	4321
ACC	MMP12	iTreg	-0.121847	0.284741	0.484273	4321
ACC	MMP12	nTreg	-0.16414	0.148323	0.431701	4321
ACC	MMP13	Bcell	0.0971916	0.394154	0.608284	4322
ACC	MMP13	CD4_T	0.15194	0.181314	0.661546	4322
ACC	MMP13	CD4_naive	0.0124712	0.913136	0.962568	4322
ACC	MMP13	CD8_T	-0.0243806	0.831111	0.909644	4322
ACC	MMP13	CD8_naive	0.132044	0.246044	0.468721	4322
ACC	MMP13	Central_memory	-0.22459	0.0466037	0.984958	4322
ACC	MMP13	Cytotoxic	-0.0680283	0.551374	0.722429	4322
ACC	MMP13	DC	-0.149019	0.189948	0.451424	4322
ACC	MMP13	Effector_memory	-0.0982266	0.389113	0.817574	4322
ACC	MMP13	Exhausted	-0.0431639	0.705646	0.857172	4322
ACC	MMP13	Gamma_delta	0.0232041	0.839148	0.937091	4322
ACC	MMP13	InfiltrationScore	-0.103602	0.363559	0.581362	4322
ACC	MMP13	MAIT	0.0507702	0.65679	0.829624	4322
ACC	MMP13	Macrophage	-0.191852	0.0903008	0.295582	4322
ACC	MMP13	Monocyte	-0.112698	0.322725	0.997715	4322
ACC	MMP13	NK	0.0176247	0.877478	0.943257	4322
ACC	MMP13	NKT	-0.170672	0.132621	0.393249	4322
ACC	MMP13	Neutrophil	0.0912256	0.423956	0.609931	4322
ACC	MMP13	Tfh	-0.0432594	0.705024	0.846526	4322
ACC	MMP13	Th1	-0.169424	0.13552	0.283756	4322
ACC	MMP13	Th17	0.164907	0.146412	0.414258	4322
ACC	MMP13	Th2	0.0838799	0.462368	0.66933	4322
ACC	MMP13	Tr1	-0.155509	0.171154	0.634063	4322
ACC	MMP13	iTreg	-0.135004	0.23552	0.429064	4322
ACC	MMP13	nTreg	-0.117888	0.300798	0.600539	4322
ACC	MMP14	Bcell	-0.453577	2.6929e-05	0.000408844	4323
ACC	MMP14	CD4_T	0.333094	0.00270358	0.194884	4323
ACC	MMP14	CD4_naive	-0.48879	4.86696e-06	0.00059042	4323
ACC	MMP14	CD8_T	0.598231	5.81095e-09	6.23124e-07	4323
ACC	MMP14	CD8_naive	-0.268202	0.0168577	0.102982	4323
ACC	MMP14	Central_memory	-0.0377123	0.741423	0.997418	4323
ACC	MMP14	Cytotoxic	0.606315	3.18645e-09	2.13055e-07	4323
ACC	MMP14	DC	0.132781	0.243395	0.510315	4323
ACC	MMP14	Effector_memory	0.203381	0.0722214	0.495175	4323
ACC	MMP14	Exhausted	0.391242	0.000363518	0.00487262	4323
ACC	MMP14	Gamma_delta	0.0701481	0.539011	0.783206	4323
ACC	MMP14	InfiltrationScore	0.345948	0.00179094	0.0153214	4323
ACC	MMP14	MAIT	0.40901	0.000182185	0.00399774	4323
ACC	MMP14	Macrophage	0.260635	0.0203461	0.117954	4323
ACC	MMP14	Monocyte	-0.351096	0.00151126	0.997715	4323
ACC	MMP14	NK	0.384323	0.000470861	0.00634639	4323
ACC	MMP14	NKT	0.509483	1.6245e-06	0.0016215	4323
ACC	MMP14	Neutrophil	-0.518004	1.01211e-06	2.6589e-05	4323
ACC	MMP14	Tfh	0.588184	1.19862e-08	1.76177e-06	4323
ACC	MMP14	Th1	0.593366	8.27651e-09	4.34199e-07	4323
ACC	MMP14	Th17	-0.243361	0.0306823	0.190572	4323
ACC	MMP14	Th2	0.459608	2.0356e-05	0.000485422	4323
ACC	MMP14	Tr1	0.069046	0.545422	0.862337	4323
ACC	MMP14	iTreg	0.403424	0.000227328	0.00429229	4323
ACC	MMP14	nTreg	0.280556	0.0122656	0.139739	4323
ACC	MMP2	Bcell	0.184365	0.103838	0.252199	4313
ACC	MMP2	CD4_T	0.0187338	0.869834	0.973207	4313
ACC	MMP2	CD4_naive	0.103442	0.364303	0.600754	4313
ACC	MMP2	CD8_T	-0.304776	0.00631373	0.0301305	4313
ACC	MMP2	CD8_naive	-0.122463	0.282293	0.506429	4313
ACC	MMP2	Central_memory	-0.0715907	0.530676	0.996844	4313
ACC	MMP2	Cytotoxic	-0.247404	0.0279332	0.0901838	4313
ACC	MMP2	DC	0.120584	0.289802	0.557312	4313
ACC	MMP2	Effector_memory	-0.00930113	0.93516	0.989357	4313
ACC	MMP2	Exhausted	-0.135443	0.233989	0.471462	4313
ACC	MMP2	Gamma_delta	-0.247235	0.0280441	0.178016	4313
ACC	MMP2	InfiltrationScore	0.020085	0.860536	0.930946	4313
ACC	MMP2	MAIT	-0.223554	0.0476512	0.190538	4313
ACC	MMP2	Macrophage	0.0380248	0.739357	0.880775	4313
ACC	MMP2	Monocyte	0.221367	0.0499265	0.997715	4313
ACC	MMP2	NK	-0.212385	0.0602271	0.18988	4313
ACC	MMP2	NKT	-0.196192	0.0831163	0.30589	4313
ACC	MMP2	Neutrophil	0.356479	0.00126156	0.0085491	4313
ACC	MMP2	Tfh	-0.189764	0.0939286	0.248023	4313
ACC	MMP2	Th1	-0.16548	0.144994	0.297706	4313
ACC	MMP2	Th17	-0.0154596	0.892433	0.958306	4313
ACC	MMP2	Th2	-0.256393	0.0225593	0.0884626	4313
ACC	MMP2	Tr1	0.19286	0.0885908	0.537431	4313
ACC	MMP2	iTreg	-0.0225967	0.843305	0.914653	4313
ACC	MMP2	nTreg	-0.157324	0.16615	0.454737	4313
ACC	MMP3	Bcell	0.0870513	0.445555	0.654344	4314
ACC	MMP3	CD4_T	-0.104661	0.358648	0.786287	4314
ACC	MMP3	CD4_naive	0.150822	0.184583	0.405194	4314
ACC	MMP3	CD8_T	-0.130216	0.252699	0.437368	4314
ACC	MMP3	CD8_naive	-0.0453942	0.691186	0.829034	4314
ACC	MMP3	Central_memory	0.0830432	0.46686	0.996844	4314
ACC	MMP3	Cytotoxic	-0.198681	0.0792065	0.192484	4314
ACC	MMP3	DC	0.0635906	0.577691	0.776785	4314
ACC	MMP3	Effector_memory	-0.093595	0.411969	0.83017	4314
ACC	MMP3	Exhausted	-0.304547	0.00635506	0.0413564	4314
ACC	MMP3	Gamma_delta	-0.116106	0.308215	0.605632	4314
ACC	MMP3	InfiltrationScore	0.0236029	0.836422	0.917992	4314
ACC	MMP3	MAIT	-0.0498695	0.662506	0.833448	4314
ACC	MMP3	Macrophage	-0.0735421	0.519503	0.747319	4314
ACC	MMP3	Monocyte	0.033476	0.769614	0.997715	4314
ACC	MMP3	NK	-0.0280437	0.806199	0.906468	4314
ACC	MMP3	NKT	-0.194548	0.0857832	0.311258	4314
ACC	MMP3	Neutrophil	0.227382	0.0438747	0.128533	4314
ACC	MMP3	Tfh	-0.141557	0.213348	0.42327	4314
ACC	MMP3	Th1	-0.207315	0.0667637	0.170816	4314
ACC	MMP3	Th17	0.204493	0.0706441	0.291925	4314
ACC	MMP3	Th2	-0.118409	0.298651	0.513979	4314
ACC	MMP3	Tr1	-0.0762522	0.504188	0.84414	4314
ACC	MMP3	iTreg	-0.0212071	0.852829	0.920592	4314
ACC	MMP3	nTreg	-0.0249507	0.827222	0.930352	4314
ACC	MMP9	Bcell	0.548651	1.65189e-07	6.18583e-06	4318
ACC	MMP9	CD4_T	-0.209821	0.0634648	0.463019	4318
ACC	MMP9	CD4_naive	0.411134	0.000167304	0.00430246	4318
ACC	MMP9	CD8_T	-0.508438	1.72005e-06	4.0451e-05	4318
ACC	MMP9	CD8_naive	0.314035	0.00482659	0.0476025	4318
ACC	MMP9	Central_memory	0.103675	0.363218	0.996844	4318
ACC	MMP9	Cytotoxic	-0.511168	1.48095e-06	2.7584e-05	4318
ACC	MMP9	DC	-0.227083	0.0441606	0.216175	4318
ACC	MMP9	Effector_memory	-0.169463	0.135428	0.602253	4318
ACC	MMP9	Exhausted	-0.492656	3.98646e-06	0.000161831	4318
ACC	MMP9	Gamma_delta	0.0828337	0.467989	0.731702	4318
ACC	MMP9	InfiltrationScore	-0.416647	0.000133756	0.00207699	4318
ACC	MMP9	MAIT	-0.272925	0.0149522	0.0910804	4318
ACC	MMP9	Macrophage	-0.346678	0.00174866	0.0206045	4318
ACC	MMP9	Monocyte	0.120392	0.290576	0.997715	4318
ACC	MMP9	NK	-0.460932	1.9131e-05	0.000772939	4318
ACC	MMP9	NKT	-0.353392	0.00139974	0.0267852	4318
ACC	MMP9	Neutrophil	0.502082	2.4253e-06	5.2644e-05	4318
ACC	MMP9	Tfh	-0.434468	6.3158e-05	0.00102557	4318
ACC	MMP9	Th1	-0.570264	4.10847e-08	1.49041e-06	4318
ACC	MMP9	Th17	0.131175	0.249191	0.538793	4318
ACC	MMP9	Th2	-0.463338	1.7077e-05	0.000423197	4318
ACC	MMP9	Tr1	0.0710979	0.533516	0.856991	4318
ACC	MMP9	iTreg	-0.443697	4.211e-05	0.00151152	4318
ACC	MMP9	nTreg	-0.275249	0.0140846	0.149167	4318
ACC	PECAM1	Bcell	0.310918	0.00528816	0.0278711	5175
ACC	PECAM1	CD4_T	0.0222882	0.845417	0.967888	5175
ACC	PECAM1	CD4_naive	0.228089	0.0432051	0.16454	5175
ACC	PECAM1	CD8_T	-0.388166	0.000408113	0.00341932	5175
ACC	PECAM1	CD8_naive	0.199155	0.0784777	0.250055	5175
ACC	PECAM1	Central_memory	-0.116959	0.304652	0.993899	5175
ACC	PECAM1	Cytotoxic	-0.384593	0.000466179	0.00338084	5175
ACC	PECAM1	DC	-0.137479	0.226965	0.493088	5175
ACC	PECAM1	Effector_memory	-0.0876819	0.442254	0.843731	5175
ACC	PECAM1	Exhausted	-0.201089	0.075564	0.23118	5175
ACC	PECAM1	Gamma_delta	-0.13259	0.244079	0.54786	5175
ACC	PECAM1	InfiltrationScore	-0.257392	0.0220205	0.0966656	5175
ACC	PECAM1	MAIT	-0.269164	0.0164536	0.0966361	5175
ACC	PECAM1	Macrophage	-0.239517	0.0335039	0.160687	5175
ACC	PECAM1	Monocyte	0.0130252	0.909293	0.997715	5175
ACC	PECAM1	NK	-0.300204	0.00718719	0.0440797	5175
ACC	PECAM1	NKT	-0.382603	0.000501702	0.0160488	5175
ACC	PECAM1	Neutrophil	0.341299	0.00208278	0.0126962	5175
ACC	PECAM1	Tfh	-0.328003	0.00316759	0.022207	5175
ACC	PECAM1	Th1	-0.401984	0.000240521	0.00209229	5175
ACC	PECAM1	Th17	0.25075	0.0258184	0.176485	5175
ACC	PECAM1	Th2	-0.31798	0.00429362	0.026524	5175
ACC	PECAM1	Tr1	-0.0174539	0.878657	0.967953	5175
ACC	PECAM1	iTreg	-0.213649	0.0586812	0.175007	5175
ACC	PECAM1	nTreg	-0.210887	0.0621014	0.285543	5175
ACC	SERPINE1	Bcell	0.273096	0.0148868	0.060592	5054
ACC	SERPINE1	CD4_T	-0.132074	0.245936	0.717576	5054
ACC	SERPINE1	CD4_naive	0.0176751	0.877131	0.94668	5054
ACC	SERPINE1	CD8_T	-0.0499175	0.6622	0.802282	5054
ACC	SERPINE1	CD8_naive	0.180262	0.111898	0.304642	5054
ACC	SERPINE1	Central_memory	-0.0161097	0.887938	0.999369	5054
ACC	SERPINE1	Cytotoxic	-0.0885621	0.437668	0.625869	5054
ACC	SERPINE1	DC	-0.180145	0.112135	0.344549	5054
ACC	SERPINE1	Effector_memory	0.0110269	0.923164	0.98678	5054
ACC	SERPINE1	Exhausted	-0.156039	0.169682	0.386336	5054
ACC	SERPINE1	Gamma_delta	0.141514	0.213491	0.513982	5054
ACC	SERPINE1	InfiltrationScore	-0.149177	0.189476	0.3933	5054
ACC	SERPINE1	MAIT	0.0225672	0.843507	0.929356	5054
ACC	SERPINE1	Macrophage	-0.148484	0.191562	0.448892	5054
ACC	SERPINE1	Monocyte	-0.02532	0.824705	0.997715	5054
ACC	SERPINE1	NK	-0.173107	0.127104	0.308004	5054
ACC	SERPINE1	NKT	-0.0555346	0.626889	0.835006	5054
ACC	SERPINE1	Neutrophil	0.047524	0.67748	0.809349	5054
ACC	SERPINE1	Tfh	-0.0594343	0.602852	0.779248	5054
ACC	SERPINE1	Th1	-0.114625	0.314469	0.502314	5054
ACC	SERPINE1	Th17	-0.282083	0.0117816	0.118631	5054
ACC	SERPINE1	Th2	-0.177547	0.117493	0.277306	5054
ACC	SERPINE1	Tr1	0.19496	0.0851075	0.531906	5054
ACC	SERPINE1	iTreg	-0.248439	0.0272643	0.104439	5054
ACC	SERPINE1	nTreg	-0.0693474	0.543665	0.781002	5054
ACC	SPP1	Bcell	0.332575	0.00274795	0.016757	6696
ACC	SPP1	CD4_T	-0.251829	0.0251662	0.338661	6696
ACC	SPP1	CD4_naive	0.346676	0.00174877	0.019926	6696
ACC	SPP1	CD8_T	-0.313503	0.00490269	0.024753	6696
ACC	SPP1	CD8_naive	0.309993	0.00543251	0.0510327	6696
ACC	SPP1	Central_memory	0.126125	0.268039	0.993899	6696
ACC	SPP1	Cytotoxic	-0.307302	0.00587243	0.0265725	6696
ACC	SPP1	DC	-0.181082	0.110249	0.341338	6696
ACC	SPP1	Effector_memory	-0.261751	0.0197956	0.306937	6696
ACC	SPP1	Exhausted	-0.401393	0.000246135	0.00364289	6696
ACC	SPP1	Gamma_delta	-0.171742	0.130174	0.40164	6696
ACC	SPP1	InfiltrationScore	-0.214045	0.0582032	0.185177	6696
ACC	SPP1	MAIT	-0.110195	0.333659	0.587911	6696
ACC	SPP1	Macrophage	-0.29076	0.00933419	0.0693455	6696
ACC	SPP1	Monocyte	0.113161	0.32073	0.997715	6696
ACC	SPP1	NK	-0.168067	0.138724	0.326265	6696
ACC	SPP1	NKT	-0.4281	8.2979e-05	0.00727622	6696
ACC	SPP1	Neutrophil	0.300859	0.00705575	0.0326372	6696
ACC	SPP1	Tfh	-0.360928	0.00108403	0.00975855	6696
ACC	SPP1	Th1	-0.47565	9.42196e-06	0.000137151	6696
ACC	SPP1	Th17	0.178017	0.11651	0.369603	6696
ACC	SPP1	Th2	-0.217537	0.0541268	0.16386	6696
ACC	SPP1	Tr1	-0.109487	0.336794	0.754876	6696
ACC	SPP1	iTreg	-0.388401	0.000404545	0.00616687	6696
ACC	SPP1	nTreg	-0.272268	0.0152054	0.153322	6696
ACC	TIMP2	Bcell	0.158752	0.162291	0.342162	7077
ACC	TIMP2	CD4_T	-0.0820806	0.472058	0.842814	7077
ACC	TIMP2	CD4_naive	0.257055	0.0222012	0.107081	7077
ACC	TIMP2	CD8_T	-0.173963	0.125205	0.269607	7077
ACC	TIMP2	CD8_naive	0.398858	0.000271631	0.0085924	7077
ACC	TIMP2	Central_memory	0.17937	0.113713	0.984958	7077
ACC	TIMP2	Cytotoxic	-0.236535	0.0358399	0.108384	7077
ACC	TIMP2	DC	-0.182166	0.1081	0.338184	7077
ACC	TIMP2	Effector_memory	0.0116106	0.91911	0.986283	7077
ACC	TIMP2	Exhausted	-0.217668	0.0539777	0.183367	7077
ACC	TIMP2	Gamma_delta	0.308618	0.00565358	0.0713472	7077
ACC	TIMP2	InfiltrationScore	-0.286229	0.0105502	0.0569066	7077
ACC	TIMP2	MAIT	-0.0250747	0.826377	0.92162	7077
ACC	TIMP2	Macrophage	-0.236803	0.0356247	0.167651	7077
ACC	TIMP2	Monocyte	0.0823874	0.470398	0.997715	7077
ACC	TIMP2	NK	-0.257992	0.021702	0.0954886	7077
ACC	TIMP2	NKT	-0.171062	0.131725	0.39207	7077
ACC	TIMP2	Neutrophil	0.102632	0.368093	0.555987	7077
ACC	TIMP2	Tfh	-0.284205	0.0111367	0.0563613	7077
ACC	TIMP2	Th1	-0.230576	0.0409163	0.120176	7077
ACC	TIMP2	Th17	0.0888015	0.436425	0.701161	7077
ACC	TIMP2	Th2	-0.125344	0.271038	0.483945	7077
ACC	TIMP2	Tr1	-0.207187	0.0669368	0.493931	7077
ACC	TIMP2	iTreg	-0.329374	0.0030361	0.0234309	7077
ACC	TIMP2	nTreg	-0.0688649	0.546478	0.782125	7077
ACC	TNF	Bcell	0.428963	7.9992e-05	0.00100654	7124
ACC	TNF	CD4_T	-0.254738	0.0234765	0.330806	7124
ACC	TNF	CD4_naive	0.427576	8.4842e-05	0.0027345	7124
ACC	TNF	CD8_T	-0.37726	0.000609642	0.00472473	7124
ACC	TNF	CD8_naive	0.400769	0.000252198	0.00834517	7124
ACC	TNF	Central_memory	-0.0175106	0.878265	0.999369	7124
ACC	TNF	Cytotoxic	-0.493592	3.79709e-06	6.1133e-05	7124
ACC	TNF	DC	-0.278172	0.0130558	0.122578	7124
ACC	TNF	Effector_memory	-0.156178	0.169298	0.645027	7124
ACC	TNF	Exhausted	-0.361915	0.00104784	0.0110692	7124
ACC	TNF	Gamma_delta	0.0963349	0.398355	0.680012	7124
ACC	TNF	InfiltrationScore	-0.379703	0.000557897	0.00623338	7124
ACC	TNF	MAIT	-0.255178	0.0232299	0.120937	7124
ACC	TNF	Macrophage	-0.335991	0.00246764	0.0262958	7124
ACC	TNF	Monocyte	0.0568118	0.618972	0.997715	7124
ACC	TNF	NK	-0.346956	0.0017328	0.0162064	7124
ACC	TNF	NKT	-0.383602	0.000483574	0.0157346	7124
ACC	TNF	Neutrophil	0.419523	0.000118834	0.00126792	7124
ACC	TNF	Tfh	-0.410261	0.000173282	0.00229919	7124
ACC	TNF	Th1	-0.552188	1.3243e-07	3.84002e-06	7124
ACC	TNF	Th17	0.290263	0.00946126	0.107938	7124
ACC	TNF	Th2	-0.363906	0.000978203	0.00881426	7124
ACC	TNF	Tr1	-0.137493	0.226917	0.680552	7124
ACC	TNF	iTreg	-0.479013	7.97697e-06	0.000690337	7124
ACC	TNF	nTreg	-0.306101	0.00607873	0.106958	7124
ACC	TNFRSF11B	Bcell	-0.134527	0.237195	0.441793	4982
ACC	TNFRSF11B	CD4_T	0.387421	0.000419651	0.150622	4982
ACC	TNFRSF11B	CD4_naive	-0.00345196	0.975913	0.990318	4982
ACC	TNFRSF11B	CD8_T	0.102476	0.368822	0.560116	4982
ACC	TNFRSF11B	CD8_naive	-0.201833	0.074465	0.243504	4982
ACC	TNFRSF11B	Central_memory	-0.0428242	0.707858	0.997418	4982
ACC	TNFRSF11B	Cytotoxic	0.190586	0.0924861	0.215128	4982
ACC	TNFRSF11B	DC	0.135568	0.233552	0.501077	4982
ACC	TNFRSF11B	Effector_memory	0.0616311	0.589493	0.908629	4982
ACC	TNFRSF11B	Exhausted	0.0570865	0.617275	0.801381	4982
ACC	TNFRSF11B	Gamma_delta	-0.0450204	0.693602	0.873053	4982
ACC	TNFRSF11B	InfiltrationScore	0.246193	0.0287341	0.115546	4982
ACC	TNFRSF11B	MAIT	0.0280934	0.805862	0.912589	4982
ACC	TNFRSF11B	Macrophage	0.149251	0.189253	0.445993	4982
ACC	TNFRSF11B	Monocyte	0.0184057	0.872094	0.997715	4982
ACC	TNFRSF11B	NK	0.224057	0.0471402	0.161048	4982
ACC	TNFRSF11B	NKT	0.245344	0.0293071	0.164154	4982
ACC	TNFRSF11B	Neutrophil	-0.170509	0.132997	0.281374	4982
ACC	TNFRSF11B	Tfh	0.171936	0.129735	0.307262	4982
ACC	TNFRSF11B	Th1	0.211089	0.0618465	0.161855	4982
ACC	TNFRSF11B	Th17	-0.0720759	0.527887	0.762816	4982
ACC	TNFRSF11B	Th2	0.16971	0.134852	0.304815	4982
ACC	TNFRSF11B	Tr1	0.108082	0.343067	0.759302	4982
ACC	TNFRSF11B	iTreg	0.265853	0.0178811	0.0785753	4982
ACC	TNFRSF11B	nTreg	0.118816	0.296983	0.596977	4982
BLCA	FGF2	Bcell	-0.0417587	0.39962	0.701703	2247
BLCA	FGF2	CD4_T	-0.0799744	0.106306	0.23077	2247
BLCA	FGF2	CD4_naive	0.0144128	0.771354	0.852886	2247
BLCA	FGF2	CD8_T	0.046445	0.348798	0.544934	2247
BLCA	FGF2	CD8_naive	0.0574771	0.246129	0.336545	2247
BLCA	FGF2	Central_memory	0.0263572	0.595071	0.712005	2247
BLCA	FGF2	Cytotoxic	-0.0686015	0.166124	0.236134	2247
BLCA	FGF2	DC	0.0503333	0.309888	0.465302	2247
BLCA	FGF2	Effector_memory	0.106287	0.0316325	0.218174	2247
BLCA	FGF2	Exhausted	-0.0634728	0.200186	0.289429	2247
BLCA	FGF2	Gamma_delta	0.019386	0.695875	0.894786	2247
BLCA	FGF2	InfiltrationScore	-0.105482	0.0329518	0.0543591	2247
BLCA	FGF2	MAIT	-0.0880771	0.0751977	0.27663	2247
BLCA	FGF2	Macrophage	-0.102344	0.0385575	0.0657024	2247
BLCA	FGF2	Monocyte	-0.101324	0.0405455	0.143078	2247
BLCA	FGF2	NK	-0.0730577	0.140226	0.20142	2247
BLCA	FGF2	NKT	-0.0207106	0.676233	0.765697	2247
BLCA	FGF2	Neutrophil	0.0304289	0.53945	0.629159	2247
BLCA	FGF2	Tfh	0.0507711	0.305694	0.42572	2247
BLCA	FGF2	Th1	0.022184	0.65464	0.738652	2247
BLCA	FGF2	Th17	0.112467	0.0229198	0.0597231	2247
BLCA	FGF2	Th2	-0.0540393	0.275568	0.375075	2247
BLCA	FGF2	Tr1	-0.0676632	0.172008	0.297103	2247
BLCA	FGF2	iTreg	-0.0491954	0.320967	0.431619	2247
BLCA	FGF2	nTreg	0.0354098	0.475134	0.728681	2247
BLCA	ICAM1	Bcell	0.134181	0.00657482	0.0633457	3383
BLCA	ICAM1	CD4_T	0.179774	0.000257786	0.0023952	3383
BLCA	ICAM1	CD4_naive	0.324956	1.63518e-11	1.57631e-10	3383
BLCA	ICAM1	CD8_T	-0.124376	0.0118211	0.0396777	3383
BLCA	ICAM1	CD8_naive	0.475789	1.70546e-24	1.20455e-22	3383
BLCA	ICAM1	Central_memory	-0.0251309	0.612319	0.725842	3383
BLCA	ICAM1	Cytotoxic	-0.515813	3.49177e-29	4.62093e-28	3383
BLCA	ICAM1	DC	-0.32874	9.20455e-12	3.8055e-10	3383
BLCA	ICAM1	Effector_memory	-0.0586752	0.236405	0.553574	3383
BLCA	ICAM1	Exhausted	-0.523657	3.54223e-30	8.03168e-29	3383
BLCA	ICAM1	Gamma_delta	0.0981052	0.0473933	0.242539	3383
BLCA	ICAM1	InfiltrationScore	-0.49972	3.18382e-27	2.86213e-26	3383
BLCA	ICAM1	MAIT	0.0560887	0.257742	0.530458	3383
BLCA	ICAM1	Macrophage	-0.50208	1.66733e-27	2.28419e-26	3383
BLCA	ICAM1	Monocyte	-0.141099	0.00424803	0.0286525	3383
BLCA	ICAM1	NK	-0.436274	1.96257e-20	1.59165e-19	3383
BLCA	ICAM1	NKT	-0.207251	2.3945e-05	9.4789e-05	3383
BLCA	ICAM1	Neutrophil	0.365682	2.18919e-14	1.21277e-13	3383
BLCA	ICAM1	Tfh	-0.156501	0.00149868	0.00427212	3383
BLCA	ICAM1	Th1	-0.488295	6.80086e-26	2.03123e-24	3383
BLCA	ICAM1	Th17	0.223673	4.93222e-06	3.4945e-05	3383
BLCA	ICAM1	Th2	-0.278254	1.04328e-08	5.16067e-08	3383
BLCA	ICAM1	Tr1	-0.116948	0.0179813	0.0458927	3383
BLCA	ICAM1	iTreg	-0.362065	4.09788e-14	3.38681e-13	3383
BLCA	ICAM1	nTreg	-0.0271789	0.583639	0.798963	3383
BLCA	ICAM3	Bcell	-0.0247986	0.617031	0.837716	3385
BLCA	ICAM3	CD4_T	-0.107026	0.0304595	0.0916378	3385
BLCA	ICAM3	CD4_naive	0.456053	2.11969e-22	5.97116e-20	3385
BLCA	ICAM3	CD8_T	-0.39477	1.05204e-16	1.82245e-14	3385
BLCA	ICAM3	CD8_naive	0.524601	2.67884e-30	9.45692e-28	3385
BLCA	ICAM3	Central_memory	-0.31729	5.11275e-11	4.36296e-09	3385
BLCA	ICAM3	Cytotoxic	-0.674243	1.54084e-55	3.92528e-53	3385
BLCA	ICAM3	DC	-0.295007	1.17353e-09	2.26381e-08	3385
BLCA	ICAM3	Effector_memory	-0.0488465	0.324416	0.638756	3385
BLCA	ICAM3	Exhausted	-0.571473	7.82932e-37	5.04191e-35	3385
BLCA	ICAM3	Gamma_delta	-0.0650562	0.189168	0.508685	3385
BLCA	ICAM3	InfiltrationScore	-0.682723	1.9849e-57	2.49162e-55	3385
BLCA	ICAM3	MAIT	0.125198	0.0112702	0.0995078	3385
BLCA	ICAM3	Macrophage	-0.539901	2.55273e-32	5.67663e-31	3385
BLCA	ICAM3	Monocyte	0.0411139	0.406944	0.627037	3385
BLCA	ICAM3	NK	-0.64354	3.40673e-49	8.94165e-47	3385
BLCA	ICAM3	NKT	-0.263849	6.09622e-08	3.79873e-07	3385
BLCA	ICAM3	Neutrophil	0.63368	2.62148e-47	3.19984e-45	3385
BLCA	ICAM3	Tfh	-0.521343	7.00015e-30	1.46101e-27	3385
BLCA	ICAM3	Th1	-0.578166	7.46657e-38	1.65825e-35	3385
BLCA	ICAM3	Th17	0.344248	8.02562e-13	5.8415e-11	3385
BLCA	ICAM3	Th2	-0.433973	3.26152e-20	7.75025e-19	3385
BLCA	ICAM3	Tr1	-0.327336	1.14027e-11	3.40566e-10	3385
BLCA	ICAM3	iTreg	-0.566941	3.72968e-36	2.58437e-33	3385
BLCA	ICAM3	nTreg	0.0256602	0.604847	0.811127	3385
BLCA	ITGA2	Bcell	-0.0139499	0.778504	0.917983	3673
BLCA	ITGA2	CD4_T	-0.00221696	0.964348	0.982439	3673
BLCA	ITGA2	CD4_naive	0.0503599	0.309633	0.43456	3673
BLCA	ITGA2	CD8_T	0.0242679	0.624588	0.785633	3673
BLCA	ITGA2	CD8_naive	0.038241	0.440534	0.537837	3673
BLCA	ITGA2	Central_memory	0.0689762	0.163818	0.287453	3673
BLCA	ITGA2	Cytotoxic	-0.0367799	0.458207	0.552214	3673
BLCA	ITGA2	DC	-0.0475023	0.337924	0.495777	3673
BLCA	ITGA2	Effector_memory	-0.031186	0.529401	0.787803	3673
BLCA	ITGA2	Exhausted	-0.0353435	0.475961	0.585234	3673
BLCA	ITGA2	Gamma_delta	-0.00239424	0.961499	0.988447	3673
BLCA	ITGA2	InfiltrationScore	-0.0577784	0.243657	0.32164	3673
BLCA	ITGA2	MAIT	0.0345001	0.486559	0.725046	3673
BLCA	ITGA2	Macrophage	-0.06835	0.167686	0.241626	3673
BLCA	ITGA2	Monocyte	-0.0297191	0.548957	0.742648	3673
BLCA	ITGA2	NK	-0.044033	0.374424	0.46386	3673
BLCA	ITGA2	NKT	-0.0151849	0.759473	0.831838	3673
BLCA	ITGA2	Neutrophil	0.0398498	0.421532	0.516449	3673
BLCA	ITGA2	Tfh	-0.0263816	0.594729	0.701901	3673
BLCA	ITGA2	Th1	-0.0619859	0.210951	0.299386	3673
BLCA	ITGA2	Th17	0.00262468	0.957797	0.976193	3673
BLCA	ITGA2	Th2	0.048316	0.329705	0.434066	3673
BLCA	ITGA2	Tr1	0.0163524	0.741614	0.837101	3673
BLCA	ITGA2	iTreg	-0.0687004	0.165513	0.250147	3673
BLCA	ITGA2	nTreg	-0.0668894	0.176975	0.440353	3673
BLCA	LCP1	Bcell	-0.131489	0.00775316	0.0712509	3936
BLCA	LCP1	CD4_T	0.0870283	0.0787495	0.18547	3936
BLCA	LCP1	CD4_naive	-0.0537705	0.277967	0.399339	3936
BLCA	LCP1	CD8_T	-0.0659616	0.183071	0.347277	3936
BLCA	LCP1	CD8_naive	0.0966116	0.0508862	0.0869791	3936
BLCA	LCP1	Central_memory	-0.0124545	0.801724	0.868315	3936
BLCA	LCP1	Cytotoxic	0.0811821	0.101112	0.152521	3936
BLCA	LCP1	DC	0.0901029	0.0687064	0.143675	3936
BLCA	LCP1	Effector_memory	-0.0770202	0.119903	0.407364	3936
BLCA	LCP1	Exhausted	0.0371906	0.4532	0.563386	3936
BLCA	LCP1	Gamma_delta	-0.0715925	0.148376	0.451327	3936
BLCA	LCP1	InfiltrationScore	0.130543	0.00821014	0.0150327	3936
BLCA	LCP1	MAIT	0.0547984	0.26887	0.541775	3936
BLCA	LCP1	Macrophage	0.174991	0.000377105	0.000883738	3936
BLCA	LCP1	Monocyte	0.115984	0.0189569	0.0837729	3936
BLCA	LCP1	NK	0.118326	0.0166619	0.0299196	3936
BLCA	LCP1	NKT	0.32621	1.35274e-11	1.72305e-10	3936
BLCA	LCP1	Neutrophil	-0.187589	0.000135593	0.000326097	3936
BLCA	LCP1	Tfh	-0.0292418	0.555395	0.667276	3936
BLCA	LCP1	Th1	-0.0497357	0.315675	0.416801	3936
BLCA	LCP1	Th17	0.0174858	0.724409	0.82333	3936
BLCA	LCP1	Th2	0.276642	1.27777e-08	6.25629e-08	3936
BLCA	LCP1	Tr1	0.163287	0.000918261	0.00334181	3936
BLCA	LCP1	iTreg	0.0230182	0.64254	0.733539	3936
BLCA	LCP1	nTreg	-0.186023	0.000154555	0.00931676	3936
BLCA	MMP1	Bcell	-0.11738	0.0175583	0.121519	4312
BLCA	MMP1	CD4_T	0.0184293	0.710191	0.82465	4312
BLCA	MMP1	CD4_naive	-0.158007	0.00134651	0.00366811	4312
BLCA	MMP1	CD8_T	0.0276812	0.5767	0.749136	4312
BLCA	MMP1	CD8_naive	-0.134489	0.00645085	0.0136561	4312
BLCA	MMP1	Central_memory	0.0366932	0.459269	0.598459	4312
BLCA	MMP1	Cytotoxic	0.213438	1.3394e-05	3.5304e-05	4312
BLCA	MMP1	DC	0.139509	0.00470445	0.0147797	4312
BLCA	MMP1	Effector_memory	-0.0347388	0.483547	0.758091	4312
BLCA	MMP1	Exhausted	0.154813	0.00168787	0.00377668	4312
BLCA	MMP1	Gamma_delta	-0.0602847	0.223772	0.551904	4312
BLCA	MMP1	InfiltrationScore	0.206125	2.6566e-05	6.5185e-05	4312
BLCA	MMP1	MAIT	0.048253	0.330337	0.600315	4312
BLCA	MMP1	Macrophage	0.183678	0.000187623	0.000455208	4312
BLCA	MMP1	Monocyte	0.0239808	0.628693	0.798132	4312
BLCA	MMP1	NK	0.203995	3.2286e-05	8.3675e-05	4312
BLCA	MMP1	NKT	0.105021	0.0337285	0.0673521	4312
BLCA	MMP1	Neutrophil	-0.167119	0.000690509	0.00152689	4312
BLCA	MMP1	Tfh	0.0553394	0.264166	0.380457	4312
BLCA	MMP1	Th1	0.137003	0.00551467	0.0116572	4312
BLCA	MMP1	Th17	-0.068031	0.169683	0.296611	4312
BLCA	MMP1	Th2	0.17252	0.000457241	0.00122613	4312
BLCA	MMP1	Tr1	0.0946935	0.0556843	0.119873	4312
BLCA	MMP1	iTreg	0.19626	6.4449e-05	0.000192027	4312
BLCA	MMP1	nTreg	-0.0266661	0.590761	0.802885	4312
BLCA	MMP10	Bcell	0.0245024	0.621244	0.840569	4319
BLCA	MMP10	CD4_T	0.0943621	0.0565502	0.145215	4319
BLCA	MMP10	CD4_naive	-0.300602	5.47779e-10	4.13471e-09	4319
BLCA	MMP10	CD8_T	0.230829	2.38405e-06	2.7662e-05	4319
BLCA	MMP10	CD8_naive	-0.31513	7.00844e-11	4.44552e-10	4319
BLCA	MMP10	Central_memory	0.19596	6.6168e-05	0.000518187	4319
BLCA	MMP10	Cytotoxic	0.458868	1.08578e-22	9.26547e-22	4319
BLCA	MMP10	DC	0.220125	7.01098e-06	4.5436e-05	4319
BLCA	MMP10	Effector_memory	-0.0571643	0.248713	0.565594	4319
BLCA	MMP10	Exhausted	0.394135	1.18892e-16	8.20872e-16	4319
BLCA	MMP10	Gamma_delta	0.0685886	0.166204	0.476778	4319
BLCA	MMP10	InfiltrationScore	0.512891	8.06681e-29	7.94888e-28	4319
BLCA	MMP10	MAIT	-0.0544499	0.271931	0.544631	4319
BLCA	MMP10	Macrophage	0.441427	6.20657e-21	5.15914e-20	4319
BLCA	MMP10	Monocyte	-0.0198062	0.689622	0.837704	4319
BLCA	MMP10	NK	0.46732	1.4038e-23	1.45791e-22	4319
BLCA	MMP10	NKT	0.32987	7.7405e-12	1.03864e-10	4319
BLCA	MMP10	Neutrophil	-0.491324	3.05428e-26	4.19915e-25	4319
BLCA	MMP10	Tfh	0.322221	2.46499e-11	2.58012e-10	4319
BLCA	MMP10	Th1	0.330948	6.5574e-12	3.78898e-11	4319
BLCA	MMP10	Th17	-0.219394	7.53243e-06	5.099e-05	4319
BLCA	MMP10	Th2	0.406828	9.80718e-18	1.52916e-16	4319
BLCA	MMP10	Tr1	0.330878	6.62858e-12	2.18302e-10	4319
BLCA	MMP10	iTreg	0.36754	1.58143e-14	1.37526e-13	4319
BLCA	MMP10	nTreg	-0.10873	0.0278975	0.155994	4319
BLCA	MMP12	Bcell	-0.180969	0.000234058	0.00576755	4321
BLCA	MMP12	CD4_T	-0.0273746	0.58093	0.729976	4321
BLCA	MMP12	CD4_naive	0.003743	0.939844	0.965024	4321
BLCA	MMP12	CD8_T	0.0376744	0.447341	0.637658	4321
BLCA	MMP12	CD8_naive	-0.0587981	0.235423	0.324344	4321
BLCA	MMP12	Central_memory	-0.0123062	0.804038	0.870271	4321
BLCA	MMP12	Cytotoxic	0.00339313	0.945458	0.960155	4321
BLCA	MMP12	DC	0.00730773	0.882864	0.930057	4321
BLCA	MMP12	Effector_memory	0.070263	0.156078	0.462177	4321
BLCA	MMP12	Exhausted	-0.0510202	0.303323	0.409386	4321
BLCA	MMP12	Gamma_delta	0.00129805	0.979121	0.992834	4321
BLCA	MMP12	InfiltrationScore	-0.17126	0.000503926	0.00108495	4321
BLCA	MMP12	MAIT	0.0972553	0.0493554	0.217992	4321
BLCA	MMP12	Macrophage	-0.21099	1.689e-05	4.5532e-05	4321
BLCA	MMP12	Monocyte	-0.113557	0.0216209	0.0919141	4321
BLCA	MMP12	NK	-0.0602836	0.223781	0.30142	4321
BLCA	MMP12	NKT	-0.00368054	0.940846	0.961249	4321
BLCA	MMP12	Neutrophil	0.0669112	0.176834	0.248907	4321
BLCA	MMP12	Tfh	0.0373353	0.451443	0.57414	4321
BLCA	MMP12	Th1	0.0488546	0.324336	0.425807	4321
BLCA	MMP12	Th17	0.0293613	0.55378	0.69445	4321
BLCA	MMP12	Th2	-0.0508707	0.304744	0.406835	4321
BLCA	MMP12	Tr1	-0.177887	0.000299867	0.00122555	4321
BLCA	MMP12	iTreg	0.00445239	0.928471	0.951879	4321
BLCA	MMP12	nTreg	0.0727821	0.141732	0.387242	4321
BLCA	MMP13	Bcell	0.183288	0.000193738	0.00503167	4322
BLCA	MMP13	CD4_T	0.302889	3.99246e-10	6.47447e-08	4322
BLCA	MMP13	CD4_naive	-0.0434577	0.380703	0.511511	4322
BLCA	MMP13	CD8_T	0.210422	1.7817e-05	0.000157622	4322
BLCA	MMP13	CD8_naive	-0.0681587	0.168881	0.246133	4322
BLCA	MMP13	Central_memory	0.127716	0.00972146	0.0327	4322
BLCA	MMP13	Cytotoxic	0.127839	0.00965088	0.0179476	4322
BLCA	MMP13	DC	-0.145239	0.00324094	0.0107098	4322
BLCA	MMP13	Effector_memory	-0.0819686	0.097838	0.371523	4322
BLCA	MMP13	Exhausted	0.0842138	0.0889564	0.144193	4322
BLCA	MMP13	Gamma_delta	0.21571	1.0774e-05	0.000923963	4322
BLCA	MMP13	InfiltrationScore	0.143768	0.00357083	0.00690914	4322
BLCA	MMP13	MAIT	-0.051147	0.302122	0.573892	4322
BLCA	MMP13	Macrophage	0.00520162	0.916475	0.942369	4322
BLCA	MMP13	Monocyte	-0.215354	1.1149e-05	0.000347992	4322
BLCA	MMP13	NK	0.222732	5.41741e-06	1.5195e-05	4322
BLCA	MMP13	NKT	0.093977	0.0575705	0.106492	4322
BLCA	MMP13	Neutrophil	-0.219531	7.43212e-06	2.0446e-05	4322
BLCA	MMP13	Tfh	0.299515	6.35989e-10	5.31508e-09	4322
BLCA	MMP13	Th1	0.0385183	0.437225	0.540408	4322
BLCA	MMP13	Th17	-0.0364627	0.462096	0.614296	4322
BLCA	MMP13	Th2	0.179371	0.000266296	0.000737969	4322
BLCA	MMP13	Tr1	0.126498	0.0104454	0.0285447	4322
BLCA	MMP13	iTreg	0.0257749	0.603234	0.701612	4322
BLCA	MMP13	nTreg	-0.17122	0.00050551	0.016938	4322
BLCA	MMP14	Bcell	0.0784973	0.112944	0.37643	4323
BLCA	MMP14	CD4_T	0.0498377	0.314682	0.490926	4323
BLCA	MMP14	CD4_naive	0.14138	0.00417148	0.0103513	4323
BLCA	MMP14	CD8_T	-0.0448796	0.3653	0.561977	4323
BLCA	MMP14	CD8_naive	0.169004	0.000598826	0.00152888	4323
BLCA	MMP14	Central_memory	-0.00605043	0.902908	0.938348	4323
BLCA	MMP14	Cytotoxic	-0.278844	9.68313e-09	3.29809e-08	4323
BLCA	MMP14	DC	-0.299747	6.16086e-10	1.30786e-08	4323
BLCA	MMP14	Effector_memory	0.0338005	0.495444	0.766232	4323
BLCA	MMP14	Exhausted	-0.216924	9.58134e-06	2.7891e-05	4323
BLCA	MMP14	Gamma_delta	0.0617186	0.21293	0.539605	4323
BLCA	MMP14	InfiltrationScore	-0.319767	3.55001e-11	1.29877e-10	4323
BLCA	MMP14	MAIT	-0.0251041	0.612699	0.806948	4323
BLCA	MMP14	Macrophage	-0.29959	6.29503e-10	2.39721e-09	4323
BLCA	MMP14	Monocyte	-0.164052	0.000867894	0.00919422	4323
BLCA	MMP14	NK	-0.233732	1.76334e-06	5.17821e-06	4323
BLCA	MMP14	NKT	-0.24853	3.56348e-07	1.94426e-06	4323
BLCA	MMP14	Neutrophil	0.262732	6.96043e-08	2.30987e-07	4323
BLCA	MMP14	Tfh	-0.102972	0.0373746	0.0746672	4323
BLCA	MMP14	Th1	-0.218999	7.82916e-06	2.453e-05	4323
BLCA	MMP14	Th17	0.15391	0.00179797	0.00660999	4323
BLCA	MMP14	Th2	-0.164712	0.000826515	0.0021265	4323
BLCA	MMP14	Tr1	-0.147848	0.00272311	0.00878609	4323
BLCA	MMP14	iTreg	-0.216196	1.028e-05	3.3689e-05	4323
BLCA	MMP14	nTreg	-0.0292096	0.55583	0.781863	4323
BLCA	MMP2	Bcell	0.0343441	0.488533	0.764623	4313
BLCA	MMP2	CD4_T	0.0787601	0.11174	0.238559	4313
BLCA	MMP2	CD4_naive	-0.424066	2.77971e-19	1.72591e-17	4313
BLCA	MMP2	CD8_T	0.291497	1.87731e-09	5.5033e-08	4313
BLCA	MMP2	CD8_naive	-0.388109	3.74539e-16	4.91525e-15	4313
BLCA	MMP2	Central_memory	0.230661	2.42565e-06	3.1075e-05	4313
BLCA	MMP2	Cytotoxic	0.600119	2.26331e-41	8.10068e-40	4313
BLCA	MMP2	DC	0.250378	2.89696e-07	2.7378e-06	4313
BLCA	MMP2	Effector_memory	-0.0879897	0.0754887	0.329081	4313
BLCA	MMP2	Exhausted	0.562935	1.45285e-35	7.19077e-34	4313
BLCA	MMP2	Gamma_delta	0.00271803	0.956297	0.986773	4313
BLCA	MMP2	InfiltrationScore	0.679315	1.16149e-56	1.33248e-54	4313
BLCA	MMP2	MAIT	-0.0539797	0.276099	0.548556	4313
BLCA	MMP2	Macrophage	0.602841	7.92967e-42	7.38526e-40	4313
BLCA	MMP2	Monocyte	-0.00565017	0.909302	0.95785	4313
BLCA	MMP2	NK	0.613251	1.3083e-43	1.01631e-41	4313
BLCA	MMP2	NKT	0.304398	3.23564e-10	3.11334e-09	4313
BLCA	MMP2	Neutrophil	-0.593563	2.71456e-40	1.39538e-38	4313
BLCA	MMP2	Tfh	0.361212	4.74528e-14	7.74139e-13	4313
BLCA	MMP2	Th1	0.466678	1.64286e-23	3.43296e-22	4313
BLCA	MMP2	Th17	-0.31459	7.58024e-11	2.27973e-09	4313
BLCA	MMP2	Th2	0.470261	6.79648e-24	3.52501e-22	4313
BLCA	MMP2	Tr1	0.381102	1.38115e-15	2.51848e-13	4313
BLCA	MMP2	iTreg	0.499567	3.31984e-27	1.92985e-25	4313
BLCA	MMP2	nTreg	-0.101748	0.0397087	0.191565	4313
BLCA	MMP3	Bcell	0.0866236	0.0801557	0.309596	4314
BLCA	MMP3	CD4_T	0.181474	0.000224676	0.00214912	4314
BLCA	MMP3	CD4_naive	0.119829	0.0153203	0.0333412	4314
BLCA	MMP3	CD8_T	0.0681011	0.169243	0.327758	4314
BLCA	MMP3	CD8_naive	0.05647	0.254516	0.345938	4314
BLCA	MMP3	Central_memory	0.0102268	0.836637	0.891607	4314
BLCA	MMP3	Cytotoxic	-0.154133	0.0017701	0.00368994	4314
BLCA	MMP3	DC	-0.149442	0.00244501	0.00838544	4314
BLCA	MMP3	Effector_memory	0.0110716	0.823356	0.936012	4314
BLCA	MMP3	Exhausted	-0.168385	0.000627572	0.00149107	4314
BLCA	MMP3	Gamma_delta	0.166656	0.000714932	0.0169654	4314
BLCA	MMP3	InfiltrationScore	-0.234163	1.68544e-06	4.57273e-06	4314
BLCA	MMP3	MAIT	-0.0195328	0.693689	0.852434	4314
BLCA	MMP3	Macrophage	-0.319278	3.81619e-11	1.59066e-10	4314
BLCA	MMP3	Monocyte	-0.216368	1.0111e-05	0.000324351	4314
BLCA	MMP3	NK	-0.116918	0.0180104	0.0320915	4314
BLCA	MMP3	NKT	-0.0716272	0.148179	0.234442	4314
BLCA	MMP3	Neutrophil	0.0476518	0.336404	0.42922	4314
BLCA	MMP3	Tfh	0.099753	0.0437751	0.085473	4314
BLCA	MMP3	Th1	-0.0902353	0.0682987	0.11349	4314
BLCA	MMP3	Th17	-0.0438899	0.375979	0.532246	4314
BLCA	MMP3	Th2	-0.0457875	0.355671	0.461278	4314
BLCA	MMP3	Tr1	-0.149891	0.00237147	0.00776432	4314
BLCA	MMP3	iTreg	-0.110961	0.0248245	0.0479148	4314
BLCA	MMP3	nTreg	-0.0313633	0.527062	0.763746	4314
BLCA	MMP9	Bcell	0.153392	0.00186392	0.0265314	4318
BLCA	MMP9	CD4_T	0.0440097	0.374676	0.551633	4318
BLCA	MMP9	CD4_naive	0.165966	0.000752816	0.00214561	4318
BLCA	MMP9	CD8_T	0.031767	0.521754	0.705956	4318
BLCA	MMP9	CD8_naive	0.302535	4.19339e-10	2.41175e-09	4318
BLCA	MMP9	Central_memory	0.0441568	0.373081	0.518179	4318
BLCA	MMP9	Cytotoxic	-0.246701	4.36653e-07	1.308e-06	4318
BLCA	MMP9	DC	-0.21284	1.4178e-05	8.4663e-05	4318
BLCA	MMP9	Effector_memory	-0.0907932	0.0666023	0.310769	4318
BLCA	MMP9	Exhausted	-0.200994	4.2349e-05	0.000115437	4318
BLCA	MMP9	Gamma_delta	0.0841681	0.0891306	0.344349	4318
BLCA	MMP9	InfiltrationScore	-0.1525	0.00198284	0.00398016	4318
BLCA	MMP9	MAIT	-0.0239548	0.629065	0.816626	4318
BLCA	MMP9	Macrophage	-0.150925	0.0022098	0.0046895	4318
BLCA	MMP9	Monocyte	-0.106373	0.0314935	0.11993	4318
BLCA	MMP9	NK	-0.138287	0.00508496	0.00998942	4318
BLCA	MMP9	NKT	-0.166371	0.000730355	0.00218476	4318
BLCA	MMP9	Neutrophil	0.128582	0.00923412	0.0173745	4318
BLCA	MMP9	Tfh	-0.000166424	0.997323	0.998014	4318
BLCA	MMP9	Th1	-0.243998	5.87901e-07	2.07714e-06	4318
BLCA	MMP9	Th17	0.110219	0.0258134	0.0658758	4318
BLCA	MMP9	Th2	-0.0205026	0.679303	0.758301	4318
BLCA	MMP9	Tr1	-0.0601352	0.224925	0.363301	4318
BLCA	MMP9	iTreg	-0.244748	5.41533e-07	2.08559e-06	4318
BLCA	MMP9	nTreg	-0.161711	0.00103067	0.0246077	4318
BLCA	PECAM1	Bcell	-0.254827	1.74839e-07	1.8581e-05	5175
BLCA	PECAM1	CD4_T	-0.284105	4.94426e-09	4.65486e-07	5175
BLCA	PECAM1	CD4_naive	-0.0982362	0.0470969	0.0899614	5175
BLCA	PECAM1	CD8_T	-0.252503	2.27884e-07	3.53098e-06	5175
BLCA	PECAM1	CD8_naive	-0.12508	0.0113478	0.0228314	5175
BLCA	PECAM1	Central_memory	-0.217923	8.69583e-06	9.2814e-05	5175
BLCA	PECAM1	Cytotoxic	0.0412916	0.404917	0.499956	5175
BLCA	PECAM1	DC	0.121201	0.0141794	0.0382245	5175
BLCA	PECAM1	Effector_memory	0.111155	0.0245729	0.193168	5175
BLCA	PECAM1	Exhausted	0.0454359	0.359381	0.468722	5175
BLCA	PECAM1	Gamma_delta	-0.226898	3.56475e-06	0.000390837	5175
BLCA	PECAM1	InfiltrationScore	-0.0459762	0.35369	0.442532	5175
BLCA	PECAM1	MAIT	0.131383	0.00780346	0.082983	5175
BLCA	PECAM1	Macrophage	0.0830077	0.0936435	0.145279	5175
BLCA	PECAM1	Monocyte	0.223919	4.81233e-06	0.000187335	5175
BLCA	PECAM1	NK	-0.0754101	0.127865	0.185729	5175
BLCA	PECAM1	NKT	0.0810225	0.101786	0.17238	5175
BLCA	PECAM1	Neutrophil	0.150274	0.00231051	0.0047592	5175
BLCA	PECAM1	Tfh	-0.243231	6.39251e-07	3.30856e-06	5175
BLCA	PECAM1	Th1	0.0580846	0.241164	0.334803	5175
BLCA	PECAM1	Th17	0.129081	0.00896327	0.026882	5175
BLCA	PECAM1	Th2	0.0230123	0.642625	0.727214	5175
BLCA	PECAM1	Tr1	-0.18997	0.00011091	0.000504408	5175
BLCA	PECAM1	iTreg	0.0171594	0.72935	0.803417	5175
BLCA	PECAM1	nTreg	0.0433047	0.382383	0.657015	5175
BLCA	SERPINE1	Bcell	0.0126774	0.798252	0.927315	5054
BLCA	SERPINE1	CD4_T	-0.134413	0.00648142	0.0284391	5054
BLCA	SERPINE1	CD4_naive	0.377816	2.51946e-15	5.11061e-14	5054
BLCA	SERPINE1	CD8_T	-0.25855	1.13729e-07	1.94485e-06	5054
BLCA	SERPINE1	CD8_naive	0.468604	1.02349e-23	5.92974e-22	5054
BLCA	SERPINE1	Central_memory	-0.254687	1.7766e-07	3.56444e-06	5054
BLCA	SERPINE1	Cytotoxic	-0.589306	1.32218e-39	4.02534e-38	5054
BLCA	SERPINE1	DC	-0.275537	1.46711e-08	2.02347e-07	5054
BLCA	SERPINE1	Effector_memory	0.00937211	0.850122	0.946748	5054
BLCA	SERPINE1	Exhausted	-0.523514	3.69564e-30	8.34674e-29	5054
BLCA	SERPINE1	Gamma_delta	0.00682911	0.890486	0.964311	5054
BLCA	SERPINE1	InfiltrationScore	-0.677487	2.96654e-56	3.15272e-54	5054
BLCA	SERPINE1	MAIT	0.124241	0.0119139	0.102472	5054
BLCA	SERPINE1	Macrophage	-0.579409	4.79752e-38	2.1813e-36	5054
BLCA	SERPINE1	Monocyte	-0.0459224	0.354255	0.57656	5054
BLCA	SERPINE1	NK	-0.598656	3.95956e-41	2.19142e-39	5054
BLCA	SERPINE1	NKT	-0.355794	1.19281e-13	2.38879e-12	5054
BLCA	SERPINE1	Neutrophil	0.542046	1.30416e-32	3.09072e-31	5054
BLCA	SERPINE1	Tfh	-0.38564	5.95327e-16	1.36053e-14	5054
BLCA	SERPINE1	Th1	-0.481565	3.9154e-25	1.02897e-23	5054
BLCA	SERPINE1	Th17	0.270839	2.6221e-08	3.33011e-07	5054
BLCA	SERPINE1	Th2	-0.410621	4.5571e-18	7.48982e-17	5054
BLCA	SERPINE1	Tr1	-0.311071	1.25911e-10	2.64383e-09	5054
BLCA	SERPINE1	iTreg	-0.479484	6.67398e-25	2.36428e-23	5054
BLCA	SERPINE1	nTreg	0.0756311	0.126748	0.362473	5054
BLCA	SPP1	Bcell	-0.0101996	0.837065	0.941599	6696
BLCA	SPP1	CD4_T	0.0632165	0.202012	0.361328	6696
BLCA	SPP1	CD4_naive	-0.224752	4.42674e-06	1.8232e-05	6696
BLCA	SPP1	CD8_T	0.113664	0.0214969	0.065001	6696
BLCA	SPP1	CD8_naive	-0.147068	0.00286933	0.00651277	6696
BLCA	SPP1	Central_memory	0.0393544	0.427332	0.570658	6696
BLCA	SPP1	Cytotoxic	0.24374	6.04732e-07	1.7938e-06	6696
BLCA	SPP1	DC	0.0705051	0.154654	0.275171	6696
BLCA	SPP1	Effector_memory	-0.0945189	0.0561392	0.285656	6696
BLCA	SPP1	Exhausted	0.233505	1.8056e-06	5.62257e-06	6696
BLCA	SPP1	Gamma_delta	0.0149432	0.763186	0.920848	6696
BLCA	SPP1	InfiltrationScore	0.243457	6.23741e-07	1.75236e-06	6696
BLCA	SPP1	MAIT	0.00281434	0.95475	0.98294	6696
BLCA	SPP1	Macrophage	0.22603	3.89197e-06	1.1092e-05	6696
BLCA	SPP1	Monocyte	-0.0688075	0.164853	0.361853	6696
BLCA	SPP1	NK	0.239786	9.28197e-07	2.79492e-06	6696
BLCA	SPP1	NKT	0.265364	5.08818e-08	3.20635e-07	6696
BLCA	SPP1	Neutrophil	-0.28494	4.43789e-09	1.62018e-08	6696
BLCA	SPP1	Tfh	0.155105	0.00165373	0.0046642	6696
BLCA	SPP1	Th1	0.173666	0.000418293	0.00105382	6696
BLCA	SPP1	Th17	0.012854	0.795503	0.8734	6696
BLCA	SPP1	Th2	0.241028	8.11951e-07	3.20032e-06	6696
BLCA	SPP1	Tr1	0.124644	0.0116392	0.0314068	6696
BLCA	SPP1	iTreg	0.175374	0.00036591	0.000981369	6696
BLCA	SPP1	nTreg	-0.128207	0.00944237	0.0842435	6696
BLCA	TIMP2	Bcell	-0.0308838	0.533401	0.792238	7077
BLCA	TIMP2	CD4_T	-0.0195632	0.693235	0.812122	7077
BLCA	TIMP2	CD4_naive	0.259037	1.07466e-07	5.6213e-07	7077
BLCA	TIMP2	CD8_T	-0.0990784	0.0452273	0.118139	7077
BLCA	TIMP2	CD8_naive	0.211356	1.6316e-05	5.3239e-05	7077
BLCA	TIMP2	Central_memory	-0.0403997	0.41515	0.558834	7077
BLCA	TIMP2	Cytotoxic	-0.314129	8.10453e-11	3.19369e-10	7077
BLCA	TIMP2	DC	-0.105328	0.0332107	0.0784442	7077
BLCA	TIMP2	Effector_memory	0.094322	0.0566557	0.287054	7077
BLCA	TIMP2	Exhausted	-0.336931	2.58081e-12	1.28506e-11	7077
BLCA	TIMP2	Gamma_delta	0.0223732	0.651887	0.873571	7077
BLCA	TIMP2	InfiltrationScore	-0.391944	1.80946e-16	9.02803e-16	7077
BLCA	TIMP2	MAIT	0.0754807	0.127507	0.366296	7077
BLCA	TIMP2	Macrophage	-0.376603	3.14031e-15	1.75256e-14	7077
BLCA	TIMP2	Monocyte	-0.0466687	0.346479	0.569131	7077
BLCA	TIMP2	NK	-0.3179	4.6747e-11	1.9622e-10	7077
BLCA	TIMP2	NKT	-0.223788	4.87544e-06	2.1645e-05	7077
BLCA	TIMP2	Neutrophil	0.270469	2.74336e-08	9.42733e-08	7077
BLCA	TIMP2	Tfh	-0.102625	0.0380244	0.0757558	7077
BLCA	TIMP2	Th1	-0.221377	6.19657e-06	1.9635e-05	7077
BLCA	TIMP2	Th17	0.153976	0.00178967	0.00658085	7077
BLCA	TIMP2	Th2	-0.300562	5.50742e-10	3.1675e-09	7077
BLCA	TIMP2	Tr1	-0.220168	6.98109e-06	4.1387e-05	7077
BLCA	TIMP2	iTreg	-0.261108	8.43169e-08	3.53405e-07	7077
BLCA	TIMP2	nTreg	0.014976	0.762682	0.895464	7077
BLCA	TNF	Bcell	-0.140412	0.00444016	0.0492426	7124
BLCA	TNF	CD4_T	-0.182316	0.000209783	0.00203361	7124
BLCA	TNF	CD4_naive	0.315821	6.3373e-11	5.50833e-10	7124
BLCA	TNF	CD8_T	-0.417842	1.03055e-18	3.13198e-16	7124
BLCA	TNF	CD8_naive	0.307589	2.06644e-10	1.23608e-09	7124
BLCA	TNF	Central_memory	-0.370082	1.01002e-14	3.36471e-12	7124
BLCA	TNF	Cytotoxic	-0.4611	6.36106e-23	5.54289e-22	7124
BLCA	TNF	DC	-0.132875	0.00712487	0.0211669	7124
BLCA	TNF	Effector_memory	-0.0485002	0.327861	0.641756	7124
BLCA	TNF	Exhausted	-0.372287	6.82407e-15	4.12325e-14	7124
BLCA	TNF	Gamma_delta	-0.196457	6.3348e-05	0.00331536	7124
BLCA	TNF	InfiltrationScore	-0.456161	2.06583e-22	1.43721e-21	7124
BLCA	TNF	MAIT	0.156099	0.00154191	0.035961	7124
BLCA	TNF	Macrophage	-0.325023	1.61862e-11	6.93357e-11	7124
BLCA	TNF	Monocyte	0.142578	0.00385954	0.0269129	7124
BLCA	TNF	NK	-0.477428	1.12643e-24	1.26791e-23	7124
BLCA	TNF	NKT	-0.133792	0.0067346	0.0163006	7124
BLCA	TNF	Neutrophil	0.581607	2.18353e-38	9.45633e-37	7124
BLCA	TNF	Tfh	-0.555291	1.85001e-34	8.4336e-32	7124
BLCA	TNF	Th1	-0.431796	5.25378e-20	7.13813e-19	7124
BLCA	TNF	Th17	0.33797	2.19061e-12	1.31764e-10	7124
BLCA	TNF	Th2	-0.323317	2.09198e-11	1.43296e-10	7124
BLCA	TNF	Tr1	-0.303347	3.74614e-10	6.91838e-09	7124
BLCA	TNF	iTreg	-0.392171	1.73262e-16	1.89006e-15	7124
BLCA	TNF	nTreg	0.0243104	0.623981	0.822444	7124
BLCA	TNFRSF11B	Bcell	0.0496152	0.316851	0.631769	4982
BLCA	TNFRSF11B	CD4_T	0.00932416	0.850879	0.915117	4982
BLCA	TNFRSF11B	CD4_naive	0.214083	1.2594e-05	4.8708e-05	4982
BLCA	TNFRSF11B	CD8_T	-0.119458	0.0156422	0.0500869	4982
BLCA	TNFRSF11B	CD8_naive	0.276793	1.25374e-08	5.99463e-08	4982
BLCA	TNFRSF11B	Central_memory	-0.0963598	0.0514957	0.119981	4982
BLCA	TNFRSF11B	Cytotoxic	-0.289126	2.56902e-09	9.11204e-09	4982
BLCA	TNFRSF11B	DC	-0.211978	1.5386e-05	9.1339e-05	4982
BLCA	TNFRSF11B	Effector_memory	0.00301517	0.951525	0.985189	4982
BLCA	TNFRSF11B	Exhausted	-0.287165	3.3227e-09	1.29667e-08	4982
BLCA	TNFRSF11B	Gamma_delta	-0.0272438	0.58274	0.833706	4982
BLCA	TNFRSF11B	InfiltrationScore	-0.390802	2.24938e-16	1.11747e-15	4982
BLCA	TNFRSF11B	MAIT	0.119386	0.0157053	0.119221	4982
BLCA	TNFRSF11B	Macrophage	-0.379875	1.72996e-15	9.8547e-15	4982
BLCA	TNFRSF11B	Monocyte	-0.127934	0.00959642	0.0517233	4982
BLCA	TNFRSF11B	NK	-0.273466	1.89773e-08	6.54477e-08	4982
BLCA	TNFRSF11B	NKT	-0.195839	6.6872e-05	0.000243214	4982
BLCA	TNFRSF11B	Neutrophil	0.254828	1.7482e-07	5.59882e-07	4982
BLCA	TNFRSF11B	Tfh	-0.178385	0.000288182	0.000940145	4982
BLCA	TNFRSF11B	Th1	-0.246306	4.56113e-07	1.63249e-06	4982
BLCA	TNFRSF11B	Th17	0.212168	1.5112e-05	9.4301e-05	4982
BLCA	TNFRSF11B	Th2	-0.20818	2.1968e-05	7.0958e-05	4982
BLCA	TNFRSF11B	Tr1	-0.163613	0.000896497	0.00327707	4982
BLCA	TNFRSF11B	iTreg	-0.180159	0.00024992	0.000685459	4982
BLCA	TNFRSF11B	nTreg	0.0334926	0.499383	0.745618	4982
BRCA	FGF2	Bcell	-0.0044832	0.906423	0.936364	2247
BRCA	FGF2	CD4_T	-0.16516	1.2975e-05	3.9863e-05	2247
BRCA	FGF2	CD4_naive	-0.00647249	0.865237	0.95417	2247
BRCA	FGF2	CD8_T	-0.0313812	0.410494	0.515597	2247
BRCA	FGF2	CD8_naive	0.141928	0.00018378	0.000448171	2247
BRCA	FGF2	Central_memory	0.0198311	0.603045	0.702615	2247
BRCA	FGF2	Cytotoxic	-0.168798	8.27483e-06	2.2045e-05	2247
BRCA	FGF2	DC	-0.0548718	0.149914	0.296276	2247
BRCA	FGF2	Effector_memory	0.144656	0.000137293	0.000691794	2247
BRCA	FGF2	Exhausted	-0.14927	8.2865e-05	0.000230317	2247
BRCA	FGF2	Gamma_delta	-0.0475503	0.21222	0.333961	2247
BRCA	FGF2	InfiltrationScore	-0.153207	5.3221e-05	0.000144208	2247
BRCA	FGF2	MAIT	-0.0322679	0.39739	0.612567	2247
BRCA	FGF2	Macrophage	-0.00136847	0.971377	0.987683	2247
BRCA	FGF2	Monocyte	-0.0353995	0.353162	0.513141	2247
BRCA	FGF2	NK	-0.220018	5.20009e-09	1.78894e-08	2247
BRCA	FGF2	NKT	-0.253997	1.27706e-11	3.71143e-10	2247
BRCA	FGF2	Neutrophil	0.217132	8.30608e-09	2.7286e-08	2247
BRCA	FGF2	Tfh	-0.140649	0.000210324	0.000497034	2247
BRCA	FGF2	Th1	-0.0492872	0.195974	0.289326	2247
BRCA	FGF2	Th17	0.0900955	0.0179261	0.0331895	2247
BRCA	FGF2	Th2	-0.144775	0.000135543	0.00119529	2247
BRCA	FGF2	Tr1	-0.0327817	0.389914	0.603089	2247
BRCA	FGF2	iTreg	-0.0202005	0.596309	0.686204	2247
BRCA	FGF2	nTreg	0.02249	0.555347	0.728461	2247
BRCA	ICAM1	Bcell	-0.184452	1.07003e-06	4.25326e-06	3383
BRCA	ICAM1	CD4_T	-0.131804	0.00051837	0.00122584	3383
BRCA	ICAM1	CD4_naive	-0.00196297	0.958951	0.986308	3383
BRCA	ICAM1	CD8_T	-0.11769	0.00195728	0.0049689	3383
BRCA	ICAM1	CD8_naive	0.349878	2.66851e-21	3.02273e-20	3383
BRCA	ICAM1	Central_memory	-0.0446116	0.241877	0.347504	3383
BRCA	ICAM1	Cytotoxic	-0.246143	5.56284e-11	2.14883e-10	3383
BRCA	ICAM1	DC	-0.162915	1.7047e-05	0.00024121	3383
BRCA	ICAM1	Effector_memory	0.0238782	0.531197	0.655847	3383
BRCA	ICAM1	Exhausted	-0.301885	5.25917e-16	4.04226e-15	3383
BRCA	ICAM1	Gamma_delta	-0.0256447	0.501253	0.626403	3383
BRCA	ICAM1	InfiltrationScore	-0.288716	1.02985e-14	7.06607e-14	3383
BRCA	ICAM1	MAIT	0.149638	7.9537e-05	0.00223799	3383
BRCA	ICAM1	Macrophage	-0.0901015	0.0179185	0.090282	3383
BRCA	ICAM1	Monocyte	-0.00634611	0.867844	0.922433	3383
BRCA	ICAM1	NK	-0.176843	2.9574e-06	8.05896e-06	3383
BRCA	ICAM1	NKT	-0.0758272	0.0464729	0.0846983	3383
BRCA	ICAM1	Neutrophil	0.22448	2.48912e-09	8.48029e-09	3383
BRCA	ICAM1	Tfh	-0.131871	0.00051496	0.00115722	3383
BRCA	ICAM1	Th1	-0.227159	1.58727e-09	6.69133e-09	3383
BRCA	ICAM1	Th17	0.175942	3.32637e-06	1.0317e-05	3383
BRCA	ICAM1	Th2	0.0247158	0.516887	0.664508	3383
BRCA	ICAM1	Tr1	-0.0547375	0.150915	0.330783	3383
BRCA	ICAM1	iTreg	-0.208703	3.14308e-08	1.64321e-07	3383
BRCA	ICAM1	nTreg	-0.1195	0.00166318	0.0162458	3383
BRCA	ICAM3	Bcell	-0.420175	6.86053e-31	1.16111e-28	3385
BRCA	ICAM3	CD4_T	-0.466355	1.4899e-38	3.29745e-36	3385
BRCA	ICAM3	CD4_naive	0.129497	0.00065007	0.0366513	3385
BRCA	ICAM3	CD8_T	-0.640255	7.37116e-81	1.27248e-77	3385
BRCA	ICAM3	CD8_naive	0.50333	1.35935e-45	5.10141e-43	3385
BRCA	ICAM3	Central_memory	-0.552759	1.84187e-56	9.35184e-54	3385
BRCA	ICAM3	Cytotoxic	-0.774504	5.70148e-139	2.46062e-135	3385
BRCA	ICAM3	DC	-0.0147295	0.699326	0.814551	3385
BRCA	ICAM3	Effector_memory	0.168804	8.26846e-06	5.945e-05	3385
BRCA	ICAM3	Exhausted	-0.553777	1.05132e-56	6.25824e-54	3385
BRCA	ICAM3	Gamma_delta	-0.345577	8.70509e-21	3.01024e-18	3385
BRCA	ICAM3	InfiltrationScore	-0.558083	9.62353e-58	4.01158e-55	3385
BRCA	ICAM3	MAIT	0.126515	0.000866418	0.0113396	3385
BRCA	ICAM3	Macrophage	0.0422888	0.267293	0.500302	3385
BRCA	ICAM3	Monocyte	0.409571	2.72432e-29	1.27108e-26	3385
BRCA	ICAM3	NK	-0.677847	5.48739e-94	4.73644e-90	3385
BRCA	ICAM3	NKT	0.0496183	0.192983	0.276792	3385
BRCA	ICAM3	Neutrophil	0.766544	1.86776e-134	5.37386e-131	3385
BRCA	ICAM3	Tfh	-0.721682	5.1768e-112	7.44726e-109	3385
BRCA	ICAM3	Th1	-0.702264	1.27934e-103	5.52131e-100	3385
BRCA	ICAM3	Th17	0.58866	1.41786e-65	1.43979e-62	3385
BRCA	ICAM3	Th2	-0.110694	0.00359847	0.0164819	3385
BRCA	ICAM3	Tr1	-0.188633	6.01062e-07	1.9924e-05	3385
BRCA	ICAM3	iTreg	-0.532509	8.62366e-52	6.96582e-49	3385
BRCA	ICAM3	nTreg	-0.0331548	0.384538	0.5844	3385
BRCA	ITGA2	Bcell	0.102761	0.00690104	0.0149476	3673
BRCA	ITGA2	CD4_T	0.15335	5.2366e-05	0.000145923	3673
BRCA	ITGA2	CD4_naive	0.0582621	0.126278	0.398298	3673
BRCA	ITGA2	CD8_T	-0.00704733	0.853398	0.897156	3673
BRCA	ITGA2	CD8_naive	-0.335225	1.39197e-19	1.36377e-18	3673
BRCA	ITGA2	Central_memory	0.0144359	0.705035	0.787055	3673
BRCA	ITGA2	Cytotoxic	0.134856	0.000382034	0.000853396	3673
BRCA	ITGA2	DC	0.0573305	0.132464	0.270747	3673
BRCA	ITGA2	Effector_memory	-0.0983212	0.00975862	0.0272859	3673
BRCA	ITGA2	Exhausted	0.134673	0.00038916	0.000981169	3673
BRCA	ITGA2	Gamma_delta	0.0436918	0.25173	0.378835	3673
BRCA	ITGA2	InfiltrationScore	0.135702	0.000350659	0.000846042	3673
BRCA	ITGA2	MAIT	-0.0887563	0.0197105	0.0933826	3673
BRCA	ITGA2	Macrophage	-0.0343973	0.366965	0.597464	3673
BRCA	ITGA2	Monocyte	-0.0133498	0.726301	0.831102	3673
BRCA	ITGA2	NK	0.15009	7.5634e-05	0.000178615	3673
BRCA	ITGA2	NKT	0.197415	1.71533e-07	1.71005e-06	3673
BRCA	ITGA2	Neutrophil	-0.118363	0.00184278	0.00371721	3673
BRCA	ITGA2	Tfh	0.0963704	0.0113172	0.0202643	3673
BRCA	ITGA2	Th1	0.125587	0.00094629	0.00229649	3673
BRCA	ITGA2	Th17	-0.057602	0.130638	0.195815	3673
BRCA	ITGA2	Th2	0.0837693	0.0277843	0.0798071	3673
BRCA	ITGA2	Tr1	-0.029557	0.438245	0.647558	3673
BRCA	ITGA2	iTreg	0.06453	0.0903115	0.14733	3673
BRCA	ITGA2	nTreg	0.104124	0.00618885	0.0393221	3673
BRCA	LCP1	Bcell	-0.0695408	0.0679125	0.114747	3936
BRCA	LCP1	CD4_T	-0.230754	8.60352e-10	4.48573e-09	3936
BRCA	LCP1	CD4_naive	0.0693557	0.0686504	0.286466	3936
BRCA	LCP1	CD8_T	-0.259755	4.20431e-12	2.73471e-11	3936
BRCA	LCP1	CD8_naive	0.0870529	0.0222023	0.0386798	3936
BRCA	LCP1	Central_memory	-0.208924	3.03735e-08	1.77983e-07	3936
BRCA	LCP1	Cytotoxic	-0.222615	3.39335e-09	1.16669e-08	3936
BRCA	LCP1	DC	0.167916	9.23672e-06	0.000143319	3936
BRCA	LCP1	Effector_memory	0.0890298	0.019334	0.0483223	3936
BRCA	LCP1	Exhausted	-0.0871868	0.021997	0.0411993	3936
BRCA	LCP1	Gamma_delta	-0.21066	2.31882e-08	2.79733e-07	3936
BRCA	LCP1	InfiltrationScore	-0.0487413	0.200978	0.269831	3936
BRCA	LCP1	MAIT	-0.000211866	0.995568	0.997822	3936
BRCA	LCP1	Macrophage	0.129931	0.000623168	0.00848403	3936
BRCA	LCP1	Monocyte	0.2405	1.55247e-10	2.06474e-09	3936
BRCA	LCP1	NK	-0.251583	2.01825e-11	8.23666e-11	3936
BRCA	LCP1	NKT	0.0482194	0.20585	0.291852	3936
BRCA	LCP1	Neutrophil	0.308827	1.02988e-16	5.31502e-16	3936
BRCA	LCP1	Tfh	-0.272006	3.60676e-13	1.71714e-12	3936
BRCA	LCP1	Th1	-0.204284	6.17857e-08	2.30518e-07	3936
BRCA	LCP1	Th17	0.183988	1.13998e-06	3.73778e-06	3936
BRCA	LCP1	Th2	-0.0550472	0.148614	0.278558	3936
BRCA	LCP1	Tr1	-0.112221	0.00315942	0.0193405	3936
BRCA	LCP1	iTreg	-0.132558	0.000480999	0.00142819	3936
BRCA	LCP1	nTreg	0.00697304	0.854926	0.924139	3936
BRCA	MMP1	Bcell	-0.132203	0.000498293	0.0013403	4312
BRCA	MMP1	CD4_T	-0.00739511	0.846251	0.878304	4312
BRCA	MMP1	CD4_naive	-0.0153941	0.686463	0.875473	4312
BRCA	MMP1	CD8_T	-0.0914268	0.016294	0.0336583	4312
BRCA	MMP1	CD8_naive	0.16871	8.36613e-06	2.3672e-05	4312
BRCA	MMP1	Central_memory	-0.0128967	0.735236	0.810223	4312
BRCA	MMP1	Cytotoxic	-0.179272	2.1478e-06	6.02592e-06	4312
BRCA	MMP1	DC	-0.102359	0.00712476	0.0307256	4312
BRCA	MMP1	Effector_memory	-0.0140331	0.712897	0.804469	4312
BRCA	MMP1	Exhausted	-0.192045	3.71824e-07	1.34962e-06	4312
BRCA	MMP1	Gamma_delta	-0.0651804	0.087106	0.167731	4312
BRCA	MMP1	InfiltrationScore	-0.153105	5.3844e-05	0.000145852	4312
BRCA	MMP1	MAIT	0.0629816	0.0983242	0.2641	4312
BRCA	MMP1	Macrophage	-0.0785762	0.0390674	0.151148	4312
BRCA	MMP1	Monocyte	-0.0216355	0.570473	0.714089	4312
BRCA	MMP1	NK	-0.082529	0.0301871	0.0479985	4312
BRCA	MMP1	NKT	-0.0846607	0.0261609	0.0524524	4312
BRCA	MMP1	Neutrophil	0.125752	0.00093164	0.00195371	4312
BRCA	MMP1	Tfh	-0.0956674	0.0119306	0.0212438	4312
BRCA	MMP1	Th1	-0.164353	1.4319e-05	4.2723e-05	4312
BRCA	MMP1	Th17	0.107431	0.00472738	0.00970383	4312
BRCA	MMP1	Th2	0.0692154	0.0692134	0.159161	4312
BRCA	MMP1	Tr1	-0.00715642	0.851155	0.926975	4312
BRCA	MMP1	iTreg	-0.0806129	0.0342483	0.0648064	4312
BRCA	MMP1	nTreg	-0.00616204	0.871643	0.934085	4312
BRCA	MMP10	Bcell	0.00491037	0.897554	0.930152	4319
BRCA	MMP10	CD4_T	0.204423	6.04966e-08	2.51894e-07	4319
BRCA	MMP10	CD4_naive	-0.00432863	0.909636	0.97115	4319
BRCA	MMP10	CD8_T	0.125743	0.00093243	0.0025092	4319
BRCA	MMP10	CD8_naive	-0.0199084	0.601632	0.67258	4319
BRCA	MMP10	Central_memory	0.107953	0.00452755	0.0115586	4319
BRCA	MMP10	Cytotoxic	0.109092	0.00411807	0.00808429	4319
BRCA	MMP10	DC	-0.101483	0.00763485	0.0324232	4319
BRCA	MMP10	Effector_memory	-0.183145	1.27809e-06	1.1767e-05	4319
BRCA	MMP10	Exhausted	-0.0258067	0.498551	0.595646	4319
BRCA	MMP10	Gamma_delta	0.107914	0.00454231	0.0146158	4319
BRCA	MMP10	InfiltrationScore	0.0424598	0.265362	0.342066	4319
BRCA	MMP10	MAIT	0.0166486	0.66243	0.81531	4319
BRCA	MMP10	Macrophage	-0.116052	0.00226394	0.0216283	4319
BRCA	MMP10	Monocyte	-0.127251	0.000807592	0.00310086	4319
BRCA	MMP10	NK	0.164213	1.4565e-05	3.7117e-05	4319
BRCA	MMP10	NKT	0.113839	0.00274784	0.00768566	4319
BRCA	MMP10	Neutrophil	-0.161319	2.065e-05	5.1807e-05	4319
BRCA	MMP10	Tfh	0.205174	5.39856e-08	1.79844e-07	4319
BRCA	MMP10	Th1	0.0498908	0.190546	0.282527	4319
BRCA	MMP10	Th17	-0.0690698	0.0698021	0.112922	4319
BRCA	MMP10	Th2	0.123066	0.00119893	0.00689907	4319
BRCA	MMP10	Tr1	0.0165407	0.664484	0.818538	4319
BRCA	MMP10	iTreg	0.0325602	0.393126	0.495783	4319
BRCA	MMP10	nTreg	-0.0673843	0.0769204	0.209663	4319
BRCA	MMP12	Bcell	-0.216202	9.6452e-09	4.9067e-08	4321
BRCA	MMP12	CD4_T	-0.0232188	0.542601	0.611395	4321
BRCA	MMP12	CD4_naive	-0.0583034	0.126009	0.397969	4321
BRCA	MMP12	CD8_T	-0.146624	0.000110896	0.000341613	4321
BRCA	MMP12	CD8_naive	0.183778	1.17289e-06	3.62081e-06	4321
BRCA	MMP12	Central_memory	-0.145009	0.000132161	0.000464853	4321
BRCA	MMP12	Cytotoxic	-0.180272	1.88046e-06	5.3017e-06	4321
BRCA	MMP12	DC	-0.0481933	0.206096	0.369837	4321
BRCA	MMP12	Effector_memory	-0.00354269	0.925991	0.951341	4321
BRCA	MMP12	Exhausted	-0.159901	2.445e-05	7.2286e-05	4321
BRCA	MMP12	Gamma_delta	-0.0644622	0.090651	0.173128	4321
BRCA	MMP12	InfiltrationScore	-0.120882	0.00146649	0.00320293	4321
BRCA	MMP12	MAIT	0.0501703	0.188071	0.390601	4321
BRCA	MMP12	Macrophage	0.0128496	0.736167	0.865463	4321
BRCA	MMP12	Monocyte	0.0734172	0.0539026	0.118886	4321
BRCA	MMP12	NK	-0.114542	0.0025847	0.00495939	4321
BRCA	MMP12	NKT	0.148606	8.9193e-05	0.000399001	4321
BRCA	MMP12	Neutrophil	0.14862	8.9056e-05	0.000209337	4321
BRCA	MMP12	Tfh	-0.0878495	0.0210048	0.0355776	4321
BRCA	MMP12	Th1	-0.148776	8.7528e-05	0.000239916	4321
BRCA	MMP12	Th17	0.181358	1.62623e-06	5.24055e-06	4321
BRCA	MMP12	Th2	0.0622003	0.102577	0.212682	4321
BRCA	MMP12	Tr1	-0.116389	0.00219746	0.0146015	4321
BRCA	MMP12	iTreg	-0.106305	0.0051859	0.0122619	4321
BRCA	MMP12	nTreg	-0.0508399	0.182238	0.367256	4321
BRCA	MMP13	Bcell	0.184847	1.01387e-06	4.04215e-06	4322
BRCA	MMP13	CD4_T	0.180327	1.86655e-06	6.47812e-06	4322
BRCA	MMP13	CD4_naive	-0.012461	0.743863	0.901764	4322
BRCA	MMP13	CD8_T	0.258349	5.52856e-12	3.5705e-11	4322
BRCA	MMP13	CD8_naive	-0.113911	0.00273059	0.00562643	4322
BRCA	MMP13	Central_memory	0.190221	4.81164e-07	2.44952e-06	4322
BRCA	MMP13	Cytotoxic	0.193527	3.00979e-07	9.01578e-07	4322
BRCA	MMP13	DC	-0.0890407	0.0193192	0.0657552	4322
BRCA	MMP13	Effector_memory	-0.176166	3.23099e-06	2.6294e-05	4322
BRCA	MMP13	Exhausted	0.118561	0.00181036	0.00413226	4322
BRCA	MMP13	Gamma_delta	0.133506	0.000437577	0.00191772	4322
BRCA	MMP13	InfiltrationScore	0.0953032	0.0122599	0.0225848	4322
BRCA	MMP13	MAIT	-0.0294174	0.440412	0.651206	4322
BRCA	MMP13	Macrophage	-0.147714	9.8409e-05	0.00217242	4322
BRCA	MMP13	Monocyte	-0.269067	6.57637e-13	1.26847e-11	4322
BRCA	MMP13	NK	0.221432	4.12411e-09	1.42875e-08	4322
BRCA	MMP13	NKT	-0.0842971	0.0268129	0.0535165	4322
BRCA	MMP13	Neutrophil	-0.16674	1.0685e-05	2.749e-05	4322
BRCA	MMP13	Tfh	0.275078	1.91004e-13	9.28819e-13	4322
BRCA	MMP13	Th1	0.190906	4.36911e-07	1.51545e-06	4322
BRCA	MMP13	Th17	-0.17814	2.49448e-06	7.86811e-06	4322
BRCA	MMP13	Th2	0.0787104	0.0387331	0.102695	4322
BRCA	MMP13	Tr1	0.0480628	0.207328	0.407225	4322
BRCA	MMP13	iTreg	0.136979	0.00030781	0.000947356	4322
BRCA	MMP13	nTreg	-0.0406134	0.286726	0.488334	4322
BRCA	MMP14	Bcell	-0.156133	3.8031e-05	0.000122704	4323
BRCA	MMP14	CD4_T	-0.0938632	0.0136417	0.0242156	4323
BRCA	MMP14	CD4_naive	0.0755018	0.0474227	0.236061	4323
BRCA	MMP14	CD8_T	-0.150783	6.9992e-05	0.000222026	4323
BRCA	MMP14	CD8_naive	0.15843	2.9086e-05	7.7814e-05	4323
BRCA	MMP14	Central_memory	0.0328319	0.389188	0.505496	4323
BRCA	MMP14	Cytotoxic	-0.288725	1.02767e-14	4.93894e-14	4323
BRCA	MMP14	DC	-0.115169	0.00244687	0.0134695	4323
BRCA	MMP14	Effector_memory	0.00591352	0.876778	0.918563	4323
BRCA	MMP14	Exhausted	-0.261509	2.98097e-12	1.70286e-11	4323
BRCA	MMP14	Gamma_delta	-0.0581776	0.12683	0.225091	4323
BRCA	MMP14	InfiltrationScore	-0.339194	4.86876e-20	5.08774e-19	4323
BRCA	MMP14	MAIT	0.0429746	0.259605	0.476739	4323
BRCA	MMP14	Macrophage	-0.154581	4.5485e-05	0.00123654	4323
BRCA	MMP14	Monocyte	-0.0465501	0.222004	0.365867	4323
BRCA	MMP14	NK	-0.230759	8.59544e-10	3.13706e-09	4323
BRCA	MMP14	NKT	-0.108486	0.0043314	0.011347	4323
BRCA	MMP14	Neutrophil	0.267521	8.99444e-13	3.77055e-12	4323
BRCA	MMP14	Tfh	-0.165144	1.3001e-05	3.4872e-05	4323
BRCA	MMP14	Th1	-0.224481	2.48866e-09	1.03124e-08	4323
BRCA	MMP14	Th17	0.285497	2.08141e-14	1.2524e-13	4323
BRCA	MMP14	Th2	-0.0316961	0.405811	0.563054	4323
BRCA	MMP14	Tr1	-0.066858	0.0792602	0.213792	4323
BRCA	MMP14	iTreg	-0.161204	2.0936e-05	7.7373e-05	4323
BRCA	MMP14	nTreg	0.0357358	0.348604	0.551954	4323
BRCA	MMP2	Bcell	0.204289	6.17381e-08	2.83907e-07	4313
BRCA	MMP2	CD4_T	-0.0543406	0.153904	0.208658	4313
BRCA	MMP2	CD4_naive	-0.0759235	0.0461948	0.232813	4313
BRCA	MMP2	CD8_T	0.134208	0.000407841	0.00115628	4313
BRCA	MMP2	CD8_naive	-0.0609715	0.10956	0.160705	4313
BRCA	MMP2	Central_memory	0.0624715	0.101084	0.171316	4313
BRCA	MMP2	Cytotoxic	0.154077	4.819e-05	0.000118554	4313
BRCA	MMP2	DC	0.0770575	0.0430243	0.119295	4313
BRCA	MMP2	Effector_memory	-0.0778684	0.0408713	0.0899262	4313
BRCA	MMP2	Exhausted	0.173989	4.28336e-06	1.3857e-05	4313
BRCA	MMP2	Gamma_delta	-0.0832784	0.0287148	0.068676	4313
BRCA	MMP2	InfiltrationScore	0.193083	3.20703e-07	1.13425e-06	4313
BRCA	MMP2	MAIT	-0.0142058	0.709522	0.843384	4313
BRCA	MMP2	Macrophage	0.08925	0.0190355	0.0943469	4313
BRCA	MMP2	Monocyte	-0.0250372	0.511448	0.663794	4313
BRCA	MMP2	NK	0.0945044	0.0130103	0.0221904	4313
BRCA	MMP2	NKT	-0.240911	1.4419e-10	3.31886e-09	4313
BRCA	MMP2	Neutrophil	-0.113446	0.00284308	0.00557285	4313
BRCA	MMP2	Tfh	0.082976	0.0293013	0.0480323	4313
BRCA	MMP2	Th1	0.186755	7.80107e-07	2.64266e-06	4313
BRCA	MMP2	Th17	-0.230447	9.06865e-10	3.86644e-09	4313
BRCA	MMP2	Th2	0.00387981	0.918971	0.951192	4313
BRCA	MMP2	Tr1	0.163905	1.5121e-05	0.000252535	4313
BRCA	MMP2	iTreg	0.194689	2.54741e-07	1.20482e-06	4313
BRCA	MMP2	nTreg	-0.0279203	0.464034	0.655963	4313
BRCA	MMP3	Bcell	-0.359675	1.68402e-22	4.74416e-21	4314
BRCA	MMP3	CD4_T	-0.193514	3.01551e-07	1.15656e-06	4314
BRCA	MMP3	CD4_naive	0.101408	0.00768035	0.0875154	4314
BRCA	MMP3	CD8_T	-0.331669	3.52178e-19	3.73214e-18	4314
BRCA	MMP3	CD8_naive	0.352725	1.20731e-21	1.41081e-20	4314
BRCA	MMP3	Central_memory	-0.244565	7.43116e-11	5.68636e-10	4314
BRCA	MMP3	Cytotoxic	-0.480725	3.45829e-41	4.84188e-40	4314
BRCA	MMP3	DC	-0.0916398	0.0160452	0.0573418	4314
BRCA	MMP3	Effector_memory	0.0274314	0.471899	0.602151	4314
BRCA	MMP3	Exhausted	-0.387367	4.00112e-26	6.90713e-25	4314
BRCA	MMP3	Gamma_delta	-0.14646	0.0001129	0.0005794	4314
BRCA	MMP3	InfiltrationScore	-0.360978	1.15771e-22	1.46521e-21	4314
BRCA	MMP3	MAIT	0.123353	0.00116732	0.0139747	4314
BRCA	MMP3	Macrophage	-0.0381452	0.317049	0.549741	4314
BRCA	MMP3	Monocyte	0.133957	0.000418235	0.00171578	4314
BRCA	MMP3	NK	-0.332197	3.07084e-19	2.01413e-18	4314
BRCA	MMP3	NKT	0.0170466	0.654877	0.731346	4314
BRCA	MMP3	Neutrophil	0.440594	3.91551e-34	4.08419e-33	4314
BRCA	MMP3	Tfh	-0.344532	1.15718e-20	8.2924e-20	4314
BRCA	MMP3	Th1	-0.440132	4.66279e-34	8.10613e-33	4314
BRCA	MMP3	Th17	0.368951	1.12542e-23	1.25343e-22	4314
BRCA	MMP3	Th2	0.0304397	0.424685	0.581147	4314
BRCA	MMP3	Tr1	-0.127308	0.000803188	0.00652798	4314
BRCA	MMP3	iTreg	-0.33653	9.87214e-20	1.4143e-18	4314
BRCA	MMP3	nTreg	-0.0670852	0.0782432	0.212246	4314
BRCA	MMP9	Bcell	-0.0380406	0.31838	0.421842	4318
BRCA	MMP9	CD4_T	-0.219124	6.01647e-09	2.82158e-08	4318
BRCA	MMP9	CD4_naive	0.0577014	0.129974	0.403187	4318
BRCA	MMP9	CD8_T	-0.130478	0.000590703	0.00163576	4318
BRCA	MMP9	CD8_naive	0.206585	4.35346e-08	1.54924e-07	4318
BRCA	MMP9	Central_memory	-0.122855	0.00122262	0.00356103	4318
BRCA	MMP9	Cytotoxic	-0.179285	2.14398e-06	6.01619e-06	4318
BRCA	MMP9	DC	0.0692744	0.0689764	0.16835	4318
BRCA	MMP9	Effector_memory	0.131427	0.000538058	0.00226825	4318
BRCA	MMP9	Exhausted	-0.128433	0.000720744	0.00174775	4318
BRCA	MMP9	Gamma_delta	-0.137894	0.000280154	0.00129834	4318
BRCA	MMP9	InfiltrationScore	-0.146699	0.000109993	0.000285923	4318
BRCA	MMP9	MAIT	0.0312895	0.411863	0.62621	4318
BRCA	MMP9	Macrophage	0.0397938	0.296571	0.529387	4318
BRCA	MMP9	Monocyte	0.0393256	0.302294	0.458286	4318
BRCA	MMP9	NK	-0.215051	1.15959e-08	3.88699e-08	4318
BRCA	MMP9	NKT	-0.118278	0.00185692	0.00548999	4318
BRCA	MMP9	Neutrophil	0.216209	9.63506e-09	3.149e-08	4318
BRCA	MMP9	Tfh	-0.191726	3.89038e-07	1.20354e-06	4318
BRCA	MMP9	Th1	-0.10936	0.00402661	0.00890943	4318
BRCA	MMP9	Th17	0.195036	2.42294e-07	8.49975e-07	4318
BRCA	MMP9	Th2	-0.0540551	0.156082	0.288824	4318
BRCA	MMP9	Tr1	-0.0464822	0.22268	0.427347	4318
BRCA	MMP9	iTreg	-0.091014	0.0167856	0.0347695	4318
BRCA	MMP9	nTreg	0.0427876	0.261687	0.460218	4318
BRCA	PECAM1	Bcell	-0.440957	3.41314e-34	1.6367e-31	5175
BRCA	PECAM1	CD4_T	-0.26608	1.20188e-12	8.3292e-12	5175
BRCA	PECAM1	CD4_naive	0.0305306	0.423301	0.719449	5175
BRCA	PECAM1	CD8_T	-0.481447	2.53066e-41	1.14065e-39	5175
BRCA	PECAM1	CD8_naive	0.338862	5.31904e-20	5.36347e-19	5175
BRCA	PECAM1	Central_memory	-0.436381	1.90693e-33	8.46255e-32	5175
BRCA	PECAM1	Cytotoxic	-0.508253	1.3472e-46	2.31871e-45	5175
BRCA	PECAM1	DC	0.0416134	0.275015	0.449156	5175
BRCA	PECAM1	Effector_memory	0.150609	7.1365e-05	0.000388636	5175
BRCA	PECAM1	Exhausted	-0.40357	2.06503e-28	4.36871e-27	5175
BRCA	PECAM1	Gamma_delta	-0.228512	1.26205e-09	1.95398e-08	5175
BRCA	PECAM1	InfiltrationScore	-0.276356	1.46256e-13	9.11156e-13	5175
BRCA	PECAM1	MAIT	0.1162	0.00223459	0.0213479	5175
BRCA	PECAM1	Macrophage	0.181086	1.6865e-06	9.4301e-05	5175
BRCA	PECAM1	Monocyte	0.333865	1.98828e-19	1.10721e-17	5175
BRCA	PECAM1	NK	-0.438645	8.16555e-34	1.13041e-32	5175
BRCA	PECAM1	NKT	0.0550819	0.148358	0.22356	5175
BRCA	PECAM1	Neutrophil	0.532184	1.01888e-51	2.01708e-50	5175
BRCA	PECAM1	Tfh	-0.488764	1.0226e-42	2.00377e-41	5175
BRCA	PECAM1	Th1	-0.490287	5.19384e-43	1.40096e-41	5175
BRCA	PECAM1	Th17	0.461626	1.03056e-37	3.07795e-36	5175
BRCA	PECAM1	Th2	-0.0292228	0.443443	0.59937	5175
BRCA	PECAM1	Tr1	-0.141001	0.000202678	0.00215578	5175
BRCA	PECAM1	iTreg	-0.351879	1.52941e-21	2.61927e-20	5175
BRCA	PECAM1	nTreg	0.0154353	0.685667	0.820695	5175
BRCA	SERPINE1	Bcell	-0.0584105	0.125314	0.194646	5054
BRCA	SERPINE1	CD4_T	-0.125558	0.0009489	0.00213905	5054
BRCA	SERPINE1	CD4_naive	0.0931938	0.0143296	0.124683	5054
BRCA	SERPINE1	CD8_T	-0.176727	3.00275e-06	1.14e-05	5054
BRCA	SERPINE1	CD8_naive	0.111805	0.00327377	0.0066551	5054
BRCA	SERPINE1	Central_memory	-0.11033	0.00371089	0.00967982	5054
BRCA	SERPINE1	Cytotoxic	-0.219202	5.93979e-09	2.00741e-08	5054
BRCA	SERPINE1	DC	0.0244257	0.521819	0.680478	5054
BRCA	SERPINE1	Effector_memory	0.027631	0.468679	0.599542	5054
BRCA	SERPINE1	Exhausted	-0.143036	0.000163362	0.000435406	5054
BRCA	SERPINE1	Gamma_delta	-0.173357	4.64563e-06	3.2879e-05	5054
BRCA	SERPINE1	InfiltrationScore	-0.193454	3.04145e-07	1.07812e-06	5054
BRCA	SERPINE1	MAIT	0.0565928	0.137526	0.324551	5054
BRCA	SERPINE1	Macrophage	-0.0914552	0.0162606	0.0847546	5054
BRCA	SERPINE1	Monocyte	0.0787576	0.038616	0.0905498	5054
BRCA	SERPINE1	NK	-0.182526	1.38968e-06	3.91227e-06	5054
BRCA	SERPINE1	NKT	-0.0879128	0.0209122	0.0432396	5054
BRCA	SERPINE1	Neutrophil	0.204724	5.77978e-08	1.78843e-07	5054
BRCA	SERPINE1	Tfh	-0.194788	2.51116e-07	7.90916e-07	5054
BRCA	SERPINE1	Th1	-0.150167	7.4981e-05	0.000207303	5054
BRCA	SERPINE1	Th17	0.182928	1.31629e-06	4.28253e-06	5054
BRCA	SERPINE1	Th2	-0.0105823	0.781413	0.864599	5054
BRCA	SERPINE1	Tr1	-0.0143374	0.706955	0.845047	5054
BRCA	SERPINE1	iTreg	-0.0871918	0.0219893	0.044109	5054
BRCA	SERPINE1	nTreg	0.0789451	0.0381542	0.131573	5054
BRCA	SPP1	Bcell	-0.124053	0.00109339	0.00276346	6696
BRCA	SPP1	CD4_T	-0.0819049	0.0314621	0.0511518	6696
BRCA	SPP1	CD4_naive	-0.033001	0.386748	0.69152	6696
BRCA	SPP1	CD8_T	-0.203382	7.07964e-08	3.20707e-07	6696
BRCA	SPP1	CD8_naive	0.107867	0.00456008	0.00904419	6696
BRCA	SPP1	Central_memory	-0.14266	0.000170033	0.000587292	6696
BRCA	SPP1	Cytotoxic	-0.263524	2.00165e-12	8.3972e-12	6696
BRCA	SPP1	DC	-0.0699175	0.0664316	0.163596	6696
BRCA	SPP1	Effector_memory	0.127746	0.000770088	0.00310391	6696
BRCA	SPP1	Exhausted	-0.229084	1.14487e-09	5.31714e-09	6696
BRCA	SPP1	Gamma_delta	-0.105341	0.00560965	0.0175275	6696
BRCA	SPP1	InfiltrationScore	-0.168295	8.81069e-06	2.6351e-05	6696
BRCA	SPP1	MAIT	-0.00490112	0.897746	0.949969	6696
BRCA	SPP1	Macrophage	-0.0349475	0.359347	0.589789	6696
BRCA	SPP1	Monocyte	0.0877623	0.0211331	0.0543777	6696
BRCA	SPP1	NK	-0.188901	5.79022e-07	1.68023e-06	6696
BRCA	SPP1	NKT	0.0376401	0.323505	0.421293	6696
BRCA	SPP1	Neutrophil	0.270404	5.00841e-13	2.13429e-12	6696
BRCA	SPP1	Tfh	-0.176589	3.05733e-06	8.71078e-06	6696
BRCA	SPP1	Th1	-0.196896	1.85044e-07	6.63155e-07	6696
BRCA	SPP1	Th17	0.220362	4.91585e-09	1.98184e-08	6696
BRCA	SPP1	Th2	-0.0367643	0.334899	0.493965	6696
BRCA	SPP1	Tr1	-0.0688832	0.0705627	0.197299	6696
BRCA	SPP1	iTreg	-0.19745	1.7066e-07	8.22475e-07	6696
BRCA	SPP1	nTreg	-0.0429727	0.259627	0.458182	6696
BRCA	TIMP2	Bcell	0.118895	0.00175673	0.00427614	7077
BRCA	TIMP2	CD4_T	-0.211014	2.19396e-08	9.63478e-08	7077
BRCA	TIMP2	CD4_naive	0.0416453	0.274647	0.592468	7077
BRCA	TIMP2	CD8_T	0.00973357	0.798551	0.853955	7077
BRCA	TIMP2	CD8_naive	-0.0804445	0.0346267	0.0580237	7077
BRCA	TIMP2	Central_memory	-0.122275	0.00129018	0.00373948	7077
BRCA	TIMP2	Cytotoxic	-0.0920411	0.0155857	0.0277407	7077
BRCA	TIMP2	DC	0.0448563	0.239301	0.407965	7077
BRCA	TIMP2	Effector_memory	0.106783	0.00498667	0.0154329	7077
BRCA	TIMP2	Exhausted	0.0744071	0.0507392	0.0868013	7077
BRCA	TIMP2	Gamma_delta	-0.127111	0.000818519	0.00331614	7077
BRCA	TIMP2	InfiltrationScore	-0.0235756	0.536415	0.613905	7077
BRCA	TIMP2	MAIT	-0.0999812	0.00858588	0.0534312	7077
BRCA	TIMP2	Macrophage	-0.0370254	0.331475	0.563279	7077
BRCA	TIMP2	Monocyte	-0.00310588	0.935094	0.963618	7077
BRCA	TIMP2	NK	-0.104458	0.00602498	0.0108819	7077
BRCA	TIMP2	NKT	-0.266316	1.14621e-12	4.26446e-11	7077
BRCA	TIMP2	Neutrophil	0.207792	3.61742e-08	1.13686e-07	7077
BRCA	TIMP2	Tfh	-0.173523	4.54757e-06	1.2767e-05	7077
BRCA	TIMP2	Th1	0.0393608	0.301862	0.413148	7077
BRCA	TIMP2	Th17	-0.0410959	0.281034	0.375444	7077
BRCA	TIMP2	Th2	-0.0144066	0.705606	0.811841	7077
BRCA	TIMP2	Tr1	-0.00502801	0.895114	0.950538	7077
BRCA	TIMP2	iTreg	0.0252664	0.507589	0.604561	7077
BRCA	TIMP2	nTreg	0.154583	4.5477e-05	0.00138177	7077
BRCA	TNF	Bcell	-0.424949	1.25246e-31	2.54368e-29	7124
BRCA	TNF	CD4_T	-0.465584	2.04635e-38	4.21988e-36	7124
BRCA	TNF	CD4_naive	0.118287	0.00185548	0.0442419	7124
BRCA	TNF	CD8_T	-0.677436	7.82319e-94	6.75258e-90	7124
BRCA	TNF	CD8_naive	0.478063	1.08763e-40	1.63267e-38	7124
BRCA	TNF	Central_memory	-0.629191	2.45038e-77	4.2301e-73	7124
BRCA	TNF	Cytotoxic	-0.785757	1.11135e-145	1.91852e-141	7124
BRCA	TNF	DC	0.00353719	0.926105	0.959254	7124
BRCA	TNF	Effector_memory	0.124368	0.00106164	0.00407268	7124
BRCA	TNF	Exhausted	-0.512067	2.18943e-47	3.04808e-45	7124
BRCA	TNF	Gamma_delta	-0.386723	4.90293e-26	1.69279e-22	7124
BRCA	TNF	InfiltrationScore	-0.503792	1.09614e-45	1.02285e-43	7124
BRCA	TNF	MAIT	0.122752	0.00123438	0.0145454	7124
BRCA	TNF	Macrophage	0.0933373	0.0141796	0.0774579	7124
BRCA	TNF	Monocyte	0.457218	6.08365e-37	1.75037e-33	7124
BRCA	TNF	NK	-0.65001	4.36101e-84	3.76421e-81	7124
BRCA	TNF	NKT	0.100826	0.00803889	0.0191917	7124
BRCA	TNF	Neutrophil	0.79488	2.00237e-151	3.4567e-147	7124
BRCA	TNF	Tfh	-0.75438	6.82313e-128	1.17788e-123	7124
BRCA	TNF	Th1	-0.723624	6.84479e-113	1.18162e-108	7124
BRCA	TNF	Th17	0.615673	3.18611e-73	1.83339e-69	7124
BRCA	TNF	Th2	-0.0939543	0.0135504	0.0462586	7124
BRCA	TNF	Tr1	-0.201015	1.00897e-07	5.08948e-06	7124
BRCA	TNF	iTreg	-0.574806	6.34427e-62	5.47605e-58	7124
BRCA	TNF	nTreg	-0.0621292	0.102971	0.253869	7124
BRCA	TNFRSF11B	Bcell	0.257695	6.27629e-12	4.52958e-11	4982
BRCA	TNFRSF11B	CD4_T	-0.0190583	0.617245	0.67943	4982
BRCA	TNFRSF11B	CD4_naive	-0.104212	0.00614543	0.0776084	4982
BRCA	TNFRSF11B	CD8_T	0.208919	3.03967e-08	1.42786e-07	4982
BRCA	TNFRSF11B	CD8_naive	-0.0852971	0.0250525	0.0431402	4982
BRCA	TNFRSF11B	Central_memory	0.205169	5.4024e-08	3.08609e-07	4982
BRCA	TNFRSF11B	Cytotoxic	0.207495	3.78624e-08	1.21018e-07	4982
BRCA	TNFRSF11B	DC	0.0582647	0.126261	0.261527	4982
BRCA	TNFRSF11B	Effector_memory	0.00596266	0.875762	0.918053	4982
BRCA	TNFRSF11B	Exhausted	0.137018	0.000306589	0.000784911	4982
BRCA	TNFRSF11B	Gamma_delta	0.00516517	0.89227	0.929229	4982
BRCA	TNFRSF11B	InfiltrationScore	0.121081	0.00144008	0.00315123	4982
BRCA	TNFRSF11B	MAIT	-0.0067959	0.858572	0.931021	4982
BRCA	TNFRSF11B	Macrophage	-0.000740892	0.984501	0.993694	4982
BRCA	TNFRSF11B	Monocyte	-0.155361	4.158e-05	0.000212301	4982
BRCA	TNFRSF11B	NK	0.09721	0.0106211	0.0183886	4982
BRCA	TNFRSF11B	NKT	-0.218815	6.32643e-09	9.39065e-08	4982
BRCA	TNFRSF11B	Neutrophil	-0.182567	1.38195e-06	3.83055e-06	4982
BRCA	TNFRSF11B	Tfh	0.17157	5.8355e-06	1.6225e-05	4982
BRCA	TNFRSF11B	Th1	0.256284	8.24185e-12	4.11449e-11	4982
BRCA	TNFRSF11B	Th17	-0.257446	6.58656e-12	3.32565e-11	4982
BRCA	TNFRSF11B	Th2	-0.0704873	0.0642423	0.150559	4982
BRCA	TNFRSF11B	Tr1	0.152708	5.6327e-05	0.000738323	4982
BRCA	TNFRSF11B	iTreg	0.226419	1.79836e-09	1.0592e-08	4982
BRCA	TNFRSF11B	nTreg	-0.00708624	0.852598	0.922783	4982
CESC	FGF2	Bcell	0.0221442	0.697749	0.846252	2247
CESC	FGF2	CD4_T	-0.258726	3.91647e-06	5.186e-05	2247
CESC	FGF2	CD4_naive	0.00132093	0.98152	0.995344	2247
CESC	FGF2	CD8_T	0.0534141	0.348593	0.590393	2247
CESC	FGF2	CD8_naive	-0.0987363	0.0826253	0.20189	2247
CESC	FGF2	Central_memory	-0.114699	0.0435914	0.121572	2247
CESC	FGF2	Cytotoxic	0.0107747	0.850135	0.926776	2247
CESC	FGF2	DC	-0.00218152	0.969485	0.983197	2247
CESC	FGF2	Effector_memory	0.185229	0.00105099	0.00672635	2247
CESC	FGF2	Exhausted	0.140452	0.0133162	0.058166	2247
CESC	FGF2	Gamma_delta	0.0506532	0.374105	0.710038	2247
CESC	FGF2	InfiltrationScore	-0.0521237	0.360377	0.529285	2247
CESC	FGF2	MAIT	-0.184105	0.00112881	0.0130912	2247
CESC	FGF2	Macrophage	-0.0277035	0.627043	0.748912	2247
CESC	FGF2	Monocyte	-0.0863704	0.129166	0.331154	2247
CESC	FGF2	NK	-0.0040703	0.943099	0.974869	2247
CESC	FGF2	NKT	-0.136277	0.0163538	0.0963826	2247
CESC	FGF2	Neutrophil	0.0699956	0.219098	0.418206	2247
CESC	FGF2	Tfh	0.0380139	0.504874	0.683127	2247
CESC	FGF2	Th1	0.19699	0.000485551	0.00339689	2247
CESC	FGF2	Th17	-0.0276917	0.627189	0.776126	2247
CESC	FGF2	Th2	-0.0953743	0.0936837	0.359506	2247
CESC	FGF2	Tr1	-0.252908	6.53119e-06	6.1137e-05	2247
CESC	FGF2	iTreg	-0.0367116	0.519588	0.7207	2247
CESC	FGF2	nTreg	0.178859	0.00156718	0.0528922	2247
CESC	ICAM1	Bcell	0.0869829	0.126462	0.330541	3383
CESC	ICAM1	CD4_T	0.234555	3.0271e-05	0.000284598	3383
CESC	ICAM1	CD4_naive	0.167675	0.00306362	0.0672771	3383
CESC	ICAM1	CD8_T	-0.286089	2.98705e-07	5.30486e-06	3383
CESC	ICAM1	CD8_naive	0.513909	2.70684e-22	1.55914e-18	3383
CESC	ICAM1	Central_memory	-0.0672743	0.237587	0.413486	3383
CESC	ICAM1	Cytotoxic	-0.391553	8.44072e-13	2.29694e-11	3383
CESC	ICAM1	DC	-0.307243	3.35454e-08	1.17818e-06	3383
CESC	ICAM1	Effector_memory	-0.0163792	0.773928	0.886601	3383
CESC	ICAM1	Exhausted	-0.432667	1.42137e-15	5.11692e-13	3383
CESC	ICAM1	Gamma_delta	-0.172383	0.00232146	0.0723077	3383
CESC	ICAM1	InfiltrationScore	-0.291457	1.74371e-07	2.0652e-06	3383
CESC	ICAM1	MAIT	0.0578284	0.310149	0.605716	3383
CESC	ICAM1	Macrophage	-0.22392	6.9731e-05	0.000828711	3383
CESC	ICAM1	Monocyte	0.134453	0.0178609	0.0944995	3383
CESC	ICAM1	NK	-0.246819	1.1009e-05	0.000138555	3383
CESC	ICAM1	NKT	0.0637346	0.263239	0.532145	3383
CESC	ICAM1	Neutrophil	0.178302	0.00162183	0.00831116	3383
CESC	ICAM1	Tfh	-0.167898	0.00302403	0.013454	3383
CESC	ICAM1	Th1	-0.485654	9.44422e-20	5.82843e-17	3383
CESC	ICAM1	Th17	0.26562	2.10253e-06	3.7035e-05	3383
CESC	ICAM1	Th2	-0.128521	0.0236298	0.180062	3383
CESC	ICAM1	Tr1	0.0527103	0.35499	0.501408	3383
CESC	ICAM1	iTreg	-0.392792	7.05099e-13	1.11781e-10	3383
CESC	ICAM1	nTreg	-0.100454	0.0773955	0.331695	3383
CESC	ICAM3	Bcell	-0.221862	8.1582e-05	0.00181102	3385
CESC	ICAM3	CD4_T	-0.270223	1.37446e-06	2.175e-05	3385
CESC	ICAM3	CD4_naive	0.215432	0.000131983	0.00970186	3385
CESC	ICAM3	CD8_T	-0.380223	4.22438e-12	2.0153e-10	3385
CESC	ICAM3	CD8_naive	0.343471	5.19737e-10	2.17062e-08	3385
CESC	ICAM3	Central_memory	-0.422624	7.33998e-15	8.08154e-13	3385
CESC	ICAM3	Cytotoxic	-0.483368	1.48194e-19	1.04522e-17	3385
CESC	ICAM3	DC	-0.11796	0.0379156	0.100165	3385
CESC	ICAM3	Effector_memory	0.237801	2.3281e-05	0.000263282	3385
CESC	ICAM3	Exhausted	-0.361125	5.56045e-11	4.59735e-09	3385
CESC	ICAM3	Gamma_delta	-0.103275	0.0693927	0.353927	3385
CESC	ICAM3	InfiltrationScore	-0.416921	1.82002e-14	1.12321e-12	3385
CESC	ICAM3	MAIT	0.00899554	0.874657	0.954876	3385
CESC	ICAM3	Macrophage	-0.22514	6.349e-05	0.000772608	3385
CESC	ICAM3	Monocyte	0.191046	0.000721371	0.0126412	3385
CESC	ICAM3	NK	-0.338778	9.20021e-10	4.46572e-08	3385
CESC	ICAM3	NKT	-0.0050496	0.92944	0.971885	3385
CESC	ICAM3	Neutrophil	0.397544	3.51218e-13	1.27769e-11	3385
CESC	ICAM3	Tfh	-0.434514	1.04464e-15	5.29543e-14	3385
CESC	ICAM3	Th1	-0.370158	1.67816e-11	1.1646e-09	3385
CESC	ICAM3	Th17	0.293851	1.36664e-07	3.61648e-06	3385
CESC	ICAM3	Th2	-0.0286395	0.615445	0.838088	3385
CESC	ICAM3	Tr1	-0.388853	1.24599e-12	1.0985e-10	3385
CESC	ICAM3	iTreg	-0.354184	1.36124e-10	8.28245e-09	3385
CESC	ICAM3	nTreg	0.129328	0.0227606	0.185391	3385
CESC	ITGA2	Bcell	-0.1527	0.00707039	0.0505488	3673
CESC	ITGA2	CD4_T	-0.0659595	0.246902	0.406214	3673
CESC	ITGA2	CD4_naive	-0.0987885	0.0824624	0.413628	3673
CESC	ITGA2	CD8_T	0.132139	0.0199457	0.0782877	3673
CESC	ITGA2	CD8_naive	-0.418649	1.38467e-14	3.27769e-12	3673
CESC	ITGA2	Central_memory	-0.0513047	0.367984	0.551592	3673
CESC	ITGA2	Cytotoxic	0.238255	2.2434e-05	0.00015986	3673
CESC	ITGA2	DC	0.0658092	0.247983	0.394497	3673
CESC	ITGA2	Effector_memory	-0.0695007	0.222382	0.436975	3673
CESC	ITGA2	Exhausted	0.301723	6.03708e-08	1.95332e-06	3673
CESC	ITGA2	Gamma_delta	0.124151	0.0288502	0.244649	3673
CESC	ITGA2	InfiltrationScore	0.146611	0.00974035	0.0315193	3673
CESC	ITGA2	MAIT	-0.171017	0.00251783	0.0235306	3673
CESC	ITGA2	Macrophage	0.00279697	0.960882	0.976194	3673
CESC	ITGA2	Monocyte	-0.0581573	0.3074	0.55573	3673
CESC	ITGA2	NK	0.34972	2.39373e-10	1.41173e-08	3673
CESC	ITGA2	NKT	0.11066	0.0515971	0.203003	3673
CESC	ITGA2	Neutrophil	-0.0700258	0.218899	0.418002	3673
CESC	ITGA2	Tfh	0.0418627	0.462697	0.646917	3673
CESC	ITGA2	Th1	0.316743	1.18568e-08	3.6135e-07	3673
CESC	ITGA2	Th17	0.0281131	0.621956	0.772139	3673
CESC	ITGA2	Th2	0.149208	0.00850824	0.103903	3673
CESC	ITGA2	Tr1	-0.145847	0.0101321	0.0323747	3673
CESC	ITGA2	iTreg	0.169745	0.00271416	0.0156285	3673
CESC	ITGA2	nTreg	0.147994	0.00906587	0.116561	3673
CESC	LCP1	Bcell	-0.209472	0.000203579	0.00373841	3936
CESC	LCP1	CD4_T	-0.226179	5.8596e-05	0.000499775	3936
CESC	LCP1	CD4_naive	0.225234	6.3033e-05	0.00648341	3936
CESC	LCP1	CD8_T	-0.476009	6.17517e-19	8.74647e-17	3936
CESC	LCP1	CD8_naive	0.375283	8.36368e-12	6.31111e-10	3936
CESC	LCP1	Central_memory	-0.396993	3.80986e-13	2.56165e-11	3936
CESC	LCP1	Cytotoxic	-0.578254	4.67199e-29	1.46785e-26	3936
CESC	LCP1	DC	-0.220689	8.9157e-05	0.000835939	3936
CESC	LCP1	Effector_memory	0.244852	1.2994e-05	0.000161769	3936
CESC	LCP1	Exhausted	-0.431411	1.75038e-15	5.81665e-13	3936
CESC	LCP1	Gamma_delta	-0.134742	0.0176145	0.197777	3936
CESC	LCP1	InfiltrationScore	-0.51582	1.78565e-22	1.18677e-19	3936
CESC	LCP1	MAIT	-0.0395517	0.487784	0.749636	3936
CESC	LCP1	Macrophage	-0.312057	1.98954e-08	1.90996e-06	3936
CESC	LCP1	Monocyte	0.237889	2.3115e-05	0.00134489	3936
CESC	LCP1	NK	-0.443283	2.35987e-16	2.03893e-13	3936
CESC	LCP1	NKT	0.0689965	0.225763	0.488654	3936
CESC	LCP1	Neutrophil	0.501228	4.00814e-21	4.61738e-19	3936
CESC	LCP1	Tfh	-0.491291	3.06625e-20	3.35347e-18	3936
CESC	LCP1	Th1	-0.466017	4.06111e-18	1.34954e-15	3936
CESC	LCP1	Th17	0.428103	3.01728e-15	8.83705e-13	3936
CESC	LCP1	Th2	-0.193475	0.000614498	0.0233733	3936
CESC	LCP1	Tr1	-0.392771	7.07196e-13	7.31758e-11	3936
CESC	LCP1	iTreg	-0.403578	1.42604e-13	3.15922e-11	3936
CESC	LCP1	nTreg	0.156272	0.00582797	0.0943555	3936
CESC	MMP1	Bcell	-0.146628	0.00973181	0.0624919	4312
CESC	MMP1	CD4_T	-0.0821875	0.148835	0.282965	4312
CESC	MMP1	CD4_naive	0.073767	0.195209	0.590033	4312
CESC	MMP1	CD8_T	-0.114338	0.0442625	0.143716	4312
CESC	MMP1	CD8_naive	0.0767288	0.177826	0.35102	4312
CESC	MMP1	Central_memory	-0.126021	0.0265063	0.0834754	4312
CESC	MMP1	Cytotoxic	-0.169933	0.00268424	0.0115239	4312
CESC	MMP1	DC	0.0174965	0.758968	0.843244	4312
CESC	MMP1	Effector_memory	0.0948535	0.0954982	0.248638	4312
CESC	MMP1	Exhausted	-0.0584918	0.304621	0.541995	4312
CESC	MMP1	Gamma_delta	-0.0275134	0.62941	0.858719	4312
CESC	MMP1	InfiltrationScore	-0.180318	0.00143171	0.00611013	4312
CESC	MMP1	MAIT	0.0493547	0.386492	0.674117	4312
CESC	MMP1	Macrophage	-0.177212	0.00173403	0.00964405	4312
CESC	MMP1	Monocyte	0.109408	0.0543132	0.192757	4312
CESC	MMP1	NK	-0.123102	0.0302411	0.100164	4312
CESC	MMP1	NKT	0.0519308	0.362159	0.625624	4312
CESC	MMP1	Neutrophil	0.108492	0.0563756	0.157244	4312
CESC	MMP1	Tfh	-0.103605	0.068502	0.169538	4312
CESC	MMP1	Th1	-0.108461	0.0564465	0.165097	4312
CESC	MMP1	Th17	0.0654957	0.250248	0.442654	4312
CESC	MMP1	Th2	0.0185805	0.744538	0.904119	4312
CESC	MMP1	Tr1	-0.270092	1.39128e-06	1.5943e-05	4312
CESC	MMP1	iTreg	-0.140869	0.0130417	0.0554664	4312
CESC	MMP1	nTreg	0.0880397	0.121901	0.413599	4312
CESC	MMP10	Bcell	0.249337	8.88505e-06	0.000354478	4319
CESC	MMP10	CD4_T	0.378419	5.42825e-12	9.57144e-10	4319
CESC	MMP10	CD4_naive	-0.131464	0.0205924	0.205975	4319
CESC	MMP10	CD8_T	0.257928	4.20398e-06	5.5412e-05	4319
CESC	MMP10	CD8_naive	-0.0766063	0.178521	0.352111	4319
CESC	MMP10	Central_memory	0.352958	1.5908e-10	5.66784e-09	4319
CESC	MMP10	Cytotoxic	0.268244	1.65163e-06	1.4903e-05	4319
CESC	MMP10	DC	-0.0178083	0.754809	0.840303	4319
CESC	MMP10	Effector_memory	-0.179563	0.00150043	0.0090592	4319
CESC	MMP10	Exhausted	0.157793	0.00536136	0.0282022	4319
CESC	MMP10	Gamma_delta	0.0445762	0.434177	0.747351	4319
CESC	MMP10	InfiltrationScore	0.198861	0.000427641	0.00212713	4319
CESC	MMP10	MAIT	-0.0285635	0.616383	0.830534	4319
CESC	MMP10	Macrophage	0.0499995	0.380311	0.536646	4319
CESC	MMP10	Monocyte	-0.207982	0.000226455	0.00598341	4319
CESC	MMP10	NK	0.200997	0.000369393	0.00271969	4319
CESC	MMP10	NKT	0.0350502	0.538675	0.766638	4319
CESC	MMP10	Neutrophil	-0.371673	1.36766e-11	3.84904e-10	4319
CESC	MMP10	Tfh	0.382623	3.01916e-12	9.21751e-11	4319
CESC	MMP10	Th1	0.172254	0.00233937	0.01272	4319
CESC	MMP10	Th17	-0.0983843	0.0837314	0.213467	4319
CESC	MMP10	Th2	0.0617794	0.278196	0.598658	4319
CESC	MMP10	Tr1	0.296448	1.04654e-07	1.66367e-06	4319
CESC	MMP10	iTreg	0.171634	0.00242729	0.0142472	4319
CESC	MMP10	nTreg	-0.0931103	0.101775	0.379761	4319
CESC	MMP12	Bcell	0.147184	0.00945555	0.0613563	4321
CESC	MMP12	CD4_T	0.242872	1.5334e-05	0.000163863	4321
CESC	MMP12	CD4_naive	-0.0583488	0.305807	0.696152	4321
CESC	MMP12	CD8_T	0.118324	0.0373225	0.126457	4321
CESC	MMP12	CD8_naive	0.0860198	0.130733	0.28341	4321
CESC	MMP12	Central_memory	0.121827	0.0320083	0.0964772	4321
CESC	MMP12	Cytotoxic	0.0413446	0.468258	0.6664	4321
CESC	MMP12	DC	-0.221126	8.6261e-05	0.000813197	4321
CESC	MMP12	Effector_memory	-0.053975	0.343547	0.568462	4321
CESC	MMP12	Exhausted	0.048489	0.394887	0.630127	4321
CESC	MMP12	Gamma_delta	0.0781868	0.169702	0.517279	4321
CESC	MMP12	InfiltrationScore	-0.0689171	0.226299	0.38277	4321
CESC	MMP12	MAIT	-0.111651	0.0495277	0.201184	4321
CESC	MMP12	Macrophage	-0.179759	0.00148234	0.00858322	4321
CESC	MMP12	Monocyte	-0.193423	0.000616631	0.0114328	4321
CESC	MMP12	NK	0.122045	0.0316996	0.103975	4321
CESC	MMP12	NKT	0.149371	0.00843547	0.061835	4321
CESC	MMP12	Neutrophil	-0.139099	0.0142413	0.0524822	4321
CESC	MMP12	Tfh	0.185293	0.00104668	0.00548246	4321
CESC	MMP12	Th1	0.011612	0.838642	0.93125	4321
CESC	MMP12	Th17	0.0835528	0.142179	0.304632	4321
CESC	MMP12	Th2	-0.000236259	0.996694	0.998106	4321
CESC	MMP12	Tr1	0.0409808	0.472185	0.611374	4321
CESC	MMP12	iTreg	-0.08787	0.122625	0.296864	4321
CESC	MMP12	nTreg	-0.00988923	0.862322	0.95042	4321
CESC	MMP13	Bcell	0.0620065	0.27643	0.519377	4322
CESC	MMP13	CD4_T	0.133497	0.0186983	0.0589611	4322
CESC	MMP13	CD4_naive	-0.0578757	0.309752	0.699561	4322
CESC	MMP13	CD8_T	0.00659972	0.907865	0.95901	4322
CESC	MMP13	CD8_naive	-0.0306556	0.590789	0.759303	4322
CESC	MMP13	Central_memory	-0.00867495	0.879089	0.93303	4322
CESC	MMP13	Cytotoxic	-0.000325077	0.995452	0.997476	4322
CESC	MMP13	DC	-0.207535	0.000233781	0.00183463	4322
CESC	MMP13	Effector_memory	-0.0194008	0.733677	0.862386	4322
CESC	MMP13	Exhausted	0.0961314	0.0910957	0.245575	4322
CESC	MMP13	Gamma_delta	0.0434992	0.445374	0.755092	4322
CESC	MMP13	InfiltrationScore	-0.0888866	0.11834	0.23657	4322
CESC	MMP13	MAIT	-0.183212	0.00119439	0.0136592	4322
CESC	MMP13	Macrophage	-0.151175	0.00766914	0.0302494	4322
CESC	MMP13	Monocyte	-0.051365	0.36742	0.612891	4322
CESC	MMP13	NK	0.103813	0.0679448	0.185187	4322
CESC	MMP13	NKT	0.17703	0.00175351	0.0206972	4322
CESC	MMP13	Neutrophil	0.00730571	0.89806	0.953994	4322
CESC	MMP13	Tfh	0.0201187	0.724215	0.840741	4322
CESC	MMP13	Th1	0.0433275	0.447174	0.673873	4322
CESC	MMP13	Th17	0.133239	0.01893	0.0721303	4322
CESC	MMP13	Th2	-0.0122708	0.829623	0.939381	4322
CESC	MMP13	Tr1	-0.0589943	0.300479	0.445011	4322
CESC	MMP13	iTreg	-0.107662	0.0583003	0.175053	4322
CESC	MMP13	nTreg	0.0226726	0.690903	0.872911	4322
CESC	MMP14	Bcell	0.0713099	0.210547	0.442718	4323
CESC	MMP14	CD4_T	0.00139481	0.980486	0.989303	4323
CESC	MMP14	CD4_naive	0.0256323	0.653033	0.886856	4323
CESC	MMP14	CD8_T	-0.107121	0.0595826	0.179778	4323
CESC	MMP14	CD8_naive	-0.0308846	0.588017	0.757092	4323
CESC	MMP14	Central_memory	-0.178297	0.00162237	0.0087745	4323
CESC	MMP14	Cytotoxic	-0.205948	0.000261577	0.00146044	4323
CESC	MMP14	DC	-0.364359	3.63653e-11	4.83378e-09	4323
CESC	MMP14	Effector_memory	0.0136067	0.811405	0.906457	4323
CESC	MMP14	Exhausted	0.0192114	0.73618	0.874075	4323
CESC	MMP14	Gamma_delta	0.0406711	0.475542	0.776127	4323
CESC	MMP14	InfiltrationScore	-0.279504	5.69354e-07	5.97355e-06	4323
CESC	MMP14	MAIT	-0.248478	9.56164e-06	0.00038514	4323
CESC	MMP14	Macrophage	-0.265864	2.05609e-06	5.8436e-05	4323
CESC	MMP14	Monocyte	-0.12167	0.0322319	0.137418	4323
CESC	MMP14	NK	-0.0123056	0.829148	0.92021	4323
CESC	MMP14	NKT	0.15396	0.00660734	0.0523498	4323
CESC	MMP14	Neutrophil	0.232184	3.6584e-05	0.000290918	4323
CESC	MMP14	Tfh	-0.127389	0.0248968	0.0765375	4323
CESC	MMP14	Th1	-0.0347631	0.542008	0.748979	4323
CESC	MMP14	Th17	0.175408	0.00193542	0.0119188	4323
CESC	MMP14	Th2	-0.08425	0.138869	0.436938	4323
CESC	MMP14	Tr1	-0.11073	0.0514483	0.11664	4323
CESC	MMP14	iTreg	-0.195586	0.000533703	0.00410066	4323
CESC	MMP14	nTreg	0.0900911	0.113415	0.401353	4323
CESC	MMP2	Bcell	0.283224	3.96303e-07	3.0519e-05	4313
CESC	MMP2	CD4_T	0.337792	1.03609e-09	6.17366e-08	4313
CESC	MMP2	CD4_naive	-0.140719	0.0131396	0.161373	4313
CESC	MMP2	CD8_T	0.23616	2.6598e-05	0.000284237	4313
CESC	MMP2	CD8_naive	-0.115216	0.0426478	0.122949	4313
CESC	MMP2	Central_memory	0.278749	6.12434e-07	8.96094e-06	4313
CESC	MMP2	Cytotoxic	0.268516	1.6106e-06	1.4594e-05	4313
CESC	MMP2	DC	-0.00686904	0.904123	0.943755	4313
CESC	MMP2	Effector_memory	-0.332111	2.0374e-09	1.51435e-07	4313
CESC	MMP2	Exhausted	0.222959	7.5048e-05	0.000818184	4313
CESC	MMP2	Gamma_delta	0.0969906	0.0882282	0.392428	4313
CESC	MMP2	InfiltrationScore	0.241957	1.6545e-05	0.000118449	4313
CESC	MMP2	MAIT	-0.00726414	0.898637	0.964099	4313
CESC	MMP2	Macrophage	0.0726242	0.202239	0.345946	4313
CESC	MMP2	Monocyte	-0.153791	0.00666798	0.0513013	4313
CESC	MMP2	NK	0.270136	1.38566e-06	2.3372e-05	4313
CESC	MMP2	NKT	0.0307811	0.589268	0.798642	4313
CESC	MMP2	Neutrophil	-0.331071	2.30239e-09	4.40591e-08	4313
CESC	MMP2	Tfh	0.322985	5.86703e-09	1.03031e-07	4313
CESC	MMP2	Th1	0.179128	0.00154138	0.00891061	4313
CESC	MMP2	Th17	-0.225053	6.3915e-05	0.000675921	4313
CESC	MMP2	Th2	0.0585566	0.304085	0.622803	4313
CESC	MMP2	Tr1	0.363577	4.03174e-11	1.893e-09	4313
CESC	MMP2	iTreg	0.176492	0.00181205	0.0112432	4313
CESC	MMP2	nTreg	-0.125995	0.0265369	0.198665	4313
CESC	MMP3	Bcell	0.209293	0.000206209	0.00377867	4314
CESC	MMP3	CD4_T	0.177155	0.00174008	0.00858856	4314
CESC	MMP3	CD4_naive	-0.0456872	0.422799	0.773916	4314
CESC	MMP3	CD8_T	0.124192	0.028797	0.103542	4314
CESC	MMP3	CD8_naive	0.0913515	0.108434	0.247359	4314
CESC	MMP3	Central_memory	0.0633092	0.266445	0.445925	4314
CESC	MMP3	Cytotoxic	0.0250696	0.660168	0.810849	4314
CESC	MMP3	DC	-0.189071	0.000820678	0.00501994	4314
CESC	MMP3	Effector_memory	0.0493859	0.386191	0.609071	4314
CESC	MMP3	Exhausted	0.0625982	0.271864	0.506065	4314
CESC	MMP3	Gamma_delta	0.127081	0.0252521	0.230876	4314
CESC	MMP3	InfiltrationScore	-0.127317	0.0249798	0.0687388	4314
CESC	MMP3	MAIT	-0.130968	0.0210794	0.110614	4314
CESC	MMP3	Macrophage	-0.268704	1.5828e-06	4.7984e-05	4314
CESC	MMP3	Monocyte	-0.233818	3.2113e-05	0.00161783	4314
CESC	MMP3	NK	0.0573099	0.314514	0.536026	4314
CESC	MMP3	NKT	-0.0358075	0.529932	0.759935	4314
CESC	MMP3	Neutrophil	-0.106576	0.0608996	0.166379	4314
CESC	MMP3	Tfh	0.196321	0.000507978	0.00293869	4314
CESC	MMP3	Th1	0.0559698	0.325982	0.558439	4314
CESC	MMP3	Th17	-0.0213043	0.708681	0.832752	4314
CESC	MMP3	Th2	0.0743173	0.191889	0.505581	4314
CESC	MMP3	Tr1	-0.0423475	0.457526	0.59917	4314
CESC	MMP3	iTreg	-0.147316	0.00939142	0.043218	4314
CESC	MMP3	nTreg	-0.075288	0.186134	0.502295	4314
CESC	MMP9	Bcell	-0.0233507	0.682153	0.837326	4318
CESC	MMP9	CD4_T	-0.210655	0.000186976	0.00132688	4318
CESC	MMP9	CD4_naive	0.0917752	0.1068	0.464393	4318
CESC	MMP9	CD8_T	-0.0829122	0.145274	0.338684	4318
CESC	MMP9	CD8_naive	0.121809	0.0320327	0.0982821	4318
CESC	MMP9	Central_memory	-0.139908	0.0136812	0.0505366	4318
CESC	MMP9	Cytotoxic	-0.196818	0.000491225	0.00256291	4318
CESC	MMP9	DC	-0.123791	0.0293201	0.0824628	4318
CESC	MMP9	Effector_memory	0.253322	6.30056e-06	8.7449e-05	4318
CESC	MMP9	Exhausted	-0.127469	0.0248058	0.0944775	4318
CESC	MMP9	Gamma_delta	-0.00320538	0.955176	0.986105	4318
CESC	MMP9	InfiltrationScore	-0.305335	4.11575e-08	5.64446e-07	4318
CESC	MMP9	MAIT	-0.123801	0.0293071	0.140557	4318
CESC	MMP9	Macrophage	-0.231375	3.901e-05	0.00053756	4318
CESC	MMP9	Monocyte	-0.166107	0.00335476	0.0343016	4318
CESC	MMP9	NK	-0.150294	0.00803546	0.0350705	4318
CESC	MMP9	NKT	-0.067473	0.236201	0.501346	4318
CESC	MMP9	Neutrophil	0.19201	0.000677048	0.00388426	4318
CESC	MMP9	Tfh	-0.104379	0.0664492	0.165569	4318
CESC	MMP9	Th1	-0.0460933	0.418683	0.648632	4318
CESC	MMP9	Th17	0.128449	0.0237087	0.0854581	4318
CESC	MMP9	Th2	-0.0529494	0.352808	0.663098	4318
CESC	MMP9	Tr1	-0.285399	3.19822e-07	4.41768e-06	4318
CESC	MMP9	iTreg	-0.141035	0.0129338	0.0551491	4318
CESC	MMP9	nTreg	0.201033	0.000368477	0.0268662	4318
CESC	PECAM1	Bcell	-0.282912	4.08609e-07	3.0968e-05	5175
CESC	PECAM1	CD4_T	-0.243823	1.4164e-05	0.000153263	5175
CESC	PECAM1	CD4_naive	0.143661	0.0113301	0.147317	5175
CESC	PECAM1	CD8_T	-0.309009	2.77246e-08	6.1817e-07	5175
CESC	PECAM1	CD8_naive	0.110522	0.0518898	0.142734	5175
CESC	PECAM1	Central_memory	-0.333911	1.64678e-09	4.55301e-08	5175
CESC	PECAM1	Cytotoxic	-0.339013	8.94255e-10	1.48584e-08	5175
CESC	PECAM1	DC	-0.140133	0.0135291	0.0459523	5175
CESC	PECAM1	Effector_memory	0.128834	0.0232892	0.0863783	5175
CESC	PECAM1	Exhausted	-0.164149	0.00375368	0.0210264	5175
CESC	PECAM1	Gamma_delta	-0.0473447	0.40615	0.731661	5175
CESC	PECAM1	InfiltrationScore	-0.335198	1.4133e-09	2.64879e-08	5175
CESC	PECAM1	MAIT	-0.0288417	0.612952	0.828322	5175
CESC	PECAM1	Macrophage	-0.179703	0.00148744	0.00860781	5175
CESC	PECAM1	Monocyte	0.19542	0.000539679	0.0105019	5175
CESC	PECAM1	NK	-0.251096	7.63971e-06	0.000101863	5175
CESC	PECAM1	NKT	0.137161	0.0156646	0.0939227	5175
CESC	PECAM1	Neutrophil	0.341517	6.60028e-10	1.39771e-08	5175
CESC	PECAM1	Tfh	-0.348838	2.67319e-10	5.97577e-09	5175
CESC	PECAM1	Th1	-0.216289	0.000123881	0.00106503	5175
CESC	PECAM1	Th17	0.290982	1.82968e-07	4.61561e-06	5175
CESC	PECAM1	Th2	-0.0571697	0.315702	0.632575	5175
CESC	PECAM1	Tr1	-0.355958	1.08498e-10	4.41007e-09	5175
CESC	PECAM1	iTreg	-0.2483	9.70781e-06	0.000137727	5175
CESC	PECAM1	nTreg	0.145497	0.010316	0.124248	5175
CESC	SERPINE1	Bcell	0.257436	4.39123e-06	0.00020453	5054
CESC	SERPINE1	CD4_T	0.121553	0.0323984	0.0904143	5054
CESC	SERPINE1	CD4_naive	-0.0436572	0.443722	0.785489	5054
CESC	SERPINE1	CD8_T	0.0516493	0.364771	0.607963	5054
CESC	SERPINE1	CD8_naive	0.0128879	0.821196	0.906723	5054
CESC	SERPINE1	Central_memory	0.091725	0.106992	0.237087	5054
CESC	SERPINE1	Cytotoxic	0.0230992	0.685393	0.828661	5054
CESC	SERPINE1	DC	-0.113691	0.0454847	0.114607	5054
CESC	SERPINE1	Effector_memory	-0.0162572	0.775568	0.887444	5054
CESC	SERPINE1	Exhausted	-0.0194729	0.732724	0.871702	5054
CESC	SERPINE1	Gamma_delta	0.0114295	0.841144	0.946413	5054
CESC	SERPINE1	InfiltrationScore	0.0181723	0.749962	0.847625	5054
CESC	SERPINE1	MAIT	-0.0853332	0.133844	0.372128	5054
CESC	SERPINE1	Macrophage	-0.0269508	0.636437	0.755987	5054
CESC	SERPINE1	Monocyte	-0.0982135	0.0842722	0.254414	5054
CESC	SERPINE1	NK	0.0660553	0.246215	0.459658	5054
CESC	SERPINE1	NKT	0.047173	0.407856	0.664905	5054
CESC	SERPINE1	Neutrophil	-0.0665524	0.24267	0.447635	5054
CESC	SERPINE1	Tfh	0.0837835	0.141077	0.28994	5054
CESC	SERPINE1	Th1	0.0192185	0.736086	0.877574	5054
CESC	SERPINE1	Th17	0.0375147	0.510488	0.690103	5054
CESC	SERPINE1	Th2	-0.123949	0.0291128	0.200434	5054
CESC	SERPINE1	Tr1	0.131752	0.0203151	0.0561042	5054
CESC	SERPINE1	iTreg	0.0513264	0.367781	0.593395	5054
CESC	SERPINE1	nTreg	-0.0121554	0.831201	0.937849	5054
CESC	SPP1	Bcell	-0.00175481	0.975452	0.989293	6696
CESC	SPP1	CD4_T	0.119213	0.0359072	0.0978669	6696
CESC	SPP1	CD4_naive	0.00289632	0.959494	0.989393	6696
CESC	SPP1	CD8_T	0.0617931	0.278089	0.517375	6696
CESC	SPP1	CD8_naive	0.0421893	0.45921	0.652937	6696
CESC	SPP1	Central_memory	0.0473959	0.405642	0.588045	6696
CESC	SPP1	Cytotoxic	-0.0200768	0.724766	0.853465	6696
CESC	SPP1	DC	-0.11531	0.0424777	0.108921	6696
CESC	SPP1	Effector_memory	0.114728	0.0435383	0.139737	6696
CESC	SPP1	Exhausted	-0.000570468	0.992018	0.995648	6696
CESC	SPP1	Gamma_delta	0.0764793	0.179244	0.529454	6696
CESC	SPP1	InfiltrationScore	-0.0792549	0.163928	0.302896	6696
CESC	SPP1	MAIT	-0.108249	0.0569334	0.220338	6696
CESC	SPP1	Macrophage	-0.106372	0.0613984	0.14632	6696
CESC	SPP1	Monocyte	-0.0744521	0.191082	0.420518	6696
CESC	SPP1	NK	0.041182	0.470011	0.681073	6696
CESC	SPP1	NKT	0.0712922	0.21066	0.469523	6696
CESC	SPP1	Neutrophil	-0.0663879	0.24384	0.448775	6696
CESC	SPP1	Tfh	0.110283	0.0524029	0.137429	6696
CESC	SPP1	Th1	0.0450579	0.429223	0.65917	6696
CESC	SPP1	Th17	0.116979	0.0395544	0.124341	6696
CESC	SPP1	Th2	0.0511	0.3699	0.678183	6696
CESC	SPP1	Tr1	-0.0577667	0.310666	0.456062	6696
CESC	SPP1	iTreg	-0.0794006	0.163153	0.359189	6696
CESC	SPP1	nTreg	0.0142743	0.802338	0.924342	6696
CESC	TIMP2	Bcell	-0.0059106	0.917449	0.963478	7077
CESC	TIMP2	CD4_T	-0.117647	0.0384315	0.103072	7077
CESC	TIMP2	CD4_naive	-0.0275785	0.628599	0.878249	7077
CESC	TIMP2	CD8_T	0.115749	0.0416908	0.137533	7077
CESC	TIMP2	CD8_naive	-0.07762	0.172827	0.343586	7077
CESC	TIMP2	Central_memory	0.135468	0.0170079	0.0596746	7077
CESC	TIMP2	Cytotoxic	0.0683187	0.230365	0.422851	7077
CESC	TIMP2	DC	0.143787	0.011258	0.039799	7077
CESC	TIMP2	Effector_memory	0.210972	0.000182745	0.00151092	7077
CESC	TIMP2	Exhausted	-0.00713599	0.900416	0.957989	7077
CESC	TIMP2	Gamma_delta	0.000947676	0.986741	0.995297	7077
CESC	TIMP2	InfiltrationScore	0.0515855	0.365364	0.533956	7077
CESC	TIMP2	MAIT	0.0148665	0.794318	0.920686	7077
CESC	TIMP2	Macrophage	0.0413159	0.468567	0.61709	7077
CESC	TIMP2	Monocyte	-0.0180931	0.751016	0.881463	7077
CESC	TIMP2	NK	-0.0167736	0.768637	0.887878	7077
CESC	TIMP2	NKT	-0.222456	7.798e-05	0.00233941	7077
CESC	TIMP2	Neutrophil	-0.0433716	0.446711	0.65537	7077
CESC	TIMP2	Tfh	0.133795	0.0184331	0.0598504	7077
CESC	TIMP2	Th1	0.0909037	0.110184	0.269456	7077
CESC	TIMP2	Th17	-0.0601554	0.291049	0.488443	7077
CESC	TIMP2	Th2	-0.0570557	0.316669	0.633233	7077
CESC	TIMP2	Tr1	-0.0467843	0.411735	0.55619	7077
CESC	TIMP2	iTreg	0.0339039	0.552044	0.742822	7077
CESC	TIMP2	nTreg	0.0335439	0.556277	0.808045	7077
CESC	TNF	Bcell	-0.0767074	0.177947	0.402899	7124
CESC	TNF	CD4_T	0.0391033	0.492734	0.64978	7124
CESC	TNF	CD4_naive	0.141545	0.012608	0.157191	7124
CESC	TNF	CD8_T	-0.274279	9.38862e-07	1.4775e-05	7124
CESC	TNF	CD8_naive	0.163051	0.00399573	0.018314	7124
CESC	TNF	Central_memory	-0.148725	0.00872644	0.035414	7124
CESC	TNF	Cytotoxic	-0.30045	6.90115e-08	8.15676e-07	7124
CESC	TNF	DC	-0.151075	0.00771004	0.0293846	7124
CESC	TNF	Effector_memory	0.155914	0.00594309	0.0286813	7124
CESC	TNF	Exhausted	-0.103698	0.0682535	0.200244	7124
CESC	TNF	Gamma_delta	-0.0468837	0.410741	0.733364	7124
CESC	TNF	InfiltrationScore	-0.229689	4.4559e-05	0.0002872	7124
CESC	TNF	MAIT	-0.0444862	0.435107	0.710328	7124
CESC	TNF	Macrophage	-0.136398	0.0162575	0.0535422	7124
CESC	TNF	Monocyte	0.113001	0.0468194	0.17493	7124
CESC	TNF	NK	-0.165708	0.0034328	0.0174672	7124
CESC	TNF	NKT	0.140905	0.0130181	0.0833775	7124
CESC	TNF	Neutrophil	0.213237	0.000155041	0.00105435	7124
CESC	TNF	Tfh	-0.24501	1.2823e-05	0.000113752	7124
CESC	TNF	Th1	-0.15953	0.0048697	0.0235315	7124
CESC	TNF	Th17	0.114415	0.044118	0.134559	7124
CESC	TNF	Th2	-0.111036	0.0508032	0.266508	7124
CESC	TNF	Tr1	-0.167483	0.00309796	0.0121859	7124
CESC	TNF	iTreg	-0.253402	6.25649e-06	9.4752e-05	7124
CESC	TNF	nTreg	0.0531954	0.350573	0.669899	7124
CESC	TNFRSF11B	Bcell	0.0280822	0.622339	0.799217	4982
CESC	TNFRSF11B	CD4_T	-0.163336	0.00393148	0.0168325	4982
CESC	TNFRSF11B	CD4_naive	-0.120816	0.0334716	0.264541	4982
CESC	TNFRSF11B	CD8_T	0.193715	0.00060477	0.00432909	4982
CESC	TNFRSF11B	CD8_naive	-0.250191	8.25833e-06	9.2967e-05	4982
CESC	TNFRSF11B	Central_memory	0.069071	0.225261	0.399068	4982
CESC	TNFRSF11B	Cytotoxic	0.254781	5.5471e-06	4.515e-05	4982
CESC	TNFRSF11B	DC	0.341779	6.39242e-10	4.5316e-08	4982
CESC	TNFRSF11B	Effector_memory	0.0331265	0.561203	0.749583	4982
CESC	TNFRSF11B	Exhausted	0.206321	0.00025477	0.00226113	4982
CESC	TNFRSF11B	Gamma_delta	0.0137829	0.80901	0.935534	4982
CESC	TNFRSF11B	InfiltrationScore	0.338888	9.07881e-10	1.77871e-08	4982
CESC	TNFRSF11B	MAIT	-0.0505991	0.374617	0.666323	4982
CESC	TNFRSF11B	Macrophage	0.272449	1.11592e-06	3.7298e-05	4982
CESC	TNFRSF11B	Monocyte	-0.00453721	0.936584	0.97249	4982
CESC	TNFRSF11B	NK	0.176872	0.00177049	0.0100871	4982
CESC	TNFRSF11B	NKT	-0.113991	0.0449144	0.186185	4982
CESC	TNFRSF11B	Neutrophil	-0.178905	0.00156272	0.00805605	4982
CESC	TNFRSF11B	Tfh	0.15754	0.0054368	0.021971	4982
CESC	TNFRSF11B	Th1	0.31574	1.32548e-08	4.01829e-07	4982
CESC	TNFRSF11B	Th17	-0.258789	3.89438e-06	6.2023e-05	4982
CESC	TNFRSF11B	Th2	0.0754112	0.185412	0.499054	4982
CESC	TNFRSF11B	Tr1	0.0902638	0.112722	0.214413	4982
CESC	TNFRSF11B	iTreg	0.23002	4.3415e-05	0.000495849	4982
CESC	TNFRSF11B	nTreg	0.0356183	0.53211	0.793892	4982
CHOL	FGF2	Bcell	-0.381486	0.0216917	0.230977	2247
CHOL	FGF2	CD4_T	-0.177452	0.300492	0.714734	2247
CHOL	FGF2	CD4_naive	-0.290893	0.0852139	0.509277	2247
CHOL	FGF2	CD8_T	-0.179969	0.293575	0.747405	2247
CHOL	FGF2	CD8_naive	-0.0309378	0.857845	0.999727	2247
CHOL	FGF2	Central_memory	-0.201425	0.238788	0.657422	2247
CHOL	FGF2	Cytotoxic	-0.099749	0.562711	0.849637	2247
CHOL	FGF2	DC	-0.0720767	0.676136	0.999686	2247
CHOL	FGF2	Effector_memory	0.291574	0.0844518	0.440221	2247
CHOL	FGF2	Exhausted	-0.0557007	0.746952	0.998541	2247
CHOL	FGF2	Gamma_delta	0.169517	0.322965	0.958934	2247
CHOL	FGF2	InfiltrationScore	-0.317029	0.0595693	0.344957	2247
CHOL	FGF2	MAIT	-0.268495	0.113342	0.999553	2247
CHOL	FGF2	Macrophage	-0.0922899	0.592414	0.999537	2247
CHOL	FGF2	Monocyte	0.190023	0.266978	0.751452	2247
CHOL	FGF2	NK	-0.0982172	0.568755	0.857772	2247
CHOL	FGF2	NKT	-0.292227	0.0837271	0.58758	2247
CHOL	FGF2	Neutrophil	0.0609104	0.724169	0.917018	2247
CHOL	FGF2	Tfh	-0.0481199	0.780482	0.917557	2247
CHOL	FGF2	Th1	-0.0431173	0.802827	0.944741	2247
CHOL	FGF2	Th17	0.183433	0.284225	0.774245	2247
CHOL	FGF2	Th2	-0.0102993	0.952461	0.999758	2247
CHOL	FGF2	Tr1	-0.225985	0.185079	0.412043	2247
CHOL	FGF2	iTreg	-0.116469	0.498749	0.898456	2247
CHOL	FGF2	nTreg	-0.0939753	0.585643	0.999274	2247
CHOL	ICAM1	Bcell	-0.0947599	0.582502	0.76882	3383
CHOL	ICAM1	CD4_T	0.236946	0.164102	0.588244	3383
CHOL	ICAM1	CD4_naive	-0.364312	0.0289317	0.40711	3383
CHOL	ICAM1	CD8_T	0.168383	0.326259	0.774832	3383
CHOL	ICAM1	CD8_naive	-0.0830165	0.630266	0.999727	3383
CHOL	ICAM1	Central_memory	0.259125	0.12699	0.482135	3383
CHOL	ICAM1	Cytotoxic	0.403115	0.0147782	0.142334	3383
CHOL	ICAM1	DC	0.225497	0.186055	0.999686	3383
CHOL	ICAM1	Effector_memory	0.109521	0.524874	0.779967	3383
CHOL	ICAM1	Exhausted	-0.0105721	0.951203	0.998541	3383
CHOL	ICAM1	Gamma_delta	0.212319	0.213799	0.958934	3383
CHOL	ICAM1	InfiltrationScore	0.239027	0.16032	0.475756	3383
CHOL	ICAM1	MAIT	-0.159681	0.352237	0.999553	3383
CHOL	ICAM1	Macrophage	0.241086	0.156641	0.999537	3383
CHOL	ICAM1	Monocyte	-0.0345027	0.841661	0.993873	3383
CHOL	ICAM1	NK	0.227714	0.181649	0.590646	3383
CHOL	ICAM1	NKT	0.0390843	0.820955	0.930723	3383
CHOL	ICAM1	Neutrophil	-0.405254	0.0142089	0.113252	3383
CHOL	ICAM1	Tfh	0.32897	0.0501045	0.249408	3383
CHOL	ICAM1	Th1	0.35279	0.0348219	0.225375	3383
CHOL	ICAM1	Th17	-0.236725	0.164506	0.640734	3383
CHOL	ICAM1	Th2	0.204699	0.23108	0.999758	3383
CHOL	ICAM1	Tr1	0.393897	0.0174558	0.126937	3383
CHOL	ICAM1	iTreg	0.35523	0.0334989	0.391604	3383
CHOL	ICAM1	nTreg	0.238157	0.161894	0.999274	3383
CHOL	ICAM3	Bcell	-0.349942	0.0364191	0.251705	3385
CHOL	ICAM3	CD4_T	-0.520636	0.00113276	0.0556853	3385
CHOL	ICAM3	CD4_naive	-0.00278264	0.987149	0.995401	3385
CHOL	ICAM3	CD8_T	-0.522657	0.00107481	0.048018	3385
CHOL	ICAM3	CD8_naive	-0.036352	0.83329	0.999727	3385
CHOL	ICAM3	Central_memory	-0.677187	5.74201e-06	0.0011422	3385
CHOL	ICAM3	Cytotoxic	-0.494626	0.00216538	0.0504533	3385
CHOL	ICAM3	DC	-0.133728	0.436832	0.999686	3385
CHOL	ICAM3	Effector_memory	0.341547	0.0414774	0.362533	3385
CHOL	ICAM3	Exhausted	-0.353928	0.0341994	0.998541	3385
CHOL	ICAM3	Gamma_delta	-0.103557	0.547816	0.988062	3385
CHOL	ICAM3	InfiltrationScore	-0.370962	0.0259229	0.272174	3385
CHOL	ICAM3	MAIT	-0.198442	0.245962	0.999553	3385
CHOL	ICAM3	Macrophage	-0.0823787	0.632905	0.999537	3385
CHOL	ICAM3	Monocyte	0.653235	1.5677e-05	0.00441653	3385
CHOL	ICAM3	NK	-0.379739	0.0223514	0.254128	3385
CHOL	ICAM3	NKT	-0.278249	0.100339	0.594882	3385
CHOL	ICAM3	Neutrophil	0.564806	0.000332411	0.00922345	3385
CHOL	ICAM3	Tfh	-0.569956	0.00028487	0.00831107	3385
CHOL	ICAM3	Th1	-0.542892	0.000623724	0.0290655	3385
CHOL	ICAM3	Th17	0.546824	0.000558894	0.0655601	3385
CHOL	ICAM3	Th2	0.00772449	0.964337	0.999758	3385
CHOL	ICAM3	Tr1	-0.477852	0.00320407	0.0511719	3385
CHOL	ICAM3	iTreg	-0.423041	0.0101513	0.312161	3385
CHOL	ICAM3	nTreg	-0.160144	0.350822	0.999274	3385
CHOL	ITGA2	Bcell	0.20188	0.237708	0.482767	3673
CHOL	ITGA2	CD4_T	0.207327	0.225016	0.653753	3673
CHOL	ITGA2	CD4_naive	-0.404339	0.0144501	0.36364	3673
CHOL	ITGA2	CD8_T	0.533213	0.000812604	0.042029	3673
CHOL	ITGA2	CD8_naive	-0.122462	0.476758	0.999727	3673
CHOL	ITGA2	Central_memory	0.269878	0.111425	0.450388	3673
CHOL	ITGA2	Cytotoxic	0.570436	0.000280766	0.0189484	3673
CHOL	ITGA2	DC	0.136045	0.428857	0.999686	3673
CHOL	ITGA2	Effector_memory	0.0594166	0.730679	0.886204	3673
CHOL	ITGA2	Exhausted	0.0972001	0.572783	0.998541	3673
CHOL	ITGA2	Gamma_delta	0.289987	0.0862353	0.919135	3673
CHOL	ITGA2	InfiltrationScore	0.542541	0.000629828	0.142836	3673
CHOL	ITGA2	MAIT	0.31318	0.0629052	0.999553	3673
CHOL	ITGA2	Macrophage	0.109924	0.523339	0.999537	3673
CHOL	ITGA2	Monocyte	-0.306791	0.0687662	0.386276	3673
CHOL	ITGA2	NK	0.647873	1.9397e-05	0.0252017	3673
CHOL	ITGA2	NKT	0.000129418	0.999402	0.999755	3673
CHOL	ITGA2	Neutrophil	-0.462816	0.00447923	0.0535399	3673
CHOL	ITGA2	Tfh	0.545315	0.000583021	0.0136592	3673
CHOL	ITGA2	Th1	0.604672	9.3837e-05	0.0141245	3673
CHOL	ITGA2	Th17	-0.38772	0.0194681	0.237883	3673
CHOL	ITGA2	Th2	0.0509817	0.767775	0.999758	3673
CHOL	ITGA2	Tr1	0.283029	0.0943987	0.295044	3673
[truncated: 13,702 more rows]
