# Supplementary material for: Pan-cancer analyses of senescence-related genes in extracellular matrix characterization in cancer
Source: Discov Oncol. 2023 Nov 20;14:208. doi: 10.1007/s12672-023-00828-7 (PMC10660488; doi:10.1007/s12672-023-00828-7)
Supplement: Supplementary file 13 — Supplementary file13 (XLSX 33 KB) [file 12672_2023_828_MOESM13_ESM.xlsx]

## Sheet: SheetName
Table S8 DEGs between tumor and normal samples in pan-cancer
cancertype	symbol	tumor	normal	fc	pval	fdr	n_tumor	entrez	n_normal
BLCA	FGF2	87.1085	749.315	0.116369	0.000362934	0.00484199	19	2247	19
BLCA	ICAM1	1747.06	2422.66	0.721144	0.35857	0.496086	19	3383	19
BLCA	ICAM3	312.398	527.226	0.592609	0.233595	0.389424	19	3385	19
BLCA	ITGA2	1962.05	982.404	1.99709	0.112814	0.241612	19	3673	19
BLCA	LCP1	3126.05	2461.26	1.27009	0.300611	0.456292	19	3936	19
BLCA	MMP1	2140.95	389.868	5.49032	0.0259659	0.0868844	19	4312	19
BLCA	MMP10	848.328	274.212	3.09293	0.20515	0.357997	19	4319	19
BLCA	MMP12	1441.84	437.154	3.29772	0.250202	0.406429	19	4321	19
BLCA	MMP13	553.882	65.991	8.38211	0.0111555	0.0478773	19	4322	19
BLCA	MMP14	12295.4	5947.42	2.06734	0.00132242	0.0111755	19	4323	19
BLCA	MMP2	11483.3	18501.5	0.620668	0.0548438	0.145763	19	4313	19
BLCA	MMP3	769.551	802.535	0.958905	0.966753	0.977396	19	4314	19
BLCA	MMP9	1252.73	388.1	3.22729	0.10361	0.22794	19	4318	19
BLCA	PECAM1	678.592	1973.78	0.343836	0.00059494	0.00666258	19	5175	19
BLCA	SERPINE1	5798.85	6485.16	0.894174	0.749032	0.825703	19	5054	19
BLCA	SPP1	22763.7	308.909	73.6671	0.0687531	0.171338	19	6696	19
BLCA	TIMP2	5510.18	12257	0.449558	0.00123857	0.0107439	19	7077	19
BLCA	TNF	23.4032	17.6155	1.32671	0.504573	0.628315	19	7124	19
BLCA	TNFRSF11B	76.3684	48.5023	1.57335	0.371314	0.507032	19	4982	19
BRCA	FGF2	282.855	1594.57	0.177438	3.16341e-22	7.37906e-21	114	2247	114
BRCA	ICAM1	1581.98	1058.57	1.4944	0.000542229	0.00113191	114	3383	114
BRCA	ICAM3	369.326	301.111	1.22647	0.0085446	0.0148173	114	3385	114
BRCA	ITGA2	1253.03	1666.53	0.751895	0.00102039	0.00205065	114	3673	114
BRCA	LCP1	3946.17	2685.71	1.4693	0.000802817	0.00163917	114	3936	114
BRCA	MMP1	768.04	7.10452	106.619	8.84664e-06	2.3369e-05	114	4312	114
BRCA	MMP10	137.38	12.9653	10.5225	2.115e-05	5.3093e-05	114	4319	114
BRCA	MMP12	104.34	24.3855	4.26537	0.00744641	0.0130376	114	4321	114
BRCA	MMP13	949.711	9.19486	102.187	6.95265e-07	2.09906e-06	114	4322	114
BRCA	MMP14	9769.81	4019.71	2.43044	1.62249e-13	1.11123e-12	114	4323	114
BRCA	MMP2	11209.8	11022	1.01704	0.865542	0.888074	114	4313	114
BRCA	MMP3	329.083	67.3618	4.87954	3.17631e-11	1.62141e-10	114	4314	114
BRCA	MMP9	3926.26	385.565	10.1807	0.0796979	0.114303	114	4318	114
BRCA	PECAM1	1167.15	3233.63	0.36096	4.41876e-20	7.35625e-19	114	5175	114
BRCA	SERPINE1	1824.41	883.117	2.06575	4.36086e-07	1.34863e-06	114	5054	114
BRCA	SPP1	6522.57	1183.69	5.50998	1.13237e-08	4.23236e-08	114	6696	114
BRCA	TIMP2	10924.2	15960.2	0.684465	1.97397e-06	5.65969e-06	114	7077	114
BRCA	TNF	38.5214	38.9443	0.989169	0.941297	0.951218	114	7124	114
BRCA	TNFRSF11B	179.058	152.798	1.17175	0.400101	0.459603	114	4982	114
COAD	FGF2	91.2135	316.378	0.28853	0.000217705	0.000826144	26	2247	26
COAD	ICAM1	1342.71	784.178	1.71216	0.00276205	0.00733217	26	3383	26
COAD	ICAM3	462.447	736.633	0.627836	2.0437e-05	0.000109595	26	3385	26
COAD	ITGA2	2095.2	734.951	2.85055	9.44542e-11	5.11863e-09	26	3673	26
COAD	LCP1	1660.6	2576.37	0.644567	0.00573368	0.0136746	26	3936	26
COAD	MMP1	2497.31	146.692	17.0132	0.00162139	0.00463331	26	4312	26
COAD	MMP10	62.5683	20.3441	3.06535	0.0491642	0.0857988	26	4319	26
COAD	MMP12	1527.02	480.47	3.17772	0.00117726	0.00350696	26	4321	26
COAD	MMP13	41.3029	1.1909	32.0729	0.0161382	0.0330923	26	4322	26
COAD	MMP14	7497.22	2901.46	2.5839	8.36811e-06	5.0889e-05	26	4323	26
COAD	MMP2	7838.72	5677.31	1.3807	0.177638	0.251947	26	4313	26
COAD	MMP3	905.346	52.8177	17.1104	0.000354724	0.00125755	26	4314	26
COAD	MMP9	1485.15	481.097	3.08658	0.00382698	0.00965854	26	4318	26
COAD	PECAM1	676.298	836.612	0.808401	0.136027	0.20196	26	5175	26
COAD	SERPINE1	1010.8	347.548	2.90782	0.00217539	0.00596902	26	5054	26
COAD	SPP1	4465.28	291.559	15.3102	0.00437668	0.0108501	26	6696	26
COAD	TIMP2	6043.09	7528.03	0.802748	0.259288	0.344135	26	7077	26
COAD	TNF	27.3103	33.0167	0.827688	0.671575	0.734485	26	7124	26
COAD	TNFRSF11B	512.117	104.956	4.87566	0.0153916	0.0318053	26	4982	26
ESCA	FGF2	217.98	636.232	0.342714	0.0819847	0.247796	11	2247	11
ESCA	ICAM1	2442.33	736.988	3.31363	0.0687878	0.226158	11	3383	11
ESCA	ICAM3	245.419	214.273	1.14529	0.569988	0.711835	11	3385	11
ESCA	ITGA2	3431.48	974.092	3.52249	0.00297122	0.0449149	11	3673	11
ESCA	LCP1	2193.06	967.383	2.26687	0.0380798	0.166866	11	3936	11
ESCA	MMP1	9967.67	261.374	38.1214	0.201336	0.399126	11	4312	11
ESCA	MMP10	715.262	21.49	33.134	0.033306	0.155309	11	4319	11
ESCA	MMP12	1627.74	17.9228	90.321	0.0817655	0.24766	11	4321	11
ESCA	MMP13	261.626	5.16666	49.6949	0.119456	0.301077	11	4322	11
ESCA	MMP14	7438.73	2417.84	3.07652	0.0305273	0.148322	11	4323	11
ESCA	MMP2	9522.68	7859.53	1.21161	0.746554	0.842011	11	4313	11
ESCA	MMP3	5519.42	21.5115	255.397	0.208802	0.407326	11	4314	11
ESCA	MMP9	2615.64	71.5709	36.4966	0.262187	0.462744	11	4318	11
ESCA	PECAM1	1040.25	1100.83	0.944974	0.877345	0.92879	11	5175	11
ESCA	SERPINE1	6657.14	2013.23	3.30659	0.0808664	0.246177	11	5054	11
ESCA	SPP1	7595.39	106.373	71.3373	0.309701	0.508671	11	6696	11
ESCA	TIMP2	6706.05	9900.62	0.67734	0.355489	0.533546	11	7077	11
ESCA	TNF	65.77	6.77123	9.58636	0.0445461	0.181555	11	7124	11
ESCA	TNFRSF11B	565.753	27.1373	20.7749	0.0959954	0.267594	11	4982	11
HNSC	FGF2	158.119	179.995	0.878535	0.709113	0.77687	43	2247	43
HNSC	ICAM1	3194	1622.48	1.96853	0.00292517	0.00966877	43	3383	43
HNSC	ICAM3	324.781	336.318	0.965708	0.84498	0.886609	43	3385	43
HNSC	ITGA2	3660.44	2354.96	1.55433	0.00082285	0.00345663	43	3673	43
HNSC	LCP1	3149.86	1983.1	1.58832	0.0175018	0.0415064	43	3936	43
HNSC	MMP1	12071.4	2025.36	5.95987	0.000378253	0.00180854	43	4312	43
HNSC	MMP10	3855.79	393.652	9.79269	0.000360142	0.0017374	43	4319	43
HNSC	MMP12	1399.95	110.6	12.6472	7.27422e-06	6.7774e-05	43	4321	43
HNSC	MMP13	4743.9	60.3942	78.4207	0.00400397	0.012427	43	4322	43
HNSC	MMP14	14857	5065.73	2.9328	2.12649e-13	9.40147e-11	43	4323	43
HNSC	MMP2	9487.23	5072.42	1.87034	0.0280758	0.0611659	43	4313	43
HNSC	MMP3	2944.4	400.042	7.35864	0.0163175	0.0392026	43	4314	43
HNSC	MMP9	5416.68	320.083	16.9177	7.2564e-05	0.000463427	43	4318	43
HNSC	PECAM1	655.558	1036.67	0.632401	0.0511658	0.0998963	43	5175	43
HNSC	SERPINE1	10320.3	1342.28	7.68813	1.42468e-07	2.56079e-06	43	5054	43
HNSC	SPP1	5399.9	843.943	6.39778	0.0123763	0.0312352	43	6696	43
HNSC	TIMP2	5429.75	4282.79	1.2678	0.25997	0.364328	43	7077	43
HNSC	TNF	78.2643	67.2972	1.16272	0.533719	0.627562	43	7124	43
HNSC	TNFRSF11B	70.5059	44.7626	1.57383	0.0875282	0.154417	43	4982	43
KICH	FGF2	228.741	700.71	0.326538	1.97489e-06	1.4504e-05	25	2247	25
KICH	ICAM1	569.825	1556.6	0.366111	0.00102263	0.00294198	25	3383	25
KICH	ICAM3	437.458	251.813	1.73694	0.00291204	0.00723273	25	3385	25
KICH	ITGA2	968.454	1350.5	0.717127	0.0206967	0.0397777	25	3673	25
KICH	LCP1	663.359	747.081	0.887949	0.553908	0.624742	25	3936	25
KICH	MMP1	37.8668	59.0069	0.64234	0.292211	0.375653	25	4312	25
KICH	MMP10	6.9209	3.24636	2.09807	0.543371	0.615333	25	4319	25
KICH	MMP12	24.2716	3.18028	7.42971	0.213173	0.288265	25	4321	25
KICH	MMP13	3.84659	0.096636	20.0705	0.0510252	0.0863042	25	4322	25
KICH	MMP14	3483.87	2102.35	1.6571	0.4883	0.563566	25	4323	25
KICH	MMP2	1084.48	1367.07	0.793305	0.387446	0.465372	25	4313	25
KICH	MMP3	0.298312	0.831876	0.42743	0.447034	0.523674	25	4314	25
KICH	MMP9	102.266	46.2485	2.20863	0.064731	0.105716	25	4318	25
KICH	PECAM1	1132.89	1793.04	0.631848	0.000152756	0.000580721	25	5175	25
KICH	SERPINE1	5029.86	3430.92	1.46602	0.726531	0.778245	25	5054	25
KICH	SPP1	41028.7	38563.5	1.06393	0.839255	0.871589	25	6696	25
KICH	TIMP2	3342.46	5642.39	0.592391	0.00397944	0.00946577	25	7077	25
KICH	TNF	7.76701	15.0395	0.519636	0.0629292	0.103158	25	7124	25
KICH	TNFRSF11B	775.582	2075.21	0.373766	0.00222555	0.0057195	25	4982	25
KIRC	FGF2	657.111	755.141	0.8702	0.229824	0.286357	72	2247	72
KIRC	ICAM1	3906.73	1229.28	3.17789	4.8039e-14	3.85829e-13	72	3383	72
KIRC	ICAM3	482.243	205.237	2.34903	6.64295e-14	5.23159e-13	72	3385	72
KIRC	ITGA2	1126.4	1837.89	0.612896	8.2376e-09	3.08401e-08	72	3673	72
KIRC	LCP1	4304.26	1013.62	4.2461	1.76146e-14	1.50746e-13	72	3936	72
KIRC	MMP1	167.403	113.027	1.48066	0.507123	0.564811	72	4312	72
KIRC	MMP10	3.0796	7.20323	0.435369	0.424575	0.484705	72	4319	72
KIRC	MMP12	19.8925	6.26971	3.13868	0.222899	0.27855	72	4321	72
KIRC	MMP13	9.56269	0.607972	13.6484	0.0562779	0.0809812	72	4322	72
KIRC	MMP14	5885.58	2098.5	2.80457	9.83056e-19	1.69062e-17	72	4323	72
KIRC	MMP2	1652.32	1587.43	1.04088	0.766825	0.804313	72	4313	72
KIRC	MMP3	5.72967	31.5968	0.18392	0.32513	0.384491	72	4314	72
KIRC	MMP9	665.338	41.0839	16.1577	0.000109149	0.000238933	72	4318	72
KIRC	PECAM1	5071.54	1738.79	2.91659	1.52521e-20	3.4953e-19	72	5175	72
KIRC	SERPINE1	8788.12	1845.86	4.76079	0.00163232	0.00301714	72	5054	72
KIRC	SPP1	39017.8	48099.3	0.811192	0.134451	0.177935	72	6696	72
KIRC	TIMP2	5808.47	6167.44	0.941798	0.389551	0.450054	72	7077	72
KIRC	TNF	16.2493	14.6032	1.11195	0.601789	0.654812	72	7124	72
KIRC	TNFRSF11B	1140.74	1829.7	0.623478	0.00037285	0.000755908	72	4982	72
KIRP	FGF2	600.601	438.211	1.37049	0.13867	0.221377	32	2247	32
KIRP	ICAM1	2042.11	1214.74	1.68105	0.0102971	0.0258398	32	3383	32
KIRP	ICAM3	307.394	264.214	1.16337	0.205949	0.300996	32	3385	32
KIRP	ITGA2	766.999	1406.25	0.545453	2.81841e-06	2.7449e-05	32	3673	32
KIRP	LCP1	1750.29	832.639	2.10197	0.00661962	0.0178843	32	3936	32
KIRP	MMP1	43.0851	20.1164	2.13614	0.12572	0.204752	32	4312	32
KIRP	MMP10	3.77178	0.695875	4.86481	0.321288	0.42294	32	4319	32
KIRP	MMP12	33.0845	5.49248	5.93376	0.173665	0.263649	32	4321	32
KIRP	MMP13	0.752575	0.198019	2.86081	0.195077	0.288328	32	4322	32
KIRP	MMP14	11296.9	2231.15	5.06308	3.80166e-06	3.5078e-05	32	4323	32
KIRP	MMP2	1023.29	1387.1	0.737738	0.323877	0.42294	32	4313	32
KIRP	MMP3	2.25548	0.679206	3.02293	0.165493	0.253853	32	4314	32
KIRP	MMP9	588.521	114.702	5.12726	0.0789896	0.140337	32	4318	32
KIRP	PECAM1	667.519	1341.2	0.497742	4.23004e-07	5.77123e-06	32	5175	32
KIRP	SERPINE1	1021.68	1410.88	0.72416	0.379949	0.477028	32	5054	32
KIRP	SPP1	149863	49664.6	3.0175	0.000194898	0.000937435	32	6696	32
KIRP	TIMP2	11194.3	5451.24	2.05352	0.000211106	0.00100199	32	7077	32
KIRP	TNF	22.9468	19.7989	1.15819	0.616638	0.694583	32	7124	32
KIRP	TNFRSF11B	2800.52	1438.39	1.94692	0.00664127	0.0179291	32	4982	32
LIHC	FGF2	187.579	147.452	1.27195	0.441273	0.523004	50	2247	50
LIHC	ICAM1	2969.71	3919.86	0.757611	0.133093	0.208853	50	3383	50
LIHC	ICAM3	859.495	1168.16	0.735791	0.00183191	0.00582912	50	3385	50
LIHC	ITGA2	308.991	53.3091	5.78724	1.7965e-05	0.000105698	50	3673	50
LIHC	LCP1	2006.02	2616.98	0.766549	0.0875191	0.149433	50	3936	50
LIHC	MMP1	37.249	12.2096	3.03414	0.0173483	0.0393132	50	4312	50
LIHC	MMP10	18.7648	1.89039	9.47796	0.101557	0.168	50	4319	50
LIHC	MMP12	50.0537	3.1851	15.267	0.0903523	0.153139	50	4321	50
LIHC	MMP13	0.36494	0.072288	2.69862	0.0983329	0.163766	50	4322	50
LIHC	MMP14	2947.57	972.629	3.0303	0.0147947	0.0343818	50	4323	50
LIHC	MMP2	981.431	706.526	1.38904	0.167797	0.249165	50	4313	50
LIHC	MMP3	7.69473	3.49436	2.1686	0.30064	0.39423	50	4314	50
LIHC	MMP9	439.297	142.586	3.07947	0.00405992	0.0115593	50	4318	50
LIHC	PECAM1	1091.72	644.994	1.69251	7.79937e-06	5.09e-05	50	5175	50
LIHC	SERPINE1	5604.26	17813.2	0.314617	4.6193e-05	0.000238925	50	5054	50
LIHC	SPP1	43264.7	999.05	43.3016	0.00192022	0.0060651	50	6696	50
LIHC	TIMP2	3809.83	2945.37	1.29349	0.436056	0.518253	50	7077	50
LIHC	TNF	7.5961	15.8088	0.483764	0.00635938	0.0168416	50	7124	50
LIHC	TNFRSF11B	169.367	435.123	0.38938	6.05407e-09	1.08347e-07	50	4982	50
LUAD	FGF2	117.675	422.789	0.278502	1.14939e-12	1.55913e-11	58	2247	58
LUAD	ICAM1	10093	19162.9	0.526696	0.00120163	0.00276611	58	3383	58
LUAD	ICAM3	642.615	570.598	1.12619	0.227384	0.289128	58	3385	58
LUAD	ITGA2	3004.32	774.814	3.8771	8.38687e-07	3.52765e-06	58	3673	58
LUAD	LCP1	5548.93	9607.25	0.577582	1.67758e-09	1.16571e-08	58	3936	58
LUAD	MMP1	1902.43	61.0897	31.0923	1.2652e-05	4.286e-05	58	4312	58
LUAD	MMP10	136.968	10.3925	13.0634	0.0223069	0.0382642	58	4319	58
LUAD	MMP12	913.622	35.0319	26.0083	2.81144e-06	1.0731e-05	58	4321	58
LUAD	MMP13	1190.8	9.46032	124.567	0.0270011	0.0453918	58	4322	58
LUAD	MMP14	8842.55	3105.07	2.84771	5.98817e-09	3.74426e-08	58	4323	58
LUAD	MMP2	10303.2	5968.98	1.72611	5.0572e-05	0.000152472	58	4313	58
LUAD	MMP3	60.7175	2.0451	28.3518	0.000357478	0.00091384	58	4314	58
LUAD	MMP9	2491.22	473.681	5.25838	1.88499e-08	1.06797e-07	58	4318	58
LUAD	PECAM1	1451.26	6159.53	0.235624	8.52281e-32	9.92155e-29	58	5175	58
LUAD	SERPINE1	3609.64	3777.67	0.955522	0.865594	0.889044	58	5054	58
LUAD	SPP1	15396	474.596	32.4335	2.7764e-05	8.7772e-05	58	6696	58
LUAD	TIMP2	9205.41	11448.6	0.804064	0.00224854	0.00489858	58	7077	58
LUAD	TNF	69.3303	60.8297	1.13951	0.756252	0.795484	58	7124	58
LUAD	TNFRSF11B	174.305	130.975	1.33057	0.11502	0.161859	58	4982	58
LUSC	FGF2	131.748	413.171	0.319034	1.61278e-12	1.47637e-11	51	2247	51
LUSC	ICAM1	5014.09	23951.2	0.209349	1.80177e-07	6.94007e-07	51	3383	51
LUSC	ICAM3	404.973	713.678	0.567505	6.2909e-05	0.000158511	51	3385	51
LUSC	ITGA2	2996.18	1067.8	2.80578	1.27196e-07	5.02392e-07	51	3673	51
LUSC	LCP1	4320.2	10567.7	0.408819	1.20397e-15	1.95097e-14	51	3936	51
LUSC	MMP1	5482.13	109.481	50.0289	0.000123286	0.000296014	51	4312	51
LUSC	MMP10	2837.32	23.6471	119.485	0.000510706	0.0011029	51	4319	51
LUSC	MMP12	1964.17	37.8128	51.8102	3.1576e-05	8.3711e-05	51	4321	51
LUSC	MMP13	3992.09	11.9326	331.782	0.106375	0.144896	51	4322	51
LUSC	MMP14	12720.4	3820.98	3.32904	9.97858e-08	4.01872e-07	51	4323	51
LUSC	MMP2	11995.5	9363.57	1.28108	0.160467	0.208383	51	4313	51
LUSC	MMP3	400.99	3.82343	102.229	0.00169168	0.00333191	51	4314	51
LUSC	MMP9	4316.84	597.651	7.22196	0.000666766	0.0014099	51	4318	51
LUSC	PECAM1	958.351	6334.73	0.151299	1.0361e-32	1.03004e-29	51	5175	51
LUSC	SERPINE1	6607.55	6204.24	1.065	0.785592	0.816824	51	5054	51
LUSC	SPP1	16571.4	996.048	16.6356	3.89683e-07	1.4175e-06	51	6696	51
LUSC	TIMP2	7147.18	12410.8	0.575886	3.22872e-08	1.41808e-07	51	7077	51
LUSC	TNF	84.2361	78.7021	1.07023	0.848861	0.871567	51	7124	51
LUSC	TNFRSF11B	124.442	171.52	0.725687	0.334225	0.39024	51	4982	51
PRAD	FGF2	229.224	518.491	0.442206	6.92426e-08	1.0377e-06	52	2247	52
PRAD	ICAM1	711.558	554.247	1.28378	0.0497336	0.0958961	52	3383	52
PRAD	ICAM3	412.519	316.578	1.30296	8.2819e-05	0.000418491	52	3385	52
PRAD	ITGA2	592.789	1086.86	0.545457	1.92687e-06	1.6641e-05	52	3673	52
PRAD	LCP1	11072.6	8082.76	1.3699	0.000232384	0.00101664	52	3936	52
PRAD	MMP1	30.7761	41.2899	0.74598	0.532814	0.627776	52	4312	52
PRAD	MMP10	171.234	72.6549	2.35495	0.00767375	0.0199337	52	4319	52
PRAD	MMP12	15.9618	14.509	1.09944	0.789852	0.84555	52	4321	52
PRAD	MMP13	10.671	17.285	0.619559	0.308527	0.415757	52	4322	52
PRAD	MMP14	1618.95	2910.98	0.556168	2.39893e-12	2.41987e-10	52	4323	52
PRAD	MMP2	1910.03	3449.09	0.55379	3.24253e-06	2.6003e-05	52	4313	52
PRAD	MMP3	5.62733	6.45027	0.874365	0.681139	0.757769	52	4314	52
PRAD	MMP9	211.478	103.724	2.03784	0.00262033	0.00800342	52	4318	52
PRAD	PECAM1	500.487	508.545	0.984159	0.877487	0.912238	52	5175	52
PRAD	SERPINE1	907.081	810.735	1.11882	0.708311	0.780358	52	5054	52
PRAD	SPP1	413.042	303.85	1.35924	0.291846	0.398158	52	6696	52
PRAD	TIMP2	4778.91	8979.65	0.532199	1.96226e-07	2.42876e-06	52	7077	52
PRAD	TNF	5.49871	9.2511	0.598722	0.0153365	0.0357723	52	7124	52
PRAD	TNFRSF11B	40.342	41.3468	0.975758	0.866975	0.904432	52	4982	52
STAD	FGF2	135.596	780.355	0.173868	0.000553955	0.00415446	32	2247	32
STAD	ICAM1	2787.17	1123.91	2.47975	0.000225154	0.00219359	32	3383	32
STAD	ICAM3	711.77	846.484	0.840873	0.47797	0.597694	32	3385	32
STAD	ITGA2	1903.21	1033.11	1.84214	0.00501925	0.0205813	32	3673	32
STAD	LCP1	3682.8	2285.08	1.61164	0.0631783	0.137366	32	3936	32
STAD	MMP1	5934.4	963.281	6.16007	0.117629	0.218005	32	4312	32
STAD	MMP10	79.0005	8.27703	9.44254	0.00901862	0.032049	32	4319	32
STAD	MMP12	1142.14	258.134	4.42328	0.0106732	0.0363723	32	4321	32
STAD	MMP13	26.2215	1.24132	19.6236	0.00949274	0.0333473	32	4322	32
STAD	MMP14	6953.57	3027.01	2.29713	2.31545e-07	1.3741e-05	32	4323	32
STAD	MMP2	6891.18	6116.93	1.12657	0.498425	0.614666	32	4313	32
STAD	MMP3	782.039	25.357	30.7239	0.00903483	0.0321003	32	4314	32
STAD	MMP9	1326.67	323.449	4.10067	0.00182136	0.00971099	32	4318	32
STAD	PECAM1	1049.71	980.116	1.071	0.564257	0.672567	32	5175	32
STAD	SERPINE1	2737.19	699.227	3.91418	0.0010739	0.00661913	32	5054	32
STAD	SPP1	2610.89	266.294	9.80126	0.00149113	0.00840219	32	6696	32
STAD	TIMP2	7009.5	9517.61	0.73648	0.0998207	0.192599	32	7077	32
STAD	TNF	41.7013	26.7728	1.55553	0.220213	0.345515	32	7124	32
STAD	TNFRSF11B	161.644	34.6685	4.65203	0.000200606	0.00202064	32	4982	32
THCA	FGF2	285.821	148.462	1.9246	2.98937e-06	1.2966e-05	59	2247	59
THCA	ICAM1	3883.25	905.867	4.28642	1.85472e-12	2.9098e-11	59	3383	59
THCA	ICAM3	461.179	491.006	0.939267	0.790073	0.833717	59	3385	59
THCA	ITGA2	1749.56	209.679	8.3405	5.99993e-10	5.55085e-09	59	3673	59
THCA	LCP1	2269.4	2487.69	0.912255	0.724464	0.778966	59	3936	59
THCA	MMP1	26.9192	2.22581	11.6171	3.16543e-06	1.3669e-05	59	4312	59
THCA	MMP10	5.73118	0.397758	11.7149	0.000873473	0.00226594	59	4319	59
THCA	MMP12	33.9434	12.407	2.72195	0.00461481	0.0101686	59	4321	59
THCA	MMP13	42.4618	0.342539	96.1765	0.0179931	0.0341862	59	4322	59
THCA	MMP14	3613.48	1835.4	1.96872	3.43388e-07	1.7896e-06	59	4323	59
THCA	MMP2	2465.28	2123.5	1.16094	0.304397	0.390646	59	4313	59
THCA	MMP3	15.0623	0.462815	26.9401	0.220838	0.299484	59	4314	59
THCA	MMP9	1176.21	747.182	1.57411	0.0892895	0.139794	59	4318	59
THCA	PECAM1	1462.51	1153.6	1.26775	0.0130064	0.0256672	59	5175	59
THCA	SERPINE1	1240.67	808.262	1.53492	0.0903906	0.141239	59	5054	59
THCA	SPP1	1197.07	436.377	2.7428	0.000425084	0.00118006	59	6696	59
THCA	TIMP2	4440.47	4416.38	1.00545	0.943385	0.956664	59	7077	59
THCA	TNF	16.0704	22.5416	0.714189	0.19512	0.270134	59	7124	59
THCA	TNFRSF11B	972.952	3729.49	0.2609	2.49219e-19	2.57696e-17	59	4982	59
