# Supplementary material for: Pan-cancer analyses of senescence-related genes in extracellular matrix characterization in cancer
Source: Discov Oncol. 2023 Nov 20;14:208. doi: 10.1007/s12672-023-00828-7 (PMC10660488; doi:10.1007/s12672-023-00828-7)
Supplement: Supplementary file 14 — Supplementary file14 (XLSX 10 KB) [file 12672_2023_828_MOESM14_ESM.xlsx]

## Sheet: SheetName
Table S9 GSEA score of gene set in pan-cancer
cancertype	ES	NES	pval	padj	log2err
PRAD	-0.325617	-0.823421	0.67658	0.67658	0.0603786
BLCA	0.492935	1.20834	0.207207	0.207207	0.114267
KIRC	0.576436	1.38728	0.0747922	0.0747922	0.191892
LIHC	0.638244	1.39948	0.0611111	0.0611111	0.190023
LUAD	0.647952	1.4438	0.0467626	0.0467626	0.227987
LUSC	0.641113	1.50504	0.0333893	0.0333893	0.321776
KICH	0.564082	1.53706	0.0766004	0.0766004	0.287805
KIRP	0.629767	1.54088	0.0155231	0.0155231	0.38073
BRCA	0.65469	1.58398	0.0151979	0.0151979	0.38073
THCA	0.71772	1.65551	0.00763892	0.00763892	0.407018
STAD	0.737479	1.75567	0.000977044	0.000977044	0.45506
COAD	0.74024	1.85317	0.000576594	0.000576594	0.477271
ESCA	0.796938	1.90682	5.2902e-05	5.2902e-05	0.557332
HNSC	0.775801	1.94119	0.00011614	0.00011614	0.538434
