# Supplementary material for: Pan-cancer analyses of senescence-related genes in extracellular matrix characterization in cancer
Source: Discov Oncol. 2023 Nov 20;14:208. doi: 10.1007/s12672-023-00828-7 (PMC10660488; doi:10.1007/s12672-023-00828-7)
Supplement: Supplementary file 15 — Supplementary file15 (XLSX 21 KB) [file 12672_2023_828_MOESM15_ESM.xlsx]

## Sheet: SheetName
Table S10 The difference of gene expression between subtypes in pan-cancer
cancertype	symbol	pval	Subtype1	Subtype2	Subtype3	Subtype4	Subtype5	Subtype6	entrez
BLCA	FGF2	0.00645262	Non-Papillary (110/148)	Papillary (99/66)					0
BLCA	ICAM1	0.00058997	Non-Papillary (2400/148)	Papillary (1600/66)					0
BLCA	ICAM3	0.112193	Non-Papillary (400/148)	Papillary (360/66)					0
BLCA	ITGA2	0.5241	Non-Papillary (1700/148)	Papillary (1600/66)					0
BLCA	LCP1	0.00477469	Non-Papillary (3500/148)	Papillary (2500/66)					0
BLCA	MMP1	0.374525	Non-Papillary (3000/148)	Papillary (2800/66)					0
BLCA	MMP10	0.876524	Non-Papillary (440/148)	Papillary (520/66)					0
BLCA	MMP12	0.00533632	Non-Papillary (1300/148)	Papillary (700/66)					0
BLCA	MMP13	0.952347	Non-Papillary (1900/148)	Papillary (480/66)					0
BLCA	MMP14	0.0791327	Non-Papillary (13000/148)	Papillary (11000/66)					0
BLCA	MMP2	0.0160263	Non-Papillary (10000/148)	Papillary (7900/66)					0
BLCA	MMP3	0.000294048	Non-Papillary (890/148)	Papillary (240/66)					0
BLCA	MMP9	0.000319774	Non-Papillary (7000/148)	Papillary (900/66)					0
BLCA	PECAM1	0.466691	Non-Papillary (910/148)	Papillary (900/66)					0
BLCA	SERPINE1	0.017556	Non-Papillary (7000/148)	Papillary (4600/66)					0
BLCA	SPP1	0.000740752	Non-Papillary (14000/148)	Papillary (2000/66)					0
BLCA	TIMP2	0.000376969	Non-Papillary (5900/148)	Papillary (4400/66)					0
BLCA	TNF	0.063434	Non-Papillary (47/148)	Papillary (28/66)					0
BLCA	TNFRSF11B	0.951395	Non-Papillary (140/148)	Papillary (140/66)					0
BRCA	FGF2	2.06866e-17	Basal (340/140)	Her2 (64/67)	LumA (280/420)	LumB (82/193)	Normal_like (730/23)		0
BRCA	ICAM1	2.016e-10	Basal (3100/140)	Her2 (1400/67)	LumA (1200/420)	LumB (1100/193)	Normal_like (1700/23)		0
BRCA	ICAM3	0.0195737	Basal (390/140)	Her2 (430/67)	LumA (360/420)	LumB (330/193)	Normal_like (490/23)		0
BRCA	ITGA2	3.43562e-11	Basal (830/140)	Her2 (890/67)	LumA (1500/420)	LumB (1100/193)	Normal_like (2200/23)		0
BRCA	LCP1	3.43285e-06	Basal (5400/140)	Her2 (4100/67)	LumA (3300/420)	LumB (3300/193)	Normal_like (5900/23)		0
BRCA	MMP1	5.03883e-09	Basal (1800/140)	Her2 (2500/67)	LumA (280/420)	LumB (670/193)	Normal_like (510/23)		0
BRCA	MMP10	0.000508762	Basal (61/140)	Her2 (140/67)	LumA (160/420)	LumB (76/193)	Normal_like (110/23)		0
BRCA	MMP12	6.06893e-07	Basal (460/140)	Her2 (170/67)	LumA (49/420)	LumB (78/193)	Normal_like (66/23)		0
BRCA	MMP13	0.131264	Basal (560/140)	Her2 (960/67)	LumA (620/420)	LumB (820/193)	Normal_like (800/23)		0
BRCA	MMP14	0.000236346	Basal (9100/140)	Her2 (11000/67)	LumA (9700/420)	LumB (7300/193)	Normal_like (10000/23)		0
BRCA	MMP2	3.10633e-11	Basal (6700/140)	Her2 (9500/67)	LumA (11000/420)	LumB (7400/193)	Normal_like (15000/23)		0
BRCA	MMP3	0.00236991	Basal (410/140)	Her2 (570/67)	LumA (270/420)	LumB (230/193)	Normal_like (770/23)		0
BRCA	MMP9	0.0764973	Basal (2800/140)	Her2 (2100/67)	LumA (2100/420)	LumB (1900/193)	Normal_like (3500/23)		0
BRCA	PECAM1	6.0397e-12	Basal (900/140)	Her2 (1100/67)	LumA (1200/420)	LumB (860/193)	Normal_like (2100/23)		0
BRCA	SERPINE1	4.38611e-08	Basal (1100/140)	Her2 (1300/67)	LumA (1900/420)	LumB (1100/193)	Normal_like (2800/23)		0
BRCA	SPP1	0.00813238	Basal (7800/140)	Her2 (5100/67)	LumA (5000/420)	LumB (6200/193)	Normal_like (8900/23)		0
BRCA	TIMP2	3.3111e-05	Basal (8900/140)	Her2 (9100/67)	LumA (11000/420)	LumB (8100/193)	Normal_like (13000/23)		0
BRCA	TNF	2.95947e-09	Basal (120/140)	Her2 (34/67)	LumA (35/420)	LumB (37/193)	Normal_like (40/23)		0
BRCA	TNFRSF11B	6.1081e-05	Basal (230/140)	Her2 (94/67)	LumA (170/420)	LumB (98/193)	Normal_like (590/23)		0
COAD	FGF2	0.66256	MSI-H (56/6)	MSI-L (59/6)	MSS (78/15)				0
COAD	ICAM1	0.0712157	MSI-H (2600/6)	MSI-L (1000/6)	MSS (840/15)				0
COAD	ICAM3	0.844326	MSI-H (550/6)	MSI-L (580/6)	MSS (530/15)				0
COAD	ITGA2	0.285371	MSI-H (1500/6)	MSI-L (1400/6)	MSS (1900/15)				0
COAD	LCP1	0.233475	MSI-H (2100/6)	MSI-L (1300/6)	MSS (1100/15)				0
COAD	MMP1	0.878426	MSI-H (2800/6)	MSI-L (2400/6)	MSS (2100/15)				0
COAD	MMP10	0.0389483	MSI-H (22/6)	MSI-L (78/6)	MSS (87/15)				0
COAD	MMP12	0.252412	MSI-H (2300/6)	MSI-L (1800/6)	MSS (1000/15)				0
COAD	MMP13	0.578305	MSI-H (64/6)	MSI-L (42/6)	MSS (21/15)				0
COAD	MMP14	0.0717243	MSI-H (7400/6)	MSI-L (5200/6)	MSS (3900/15)				0
COAD	MMP2	0.365984	MSI-H (7100/6)	MSI-L (4200/6)	MSS (3700/15)				0
COAD	MMP3	0.865123	MSI-H (760/6)	MSI-L (1300/6)	MSS (920/15)				0
COAD	MMP9	0.611457	MSI-H (1500/6)	MSI-L (940/6)	MSS (950/15)				0
COAD	PECAM1	0.303854	MSI-H (670/6)	MSI-L (420/6)	MSS (390/15)				0
COAD	SERPINE1	0.880966	MSI-H (690/6)	MSI-L (960/6)	MSS (700/15)				0
COAD	SPP1	0.392205	MSI-H (5100/6)	MSI-L (2200/6)	MSS (2800/15)				0
COAD	TIMP2	0.316353	MSI-H (5000/6)	MSI-L (3500/6)	MSS (2900/15)				0
COAD	TNF	0.663278	MSI-H (27/6)	MSI-L (37/6)	MSS (24/15)				0
COAD	TNFRSF11B	0.410109	MSI-H (190/6)	MSI-L (370/6)	MSS (230/15)				0
GBM	FGF2	0.00590723	Classical (900/43)	G-CIMP (880/8)	Mesenchymal (900/55)	Neural (900/28)	Proneural (660/31)		0
GBM	ICAM1	2.27566e-10	Classical (990/43)	G-CIMP (310/8)	Mesenchymal (2100/55)	Neural (960/28)	Proneural (820/31)		0
GBM	ICAM3	1.29021e-07	Classical (220/43)	G-CIMP (120/8)	Mesenchymal (260/55)	Neural (260/28)	Proneural (170/31)		0
GBM	ITGA2	1.437e-05	Classical (540/43)	G-CIMP (220/8)	Mesenchymal (640/55)	Neural (470/28)	Proneural (280/31)		0
GBM	LCP1	2.43086e-06	Classical (930/43)	G-CIMP (1100/8)	Mesenchymal (2200/55)	Neural (1600/28)	Proneural (1100/31)		0
GBM	MMP1	0.218192	Classical (20/43)	G-CIMP (38/8)	Mesenchymal (77/55)	Neural (26/28)	Proneural (59/31)		0
GBM	MMP10	0.560642	Classical (4.2/43)	G-CIMP (5.1/8)	Mesenchymal (9.9/55)	Neural (3.2/28)	Proneural (4.7/31)		0
GBM	MMP12	0.121734	Classical (2.9/43)	G-CIMP (52/8)	Mesenchymal (80/55)	Neural (27/28)	Proneural (11/31)		0
GBM	MMP13	0.106511	Classical (6.4/43)	G-CIMP (2.8/8)	Mesenchymal (460/55)	Neural (11/28)	Proneural (18/31)		0
GBM	MMP14	6.51197e-10	Classical (5000/43)	G-CIMP (1400/8)	Mesenchymal (8400/55)	Neural (3200/28)	Proneural (3100/31)		0
GBM	MMP2	0.000559472	Classical (3600/43)	G-CIMP (1900/8)	Mesenchymal (3700/55)	Neural (1900/28)	Proneural (4100/31)		0
GBM	MMP3	0.0935135	Classical (4.5/43)	G-CIMP (11/8)	Mesenchymal (20/55)	Neural (8.1/28)	Proneural (39/31)		0
GBM	MMP9	0.0197949	Classical (740/43)	G-CIMP (380/8)	Mesenchymal (1600/55)	Neural (870/28)	Proneural (1300/31)		0
GBM	PECAM1	0.00471206	Classical (720/43)	G-CIMP (630/8)	Mesenchymal (910/55)	Neural (970/28)	Proneural (670/31)		0
GBM	SERPINE1	3.57217e-07	Classical (3300/43)	G-CIMP (1100/8)	Mesenchymal (10000/55)	Neural (2800/28)	Proneural (3200/31)		0
GBM	SPP1	0.000752001	Classical (49000/43)	G-CIMP (39000/8)	Mesenchymal (110000/55)	Neural (95000/28)	Proneural (60000/31)		0
GBM	TIMP2	0.00404443	Classical (14000/43)	G-CIMP (15000/8)	Mesenchymal (15000/55)	Neural (11000/28)	Proneural (15000/31)		0
GBM	TNF	0.000496621	Classical (17/43)	G-CIMP (63/8)	Mesenchymal (35/55)	Neural (71/28)	Proneural (34/31)		0
GBM	TNFRSF11B	1.08296e-12	Classical (220/43)	G-CIMP (37/8)	Mesenchymal (350/55)	Neural (260/28)	Proneural (130/31)		0
HNSC	FGF2	0.551761	Negative (130/66)	Positive (210/23)					0
HNSC	ICAM1	0.322786	Negative (3000/66)	Positive (3800/23)					0
HNSC	ICAM3	0.000635241	Negative (380/66)	Positive (640/23)					0
HNSC	ITGA2	0.490922	Negative (3500/66)	Positive (4100/23)					0
HNSC	LCP1	0.118655	Negative (3600/66)	Positive (5700/23)					0
HNSC	MMP1	3.12685e-08	Negative (21000/66)	Positive (4300/23)					0
HNSC	MMP10	1.12296e-06	Negative (3500/66)	Positive (8700/23)					0
HNSC	MMP12	0.224871	Negative (1800/66)	Positive (1600/23)					0
HNSC	MMP13	1.63659e-06	Negative (3900/66)	Positive (3800/23)					0
HNSC	MMP14	0.00340319	Negative (15000/66)	Positive (9800/23)					0
HNSC	MMP2	1.07091e-06	Negative (11000/66)	Positive (2800/23)					0
HNSC	MMP3	5.73375e-07	Negative (4400/66)	Positive (960/23)					0
HNSC	MMP9	0.250938	Negative (6400/66)	Positive (3400/23)					0
HNSC	PECAM1	0.774995	Negative (780/66)	Positive (750/23)					0
HNSC	SERPINE1	2.73926e-07	Negative (8800/66)	Positive (3700/23)					0
HNSC	SPP1	0.0907126	Negative (6600/66)	Positive (2600/23)					0
HNSC	TIMP2	3.6533e-05	Negative (7100/66)	Positive (2500/23)					0
HNSC	TNF	0.14502	Negative (89/66)	Positive (100/23)					0
HNSC	TNFRSF11B	0.718232	Negative (71/66)	Positive (71/23)					0
KIRC	FGF2	0.218754	1 (550/147)	2 (540/90)	3 (730/94)	4 (520/86)			0
KIRC	ICAM1	7.48446e-08	1 (3100/147)	2 (3500/90)	3 (4900/94)	4 (4300/86)			0
KIRC	ICAM3	1.31515e-21	1 (360/147)	2 (610/90)	3 (500/94)	4 (650/86)			0
KIRC	ITGA2	7.22141e-17	1 (1200/147)	2 (760/90)	3 (1100/94)	4 (670/86)			0
KIRC	LCP1	0.0004725	1 (3500/147)	2 (3800/90)	3 (5200/94)	4 (3900/86)			0
KIRC	MMP1	0.158145	1 (160/147)	2 (230/90)	3 (290/94)	4 (840/86)			0
KIRC	MMP10	0.0170747	1 (1.3/147)	2 (3.2/90)	3 (6.3/94)	4 (1.5/86)			0
KIRC	MMP12	0.00333347	1 (5.1/147)	2 (36/90)	3 (67/94)	4 (56/86)			0
KIRC	MMP13	0.0401628	1 (2/147)	2 (14/90)	3 (120/94)	4 (10/86)			0
KIRC	MMP14	1.4945e-05	1 (4900/147)	2 (4900/90)	3 (8500/94)	4 (6000/86)			0
KIRC	MMP2	1.7913e-05	1 (1600/147)	2 (1600/90)	3 (3600/94)	4 (1600/86)			0
KIRC	MMP3	0.200189	1 (2.3/147)	2 (3.3/90)	3 (9.9/94)	4 (13/86)			0
KIRC	MMP9	3.2298e-05	1 (240/147)	2 (640/90)	3 (2000/94)	4 (680/86)			0
KIRC	PECAM1	0.0152503	1 (5100/147)	2 (5400/90)	3 (5200/94)	4 (4400/86)			0
KIRC	SERPINE1	1.0593e-08	1 (4500/147)	2 (7500/90)	3 (19000/94)	4 (6900/86)			0
KIRC	SPP1	0.000102346	1 (28000/147)	2 (32000/90)	3 (46000/94)	4 (43000/86)			0
KIRC	TIMP2	1.18687e-06	1 (6200/147)	2 (6100/90)	3 (9200/94)	4 (5100/86)			0
KIRC	TNF	0.070789	1 (20/147)	2 (27/90)	3 (24/94)	4 (18/86)			0
KIRC	TNFRSF11B	0.0444108	1 (840/147)	2 (690/90)	3 (850/94)	4 (1100/86)			0
LUAD	FGF2	0.000308872	1 (64/22)	2 (59/32)	3 (59/51)	4 (93/32)	5 (110/52)	6 (200/41)	0
LUAD	ICAM1	1.74966e-11	1 (5500/22)	2 (5000/32)	3 (18000/51)	4 (10000/32)	5 (14000/52)	6 (7200/41)	0
LUAD	ICAM3	5.12645e-09	1 (380/22)	2 (420/32)	3 (620/51)	4 (520/32)	5 (720/52)	6 (810/41)	0
LUAD	ITGA2	1.07086e-12	1 (670/22)	2 (1300/32)	3 (3400/51)	4 (2500/32)	5 (2800/52)	6 (2600/41)	0
LUAD	LCP1	2.30468e-15	1 (1900/22)	2 (3400/32)	3 (3700/51)	4 (4100/32)	5 (6300/52)	6 (7400/41)	0
LUAD	MMP1	0.0266837	1 (760/22)	2 (1200/32)	3 (1100/51)	4 (7600/32)	5 (1700/52)	6 (3300/41)	0
LUAD	MMP10	4.7192e-05	1 (23/22)	2 (230/32)	3 (96/51)	4 (77/32)	5 (88/52)	6 (270/41)	0
LUAD	MMP12	3.86086e-15	1 (51/22)	2 (820/32)	3 (510/51)	4 (460/32)	5 (370/52)	6 (1100/41)	0
LUAD	MMP13	2.38942e-06	1 (74/22)	2 (240/32)	3 (2300/51)	4 (540/32)	5 (710/52)	6 (380/41)	0
LUAD	MMP14	1.04017e-12	1 (2800/22)	2 (6600/32)	3 (7700/51)	4 (4800/32)	5 (6300/52)	6 (10000/41)	0
LUAD	MMP2	3.87615e-08	1 (3400/22)	2 (7800/32)	3 (6800/51)	4 (4800/32)	5 (9300/52)	6 (10000/41)	0
LUAD	MMP3	4.98556e-09	1 (1.2/22)	2 (29/32)	3 (46/51)	4 (7.9/32)	5 (48/52)	6 (100/41)	0
LUAD	MMP9	1.4871e-10	1 (390/22)	2 (1200/32)	3 (1800/51)	4 (1400/32)	5 (2000/52)	6 (3500/41)	0
LUAD	PECAM1	0.000107137	1 (1400/22)	2 (1200/32)	3 (1100/51)	4 (1200/32)	5 (1600/52)	6 (1700/41)	0
LUAD	SERPINE1	0.00261582	1 (1300/22)	2 (1900/32)	3 (2200/51)	4 (1800/32)	5 (1900/52)	6 (5900/41)	0
LUAD	SPP1	3.65512e-11	1 (2100/22)	2 (12000/32)	3 (16000/51)	4 (11000/32)	5 (20000/52)	6 (19000/41)	0
LUAD	TIMP2	6.86164e-08	1 (4100/22)	2 (6600/32)	3 (7900/51)	4 (5100/32)	5 (8700/52)	6 (9600/41)	0
LUAD	TNF	1.1208e-05	1 (12/22)	2 (22/32)	3 (34/51)	4 (23/32)	5 (57/52)	6 (52/41)	0
LUAD	TNFRSF11B	0.000289535	1 (59/22)	2 (160/32)	3 (120/51)	4 (140/32)	5 (140/52)	6 (200/41)	0
LUSC	FGF2	0.000349299	basal (95/43)	classical (150/65)	primitive (230/27)	secretory (230/44)			0
LUSC	ICAM1	1.65422e-06	basal (4100/43)	classical (2100/65)	primitive (1900/27)	secretory (8700/44)			0
LUSC	ICAM3	6.05172e-09	basal (560/43)	classical (330/65)	primitive (300/27)	secretory (730/44)			0
LUSC	ITGA2	0.0466581	basal (3300/43)	classical (2600/65)	primitive (1900/27)	secretory (3100/44)			0
LUSC	LCP1	3.96934e-08	basal (3900/43)	classical (2900/65)	primitive (2900/27)	secretory (7500/44)			0
LUSC	MMP1	0.000514372	basal (12000/43)	classical (3900/65)	primitive (1800/27)	secretory (6800/44)			0
LUSC	MMP10	0.000223595	basal (5800/43)	classical (750/65)	primitive (1700/27)	secretory (4800/44)			0
LUSC	MMP12	0.255999	basal (2300/43)	classical (2300/65)	primitive (1800/27)	secretory (3300/44)			0
LUSC	MMP13	0.000123186	basal (3600/43)	classical (180/65)	primitive (170/27)	secretory (7100/44)			0
LUSC	MMP14	8.0595e-05	basal (13000/43)	classical (8200/65)	primitive (7100/27)	secretory (14000/44)			0
LUSC	MMP2	6.56013e-06	basal (10000/43)	classical (6700/65)	primitive (5200/27)	secretory (14000/44)			0
LUSC	MMP3	0.020834	basal (280/43)	classical (370/65)	primitive (120/27)	secretory (370/44)			0
LUSC	MMP9	0.00254383	basal (2400/43)	classical (1700/65)	primitive (1400/27)	secretory (5300/44)			0
LUSC	PECAM1	5.37625e-11	basal (940/43)	classical (640/65)	primitive (660/27)	secretory (1400/44)			0
LUSC	SERPINE1	0.000404546	basal (6800/43)	classical (4000/65)	primitive (2800/27)	secretory (6300/44)			0
LUSC	SPP1	0.00364539	basal (21000/43)	classical (41000/65)	primitive (15000/27)	secretory (18000/44)			0
LUSC	TIMP2	1.7719e-06	basal (5700/43)	classical (4400/65)	primitive (4300/27)	secretory (9400/44)			0
LUSC	TNF	0.000489918	basal (46/43)	classical (29/65)	primitive (23/27)	secretory (120/44)			0
LUSC	TNFRSF11B	0.0616968	basal (150/43)	classical (93/65)	primitive (160/27)	secretory (240/44)			0
STAD	FGF2	1.1034e-07	CIN (180/138)	EBV (110/25)	GS (490/54)	MSI (130/60)			0
STAD	ICAM1	0.000262108	CIN (2100/138)	EBV (5700/25)	GS (2200/54)	MSI (3300/60)			0
STAD	ICAM3	0.00527264	CIN (420/138)	EBV (590/25)	GS (760/54)	MSI (430/60)			0
STAD	ITGA2	0.0112036	CIN (2100/138)	EBV (2600/25)	GS (1700/54)	MSI (2500/60)			0
STAD	LCP1	0.000601401	CIN (2700/138)	EBV (5300/25)	GS (5300/54)	MSI (3400/60)			0
STAD	MMP1	0.0631306	CIN (3700/138)	EBV (3400/25)	GS (1900/54)	MSI (4700/60)			0
STAD	MMP10	0.456005	CIN (93/138)	EBV (61/25)	GS (120/54)	MSI (72/60)			0
STAD	MMP12	0.000298225	CIN (1100/138)	EBV (1600/25)	GS (670/54)	MSI (2600/60)			0
STAD	MMP13	0.000639708	CIN (64/138)	EBV (8.9/25)	GS (17/54)	MSI (88/60)			0
STAD	MMP14	0.229991	CIN (6800/138)	EBV (6500/25)	GS (8300/54)	MSI (7200/60)			0
STAD	MMP2	1.67467e-06	CIN (8000/138)	EBV (4600/25)	GS (14000/54)	MSI (7300/60)			0
STAD	MMP3	0.00213332	CIN (810/138)	EBV (220/25)	GS (530/54)	MSI (890/60)			0
STAD	MMP9	0.565521	CIN (1200/138)	EBV (1000/25)	GS (1200/54)	MSI (1400/60)			0
STAD	PECAM1	7.13282e-09	CIN (990/138)	EBV (1100/25)	GS (1600/54)	MSI (790/60)			0
STAD	SERPINE1	0.0454113	CIN (2700/138)	EBV (1800/25)	GS (3000/54)	MSI (2200/60)			0
STAD	SPP1	0.205131	CIN (4500/138)	EBV (9000/25)	GS (3200/54)	MSI (6900/60)			0
STAD	TIMP2	6.9193e-09	CIN (8400/138)	EBV (5100/25)	GS (13000/54)	MSI (6700/60)			0
STAD	TNF	0.144611	CIN (36/138)	EBV (25/25)	GS (37/54)	MSI (40/60)			0
STAD	TNFRSF11B	1.93573e-08	CIN (550/138)	EBV (43/25)	GS (190/54)	MSI (75/60)			0
