# Supplementary material for: Pan-cancer analyses of senescence-related genes in extracellular matrix characterization in cancer
Source: Discov Oncol. 2023 Nov 20;14:208. doi: 10.1007/s12672-023-00828-7 (PMC10660488; doi:10.1007/s12672-023-00828-7)
Supplement: Supplementary file 16 — Supplementary file16 (XLSX 58 KB) [file 12672_2023_828_MOESM16_ESM.xlsx]

## Sheet: SheetName
Table S11 The difference of mRNA expression between stages in pan-cancer
cancertype	symbol	stagetype	stage1	stage2	stage3	stage4	pval	fdr	entrez
ACC	FGF2	pathologic_stage	89/9	100/37	81/16	220/15	0.108945	0.416468	2247
ACC	ICAM1	pathologic_stage	580/9	370/37	600/16	850/15	0.35612	0.642341	3383
ACC	ICAM3	pathologic_stage	330/9	290/37	330/16	380/15	0.332597	0.624947	3385
ACC	ITGA2	pathologic_stage	350/9	910/37	280/16	1300/15	0.00678141	0.15255	3673
ACC	LCP1	pathologic_stage	2600/9	1400/37	1100/16	1600/15	0.0142012	0.204538	3936
ACC	MMP1	pathologic_stage	97/9	34/37	190/16	1000/15	0.494737	0.730969	4312
ACC	MMP10	pathologic_stage	2.4/9	3.8/37	8.9/16	12/15	0.3751	0.656785	4319
ACC	MMP12	pathologic_stage	2.4/9	2.6/37	3.2/16	140/15	0.229106	0.540137	4321
ACC	MMP13	pathologic_stage	2/9	0.7/37	79/16	5.5/15	0.552109	0.764073	4322
ACC	MMP14	pathologic_stage	2900/9	2100/37	7900/16	4100/15	0.0229114	0.246404	4323
ACC	MMP2	pathologic_stage	1100/9	630/37	2000/16	670/15	0.813092	0.904249	4313
ACC	MMP3	pathologic_stage	1.4/9	0.44/37	14/16	0.99/15	0.233614	0.543339	4314
ACC	MMP9	pathologic_stage	180/9	290/37	160/16	630/15	0.221701	0.533813	4318
ACC	PECAM1	pathologic_stage	1900/9	1000/37	1200/16	1100/15	0.345658	0.634362	5175
ACC	SERPINE1	pathologic_stage	990/9	2000/37	4300/16	4500/15	0.231111	0.541679	5054
ACC	SPP1	pathologic_stage	2000/9	2500/37	2500/16	2500/15	0.575008	0.777216	6696
ACC	TIMP2	pathologic_stage	11000/9	5400/37	7800/16	5100/15	0.528104	0.751617	7077
ACC	TNF	pathologic_stage	8/9	5.7/37	1.5/16	4.8/15	0.0449148	0.311844	7124
ACC	TNFRSF11B	pathologic_stage	49/9	35/37	16/16	27/15	0.175766	0.493004	4982
BLCA	FGF2	pathologic_stage		100/130	120/140	110/134	0.000352595	0.00566149	2247
BLCA	ICAM1	pathologic_stage		1900/130	2600/140	2400/134	0.00175079	0.0189688	3383
BLCA	ICAM3	pathologic_stage		390/130	440/140	370/134	0.732563	0.839524	3385
BLCA	ITGA2	pathologic_stage		1400/130	1500/140	1800/134	0.974067	0.986242	3673
BLCA	LCP1	pathologic_stage		3100/130	3700/140	3200/134	0.367353	0.573893	3936
BLCA	MMP1	pathologic_stage		3800/130	2300/140	2300/134	0.421327	0.620053	4312
BLCA	MMP10	pathologic_stage		700/130	420/140	430/134	0.00017077	0.00327766	4319
BLCA	MMP12	pathologic_stage		870/130	800/140	900/134	0.403177	0.605512	4321
BLCA	MMP13	pathologic_stage		780/130	750/140	1700/134	0.679683	0.806478	4322
BLCA	MMP14	pathologic_stage		9300/130	15000/140	13000/134	2.9204e-05	0.000831551	4323
BLCA	MMP2	pathologic_stage		5700/130	12000/140	11000/134	1.88295e-07	1.3739e-05	4313
BLCA	MMP3	pathologic_stage		580/130	440/140	460/134	0.00140869	0.0163112	4314
BLCA	MMP9	pathologic_stage		1200/130	1500/140	7300/134	0.000746126	0.0100527	4318
BLCA	PECAM1	pathologic_stage		780/130	990/140	990/134	0.0128406	0.0749289	5175
BLCA	SERPINE1	pathologic_stage		4100/130	6800/140	8000/134	7.22269e-06	0.000284119	5054
BLCA	SPP1	pathologic_stage		2800/130	6600/140	13000/134	0.000579853	0.00824338	6696
BLCA	TIMP2	pathologic_stage		2900/130	6400/140	6900/134	1.89521e-11	7.52246e-09	7077
BLCA	TNF	pathologic_stage		26/130	45/140	53/134	0.923878	0.957456	7124
BLCA	TNFRSF11B	pathologic_stage		150/130	190/140	140/134	0.0349673	0.141856	4982
BRCA	FGF2	pathologic_stage	300/182	230/626	230/252	110/20	0.00170103	0.0371255	2247
BRCA	ICAM1	pathologic_stage	1700/182	1700/626	1300/252	1400/20	0.03423	0.164656	3383
BRCA	ICAM3	pathologic_stage	430/182	420/626	420/252	520/20	0.479535	0.659388	3385
BRCA	ITGA2	pathologic_stage	1300/182	1100/626	1200/252	800/20	0.0140875	0.105187	3673
BRCA	LCP1	pathologic_stage	3800/182	3800/626	3200/252	2700/20	0.235763	0.451827	3936
BRCA	MMP1	pathologic_stage	640/182	720/626	940/252	790/20	0.273448	0.488708	4312
BRCA	MMP10	pathologic_stage	150/182	110/626	120/252	34/20	0.0197905	0.12572	4319
BRCA	MMP12	pathologic_stage	100/182	160/626	120/252	42/20	0.00530447	0.064514	4321
BRCA	MMP13	pathologic_stage	680/182	730/626	700/252	660/20	0.267967	0.48413	4322
BRCA	MMP14	pathologic_stage	9500/182	9700/626	9800/252	11000/20	0.457945	0.644002	4323
BRCA	MMP2	pathologic_stage	11000/182	9600/626	11000/252	11000/20	0.0355946	0.168149	4313
BRCA	MMP3	pathologic_stage	320/182	320/626	330/252	290/20	0.0608685	0.22323	4314
BRCA	MMP9	pathologic_stage	2700/182	3400/626	7200/252	2100/20	0.00731984	0.0757878	4318
BRCA	PECAM1	pathologic_stage	1200/182	1100/626	1300/252	1100/20	0.00651516	0.0720066	5175
BRCA	SERPINE1	pathologic_stage	1700/182	1600/626	1900/252	1400/20	0.260271	0.477431	5054
BRCA	SPP1	pathologic_stage	5500/182	5800/626	5100/252	5100/20	0.176251	0.387963	6696
BRCA	TIMP2	pathologic_stage	9700/182	9300/626	9700/252	9400/20	0.478951	0.658958	7077
BRCA	TNF	pathologic_stage	56/182	58/626	42/252	49/20	0.00635521	0.0708872	7124
BRCA	TNFRSF11B	pathologic_stage	220/182	150/626	110/252	93/20	0.0011624	0.0313013	4982
CESC	FGF2	clinical_stage	110/162	100/69	63/46	71/22	0.748001	0.936961	2247
CESC	ICAM1	clinical_stage	2500/162	2900/69	2100/46	1700/22	0.221422	0.709371	3383
CESC	ICAM3	clinical_stage	380/162	370/69	400/46	330/22	0.89547	0.973982	3385
CESC	ITGA2	clinical_stage	2100/162	2200/69	2300/46	2000/22	0.459759	0.845579	3673
CESC	LCP1	clinical_stage	2200/162	2200/69	1900/46	1600/22	0.471406	0.848831	3936
CESC	MMP1	clinical_stage	2900/162	1700/69	1500/46	440/22	0.104921	0.582341	4312
CESC	MMP10	clinical_stage	2200/162	1300/69	2500/46	180/22	0.0211855	0.373199	4319
CESC	MMP12	clinical_stage	690/162	990/69	700/46	520/22	0.144101	0.642599	4321
CESC	MMP13	clinical_stage	1300/162	560/69	1500/46	150/22	0.112864	0.599275	4322
CESC	MMP14	clinical_stage	8900/162	8800/69	11000/46	7800/22	0.743959	0.935423	4323
CESC	MMP2	clinical_stage	4000/162	3900/69	4200/46	3300/22	0.433091	0.832074	4313
CESC	MMP3	clinical_stage	810/162	470/69	350/46	200/22	0.129963	0.623432	4314
CESC	MMP9	clinical_stage	1400/162	2600/69	1600/46	980/22	0.169953	0.661911	4318
CESC	PECAM1	clinical_stage	550/162	480/69	600/46	560/22	0.657635	0.911144	5175
CESC	SERPINE1	clinical_stage	2600/162	2400/69	1900/46	1800/22	0.5547	0.877045	5054
CESC	SPP1	clinical_stage	2600/162	3100/69	5500/46	4800/22	0.0054608	0.252526	6696
CESC	TIMP2	clinical_stage	4000/162	3900/69	3500/46	3000/22	0.651737	0.909909	7077
CESC	TNF	clinical_stage	78/162	140/69	72/46	86/22	0.140632	0.636957	7124
CESC	TNFRSF11B	clinical_stage	100/162	85/69	110/46	82/22	0.726552	0.932051	4982
CHOL	FGF2	pathologic_stage	130/19	54/9		160/7	0.429523	0.99976	2247
CHOL	ICAM1	pathologic_stage	4600/19	3300/9		3100/7	0.526612	0.99976	3383
CHOL	ICAM3	pathologic_stage	480/19	390/9		360/7	0.169013	0.99976	3385
CHOL	ITGA2	pathologic_stage	1600/19	1600/9		1900/7	0.926942	0.99976	3673
CHOL	LCP1	pathologic_stage	2700/19	2000/9		3400/7	0.781558	0.99976	3936
CHOL	MMP1	pathologic_stage	150/19	25/9		250/7	0.121294	0.99976	4312
CHOL	MMP10	pathologic_stage	55/19	280/9		70/7	0.45765	0.99976	4319
CHOL	MMP12	pathologic_stage	320/19	45/9		33/7	0.383361	0.99976	4321
CHOL	MMP13	pathologic_stage	63/19	1.1/9		14/7	0.557155	0.99976	4322
CHOL	MMP14	pathologic_stage	9000/19	7900/9		10000/7	0.608288	0.99976	4323
CHOL	MMP2	pathologic_stage	2700/19	1700/9		2900/7	0.626954	0.99976	4313
CHOL	MMP3	pathologic_stage	12/19	1.6/9		6.7/7	0.89672	0.99976	4314
CHOL	MMP9	pathologic_stage	1200/19	510/9		930/7	0.779819	0.99976	4318
CHOL	PECAM1	pathologic_stage	930/19	670/9		660/7	0.62398	0.99976	5175
CHOL	SERPINE1	pathologic_stage	8400/19	4500/9		3100/7	0.662395	0.99976	5054
CHOL	SPP1	pathologic_stage	1e+05/19	110000/9		88000/7	0.838417	0.99976	6696
CHOL	TIMP2	pathologic_stage	10000/19	8900/9		6400/7	0.436953	0.99976	7077
CHOL	TNF	pathologic_stage	45/19	23/9		15/7	0.301824	0.99976	7124
CHOL	TNFRSF11B	pathologic_stage	1200/19	650/9		820/7	0.943793	0.99976	4982
COAD	FGF2	pathologic_stage	77/45	91/111	100/81	120/39	0.63867	0.807249	2247
COAD	ICAM1	pathologic_stage	1100/45	1400/111	1300/81	1100/39	0.577912	0.770543	3383
COAD	ICAM3	pathologic_stage	400/45	430/111	390/81	400/39	0.306076	0.573651	3385
COAD	ITGA2	pathologic_stage	2000/45	2200/111	2000/81	2100/39	0.612392	0.792698	3673
COAD	LCP1	pathologic_stage	1400/45	1600/111	1700/81	1200/39	0.379143	0.634911	3936
COAD	MMP1	pathologic_stage	2400/45	2700/111	2300/81	2200/39	0.844466	0.918594	4312
COAD	MMP10	pathologic_stage	82/45	96/111	77/81	50/39	0.345325	0.60807	4319
COAD	MMP12	pathologic_stage	1300/45	1300/111	1200/81	570/39	0.0430671	0.23252	4321
COAD	MMP13	pathologic_stage	33/45	47/111	47/81	130/39	0.437455	0.678112	4322
COAD	MMP14	pathologic_stage	5700/45	6900/111	8400/81	7700/39	0.0152276	0.145475	4323
COAD	MMP2	pathologic_stage	4900/45	6600/111	7700/81	6400/39	0.31073	0.578419	4313
COAD	MMP3	pathologic_stage	1100/45	980/111	880/81	910/39	0.410564	0.658449	4314
COAD	MMP9	pathologic_stage	1300/45	1300/111	1900/81	1100/39	0.447919	0.685625	4318
COAD	PECAM1	pathologic_stage	470/45	600/111	670/81	580/39	0.187811	0.459677	5175
COAD	SERPINE1	pathologic_stage	610/45	1100/111	1400/81	2300/39	0.000392203	0.024364	5054
COAD	SPP1	pathologic_stage	1900/45	3500/111	4900/81	3400/39	0.11554	0.367143	6696
COAD	TIMP2	pathologic_stage	3600/45	4700/111	6000/81	5600/39	0.0226722	0.174867	7077
COAD	TNF	pathologic_stage	23/45	23/111	19/81	22/39	0.204506	0.478045	7124
COAD	TNFRSF11B	pathologic_stage	350/45	320/111	620/81	510/39	0.583849	0.773896	4982
DLBC	FGF2	clinical_stage	130/8	97/17	76/5	110/12	0.949008	0.997118	2247
DLBC	ICAM1	clinical_stage	4900/8	5500/17	6000/5	4800/12	0.506452	0.994036	3383
DLBC	ICAM3	clinical_stage	4600/8	4500/17	4200/5	3500/12	0.366428	0.994036	3385
DLBC	ITGA2	clinical_stage	29/8	66/17	45/5	82/12	0.195256	0.994036	3673
DLBC	LCP1	clinical_stage	41000/8	39000/17	32000/5	32000/12	0.530971	0.994036	3936
DLBC	MMP1	clinical_stage	5800/8	3700/17	590/5	230/12	0.645923	0.994036	4312
DLBC	MMP10	clinical_stage	15/8	28/17	4.8/5	3.5/12	0.795574	0.994036	4319
DLBC	MMP12	clinical_stage	490/8	1400/17	1400/5	510/12	0.169568	0.994036	4321
DLBC	MMP13	clinical_stage	8.4/8	23/17	2.2/5	13/12	0.261293	0.994036	4322
DLBC	MMP14	clinical_stage	5200/8	6000/17	6800/5	5700/12	0.624917	0.994036	4323
DLBC	MMP2	clinical_stage	5300/8	5100/17	5400/5	3500/12	0.781706	0.994036	4313
DLBC	MMP3	clinical_stage	120/8	410/17	12/5	1.9/12	0.0979304	0.994036	4314
DLBC	MMP9	clinical_stage	26000/8	26000/17	29000/5	26000/12	0.325387	0.994036	4318
DLBC	PECAM1	clinical_stage	1400/8	1500/17	1500/5	1500/12	0.985105	0.999467	5175
DLBC	SERPINE1	clinical_stage	860/8	1000/17	1400/5	1400/12	0.855397	0.994777	5054
DLBC	SPP1	clinical_stage	1900/8	2300/17	1000/5	920/12	0.696935	0.994036	6696
DLBC	TIMP2	clinical_stage	2400/8	2600/17	3100/5	2900/12	0.92105	0.996558	7077
DLBC	TNF	clinical_stage	490/8	250/17	290/5	330/12	0.275942	0.994036	7124
DLBC	TNFRSF11B	clinical_stage	120/8	55/17	93/5	100/12	0.490142	0.994036	4982
ESCA	FGF2	pathologic_stage	87/19	190/78	180/56	110/9	0.0288466	0.230797	2247
ESCA	FGF2	clinical_stage		230/30	170/21	86/11	0.106504	0.661917	2247
ESCA	ICAM1	pathologic_stage	1100/19	2200/78	2600/56	1900/9	0.0512671	0.287398	3383
ESCA	ICAM1	clinical_stage		2100/30	3200/21	1300/11	0.501715	0.869582	3383
ESCA	ICAM3	pathologic_stage	260/19	210/78	230/56	200/9	0.534593	0.741283	3385
ESCA	ICAM3	clinical_stage		120/30	200/21	150/11	0.252145	0.759324	3385
ESCA	ITGA2	pathologic_stage	3100/19	3200/78	3400/56	3500/9	0.947806	0.974593	3673
ESCA	ITGA2	clinical_stage		3800/30	3900/21	2300/11	0.103419	0.658797	3673
ESCA	LCP1	pathologic_stage	1100/19	2400/78	2300/56	1800/9	0.0296789	0.23336	3936
ESCA	LCP1	clinical_stage		2000/30	2000/21	1500/11	0.769858	0.946264	3936
ESCA	MMP1	pathologic_stage	3800/19	5100/78	4000/56	3900/9	0.854036	0.923537	4312
ESCA	MMP1	clinical_stage		6100/30	7500/21	3500/11	0.784238	0.950114	4312
ESCA	MMP10	pathologic_stage	260/19	880/78	450/56	500/9	0.432686	0.678884	4319
ESCA	MMP10	clinical_stage		1200/30	490/21	320/11	0.800891	0.95389	4319
ESCA	MMP12	pathologic_stage	560/19	1300/78	1000/56	740/9	0.0504342	0.285166	4321
ESCA	MMP12	clinical_stage		1600/30	1600/21	890/11	0.474037	0.855491	4321
ESCA	MMP13	pathologic_stage	420/19	1400/78	1200/56	180/9	0.0131591	0.182891	4322
ESCA	MMP13	clinical_stage		1500/30	1300/21	56/11	0.00664475	0.503021	4322
ESCA	MMP14	pathologic_stage	5700/19	8600/78	8200/56	6300/9	0.0473822	0.277321	4323
ESCA	MMP14	clinical_stage		9300/30	9600/21	5500/11	0.0540337	0.611643	4323
ESCA	MMP2	pathologic_stage	5400/19	7600/78	8400/56	5600/9	0.031862	0.239815	4313
ESCA	MMP2	clinical_stage		8500/30	9500/21	4200/11	0.267659	0.767366	4313
ESCA	MMP3	pathologic_stage	710/19	710/78	1100/56	980/9	0.271292	0.561611	4314
ESCA	MMP3	clinical_stage		860/30	3200/21	1100/11	0.174715	0.713098	4314
ESCA	MMP9	pathologic_stage	470/19	1500/78	1400/56	460/9	0.0135395	0.183673	4318
ESCA	MMP9	clinical_stage		1800/30	2200/21	640/11	0.312012	0.785433	4318
ESCA	PECAM1	pathologic_stage	650/19	730/78	840/56	560/9	0.322515	0.6014	5175
ESCA	PECAM1	clinical_stage		510/30	740/21	660/11	0.265122	0.766353	5175
ESCA	SERPINE1	pathologic_stage	3900/19	6900/78	6500/56	12000/9	0.543535	0.74582	5054
ESCA	SERPINE1	clinical_stage		7400/30	9100/21	9000/11	0.498787	0.868788	5054
ESCA	SPP1	pathologic_stage	800/19	6900/78	5700/56	4300/9	0.000186753	0.0425217	6696
ESCA	SPP1	clinical_stage		5800/30	9700/21	1700/11	0.0929726	0.648898	6696
ESCA	TIMP2	pathologic_stage	4400/19	6600/78	7400/56	4800/9	0.0367796	0.253043	7077
ESCA	TIMP2	clinical_stage		7000/30	6900/21	4200/11	0.235544	0.748678	7077
ESCA	TNF	pathologic_stage	33/19	80/78	85/56	36/9	0.772441	0.880569	7124
ESCA	TNF	clinical_stage		74/30	180/21	48/11	0.804758	0.954717	7124
ESCA	TNFRSF11B	pathologic_stage	240/19	160/78	330/56	170/9	0.279148	0.567847	4982
ESCA	TNFRSF11B	clinical_stage		71/30	210/21	280/11	0.146216	0.690629	4982
HNSC	FGF2	pathologic_stage	99/27	110/74	140/81	130/268	0.605579	0.803297	2247
HNSC	FGF2	clinical_stage	100/20	140/98	100/105	150/285	0.440593	0.715715	2247
HNSC	ICAM1	pathologic_stage	2700/27	3400/74	2800/81	3000/268	0.885465	0.94789	3383
HNSC	ICAM1	clinical_stage	2700/20	2900/98	2600/105	3400/285	0.0334239	0.285087	3383
HNSC	ICAM3	pathologic_stage	380/27	380/74	360/81	320/268	0.0715954	0.311127	3385
HNSC	ICAM3	clinical_stage	490/20	320/98	340/105	370/285	0.320454	0.636402	3385
HNSC	ITGA2	pathologic_stage	3100/27	3200/74	3100/81	3100/268	0.186236	0.482498	3673
HNSC	ITGA2	clinical_stage	2500/20	3400/98	2700/105	3300/285	0.0447331	0.314005	3673
HNSC	LCP1	pathologic_stage	4200/27	3400/74	3100/81	2700/268	0.0173749	0.16251	3936
HNSC	LCP1	clinical_stage	3200/20	3500/98	2500/105	3300/285	0.100742	0.415706	3936
HNSC	MMP1	pathologic_stage	24000/27	16000/74	17000/81	14000/268	0.352584	0.638234	4312
HNSC	MMP1	clinical_stage	16000/20	19000/98	15000/105	15000/285	0.0563404	0.335754	4312
HNSC	MMP10	pathologic_stage	13000/27	3900/74	3700/81	4200/268	0.085992	0.337342	4319
HNSC	MMP10	clinical_stage	4000/20	4700/98	4100/105	4700/285	0.0711164	0.364747	4319
HNSC	MMP12	pathologic_stage	1000/27	1800/74	1600/81	1500/268	0.584624	0.791005	4321
HNSC	MMP12	clinical_stage	1400/20	1600/98	1300/105	1600/285	0.49683	0.749866	4321
HNSC	MMP13	pathologic_stage	7600/27	3900/74	4400/81	4100/268	0.742557	0.87669	4322
HNSC	MMP13	clinical_stage	3700/20	7500/98	3900/105	4400/285	0.14994	0.477998	4322
HNSC	MMP14	pathologic_stage	16000/27	14000/74	13000/81	15000/268	0.267649	0.564824	4323
HNSC	MMP14	clinical_stage	13000/20	16000/98	12000/105	15000/285	0.00973371	0.179141	4323
HNSC	MMP2	pathologic_stage	10000/27	8000/74	7600/81	9600/268	0.302212	0.597337	4313
HNSC	MMP2	clinical_stage	9100/20	9600/98	7700/105	9100/285	0.256047	0.582774	4313
HNSC	MMP3	pathologic_stage	4700/27	2800/74	2600/81	2700/268	0.0764532	0.321077	4314
HNSC	MMP3	clinical_stage	3700/20	3100/98	2800/105	2800/285	0.0727588	0.367471	4314
HNSC	MMP9	pathologic_stage	3300/27	5900/74	3800/81	5000/268	0.428184	0.693515	4318
HNSC	MMP9	clinical_stage	3100/20	5000/98	2900/105	5700/285	0.0161824	0.224165	4318
HNSC	PECAM1	pathologic_stage	730/27	720/74	660/81	700/268	0.755123	0.882956	5175
HNSC	PECAM1	clinical_stage	900/20	670/98	650/105	720/285	0.185896	0.517648	5175
HNSC	SERPINE1	pathologic_stage	10000/27	9500/74	9100/81	10000/268	0.788131	0.899425	5054
HNSC	SERPINE1	clinical_stage	7500/20	10000/98	8800/105	10000/285	0.821	0.914751	5054
HNSC	SPP1	pathologic_stage	1600/27	5800/74	7000/81	6100/268	0.00034518	0.0218531	6696
HNSC	SPP1	clinical_stage	3300/20	4900/98	3100/105	6900/285	0.000690497	0.067627	6696
HNSC	TIMP2	pathologic_stage	5100/27	4600/74	4200/81	5800/268	0.115962	0.389869	7077
HNSC	TIMP2	clinical_stage	5600/20	5200/98	4200/105	5600/285	0.0702429	0.363718	7077
HNSC	TNF	pathologic_stage	130/27	100/74	120/81	87/268	0.000157753	0.0138737	7124
HNSC	TNF	clinical_stage	100/20	110/98	92/105	110/285	0.624169	0.818227	7124
HNSC	TNFRSF11B	pathologic_stage	80/27	70/74	76/81	49/268	0.000388705	0.0233897	4982
HNSC	TNFRSF11B	clinical_stage	66/20	67/98	71/105	57/285	0.148836	0.47722	4982
KICH	FGF2	pathologic_stage	270/21	280/25	280/14	170/6	0.353441	0.659983	2247
KICH	ICAM1	pathologic_stage	540/21	510/25	440/14	940/6	0.348322	0.656385	3383
KICH	ICAM3	pathologic_stage	360/21	440/25	430/14	400/6	0.522357	0.759706	3385
KICH	ITGA2	pathologic_stage	1100/21	740/25	820/14	530/6	0.460162	0.724549	3673
KICH	LCP1	pathologic_stage	710/21	400/25	590/14	950/6	0.0203928	0.273619	3936
KICH	MMP1	pathologic_stage	33/21	21/25	29/14	9100/6	0.260191	0.594092	4312
KICH	MMP10	pathologic_stage	8.3/21	0.78/25	8/14	7.4/6	0.167866	0.519445	4319
KICH	MMP12	pathologic_stage	28/21	7.4/25	13/14	15/6	0.382373	0.6772	4321
KICH	MMP13	pathologic_stage	4.4/21	2.8/25	2.6/14	340/6	0.452499	0.720255	4322
KICH	MMP14	pathologic_stage	1600/21	1400/25	1500/14	26000/6	0.750749	0.876512	4323
KICH	MMP2	pathologic_stage	1400/21	920/25	910/14	26000/6	0.272192	0.602408	4313
KICH	MMP3	pathologic_stage	0.34/21	1.9/25	0.49/14	44/6	0.727622	0.866614	4314
KICH	MMP9	pathologic_stage	110/21	110/25	190/14	870/6	0.725615	0.865215	4318
KICH	PECAM1	pathologic_stage	1100/21	1100/25	1200/14	930/6	0.769266	0.885174	5175
KICH	SERPINE1	pathologic_stage	780/21	540/25	580/14	20000/6	0.292893	0.61668	5054
KICH	SPP1	pathologic_stage	73000/21	27000/25	25000/14	40000/6	0.263035	0.595841	6696
KICH	TIMP2	pathologic_stage	3500/21	2500/25	3300/14	9600/6	0.147252	0.498113	7077
KICH	TNF	pathologic_stage	10/21	6.4/25	8.8/14	4.3/6	0.350116	0.657701	7124
KICH	TNFRSF11B	pathologic_stage	710/21	960/25	450/14	1200/6	0.899434	0.948426	4982
KIRC	FGF2	pathologic_stage	540/268	510/57	560/123	610/84	0.34164	0.462722	2247
KIRC	ICAM1	pathologic_stage	3300/268	3300/57	4000/123	4600/84	5.78429e-06	7.8167e-05	3383
KIRC	ICAM3	pathologic_stage	450/268	590/57	560/123	590/84	2.3951e-05	0.000242958	3385
KIRC	ITGA2	pathologic_stage	1100/268	910/57	880/123	990/84	0.000645627	0.00342381	3673
KIRC	LCP1	pathologic_stage	3300/268	3900/57	4100/123	4400/84	0.00968616	0.0301253	3936
KIRC	MMP1	pathologic_stage	150/268	220/57	700/123	220/84	0.080477	0.157134	4312
KIRC	MMP10	pathologic_stage	2.8/268	1.8/57	3.7/123	4/84	0.138462	0.237043	4319
KIRC	MMP12	pathologic_stage	43/268	16/57	70/123	44/84	0.000811292	0.00410851	4321
KIRC	MMP13	pathologic_stage	8.5/267	7.6/57	27/123	120/84	0.00176114	0.00769431	4322
KIRC	MMP14	pathologic_stage	5600/268	5100/57	6500/123	7500/84	0.000690591	0.0036108	4323
KIRC	MMP2	pathologic_stage	1900/268	1800/57	2100/123	2800/84	0.301125	0.42217	4313
KIRC	MMP3	pathologic_stage	1.5/267	5.8/57	13/123	7.8/84	7.2649e-05	0.000588406	4314
KIRC	MMP9	pathologic_stage	600/268	540/57	1100/123	1500/84	1.27807e-06	2.3488e-05	4318
KIRC	PECAM1	pathologic_stage	5200/268	4700/57	4800/123	4500/84	0.0616742	0.127749	5175
KIRC	SERPINE1	pathologic_stage	7000/268	9300/57	9000/123	16000/84	0.0310521	0.0752557	5054
KIRC	SPP1	pathologic_stage	37000/268	38000/57	34000/123	36000/84	0.419279	0.536377	6696
KIRC	TIMP2	pathologic_stage	6900/268	6100/57	6800/123	6700/84	0.217681	0.332991	7077
KIRC	TNF	pathologic_stage	22/268	14/57	22/123	18/84	0.141714	0.241337	7124
KIRC	TNFRSF11B	pathologic_stage	830/268	820/57	800/123	880/84	0.183337	0.292887	4982
KIRP	FGF2	pathologic_stage	580/172	480/22	550/52	550/15	0.565131	0.723786	2247
KIRP	FGF2	clinical_stage	540/140	640/21	440/29	630/11	0.346509	0.559248	2247
KIRP	ICAM1	pathologic_stage	1800/172	2100/22	1800/52	2400/15	0.870739	0.924237	3383
KIRP	ICAM1	clinical_stage	1800/140	2200/21	1900/29	2000/11	0.565412	0.727451	3383
KIRP	ICAM3	pathologic_stage	340/172	400/22	390/52	330/15	0.421314	0.614554	3385
KIRP	ICAM3	clinical_stage	350/140	380/21	390/29	330/11	0.925331	0.95603	3385
KIRP	ITGA2	pathologic_stage	620/172	730/22	590/52	810/15	0.658329	0.789267	3673
KIRP	ITGA2	clinical_stage	620/140	760/21	640/29	830/11	0.130205	0.334383	3673
KIRP	LCP1	pathologic_stage	1500/172	2100/22	1600/52	1200/15	0.725727	0.83183	3936
KIRP	LCP1	clinical_stage	1400/140	2300/21	1600/29	1000/11	0.299002	0.518052	3936
KIRP	MMP1	pathologic_stage	110/172	42/22	290/52	60/15	5.96559e-06	0.00040536	4312
KIRP	MMP1	clinical_stage	130/140	40/21	72/29	68/11	0.000464201	0.0144155	4312
KIRP	MMP10	pathologic_stage	38/172	24/22	4.1/52	6.9/15	0.487761	0.668271	4319
KIRP	MMP10	clinical_stage	46/140	0.23/21	1.5/29	9.4/11	0.153521	0.365033	4319
KIRP	MMP12	pathologic_stage	13/172	85/22	14/52	12/15	0.456986	0.645186	4321
KIRP	MMP12	clinical_stage	9.3/140	23/21	23/29	13/11	0.299494	0.518572	4321
KIRP	MMP13	pathologic_stage	1.8/172	1.5/21	96/52	0.31/15	0.138206	0.313231	4322
KIRP	MMP13	clinical_stage	1.2/140	0.7/21	2.6/29	0.2/11	0.106844	0.30091	4322
KIRP	MMP14	pathologic_stage	7000/172	8100/22	9900/52	6600/15	0.0272825	0.111581	4323
KIRP	MMP14	clinical_stage	7100/140	8300/21	10000/29	5300/11	0.0880508	0.272024	4323
KIRP	MMP2	pathologic_stage	1200/172	770/22	720/52	1000/15	0.762993	0.855337	4313
KIRP	MMP2	clinical_stage	1100/140	880/21	970/29	750/11	0.854714	0.914793	4313
KIRP	MMP3	pathologic_stage	4.3/172	3.6/21	1.9/52	8.2/15	0.622036	0.764986	4314
KIRP	MMP3	clinical_stage	2/140	3.5/21	2.4/29	10/11	0.548623	0.715851	4314
KIRP	MMP9	pathologic_stage	580/172	1200/22	330/52	220/15	0.285963	0.487679	4318
KIRP	MMP9	clinical_stage	470/140	350/21	500/29	130/11	0.343387	0.556578	4318
KIRP	PECAM1	pathologic_stage	650/172	990/22	760/52	900/15	0.117959	0.28382	5175
KIRP	PECAM1	clinical_stage	640/140	1100/21	860/29	830/11	0.0877529	0.271546	5175
KIRP	SERPINE1	pathologic_stage	660/172	1300/22	880/52	1500/15	0.141245	0.317332	5054
KIRP	SERPINE1	clinical_stage	660/140	780/21	1300/29	1100/11	0.133381	0.338817	5054
KIRP	SPP1	pathologic_stage	130000/172	170000/22	140000/52	150000/15	0.74322	0.843373	6696
KIRP	SPP1	clinical_stage	130000/140	180000/21	170000/29	180000/11	0.0153983	0.103348	6696
KIRP	TIMP2	pathologic_stage	9100/172	11000/22	9800/52	13000/15	0.793996	0.875542	7077
KIRP	TIMP2	clinical_stage	8700/140	10000/21	10000/29	12000/11	0.551427	0.71731	7077
KIRP	TNF	pathologic_stage	38/172	30/22	21/52	9.4/15	0.00013816	0.00343868	7124
KIRP	TNF	clinical_stage	37/140	42/21	11/29	17/11	0.00167102	0.0299701	7124
KIRP	TNFRSF11B	pathologic_stage	2500/172	2600/22	2200/52	3000/15	0.726136	0.832198	4982
KIRP	TNFRSF11B	clinical_stage	2200/140	2500/21	2600/29	3800/11	0.38746	0.594348	4982
LIHC	FGF2	pathologic_stage	180/173	170/87	220/85	58/5	0.852968	0.928584	2247
LIHC	ICAM1	pathologic_stage	2800/173	3600/87	2900/85	2800/5	0.504672	0.749391	3383
LIHC	ICAM3	pathologic_stage	930/173	830/87	760/85	1500/5	0.037137	0.2584	3385
LIHC	ITGA2	pathologic_stage	180/173	290/87	350/85	250/5	0.0230459	0.212854	3673
LIHC	LCP1	pathologic_stage	2100/173	2400/87	2000/85	1200/5	0.310284	0.623992	3936
LIHC	MMP1	pathologic_stage	42/173	53/87	250/85	35/5	0.00554171	0.120201	4312
LIHC	MMP10	pathologic_stage	12/173	70/87	69/85	11/5	0.00167647	0.0828826	4319
LIHC	MMP12	pathologic_stage	62/173	55/87	170/85	20/5	0.0423229	0.272046	4321
LIHC	MMP13	pathologic_stage	1.2/171	15/86	4.9/85	1.4/5	0.125559	0.429625	4322
LIHC	MMP14	pathologic_stage	1900/173	3400/87	3600/85	2600/5	0.105074	0.399824	4323
LIHC	MMP2	pathologic_stage	970/173	1400/87	1500/85	2300/5	0.559139	0.782737	4313
LIHC	MMP3	pathologic_stage	17/173	7.5/86	5.2/85	4.7/5	0.504486	0.749318	4314
LIHC	MMP9	pathologic_stage	590/173	730/87	880/85	410/5	0.378802	0.670553	4318
LIHC	PECAM1	pathologic_stage	1200/173	1100/87	1000/85	2200/5	0.0254269	0.221244	5175
LIHC	SERPINE1	pathologic_stage	3300/173	3700/87	6200/85	4900/5	0.0645024	0.326771	5054
LIHC	SPP1	pathologic_stage	18000/173	25000/87	21000/85	16000/5	0.0634987	0.324993	6696
LIHC	TIMP2	pathologic_stage	2500/173	3900/87	3900/85	5600/5	0.104947	0.39978	7077
LIHC	TNF	pathologic_stage	12/173	10/87	7/85	2/5	0.0227033	0.212059	7124
LIHC	TNFRSF11B	pathologic_stage	210/173	260/87	280/85	70/5	0.68447	0.845617	4982
LUAD	FGF2	pathologic_stage	97/277	87/122	120/84	130/26	0.307635	0.610358	2247
LUAD	ICAM1	pathologic_stage	11000/277	11000/122	9600/84	8300/26	0.260683	0.565676	3383
LUAD	ICAM3	pathologic_stage	640/277	620/122	530/84	450/26	0.00128598	0.0533362	3385
LUAD	ITGA2	pathologic_stage	2200/277	2200/122	2700/84	2100/26	0.275646	0.579603	3673
LUAD	LCP1	pathologic_stage	4900/277	4800/122	4300/84	3500/26	0.207557	0.51021	3936
LUAD	MMP1	pathologic_stage	1900/277	3500/122	2200/84	5800/26	0.0182179	0.162231	4312
LUAD	MMP10	pathologic_stage	230/277	140/122	190/84	74/26	0.0608648	0.291562	4319
LUAD	MMP12	pathologic_stage	730/277	700/122	760/84	900/26	0.387271	0.677065	4321
LUAD	MMP13	pathologic_stage	680/277	860/122	550/84	1200/26	0.209893	0.513732	4322
LUAD	MMP14	pathologic_stage	6700/277	8400/122	8600/84	5400/26	0.00349654	0.0801984	4323
LUAD	MMP2	pathologic_stage	7700/277	8800/122	8200/84	4800/26	0.05379	0.274235	4313
LUAD	MMP3	pathologic_stage	46/277	48/122	59/84	26/26	0.279973	0.584346	4314
LUAD	MMP9	pathologic_stage	2000/277	2600/122	2000/84	1500/26	0.227134	0.532646	4318
LUAD	PECAM1	pathologic_stage	1400/277	1300/122	1300/84	1200/26	0.355479	0.65106	5175
LUAD	SERPINE1	pathologic_stage	2200/277	3000/122	3400/84	2100/26	0.0733252	0.315823	5054
LUAD	SPP1	pathologic_stage	14000/277	14000/122	12000/84	15000/26	0.591361	0.80464	6696
LUAD	TIMP2	pathologic_stage	7000/277	8300/122	7800/84	6700/26	0.604198	0.810819	7077
LUAD	TNF	pathologic_stage	51/277	36/122	36/84	47/26	0.0350107	0.225154	7124
LUAD	TNFRSF11B	pathologic_stage	140/277	140/122	120/84	260/26	0.804685	0.915411	4982
LUSC	FGF2	pathologic_stage	160/245	160/162	140/84	140/7	0.586232	0.801926	2247
LUSC	ICAM1	pathologic_stage	4200/245	4300/162	3400/84	3900/7	0.32228	0.643374	3383
LUSC	ICAM3	pathologic_stage	470/245	410/162	430/84	360/7	0.699309	0.859019	3385
LUSC	ITGA2	pathologic_stage	2800/245	3100/162	2800/84	3600/7	0.265638	0.607653	3673
LUSC	LCP1	pathologic_stage	3900/245	4300/162	3600/84	3000/7	0.747319	0.881456	3936
LUSC	MMP1	pathologic_stage	6400/245	4500/162	5400/84	9500/7	0.465296	0.735936	4312
LUSC	MMP10	pathologic_stage	3300/245	2700/162	2400/84	5600/7	0.0955142	0.422134	4319
LUSC	MMP12	pathologic_stage	2000/245	2000/162	1800/84	1800/7	0.480845	0.74399	4321
LUSC	MMP13	pathologic_stage	2100/245	2500/162	1400/84	1800/7	0.382497	0.68181	4322
LUSC	MMP14	pathologic_stage	10000/245	12000/162	10000/84	15000/7	0.180754	0.533872	4323
LUSC	MMP2	pathologic_stage	9300/245	10000/162	8400/84	14000/7	0.036995	0.298206	4313
LUSC	MMP3	pathologic_stage	340/245	380/162	400/84	400/7	0.389882	0.686214	4314
LUSC	MMP9	pathologic_stage	3100/245	3500/162	3100/84	1600/7	0.793446	0.903702	4318
LUSC	PECAM1	pathologic_stage	950/245	810/162	820/84	790/7	0.236166	0.581117	5175
LUSC	SERPINE1	pathologic_stage	4800/245	5400/162	5200/84	10000/7	0.178553	0.531866	5054
LUSC	SPP1	pathologic_stage	22000/245	18000/162	28000/84	20000/7	0.165131	0.517391	6696
LUSC	TIMP2	pathologic_stage	5400/245	5800/162	5300/84	7300/7	0.460928	0.732938	7077
LUSC	TNF	pathologic_stage	67/245	57/162	29/84	29/7	0.0280543	0.269167	7124
LUSC	TNFRSF11B	pathologic_stage	130/245	110/162	130/84	94/7	0.338382	0.653365	4982
MESO	FGF2	pathologic_stage	940/10	730/16	490/45	620/16	0.919069	0.97416	2247
MESO	ICAM1	pathologic_stage	9200/10	5400/16	8200/45	5700/16	0.5711	0.85525	3383
MESO	ICAM3	pathologic_stage	370/10	520/16	450/45	440/16	0.677012	0.896224	3385
MESO	ITGA2	pathologic_stage	1100/10	240/16	350/45	450/16	0.227069	0.688711	3673
MESO	LCP1	pathologic_stage	2000/10	2600/16	2700/45	2800/16	0.816047	0.944812	3936
MESO	MMP1	pathologic_stage	130/10	150/16	550/45	53/16	0.362138	0.76243	4312
MESO	MMP10	pathologic_stage	13/10	1.5/16	18/45	3.7/16	0.0620955	0.513377	4319
MESO	MMP12	pathologic_stage	37/10	150/16	100/45	63/16	0.710292	0.907232	4321
MESO	MMP13	pathologic_stage	25/10	18/16	190/45	62/16	0.575544	0.857344	4322
MESO	MMP14	pathologic_stage	21000/10	14000/16	16000/45	26000/16	0.0357343	0.458209	4323
MESO	MMP2	pathologic_stage	9900/10	7100/16	14000/45	17000/16	0.0960233	0.568068	4313
MESO	MMP3	pathologic_stage	730/10	44/16	230/45	480/16	0.495021	0.820043	4314
MESO	MMP9	pathologic_stage	1200/10	3400/16	3000/45	3000/16	0.702275	0.904927	4318
MESO	PECAM1	pathologic_stage	1100/10	900/16	1100/45	1400/16	0.586665	0.862182	5175
MESO	SERPINE1	pathologic_stage	18000/10	7500/16	9900/45	11000/16	0.335782	0.750866	5054
MESO	SPP1	pathologic_stage	11000/10	15000/16	12000/45	18000/16	0.146974	0.624077	6696
MESO	TIMP2	pathologic_stage	24000/10	24000/16	21000/45	26000/16	0.221285	0.68615	7077
MESO	TNF	pathologic_stage	39/10	30/16	34/45	34/16	0.842613	0.951894	7124
MESO	TNFRSF11B	pathologic_stage	530/10	550/16	390/45	350/16	0.916367	0.973169	4982
OV	FGF2	clinical_stage		49/22	59/246	54/38	0.643708	0.845192	2247
OV	ICAM1	clinical_stage		2800/22	2900/246	3100/38	0.71174	0.877577	3383
OV	ICAM3	clinical_stage		330/22	420/246	400/38	0.181194	0.528949	3385
OV	ITGA2	clinical_stage		190/22	180/246	170/38	0.930838	0.970006	3673
OV	LCP1	clinical_stage		2100/22	2100/246	2000/38	0.953229	0.977786	3936
OV	MMP1	clinical_stage		97/22	210/246	89/38	0.147657	0.489919	4312
OV	MMP10	clinical_stage		63/22	280/245	100/38	0.502309	0.775823	4319
OV	MMP12	clinical_stage		160/22	110/246	38/38	0.0228369	0.252316	4321
OV	MMP13	clinical_stage		34/22	180/246	82/38	0.0387407	0.305715	4322
OV	MMP14	clinical_stage		4300/22	5500/246	4600/38	0.366086	0.691708	4323
OV	MMP2	clinical_stage		3200/22	6600/246	6300/38	0.042416	0.315634	4313
OV	MMP3	clinical_stage		11/22	17/246	5/38	0.761616	0.900865	4314
OV	MMP9	clinical_stage		1500/22	1400/246	750/38	0.105885	0.431302	4318
OV	PECAM1	clinical_stage		350/22	370/246	390/38	0.662518	0.855194	5175
OV	SERPINE1	clinical_stage		840/22	2000/246	1500/38	0.211306	0.561546	5054
OV	SPP1	clinical_stage		9500/22	12000/246	10000/38	0.413417	0.723535	6696
OV	TIMP2	clinical_stage		6100/22	8100/246	8700/38	0.172831	0.519966	7077
OV	TNF	clinical_stage		230/22	190/246	200/38	0.647326	0.846738	7124
OV	TNFRSF11B	clinical_stage		540/22	360/246	290/38	0.663064	0.855505	4982
PAAD	FGF2	pathologic_stage	350/21	330/147		270/5	0.924046	0.956104	2247
PAAD	ICAM1	pathologic_stage	1600/21	2500/147		1900/5	0.0695325	0.307239	3383
PAAD	ICAM3	pathologic_stage	440/21	540/147		310/5	0.0671131	0.304473	3385
PAAD	ITGA2	pathologic_stage	2000/21	3100/147		4100/5	0.0671008	0.304473	3673
PAAD	LCP1	pathologic_stage	2700/21	3100/147		1900/5	0.480777	0.668327	3936
PAAD	MMP1	pathologic_stage	3500/21	8500/147		4700/5	0.0731169	0.3089	4312
PAAD	MMP10	pathologic_stage	150/21	180/147		66/5	0.0905904	0.327303	4319
PAAD	MMP12	pathologic_stage	260/21	340/147		220/5	0.159044	0.392996	4321
PAAD	MMP13	pathologic_stage	40/21	170/147		78/5	0.0414918	0.2826	4322
PAAD	MMP14	pathologic_stage	13000/21	18000/147		14000/5	0.0979361	0.333888	4323
PAAD	MMP2	pathologic_stage	15000/21	17000/147		19000/5	0.315131	0.536741	4313
PAAD	MMP3	pathologic_stage	56/21	210/147		60/5	0.0325707	0.276315	4314
PAAD	MMP9	pathologic_stage	1400/21	1600/147		650/5	0.172332	0.404934	4318
PAAD	PECAM1	pathologic_stage	1600/21	1600/147		1100/5	0.322569	0.543507	5175
PAAD	SERPINE1	pathologic_stage	5900/21	8300/147		13000/5	0.34323	0.559678	5054
PAAD	SPP1	pathologic_stage	11000/21	19000/147		11000/5	0.097557	0.333562	6696
PAAD	TIMP2	pathologic_stage	15000/21	15000/147		18000/5	0.592432	0.745602	7077
PAAD	TNF	pathologic_stage	23/21	31/147		22/5	0.28664	0.51125	7124
PAAD	TNFRSF11B	pathologic_stage	290/21	600/147		450/5	0.104067	0.339864	4982
READ	FGF2	pathologic_stage	88/12	120/26	85/33	91/13	0.829553	0.945451	2247
READ	ICAM1	pathologic_stage	900/12	1200/26	1100/33	1200/13	0.435283	0.826645	3383
READ	ICAM3	pathologic_stage	410/12	390/26	380/33	360/13	0.715008	0.909798	3385
READ	ITGA2	pathologic_stage	2100/12	2000/26	1800/33	1600/13	0.310009	0.774256	3673
READ	LCP1	pathologic_stage	1800/12	1400/26	1500/33	1800/13	0.534703	0.856643	3936
READ	MMP1	pathologic_stage	2100/12	1700/26	1700/33	3100/13	0.595553	0.873048	4312
READ	MMP10	pathologic_stage	150/12	87/26	130/33	100/13	0.116843	0.643682	4319
READ	MMP12	pathologic_stage	1200/12	1100/26	1400/33	870/13	0.485656	0.84149	4321
READ	MMP13	pathologic_stage	18/12	34/26	37/33	300/13	0.726131	0.913172	4322
READ	MMP14	pathologic_stage	4500/12	6000/26	6600/33	9900/13	0.199022	0.722034	4323
READ	MMP2	pathologic_stage	5000/12	5700/26	5200/33	10000/13	0.436611	0.827736	4313
READ	MMP3	pathologic_stage	2000/12	1100/26	1200/33	1500/13	0.588782	0.870705	4314
READ	MMP9	pathologic_stage	650/12	1300/26	1600/33	2300/13	0.0702957	0.569113	4318
READ	PECAM1	pathologic_stage	500/12	530/26	650/33	710/13	0.464643	0.836097	5175
READ	SERPINE1	pathologic_stage	550/12	1300/26	1100/33	1400/13	0.184343	0.713228	5054
READ	SPP1	pathologic_stage	620/12	3800/26	4100/33	5100/13	0.0418398	0.50189	6696
READ	TIMP2	pathologic_stage	3700/12	4900/26	4800/33	8500/13	0.12226	0.650382	7077
READ	TNF	pathologic_stage	23/12	18/26	22/33	32/13	0.158433	0.685894	7124
READ	TNFRSF11B	pathologic_stage	290/12	650/26	250/33	410/13	0.100963	0.624517	4982
SKCM	FGF2	pathologic_stage	240/78	220/140	310/171	290/24	0.378558	0.601708	2247
SKCM	ICAM1	pathologic_stage	5700/78	5200/140	6000/171	5200/24	0.473918	0.672258	3383
SKCM	ICAM3	pathologic_stage	670/78	470/140	700/171	540/24	0.00785698	0.0734486	3385
SKCM	ITGA2	pathologic_stage	650/78	410/140	440/171	420/24	0.0485556	0.208181	3673
SKCM	LCP1	pathologic_stage	4600/78	2000/140	4300/171	2700/24	3.06188e-06	0.000729522	3936
SKCM	MMP1	pathologic_stage	2100/78	920/140	810/171	480/24	0.0056254	0.0603731	4312
SKCM	MMP10	pathologic_stage	40/78	67/140	19/171	8.1/24	0.0443777	0.199418	4319
SKCM	MMP12	pathologic_stage	170/78	40/140	110/171	49/23	0.00036849	0.0109168	4321
SKCM	MMP13	pathologic_stage	97/77	210/140	160/171	280/24	0.154779	0.380374	4322
SKCM	MMP14	pathologic_stage	20000/78	22000/140	20000/171	23000/24	0.0483795	0.207846	4323
SKCM	MMP2	pathologic_stage	5600/78	7900/140	8300/171	12000/24	0.416829	0.632202	4313
SKCM	MMP3	pathologic_stage	36/78	210/140	65/171	44/24	1.8982e-05	0.00199506	4314
SKCM	MMP9	pathologic_stage	2800/78	1700/140	5000/171	3900/24	0.000428217	0.011963	4318
SKCM	PECAM1	pathologic_stage	800/78	610/140	780/171	830/24	0.0141084	0.104692	5175
SKCM	SERPINE1	pathologic_stage	4700/78	1200/140	2300/171	1600/24	0.14088	0.362913	5054
SKCM	SPP1	pathologic_stage	13000/78	12000/140	16000/171	26000/24	0.00629856	0.0647575	6696
SKCM	TIMP2	pathologic_stage	26000/78	29000/140	27000/171	27000/24	0.0780273	0.267153	7077
SKCM	TNF	pathologic_stage	23/78	23/140	28/171	19/24	0.829769	0.904324	7124
SKCM	TNFRSF11B	pathologic_stage	62/78	56/140	97/171	50/24	0.0378482	0.18343	4982
STAD	FGF2	pathologic_stage	180/57	210/123	230/171	190/41	0.00811946	0.113384	2247
STAD	ICAM1	pathologic_stage	2100/57	2700/123	2400/171	2300/41	0.192702	0.470196	3383
STAD	ICAM3	pathologic_stage	360/57	480/123	440/171	590/41	0.0118792	0.134243	3385
STAD	ITGA2	pathologic_stage	2400/57	2000/123	2100/171	2900/41	0.223809	0.504444	3673
STAD	LCP1	pathologic_stage	2600/57	2800/123	3600/171	3500/41	0.126221	0.389817	3936
STAD	MMP1	pathologic_stage	3800/57	3900/123	3800/171	3100/41	0.329941	0.597125	4312
STAD	MMP10	pathologic_stage	110/57	85/123	110/171	150/41	0.00242131	0.0682715	4319
STAD	MMP12	pathologic_stage	1300/57	1100/123	1100/171	1600/41	0.590937	0.776585	4321
STAD	MMP13	pathologic_stage	93/57	49/123	32/171	50/41	0.0500404	0.25435	4322
STAD	MMP14	pathologic_stage	6100/57	7300/123	6400/171	6700/41	0.0738276	0.303868	4323
STAD	MMP2	pathologic_stage	7900/57	8800/123	8100/171	8700/41	0.019144	0.164252	4313
STAD	MMP3	pathologic_stage	1300/57	600/123	1000/171	890/41	0.0113775	0.131114	4314
STAD	MMP9	pathologic_stage	1500/57	1200/123	990/171	1100/41	0.151843	0.421772	4318
STAD	PECAM1	pathologic_stage	830/57	1100/123	1100/171	1100/41	0.0142601	0.144338	5175
STAD	SERPINE1	pathologic_stage	2800/57	2800/123	3100/171	2500/41	0.359171	0.620641	5054
STAD	SPP1	pathologic_stage	3800/57	3300/123	3500/171	6400/41	0.0430651	0.236403	6696
STAD	TIMP2	pathologic_stage	6400/57	8400/123	8100/171	9300/41	0.00304052	0.0760522	7077
STAD	TNF	pathologic_stage	35/57	49/123	29/171	29/41	0.0579827	0.271292	7124
STAD	TNFRSF11B	pathologic_stage	530/57	260/123	350/171	400/41	0.158986	0.431162	4982
TGCT	FGF2	pathologic_stage	280/56	550/12	670/14		0.0136889	0.0747002	2247
TGCT	FGF2	clinical_stage	330/52	480/17	630/15		0.0760905	0.285364	2247
TGCT	FGF2	igcccg_stage	490/32 (stage good)	490/9 (stage intermediate)			0.768745	0.966164	2247
TGCT	ICAM1	pathologic_stage	1400/56	1400/12	870/14		0.0707029	0.19071	3383
TGCT	ICAM1	clinical_stage	1300/52	1600/17	870/15		0.0345764	0.214222	3383
TGCT	ICAM1	igcccg_stage	1300/32 (stage good)	1200/9 (stage intermediate)			0.26867	0.8874	3383
TGCT	ICAM3	pathologic_stage	640/56	550/12	430/14		0.254231	0.417564	3385
TGCT	ICAM3	clinical_stage	620/52	530/17	430/15		0.314628	0.551039	3385
TGCT	ICAM3	igcccg_stage	510/32 (stage good)	560/9 (stage intermediate)			0.631142	0.939367	3385
TGCT	ITGA2	pathologic_stage	140/56	220/12	280/14		0.00198295	0.0315259	3673
TGCT	ITGA2	clinical_stage	150/52	250/17	270/15		0.00164264	0.097515	3673
TGCT	ITGA2	igcccg_stage	240/32 (stage good)	230/9 (stage intermediate)			0.282586	0.8874	3673
TGCT	LCP1	pathologic_stage	9000/56	8400/12	7400/14		0.496506	0.639469	3936
TGCT	LCP1	clinical_stage	9100/52	8600/17	7700/15		0.695769	0.828062	3936
TGCT	LCP1	igcccg_stage	8400/32 (stage good)	7400/9 (stage intermediate)			0.653383	0.939367	3936
TGCT	MMP1	pathologic_stage	37/56	67/12	170/14		0.0119339	0.0697003	4312
TGCT	MMP1	clinical_stage	42/52	51/17	160/15		0.0799469	0.29092	4312
TGCT	MMP1	igcccg_stage	86/32 (stage good)	58/9 (stage intermediate)			0.864882	0.981402	4312
TGCT	MMP10	pathologic_stage	6.2/56	4.8/12	6.1/14		0.13033	0.274771	4319
TGCT	MMP10	clinical_stage	7/52	3.5/17	5.7/15		0.425184	0.641226	4319
TGCT	MMP10	igcccg_stage	3.9/32 (stage good)	18/9 (stage intermediate)			0.814612	0.975095	4319
TGCT	MMP12	pathologic_stage	1600/56	620/12	530/14		0.786055	0.858645	4321
TGCT	MMP12	clinical_stage	1500/52	1200/17	510/15		0.751716	0.862288	4321
TGCT	MMP12	igcccg_stage	870/32 (stage good)	650/9 (stage intermediate)			0.675924	0.941791	4321
TGCT	MMP13	pathologic_stage	7.2/55	2.9/12	30/14		0.097154	0.22967	4322
TGCT	MMP13	clinical_stage	14/51	2.7/17	28/15		0.593505	0.763055	4322
TGCT	MMP13	igcccg_stage	15/32 (stage good)	32/9 (stage intermediate)			0.267497	0.8874	4322
TGCT	MMP14	pathologic_stage	3900/56	7100/12	5900/14		0.00110604	0.0247049	4323
TGCT	MMP14	clinical_stage	4500/52	6900/17	5600/15		0.00284233	0.107924	4323
TGCT	MMP14	igcccg_stage	5500/32 (stage good)	8200/9 (stage intermediate)			0.194755	0.876249	4323
TGCT	MMP2	pathologic_stage	8900/56	6000/12	6100/14		0.231758	0.393587	4313
TGCT	MMP2	clinical_stage	8900/52	7700/17	6100/15		0.404827	0.625934	4313
TGCT	MMP2	igcccg_stage	8500/32 (stage good)	6300/9 (stage intermediate)			0.525006	0.910955	4313
TGCT	MMP3	pathologic_stage	0.64/56	0.4/12	1.6/14		0.30435	0.468458	4314
TGCT	MMP3	clinical_stage	4.2/52	8/17	1.5/15		0.705749	0.834859	4314
TGCT	MMP3	igcccg_stage	5/32 (stage good)	0.077/9 (stage intermediate)			0.11339	0.876249	4314
TGCT	MMP9	pathologic_stage	8200/56	7300/12	4600/14		0.495942	0.638954	4318
TGCT	MMP9	clinical_stage	7800/52	8300/17	4800/15		0.702592	0.83289	4318
TGCT	MMP9	igcccg_stage	6900/32 (stage good)	7400/9 (stage intermediate)			0.889279	0.98446	4318
TGCT	PECAM1	pathologic_stage	800/56	1200/12	950/14		0.0315955	0.120209	5175
TGCT	PECAM1	clinical_stage	840/52	1000/17	920/15		0.124836	0.353334	5175
TGCT	PECAM1	igcccg_stage	930/32 (stage good)	1200/9 (stage intermediate)			0.194755	0.876249	5175
TGCT	SERPINE1	pathologic_stage	500/56	2200/12	820/14		0.000227106	0.0159374	5054
TGCT	SERPINE1	clinical_stage	510/52	1800/17	780/15		0.001798	0.0982383	5054
TGCT	SERPINE1	igcccg_stage	1300/32 (stage good)	810/9 (stage intermediate)			0.485174	0.901517	5054
TGCT	SPP1	pathologic_stage	1500/56	3200/12	3300/14		7.4594e-05	0.0132028	6696
TGCT	SPP1	clinical_stage	1600/52	2800/17	3100/15		0.000377492	0.06894	6696
TGCT	SPP1	igcccg_stage	2400/32 (stage good)	3700/9 (stage intermediate)			0.675924	0.941791	6696
TGCT	TIMP2	pathologic_stage	3600/56	5000/12	3800/14		0.0619283	0.176882	7077
TGCT	TIMP2	clinical_stage	3600/52	5900/17	3700/15		0.0204963	0.183232	7077
TGCT	TIMP2	igcccg_stage	4800/32 (stage good)	5000/9 (stage intermediate)			0.37578	0.889383	7077
TGCT	TNF	pathologic_stage	76/56	64/12	52/14		0.283692	0.448305	7124
TGCT	TNF	clinical_stage	71/52	78/17	51/15		0.305862	0.542927	7124
TGCT	TNF	igcccg_stage	60/32 (stage good)	74/9 (stage intermediate)			0.81648	0.975095	7124
TGCT	TNFRSF11B	pathologic_stage	27/56	120/12	58/14		0.533369	0.668503	4982
TGCT	TNFRSF11B	clinical_stage	26/52	92/17	55/15		0.304765	0.541826	4982
TGCT	TNFRSF11B	igcccg_stage	75/32 (stage good)	27/9 (stage intermediate)			0.609219	0.935873	4982
THCA	FGF2	pathologic_stage	280/288	220/51	290/111	250/57	0.026523	0.07537	2247
THCA	ICAM1	pathologic_stage	3500/288	2100/51	3800/111	4400/57	2.65086e-09	9.31566e-07	3383
THCA	ICAM3	pathologic_stage	410/288	300/51	390/111	350/57	0.0387535	0.100355	3385
THCA	ITGA2	pathologic_stage	1700/288	1000/51	1800/111	1800/57	0.000380386	0.00311817	3673
THCA	LCP1	pathologic_stage	2000/288	970/51	2300/111	2400/57	2.5814e-05	0.000440794	3936
THCA	MMP1	pathologic_stage	22/288	17/51	38/111	49/57	5.0907e-05	0.000722813	4312
THCA	MMP10	pathologic_stage	2.9/288	2.1/51	17/111	11/57	1.0619e-05	0.000228383	4319
THCA	MMP12	pathologic_stage	32/288	10/51	62/111	55/57	3.13363e-07	1.9232e-05	4321
THCA	MMP13	pathologic_stage	29/288	3.4/51	110/111	140/57	1.14961e-14	2.22024e-10	4322
THCA	MMP14	pathologic_stage	3300/288	3000/51	4300/111	4700/57	0.00237777	0.0122035	4323
THCA	MMP2	pathologic_stage	2400/288	1700/51	3100/111	3600/57	0.00940592	0.0345947	4313
THCA	MMP3	pathologic_stage	3.1/287	0.82/51	4.5/111	21/57	1.5598e-05	0.000305212	4314
THCA	MMP9	pathologic_stage	840/288	490/51	1100/111	1200/57	0.000112606	0.0012671	4318
THCA	PECAM1	pathologic_stage	1600/288	1700/51	1400/111	1500/57	0.102666	0.20528	5175
THCA	SERPINE1	pathologic_stage	1100/288	760/51	1200/111	1500/57	0.0190605	0.0588419	5054
THCA	SPP1	pathologic_stage	1100/288	630/51	1900/111	1100/57	0.00172731	0.00960424	6696
THCA	TIMP2	pathologic_stage	4600/288	3700/51	5000/111	5300/57	0.00250961	0.0127048	7077
THCA	TNF	pathologic_stage	14/288	7.5/51	13/111	18/57	0.0339786	0.0905518	7124
THCA	TNFRSF11B	pathologic_stage	890/288	910/51	830/111	530/57	0.0158997	0.0513048	4982
THYM	FGF2	masaoka_stage		180/61	100/15	240/6	0.0954506	0.658552	2247
THYM	ICAM1	masaoka_stage		1700/61	1100/15	3000/6	0.0475695	0.588996	3383
THYM	ICAM3	masaoka_stage		2200/61	1700/15	780/6	0.0487128	0.59153	3385
THYM	ITGA2	masaoka_stage		1000/61	1400/15	3500/6	0.845313	0.977952	3673
THYM	LCP1	masaoka_stage		12000/61	8300/15	6900/6	0.0518407	0.5962	3936
THYM	MMP1	masaoka_stage		14/61	29/15	19/6	0.012835	0.495123	4312
THYM	MMP10	masaoka_stage		180/61	14/15	74/6	0.925242	0.98946	4319
THYM	MMP12	masaoka_stage		13/61	12/15	38/6	0.0074779	0.449493	4321
THYM	MMP13	masaoka_stage		450/61	100/15	100/6	0.849162	0.978612	4322
THYM	MMP14	masaoka_stage		3700/61	7800/15	6300/6	0.236008	0.780832	4323
THYM	MMP2	masaoka_stage		730/61	1500/15	1200/6	0.0023831	0.274739	4313
THYM	MMP3	masaoka_stage		120/61	630/15	270/6	0.679653	0.948249	4314
THYM	MMP9	masaoka_stage		1900/61	1600/15	1300/6	0.79477	0.970412	4318
THYM	PECAM1	masaoka_stage		1300/61	1100/15	1300/6	0.499039	0.894644	5175
THYM	SERPINE1	masaoka_stage		320/61	500/15	1000/6	0.0478681	0.589515	5054
THYM	SPP1	masaoka_stage		350/61	610/15	820/6	0.660391	0.94337	6696
THYM	TIMP2	masaoka_stage		4400/61	5200/15	3500/6	0.189522	0.744933	7077
THYM	TNF	masaoka_stage		28/61	23/15	49/6	0.710986	0.956984	7124
THYM	TNFRSF11B	masaoka_stage		36/61	4.4/15	320/6	0.204135	0.758479	4982
UCEC	FGF2	clinical_stage	89/98	100/24	120/45	82/10	0.341151	0.818174	2247
UCEC	ICAM1	clinical_stage	1300/98	1400/24	2300/45	1100/10	0.88866	0.977026	3383
UCEC	ICAM3	clinical_stage	560/98	350/24	480/45	330/10	0.0784667	0.576705	3385
UCEC	ITGA2	clinical_stage	340/98	390/24	280/45	150/10	0.29364	0.793099	3673
UCEC	LCP1	clinical_stage	1900/98	1700/24	2100/45	1800/10	0.948645	0.989883	3936
UCEC	MMP1	clinical_stage	210/98	290/24	440/45	190/10	0.833454	0.96416	4312
UCEC	MMP10	clinical_stage	460/98	310/24	1200/45	220/10	0.872172	0.973031	4319
UCEC	MMP12	clinical_stage	270/98	220/24	270/45	190/10	0.650507	0.919794	4321
UCEC	MMP13	clinical_stage	11/98	6.4/24	9.9/45	3.2/10	0.577548	0.899612	4322
UCEC	MMP14	clinical_stage	5600/98	6900/24	7200/45	6000/10	0.0586323	0.535225	4323
UCEC	MMP2	clinical_stage	6000/98	6900/24	5400/45	3400/10	0.191868	0.725338	4313
UCEC	MMP3	clinical_stage	82/98	130/24	110/45	48/10	0.234566	0.750414	4314
UCEC	MMP9	clinical_stage	2000/98	1600/24	1400/45	490/10	0.221181	0.742523	4318
UCEC	PECAM1	clinical_stage	780/98	620/24	750/45	670/10	0.547403	0.890851	5175
UCEC	SERPINE1	clinical_stage	360/98	540/24	680/45	310/10	0.383979	0.833069	5054
UCEC	SPP1	clinical_stage	9900/98	5900/24	13000/45	7800/10	0.443893	0.857521	6696
UCEC	TIMP2	clinical_stage	4100/98	4200/24	5700/45	5200/10	0.189691	0.722702	7077
UCEC	TNF	clinical_stage	130/98	130/24	160/45	150/10	0.88015	0.975523	7124
UCEC	TNFRSF11B	clinical_stage	160/98	83/24	160/45	130/10	0.455634	0.860969	4982
UCS	FGF2	clinical_stage	190/22	310/5	250/20	270/10	0.407466	0.707376	2247
UCS	ICAM1	clinical_stage	1100/22	1100/5	1600/20	890/10	0.315455	0.642803	3383
UCS	ICAM3	clinical_stage	280/22	220/5	250/20	250/10	0.955491	0.982142	3385
UCS	ITGA2	clinical_stage	360/22	89/5	190/20	120/10	0.189145	0.53661	3673
UCS	LCP1	clinical_stage	1500/22	570/5	1100/20	1000/10	0.652502	0.846184	3936
UCS	MMP1	clinical_stage	440/22	46/5	270/20	470/10	0.0409716	0.325613	4312
UCS	MMP10	clinical_stage	180/22	20/5	450/20	300/10	0.189918	0.537183	4319
UCS	MMP12	clinical_stage	81/22	5.5/5	100/20	35/10	0.028499	0.292437	4321
UCS	MMP13	clinical_stage	110/22	290/5	220/20	41/10	0.697264	0.867951	4322
UCS	MMP14	clinical_stage	14000/22	20000/5	11000/20	13000/10	0.234279	0.577719	4323
UCS	MMP2	clinical_stage	10000/22	8000/5	7200/20	13000/10	0.402855	0.70516	4313
UCS	MMP3	clinical_stage	49/22	17/5	52/20	12/10	0.537206	0.784545	4314
UCS	MMP9	clinical_stage	5100/22	1200/5	1700/20	2200/10	0.484216	0.755046	4318
UCS	PECAM1	clinical_stage	810/22	740/5	790/20	940/10	0.672231	0.855793	5175
UCS	SERPINE1	clinical_stage	890/22	530/5	730/20	1200/10	0.952937	0.981528	5054
UCS	SPP1	clinical_stage	5200/22	3000/5	3600/20	3800/10	0.791026	0.911563	6696
UCS	TIMP2	clinical_stage	12000/22	17000/5	8200/20	9700/10	0.0201944	0.26808	7077
UCS	TNF	clinical_stage	43/22	12/5	30/20	25/10	0.677265	0.858767	7124
UCS	TNFRSF11B	clinical_stage	74/22	25/5	58/20	140/10	0.475013	0.749018	4982
UVM	FGF2	pathologic_stage		25/39	22/36		0.987385	0.99929	2247
UVM	FGF2	clinical_stage		25/36	24/40		0.88897	0.980316	2247
UVM	ICAM1	pathologic_stage		1900/39	2400/36		0.0257008	0.982061	3383
UVM	ICAM1	clinical_stage		1800/36	2400/40		0.00326689	0.28547	3383
UVM	ICAM3	pathologic_stage		470/39	440/36		0.723941	0.995881	3385
UVM	ICAM3	clinical_stage		470/36	450/40		0.897148	0.98232	3385
UVM	ITGA2	pathologic_stage		17/39	31/36		0.0101873	0.982061	3673
UVM	ITGA2	clinical_stage		15/36	34/40		0.000146105	0.236968	3673
UVM	LCP1	pathologic_stage		520/39	450/36		0.62387	0.99245	3936
UVM	LCP1	clinical_stage		500/36	480/40		0.203784	0.686798	3936
UVM	MMP1	pathologic_stage		6.6/39	12/36		0.244656	0.982061	4312
UVM	MMP1	clinical_stage		6.3/36	12/40		0.0956075	0.567256	4312
UVM	MMP10	pathologic_stage		0.21/39	0.15/36		0.895099	0.99929	4319
UVM	MMP10	clinical_stage		0.18/36	0.19/40		0.747821	0.944912	4319
UVM	MMP12	pathologic_stage		24/39	11/36		0.334999	0.982061	4321
UVM	MMP12	clinical_stage		24/36	11/40		0.122411	0.611371	4321
UVM	MMP13	pathologic_stage		0.073/39	0.061/36		0.828931	0.99929	4322
UVM	MMP13	clinical_stage		0.067/36	0.066/40		0.860199	0.974528	4322
UVM	MMP14	pathologic_stage		15000/39	18000/36		0.167326	0.982061	4323
UVM	MMP14	clinical_stage		15000/36	18000/40		0.130667	0.622038	4323
UVM	MMP2	pathologic_stage		1800/39	2700/36		0.238571	0.982061	4313
UVM	MMP2	clinical_stage		1800/36	2600/40		0.302494	0.753634	4313
UVM	MMP3	pathologic_stage		0.16/39	0.23/36		0.643477	0.99245	4314
UVM	MMP3	clinical_stage		0.11/36	0.28/40		0.187188	0.67632	4314
UVM	MMP9	pathologic_stage		170/39	270/36		0.0929096	0.982061	4318
UVM	MMP9	clinical_stage		180/36	250/40		0.0709352	0.522427	4318
UVM	PECAM1	pathologic_stage		240/39	250/36		0.496188	0.99245	5175
UVM	PECAM1	clinical_stage		230/36	260/40		0.178956	0.671701	5175
UVM	SERPINE1	pathologic_stage		60/39	190/36		0.0156919	0.982061	5054
UVM	SERPINE1	clinical_stage		58/36	180/40		0.0194538	0.407601	5054
UVM	SPP1	pathologic_stage		11000/39	8200/36		0.81251	0.99929	6696
UVM	SPP1	clinical_stage		12000/36	7600/40		0.288088	0.753634	6696
UVM	TIMP2	pathologic_stage		30000/39	35000/36		0.313124	0.982061	7077
UVM	TIMP2	clinical_stage		30000/36	34000/40		0.615819	0.893313	7077
UVM	TNF	pathologic_stage		3.7/39	3.6/36		0.952805	0.99929	7124
UVM	TNF	clinical_stage		3.6/36	3.8/40		0.39572	0.795028	7124
UVM	TNFRSF11B	pathologic_stage		8.7/39	9.4/36		0.0737072	0.982061	4982
UVM	TNFRSF11B	clinical_stage		8.5/36	9.8/40		0.0359094	0.44893	4982
