# Supplementary material for: Pan-cancer analyses of senescence-related genes in extracellular matrix characterization in cancer
Source: Discov Oncol. 2023 Nov 20;14:208. doi: 10.1007/s12672-023-00828-7 (PMC10660488; doi:10.1007/s12672-023-00828-7)
Supplement: Supplementary file 17 — Supplementary file17 (XLSX 151 KB) [file 12672_2023_828_MOESM17_ESM.xlsx]

## Sheet: SheetName
Table S12 The survival difference between high and low gene expression groups in pan-cancer
cancertype	symbol	sur_type	hr_categorical(H/L)	coxp_categorical	logrankp	higher_risk_of_death	entrez
ACC	FGF2	OS	0.91263	0.809501	0.809279	Lower expr.	0
ACC	FGF2	PFS	0.788004	0.436739	0.436791	Lower expr.	0
ACC	FGF2	DSS	0.814663	0.605856	0.604901	Lower expr.	0
ACC	FGF2	DFI	0.584825	0.392431	0.386786	Lower expr.	0
ACC	ICAM1	OS	1.22437	0.596867	0.598186	Higher expr.	0
ACC	ICAM1	PFS	1.33753	0.342626	0.337924	Higher expr.	0
ACC	ICAM1	DSS	1.20505	0.638907	0.640576	Higher expr.	0
ACC	ICAM1	DFI	1.10808	0.865785	0.865727	Higher expr.	0
ACC	ICAM3	OS	1.38684	0.392374	0.391603	Higher expr.	0
ACC	ICAM3	PFS	1.01139	0.970433	0.968897	Higher expr.	0
ACC	ICAM3	DSS	1.28009	0.530582	0.531359	Higher expr.	0
ACC	ICAM3	DFI	0.87469	0.826077	0.825954	Lower expr.	0
ACC	ITGA2	OS	1.92595	0.0897126	0.0848014	Higher expr.	0
ACC	ITGA2	PFS	1.49823	0.18871	0.184579	Higher expr.	0
ACC	ITGA2	DSS	1.93125	0.101182	0.0959448	Higher expr.	0
ACC	ITGA2	DFI	0.840351	0.78168	0.781414	Lower expr.	0
ACC	LCP1	OS	0.29355	0.00501756	0.00286113	Lower expr.	0
ACC	LCP1	PFS	0.354469	0.00150717	0.000919324	Lower expr.	0
ACC	LCP1	DSS	0.259399	0.00378166	0.00182462	Lower expr.	0
ACC	LCP1	DFI	0.30051	0.055598	0.0423572	Lower expr.	0
ACC	MMP1	OS	2.6512	0.0161484	0.0124465	Higher expr.	0
ACC	MMP1	PFS	2.17335	0.0132474	0.0110955	Higher expr.	0
ACC	MMP1	DSS	3.27193	0.00744349	0.00461986	Higher expr.	0
ACC	MMP1	DFI	1.59963	0.439303	0.435161	Higher expr.	0
ACC	MMP10	OS	2.68392	0.0156499	0.0121011	Higher expr.	0
ACC	MMP10	PFS	2.23387	0.011304	0.00940205	Higher expr.	0
ACC	MMP10	DSS	2.80538	0.0163179	0.0123831	Higher expr.	0
ACC	MMP10	DFI	2.36245	0.15933	0.147397	Higher expr.	0
ACC	MMP12	OS	2.75601	0.0123367	0.00909957	Higher expr.	0
ACC	MMP12	PFS	2.08996	0.0176311	0.0151058	Higher expr.	0
ACC	MMP12	DSS	2.60021	0.0205801	0.0163066	Higher expr.	0
ACC	MMP12	DFI	1.49933	0.50488	0.502015	Higher expr.	0
ACC	MMP13	OS	2.89834	0.00546595	0.00371787	Higher expr.	0
ACC	MMP13	PFS	2.88013	0.000664927	0.000371889	Higher expr.	0
ACC	MMP13	DSS	2.85412	0.00833459	0.0059394	Higher expr.	0
ACC	MMP13	DFI	6.43569	0.00243484	0.000534996	Higher expr.	0
ACC	MMP14	OS	3.9509	0.00109887	0.000441557	Higher expr.	0
ACC	MMP14	PFS	3.31507	0.000237286	0.000106828	Higher expr.	0
ACC	MMP14	DSS	4.13403	0.00139786	0.000541602	Higher expr.	0
ACC	MMP14	DFI	2.81666	0.0899781	0.0769295	Higher expr.	0
ACC	MMP2	OS	0.803576	0.567619	0.566447	Lower expr.	0
ACC	MMP2	PFS	0.854198	0.60701	0.608643	Lower expr.	0
ACC	MMP2	DSS	0.802769	0.580755	0.579554	Lower expr.	0
ACC	MMP2	DFI	0.842606	0.777667	0.777405	Lower expr.	0
ACC	MMP3	OS	1.83773	0.116917	0.110791	Higher expr.	0
ACC	MMP3	PFS	1.71303	0.08854	0.0848064	Higher expr.	0
ACC	MMP3	DSS	1.99996	0.0817392	0.0753234	Higher expr.	0
ACC	MMP3	DFI	2.7628	0.0940048	0.0806528	Higher expr.	0
ACC	MMP9	OS	2.44418	0.0241625	0.019861	Higher expr.	0
ACC	MMP9	PFS	1.81496	0.0548256	0.0514822	Higher expr.	0
ACC	MMP9	DSS	2.48275	0.027999	0.0230266	Higher expr.	0
ACC	MMP9	DFI	0.692898	0.588153	0.586067	Lower expr.	0
ACC	PECAM1	OS	1.00024	0.999488	0.999487	Higher expr.	0
ACC	PECAM1	PFS	0.939303	0.837949	0.839918	Lower expr.	0
ACC	PECAM1	DSS	1.02144	0.956896	0.95687	Higher expr.	0
ACC	PECAM1	DFI	1.20348	0.760061	0.759732	Higher expr.	0
ACC	SERPINE1	OS	1.35589	0.427037	0.423495	Higher expr.	0
ACC	SERPINE1	PFS	1.54554	0.159909	0.155897	Higher expr.	0
ACC	SERPINE1	DSS	1.37626	0.422996	0.419151	Higher expr.	0
ACC	SERPINE1	DFI	2.09204	0.242509	0.232391	Higher expr.	0
ACC	SPP1	OS	1.54767	0.261057	0.257158	Higher expr.	0
ACC	SPP1	PFS	1.07917	0.803881	0.800489	Higher expr.	0
ACC	SPP1	DSS	1.58188	0.257116	0.252818	Higher expr.	0
ACC	SPP1	DFI	0.585962	0.396434	0.391008	Lower expr.	0
ACC	TIMP2	OS	1.47913	0.307008	0.30381	Higher expr.	0
ACC	TIMP2	PFS	1.77271	0.0635959	0.0603851	Higher expr.	0
ACC	TIMP2	DSS	1.47178	0.331774	0.328632	Higher expr.	0
ACC	TIMP2	DFI	1.55434	0.467205	0.463633	Higher expr.	0
ACC	TNF	OS	1.02936	0.93954	0.939569	Higher expr.	0
ACC	TNF	PFS	0.814531	0.506149	0.50861	Lower expr.	0
ACC	TNF	DSS	0.945398	0.886973	0.886757	Lower expr.	0
ACC	TNF	DFI	0.572673	0.363138	0.357337	Lower expr.	0
ACC	TNFRSF11B	OS	0.850684	0.669976	0.667474	Lower expr.	0
ACC	TNFRSF11B	PFS	0.804868	0.477329	0.479431	Lower expr.	0
ACC	TNFRSF11B	DSS	0.764177	0.496024	0.492603	Lower expr.	0
ACC	TNFRSF11B	DFI	1.42888	0.569471	0.567433	Higher expr.	0
BLCA	FGF2	OS	1.46631	0.0117892	0.0112256	Higher expr.	0
BLCA	FGF2	PFS	1.33708	0.0289345	0.0283923	Higher expr.	0
BLCA	FGF2	DSS	1.61425	0.00985956	0.0091546	Higher expr.	0
BLCA	FGF2	DFI	0.903783	0.782496	0.782409	Lower expr.	0
BLCA	ICAM1	OS	1.09902	0.530481	0.529113	Higher expr.	0
BLCA	ICAM1	PFS	1.04831	0.721833	0.721689	Higher expr.	0
BLCA	ICAM1	DSS	1.14527	0.456719	0.45556	Higher expr.	0
BLCA	ICAM1	DFI	0.77383	0.482876	0.481705	Lower expr.	0
BLCA	ICAM3	OS	0.984979	0.919696	0.920463	Lower expr.	0
BLCA	ICAM3	PFS	0.884254	0.352661	0.352948	Lower expr.	0
BLCA	ICAM3	DSS	0.775502	0.169041	0.168088	Lower expr.	0
BLCA	ICAM3	DFI	0.434185	0.0299578	0.0254828	Lower expr.	0
BLCA	ITGA2	OS	1.12412	0.436466	0.436301	Higher expr.	0
BLCA	ITGA2	PFS	1.02362	0.860283	0.86015	Higher expr.	0
BLCA	ITGA2	DSS	1.11555	0.548405	0.548096	Higher expr.	0
BLCA	ITGA2	DFI	0.837788	0.625105	0.624663	Lower expr.	0
BLCA	LCP1	OS	1.08789	0.575519	0.575051	Higher expr.	0
BLCA	LCP1	PFS	1.1307	0.355419	0.355334	Higher expr.	0
BLCA	LCP1	DSS	1.07382	0.696326	0.69611	Higher expr.	0
BLCA	LCP1	DFI	1.30702	0.461022	0.459726	Higher expr.	0
BLCA	MMP1	OS	0.953486	0.751024	0.751072	Lower expr.	0
BLCA	MMP1	PFS	1.02154	0.871997	0.871395	Higher expr.	0
BLCA	MMP1	DSS	0.966112	0.849732	0.850223	Lower expr.	0
BLCA	MMP1	DFI	1.00247	0.994517	0.994517	Higher expr.	0
BLCA	MMP10	OS	0.912443	0.542817	0.542287	Lower expr.	0
BLCA	MMP10	PFS	0.946464	0.677722	0.676921	Lower expr.	0
BLCA	MMP10	DSS	0.964383	0.842315	0.842683	Lower expr.	0
BLCA	MMP10	DFI	1.26593	0.514389	0.513426	Higher expr.	0
BLCA	MMP12	OS	0.817306	0.180769	0.180684	Lower expr.	0
BLCA	MMP12	PFS	0.924386	0.553228	0.553072	Lower expr.	0
BLCA	MMP12	DSS	0.795537	0.210835	0.21063	Lower expr.	0
BLCA	MMP12	DFI	0.946036	0.878602	0.878587	Lower expr.	0
BLCA	MMP13	OS	1.2394	0.154704	0.15361	Higher expr.	0
BLCA	MMP13	PFS	1.24543	0.0983844	0.0979188	Higher expr.	0
BLCA	MMP13	DSS	1.30022	0.151586	0.150357	Higher expr.	0
BLCA	MMP13	DFI	1.05495	0.882164	0.88215	Higher expr.	0
BLCA	MMP14	OS	1.46892	0.0112566	0.0107713	Higher expr.	0
BLCA	MMP14	PFS	1.40736	0.0101981	0.00982491	Higher expr.	0
BLCA	MMP14	DSS	1.51245	0.0247982	0.0238111	Higher expr.	0
BLCA	MMP14	DFI	1.17484	0.654211	0.653863	Higher expr.	0
BLCA	MMP2	OS	1.22379	0.18216	0.180997	Higher expr.	0
BLCA	MMP2	PFS	1.0619	0.650763	0.649896	Higher expr.	0
BLCA	MMP2	DSS	1.35672	0.097739	0.0965414	Higher expr.	0
BLCA	MMP2	DFI	0.548875	0.115287	0.110328	Lower expr.	0
BLCA	MMP3	OS	0.976436	0.87388	0.875356	Lower expr.	0
BLCA	MMP3	PFS	0.883748	0.351498	0.352261	Lower expr.	0
BLCA	MMP3	DSS	0.946268	0.761709	0.762875	Lower expr.	0
BLCA	MMP3	DFI	0.804658	0.548028	0.547252	Lower expr.	0
BLCA	MMP9	OS	1.36406	0.0403789	0.0395183	Higher expr.	0
BLCA	MMP9	PFS	1.20801	0.154226	0.15328	Higher expr.	0
BLCA	MMP9	DSS	1.59578	0.0114369	0.0107036	Higher expr.	0
BLCA	MMP9	DFI	0.722384	0.38703	0.384958	Lower expr.	0
BLCA	PECAM1	OS	1.09384	0.550092	0.548858	Higher expr.	0
BLCA	PECAM1	PFS	0.979099	0.873098	0.873387	Lower expr.	0
BLCA	PECAM1	DSS	1.112	0.559549	0.558888	Higher expr.	0
BLCA	PECAM1	DFI	1.01323	0.970903	0.970902	Higher expr.	0
BLCA	SERPINE1	OS	1.34639	0.0500549	0.0492887	Higher expr.	0
BLCA	SERPINE1	PFS	1.25189	0.092553	0.0916285	Higher expr.	0
BLCA	SERPINE1	DSS	1.37355	0.083955	0.0827469	Higher expr.	0
BLCA	SERPINE1	DFI	0.819451	0.594679	0.594144	Lower expr.	0
BLCA	SPP1	OS	1.1053	0.505934	0.505005	Higher expr.	0
BLCA	SPP1	PFS	1.13116	0.352567	0.351475	Higher expr.	0
BLCA	SPP1	DSS	1.23144	0.25629	0.255653	Higher expr.	0
BLCA	SPP1	DFI	0.55903	0.12491	0.119924	Lower expr.	0
BLCA	TIMP2	OS	1.48034	0.0102668	0.00973572	Higher expr.	0
BLCA	TIMP2	PFS	1.33517	0.0300016	0.029401	Higher expr.	0
BLCA	TIMP2	DSS	1.63478	0.0078223	0.00722907	Higher expr.	0
BLCA	TIMP2	DFI	0.945813	0.880737	0.880722	Lower expr.	0
BLCA	TNF	OS	0.909106	0.525217	0.525779	Lower expr.	0
BLCA	TNF	PFS	0.849743	0.219785	0.219497	Lower expr.	0
BLCA	TNF	DSS	0.867443	0.435104	0.435264	Lower expr.	0
BLCA	TNF	DFI	0.648092	0.233581	0.229937	Lower expr.	0
BLCA	TNFRSF11B	OS	1.46314	0.0123213	0.011753	Higher expr.	0
BLCA	TNFRSF11B	PFS	1.22978	0.118651	0.117995	Higher expr.	0
BLCA	TNFRSF11B	DSS	1.6116	0.00984531	0.00917028	Higher expr.	0
BLCA	TNFRSF11B	DFI	0.998608	0.996924	0.996924	Lower expr.	0
BRCA	FGF2	OS	0.793098	0.152639	0.151975	Lower expr.	0
BRCA	FGF2	PFS	0.818106	0.151038	0.150766	Lower expr.	0
BRCA	FGF2	DSS	0.655135	0.0550411	0.0533542	Lower expr.	0
BRCA	FGF2	DFI	0.806221	0.324724	0.3238	Lower expr.	0
BRCA	ICAM1	OS	0.710694	0.0355222	0.0345882	Lower expr.	0
BRCA	ICAM1	PFS	0.778252	0.0732888	0.072459	Lower expr.	0
BRCA	ICAM1	DSS	0.703236	0.107977	0.105953	Lower expr.	0
BRCA	ICAM1	DFI	0.72431	0.142126	0.140427	Lower expr.	0
BRCA	ICAM3	OS	0.941066	0.707322	0.708235	Lower expr.	0
BRCA	ICAM3	PFS	0.8746	0.337034	0.337101	Lower expr.	0
BRCA	ICAM3	DSS	1.02646	0.904352	0.901813	Higher expr.	0
BRCA	ICAM3	DFI	0.921389	0.708068	0.707991	Lower expr.	0
BRCA	ITGA2	OS	0.960556	0.803013	0.802908	Lower expr.	0
BRCA	ITGA2	PFS	0.839648	0.209373	0.208822	Lower expr.	0
BRCA	ITGA2	DSS	0.762359	0.215077	0.213085	Lower expr.	0
BRCA	ITGA2	DFI	0.572958	0.0138266	0.0126467	Lower expr.	0
BRCA	LCP1	OS	0.735662	0.0592299	0.0583434	Lower expr.	0
BRCA	LCP1	PFS	0.746742	0.0366522	0.0360439	Lower expr.	0
BRCA	LCP1	DSS	0.678516	0.0769209	0.0755148	Lower expr.	0
BRCA	LCP1	DFI	0.70339	0.11002	0.108214	Lower expr.	0
BRCA	MMP1	OS	1.25059	0.16679	0.165684	Higher expr.	0
BRCA	MMP1	PFS	1.32639	0.0433365	0.0425783	Higher expr.	0
BRCA	MMP1	DSS	1.62333	0.0287732	0.0271612	Higher expr.	0
BRCA	MMP1	DFI	1.42383	0.109171	0.107343	Higher expr.	0
BRCA	MMP10	OS	0.841267	0.288417	0.287442	Lower expr.	0
BRCA	MMP10	PFS	0.839195	0.209861	0.209082	Lower expr.	0
BRCA	MMP10	DSS	0.950737	0.816559	0.816672	Lower expr.	0
BRCA	MMP10	DFI	0.889661	0.593371	0.593161	Lower expr.	0
BRCA	MMP12	OS	0.81703	0.217269	0.216114	Lower expr.	0
BRCA	MMP12	PFS	0.882502	0.371172	0.370583	Lower expr.	0
BRCA	MMP12	DSS	0.871152	0.527007	0.526463	Lower expr.	0
BRCA	MMP12	DFI	0.984192	0.941803	0.941803	Lower expr.	0
BRCA	MMP13	OS	1.14327	0.406625	0.406291	Higher expr.	0
BRCA	MMP13	PFS	1.09113	0.530887	0.5308	Higher expr.	0
BRCA	MMP13	DSS	1.48754	0.0707645	0.0688549	Higher expr.	0
BRCA	MMP13	DFI	1.28656	0.250573	0.249324	Higher expr.	0
BRCA	MMP14	OS	1.17997	0.307538	0.307527	Higher expr.	0
BRCA	MMP14	PFS	1.0787	0.588494	0.589237	Higher expr.	0
BRCA	MMP14	DSS	1.70923	0.0154783	0.0143415	Higher expr.	0
BRCA	MMP14	DFI	1.22342	0.357058	0.356254	Higher expr.	0
BRCA	MMP2	OS	1.07881	0.639301	0.640164	Higher expr.	0
BRCA	MMP2	PFS	1.03874	0.785596	0.786603	Higher expr.	0
BRCA	MMP2	DSS	1.30895	0.218313	0.217169	Higher expr.	0
BRCA	MMP2	DFI	1.04853	0.828304	0.828288	Higher expr.	0
BRCA	MMP3	OS	0.985381	0.927769	0.926187	Lower expr.	0
BRCA	MMP3	PFS	0.971611	0.837259	0.835546	Lower expr.	0
BRCA	MMP3	DSS	1.22942	0.349601	0.350319	Higher expr.	0
BRCA	MMP3	DFI	1.19543	0.418431	0.417825	Higher expr.	0
BRCA	MMP9	OS	0.95272	0.764148	0.76478	Lower expr.	0
BRCA	MMP9	PFS	0.921	0.554805	0.555636	Lower expr.	0
BRCA	MMP9	DSS	1.13846	0.552974	0.550002	Higher expr.	0
BRCA	MMP9	DFI	0.992379	0.972064	0.972064	Lower expr.	0
BRCA	PECAM1	OS	0.99123	0.956809	0.956692	Lower expr.	0
BRCA	PECAM1	PFS	0.956893	0.753146	0.752989	Lower expr.	0
BRCA	PECAM1	DSS	0.960695	0.854474	0.855033	Lower expr.	0
BRCA	PECAM1	DFI	0.838728	0.422803	0.422215	Lower expr.	0
BRCA	SERPINE1	OS	1.21157	0.239876	0.240487	Higher expr.	0
BRCA	SERPINE1	PFS	1.20988	0.175559	0.175956	Higher expr.	0
BRCA	SERPINE1	DSS	1.49889	0.0715195	0.0701547	Higher expr.	0
BRCA	SERPINE1	DFI	1.21946	0.367533	0.366755	Higher expr.	0
BRCA	SPP1	OS	0.990525	0.953039	0.953053	Lower expr.	0
BRCA	SPP1	PFS	1.1073	0.463992	0.463556	Higher expr.	0
BRCA	SPP1	DSS	1.11055	0.629293	0.628509	Higher expr.	0
BRCA	SPP1	DFI	1.30251	0.228366	0.22702	Higher expr.	0
BRCA	TIMP2	OS	1.03963	0.810909	0.812874	Higher expr.	0
BRCA	TIMP2	PFS	1.03326	0.816644	0.818786	Higher expr.	0
BRCA	TIMP2	DSS	1.22731	0.347958	0.349076	Higher expr.	0
BRCA	TIMP2	DFI	0.913787	0.680915	0.680814	Lower expr.	0
BRCA	TNF	OS	0.867821	0.382935	0.383637	Lower expr.	0
BRCA	TNF	PFS	0.91766	0.538242	0.539454	Lower expr.	0
BRCA	TNF	DSS	0.974269	0.904845	0.908459	Lower expr.	0
BRCA	TNF	DFI	1.00792	0.97124	0.97124	Higher expr.	0
BRCA	TNFRSF11B	OS	0.825487	0.236396	0.235091	Lower expr.	0
BRCA	TNFRSF11B	PFS	0.834276	0.193615	0.192453	Lower expr.	0
BRCA	TNFRSF11B	DSS	0.860054	0.488149	0.485885	Lower expr.	0
BRCA	TNFRSF11B	DFI	0.730707	0.153004	0.15134	Lower expr.	0
CESC	FGF2	OS	0.915353	0.70602	0.706966	Lower expr.	0
CESC	FGF2	PFS	1.06103	0.781331	0.780506	Higher expr.	0
CESC	FGF2	DSS	0.994574	0.983912	0.984434	Lower expr.	0
CESC	FGF2	DFI	1.45092	0.348669	0.346429	Higher expr.	0
CESC	ICAM1	OS	1.08397	0.730982	0.730445	Higher expr.	0
CESC	ICAM1	PFS	0.837556	0.407293	0.40719	Lower expr.	0
CESC	ICAM1	DSS	0.93932	0.816793	0.817206	Lower expr.	0
CESC	ICAM1	DFI	0.575786	0.18087	0.175662	Lower expr.	0
CESC	ICAM3	OS	0.816723	0.389322	0.38767	Lower expr.	0
CESC	ICAM3	PFS	0.69368	0.0899214	0.0880173	Lower expr.	0
CESC	ICAM3	DSS	0.733014	0.25377	0.251567	Lower expr.	0
CESC	ICAM3	DFI	0.664909	0.304107	0.301258	Lower expr.	0
CESC	ITGA2	OS	1.31591	0.245963	0.244812	Higher expr.	0
CESC	ITGA2	PFS	1.00471	0.982473	0.983356	Higher expr.	0
CESC	ITGA2	DSS	1.27437	0.370499	0.369304	Higher expr.	0
CESC	ITGA2	DFI	0.727595	0.441343	0.439979	Lower expr.	0
CESC	LCP1	OS	0.813811	0.380242	0.379617	Lower expr.	0
CESC	LCP1	PFS	0.819256	0.350538	0.349971	Lower expr.	0
CESC	LCP1	DSS	0.688578	0.172669	0.170331	Lower expr.	0
CESC	LCP1	DFI	0.61209	0.216293	0.212105	Lower expr.	0
CESC	MMP1	OS	1.8175	0.0133618	0.012029	Higher expr.	0
CESC	MMP1	PFS	1.52767	0.049628	0.0479298	Higher expr.	0
CESC	MMP1	DSS	1.86717	0.0246705	0.0223825	Higher expr.	0
CESC	MMP1	DFI	1.45032	0.345514	0.34268	Higher expr.	0
CESC	MMP10	OS	0.852988	0.498454	0.498862	Lower expr.	0
CESC	MMP10	PFS	0.813661	0.335513	0.33487	Lower expr.	0
CESC	MMP10	DSS	0.897505	0.688834	0.689088	Lower expr.	0
CESC	MMP10	DFI	0.82587	0.627074	0.625601	Lower expr.	0
CESC	MMP12	OS	1.43918	0.126067	0.124021	Higher expr.	0
CESC	MMP12	PFS	0.997949	0.992326	0.992774	Lower expr.	0
CESC	MMP12	DSS	1.58209	0.095651	0.0928415	Higher expr.	0
CESC	MMP12	DFI	0.673462	0.327428	0.32475	Lower expr.	0
CESC	MMP13	OS	1.21277	0.413826	0.412992	Higher expr.	0
CESC	MMP13	PFS	1.03253	0.880721	0.880691	Higher expr.	0
CESC	MMP13	DSS	1.25128	0.410141	0.409095	Higher expr.	0
CESC	MMP13	DFI	1.06484	0.872864	0.872837	Higher expr.	0
CESC	MMP14	OS	1.1983	0.444468	0.443972	Higher expr.	0
CESC	MMP14	PFS	0.994847	0.980723	0.980372	Lower expr.	0
CESC	MMP14	DSS	1.09378	0.740636	0.74001	Higher expr.	0
CESC	MMP14	DFI	0.889714	0.76676	0.766576	Lower expr.	0
CESC	MMP2	OS	1.19538	0.447179	0.446261	Higher expr.	0
CESC	MMP2	PFS	1.27855	0.251337	0.250338	Higher expr.	0
CESC	MMP2	DSS	1.22258	0.458075	0.456906	Higher expr.	0
CESC	MMP2	DFI	1.4307	0.364887	0.362931	Higher expr.	0
CESC	MMP3	OS	1.63134	0.0411361	0.0391382	Higher expr.	0
CESC	MMP3	PFS	1.50472	0.0580205	0.0562752	Higher expr.	0
CESC	MMP3	DSS	1.61784	0.0786762	0.0758062	Higher expr.	0
CESC	MMP3	DFI	1.32869	0.470213	0.468693	Higher expr.	0
CESC	MMP9	OS	1.02274	0.923648	0.922428	Higher expr.	0
CESC	MMP9	PFS	0.734641	0.151244	0.150012	Lower expr.	0
CESC	MMP9	DSS	0.836985	0.511353	0.511125	Lower expr.	0
CESC	MMP9	DFI	0.637296	0.256818	0.252745	Lower expr.	0
CESC	PECAM1	OS	0.802609	0.349656	0.348653	Lower expr.	0
CESC	PECAM1	PFS	0.860618	0.482609	0.482189	Lower expr.	0
CESC	PECAM1	DSS	0.742038	0.271117	0.269305	Lower expr.	0
CESC	PECAM1	DFI	0.753433	0.473203	0.471712	Lower expr.	0
CESC	SERPINE1	OS	1.87212	0.0104735	0.00924627	Higher expr.	0
CESC	SERPINE1	PFS	1.43005	0.0971431	0.0952453	Higher expr.	0
CESC	SERPINE1	DSS	1.99407	0.0140296	0.0122374	Higher expr.	0
CESC	SERPINE1	DFI	1.69489	0.184352	0.179668	Higher expr.	0
CESC	SPP1	OS	1.89302	0.00870743	0.00764828	Higher expr.	0
CESC	SPP1	PFS	1.74946	0.0108658	0.00988881	Higher expr.	0
CESC	SPP1	DSS	1.87436	0.0241247	0.0219466	Higher expr.	0
CESC	SPP1	DFI	1.38939	0.40412	0.40205	Higher expr.	0
CESC	TIMP2	OS	1.46059	0.10927	0.107023	Higher expr.	0
CESC	TIMP2	PFS	1.7078	0.0138389	0.0127473	Higher expr.	0
CESC	TIMP2	DSS	1.39111	0.224041	0.221667	Higher expr.	0
CESC	TIMP2	DFI	2.36634	0.0371939	0.0318141	Higher expr.	0
CESC	TNF	OS	1.59385	0.0490035	0.0472187	Higher expr.	0
CESC	TNF	PFS	1.27566	0.255166	0.254612	Higher expr.	0
CESC	TNF	DSS	1.56729	0.0990075	0.0964264	Higher expr.	0
CESC	TNF	DFI	0.744769	0.464943	0.463146	Lower expr.	0
CESC	TNFRSF11B	OS	1.86441	0.00938334	0.00833464	Higher expr.	0
CESC	TNFRSF11B	PFS	1.67334	0.0177954	0.0166441	Higher expr.	0
CESC	TNFRSF11B	DSS	2.22877	0.00448537	0.00354283	Higher expr.	0
CESC	TNFRSF11B	DFI	1.59372	0.238192	0.233982	Higher expr.	0
CHOL	FGF2	OS	1.74359	0.262696	0.256825	Higher expr.	0
CHOL	FGF2	PFS	0.901265	0.807725	0.807641	Lower expr.	0
CHOL	FGF2	DSS	1.84893	0.24742	0.240367	Higher expr.	0
CHOL	FGF2	DFI	1.43313	0.603412	0.601498	Higher expr.	0
CHOL	ICAM1	OS	0.726275	0.517162	0.515396	Lower expr.	0
CHOL	ICAM1	PFS	0.887086	0.780115	0.779989	Lower expr.	0
CHOL	ICAM1	DSS	0.683987	0.472035	0.469405	Lower expr.	0
CHOL	ICAM1	DFI	0.658033	0.518649	0.515678	Lower expr.	0
CHOL	ICAM3	OS	0.882081	0.791252	0.791123	Lower expr.	0
CHOL	ICAM3	PFS	0.688068	0.382529	0.379823	Lower expr.	0
CHOL	ICAM3	DSS	0.689178	0.463177	0.460688	Lower expr.	0
CHOL	ICAM3	DFI	0.449008	0.209578	0.198143	Lower expr.	0
CHOL	ITGA2	OS	0.67063	0.409396	0.406313	Lower expr.	0
CHOL	ITGA2	PFS	0.779969	0.562222	0.561224	Lower expr.	0
CHOL	ITGA2	DSS	0.812971	0.681807	0.681276	Lower expr.	0
CHOL	ITGA2	DFI	1.19336	0.780403	0.780128	Higher expr.	0
CHOL	LCP1	OS	0.757735	0.559668	0.558428	Lower expr.	0
CHOL	LCP1	PFS	0.826522	0.660767	0.660316	Lower expr.	0
CHOL	LCP1	DSS	0.71476	0.506129	0.504156	Lower expr.	0
CHOL	LCP1	DFI	0.829186	0.770491	0.770187	Lower expr.	0
CHOL	MMP1	OS	0.791621	0.639922	0.639211	Lower expr.	0
CHOL	MMP1	PFS	0.693548	0.395621	0.393077	Lower expr.	0
CHOL	MMP1	DSS	0.78786	0.655338	0.654624	Lower expr.	0
CHOL	MMP1	DFI	0.948621	0.933708	0.9337	Lower expr.	0
CHOL	MMP10	OS	1.17353	0.737308	0.737047	Higher expr.	0
CHOL	MMP10	PFS	0.949101	0.902709	0.902698	Lower expr.	0
CHOL	MMP10	DSS	1.5584	0.393079	0.389339	Higher expr.	0
CHOL	MMP10	DFI	1.37989	0.612821	0.611338	Higher expr.	0
CHOL	MMP12	OS	0.587724	0.272199	0.266616	Lower expr.	0
CHOL	MMP12	PFS	0.441466	0.0742022	0.0673565	Lower expr.	0
CHOL	MMP12	DSS	0.700371	0.480248	0.477943	Lower expr.	0
CHOL	MMP12	DFI	0.754839	0.668596	0.667621	Lower expr.	0
CHOL	MMP13	OS	1.1933	0.71708	0.716735	Higher expr.	0
CHOL	MMP13	PFS	0.937345	0.879765	0.879744	Lower expr.	0
CHOL	MMP13	DSS	1.243	0.675299	0.674708	Higher expr.	0
CHOL	MMP13	DFI	0.940614	0.924654	0.924642	Lower expr.	0
CHOL	MMP14	OS	0.92315	0.870058	0.870025	Lower expr.	0
CHOL	MMP14	PFS	1.22942	0.629036	0.628436	Higher expr.	0
CHOL	MMP14	DSS	1.16672	0.767283	0.767067	Higher expr.	0
CHOL	MMP14	DFI	1.71011	0.397797	0.392247	Higher expr.	0
CHOL	MMP2	OS	0.98443	0.974368	0.974368	Lower expr.	0
CHOL	MMP2	PFS	0.520444	0.138124	0.131764	Lower expr.	0
CHOL	MMP2	DSS	0.973564	0.958956	0.958955	Lower expr.	0
CHOL	MMP2	DFI	0.384855	0.143179	0.129214	Lower expr.	0
CHOL	MMP3	OS	1.18279	0.724579	0.724287	Higher expr.	0
CHOL	MMP3	PFS	0.777069	0.556467	0.55543	Lower expr.	0
CHOL	MMP3	DSS	1.54946	0.390784	0.387266	Higher expr.	0
CHOL	MMP3	DFI	1.19686	0.781011	0.780727	Higher expr.	0
CHOL	MMP9	OS	0.84434	0.726771	0.726492	Lower expr.	0
CHOL	MMP9	PFS	0.70261	0.413072	0.410745	Lower expr.	0
CHOL	MMP9	DSS	0.637396	0.387677	0.384232	Lower expr.	0
CHOL	MMP9	DFI	0.726449	0.614548	0.61307	Lower expr.	0
CHOL	PECAM1	OS	0.934699	0.891659	0.89164	Lower expr.	0
CHOL	PECAM1	PFS	0.363543	0.0288283	0.0229877	Lower expr.	0
CHOL	PECAM1	DSS	0.902373	0.846479	0.846415	Lower expr.	0
CHOL	PECAM1	DFI	0.189683	0.016795	0.00777338	Lower expr.	0
CHOL	SERPINE1	OS	1.17176	0.741172	0.740927	Higher expr.	0
CHOL	SERPINE1	PFS	1.10691	0.813192	0.813115	Higher expr.	0
CHOL	SERPINE1	DSS	1.15761	0.774338	0.774156	Higher expr.	0
CHOL	SERPINE1	DFI	1.89078	0.324972	0.316947	Higher expr.	0
CHOL	SPP1	OS	0.818675	0.672638	0.672137	Lower expr.	0
CHOL	SPP1	PFS	1.43547	0.40567	0.403153	Higher expr.	0
CHOL	SPP1	DSS	0.791533	0.641414	0.640672	Lower expr.	0
CHOL	SPP1	DFI	1.20572	0.768286	0.767965	Higher expr.	0
CHOL	TIMP2	OS	0.374777	0.0510089	0.0425693	Lower expr.	0
CHOL	TIMP2	PFS	0.467386	0.0820765	0.0752083	Lower expr.	0
CHOL	TIMP2	DSS	0.434751	0.108735	0.0991179	Lower expr.	0
CHOL	TIMP2	DFI	0.782649	0.705717	0.705032	Lower expr.	0
CHOL	TNF	OS	0.534232	0.217764	0.21039	Lower expr.	0
CHOL	TNF	PFS	0.519875	0.148078	0.14167	Lower expr.	0
CHOL	TNF	DSS	0.480625	0.181939	0.172423	Lower expr.	0
CHOL	TNF	DFI	0.506577	0.286847	0.27805	Lower expr.	0
CHOL	TNFRSF11B	OS	1.25809	0.643171	0.642503	Higher expr.	0
CHOL	TNFRSF11B	PFS	1.03422	0.937482	0.937479	Higher expr.	0
CHOL	TNFRSF11B	DSS	1.67418	0.331178	0.326396	Higher expr.	0
CHOL	TNFRSF11B	DFI	1.9833	0.323015	0.313833	Higher expr.	0
COAD	FGF2	OS	1.46674	0.11455	0.112413	Higher expr.	0
COAD	FGF2	PFS	1.32411	0.148079	0.146546	Higher expr.	0
COAD	FGF2	DSS	2.34959	0.0159581	0.0130418	Higher expr.	0
COAD	FGF2	DFI	0.869011	0.780913	0.780739	Lower expr.	0
COAD	ICAM1	OS	1.5209	0.0854759	0.083317	Higher expr.	0
COAD	ICAM1	PFS	1.26946	0.221677	0.220032	Higher expr.	0
COAD	ICAM1	DSS	2.47193	0.0110666	0.00868068	Higher expr.	0
COAD	ICAM1	DFI	0.794708	0.659333	0.658662	Lower expr.	0
COAD	ICAM3	OS	0.884133	0.611217	0.610996	Lower expr.	0
COAD	ICAM3	PFS	0.807532	0.271701	0.270632	Lower expr.	0
COAD	ICAM3	DSS	1.22088	0.553679	0.553035	Higher expr.	0
COAD	ICAM3	DFI	0.410944	0.0885974	0.0790644	Lower expr.	0
COAD	ITGA2	OS	0.804121	0.369882	0.368941	Lower expr.	0
COAD	ITGA2	PFS	0.833977	0.350669	0.351152	Lower expr.	0
COAD	ITGA2	DSS	0.882561	0.708572	0.708392	Lower expr.	0
COAD	ITGA2	DFI	0.885178	0.808888	0.808772	Lower expr.	0
COAD	LCP1	OS	1.04516	0.856752	0.856741	Higher expr.	0
COAD	LCP1	PFS	0.914929	0.651642	0.652532	Lower expr.	0
COAD	LCP1	DSS	1.41036	0.308908	0.306623	Higher expr.	0
COAD	LCP1	DFI	0.467278	0.158952	0.149157	Lower expr.	0
COAD	MMP1	OS	0.911221	0.70056	0.700459	Lower expr.	0
COAD	MMP1	PFS	0.816485	0.297417	0.296266	Lower expr.	0
COAD	MMP1	DSS	0.881085	0.705256	0.705071	Lower expr.	0
COAD	MMP1	DFI	0.321246	0.0407782	0.0324111	Lower expr.	0
COAD	MMP10	OS	0.689203	0.132013	0.129815	Lower expr.	0
COAD	MMP10	PFS	0.796041	0.243429	0.242519	Lower expr.	0
COAD	MMP10	DSS	0.614036	0.154567	0.150557	Lower expr.	0
COAD	MMP10	DFI	0.520652	0.196909	0.189204	Lower expr.	0
COAD	MMP12	OS	0.821557	0.41909	0.418348	Lower expr.	0
COAD	MMP12	PFS	0.775495	0.193414	0.19258	Lower expr.	0
COAD	MMP12	DSS	0.811261	0.533601	0.532862	Lower expr.	0
COAD	MMP12	DFI	0.277717	0.0276159	0.0188316	Lower expr.	0
COAD	MMP13	OS	0.97251	0.908249	0.908246	Lower expr.	0
COAD	MMP13	PFS	1.00774	0.968359	0.967403	Higher expr.	0
COAD	MMP13	DSS	1.20863	0.570945	0.570375	Higher expr.	0
COAD	MMP13	DFI	0.806801	0.671445	0.670865	Lower expr.	0
COAD	MMP14	OS	1.7991	0.0167937	0.0153378	Higher expr.	0
COAD	MMP14	PFS	1.84182	0.0019684	0.00168613	Higher expr.	0
COAD	MMP14	DSS	2.74849	0.00535198	0.00370071	Higher expr.	0
COAD	MMP14	DFI	2.43949	0.0851346	0.0761526	Higher expr.	0
COAD	MMP2	OS	1.51022	0.0929174	0.0907892	Higher expr.	0
COAD	MMP2	PFS	1.48753	0.043199	0.0418414	Higher expr.	0
COAD	MMP2	DSS	1.99458	0.0458459	0.0418898	Higher expr.	0
COAD	MMP2	DFI	1.47197	0.443438	0.440719	Higher expr.	0
COAD	MMP3	OS	0.894917	0.6471	0.646933	Lower expr.	0
COAD	MMP3	PFS	0.768236	0.179116	0.177544	Lower expr.	0
COAD	MMP3	DSS	1.026	0.938692	0.93869	Higher expr.	0
COAD	MMP3	DFI	0.503967	0.186306	0.177999	Lower expr.	0
COAD	MMP9	OS	1.01236	0.959419	0.959419	Higher expr.	0
COAD	MMP9	PFS	0.939431	0.747887	0.748289	Lower expr.	0
COAD	MMP9	DSS	1.19281	0.597844	0.597373	Higher expr.	0
COAD	MMP9	DFI	0.762587	0.599896	0.598784	Lower expr.	0
COAD	PECAM1	OS	1.16376	0.529778	0.529389	Higher expr.	0
COAD	PECAM1	PFS	1.16659	0.426981	0.426064	Higher expr.	0
COAD	PECAM1	DSS	1.71657	0.114568	0.11025	Higher expr.	0
COAD	PECAM1	DFI	0.546469	0.262989	0.255802	Lower expr.	0
COAD	SERPINE1	OS	1.48039	0.106498	0.104319	Higher expr.	0
COAD	SERPINE1	PFS	1.28701	0.194898	0.193203	Higher expr.	0
COAD	SERPINE1	DSS	2.26416	0.0211544	0.017844	Higher expr.	0
COAD	SERPINE1	DFI	1.08979	0.865014	0.864975	Higher expr.	0
COAD	SPP1	OS	1.71901	0.0274434	0.0257139	Higher expr.	0
COAD	SPP1	PFS	1.50854	0.0366883	0.0354563	Higher expr.	0
COAD	SPP1	DSS	1.94924	0.0530191	0.0489464	Higher expr.	0
COAD	SPP1	DFI	1.06831	0.899505	0.899487	Higher expr.	0
COAD	TIMP2	OS	1.6277	0.0465688	0.04455	Higher expr.	0
COAD	TIMP2	PFS	1.52496	0.0308965	0.0296903	Higher expr.	0
COAD	TIMP2	DSS	2.41579	0.0130888	0.0104633	Higher expr.	0
COAD	TIMP2	DFI	1.0939	0.859501	0.859456	Higher expr.	0
COAD	TNF	OS	0.79367	0.341089	0.340032	Lower expr.	0
COAD	TNF	PFS	0.820201	0.307641	0.307298	Lower expr.	0
COAD	TNF	DSS	0.856156	0.642608	0.642278	Lower expr.	0
COAD	TNF	DFI	0.417783	0.0923855	0.0826647	Lower expr.	0
COAD	TNFRSF11B	OS	0.84099	0.480192	0.479658	Lower expr.	0
COAD	TNFRSF11B	PFS	0.928618	0.703368	0.705549	Lower expr.	0
COAD	TNFRSF11B	DSS	1.00667	0.984233	0.984233	Higher expr.	0
COAD	TNFRSF11B	DFI	1.36462	0.548138	0.54655	Higher expr.	0
DLBC	FGF2	OS	4.22784	0.084057	0.0623573	Higher expr.	0
DLBC	FGF2	PFS	1.72501	0.300437	0.294954	Higher expr.	0
DLBC	FGF2	DSS	3.23766	0.309589	0.282383	Higher expr.	0
DLBC	FGF2	DFI	1.07696	0.952012	0.952001	Higher expr.	0
DLBC	ICAM1	OS	0.686561	0.623149	0.621124	Lower expr.	0
DLBC	ICAM1	PFS	0.230902	0.0310253	0.0199128	Lower expr.	0
DLBC	ICAM1	DSS	0.951696	0.960528	0.960524	Lower expr.	0
DLBC	ICAM1	DFI	1.19531e-10	0.999497	0.022427	Lower expr.	0
DLBC	ICAM3	OS	1.65202	0.49314	0.48868	Higher expr.	0
DLBC	ICAM3	PFS	1.18002	0.749853	0.749582	Higher expr.	0
DLBC	ICAM3	DSS	3.33859	0.296499	0.267724	Higher expr.	0
DLBC	ICAM3	DFI	1.80558	0.630307	0.625392	Higher expr.	0
DLBC	ITGA2	OS	0.417536	0.241282	0.227861	Lower expr.	0
DLBC	ITGA2	PFS	0.515054	0.22611	0.21825	Lower expr.	0
DLBC	ITGA2	DSS	0.816583	0.839761	0.839494	Lower expr.	0
DLBC	ITGA2	DFI	0.471405	0.626692	0.622181	Lower expr.	0
DLBC	LCP1	OS	2.67521	0.228682	0.210372	Higher expr.	0
DLBC	LCP1	PFS	1.07509	0.889044	0.88902	Higher expr.	0
DLBC	LCP1	DSS	0.98292	0.986264	0.986264	Lower expr.	0
DLBC	LCP1	DFI	7.43612e-10	0.999291	0.123877	Lower expr.	0
DLBC	MMP1	OS	1.27376	0.7325	0.731877	Higher expr.	0
DLBC	MMP1	PFS	0.860345	0.776588	0.776389	Lower expr.	0
DLBC	MMP1	DSS	1.57588	0.649627	0.646823	Higher expr.	0
DLBC	MMP1	DFI	1.07522e-09	0.999357	0.235046	Lower expr.	0
DLBC	MMP10	OS	0.784055	0.742564	0.741987	Lower expr.	0
DLBC	MMP10	PFS	1.26892	0.654783	0.654107	Higher expr.	0
DLBC	MMP10	DSS	1.07525	0.942274	0.942261	Higher expr.	0
DLBC	MMP10	DFI	1.20297	0.885221	0.885095	Higher expr.	0
DLBC	MMP12	OS	0.773887	0.722514	0.721849	Lower expr.	0
DLBC	MMP12	PFS	0.658046	0.429837	0.426859	Lower expr.	0
DLBC	MMP12	DSS	0.792649	0.816574	0.816173	Lower expr.	0
DLBC	MMP12	DFI	0.272718	0.300829	0.27275	Lower expr.	0
DLBC	MMP13	OS	0.322531	0.167337	0.145993	Lower expr.	0
DLBC	MMP13	PFS	0.298657	0.0415425	0.0313265	Lower expr.	0
DLBC	MMP13	DSS	0.372217	0.393206	0.374304	Lower expr.	0
DLBC	MMP13	DFI	0.762685	0.830267	0.829832	Lower expr.	0
DLBC	MMP14	OS	0.425513	0.25229	0.23943	Lower expr.	0
DLBC	MMP14	PFS	0.245088	0.0183515	0.0112977	Lower expr.	0
DLBC	MMP14	DSS	0.307814	0.30766	0.280105	Lower expr.	0
DLBC	MMP14	DFI	0.272718	0.300829	0.27275	Lower expr.	0
DLBC	MMP2	OS	0.567148	0.438565	0.432523	Lower expr.	0
DLBC	MMP2	PFS	0.312759	0.0489026	0.0379576	Lower expr.	0
DLBC	MMP2	DSS	0.336162	0.345507	0.321935	Lower expr.	0
DLBC	MMP2	DFI	0.258213	0.277313	0.245404	Lower expr.	0
DLBC	MMP3	OS	0.648197	0.554885	0.551883	Lower expr.	0
DLBC	MMP3	PFS	0.71218	0.526254	0.524427	Lower expr.	0
DLBC	MMP3	DSS	1.265	0.814409	0.813992	Higher expr.	0
DLBC	MMP3	DFI	0.322808	0.36996	0.34889	Lower expr.	0
DLBC	MMP9	OS	0.110338	0.0418076	0.0138045	Lower expr.	0
DLBC	MMP9	PFS	0.101374	0.0034869	0.000429664	Lower expr.	0
DLBC	MMP9	DSS	4.33374e-10	0.999163	0.0197446	Lower expr.	0
DLBC	MMP9	DFI	0.303822	0.409765	0.385022	Lower expr.	0
DLBC	PECAM1	OS	0.484762	0.322642	0.312279	Lower expr.	0
DLBC	PECAM1	PFS	0.412203	0.106133	0.0951673	Lower expr.	0
DLBC	PECAM1	DSS	0.253795	0.235539	0.200337	Lower expr.	0
DLBC	PECAM1	DFI	1.93178	0.590942	0.58423	Higher expr.	0
DLBC	SERPINE1	OS	0.698715	0.639489	0.637716	Lower expr.	0
DLBC	SERPINE1	PFS	0.540499	0.284763	0.277565	Lower expr.	0
DLBC	SERPINE1	DSS	0.366743	0.385941	0.366351	Lower expr.	0
DLBC	SERPINE1	DFI	4.29912e-10	0.999411	0.111067	Lower expr.	0
DLBC	SPP1	OS	0.460736	0.300889	0.29025	Lower expr.	0
DLBC	SPP1	PFS	0.365027	0.0731155	0.0631498	Lower expr.	0
DLBC	SPP1	DSS	0.336162	0.345507	0.321935	Lower expr.	0
DLBC	SPP1	DFI	1.29129	0.841225	0.840897	Higher expr.	0
DLBC	TIMP2	OS	0.551306	0.415919	0.409129	Lower expr.	0
DLBC	TIMP2	PFS	0.420447	0.117376	0.106821	Lower expr.	0
DLBC	TIMP2	DSS	0.839848	0.861755	0.861583	Lower expr.	0
DLBC	TIMP2	DFI	1.18535	0.892666	0.892558	Higher expr.	0
DLBC	TNF	OS	1.17621	0.822725	0.822553	Higher expr.	0
DLBC	TNF	PFS	1.40201	0.524979	0.523257	Higher expr.	0
DLBC	TNF	DSS	0.93002	0.942274	0.942261	Lower expr.	0
DLBC	TNF	DFI	4.38851	0.230172	0.190925	Higher expr.	0
DLBC	TNFRSF11B	OS	0.496886	0.339428	0.329769	Lower expr.	0
DLBC	TNFRSF11B	PFS	0.655262	0.417353	0.414009	Lower expr.	0
DLBC	TNFRSF11B	DSS	0.257113	0.239775	0.204938	Lower expr.	0
DLBC	TNFRSF11B	DFI	1.00674	0.995671	0.995671	Higher expr.	0
ESCA	FGF2	OS	0.975737	0.914258	0.912952	Lower expr.	0
ESCA	FGF2	PFS	0.830467	0.324874	0.323917	Lower expr.	0
ESCA	FGF2	DSS	1.36546	0.271856	0.270013	Higher expr.	0
ESCA	FGF2	DFI	0.770149	0.532569	0.531421	Lower expr.	0
ESCA	ICAM1	OS	1.20823	0.405244	0.404573	Higher expr.	0
ESCA	ICAM1	PFS	0.929067	0.695004	0.696148	Lower expr.	0
ESCA	ICAM1	DSS	1.53668	0.126763	0.123612	Higher expr.	0
ESCA	ICAM1	DFI	0.914736	0.833179	0.833126	Lower expr.	0
ESCA	ICAM3	OS	0.846926	0.472539	0.471764	Lower expr.	0
ESCA	ICAM3	PFS	0.695552	0.0564367	0.0553465	Lower expr.	0
ESCA	ICAM3	DSS	0.836672	0.5276	0.527678	Lower expr.	0
ESCA	ICAM3	DFI	0.652748	0.333954	0.330479	Lower expr.	0
ESCA	ITGA2	OS	0.899004	0.647267	0.647811	Lower expr.	0
ESCA	ITGA2	PFS	1.06851	0.7268	0.725653	Higher expr.	0
ESCA	ITGA2	DSS	0.882495	0.661277	0.661073	Lower expr.	0
ESCA	ITGA2	DFI	0.790278	0.578015	0.577167	Lower expr.	0
ESCA	LCP1	OS	1.26156	0.308529	0.308177	Higher expr.	0
ESCA	LCP1	PFS	1.1615	0.426773	0.425606	Higher expr.	0
ESCA	LCP1	DSS	1.5781	0.10572	0.102835	Higher expr.	0
ESCA	LCP1	DFI	1.88106	0.138945	0.132968	Higher expr.	0
ESCA	MMP1	OS	0.857382	0.500579	0.500565	Lower expr.	0
ESCA	MMP1	PFS	0.797987	0.231841	0.230288	Lower expr.	0
ESCA	MMP1	DSS	0.95033	0.855057	0.855076	Lower expr.	0
ESCA	MMP1	DFI	0.544216	0.148515	0.142367	Lower expr.	0
ESCA	MMP10	OS	1.33826	0.206608	0.205312	Higher expr.	0
ESCA	MMP10	PFS	1.09625	0.628368	0.63005	Higher expr.	0
ESCA	MMP10	DSS	1.38421	0.246666	0.244667	Higher expr.	0
ESCA	MMP10	DFI	0.635441	0.2808	0.276865	Lower expr.	0
ESCA	MMP12	OS	1.57017	0.0523213	0.0505064	Higher expr.	0
ESCA	MMP12	PFS	1.59647	0.0146467	0.0138606	Higher expr.	0
ESCA	MMP12	DSS	1.85039	0.0312137	0.0288604	Higher expr.	0
ESCA	MMP12	DFI	1.48329	0.355234	0.352349	Higher expr.	0
ESCA	MMP13	OS	0.917541	0.720753	0.721259	Lower expr.	0
ESCA	MMP13	PFS	1.10153	0.613071	0.612484	Higher expr.	0
ESCA	MMP13	DSS	1.03792	0.897665	0.897612	Higher expr.	0
ESCA	MMP13	DFI	1.88183	0.191823	0.18536	Higher expr.	0
ESCA	MMP14	OS	0.981226	0.936411	0.937042	Lower expr.	0
ESCA	MMP14	PFS	1.10835	0.593095	0.591678	Higher expr.	0
ESCA	MMP14	DSS	1.40699	0.236141	0.234117	Higher expr.	0
ESCA	MMP14	DFI	1.50728	0.3701	0.36695	Higher expr.	0
ESCA	MMP2	OS	0.818508	0.39974	0.399393	Lower expr.	0
ESCA	MMP2	PFS	0.956686	0.817434	0.818499	Lower expr.	0
ESCA	MMP2	DSS	1.33826	0.326831	0.325205	Higher expr.	0
ESCA	MMP2	DFI	1.73887	0.248248	0.242567	Higher expr.	0
ESCA	MMP3	OS	0.961781	0.8639	0.864343	Lower expr.	0
ESCA	MMP3	PFS	0.86062	0.426199	0.424354	Lower expr.	0
ESCA	MMP3	DSS	0.969927	0.912515	0.9125	Lower expr.	0
ESCA	MMP3	DFI	0.456977	0.0740004	0.0669123	Lower expr.	0
ESCA	MMP9	OS	1.14111	0.561737	0.562043	Higher expr.	0
ESCA	MMP9	PFS	1.16186	0.425125	0.423625	Higher expr.	0
ESCA	MMP9	DSS	1.23343	0.451733	0.450285	Higher expr.	0
ESCA	MMP9	DFI	1.68171	0.227247	0.222269	Higher expr.	0
ESCA	PECAM1	OS	1.12662	0.603446	0.604267	Higher expr.	0
ESCA	PECAM1	PFS	0.900447	0.577779	0.577002	Lower expr.	0
ESCA	PECAM1	DSS	1.19558	0.523337	0.522737	Higher expr.	0
ESCA	PECAM1	DFI	1.14432	0.747425	0.747244	Higher expr.	0
ESCA	SERPINE1	OS	0.860437	0.517327	0.517785	Lower expr.	0
ESCA	SERPINE1	PFS	0.842075	0.365339	0.366252	Lower expr.	0
ESCA	SERPINE1	DSS	0.956824	0.878814	0.879595	Lower expr.	0
ESCA	SERPINE1	DFI	1.43449	0.430809	0.428902	Higher expr.	0
ESCA	SPP1	OS	1.21769	0.410598	0.409427	Higher expr.	0
ESCA	SPP1	PFS	1.77702	0.0030832	0.00273112	Higher expr.	0
ESCA	SPP1	DSS	1.49392	0.165557	0.162931	Higher expr.	0
ESCA	SPP1	DFI	4.26225	0.00583361	0.00321496	Higher expr.	0
ESCA	TIMP2	OS	0.737803	0.187515	0.185745	Lower expr.	0
ESCA	TIMP2	PFS	0.822305	0.300096	0.30065	Lower expr.	0
ESCA	TIMP2	DSS	0.98854	0.96734	0.968197	Lower expr.	0
ESCA	TIMP2	DFI	1.57042	0.322452	0.318513	Higher expr.	0
ESCA	TNF	OS	1.03405	0.882698	0.883346	Higher expr.	0
ESCA	TNF	PFS	0.988081	0.949085	0.94728	Lower expr.	0
ESCA	TNF	DSS	1.25172	0.420462	0.419418	Higher expr.	0
ESCA	TNF	DFI	0.720471	0.444279	0.442276	Lower expr.	0
ESCA	TNFRSF11B	OS	0.79323	0.335387	0.334228	Lower expr.	0
ESCA	TNFRSF11B	PFS	0.662445	0.0338207	0.0329281	Lower expr.	0
ESCA	TNFRSF11B	DSS	0.862872	0.619155	0.619589	Lower expr.	0
ESCA	TNFRSF11B	DFI	0.352993	0.0335048	0.0274199	Lower expr.	0
GBM	FGF2	OS	0.901332	0.551239	0.560333	Lower expr.	0
GBM	FGF2	PFS	0.864832	0.387018	0.383012	Lower expr.	0
GBM	FGF2	DSS	0.855422	0.398585	0.406926	Lower expr.	0
GBM	ICAM1	OS	1.39175	0.059217	0.0593133	Higher expr.	0
GBM	ICAM1	PFS	1.47483	0.01988	0.0194874	Higher expr.	0
GBM	ICAM1	DSS	1.32137	0.134246	0.135999	Higher expr.	0
GBM	ICAM3	OS	1.30575	0.124323	0.125584	Higher expr.	0
GBM	ICAM3	PFS	1.23712	0.201011	0.200797	Higher expr.	0
GBM	ICAM3	DSS	1.27547	0.18639	0.188302	Higher expr.	0
GBM	ITGA2	OS	1.10173	0.57986	0.591792	Higher expr.	0
GBM	ITGA2	PFS	1.08039	0.641774	0.653655	Higher expr.	0
GBM	ITGA2	DSS	1.1617	0.423027	0.431174	Higher expr.	0
GBM	LCP1	OS	0.976338	0.891318	0.890638	Lower expr.	0
GBM	LCP1	PFS	1.26052	0.164254	0.16402	Higher expr.	0
GBM	LCP1	DSS	1.00267	0.988561	0.989979	Higher expr.	0
GBM	MMP1	OS	1.31698	0.121086	0.124699	Higher expr.	0
GBM	MMP1	PFS	1.39722	0.0460954	0.0453531	Higher expr.	0
GBM	MMP1	DSS	1.37824	0.0899212	0.0927904	Higher expr.	0
GBM	MMP10	OS	1.31936	0.112063	0.111387	Higher expr.	0
GBM	MMP10	PFS	1.43498	0.0328096	0.0331506	Higher expr.	0
GBM	MMP10	DSS	1.35332	0.102005	0.101125	Higher expr.	0
GBM	MMP12	OS	0.988753	0.948045	0.930608	Lower expr.	0
GBM	MMP12	PFS	1.16856	0.353624	0.357925	Higher expr.	0
GBM	MMP12	DSS	1.08969	0.64095	0.65741	Higher expr.	0
GBM	MMP13	OS	1.50562	0.0223308	0.0228548	Higher expr.	0
GBM	MMP13	PFS	1.37565	0.0586779	0.0586701	Higher expr.	0
GBM	MMP13	DSS	1.73853	0.0038059	0.00371518	Higher expr.	0
GBM	MMP14	OS	1.32865	0.104048	0.104829	Higher expr.	0
GBM	MMP14	PFS	1.32475	0.0911308	0.0927799	Higher expr.	0
GBM	MMP14	DSS	1.28872	0.170734	0.172523	Higher expr.	0
GBM	MMP2	OS	1.34004	0.0955751	0.0979625	Higher expr.	0
GBM	MMP2	PFS	1.18485	0.306489	0.310312	Higher expr.	0
GBM	MMP2	DSS	1.41864	0.0616807	0.0629098	Higher expr.	0
GBM	MMP3	OS	0.899984	0.54393	0.543362	Lower expr.	0
GBM	MMP3	PFS	1.16385	0.361313	0.364714	Higher expr.	0
GBM	MMP3	DSS	0.83487	0.327604	0.325072	Lower expr.	0
GBM	MMP9	OS	1.32886	0.106819	0.106741	Higher expr.	0
GBM	MMP9	PFS	1.4345	0.0322577	0.0317598	Higher expr.	0
GBM	MMP9	DSS	1.33495	0.121716	0.121568	Higher expr.	0
GBM	PECAM1	OS	1.3103	0.128418	0.124189	Higher expr.	0
GBM	PECAM1	PFS	1.26184	0.166652	0.163088	Higher expr.	0
GBM	PECAM1	DSS	1.37608	0.0907842	0.086659	Higher expr.	0
GBM	SERPINE1	OS	1.27637	0.164971	0.169661	Higher expr.	0
GBM	SERPINE1	PFS	1.38973	0.0487465	0.049189	Higher expr.	0
GBM	SERPINE1	DSS	1.23051	0.266681	0.274724	Higher expr.	0
GBM	SPP1	OS	1.35717	0.079658	0.0763744	Higher expr.	0
GBM	SPP1	PFS	1.70815	0.00143161	0.00124665	Higher expr.	0
GBM	SPP1	DSS	1.33074	0.122666	0.118445	Higher expr.	0
GBM	TIMP2	OS	1.11091	0.54766	0.554202	Higher expr.	0
GBM	TIMP2	PFS	1.02416	0.886691	0.891411	Higher expr.	0
GBM	TIMP2	DSS	1.12636	0.522384	0.528888	Higher expr.	0
GBM	TNF	OS	0.953864	0.787304	0.805308	Lower expr.	0
GBM	TNF	PFS	0.973338	0.870718	0.87645	Lower expr.	0
GBM	TNF	DSS	0.946733	0.769034	0.788073	Lower expr.	0
GBM	TNFRSF11B	OS	1.34167	0.0913558	0.0879521	Higher expr.	0
GBM	TNFRSF11B	PFS	1.38313	0.0518754	0.0499541	Higher expr.	0
GBM	TNFRSF11B	DSS	1.35381	0.10092	0.0965117	Higher expr.	0
HNSC	FGF2	OS	0.982961	0.898856	0.898645	Lower expr.	0
HNSC	FGF2	PFS	0.928871	0.544404	0.544021	Lower expr.	0
HNSC	FGF2	DSS	0.849785	0.355452	0.355	Lower expr.	0
HNSC	FGF2	DFI	1.19118	0.644178	0.64376	Higher expr.	0
HNSC	ICAM1	OS	1.00441	0.974015	0.973474	Higher expr.	0
HNSC	ICAM1	PFS	0.968283	0.791163	0.791383	Lower expr.	0
HNSC	ICAM1	DSS	1.06312	0.727741	0.727145	Higher expr.	0
HNSC	ICAM1	DFI	1.47827	0.313789	0.310763	Higher expr.	0
HNSC	ICAM3	OS	0.53757	9.03853e-06	6.49839e-06	Lower expr.	0
HNSC	ICAM3	PFS	0.583126	1.4363e-05	1.1331e-05	Lower expr.	0
HNSC	ICAM3	DSS	0.502006	0.00012806	9.4048e-05	Lower expr.	0
HNSC	ICAM3	DFI	1.3459	0.458189	0.456645	Higher expr.	0
HNSC	ITGA2	OS	1.18357	0.217245	0.216408	Higher expr.	0
HNSC	ITGA2	PFS	1.09152	0.473368	0.473352	Higher expr.	0
HNSC	ITGA2	DSS	1.22549	0.251978	0.250958	Higher expr.	0
HNSC	ITGA2	DFI	0.728253	0.417764	0.415918	Lower expr.	0
HNSC	LCP1	OS	0.874873	0.323055	0.323043	Lower expr.	0
HNSC	LCP1	PFS	0.871101	0.257313	0.256864	Lower expr.	0
HNSC	LCP1	DSS	0.836334	0.310675	0.310733	Lower expr.	0
HNSC	LCP1	DFI	1.45171	0.347461	0.344757	Higher expr.	0
HNSC	MMP1	OS	1.16766	0.251453	0.250657	Higher expr.	0
HNSC	MMP1	PFS	1.15557	0.235027	0.234717	Higher expr.	0
HNSC	MMP1	DSS	1.14069	0.453744	0.452871	Higher expr.	0
HNSC	MMP1	DFI	1.18544	0.660695	0.660315	Higher expr.	0
HNSC	MMP10	OS	1.24408	0.107155	0.106406	Higher expr.	0
HNSC	MMP10	PFS	1.1854	0.16321	0.162884	Higher expr.	0
HNSC	MMP10	DSS	1.22027	0.258314	0.257643	Higher expr.	0
HNSC	MMP10	DFI	0.844913	0.657462	0.657088	Lower expr.	0
HNSC	MMP12	OS	1.05193	0.708694	0.708457	Higher expr.	0
HNSC	MMP12	PFS	1.05327	0.670351	0.670074	Higher expr.	0
HNSC	MMP12	DSS	0.985697	0.934592	0.935407	Lower expr.	0
HNSC	MMP12	DFI	1.55893	0.263472	0.259685	Higher expr.	0
HNSC	MMP13	OS	1.20967	0.161874	0.161175	Higher expr.	0
HNSC	MMP13	PFS	1.10396	0.418077	0.418068	Higher expr.	0
HNSC	MMP13	DSS	1.43899	0.0410867	0.0399629	Higher expr.	0
HNSC	MMP13	DFI	1.05213	0.894357	0.894346	Higher expr.	0
HNSC	MMP14	OS	1.24752	0.10376	0.102903	Higher expr.	0
HNSC	MMP14	PFS	1.12196	0.344751	0.34458	Higher expr.	0
HNSC	MMP14	DSS	1.32721	0.109579	0.108215	Higher expr.	0
HNSC	MMP14	DFI	1.23058	0.584997	0.584334	Higher expr.	0
HNSC	MMP2	OS	1.10127	0.476553	0.476287	Higher expr.	0
HNSC	MMP2	PFS	1.02558	0.835788	0.836121	Higher expr.	0
HNSC	MMP2	DSS	1.09175	0.617141	0.616937	Higher expr.	0
HNSC	MMP2	DFI	1.24374	0.569514	0.568767	Higher expr.	0
HNSC	MMP3	OS	1.10345	0.466283	0.465515	Higher expr.	0
HNSC	MMP3	PFS	1.01324	0.913909	0.913429	Higher expr.	0
HNSC	MMP3	DSS	1.08034	0.660029	0.659316	Higher expr.	0
HNSC	MMP3	DFI	0.936782	0.864395	0.864371	Lower expr.	0
HNSC	MMP9	OS	0.986254	0.918526	0.918115	Lower expr.	0
HNSC	MMP9	PFS	0.953355	0.695186	0.695206	Lower expr.	0
HNSC	MMP9	DSS	0.921085	0.639808	0.639466	Lower expr.	0
HNSC	MMP9	DFI	1.89115	0.107435	0.101708	Higher expr.	0
HNSC	PECAM1	OS	0.896568	0.420272	0.419776	Lower expr.	0
HNSC	PECAM1	PFS	0.870559	0.256282	0.255661	Lower expr.	0
HNSC	PECAM1	DSS	0.903666	0.564186	0.563849	Lower expr.	0
HNSC	PECAM1	DFI	1.34415	0.439544	0.437896	Higher expr.	0
HNSC	SERPINE1	OS	1.57477	0.000942849	0.000848946	Higher expr.	0
HNSC	SERPINE1	PFS	1.46614	0.00187261	0.00175598	Higher expr.	0
HNSC	SERPINE1	DSS	1.6897	0.00333151	0.00298356	Higher expr.	0
HNSC	SERPINE1	DFI	0.989062	0.97695	0.97695	Lower expr.	0
HNSC	SPP1	OS	1.33621	0.032999	0.0323783	Higher expr.	0
HNSC	SPP1	PFS	1.30946	0.0275994	0.0271278	Higher expr.	0
HNSC	SPP1	DSS	1.4061	0.0545427	0.0533157	Higher expr.	0
HNSC	SPP1	DFI	2.00245	0.0685807	0.0633231	Higher expr.	0
HNSC	TIMP2	OS	1.05823	0.676115	0.675948	Higher expr.	0
HNSC	TIMP2	PFS	0.960228	0.739085	0.738384	Lower expr.	0
HNSC	TIMP2	DSS	1.14782	0.433858	0.433167	Higher expr.	0
HNSC	TIMP2	DFI	1.05479	0.889254	0.889242	Higher expr.	0
HNSC	TNF	OS	0.824337	0.154181	0.153567	Lower expr.	0
HNSC	TNF	PFS	0.825347	0.115501	0.115015	Lower expr.	0
HNSC	TNF	DSS	0.758222	0.117929	0.116711	Lower expr.	0
HNSC	TNF	DFI	1.18387	0.687531	0.687184	Higher expr.	0
HNSC	TNFRSF11B	OS	0.731437	0.0214759	0.0209278	Lower expr.	0
HNSC	TNFRSF11B	PFS	0.678314	0.0015848	0.00148233	Lower expr.	0
HNSC	TNFRSF11B	DSS	0.714788	0.0571835	0.0560412	Lower expr.	0
HNSC	TNFRSF11B	DFI	0.785111	0.525075	0.524096	Lower expr.	0
KICH	FGF2	OS	1.46879	0.566827	0.564446	Higher expr.	0
KICH	FGF2	PFS	1.06403	0.914409	0.914396	Higher expr.	0
KICH	FGF2	DSS	0.903924	0.894827	0.894782	Lower expr.	0
KICH	FGF2	DFI	0.477922	0.546803	0.537699	Lower expr.	0
KICH	ICAM1	OS	0.619609	0.498743	0.494659	Lower expr.	0
KICH	ICAM1	PFS	0.832788	0.754784	0.754454	Lower expr.	0
KICH	ICAM1	DSS	0.49639	0.402819	0.393253	Lower expr.	0
KICH	ICAM1	DFI	2.27775	0.501998	0.489992	Higher expr.	0
KICH	ICAM3	OS	0.8554	0.816057	0.815874	Lower expr.	0
KICH	ICAM3	PFS	0.726288	0.585511	0.583927	Lower expr.	0
KICH	ICAM3	DSS	0.793213	0.761886	0.761372	Lower expr.	0
KICH	ICAM3	DFI	0.504339	0.576867	0.569486	Lower expr.	0
KICH	ITGA2	OS	0.910499	0.889045	0.889005	Lower expr.	0
KICH	ITGA2	PFS	0.778277	0.669769	0.668973	Lower expr.	0
KICH	ITGA2	DSS	0.886198	0.874514	0.874439	Lower expr.	0
KICH	ITGA2	DFI	0.534954	0.610766	0.60506	Lower expr.	0
KICH	LCP1	OS	0.597223	0.46618	0.461253	Lower expr.	0
KICH	LCP1	PFS	0.821777	0.737568	0.737163	Lower expr.	0
KICH	LCP1	DSS	0.880537	0.867788	0.8677	Lower expr.	0
KICH	LCP1	DFI	1.57437	0.71117	0.708809	Higher expr.	0
KICH	MMP1	OS	9.67976	0.0324967	0.00870773	Higher expr.	0
KICH	MMP1	PFS	6.44795	0.0163256	0.00580262	Higher expr.	0
KICH	MMP1	DSS	7.49933	0.062417	0.0284064	Higher expr.	0
KICH	MMP1	DFI	1.57437	0.71117	0.708809	Higher expr.	0
KICH	MMP10	OS	4.1076	0.0791082	0.0571887	Higher expr.	0
KICH	MMP10	PFS	3.96754	0.0400772	0.0270052	Higher expr.	0
KICH	MMP10	DSS	7.31317	0.0662447	0.0317878	Higher expr.	0
KICH	MMP10	DFI	2.50127	0.455492	0.440007	Higher expr.	0
KICH	MMP12	OS	1.09721	0.890111	0.890072	Higher expr.	0
KICH	MMP12	PFS	0.909937	0.870426	0.870379	Lower expr.	0
KICH	MMP12	DSS	1.14972	0.855209	0.855094	Higher expr.	0
KICH	MMP12	DFI	0.439029	0.501998	0.489992	Lower expr.	0
KICH	MMP13	OS	2.20393	0.264228	0.251984	Higher expr.	0
KICH	MMP13	PFS	1.0552	0.925891	0.925882	Higher expr.	0
KICH	MMP13	DSS	1.52289	0.582122	0.57935	Higher expr.	0
KICH	MMP13	DFI	6.19761e-10	0.999272	0.0844001	Lower expr.	0
KICH	MMP14	OS	0.278336	0.110755	0.0880836	Lower expr.	0
KICH	MMP14	PFS	0.476123	0.225825	0.215318	Lower expr.	0
KICH	MMP14	DSS	0.379686	0.247123	0.228939	Lower expr.	0
KICH	MMP14	DFI	2.73738	0.413348	0.394305	Higher expr.	0
KICH	MMP2	OS	0.563548	0.417563	0.411203	Lower expr.	0
KICH	MMP2	PFS	0.756603	0.634103	0.633009	Lower expr.	0
KICH	MMP2	DSS	0.45267	0.343727	0.331189	Lower expr.	0
KICH	MMP2	DFI	1.81087	0.62799	0.622944	Higher expr.	0
KICH	MMP3	OS	5.47823	0.0163925	0.00701229	Higher expr.	0
KICH	MMP3	PFS	2.88427	0.0670741	0.0552162	Higher expr.	0
KICH	MMP3	DSS	3.7962	0.0813909	0.0610292	Higher expr.	0
KICH	MMP3	DFI	3.77697e-09	0.999142	0.367215	Lower expr.	0
KICH	MMP9	OS	1.67908	0.464049	0.459076	Higher expr.	0
KICH	MMP9	PFS	1.30438	0.650163	0.649205	Higher expr.	0
KICH	MMP9	DSS	2.03489	0.396144	0.386268	Higher expr.	0
KICH	MMP9	DFI	0.347226	0.388832	0.367124	Lower expr.	0
KICH	PECAM1	OS	0.95336	0.943314	0.943309	Lower expr.	0
KICH	PECAM1	PFS	1.12135	0.84304	0.842956	Higher expr.	0
KICH	PECAM1	DSS	0.885026	0.87313	0.873052	Lower expr.	0
KICH	PECAM1	DFI	2.02755	0.564514	0.556472	Higher expr.	0
KICH	SERPINE1	OS	2.2121	0.262243	0.249938	Higher expr.	0
KICH	SERPINE1	PFS	2.43691	0.14653	0.133663	Higher expr.	0
KICH	SERPINE1	DSS	2.79334	0.220335	0.200683	Higher expr.	0
KICH	SERPINE1	DFI	3.18446	0.34675	0.320913	Higher expr.	0
KICH	SPP1	OS	0.899331	0.874528	0.87447	Lower expr.	0
KICH	SPP1	PFS	1.56945	0.441791	0.437945	Higher expr.	0
KICH	SPP1	DSS	0.871366	0.85712	0.857009	Lower expr.	0
KICH	SPP1	DFI	1.99734e+09	0.999271	0.0585703	Higher expr.	0
KICH	TIMP2	OS	1.28449	0.70911	0.708386	Higher expr.	0
KICH	TIMP2	PFS	1.05365	0.927912	0.927904	Higher expr.	0
KICH	TIMP2	DSS	1.35386	0.691757	0.690641	Higher expr.	0
KICH	TIMP2	DFI	0.451932	0.516913	0.505912	Lower expr.	0
KICH	TNF	OS	1.54678	0.51595	0.51264	Higher expr.	0
KICH	TNF	PFS	1.21138	0.740101	0.73972	Higher expr.	0
KICH	TNF	DSS	1.66892	0.502932	0.498291	Higher expr.	0
KICH	TNF	DFI	0.451932	0.516913	0.505912	Lower expr.	0
KICH	TNFRSF11B	OS	0.694359	0.586972	0.584909	Lower expr.	0
KICH	TNFRSF11B	PFS	0.440952	0.18219	0.170354	Lower expr.	0
KICH	TNFRSF11B	DSS	0.346083	0.205291	0.184718	Lower expr.	0
KICH	TNFRSF11B	DFI	3.21579e-10	0.999296	0.0249866	Lower expr.	0
KIRC	FGF2	OS	1.15023	0.35558	0.354908	Higher expr.	0
KIRC	FGF2	PFS	1.32342	0.0380531	0.0373545	Higher expr.	0
KIRC	FGF2	DSS	1.02674	0.890645	0.890286	Higher expr.	0
KIRC	FGF2	DFI	1.86115	0.242	0.234791	Higher expr.	0
KIRC	ICAM1	OS	1.6327	0.00165537	0.00148975	Higher expr.	0
KIRC	ICAM1	PFS	1.58808	0.000735066	0.000658309	Higher expr.	0
KIRC	ICAM1	DSS	1.94467	0.000948445	0.000764042	Higher expr.	0
KIRC	ICAM1	DFI	2.05306	0.197715	0.188232	Higher expr.	0
KIRC	ICAM3	OS	1.5836	0.00332783	0.00306605	Higher expr.	0
KIRC	ICAM3	PFS	1.49312	0.00332699	0.00311552	Higher expr.	0
KIRC	ICAM3	DSS	2.09295	0.000357582	0.000261496	Higher expr.	0
KIRC	ICAM3	DFI	1.02421	0.963158	0.963157	Higher expr.	0
KIRC	ITGA2	OS	0.574151	0.00037816	0.000317453	Lower expr.	0
KIRC	ITGA2	PFS	0.692516	0.00681706	0.00650215	Lower expr.	0
KIRC	ITGA2	DSS	0.529581	0.00138718	0.00114964	Lower expr.	0
KIRC	ITGA2	DFI	1.42664	0.519659	0.517521	Higher expr.	0
KIRC	LCP1	OS	1.26553	0.123308	0.122624	Higher expr.	0
KIRC	LCP1	PFS	1.13094	0.360699	0.35987	Higher expr.	0
KIRC	LCP1	DSS	1.40424	0.0821019	0.0807728	Higher expr.	0
KIRC	LCP1	DFI	0.624514	0.381746	0.377702	Lower expr.	0
KIRC	MMP1	OS	1.3888	0.0318915	0.0311769	Higher expr.	0
KIRC	MMP1	PFS	1.36235	0.0218512	0.0213679	Higher expr.	0
KIRC	MMP1	DSS	1.52216	0.0314574	0.0302833	Higher expr.	0
KIRC	MMP1	DFI	1.07341	0.891278	0.891256	Higher expr.	0
KIRC	MMP10	OS	1.26735	0.1205	0.119647	Higher expr.	0
KIRC	MMP10	PFS	1.31537	0.0427433	0.0420451	Higher expr.	0
KIRC	MMP10	DSS	1.23709	0.269383	0.268605	Higher expr.	0
KIRC	MMP10	DFI	1.93293	0.213973	0.206041	Higher expr.	0
KIRC	MMP12	OS	1.55665	0.00426022	0.00396958	Higher expr.	0
KIRC	MMP12	PFS	1.47535	0.00423273	0.00400265	Higher expr.	0
KIRC	MMP12	DSS	2.14274	0.000258147	0.000182016	Higher expr.	0
KIRC	MMP12	DFI	1.07625	0.887532	0.887507	Higher expr.	0
KIRC	MMP13	OS	1.4199	0.0217234	0.0210979	Higher expr.	0
KIRC	MMP13	PFS	1.37973	0.0171409	0.0166293	Higher expr.	0
KIRC	MMP13	DSS	1.64826	0.0108495	0.0100634	Higher expr.	0
KIRC	MMP13	DFI	1.87992	0.223922	0.216421	Higher expr.	0
KIRC	MMP14	OS	1.77172	0.000212558	0.000175018	Higher expr.	0
KIRC	MMP14	PFS	1.73297	5.322e-05	4.3048e-05	Higher expr.	0
KIRC	MMP14	DSS	2.37807	2.1968e-05	1.2128e-05	Higher expr.	0
KIRC	MMP14	DFI	3.56384	0.021052	0.0139057	Higher expr.	0
KIRC	MMP2	OS	1.05612	0.71855	0.718743	Higher expr.	0
KIRC	MMP2	PFS	1.17354	0.234005	0.233395	Higher expr.	0
KIRC	MMP2	DSS	1.11952	0.556375	0.556432	Higher expr.	0
KIRC	MMP2	DFI	1.69681	0.312504	0.307237	Higher expr.	0
KIRC	MMP3	OS	2.56047	1.13506e-08	3.21721e-09	Higher expr.	0
KIRC	MMP3	PFS	1.87298	5.77103e-06	4.01877e-06	Higher expr.	0
KIRC	MMP3	DSS	2.7891	1.08778e-06	3.57203e-07	Higher expr.	0
KIRC	MMP3	DFI	0.112152	0.0360393	0.0121624	Lower expr.	0
KIRC	MMP9	OS	1.76208	0.000282949	0.000235878	Higher expr.	0
KIRC	MMP9	PFS	1.66591	0.000191753	0.000163389	Higher expr.	0
KIRC	MMP9	DSS	2.45457	2.0422e-05	1.0717e-05	Higher expr.	0
KIRC	MMP9	DFI	0.982342	0.973078	0.973078	Lower expr.	0
KIRC	PECAM1	OS	0.777229	0.0973419	0.0963922	Lower expr.	0
KIRC	PECAM1	PFS	0.837058	0.185622	0.185116	Lower expr.	0
KIRC	PECAM1	DSS	0.678454	0.046297	0.0449159	Lower expr.	0
KIRC	PECAM1	DFI	0.530651	0.237336	0.230053	Lower expr.	0
KIRC	SERPINE1	OS	1.48575	0.00978041	0.00933541	Higher expr.	0
KIRC	SERPINE1	PFS	1.55406	0.00116949	0.00106469	Higher expr.	0
KIRC	SERPINE1	DSS	1.70173	0.00696218	0.00634691	Higher expr.	0
KIRC	SERPINE1	DFI	1.50041	0.435249	0.432188	Higher expr.	0
KIRC	SPP1	OS	1.02024	0.894617	0.894596	Higher expr.	0
KIRC	SPP1	PFS	1.10336	0.463583	0.463335	Higher expr.	0
KIRC	SPP1	DSS	1.0365	0.851679	0.851788	Higher expr.	0
KIRC	SPP1	DFI	1.78986	0.278435	0.272169	Higher expr.	0
KIRC	TIMP2	OS	0.884683	0.420164	0.419902	Lower expr.	0
KIRC	TIMP2	PFS	0.916117	0.514979	0.514724	Lower expr.	0
KIRC	TIMP2	DSS	0.888608	0.538487	0.53847	Lower expr.	0
KIRC	TIMP2	DFI	0.716422	0.536509	0.534784	Lower expr.	0
KIRC	TNF	OS	1.08165	0.604359	0.603771	Higher expr.	0
KIRC	TNF	PFS	0.847276	0.21714	0.216506	Lower expr.	0
KIRC	TNF	DSS	1.08263	0.679103	0.678238	Higher expr.	0
KIRC	TNF	DFI	0.277133	0.0471013	0.0337422	Lower expr.	0
KIRC	TNFRSF11B	OS	0.687239	0.0139499	0.0134345	Lower expr.	0
KIRC	TNFRSF11B	PFS	0.801163	0.09865	0.0981193	Lower expr.	0
KIRC	TNFRSF11B	DSS	0.491735	0.000422082	0.000319092	Lower expr.	0
KIRC	TNFRSF11B	DFI	1.21534	0.707937	0.70751	Higher expr.	0
KIRP	FGF2	OS	0.949871	0.867218	0.867205	Lower expr.	0
KIRP	FGF2	PFS	0.958827	0.860568	0.860552	Lower expr.	0
KIRP	FGF2	DSS	0.711145	0.379964	0.377702	Lower expr.	0
KIRP	FGF2	DFI	0.766378	0.489923	0.488649	Lower expr.	0
KIRP	ICAM1	OS	1.32752	0.357154	0.355579	Higher expr.	0
KIRP	ICAM1	PFS	1.3076	0.260058	0.258837	Higher expr.	0
KIRP	ICAM1	DSS	1.21441	0.608702	0.608143	Higher expr.	0
KIRP	ICAM1	DFI	1.51187	0.271221	0.268362	Higher expr.	0
KIRP	ICAM3	OS	0.861224	0.624192	0.623874	Lower expr.	0
KIRP	ICAM3	PFS	0.858836	0.520193	0.519771	Lower expr.	0
KIRP	ICAM3	DSS	0.826672	0.619148	0.618628	Lower expr.	0
KIRP	ICAM3	DFI	0.78759	0.542676	0.541672	Lower expr.	0
KIRP	ITGA2	OS	1.7559	0.0680178	0.064567	Higher expr.	0
KIRP	ITGA2	PFS	1.03103	0.896961	0.896961	Higher expr.	0
KIRP	ITGA2	DSS	1.97138	0.0856998	0.0798728	Higher expr.	0
KIRP	ITGA2	DFI	0.867151	0.713124	0.71278	Lower expr.	0
KIRP	LCP1	OS	0.859715	0.619815	0.619483	Lower expr.	0
KIRP	LCP1	PFS	0.933163	0.768584	0.768524	Lower expr.	0
KIRP	LCP1	DSS	0.63521	0.250528	0.246508	Lower expr.	0
KIRP	LCP1	DFI	1.35015	0.422407	0.420662	Higher expr.	0
KIRP	MMP1	OS	2.70496	0.00262239	0.00172565	Higher expr.	0
KIRP	MMP1	PFS	2.49791	0.000244161	0.000146719	Higher expr.	0
KIRP	MMP1	DSS	8.71965	0.000395152	1.9075e-05	Higher expr.	0
KIRP	MMP1	DFI	3.65769	0.00286704	0.00141118	Higher expr.	0
KIRP	MMP10	OS	1.15838	0.644431	0.644136	Higher expr.	0
KIRP	MMP10	PFS	1.28001	0.314104	0.312964	Higher expr.	0
KIRP	MMP10	DSS	2.06359	0.0555049	0.0503687	Higher expr.	0
KIRP	MMP10	DFI	1.85874	0.102231	0.0973513	Higher expr.	0
KIRP	MMP12	OS	1.59765	0.127357	0.123949	Higher expr.	0
KIRP	MMP12	PFS	1.34412	0.2118	0.209993	Higher expr.	0
KIRP	MMP12	DSS	1.97907	0.0836673	0.0778239	Higher expr.	0
KIRP	MMP12	DFI	1.47451	0.302364	0.298963	Higher expr.	0
KIRP	MMP13	OS	2.11934	0.0184495	0.0158741	Higher expr.	0
KIRP	MMP13	PFS	1.71697	0.037534	0.0352731	Higher expr.	0
KIRP	MMP13	DSS	2.64771	0.0121151	0.00910777	Higher expr.	0
KIRP	MMP13	DFI	2.91299	0.00517803	0.00342485	Higher expr.	0
KIRP	MMP14	OS	1.10975	0.730971	0.730857	Higher expr.	0
KIRP	MMP14	PFS	1.26693	0.316112	0.314985	Higher expr.	0
KIRP	MMP14	DSS	1.24852	0.558348	0.557544	Higher expr.	0
KIRP	MMP14	DFI	1.15941	0.694598	0.694354	Higher expr.	0
KIRP	MMP2	OS	1.15775	0.628229	0.627927	Higher expr.	0
KIRP	MMP2	PFS	1.14542	0.565352	0.565047	Higher expr.	0
KIRP	MMP2	DSS	1.2827	0.512452	0.511381	Higher expr.	0
KIRP	MMP2	DFI	2.21333	0.0529867	0.0471386	Higher expr.	0
KIRP	MMP3	OS	1.74963	0.0712265	0.0676298	Higher expr.	0
KIRP	MMP3	PFS	1.08469	0.753381	0.753088	Higher expr.	0
KIRP	MMP3	DSS	2.16843	0.042974	0.0380319	Higher expr.	0
KIRP	MMP3	DFI	0.956792	0.919078	0.919566	Lower expr.	0
KIRP	MMP9	OS	0.960517	0.894052	0.894045	Lower expr.	0
KIRP	MMP9	PFS	0.999907	0.999688	0.999684	Lower expr.	0
KIRP	MMP9	DSS	1.13836	0.732389	0.732209	Higher expr.	0
KIRP	MMP9	DFI	1.2408	0.577753	0.576922	Higher expr.	0
KIRP	PECAM1	OS	2.06944	0.0206186	0.0180074	Higher expr.	0
KIRP	PECAM1	PFS	1.82886	0.0118037	0.0105901	Higher expr.	0
KIRP	PECAM1	DSS	2.89949	0.0111954	0.00791783	Higher expr.	0
KIRP	PECAM1	DFI	1.97589	0.0781387	0.0727616	Higher expr.	0
KIRP	SERPINE1	OS	2.09455	0.020325	0.0176496	Higher expr.	0
KIRP	SERPINE1	PFS	1.7802	0.0170717	0.0156229	Higher expr.	0
KIRP	SERPINE1	DSS	3.39122	0.00515051	0.00293674	Higher expr.	0
KIRP	SERPINE1	DFI	1.93	0.0842337	0.0790123	Higher expr.	0
KIRP	SPP1	OS	1.41241	0.263209	0.260925	Higher expr.	0
KIRP	SPP1	PFS	1.46357	0.111338	0.109238	Higher expr.	0
KIRP	SPP1	DSS	1.42833	0.351473	0.348952	Higher expr.	0
KIRP	SPP1	DFI	0.910137	0.804809	0.80464	Lower expr.	0
KIRP	TIMP2	OS	1.50293	0.180741	0.177831	Higher expr.	0
KIRP	TIMP2	PFS	0.914145	0.703406	0.70362	Lower expr.	0
KIRP	TIMP2	DSS	1.44287	0.335175	0.33253	Higher expr.	0
KIRP	TIMP2	DFI	0.947315	0.884761	0.885617	Lower expr.	0
KIRP	TNF	OS	0.764724	0.375818	0.374391	Lower expr.	0
KIRP	TNF	PFS	0.764872	0.253737	0.252301	Lower expr.	0
KIRP	TNF	DSS	0.532275	0.109995	0.104213	Lower expr.	0
KIRP	TNF	DFI	0.70309	0.346356	0.343885	Lower expr.	0
KIRP	TNFRSF11B	OS	0.982715	0.953914	0.953914	Lower expr.	0
KIRP	TNFRSF11B	PFS	1.10796	0.662208	0.661739	Higher expr.	0
KIRP	TNFRSF11B	DSS	0.774801	0.504318	0.503166	Lower expr.	0
KIRP	TNFRSF11B	DFI	0.943678	0.87894	0.879798	Lower expr.	0
LAML	FGF2	OS	1.17089	0.423603	0.406903	Higher expr.	0
LAML	ICAM1	OS	1.15748	0.456806	0.463344	Higher expr.	0
LAML	ICAM3	OS	1.41658	0.0769233	0.0746858	Higher expr.	0
LAML	ITGA2	OS	1.21281	0.32654	0.326754	Higher expr.	0
LAML	LCP1	OS	1.45933	0.0562181	0.0551552	Higher expr.	0
LAML	MMP1	OS	1.00346	0.989612	0.981767	Higher expr.	0
LAML	MMP10	OS	1.11722	0.850287	0.841746	Higher expr.	0
LAML	MMP12	OS	1.51534	0.680834	0.675487	Higher expr.	0
LAML	MMP13	OS	0.937085	0.777093	0.776226	Lower expr.	0
LAML	MMP14	OS	0.727162	0.105	0.103837	Lower expr.	0
LAML	MMP2	OS	0.715944	0.0901305	0.0876449	Lower expr.	0
LAML	MMP3	OS	1.45884	0.520137	0.522901	Higher expr.	0
LAML	MMP9	OS	0.819813	0.312619	0.303402	Lower expr.	0
LAML	PECAM1	OS	1.25427	0.247651	0.240702	Higher expr.	0
LAML	SERPINE1	OS	0.643033	0.0262508	0.0240653	Lower expr.	0
LAML	SPP1	OS	0.924561	0.688797	0.685227	Lower expr.	0
LAML	TIMP2	OS	0.762328	0.165747	0.162699	Lower expr.	0
LAML	TNF	OS	0.710661	0.0826833	0.0803519	Lower expr.	0
LAML	TNFRSF11B	OS	0.868783	0.471883	0.467788	Lower expr.	0
LGG	FGF2	OS	0.715587	0.0551161	0.0558663	Lower expr.	0
LGG	FGF2	PFS	0.79461	0.0917025	0.0939789	Lower expr.	0
LGG	FGF2	DSS	0.721693	0.0751852	0.0764461	Lower expr.	0
LGG	FGF2	DFI	0.924212	0.849142	0.859055	Lower expr.	0
LGG	ICAM1	OS	1.76375	0.001371	0.00119627	Higher expr.	0
LGG	ICAM1	PFS	1.33497	0.0334845	0.0309159	Higher expr.	0
LGG	ICAM1	DSS	1.74715	0.00266599	0.002375	Higher expr.	0
LGG	ICAM1	DFI	1.15675	0.721631	0.718788	Higher expr.	0
LGG	ICAM3	OS	1.74342	0.00195606	0.00165542	Higher expr.	0
LGG	ICAM3	PFS	1.50496	0.00285603	0.00277333	Higher expr.	0
LGG	ICAM3	DSS	1.69063	0.00510801	0.00447716	Higher expr.	0
LGG	ICAM3	DFI	0.629828	0.273727	0.272671	Lower expr.	0
LGG	ITGA2	OS	2.30386	3.34509e-06	1.74133e-06	Higher expr.	0
LGG	ITGA2	PFS	1.82216	1.5384e-05	1.1983e-05	Higher expr.	0
LGG	ITGA2	DSS	2.47186	2.27583e-06	1.02163e-06	Higher expr.	0
LGG	ITGA2	DFI	2.11442	0.0840944	0.0776813	Higher expr.	0
LGG	LCP1	OS	1.55763	0.012596	0.0118	Higher expr.	0
LGG	LCP1	PFS	1.30374	0.0529881	0.051054	Higher expr.	0
LGG	LCP1	DSS	1.57588	0.0144682	0.0135849	Higher expr.	0
LGG	LCP1	DFI	1.1623	0.713501	0.709981	Higher expr.	0
LGG	MMP1	OS	0.998178	0.99157	0.984436	Lower expr.	0
LGG	MMP1	PFS	0.948926	0.698813	0.703262	Lower expr.	0
LGG	MMP1	DSS	0.956679	0.806707	0.798461	Lower expr.	0
LGG	MMP1	DFI	0.733935	0.455811	0.453646	Lower expr.	0
LGG	MMP10	OS	1.74137	0.00168757	0.00153051	Higher expr.	0
LGG	MMP10	PFS	1.34764	0.0276858	0.0254843	Higher expr.	0
LGG	MMP10	DSS	1.86743	0.000796053	0.000682524	Higher expr.	0
LGG	MMP10	DFI	1.67779	0.205391	0.203694	Higher expr.	0
LGG	MMP12	OS	1.08039	0.66237	0.672583	Higher expr.	0
LGG	MMP12	PFS	0.992687	0.958636	0.938741	Lower expr.	0
LGG	MMP12	DSS	1.08191	0.673413	0.683937	Higher expr.	0
LGG	MMP12	DFI	1.20422	0.668815	0.659991	Higher expr.	0
LGG	MMP13	OS	1.14891	0.458962	0.472873	Higher expr.	0
LGG	MMP13	PFS	1.15835	0.325033	0.329665	Higher expr.	0
LGG	MMP13	DSS	1.10221	0.624266	0.641455	Higher expr.	0
LGG	MMP13	DFI	1.23302	0.641055	0.64724	Higher expr.	0
LGG	MMP14	OS	2.49734	4.98267e-07	2.14243e-07	Higher expr.	0
LGG	MMP14	PFS	1.62475	0.000412924	0.000359863	Higher expr.	0
LGG	MMP14	DSS	2.57192	7.63748e-07	3.20126e-07	Higher expr.	0
LGG	MMP14	DFI	0.951146	0.905575	0.917546	Lower expr.	0
LGG	MMP2	OS	1.68762	0.00486136	0.00446416	Higher expr.	0
LGG	MMP2	PFS	1.54141	0.001847	0.00173186	Higher expr.	0
LGG	MMP2	DSS	1.71701	0.00555195	0.00508374	Higher expr.	0
LGG	MMP2	DFI	1.3221	0.496144	0.491746	Higher expr.	0
LGG	MMP3	OS	1.26848	0.16703	0.161932	Higher expr.	0
LGG	MMP3	PFS	1.1781	0.225904	0.216611	Higher expr.	0
LGG	MMP3	DSS	1.25219	0.213513	0.207633	Higher expr.	0
LGG	MMP3	DFI	1.09708	0.823216	0.839515	Higher expr.	0
LGG	MMP9	OS	1.42204	0.0434942	0.0442149	Higher expr.	0
LGG	MMP9	PFS	1.18707	0.205492	0.215067	Higher expr.	0
LGG	MMP9	DSS	1.46716	0.0368233	0.0372666	Higher expr.	0
LGG	MMP9	DFI	1.06795	0.876254	0.865272	Higher expr.	0
LGG	PECAM1	OS	1.71013	0.00245065	0.00223127	Higher expr.	0
LGG	PECAM1	PFS	1.41315	0.0112477	0.0104043	Higher expr.	0
LGG	PECAM1	DSS	1.68713	0.00499955	0.00463694	Higher expr.	0
LGG	PECAM1	DFI	0.544098	0.176723	0.174092	Lower expr.	0
LGG	SERPINE1	OS	2.85976	2.58161e-08	5.66274e-09	Higher expr.	0
LGG	SERPINE1	PFS	2.038	3.12311e-07	1.57632e-07	Higher expr.	0
LGG	SERPINE1	DSS	2.89463	7.09052e-08	1.6568e-08	Higher expr.	0
LGG	SERPINE1	DFI	1.89946	0.123639	0.113792	Higher expr.	0
LGG	SPP1	OS	2.13765	2.2729e-05	1.5091e-05	Higher expr.	0
LGG	SPP1	PFS	1.81139	1.6441e-05	1.2973e-05	Higher expr.	0
LGG	SPP1	DSS	2.30999	1.1611e-05	6.75036e-06	Higher expr.	0
LGG	SPP1	DFI	1.52088	0.306295	0.299947	Higher expr.	0
LGG	TIMP2	OS	1.1627	0.383825	0.386537	Higher expr.	0
LGG	TIMP2	PFS	1.0909	0.523546	0.52231	Higher expr.	0
LGG	TIMP2	DSS	1.16441	0.402664	0.405713	Higher expr.	0
LGG	TIMP2	DFI	0.732687	0.45298	0.445498	Lower expr.	0
LGG	TNF	OS	0.828822	0.275775	0.277964	Lower expr.	0
LGG	TNF	PFS	0.83396	0.180222	0.183571	Lower expr.	0
LGG	TNF	DSS	0.833566	0.31536	0.317336	Lower expr.	0
LGG	TNF	DFI	1.18954	0.675683	0.679166	Higher expr.	0
LGG	TNFRSF11B	OS	3.55954	7.06112e-11	3.39317e-12	Higher expr.	0
LGG	TNFRSF11B	PFS	2.51718	7.0032e-11	1.14111e-11	Higher expr.	0
LGG	TNFRSF11B	DSS	3.61944	2.82506e-10	1.51934e-11	Higher expr.	0
LGG	TNFRSF11B	DFI	1.13523	0.763753	0.758942	Higher expr.	0
LIHC	FGF2	OS	0.987383	0.942404	0.941388	Lower expr.	0
LIHC	FGF2	PFS	0.95612	0.735435	0.734175	Lower expr.	0
LIHC	FGF2	DSS	0.803871	0.335336	0.333614	Lower expr.	0
LIHC	FGF2	DFI	0.862884	0.374672	0.372937	Lower expr.	0
LIHC	ICAM1	OS	1.32668	0.110151	0.109096	Higher expr.	0
LIHC	ICAM1	PFS	1.06914	0.614377	0.612488	Higher expr.	0
LIHC	ICAM1	DSS	1.23036	0.359616	0.358659	Higher expr.	0
LIHC	ICAM1	DFI	0.894806	0.50561	0.506524	Lower expr.	0
LIHC	ICAM3	OS	0.687981	0.0353519	0.0344639	Lower expr.	0
LIHC	ICAM3	PFS	0.734475	0.0203922	0.019931	Lower expr.	0
LIHC	ICAM3	DSS	0.647368	0.0568429	0.0551202	Lower expr.	0
LIHC	ICAM3	DFI	0.789889	0.155713	0.154628	Lower expr.	0
LIHC	ITGA2	OS	1.4309	0.0424036	0.0414985	Higher expr.	0
LIHC	ITGA2	PFS	1.56892	0.000795282	0.000724367	Higher expr.	0
LIHC	ITGA2	DSS	1.25044	0.321594	0.321406	Higher expr.	0
LIHC	ITGA2	DFI	1.35185	0.0690145	0.0682803	Higher expr.	0
LIHC	LCP1	OS	0.922065	0.644369	0.644741	Lower expr.	0
LIHC	LCP1	PFS	0.771249	0.0521512	0.0521535	Lower expr.	0
LIHC	LCP1	DSS	0.803576	0.334474	0.334131	Lower expr.	0
LIHC	LCP1	DFI	0.644027	0.00900387	0.00866465	Lower expr.	0
LIHC	MMP1	OS	1.79269	0.00118752	0.00101649	Higher expr.	0
LIHC	MMP1	PFS	1.65464	0.000189634	0.000165867	Higher expr.	0
LIHC	MMP1	DSS	2.27818	0.000478141	0.000331252	Higher expr.	0
LIHC	MMP1	DFI	1.67612	0.00199814	0.00181476	Higher expr.	0
LIHC	MMP10	OS	1.71153	0.00260667	0.00232635	Higher expr.	0
LIHC	MMP10	PFS	1.55099	0.00101773	0.000932633	Higher expr.	0
LIHC	MMP10	DSS	1.76096	0.0133475	0.0122151	Higher expr.	0
LIHC	MMP10	DFI	1.41208	0.0375517	0.0367007	Higher expr.	0
LIHC	MMP12	OS	1.57808	0.010162	0.00954113	Higher expr.	0
LIHC	MMP12	PFS	1.19983	0.170298	0.168699	Higher expr.	0
LIHC	MMP12	DSS	1.52149	0.0651342	0.0630328	Higher expr.	0
LIHC	MMP12	DFI	1.01613	0.923442	0.919622	Higher expr.	0
LIHC	MMP13	OS	1.87941	0.00058406	0.000474939	Higher expr.	0
LIHC	MMP13	PFS	1.3439	0.0427592	0.0417472	Higher expr.	0
LIHC	MMP13	DSS	1.88908	0.00767862	0.00675321	Higher expr.	0
LIHC	MMP13	DFI	1.25732	0.243592	0.241185	Higher expr.	0
LIHC	MMP14	OS	1.37753	0.0723495	0.0711513	Higher expr.	0
LIHC	MMP14	PFS	1.33576	0.0299975	0.0295841	Higher expr.	0
LIHC	MMP14	DSS	1.35374	0.185081	0.183178	Higher expr.	0
LIHC	MMP14	DFI	1.26225	0.16018	0.160018	Higher expr.	0
LIHC	MMP2	OS	0.95837	0.80911	0.808681	Lower expr.	0
LIHC	MMP2	PFS	0.831544	0.165269	0.166157	Lower expr.	0
LIHC	MMP2	DSS	0.836745	0.431045	0.430379	Lower expr.	0
LIHC	MMP2	DFI	0.729774	0.0609688	0.0609799	Lower expr.	0
LIHC	MMP3	OS	1.45803	0.0328422	0.0319075	Higher expr.	0
LIHC	MMP3	PFS	1.09882	0.484476	0.483882	Higher expr.	0
LIHC	MMP3	DSS	1.54339	0.0550692	0.0533546	Higher expr.	0
LIHC	MMP3	DFI	0.933433	0.689771	0.688643	Lower expr.	0
LIHC	MMP9	OS	1.60053	0.00831854	0.00773971	Higher expr.	0
LIHC	MMP9	PFS	1.13607	0.337403	0.33496	Higher expr.	0
LIHC	MMP9	DSS	1.60961	0.0367976	0.0349642	Higher expr.	0
LIHC	MMP9	DFI	0.999781	0.998948	0.996424	Lower expr.	0
LIHC	PECAM1	OS	0.758177	0.118046	0.117015	Lower expr.	0
LIHC	PECAM1	PFS	0.751694	0.0322609	0.0318558	Lower expr.	0
LIHC	PECAM1	DSS	0.8174	0.37434	0.37379	Lower expr.	0
LIHC	PECAM1	DFI	0.806785	0.196251	0.195987	Lower expr.	0
LIHC	SERPINE1	OS	1.27165	0.173304	0.172531	Higher expr.	0
LIHC	SERPINE1	PFS	1.03147	0.815266	0.816241	Higher expr.	0
LIHC	SERPINE1	DSS	1.49651	0.0778998	0.0760034	Higher expr.	0
LIHC	SERPINE1	DFI	0.897711	0.517476	0.516798	Lower expr.	0
LIHC	SPP1	OS	2.01209	0.000121942	8.958e-05	Higher expr.	0
LIHC	SPP1	PFS	1.55138	0.00103756	0.000952447	Higher expr.	0
LIHC	SPP1	DSS	1.85122	0.00749927	0.00663468	Higher expr.	0
LIHC	SPP1	DFI	1.5196	0.0118054	0.0113281	Higher expr.	0
LIHC	TIMP2	OS	0.881827	0.47695	0.476649	Lower expr.	0
LIHC	TIMP2	PFS	0.776443	0.0589624	0.0589896	Lower expr.	0
LIHC	TIMP2	DSS	0.832373	0.417254	0.416588	Lower expr.	0
LIHC	TIMP2	DFI	0.701017	0.0341132	0.0338854	Lower expr.	0
LIHC	TNF	OS	0.920458	0.638926	0.637916	Lower expr.	0
LIHC	TNF	PFS	0.776914	0.0580558	0.0575635	Lower expr.	0
LIHC	TNF	DSS	0.898346	0.635773	0.634976	Lower expr.	0
LIHC	TNF	DFI	0.691534	0.0273122	0.0266305	Lower expr.	0
LIHC	TNFRSF11B	OS	1.42419	0.0459206	0.0449195	Higher expr.	0
LIHC	TNFRSF11B	PFS	0.999874	0.999246	0.999213	Lower expr.	0
LIHC	TNFRSF11B	DSS	1.07907	0.737123	0.737422	Higher expr.	0
LIHC	TNFRSF11B	DFI	0.762537	0.108012	0.107512	Lower expr.	0
LUAD	FGF2	OS	1.07397	0.63168	0.631353	Higher expr.	0
LUAD	FGF2	PFS	1.21805	0.115675	0.115259	Higher expr.	0
LUAD	FGF2	DSS	1.12946	0.521081	0.520278	Higher expr.	0
LUAD	FGF2	DFI	0.87948	0.549902	0.549079	Lower expr.	0
LUAD	ICAM1	OS	0.918159	0.566408	0.566179	Lower expr.	0
LUAD	ICAM1	PFS	0.962393	0.75775	0.757391	Lower expr.	0
LUAD	ICAM1	DSS	0.925307	0.683313	0.682606	Lower expr.	0
LUAD	ICAM1	DFI	1.26949	0.262457	0.261698	Higher expr.	0
LUAD	ICAM3	OS	0.714253	0.0245992	0.0239055	Lower expr.	0
LUAD	ICAM3	PFS	0.776734	0.0429914	0.0425317	Lower expr.	0
LUAD	ICAM3	DSS	0.653433	0.0269555	0.0257605	Lower expr.	0
LUAD	ICAM3	DFI	0.928032	0.725352	0.724585	Lower expr.	0
LUAD	ITGA2	OS	1.16768	0.295344	0.294975	Higher expr.	0
LUAD	ITGA2	PFS	1.09254	0.476273	0.476672	Higher expr.	0
LUAD	ITGA2	DSS	1.03601	0.852501	0.852958	Higher expr.	0
LUAD	ITGA2	DFI	1.21843	0.351478	0.350367	Higher expr.	0
LUAD	LCP1	OS	0.779688	0.097083	0.0960926	Lower expr.	0
LUAD	LCP1	PFS	0.875581	0.286756	0.286331	Lower expr.	0
LUAD	LCP1	DSS	0.757826	0.147308	0.14593	Lower expr.	0
LUAD	LCP1	DFI	1.20483	0.380836	0.380398	Higher expr.	0
LUAD	MMP1	OS	1.30661	0.0719377	0.0709143	Higher expr.	0
LUAD	MMP1	PFS	1.39429	0.00766069	0.00739165	Higher expr.	0
LUAD	MMP1	DSS	1.27085	0.206164	0.204551	Higher expr.	0
LUAD	MMP1	DFI	1.40866	0.106692	0.105322	Higher expr.	0
LUAD	MMP10	OS	1.23278	0.157932	0.157161	Higher expr.	0
LUAD	MMP10	PFS	1.26058	0.0620431	0.061395	Higher expr.	0
LUAD	MMP10	DSS	1.29534	0.172901	0.171796	Higher expr.	0
LUAD	MMP10	DFI	1.59287	0.0286883	0.0273201	Higher expr.	0
LUAD	MMP12	OS	1.07284	0.635428	0.635005	Higher expr.	0
LUAD	MMP12	PFS	1.0523	0.681096	0.681177	Higher expr.	0
LUAD	MMP12	DSS	0.972866	0.88459	0.885064	Lower expr.	0
LUAD	MMP12	DFI	1.42415	0.0987656	0.097108	Higher expr.	0
LUAD	MMP13	OS	1.04393	0.772805	0.772793	Higher expr.	0
LUAD	MMP13	PFS	0.935166	0.591047	0.591785	Lower expr.	0
LUAD	MMP13	DSS	0.988054	0.94941	0.94933	Lower expr.	0
LUAD	MMP13	DFI	1.18575	0.426409	0.425596	Higher expr.	0
LUAD	MMP14	OS	1.3182	0.0636626	0.0628826	Higher expr.	0
LUAD	MMP14	PFS	1.12432	0.344992	0.346077	Higher expr.	0
LUAD	MMP14	DSS	1.22268	0.288429	0.287668	Higher expr.	0
LUAD	MMP14	DFI	1.28964	0.231795	0.23067	Higher expr.	0
LUAD	MMP2	OS	0.916073	0.55633	0.556208	Lower expr.	0
LUAD	MMP2	PFS	1.06559	0.609874	0.610495	Higher expr.	0
LUAD	MMP2	DSS	0.859644	0.426509	0.425926	Lower expr.	0
LUAD	MMP2	DFI	1.05368	0.805643	0.805959	Higher expr.	0
LUAD	MMP3	OS	1.1824	0.261163	0.260639	Higher expr.	0
LUAD	MMP3	PFS	1.08776	0.500791	0.501228	Higher expr.	0
LUAD	MMP3	DSS	1.18313	0.375753	0.375351	Higher expr.	0
LUAD	MMP3	DFI	1.3765	0.142211	0.140632	Higher expr.	0
LUAD	MMP9	OS	1.14905	0.349707	0.349072	Higher expr.	0
LUAD	MMP9	PFS	0.967871	0.792104	0.791099	Lower expr.	0
LUAD	MMP9	DSS	1.14995	0.461292	0.460933	Higher expr.	0
LUAD	MMP9	DFI	1.27372	0.256783	0.256268	Higher expr.	0
LUAD	PECAM1	OS	0.85183	0.279275	0.278895	Lower expr.	0
LUAD	PECAM1	PFS	0.898968	0.390679	0.39033	Lower expr.	0
LUAD	PECAM1	DSS	0.863373	0.43735	0.436886	Lower expr.	0
LUAD	PECAM1	DFI	0.765686	0.2075	0.205905	Lower expr.	0
LUAD	SERPINE1	OS	1.28382	0.092525	0.0915853	Higher expr.	0
LUAD	SERPINE1	PFS	1.37612	0.0104121	0.0101588	Higher expr.	0
LUAD	SERPINE1	DSS	1.46774	0.0460804	0.044734	Higher expr.	0
LUAD	SERPINE1	DFI	1.34645	0.159849	0.158605	Higher expr.	0
LUAD	SPP1	OS	1.44431	0.0138367	0.0132857	Higher expr.	0
LUAD	SPP1	PFS	1.21315	0.119401	0.11856	Higher expr.	0
LUAD	SPP1	DSS	1.50488	0.0333537	0.0320839	Higher expr.	0
LUAD	SPP1	DFI	1.21856	0.350148	0.349977	Higher expr.	0
LUAD	TIMP2	OS	1.12242	0.4384	0.438033	Higher expr.	0
LUAD	TIMP2	PFS	1.07808	0.546143	0.546667	Higher expr.	0
LUAD	TIMP2	DSS	1.03508	0.855518	0.855655	Higher expr.	0
LUAD	TIMP2	DFI	1.13226	0.560525	0.560641	Higher expr.	0
LUAD	TNF	OS	0.797189	0.128492	0.127732	Lower expr.	0
LUAD	TNF	PFS	0.902047	0.407906	0.408051	Lower expr.	0
LUAD	TNF	DSS	0.716363	0.0831784	0.0818258	Lower expr.	0
LUAD	TNF	DFI	1.01091	0.959334	0.959232	Higher expr.	0
LUAD	TNFRSF11B	OS	1.03709	0.805981	0.806212	Higher expr.	0
LUAD	TNFRSF11B	PFS	1.10955	0.401817	0.402032	Higher expr.	0
LUAD	TNFRSF11B	DSS	1.0462	0.811365	0.811787	Higher expr.	0
LUAD	TNFRSF11B	DFI	1.39384	0.119175	0.117745	Higher expr.	0
LUSC	FGF2	OS	0.783485	0.0777706	0.0771133	Lower expr.	0
LUSC	FGF2	PFS	0.793599	0.0678813	0.0672064	Lower expr.	0
LUSC	FGF2	DSS	0.591348	0.0168884	0.0156906	Lower expr.	0
LUSC	FGF2	DFI	0.82618	0.4573	0.456576	Lower expr.	0
LUSC	ICAM1	OS	1.21363	0.160794	0.160114	Higher expr.	0
LUSC	ICAM1	PFS	1.18943	0.170035	0.16959	Higher expr.	0
LUSC	ICAM1	DSS	1.12285	0.590135	0.590158	Higher expr.	0
LUSC	ICAM1	DFI	1.05114	0.846115	0.845554	Higher expr.	0
LUSC	ICAM3	OS	1.00739	0.957457	0.957118	Higher expr.	0
LUSC	ICAM3	PFS	0.93163	0.575468	0.575367	Lower expr.	0
LUSC	ICAM3	DSS	0.779109	0.250359	0.249238	Lower expr.	0
LUSC	ICAM3	DFI	0.80922	0.412351	0.411791	Lower expr.	0
LUSC	ITGA2	OS	0.815881	0.140386	0.139635	Lower expr.	0
LUSC	ITGA2	PFS	0.872298	0.278833	0.277739	Lower expr.	0
LUSC	ITGA2	DSS	0.879999	0.551357	0.551094	Lower expr.	0
LUSC	ITGA2	DFI	0.98755	0.961128	0.960098	Lower expr.	0
LUSC	LCP1	OS	1.17096	0.252534	0.25167	Higher expr.	0
LUSC	LCP1	PFS	1.09021	0.493597	0.493573	Higher expr.	0
LUSC	LCP1	DSS	1.05756	0.794785	0.794501	Higher expr.	0
LUSC	LCP1	DFI	1.11651	0.667136	0.666939	Higher expr.	0
LUSC	MMP1	OS	1.22834	0.136464	0.135743	Higher expr.	0
LUSC	MMP1	PFS	1.17415	0.203473	0.203316	Higher expr.	0
LUSC	MMP1	DSS	1.13852	0.545749	0.545709	Higher expr.	0
LUSC	MMP1	DFI	0.901794	0.689941	0.689706	Lower expr.	0
LUSC	MMP10	OS	1.10535	0.468877	0.468216	Higher expr.	0
LUSC	MMP10	PFS	1.12472	0.353569	0.353184	Higher expr.	0
LUSC	MMP10	DSS	0.913796	0.67562	0.675515	Lower expr.	0
LUSC	MMP10	DFI	0.951986	0.848726	0.848636	Lower expr.	0
LUSC	MMP12	OS	1.12236	0.402348	0.402045	Higher expr.	0
LUSC	MMP12	PFS	1.14706	0.277539	0.277817	Higher expr.	0
LUSC	MMP12	DSS	0.912925	0.672864	0.672949	Lower expr.	0
LUSC	MMP12	DFI	0.998211	0.994483	0.994964	Lower expr.	0
LUSC	MMP13	OS	0.888359	0.391512	0.391499	Lower expr.	0
LUSC	MMP13	PFS	0.88015	0.312743	0.311964	Lower expr.	0
LUSC	MMP13	DSS	0.909013	0.657253	0.657125	Lower expr.	0
LUSC	MMP13	DFI	0.874276	0.600734	0.600442	Lower expr.	0
LUSC	MMP14	OS	1.0295	0.832951	0.83275	Higher expr.	0
LUSC	MMP14	PFS	1.07709	0.556761	0.557491	Higher expr.	0
LUSC	MMP14	DSS	1.14862	0.519818	0.51944	Higher expr.	0
LUSC	MMP14	DFI	1.27205	0.352939	0.351662	Higher expr.	0
LUSC	MMP2	OS	1.30537	0.0539701	0.0532492	Higher expr.	0
LUSC	MMP2	PFS	1.30264	0.0369117	0.0365008	Higher expr.	0
LUSC	MMP2	DSS	1.19636	0.404993	0.404356	Higher expr.	0
LUSC	MMP2	DFI	1.06184	0.815237	0.815241	Higher expr.	0
LUSC	MMP3	OS	1.03428	0.806833	0.807024	Higher expr.	0
LUSC	MMP3	PFS	1.06047	0.641525	0.641531	Higher expr.	0
LUSC	MMP3	DSS	1.0466	0.831944	0.832207	Higher expr.	0
LUSC	MMP3	DFI	1.02253	0.930795	0.930806	Higher expr.	0
LUSC	MMP9	OS	0.942608	0.66981	0.669868	Lower expr.	0
LUSC	MMP9	PFS	1.00259	0.983771	0.984841	Higher expr.	0
LUSC	MMP9	DSS	0.797888	0.296251	0.295386	Lower expr.	0
LUSC	MMP9	DFI	0.75976	0.284534	0.282728	Lower expr.	0
LUSC	PECAM1	OS	1.07962	0.57836	0.578016	Higher expr.	0
LUSC	PECAM1	PFS	1.16695	0.22239	0.222161	Higher expr.	0
LUSC	PECAM1	DSS	1.06167	0.780301	0.780251	Higher expr.	0
LUSC	PECAM1	DFI	1.13826	0.613407	0.613134	Higher expr.	0
LUSC	SERPINE1	OS	1.28613	0.0686124	0.0679605	Higher expr.	0
LUSC	SERPINE1	PFS	1.2979	0.0394273	0.0390438	Higher expr.	0
LUSC	SERPINE1	DSS	1.47517	0.0715313	0.0698293	Higher expr.	0
LUSC	SERPINE1	DFI	1.24651	0.39257	0.392037	Higher expr.	0
LUSC	SPP1	OS	1.24081	0.118035	0.117288	Higher expr.	0
LUSC	SPP1	PFS	1.19027	0.16757	0.167091	Higher expr.	0
LUSC	SPP1	DSS	0.981413	0.930483	0.930416	Lower expr.	0
LUSC	SPP1	DFI	1.16389	0.554098	0.553312	Higher expr.	0
LUSC	TIMP2	OS	1.25115	0.10504	0.104216	Higher expr.	0
LUSC	TIMP2	PFS	1.17868	0.193417	0.192964	Higher expr.	0
LUSC	TIMP2	DSS	1.20747	0.380449	0.379729	Higher expr.	0
LUSC	TIMP2	DFI	1.08567	0.748368	0.747749	Higher expr.	0
LUSC	TNF	OS	1.18807	0.212343	0.211733	Higher expr.	0
LUSC	TNF	PFS	1.16979	0.216124	0.215516	Higher expr.	0
LUSC	TNF	DSS	0.901519	0.632396	0.632206	Lower expr.	0
LUSC	TNF	DFI	0.902993	0.6919	0.691759	Lower expr.	0
LUSC	TNFRSF11B	OS	1.06284	0.659611	0.659266	Higher expr.	0
LUSC	TNFRSF11B	PFS	0.972526	0.825943	0.826376	Lower expr.	0
LUSC	TNFRSF11B	DSS	0.834139	0.40217	0.401475	Lower expr.	0
LUSC	TNFRSF11B	DFI	0.899707	0.680309	0.68065	Lower expr.	0
MESO	FGF2	OS	1.18459	0.476864	0.478298	Higher expr.	0
MESO	FGF2	PFS	1.12487	0.610391	0.612663	Higher expr.	0
MESO	FGF2	DSS	1.20387	0.5502	0.551887	Higher expr.	0
MESO	FGF2	DFI	1.08123	0.929171	0.929155	Higher expr.	0
MESO	ICAM1	OS	1.76224	0.0198055	0.0183937	Higher expr.	0
MESO	ICAM1	PFS	1.64524	0.0383687	0.0365001	Higher expr.	0
MESO	ICAM1	DSS	1.59277	0.132188	0.128789	Higher expr.	0
MESO	ICAM1	DFI	2.84513	0.238989	0.221027	Higher expr.	0
MESO	ICAM3	OS	0.934878	0.776884	0.77492	Lower expr.	0
MESO	ICAM3	PFS	0.828878	0.417422	0.416637	Lower expr.	0
MESO	ICAM3	DSS	0.97003	0.92114	0.920901	Lower expr.	0
MESO	ITGA2	OS	1.82675	0.0124697	0.0112816	Higher expr.	0
MESO	ITGA2	PFS	1.67513	0.0273917	0.0258977	Higher expr.	0
MESO	ITGA2	DSS	2.02649	0.0221247	0.0197826	Higher expr.	0
MESO	ITGA2	DFI	5.47723	0.229652	0.176803	Higher expr.	0
MESO	LCP1	OS	0.891115	0.628482	0.625057	Lower expr.	0
MESO	LCP1	PFS	0.876272	0.565141	0.564459	Lower expr.	0
MESO	LCP1	DSS	0.743912	0.340582	0.337081	Lower expr.	0
MESO	LCP1	DFI	1.57925e+09	0.999091	0.0405175	Higher expr.	0
MESO	MMP1	OS	1.51855	0.0817611	0.0793718	Higher expr.	0
MESO	MMP1	PFS	1.34541	0.199561	0.19767	Higher expr.	0
MESO	MMP1	DSS	1.692	0.0905995	0.0870573	Higher expr.	0
MESO	MMP1	DFI	2	0.408083	0.399983	Higher expr.	0
MESO	MMP10	OS	1.90461	0.00841943	0.00742821	Higher expr.	0
MESO	MMP10	PFS	1.87154	0.00903198	0.0080106	Higher expr.	0
MESO	MMP10	DSS	1.924	0.0353579	0.0321222	Higher expr.	0
MESO	MMP10	DFI	2	0.408083	0.399983	Higher expr.	0
MESO	MMP12	OS	1.27493	0.308324	0.307636	Higher expr.	0
MESO	MMP12	PFS	1.06251	0.791148	0.791075	Higher expr.	0
MESO	MMP12	DSS	1.22487	0.508977	0.510279	Higher expr.	0
MESO	MMP12	DFI	2	0.408083	0.399983	Higher expr.	0
MESO	MMP13	OS	1.966	0.00525938	0.00450855	Higher expr.	0
MESO	MMP13	PFS	1.87986	0.00739504	0.00659282	Higher expr.	0
MESO	MMP13	DSS	1.94315	0.0330227	0.0299847	Higher expr.	0
MESO	MMP13	DFI	1.08041	0.930327	0.930312	Higher expr.	0
MESO	MMP14	OS	1.65778	0.0357578	0.0342172	Higher expr.	0
MESO	MMP14	PFS	1.58905	0.0477509	0.0458623	Higher expr.	0
MESO	MMP14	DSS	1.96229	0.0348006	0.0316798	Higher expr.	0
MESO	MMP14	DFI	2.32633	0.335351	0.322094	Higher expr.	0
MESO	MMP2	OS	1.23448	0.372644	0.372404	Higher expr.	0
MESO	MMP2	PFS	1.22703	0.377157	0.377059	Higher expr.	0
MESO	MMP2	DSS	1.12999	0.689764	0.689629	Higher expr.	0
MESO	MMP2	DFI	4.88324	0.176911	0.138869	Higher expr.	0
MESO	MMP3	OS	1.02653	0.912158	0.911801	Higher expr.	0
MESO	MMP3	PFS	1.05959	0.805612	0.80497	Higher expr.	0
MESO	MMP3	DSS	0.918799	0.782444	0.784788	Lower expr.	0
MESO	MMP3	DFI	1.20178	0.834067	0.833853	Higher expr.	0
MESO	MMP9	OS	1.17437	0.5	0.501928	Higher expr.	0
MESO	MMP9	PFS	1.18476	0.459588	0.459029	Higher expr.	0
MESO	MMP9	DSS	0.903781	0.744146	0.741362	Lower expr.	0
MESO	MMP9	DFI	1.69774	0.523013	0.518551	Higher expr.	0
MESO	PECAM1	OS	1.67668	0.0305451	0.0291233	Higher expr.	0
MESO	PECAM1	PFS	1.29902	0.26085	0.260823	Higher expr.	0
MESO	PECAM1	DSS	2.0008	0.0269576	0.0243825	Higher expr.	0
MESO	PECAM1	DFI	9.49191e+08	0.999162	0.125528	Higher expr.	0
MESO	SERPINE1	OS	2.25826	0.000833707	0.000612032	Higher expr.	0
MESO	SERPINE1	PFS	1.99882	0.00377073	0.00316155	Higher expr.	0
MESO	SERPINE1	DSS	2.16147	0.0121797	0.0103601	Higher expr.	0
MESO	SERPINE1	DFI	5.45606e+09	0.999344	0.0100633	Higher expr.	0
MESO	SPP1	OS	1.17616	0.496641	0.497162	Higher expr.	0
MESO	SPP1	PFS	1.35939	0.182506	0.180762	Higher expr.	0
MESO	SPP1	DSS	0.874712	0.664185	0.663717	Lower expr.	0
MESO	SPP1	DFI	2	0.408083	0.399983	Higher expr.	0
MESO	TIMP2	OS	1.78223	0.0166543	0.0155287	Higher expr.	0
MESO	TIMP2	PFS	1.36517	0.177975	0.177306	Higher expr.	0
MESO	TIMP2	DSS	2.10623	0.0175644	0.0154432	Higher expr.	0
MESO	TIMP2	DFI	0.41765	0.432224	0.41886	Lower expr.	0
MESO	TNF	OS	1.06057	0.804511	0.806333	Higher expr.	0
MESO	TNF	PFS	0.818633	0.381965	0.38096	Lower expr.	0
MESO	TNF	DSS	1.13757	0.67555	0.675292	Higher expr.	0
MESO	TNF	DFI	3.71883	0.249891	0.221182	Higher expr.	0
MESO	TNFRSF11B	OS	1.50117	0.092759	0.0905603	Higher expr.	0
MESO	TNFRSF11B	PFS	1.50983	0.0863244	0.0845447	Higher expr.	0
MESO	TNFRSF11B	DSS	1.30338	0.388493	0.385203	Higher expr.	0
MESO	TNFRSF11B	DFI	1.50903	0.62072	0.618492	Higher expr.	0
OV	FGF2	OS	1.3561	0.0393887	0.0387852	Higher expr.	0
OV	FGF2	PFS	0.996823	0.98053	0.979722	Lower expr.	0
OV	FGF2	DSS	1.42362	0.0285528	0.0278954	Higher expr.	0
OV	FGF2	DFI	0.983673	0.933532	0.933775	Lower expr.	0
OV	ICAM1	OS	1.03059	0.837941	0.836544	Higher expr.	0
OV	ICAM1	PFS	0.835169	0.166516	0.1665	Lower expr.	0
OV	ICAM1	DSS	1.06409	0.698808	0.697381	Higher expr.	0
OV	ICAM1	DFI	0.707268	0.0826744	0.081674	Lower expr.	0
OV	ICAM3	OS	0.816286	0.168329	0.16641	Lower expr.	0
OV	ICAM3	PFS	0.900387	0.421119	0.421521	Lower expr.	0
OV	ICAM3	DSS	0.82141	0.21998	0.217617	Lower expr.	0
OV	ICAM3	DFI	0.777048	0.203245	0.202321	Lower expr.	0
OV	ITGA2	OS	0.948371	0.718958	0.717802	Lower expr.	0
OV	ITGA2	PFS	0.927777	0.5653	0.562488	Lower expr.	0
OV	ITGA2	DSS	0.90276	0.524069	0.522614	Lower expr.	0
OV	ITGA2	DFI	0.977525	0.908782	0.903596	Lower expr.	0
OV	LCP1	OS	1.08055	0.602542	0.605304	Higher expr.	0
OV	LCP1	PFS	1.01541	0.90706	0.90646	Higher expr.	0
OV	LCP1	DSS	0.988965	0.945572	0.942103	Lower expr.	0
OV	LCP1	DFI	0.892551	0.565038	0.562703	Lower expr.	0
OV	MMP1	OS	0.728507	0.0322037	0.0314035	Lower expr.	0
OV	MMP1	PFS	0.805803	0.0973456	0.0968011	Lower expr.	0
OV	MMP1	DSS	0.697993	0.0257357	0.0248884	Lower expr.	0
OV	MMP1	DFI	0.855478	0.432945	0.431559	Lower expr.	0
OV	MMP10	OS	0.967104	0.820706	0.8259	Lower expr.	0
OV	MMP10	PFS	0.933688	0.598489	0.600532	Lower expr.	0
OV	MMP10	DSS	0.93485	0.675431	0.680462	Lower expr.	0
OV	MMP10	DFI	1.12251	0.562652	0.557924	Higher expr.	0
OV	MMP12	OS	0.771615	0.0801908	0.0796676	Lower expr.	0
OV	MMP12	PFS	0.768301	0.0430351	0.042407	Lower expr.	0
OV	MMP12	DSS	0.751321	0.0776402	0.0768841	Lower expr.	0
OV	MMP12	DFI	0.844914	0.395712	0.395589	Lower expr.	0
OV	MMP13	OS	0.975048	0.863802	0.86211	Lower expr.	0
OV	MMP13	PFS	1.27082	0.066304	0.0655835	Higher expr.	0
OV	MMP13	DSS	0.995732	0.978724	0.976562	Lower expr.	0
OV	MMP13	DFI	1.46664	0.0536826	0.0525662	Higher expr.	0
OV	MMP14	OS	1.18923	0.240654	0.240005	Higher expr.	0
OV	MMP14	PFS	1.15945	0.257342	0.255669	Higher expr.	0
OV	MMP14	DSS	1.14745	0.392199	0.391829	Higher expr.	0
OV	MMP14	DFI	1.32554	0.153758	0.149498	Higher expr.	0
OV	MMP2	OS	1.08694	0.573468	0.573226	Higher expr.	0
OV	MMP2	PFS	1.27	0.0668798	0.0657545	Higher expr.	0
OV	MMP2	DSS	1.09382	0.578583	0.57861	Higher expr.	0
OV	MMP2	DFI	1.60161	0.0184661	0.0172221	Higher expr.	0
OV	MMP3	OS	1.10442	0.502314	0.503837	Higher expr.	0
OV	MMP3	PFS	1.0621	0.643324	0.642899	Higher expr.	0
OV	MMP3	DSS	1.11066	0.514879	0.5169	Higher expr.	0
OV	MMP3	DFI	1.05366	0.791006	0.789742	Higher expr.	0
OV	MMP9	OS	0.838495	0.236622	0.23543	Lower expr.	0
OV	MMP9	PFS	0.877539	0.316813	0.316758	Lower expr.	0
OV	MMP9	DSS	0.772167	0.111432	0.11009	Lower expr.	0
OV	MMP9	DFI	0.849462	0.409622	0.410176	Lower expr.	0
OV	PECAM1	OS	0.972521	0.849989	0.853084	Lower expr.	0
OV	PECAM1	PFS	0.904217	0.440848	0.443659	Lower expr.	0
OV	PECAM1	DSS	0.978517	0.892472	0.896014	Lower expr.	0
OV	PECAM1	DFI	0.834627	0.3646	0.369594	Lower expr.	0
OV	SERPINE1	OS	1.10623	0.494134	0.491902	Higher expr.	0
OV	SERPINE1	PFS	1.18758	0.187034	0.185217	Higher expr.	0
OV	SERPINE1	DSS	1.09813	0.560572	0.55831	Higher expr.	0
OV	SERPINE1	DFI	1.50459	0.039348	0.0372363	Higher expr.	0
OV	SPP1	OS	1.35189	0.0443299	0.0436278	Higher expr.	0
OV	SPP1	PFS	1.24012	0.103835	0.103435	Higher expr.	0
OV	SPP1	DSS	1.26894	0.143263	0.142563	Higher expr.	0
OV	SPP1	DFI	1.31708	0.16576	0.165495	Higher expr.	0
OV	TIMP2	OS	1.14084	0.372186	0.371076	Higher expr.	0
OV	TIMP2	PFS	1.10541	0.442073	0.440646	Higher expr.	0
OV	TIMP2	DSS	1.14999	0.385152	0.383978	Higher expr.	0
OV	TIMP2	DFI	1.23591	0.28439	0.280736	Higher expr.	0
OV	TNF	OS	0.998548	0.992179	0.995231	Lower expr.	0
OV	TNF	PFS	1.05035	0.707875	0.706597	Higher expr.	0
OV	TNF	DSS	0.965269	0.826712	0.829766	Lower expr.	0
OV	TNF	DFI	1.22586	0.305126	0.304224	Higher expr.	0
OV	TNFRSF11B	OS	1.00521	0.972065	0.972969	Higher expr.	0
OV	TNFRSF11B	PFS	1.12608	0.362262	0.362601	Higher expr.	0
OV	TNFRSF11B	DSS	0.973708	0.869076	0.868268	Lower expr.	0
OV	TNFRSF11B	DFI	1.04551	0.821632	0.824344	Higher expr.	0
PAAD	FGF2	OS	1.477	0.0627153	0.0609991	Higher expr.	0
PAAD	FGF2	PFS	1.45756	0.0395039	0.0383335	Higher expr.	0
PAAD	FGF2	DSS	1.61631	0.0432692	0.0412425	Higher expr.	0
PAAD	FGF2	DFI	2.21897	0.0706499	0.0637611	Higher expr.	0
PAAD	ICAM1	OS	1.2074	0.366338	0.366315	Higher expr.	0
PAAD	ICAM1	PFS	1.20853	0.302187	0.298944	Higher expr.	0
PAAD	ICAM1	DSS	1.30682	0.256594	0.255469	Higher expr.	0
PAAD	ICAM1	DFI	0.900743	0.806788	0.806708	Lower expr.	0
PAAD	ICAM3	OS	0.813387	0.321567	0.321402	Lower expr.	0
PAAD	ICAM3	PFS	1.0323	0.860903	0.856335	Higher expr.	0
PAAD	ICAM3	DSS	0.825294	0.413159	0.413045	Lower expr.	0
PAAD	ICAM3	DFI	1.11731	0.790868	0.790764	Higher expr.	0
PAAD	ITGA2	OS	1.86365	0.00417043	0.00362035	Higher expr.	0
PAAD	ITGA2	PFS	1.74346	0.00286741	0.00257058	Higher expr.	0
PAAD	ITGA2	DSS	1.95103	0.00654106	0.00562813	Higher expr.	0
PAAD	ITGA2	DFI	2.40051	0.0460057	0.0395191	Higher expr.	0
PAAD	LCP1	OS	0.763246	0.198424	0.196714	Lower expr.	0
PAAD	LCP1	PFS	0.802433	0.231331	0.232113	Lower expr.	0
PAAD	LCP1	DSS	0.819781	0.397481	0.396098	Lower expr.	0
PAAD	LCP1	DFI	1.26863	0.594439	0.593721	Higher expr.	0
PAAD	MMP1	OS	1.51278	0.0487414	0.0473248	Higher expr.	0
PAAD	MMP1	PFS	1.35071	0.0993003	0.098203	Higher expr.	0
PAAD	MMP1	DSS	1.4937	0.0874203	0.0857588	Higher expr.	0
PAAD	MMP1	DFI	1.56856	0.281484	0.277462	Higher expr.	0
PAAD	MMP10	OS	1.49774	0.0551688	0.053682	Higher expr.	0
PAAD	MMP10	PFS	1.27195	0.187539	0.187582	Higher expr.	0
PAAD	MMP10	DSS	1.50267	0.0841118	0.0821438	Higher expr.	0
PAAD	MMP10	DFI	2.08097	0.0893673	0.0827488	Higher expr.	0
PAAD	MMP12	OS	1.43693	0.084361	0.0829317	Higher expr.	0
PAAD	MMP12	PFS	1.44684	0.0460323	0.0446479	Higher expr.	0
PAAD	MMP12	DSS	1.77043	0.0178534	0.0164649	Higher expr.	0
PAAD	MMP12	DFI	3.40735	0.00803677	0.00509315	Higher expr.	0
PAAD	MMP13	OS	1.67422	0.0144704	0.0134847	Higher expr.	0
PAAD	MMP13	PFS	1.22887	0.257691	0.257148	Higher expr.	0
PAAD	MMP13	DSS	1.77457	0.0167572	0.0154544	Higher expr.	0
PAAD	MMP13	DFI	1.39259	0.434299	0.432346	Higher expr.	0
PAAD	MMP14	OS	1.58227	0.028422	0.0270849	Higher expr.	0
PAAD	MMP14	PFS	1.45445	0.0405234	0.0389772	Higher expr.	0
PAAD	MMP14	DSS	1.85229	0.0100148	0.00893571	Higher expr.	0
PAAD	MMP14	DFI	3.49608	0.00558369	0.00344784	Higher expr.	0
PAAD	MMP2	OS	1.17959	0.428436	0.427277	Higher expr.	0
PAAD	MMP2	PFS	1.18352	0.359233	0.356802	Higher expr.	0
PAAD	MMP2	DSS	1.27232	0.308512	0.306749	Higher expr.	0
PAAD	MMP2	DFI	1.66544	0.242732	0.238635	Higher expr.	0
PAAD	MMP3	OS	1.51187	0.0490726	0.0475466	Higher expr.	0
PAAD	MMP3	PFS	1.25806	0.207748	0.206696	Higher expr.	0
PAAD	MMP3	DSS	1.71776	0.022502	0.0209804	Higher expr.	0
PAAD	MMP3	DFI	1.71626	0.204958	0.200078	Higher expr.	0
PAAD	MMP9	OS	1.43025	0.0914728	0.0899417	Higher expr.	0
PAAD	MMP9	PFS	1.23031	0.258685	0.256946	Higher expr.	0
PAAD	MMP9	DSS	1.47365	0.105935	0.103936	Higher expr.	0
PAAD	MMP9	DFI	1.84804	0.14634	0.140521	Higher expr.	0
PAAD	PECAM1	OS	0.784831	0.245989	0.244391	Lower expr.	0
PAAD	PECAM1	PFS	0.804134	0.234688	0.234729	Lower expr.	0
PAAD	PECAM1	DSS	0.821652	0.401919	0.400536	Lower expr.	0
PAAD	PECAM1	DFI	0.535791	0.148648	0.142543	Lower expr.	0
PAAD	SERPINE1	OS	1.67061	0.0148523	0.0138404	Higher expr.	0
PAAD	SERPINE1	PFS	1.76028	0.00225176	0.0019897	Higher expr.	0
PAAD	SERPINE1	DSS	2.05101	0.00351599	0.00288804	Higher expr.	0
PAAD	SERPINE1	DFI	3.89897	0.00448116	0.00225973	Higher expr.	0
PAAD	SPP1	OS	1.49595	0.0563001	0.0547538	Higher expr.	0
PAAD	SPP1	PFS	1.44494	0.0450184	0.0439112	Higher expr.	0
PAAD	SPP1	DSS	1.74137	0.021766	0.0201796	Higher expr.	0
PAAD	SPP1	DFI	3.50569	0.00947984	0.00591268	Higher expr.	0
PAAD	TIMP2	OS	1.557	0.0354399	0.0339597	Higher expr.	0
PAAD	TIMP2	PFS	1.30807	0.144068	0.142516	Higher expr.	0
PAAD	TIMP2	DSS	1.89172	0.00884074	0.00777812	Higher expr.	0
PAAD	TIMP2	DFI	2.5553	0.0384132	0.0329016	Higher expr.	0
PAAD	TNF	OS	0.655605	0.0462279	0.0446582	Lower expr.	0
PAAD	TNF	PFS	0.731388	0.0865743	0.0857384	Lower expr.	0
PAAD	TNF	DSS	0.723226	0.171758	0.169762	Lower expr.	0
PAAD	TNF	DFI	0.493298	0.0938127	0.0872314	Lower expr.	0
PAAD	TNFRSF11B	OS	1.17348	0.446048	0.445936	Higher expr.	0
PAAD	TNFRSF11B	PFS	1.11857	0.538535	0.535459	Higher expr.	0
PAAD	TNFRSF11B	DSS	1.04169	0.862321	0.863187	Higher expr.	0
PAAD	TNFRSF11B	DFI	1.08303	0.851144	0.851108	Higher expr.	0
PCPG	FGF2	OS	0.889272	0.87128	0.869203	Lower expr.	0
PCPG	FGF2	PFS	0.721413	0.431152	0.428078	Lower expr.	0
PCPG	FGF2	DSS	1.69968	0.548306	0.544298	Higher expr.	0
PCPG	FGF2	DFI	1.17096	0.874684	0.874555	Higher expr.	0
PCPG	ICAM1	OS	1.04151	0.954247	0.955879	Higher expr.	0
PCPG	ICAM1	PFS	1.47564	0.348083	0.345355	Higher expr.	0
PCPG	ICAM1	DSS	1.05307	0.949659	0.951482	Higher expr.	0
PCPG	ICAM1	DFI	1.01817	0.985648	0.985648	Higher expr.	0
PCPG	ICAM3	OS	0.645618	0.556035	0.550746	Lower expr.	0
PCPG	ICAM3	PFS	1.41808	0.403081	0.401101	Higher expr.	0
PCPG	ICAM3	DSS	1.1462	0.871416	0.872764	Higher expr.	0
PCPG	ICAM3	DFI	2.84287	0.369121	0.348509	Higher expr.	0
PCPG	ITGA2	OS	0.34668	0.195188	0.176103	Lower expr.	0
PCPG	ITGA2	PFS	0.483292	0.0941275	0.0876479	Lower expr.	0
PCPG	ITGA2	DSS	1.77777e-09	0.99839	0.0177399	Lower expr.	0
PCPG	ITGA2	DFI	3.63542	0.273321	0.244826	Higher expr.	0
PCPG	LCP1	OS	0.322667	0.167046	0.14651	Lower expr.	0
PCPG	LCP1	PFS	0.536156	0.14123	0.135796	Lower expr.	0
PCPG	LCP1	DSS	0.495613	0.419297	0.41299	Lower expr.	0
PCPG	LCP1	DFI	2.68789	0.392727	0.373742	Higher expr.	0
PCPG	MMP1	OS	2.91388	0.19097	0.170339	Higher expr.	0
PCPG	MMP1	PFS	2.27204	0.0605184	0.0538627	Higher expr.	0
PCPG	MMP1	DSS	1.92114	0.452129	0.444454	Higher expr.	0
PCPG	MMP1	DFI	3.90472	0.240153	0.205952	Higher expr.	0
PCPG	MMP10	OS	1.01891	0.97895	0.973721	Higher expr.	0
PCPG	MMP10	PFS	1.72472	0.198563	0.191561	Higher expr.	0
PCPG	MMP10	DSS	1.03569	0.965906	0.959733	Higher expr.	0
PCPG	MMP10	DFI	2.75111	0.381069	0.360903	Higher expr.	0
PCPG	MMP12	OS	0.906204	0.892767	0.896585	Lower expr.	0
PCPG	MMP12	PFS	2.16296	0.0626174	0.0557494	Higher expr.	0
PCPG	MMP12	DSS	0.746615	0.735934	0.73872	Lower expr.	0
PCPG	MMP12	DFI	4.4044	0.200044	0.161438	Higher expr.	0
PCPG	MMP13	OS	1.60563	0.56255	0.560583	Higher expr.	0
PCPG	MMP13	PFS	2.46185	0.038558	0.0326599	Higher expr.	0
PCPG	MMP13	DSS	0.95794	0.968749	0.965801	Lower expr.	0
PCPG	MMP13	DFI	4.09528e-09	0.999088	0.35524	Lower expr.	0
PCPG	MMP14	OS	1.03937	0.956557	0.958262	Higher expr.	0
PCPG	MMP14	PFS	1.25351	0.583268	0.583159	Higher expr.	0
PCPG	MMP14	DSS	1.04582	0.956389	0.958315	Higher expr.	0
PCPG	MMP14	DFI	1.22935	0.839242	0.838987	Higher expr.	0
PCPG	MMP2	OS	0.499808	0.355315	0.349128	Lower expr.	0
PCPG	MMP2	PFS	0.765787	0.519702	0.520611	Lower expr.	0
PCPG	MMP2	DSS	0.146089	0.0885444	0.0544914	Lower expr.	0
PCPG	MMP2	DFI	0.424606	0.460306	0.446982	Lower expr.	0
PCPG	MMP3	OS	3.22619	0.125298	0.104761	Higher expr.	0
PCPG	MMP3	PFS	0.785534	0.6598	0.657844	Lower expr.	0
PCPG	MMP3	DSS	2.87666	0.247321	0.225756	Higher expr.	0
PCPG	MMP3	DFI	3.72139e-09	0.998993	0.28658	Lower expr.	0
PCPG	MMP9	OS	0.841924	0.811769	0.812838	Lower expr.	0
PCPG	MMP9	PFS	0.984675	0.969857	0.970796	Lower expr.	0
PCPG	MMP9	DSS	0.786928	0.7753	0.776146	Lower expr.	0
PCPG	MMP9	DFI	0.357636	0.373293	0.352363	Lower expr.	0
PCPG	PECAM1	OS	0.714368	0.659712	0.655781	Lower expr.	0
PCPG	PECAM1	PFS	0.767559	0.519434	0.517111	Lower expr.	0
PCPG	PECAM1	DSS	0.622243	0.603277	0.596729	Lower expr.	0
PCPG	PECAM1	DFI	0.303254	0.301792	0.273672	Lower expr.	0
PCPG	SERPINE1	OS	0.130823	0.0573725	0.0250513	Lower expr.	0
PCPG	SERPINE1	PFS	0.754994	0.494514	0.495232	Lower expr.	0
PCPG	SERPINE1	DSS	1.49116e-09	0.998376	0.00975126	Lower expr.	0
PCPG	SERPINE1	DFI	0.967753	0.973866	0.973865	Lower expr.	0
PCPG	SPP1	OS	0.690062	0.612011	0.607442	Lower expr.	0
PCPG	SPP1	PFS	1.04594	0.913021	0.91415	Higher expr.	0
PCPG	SPP1	DSS	0.575365	0.524051	0.515694	Lower expr.	0
PCPG	SPP1	DFI	0.477928	0.523814	0.514537	Lower expr.	0
PCPG	TIMP2	OS	0.213509	0.0637236	0.0433799	Lower expr.	0
PCPG	TIMP2	PFS	0.693284	0.373125	0.37245	Lower expr.	0
PCPG	TIMP2	DSS	0.310771	0.187989	0.167902	Lower expr.	0
PCPG	TIMP2	DFI	0.705567	0.727391	0.726067	Lower expr.	0
PCPG	TNF	OS	0.67614	0.592517	0.593684	Lower expr.	0
PCPG	TNF	PFS	0.639065	0.28902	0.286372	Lower expr.	0
PCPG	TNF	DSS	0.568178	0.514565	0.51244	Lower expr.	0
PCPG	TNF	DFI	0.406034	0.437053	0.421951	Lower expr.	0
PCPG	TNFRSF11B	OS	0.150681	0.0769423	0.0412499	Lower expr.	0
PCPG	TNFRSF11B	PFS	0.405457	0.0449046	0.0383323	Lower expr.	0
PCPG	TNFRSF11B	DSS	0.213764	0.159591	0.122096	Lower expr.	0
PCPG	TNFRSF11B	DFI	0.388321	0.417856	0.40163	Lower expr.	0
PRAD	FGF2	OS	0.875477	0.843376	0.843279	Lower expr.	0
PRAD	FGF2	PFS	0.621115	0.0209783	0.0198173	Lower expr.	0
PRAD	FGF2	DSS	0.286929	0.273595	0.245465	Lower expr.	0
PRAD	FGF2	DFI	0.398723	0.0168814	0.0133943	Lower expr.	0
PRAD	ICAM1	OS	0.700595	0.584368	0.582617	Lower expr.	0
PRAD	ICAM1	PFS	1.09938	0.641065	0.641105	Higher expr.	0
PRAD	ICAM1	DSS	0.501583	0.455845	0.447562	Lower expr.	0
PRAD	ICAM1	DFI	0.93469	0.851188	0.851143	Lower expr.	0
PRAD	ICAM3	OS	0.536362	0.337858	0.330384	Lower expr.	0
PRAD	ICAM3	PFS	0.992789	0.971535	0.971317	Lower expr.	0
PRAD	ICAM3	DSS	0.611765	0.590988	0.587286	Lower expr.	0
PRAD	ICAM3	DFI	1.16829	0.669401	0.668642	Higher expr.	0
PRAD	ITGA2	OS	1.14504	0.831431	0.831309	Higher expr.	0
PRAD	ITGA2	PFS	0.504337	0.00140923	0.00113651	Lower expr.	0
PRAD	ITGA2	DSS	0.670185	0.662443	0.660381	Lower expr.	0
PRAD	ITGA2	DFI	0.234822	0.00074645	0.000239092	Lower expr.	0
PRAD	LCP1	OS	0.658435	0.570533	0.567855	Lower expr.	0
PRAD	LCP1	PFS	0.716221	0.1053	0.103732	Lower expr.	0
PRAD	LCP1	DSS	0.335876	0.344888	0.321198	Lower expr.	0
PRAD	LCP1	DFI	0.698562	0.320505	0.318156	Lower expr.	0
PRAD	MMP1	OS	1.2712	0.712055	0.711421	Higher expr.	0
PRAD	MMP1	PFS	0.885508	0.547993	0.54785	Lower expr.	0
PRAD	MMP1	DSS	0.64574	0.633102	0.630448	Lower expr.	0
PRAD	MMP1	DFI	0.677303	0.284726	0.281892	Lower expr.	0
PRAD	MMP10	OS	0.66065	0.52114	0.518171	Lower expr.	0
PRAD	MMP10	PFS	1.25884	0.257491	0.256423	Higher expr.	0
PRAD	MMP10	DSS	1.35342	0.740626	0.73968	Higher expr.	0
PRAD	MMP10	DFI	1.28678	0.48486	0.483674	Higher expr.	0
PRAD	MMP12	OS	0.370419	0.151683	0.135759	Lower expr.	0
PRAD	MMP12	PFS	0.904039	0.618567	0.618382	Lower expr.	0
PRAD	MMP12	DSS	0.498938	0.45242	0.443988	Lower expr.	0
PRAD	MMP12	DFI	0.692166	0.312509	0.309743	Lower expr.	0
PRAD	MMP13	OS	1.23554	0.74186	0.741432	Higher expr.	0
PRAD	MMP13	PFS	1.3267	0.165183	0.163845	Higher expr.	0
PRAD	MMP13	DSS	1.88316	0.495085	0.488511	Higher expr.	0
PRAD	MMP13	DFI	1.23379	0.560652	0.560267	Higher expr.	0
PRAD	MMP14	OS	0.496041	0.312016	0.302434	Lower expr.	0
PRAD	MMP14	PFS	0.972736	0.89132	0.891301	Lower expr.	0
PRAD	MMP14	DSS	0.263597	0.233546	0.200267	Lower expr.	0
PRAD	MMP14	DFI	0.870864	0.70182	0.701562	Lower expr.	0
PRAD	MMP2	OS	0.297921	0.130748	0.109846	Lower expr.	0
PRAD	MMP2	PFS	0.961111	0.844974	0.844948	Lower expr.	0
PRAD	MMP2	DSS	0.278522	0.256788	0.226729	Lower expr.	0
PRAD	MMP2	DFI	0.850259	0.653403	0.653008	Lower expr.	0
PRAD	MMP3	OS	1.89528	0.356589	0.348657	Higher expr.	0
PRAD	MMP3	PFS	1.08426	0.689763	0.689496	Higher expr.	0
PRAD	MMP3	DSS	1.35216	0.741352	0.740413	Higher expr.	0
PRAD	MMP3	DFI	0.801428	0.543292	0.542409	Lower expr.	0
PRAD	MMP9	OS	0.651583	0.519645	0.517061	Lower expr.	0
PRAD	MMP9	PFS	1.04605	0.824605	0.824962	Higher expr.	0
PRAD	MMP9	DSS	2.58168	0.412855	0.395707	Higher expr.	0
PRAD	MMP9	DFI	0.931847	0.844486	0.843999	Lower expr.	0
PRAD	PECAM1	OS	1.03719	0.95443	0.954427	Higher expr.	0
PRAD	PECAM1	PFS	1.36201	0.131951	0.13042	Higher expr.	0
PRAD	PECAM1	DSS	0.670481	0.662284	0.660206	Lower expr.	0
PRAD	PECAM1	DFI	1.19167	0.625999	0.625173	Higher expr.	0
PRAD	SERPINE1	OS	0.687066	0.563318	0.561104	Lower expr.	0
PRAD	SERPINE1	PFS	1.25995	0.257057	0.255889	Higher expr.	0
PRAD	SERPINE1	DSS	1.37759	0.725983	0.724865	Higher expr.	0
PRAD	SERPINE1	DFI	1.39434	0.357143	0.354623	Higher expr.	0
PRAD	SPP1	OS	2.36508	0.215448	0.202054	Higher expr.	0
PRAD	SPP1	PFS	1.45642	0.0666193	0.0650159	Higher expr.	0
PRAD	SPP1	DSS	5.35415e+08	0.998534	0.03455	Higher expr.	0
PRAD	SPP1	DFI	0.834133	0.618478	0.617548	Lower expr.	0
PRAD	TIMP2	OS	0.521369	0.355612	0.347945	Lower expr.	0
PRAD	TIMP2	PFS	0.766522	0.192033	0.190791	Lower expr.	0
PRAD	TIMP2	DSS	0.73675	0.741937	0.74105	Lower expr.	0
PRAD	TIMP2	DFI	0.501158	0.0658653	0.0607066	Lower expr.	0
PRAD	TNF	OS	0.924933	0.902375	0.902351	Lower expr.	0
PRAD	TNF	PFS	1.10472	0.622503	0.62251	Higher expr.	0
PRAD	TNF	DSS	0.269231	0.2411	0.2086	Lower expr.	0
PRAD	TNF	DFI	0.700341	0.334116	0.331234	Lower expr.	0
PRAD	TNFRSF11B	OS	0.893244	0.858763	0.85869	Lower expr.	0
PRAD	TNFRSF11B	PFS	0.872298	0.499541	0.49902	Lower expr.	0
PRAD	TNFRSF11B	DSS	0.523382	0.484647	0.477619	Lower expr.	0
PRAD	TNFRSF11B	DFI	0.868848	0.695757	0.695498	Lower expr.	0
READ	FGF2	OS	1.63596	0.306286	0.302453	Higher expr.	0
READ	FGF2	PFS	1.7028	0.161778	0.157183	Higher expr.	0
READ	FGF2	DSS	0.717627	0.717151	0.715933	Lower expr.	0
READ	FGF2	DFI	1.9631	0.55522	0.548495	Higher expr.	0
READ	ICAM1	OS	1.81859	0.223095	0.225207	Higher expr.	0
READ	ICAM1	PFS	1.57108	0.238671	0.242576	Higher expr.	0
READ	ICAM1	DSS	1.56367	0.624513	0.621633	Higher expr.	0
READ	ICAM1	DFI	1.84836	0.590657	0.585398	Higher expr.	0
READ	ICAM3	OS	0.598881	0.295877	0.280575	Lower expr.	0
READ	ICAM3	PFS	0.614514	0.200215	0.188319	Lower expr.	0
READ	ICAM3	DSS	0.210348	0.164457	0.125519	Lower expr.	0
READ	ICAM3	DFI	1.28779	0.784884	0.784373	Higher expr.	0
READ	ITGA2	OS	0.468749	0.131619	0.117382	Lower expr.	0
READ	ITGA2	PFS	0.548473	0.119014	0.109155	Lower expr.	0
READ	ITGA2	DSS	0.508061	0.460821	0.452538	Lower expr.	0
READ	ITGA2	DFI	0.897741	0.911485	0.911454	Lower expr.	0
READ	LCP1	OS	1.109	0.831855	0.835364	Higher expr.	0
READ	LCP1	PFS	1.13809	0.732987	0.735886	Higher expr.	0
READ	LCP1	DSS	0.682142	0.67548	0.673623	Lower expr.	0
READ	LCP1	DFI	1.17658	0.85991	0.859765	Higher expr.	0
READ	MMP1	OS	0.657355	0.387536	0.390525	Lower expr.	0
READ	MMP1	PFS	0.64117	0.239918	0.241029	Lower expr.	0
READ	MMP1	DSS	0.470509	0.415975	0.40584	Lower expr.	0
READ	MMP1	DFI	1.3419	0.810506	0.809841	Higher expr.	0
READ	MMP10	OS	0.391406	0.0755989	0.0644045	Lower expr.	0
READ	MMP10	PFS	0.703032	0.354427	0.347804	Lower expr.	0
READ	MMP10	DSS	0.208504	0.161404	0.121934	Lower expr.	0
READ	MMP10	DFI	1.22039	0.829428	0.829171	Higher expr.	0
READ	MMP12	OS	0.832973	0.708273	0.716423	Lower expr.	0
READ	MMP12	PFS	0.85488	0.672513	0.682252	Lower expr.	0
READ	MMP12	DSS	0.589086	0.562347	0.557795	Lower expr.	0
READ	MMP12	DFI	1.12043	0.901755	0.901705	Higher expr.	0
READ	MMP13	OS	0.746318	0.54033	0.538978	Lower expr.	0
READ	MMP13	PFS	0.549865	0.11085	0.10575	Lower expr.	0
READ	MMP13	DSS	0.593545	0.571923	0.567829	Lower expr.	0
READ	MMP13	DFI	0.542895	0.51166	0.505666	Lower expr.	0
READ	MMP14	OS	2.34267	0.0897881	0.0798149	Higher expr.	0
READ	MMP14	PFS	2.81254	0.0101244	0.00708945	Higher expr.	0
READ	MMP14	DSS	5.95275e+08	0.998522	0.025468	Higher expr.	0
READ	MMP14	DFI	3.30727e+08	0.999001	0.246448	Higher expr.	0
READ	MMP2	OS	0.969638	0.948334	0.946029	Lower expr.	0
READ	MMP2	PFS	1.28249	0.503846	0.502277	Higher expr.	0
READ	MMP2	DSS	0.275271	0.248727	0.21686	Lower expr.	0
READ	MMP2	DFI	1.27607	0.842345	0.841961	Higher expr.	0
READ	MMP3	OS	0.564447	0.25534	0.253368	Lower expr.	0
READ	MMP3	PFS	0.736832	0.421642	0.425843	Lower expr.	0
READ	MMP3	DSS	0.539042	0.501804	0.495298	Lower expr.	0
READ	MMP3	DFI	2.2061	0.490136	0.480131	Higher expr.	0
READ	MMP9	OS	1.11965	0.81182	0.810917	Higher expr.	0
READ	MMP9	PFS	1.1419	0.72247	0.720035	Higher expr.	0
READ	MMP9	DSS	0.773507	0.77892	0.778335	Lower expr.	0
READ	MMP9	DFI	1.11278	0.907915	0.907875	Higher expr.	0
READ	PECAM1	OS	2.83356	0.0487015	0.0400606	Higher expr.	0
READ	PECAM1	PFS	2.13896	0.0504086	0.0457602	Higher expr.	0
READ	PECAM1	DSS	4.38291	0.186311	0.148445	Higher expr.	0
READ	PECAM1	DFI	1.81715	0.514413	0.508288	Higher expr.	0
READ	SERPINE1	OS	2.22971	0.111693	0.106105	Higher expr.	0
READ	SERPINE1	PFS	2.06898	0.0653945	0.0621722	Higher expr.	0
READ	SERPINE1	DSS	1.56079	0.626088	0.623248	Higher expr.	0
READ	SERPINE1	DFI	1.7985	0.60861	0.604096	Higher expr.	0
READ	SPP1	OS	2.53777	0.0599713	0.0531587	Higher expr.	0
READ	SPP1	PFS	2.10602	0.0477748	0.0434665	Higher expr.	0
READ	SPP1	DSS	5.30656	0.137368	0.0973585	Higher expr.	0
READ	SPP1	DFI	3.16999	0.303648	0.277741	Higher expr.	0
READ	TIMP2	OS	1.8871	0.190473	0.187465	Higher expr.	0
READ	TIMP2	PFS	2.00382	0.0704796	0.0665474	Higher expr.	0
READ	TIMP2	DSS	4.43808	0.182758	0.144666	Higher expr.	0
READ	TIMP2	DFI	1.27607	0.842345	0.841961	Higher expr.	0
READ	TNF	OS	1.20387	0.705212	0.69535	Higher expr.	0
READ	TNF	PFS	1.77219	0.138616	0.129315	Higher expr.	0
READ	TNF	DSS	0.627915	0.612371	0.609274	Lower expr.	0
READ	TNF	DFI	3.09076	0.316231	0.292003	Higher expr.	0
READ	TNFRSF11B	OS	0.863154	0.759247	0.74405	Lower expr.	0
READ	TNFRSF11B	PFS	0.689818	0.328006	0.316076	Lower expr.	0
READ	TNFRSF11B	DSS	1.21954	0.828097	0.827822	Higher expr.	0
READ	TNFRSF11B	DFI	0.789644	0.797539	0.797099	Lower expr.	0
SARC	FGF2	OS	1.00422	0.983309	0.983823	Higher expr.	0
SARC	FGF2	PFS	0.954749	0.77224	0.772851	Lower expr.	0
SARC	FGF2	DSS	0.956501	0.84048	0.839813	Lower expr.	0
SARC	FGF2	DFI	0.941799	0.803898	0.80401	Lower expr.	0
SARC	ICAM1	OS	0.793089	0.256846	0.255992	Lower expr.	0
SARC	ICAM1	PFS	0.988966	0.944789	0.946801	Lower expr.	0
SARC	ICAM1	DSS	0.864864	0.515802	0.515893	Lower expr.	0
SARC	ICAM1	DFI	1.19415	0.462025	0.45815	Higher expr.	0
SARC	ICAM3	OS	0.741273	0.143187	0.141493	Lower expr.	0
SARC	ICAM3	PFS	1.03647	0.822627	0.821701	Higher expr.	0
SARC	ICAM3	DSS	0.885804	0.585405	0.584781	Lower expr.	0
SARC	ICAM3	DFI	1.06015	0.808492	0.804775	Higher expr.	0
SARC	ITGA2	OS	1.07285	0.726664	0.726676	Higher expr.	0
SARC	ITGA2	PFS	1.39397	0.0386837	0.037952	Higher expr.	0
SARC	ITGA2	DSS	1.21716	0.37632	0.375461	Higher expr.	0
SARC	ITGA2	DFI	1.5387	0.0811327	0.0796208	Higher expr.	0
SARC	LCP1	OS	0.633128	0.0257126	0.0245052	Lower expr.	0
SARC	LCP1	PFS	0.741654	0.0628419	0.0615989	Lower expr.	0
SARC	LCP1	DSS	0.63027	0.0404734	0.0388154	Lower expr.	0
SARC	LCP1	DFI	0.717068	0.169186	0.16607	Lower expr.	0
SARC	MMP1	OS	1.63726	0.0154927	0.0145319	Higher expr.	0
SARC	MMP1	PFS	1.55192	0.00632657	0.00598459	Higher expr.	0
SARC	MMP1	DSS	1.57316	0.0425247	0.0409107	Higher expr.	0
SARC	MMP1	DFI	1.66747	0.0353892	0.0338623	Higher expr.	0
SARC	MMP10	OS	1.70463	0.00899324	0.00826162	Higher expr.	0
SARC	MMP10	PFS	1.40255	0.0352295	0.0342023	Higher expr.	0
SARC	MMP10	DSS	1.70784	0.0172214	0.0160242	Higher expr.	0
SARC	MMP10	DFI	1.13679	0.594799	0.589313	Higher expr.	0
SARC	MMP12	OS	1.37951	0.113081	0.111983	Higher expr.	0
SARC	MMP12	PFS	1.51148	0.0102925	0.00980926	Higher expr.	0
SARC	MMP12	DSS	1.34162	0.187325	0.186507	Higher expr.	0
SARC	MMP12	DFI	1.75722	0.0212961	0.0196657	Higher expr.	0
SARC	MMP13	OS	1.62799	0.0165131	0.0155214	Higher expr.	0
SARC	MMP13	PFS	1.55206	0.00652796	0.00616327	Higher expr.	0
SARC	MMP13	DSS	1.62098	0.0308996	0.0293873	Higher expr.	0
SARC	MMP13	DFI	1.77862	0.0189258	0.0174329	Higher expr.	0
SARC	MMP14	OS	1.356	0.131503	0.129789	Higher expr.	0
SARC	MMP14	PFS	1.16969	0.326648	0.324582	Higher expr.	0
SARC	MMP14	DSS	1.29168	0.247801	0.246133	Higher expr.	0
SARC	MMP14	DFI	0.919412	0.73223	0.735491	Lower expr.	0
SARC	MMP2	OS	1.05671	0.784087	0.783457	Higher expr.	0
SARC	MMP2	PFS	0.985766	0.928487	0.930271	Lower expr.	0
SARC	MMP2	DSS	1.05666	0.803364	0.802673	Higher expr.	0
SARC	MMP2	DFI	0.793784	0.346615	0.348442	Lower expr.	0
SARC	MMP3	OS	1.12549	0.557815	0.559194	Higher expr.	0
SARC	MMP3	PFS	1.10034	0.55169	0.551358	Higher expr.	0
SARC	MMP3	DSS	1.13576	0.565446	0.566973	Higher expr.	0
SARC	MMP3	DFI	1.03579	0.884733	0.884481	Higher expr.	0
SARC	MMP9	OS	1.0211	0.917428	0.917509	Higher expr.	0
SARC	MMP9	PFS	1.35665	0.0577539	0.0564156	Higher expr.	0
SARC	MMP9	DSS	0.928076	0.736581	0.736271	Lower expr.	0
SARC	MMP9	DFI	1.66555	0.0371436	0.0347097	Higher expr.	0
SARC	PECAM1	OS	0.944297	0.775787	0.777357	Lower expr.	0
SARC	PECAM1	PFS	0.93946	0.69575	0.699013	Lower expr.	0
SARC	PECAM1	DSS	0.954727	0.834081	0.8359	Lower expr.	0
SARC	PECAM1	DFI	0.80832	0.383187	0.387073	Lower expr.	0
SARC	SERPINE1	OS	1.65562	0.0135963	0.0127266	Higher expr.	0
SARC	SERPINE1	PFS	1.51621	0.00979457	0.00928388	Higher expr.	0
SARC	SERPINE1	DSS	1.601	0.0355226	0.0340556	Higher expr.	0
SARC	SERPINE1	DFI	1.60442	0.0511321	0.0489504	Higher expr.	0
SARC	SPP1	OS	1.05873	0.776688	0.775522	Higher expr.	0
SARC	SPP1	PFS	1.14648	0.392155	0.390404	Higher expr.	0
SARC	SPP1	DSS	0.907856	0.662744	0.66366	Lower expr.	0
SARC	SPP1	DFI	1.11686	0.64667	0.642524	Higher expr.	0
SARC	TIMP2	OS	1.14691	0.496832	0.496543	Higher expr.	0
SARC	TIMP2	PFS	1.09553	0.568618	0.565288	Higher expr.	0
SARC	TIMP2	DSS	1.07986	0.728592	0.728702	Higher expr.	0
SARC	TIMP2	DFI	0.85857	0.537682	0.541488	Lower expr.	0
SARC	TNF	OS	0.5356	0.00267937	0.00228477	Lower expr.	0
SARC	TNF	PFS	0.688761	0.0205061	0.019764	Lower expr.	0
SARC	TNF	DSS	0.49429	0.00230406	0.00186712	Lower expr.	0
SARC	TNF	DFI	0.774736	0.290702	0.289657	Lower expr.	0
SARC	TNFRSF11B	OS	0.851435	0.425725	0.425094	Lower expr.	0
SARC	TNFRSF11B	PFS	0.95373	0.767045	0.767825	Lower expr.	0
SARC	TNFRSF11B	DSS	0.839648	0.431157	0.430407	Lower expr.	0
SARC	TNFRSF11B	DFI	0.977039	0.923432	0.924685	Lower expr.	0
SKCM	FGF2	OS	0.609616	0.000287003	0.000250775	Lower expr.	0
SKCM	FGF2	PFS	0.786724	0.0328055	0.0323449	Lower expr.	0
SKCM	FGF2	DSS	0.60292	0.000636705	0.000561154	Lower expr.	0
SKCM	ICAM1	OS	0.634845	0.000813929	0.000736091	Lower expr.	0
SKCM	ICAM1	PFS	0.810811	0.0602822	0.0598003	Lower expr.	0
SKCM	ICAM1	DSS	0.601838	0.000566737	0.000495888	Lower expr.	0
SKCM	ICAM3	OS	0.812202	0.127573	0.12668	Lower expr.	0
SKCM	ICAM3	PFS	0.917462	0.443978	0.444212	Lower expr.	0
SKCM	ICAM3	DSS	0.763687	0.0689515	0.0679804	Lower expr.	0
SKCM	ITGA2	OS	0.787608	0.0789224	0.0782359	Lower expr.	0
SKCM	ITGA2	PFS	0.802505	0.0495516	0.0491444	Lower expr.	0
SKCM	ITGA2	DSS	0.78104	0.0940665	0.0932827	Lower expr.	0
SKCM	LCP1	OS	0.63953	0.000993769	0.000904053	Lower expr.	0
SKCM	LCP1	PFS	0.797971	0.0439198	0.043578	Lower expr.	0
SKCM	LCP1	DSS	0.59718	0.000492861	0.000427664	Lower expr.	0
SKCM	MMP1	OS	1.0882	0.531389	0.531484	Higher expr.	0
SKCM	MMP1	PFS	0.972427	0.802202	0.800794	Lower expr.	0
SKCM	MMP1	DSS	1.04921	0.742974	0.743095	Higher expr.	0
SKCM	MMP10	OS	1.17092	0.241212	0.241031	Higher expr.	0
SKCM	MMP10	PFS	0.965502	0.753861	0.752669	Lower expr.	0
SKCM	MMP10	DSS	1.15801	0.315312	0.31523	Higher expr.	0
SKCM	MMP12	OS	0.791183	0.0819654	0.0814693	Lower expr.	0
SKCM	MMP12	PFS	0.906078	0.376248	0.376041	Lower expr.	0
SKCM	MMP12	DSS	0.780347	0.0893591	0.0887119	Lower expr.	0
SKCM	MMP13	OS	1.44061	0.00690359	0.0065858	Higher expr.	0
SKCM	MMP13	PFS	1.27722	0.0279682	0.0274456	Higher expr.	0
SKCM	MMP13	DSS	1.40192	0.0208824	0.0202175	Higher expr.	0
SKCM	MMP14	OS	1.39432	0.0149704	0.0145175	Higher expr.	0
SKCM	MMP14	PFS	1.37758	0.00516095	0.00503846	Higher expr.	0
SKCM	MMP14	DSS	1.33806	0.0493585	0.0485141	Higher expr.	0
SKCM	MMP2	OS	1.51664	0.00226567	0.00210653	Higher expr.	0
SKCM	MMP2	PFS	1.12978	0.278413	0.277565	Higher expr.	0
SKCM	MMP2	DSS	1.48144	0.007748	0.00736155	Higher expr.	0
SKCM	MMP3	OS	1.2703	0.0760267	0.0753861	Higher expr.	0
SKCM	MMP3	PFS	1.1607	0.182248	0.18244	Higher expr.	0
SKCM	MMP3	DSS	1.31402	0.061516	0.0607375	Higher expr.	0
SKCM	MMP9	OS	0.833259	0.17602	0.175518	Lower expr.	0
SKCM	MMP9	PFS	0.893572	0.315212	0.314902	Lower expr.	0
SKCM	MMP9	DSS	0.810943	0.151862	0.151223	Lower expr.	0
SKCM	PECAM1	OS	0.766412	0.0487664	0.0481254	Lower expr.	0
SKCM	PECAM1	PFS	0.9589	0.708059	0.706994	Lower expr.	0
SKCM	PECAM1	DSS	0.773013	0.0784453	0.0775888	Lower expr.	0
SKCM	SERPINE1	OS	0.688968	0.0063669	0.00608442	Lower expr.	0
SKCM	SERPINE1	PFS	0.852311	0.153747	0.153535	Lower expr.	0
SKCM	SERPINE1	DSS	0.690571	0.012459	0.0119857	Lower expr.	0
SKCM	SPP1	OS	0.855585	0.248735	0.248107	Lower expr.	0
SKCM	SPP1	PFS	0.940153	0.58068	0.579634	Lower expr.	0
SKCM	SPP1	DSS	0.876211	0.368254	0.36744	Lower expr.	0
SKCM	TIMP2	OS	1.22532	0.133503	0.132618	Higher expr.	0
SKCM	TIMP2	PFS	1.1252	0.294268	0.293979	Higher expr.	0
SKCM	TIMP2	DSS	1.16006	0.312321	0.311404	Higher expr.	0
SKCM	TNF	OS	0.652205	0.00188379	0.00174227	Lower expr.	0
SKCM	TNF	PFS	0.778885	0.0257587	0.0254622	Lower expr.	0
SKCM	TNF	DSS	0.579367	0.00031344	0.000264328	Lower expr.	0
SKCM	TNFRSF11B	OS	0.599673	0.000161395	0.000137483	Lower expr.	0
SKCM	TNFRSF11B	PFS	0.72319	0.00383945	0.00368262	Lower expr.	0
SKCM	TNFRSF11B	DSS	0.594587	0.000405287	0.000349726	Lower expr.	0
STAD	FGF2	OS	1.2588	0.149848	0.149118	Higher expr.	0
STAD	FGF2	PFS	1.39093	0.0218302	0.0212672	Higher expr.	0
STAD	FGF2	DSS	1.27537	0.238068	0.236886	Higher expr.	0
STAD	FGF2	DFI	1.73291	0.0731904	0.0695978	Higher expr.	0
STAD	ICAM1	OS	1.03075	0.849377	0.849069	Higher expr.	0
STAD	ICAM1	PFS	1.0216	0.88123	0.882955	Higher expr.	0
STAD	ICAM1	DSS	1.00019	0.999264	0.99889	Higher expr.	0
STAD	ICAM1	DFI	1.13552	0.674832	0.675075	Higher expr.	0
STAD	ICAM3	OS	1.16207	0.348343	0.34763	Higher expr.	0
STAD	ICAM3	PFS	1.12211	0.421357	0.421645	Higher expr.	0
STAD	ICAM3	DSS	1.12883	0.555824	0.555336	Higher expr.	0
STAD	ICAM3	DFI	1.16093	0.621782	0.621455	Higher expr.	0
STAD	ITGA2	OS	0.878161	0.415203	0.415131	Lower expr.	0
STAD	ITGA2	PFS	1.02062	0.886495	0.885569	Higher expr.	0
STAD	ITGA2	DSS	0.871086	0.502169	0.501691	Lower expr.	0
STAD	ITGA2	DFI	1.16708	0.608897	0.609628	Higher expr.	0
STAD	LCP1	OS	1.13448	0.429166	0.428611	Higher expr.	0
STAD	LCP1	PFS	1.12109	0.424268	0.424478	Higher expr.	0
STAD	LCP1	DSS	0.979075	0.918121	0.918508	Lower expr.	0
STAD	LCP1	DFI	1.01308	0.965644	0.965073	Higher expr.	0
STAD	MMP1	OS	1.1617	0.347485	0.347196	Higher expr.	0
STAD	MMP1	PFS	1.19055	0.223145	0.222741	Higher expr.	0
STAD	MMP1	DSS	1.14938	0.498361	0.498284	Higher expr.	0
STAD	MMP1	DFI	0.841289	0.577511	0.576294	Lower expr.	0
STAD	MMP10	OS	1.06834	0.678236	0.677944	Higher expr.	0
STAD	MMP10	PFS	1.09679	0.518293	0.518565	Higher expr.	0
STAD	MMP10	DSS	0.924846	0.705565	0.705253	Lower expr.	0
STAD	MMP10	DFI	0.817128	0.519781	0.517746	Lower expr.	0
STAD	MMP12	OS	0.692255	0.0227776	0.0220515	Lower expr.	0
STAD	MMP12	PFS	0.662096	0.00460508	0.00430666	Lower expr.	0
STAD	MMP12	DSS	0.526825	0.00282326	0.00239144	Lower expr.	0
STAD	MMP12	DFI	0.500325	0.0297427	0.0266036	Lower expr.	0
STAD	MMP13	OS	1.10404	0.535471	0.535423	Higher expr.	0
STAD	MMP13	PFS	1.15386	0.317551	0.317402	Higher expr.	0
STAD	MMP13	DSS	0.995962	0.984425	0.984316	Lower expr.	0
STAD	MMP13	DFI	1.21501	0.519855	0.519697	Higher expr.	0
STAD	MMP14	OS	1.37224	0.0501155	0.0491072	Higher expr.	0
STAD	MMP14	PFS	1.4442	0.0113583	0.0108839	Higher expr.	0
STAD	MMP14	DSS	1.41652	0.0946923	0.0930487	Higher expr.	0
STAD	MMP14	DFI	2.35337	0.00888797	0.0070863	Higher expr.	0
STAD	MMP2	OS	1.21944	0.215092	0.214272	Higher expr.	0
STAD	MMP2	PFS	1.20893	0.18641	0.185602	Higher expr.	0
STAD	MMP2	DSS	1.02962	0.887437	0.88722	Higher expr.	0
STAD	MMP2	DFI	0.884526	0.686614	0.686984	Lower expr.	0
STAD	MMP3	OS	1.00897	0.955281	0.955382	Higher expr.	0
STAD	MMP3	PFS	0.889061	0.411592	0.4117	Lower expr.	0
STAD	MMP3	DSS	0.783776	0.240318	0.23915	Lower expr.	0
STAD	MMP3	DFI	0.437474	0.0147653	0.012137	Lower expr.	0
STAD	MMP9	OS	0.928456	0.642299	0.642321	Lower expr.	0
STAD	MMP9	PFS	0.812165	0.147567	0.146273	Lower expr.	0
STAD	MMP9	DSS	0.999271	0.997174	0.997212	Lower expr.	0
STAD	MMP9	DFI	0.816496	0.501509	0.501252	Lower expr.	0
STAD	PECAM1	OS	1.56702	0.00576393	0.0053699	Higher expr.	0
STAD	PECAM1	PFS	1.54673	0.00273392	0.00253367	Higher expr.	0
STAD	PECAM1	DSS	1.38953	0.1118	0.110126	Higher expr.	0
STAD	PECAM1	DFI	1.68376	0.089686	0.0862367	Higher expr.	0
STAD	SERPINE1	OS	1.9326	5.5137e-05	4.0518e-05	Higher expr.	0
STAD	SERPINE1	PFS	1.80198	5.4204e-05	4.2115e-05	Higher expr.	0
STAD	SERPINE1	DSS	1.64788	0.0157305	0.0147313	Higher expr.	0
STAD	SERPINE1	DFI	2.38713	0.00559088	0.00425595	Higher expr.	0
STAD	SPP1	OS	1.18034	0.299087	0.298669	Higher expr.	0
STAD	SPP1	PFS	1.16433	0.288563	0.288661	Higher expr.	0
STAD	SPP1	DSS	1.09994	0.643994	0.64393	Higher expr.	0
STAD	SPP1	DFI	2.10129	0.0183546	0.0158978	Higher expr.	0
STAD	TIMP2	OS	1.35627	0.0580472	0.0570063	Higher expr.	0
STAD	TIMP2	PFS	1.47263	0.00752681	0.00715619	Higher expr.	0
STAD	TIMP2	DSS	1.36433	0.133181	0.131626	Higher expr.	0
STAD	TIMP2	DFI	1.63626	0.109084	0.10568	Higher expr.	0
STAD	TNF	OS	0.866244	0.368745	0.368565	Lower expr.	0
STAD	TNF	PFS	0.899519	0.460443	0.459716	Lower expr.	0
STAD	TNF	DSS	0.888735	0.568475	0.568041	Lower expr.	0
STAD	TNF	DFI	0.929903	0.811127	0.81166	Lower expr.	0
STAD	TNFRSF11B	OS	1.27275	0.13076	0.129513	Higher expr.	0
STAD	TNFRSF11B	PFS	1.30332	0.064649	0.0637366	Higher expr.	0
STAD	TNFRSF11B	DSS	1.36753	0.129443	0.127752	Higher expr.	0
STAD	TNFRSF11B	DFI	1.34972	0.322184	0.320332	Higher expr.	0
TGCT	FGF2	OS	2.35718	0.464181	0.451517	Higher expr.	0
TGCT	FGF2	PFS	1.38749	0.313347	0.305651	Higher expr.	0
TGCT	FGF2	DSS	1.97712	0.57785	0.570469	Higher expr.	0
TGCT	FGF2	DFI	1.37698	0.38188	0.367223	Higher expr.	0
TGCT	ICAM1	OS	2.96122	0.347146	0.32365	Higher expr.	0
TGCT	ICAM1	PFS	1.00874	0.977826	0.982035	Higher expr.	0
TGCT	ICAM1	DSS	1.99854	0.57184	0.564139	Higher expr.	0
TGCT	ICAM1	DFI	1.1437	0.704979	0.711733	Higher expr.	0
TGCT	ICAM3	OS	2.10984	0.542191	0.532796	Higher expr.	0
TGCT	ICAM3	PFS	0.653868	0.189754	0.183764	Lower expr.	0
TGCT	ICAM3	DSS	2.07559	0.551074	0.542211	Higher expr.	0
TGCT	ICAM3	DFI	0.634023	0.207982	0.198054	Lower expr.	0
TGCT	ITGA2	OS	2.3318	0.469734	0.457441	Higher expr.	0
TGCT	ITGA2	PFS	1.14241	0.67645	0.667107	Higher expr.	0
TGCT	ITGA2	DSS	1.95184	0.585064	0.578054	Higher expr.	0
TGCT	ITGA2	DFI	1.07297	0.843344	0.830312	Higher expr.	0
TGCT	LCP1	OS	0.918908	0.932668	0.932648	Lower expr.	0
TGCT	LCP1	PFS	0.567937	0.0780364	0.073099	Lower expr.	0
TGCT	LCP1	DSS	0.453291	0.51858	0.5077	Lower expr.	0
TGCT	LCP1	DFI	0.746066	0.417418	0.407282	Lower expr.	0
TGCT	MMP1	OS	1.79224	0.633921	0.629108	Higher expr.	0
TGCT	MMP1	PFS	1.38825	0.31499	0.308003	Higher expr.	0
TGCT	MMP1	DSS	1.82093	0.624713	0.619528	Higher expr.	0
TGCT	MMP1	DFI	1.30013	0.46679	0.453998	Higher expr.	0
TGCT	MMP10	OS	5.35995e+08	0.998864	0.10102	Higher expr.	0
TGCT	MMP10	PFS	1.42177	0.279891	0.272085	Higher expr.	0
TGCT	MMP10	DSS	5.43865e+08	0.998862	0.0983349	Higher expr.	0
TGCT	MMP10	DFI	1.34074	0.415979	0.402025	Higher expr.	0
TGCT	MMP12	OS	2.3318	0.469734	0.457441	Higher expr.	0
TGCT	MMP12	PFS	1.20255	0.560913	0.562186	Higher expr.	0
TGCT	MMP12	DSS	1.95184	0.585064	0.578054	Higher expr.	0
TGCT	MMP12	DFI	1.55052	0.218388	0.218571	Higher expr.	0
TGCT	MMP13	OS	0.710849	0.738621	0.737535	Lower expr.	0
TGCT	MMP13	PFS	1.09398	0.776196	0.774244	Higher expr.	0
TGCT	MMP13	DSS	0.459984	0.526178	0.515779	Lower expr.	0
TGCT	MMP13	DFI	1.0732	0.843289	0.839345	Higher expr.	0
TGCT	MMP14	OS	5.03501e+08	0.998729	0.0772339	Higher expr.	0
TGCT	MMP14	PFS	1.41465	0.287731	0.281516	Higher expr.	0
TGCT	MMP14	DSS	5.7364e+08	0.998857	0.0889935	Higher expr.	0
TGCT	MMP14	DFI	1.24708	0.541984	0.533203	Higher expr.	0
TGCT	MMP2	OS	2.25588	0.506624	0.494896	Higher expr.	0
TGCT	MMP2	PFS	0.942543	0.851804	0.847252	Lower expr.	0
[truncated: 376 more rows]
