# Supplementary material for: Pan-cancer analyses of senescence-related genes in extracellular matrix characterization in cancer
Source: Discov Oncol. 2023 Nov 20;14:208. doi: 10.1007/s12672-023-00828-7 (PMC10660488; doi:10.1007/s12672-023-00828-7)
Supplement: Supplementary file 18 — Supplementary file18 (XLSX 44 KB) [file 12672_2023_828_MOESM18_ESM.xlsx]

## Sheet: SheetName
Table S13 The summary of CNV in pan-cancer
cancertype	symbol	a_total	d_total	a_hete	d_hete	a_homo	d_homo	entrez
ACC	FGF2	38.8889	12.2222	38.8889	12.2222	0	0	2247
ACC	ICAM1	63.3333	4.44444	58.8889	4.44444	4.44444	0	3383
ACC	ICAM3	63.3333	4.44444	58.8889	4.44444	4.44444	0	3385
ACC	ITGA2	67.7778	4.44444	65.5556	4.44444	2.22222	0	3673
ACC	LCP1	7.77778	45.5556	6.66667	45.5556	1.11111	0	3936
ACC	MMP1	5.55556	30	5.55556	30	0	0	4312
ACC	MMP10	6.66667	28.8889	6.66667	28.8889	0	0	4319
ACC	MMP12	5.55556	30	5.55556	30	0	0	4321
ACC	MMP13	5.55556	30	5.55556	30	0	0	4322
ACC	MMP14	30	20	28.8889	20	1.11111	0	4323
ACC	MMP2	55.5556	6.66667	54.4444	6.66667	1.11111	0	4313
ACC	MMP3	5.55556	30	5.55556	30	0	0	4314
ACC	MMP9	56.6667	3.33333	54.4444	3.33333	2.22222	0	4318
ACC	SERPINE1	54.4444	7.77778	53.3333	6.66667	1.11111	1.11111	5054
ACC	SPP1	40	11.1111	40	11.1111	0	0	6696
ACC	TIMP2	13.3333	23.3333	13.3333	23.3333	0	0	7077
ACC	TNF	17.7778	20	17.7778	18.8889	0	1.11111	7124
ACC	TNFRSF11B	42.2222	14.4444	42.2222	14.4444	0	0	4982
BLCA	FGF2	6.86275	39.7059	6.12745	39.2157	0.735294	0.490196	2247
BLCA	ICAM1	19.6078	28.6765	18.1373	28.6765	1.47059	0	3383
BLCA	ICAM3	19.8529	28.6765	18.1373	28.6765	1.71569	0	3385
BLCA	ITGA2	12.7451	41.6667	11.7647	40.1961	0.980392	1.47059	3673
BLCA	LCP1	17.402	35.049	16.6667	29.902	0.735294	5.14706	3936
BLCA	MMP1	16.9118	30.6373	12.5	30.1471	4.41176	0.490196	4312
BLCA	MMP10	16.9118	30.6373	12.5	30.1471	4.41176	0.490196	4319
BLCA	MMP12	16.6667	31.1275	12.5	30.6373	4.16667	0.490196	4321
BLCA	MMP13	16.9118	30.8824	12.7451	30.3922	4.16667	0.490196	4322
BLCA	MMP14	20.5882	28.9216	18.3824	27.6961	2.20588	1.22549	4323
BLCA	MMP2	18.6275	29.902	18.3824	29.1667	0.245098	0.735294	4313
BLCA	MMP3	16.6667	31.1275	12.5	30.6373	4.16667	0.490196	4314
BLCA	MMP9	59.5588	2.94118	57.598	2.94118	1.96078	0	4318
BLCA	SERPINE1	37.2549	8.33333	35.5392	8.08824	1.71569	0.245098	5054
BLCA	SPP1	10.049	33.8235	8.33333	33.3333	1.71569	0.490196	6696
BLCA	TIMP2	47.7941	4.41176	45.5882	4.41176	2.20588	0	7077
BLCA	TNF	26.9608	19.1176	25	18.6275	1.96078	0.490196	7124
BLCA	TNFRSF11B	60.2941	4.65686	53.6765	4.65686	6.61765	0	4982
BRCA	FGF2	10.1852	28.7963	9.62963	28.6111	0.555556	0.185185	2247
BRCA	ICAM1	19.3519	20.9259	17.5926	20.9259	1.75926	0	3383
BRCA	ICAM3	19.4444	20.9259	17.5926	20.9259	1.85185	0	3385
BRCA	ITGA2	21.2963	22.3148	20.9259	21.2963	0.37037	1.01852	3673
BRCA	LCP1	7.77778	45.7407	7.59259	43.9815	0.185185	1.75926	3936
BRCA	MMP1	10.1852	45.5556	9.72222	44.2593	0.462963	1.2963	4312
BRCA	MMP10	10.1852	45.5556	9.72222	44.2593	0.462963	1.2963	4319
BRCA	MMP12	10	45.7407	9.53704	44.4444	0.462963	1.2963	4321
BRCA	MMP13	10	45.7407	9.53704	44.4444	0.462963	1.2963	4322
BRCA	MMP14	18.2407	22.2222	16.7593	22.2222	1.48148	0	4323
BRCA	MMP2	12.7778	57.037	11.2037	55.3704	1.57407	1.66667	4313
BRCA	MMP3	10	45.7407	9.53704	44.4444	0.462963	1.2963	4314
BRCA	MMP9	44.3519	5.37037	41.3889	5.27778	2.96296	0.0925926	4318
BRCA	SERPINE1	26.9444	13.7963	26.1111	13.7037	0.833333	0.0925926	5054
BRCA	SPP1	10	28.6111	9.53704	28.3333	0.462963	0.277778	6696
BRCA	TIMP2	36.2963	15.6481	30.5556	15.5556	5.74074	0.0925926	7077
BRCA	TNF	25.0926	14.2593	23.6111	14.2593	1.48148	0	7124
BRCA	TNFRSF11B	61.3889	2.96296	42.6852	2.87037	18.7037	0.0925926	4982
CESC	FGF2	6.44068	33.5593	6.44068	32.8814	0	0.677966	2247
CESC	ICAM1	13.8983	26.7797	12.5424	25.7627	1.35593	1.01695	3383
CESC	ICAM3	13.8983	26.4407	12.5424	25.4237	1.35593	1.01695	3385
CESC	ITGA2	10.1695	22.3729	9.49153	20.678	0.677966	1.69492	3673
CESC	LCP1	7.11864	39.661	7.11864	36.6102	0	3.05085	3936
CESC	MMP1	14.2373	37.9661	5.08475	36.6102	9.15254	1.35593	4312
CESC	MMP10	13.8983	37.9661	5.08475	36.6102	8.81356	1.35593	4319
CESC	MMP12	13.8983	38.9831	5.08475	37.2881	8.81356	1.69492	4321
CESC	MMP13	13.2203	39.322	5.08475	37.6271	8.13559	1.69492	4322
CESC	MMP14	15.9322	10.8475	14.5763	10.5085	1.35593	0.338983	4323
CESC	MMP2	12.8814	19.661	12.8814	19.322	0	0.338983	4313
CESC	MMP3	14.2373	38.6441	5.08475	36.9492	9.15254	1.69492	4314
CESC	MMP9	38.6441	6.10169	37.2881	6.10169	1.35593	0	4318
CESC	SERPINE1	14.2373	13.8983	13.2203	13.5593	1.01695	0.338983	5054
CESC	SPP1	5.76271	32.5424	5.76271	31.8644	0	0.677966	6696
CESC	TIMP2	22.7119	13.8983	22.0339	13.2203	0.677966	0.677966	7077
CESC	TNF	26.4407	11.8644	24.0678	11.8644	2.37288	0	7124
CESC	TNFRSF11B	40	6.44068	37.6271	6.44068	2.37288	0	4982
CHOL	FGF2	5.55556	44.4444	5.55556	44.4444	0	0	2247
CHOL	ICAM1	13.8889	13.8889	13.8889	13.8889	0	0	3383
CHOL	ICAM3	13.8889	13.8889	13.8889	13.8889	0	0	3385
CHOL	ITGA2	22.2222	19.4444	22.2222	19.4444	0	0	3673
CHOL	LCP1	8.33333	47.2222	8.33333	47.2222	0	0	3936
CHOL	MMP1	8.33333	27.7778	8.33333	27.7778	0	0	4312
CHOL	MMP10	8.33333	27.7778	8.33333	27.7778	0	0	4319
CHOL	MMP12	8.33333	27.7778	8.33333	27.7778	0	0	4321
CHOL	MMP13	8.33333	27.7778	8.33333	27.7778	0	0	4322
CHOL	MMP14	2.77778	38.8889	2.77778	38.8889	0	0	4323
CHOL	MMP2	13.8889	16.6667	13.8889	16.6667	0	0	4313
CHOL	MMP3	8.33333	27.7778	8.33333	27.7778	0	0	4314
CHOL	MMP9	36.1111	2.77778	36.1111	2.77778	0	0	4318
CHOL	SERPINE1	16.6667	11.1111	13.8889	11.1111	2.77778	0	5054
CHOL	SPP1	5.55556	36.1111	5.55556	36.1111	0	0	6696
CHOL	TIMP2	22.2222	5.55556	19.4444	5.55556	2.77778	0	7077
CHOL	TNF	25	11.1111	22.2222	11.1111	2.77778	0	7124
CHOL	TNFRSF11B	41.6667	2.77778	33.3333	2.77778	8.33333	0	4982
COAD	FGF2	3.7694	30.8204	3.7694	30.3769	0	0.443459	2247
COAD	ICAM1	15.9645	9.7561	15.9645	9.31264	0	0.443459	3383
COAD	ICAM3	15.7428	9.7561	15.7428	9.31264	0	0.443459	3385
COAD	ITGA2	11.0865	19.0687	10.643	18.4035	0.443459	0.665188	3673
COAD	LCP1	58.3149	3.7694	54.7672	3.10421	3.54767	0.665188	3936
COAD	MMP1	13.082	15.0776	12.8603	14.8559	0.22173	0.22173	4312
COAD	MMP10	13.082	15.0776	12.8603	14.8559	0.22173	0.22173	4319
COAD	MMP12	13.082	14.8559	12.8603	14.6341	0.22173	0.22173	4321
COAD	MMP13	13.082	14.8559	12.8603	14.6341	0.22173	0.22173	4322
COAD	MMP14	8.42572	31.4856	8.42572	31.4856	0	0	4323
COAD	MMP2	23.9468	5.76497	23.7251	5.76497	0.22173	0	4313
COAD	MMP3	13.082	14.8559	12.8603	14.6341	0.22173	0.22173	4314
COAD	MMP9	72.2838	0.443459	64.3016	0.443459	7.98226	0	4318
COAD	SERPINE1	49.0022	1.33038	48.337	1.33038	0.665188	0	5054
COAD	SPP1	4.43459	29.2683	4.43459	29.0466	0	0.22173	6696
COAD	TIMP2	23.7251	12.1951	23.0599	12.1951	0.665188	0	7077
COAD	TNF	20.8426	9.7561	20.6208	9.31264	0.22173	0.443459	7124
COAD	TNFRSF11B	57.2062	1.77384	52.3282	1.77384	4.87805	0	4982
DLBC	FGF2	0	12.5	0	12.5	0	0	2247
DLBC	ICAM1	4.16667	4.16667	4.16667	4.16667	0	0	3383
DLBC	ICAM3	4.16667	4.16667	4.16667	4.16667	0	0	3385
DLBC	ITGA2	14.5833	2.08333	14.5833	2.08333	0	0	3673
DLBC	LCP1	12.5	10.4167	12.5	6.25	0	4.16667	3936
DLBC	MMP1	29.1667	4.16667	29.1667	2.08333	0	2.08333	4312
DLBC	MMP10	29.1667	4.16667	29.1667	2.08333	0	2.08333	4319
DLBC	MMP12	29.1667	4.16667	29.1667	2.08333	0	2.08333	4321
DLBC	MMP13	29.1667	4.16667	29.1667	2.08333	0	2.08333	4322
DLBC	MMP14	4.16667	4.16667	4.16667	4.16667	0	0	4323
DLBC	MMP2	14.5833	10.4167	14.5833	8.33333	0	2.08333	4313
DLBC	MMP3	29.1667	4.16667	29.1667	2.08333	0	2.08333	4314
DLBC	MMP9	8.33333	2.08333	8.33333	2.08333	0	0	4318
DLBC	SERPINE1	29.1667	4.16667	27.0833	4.16667	2.08333	0	5054
DLBC	SPP1	0	12.5	0	10.4167	0	2.08333	6696
DLBC	TIMP2	6.25	8.33333	6.25	8.33333	0	0	7077
DLBC	TNF	14.5833	14.5833	12.5	8.33333	2.08333	6.25	7124
DLBC	TNFRSF11B	22.9167	4.16667	20.8333	4.16667	2.08333	0	4982
ESCA	FGF2	10.8696	50	10.8696	49.4565	0	0.543478	2247
ESCA	ICAM1	14.6739	41.8478	13.0435	41.3043	1.63043	0.543478	3383
ESCA	ICAM3	14.1304	42.3913	13.0435	41.8478	1.08696	0.543478	3385
ESCA	ITGA2	9.23913	57.0652	8.69565	54.3478	0.543478	2.71739	3673
ESCA	LCP1	24.4565	39.1304	23.913	38.0435	0.543478	1.08696	3936
ESCA	MMP1	18.4783	36.9565	13.587	35.8696	4.8913	1.08696	4312
ESCA	MMP10	18.4783	36.9565	13.587	35.8696	4.8913	1.08696	4319
ESCA	MMP12	18.4783	36.9565	13.587	35.8696	4.8913	1.08696	4321
ESCA	MMP13	18.4783	36.9565	13.587	35.8696	4.8913	1.08696	4322
ESCA	MMP14	28.8043	27.1739	27.7174	27.1739	1.08696	0	4323
ESCA	MMP2	25	27.7174	23.913	27.1739	1.08696	0.543478	4313
ESCA	MMP3	18.4783	36.9565	13.587	35.8696	4.8913	1.08696	4314
ESCA	MMP9	64.6739	2.17391	58.6957	2.17391	5.97826	0	4318
ESCA	SERPINE1	54.8913	12.5	44.5652	12.5	10.3261	0	5054
ESCA	SPP1	11.9565	50	11.413	49.4565	0.543478	0.543478	6696
ESCA	TIMP2	33.1522	16.8478	30.9783	16.8478	2.17391	0	7077
ESCA	TNF	27.7174	21.1957	22.8261	21.1957	4.8913	0	7124
ESCA	TNFRSF11B	71.1957	5.97826	57.0652	5.97826	14.1304	0	4982
GBM	FGF2	5.19931	10.5719	5.026	10.5719	0.17331	0	2247
GBM	ICAM1	41.4211	4.85269	40.208	4.85269	1.21317	0	3383
GBM	ICAM3	41.7678	5.026	40.3813	5.026	1.38648	0	3385
GBM	ITGA2	8.14558	7.10572	8.14558	6.93241	0	0.17331	3673
GBM	LCP1	1.38648	41.2478	1.38648	40.0347	0	1.21317	3936
GBM	MMP1	2.94627	16.2912	2.42634	16.2912	0.519931	0	4312
GBM	MMP10	2.94627	16.2912	2.42634	16.2912	0.519931	0	4319
GBM	MMP12	2.94627	16.2912	2.42634	16.2912	0.519931	0	4321
GBM	MMP13	2.94627	16.2912	2.42634	16.2912	0.519931	0	4322
GBM	MMP14	4.50607	29.8094	4.15945	29.636	0.34662	0.17331	4323
GBM	MMP2	6.23917	15.2513	6.06586	15.078	0.17331	0.17331	4313
GBM	MMP3	2.94627	16.2912	2.42634	16.2912	0.519931	0	4314
GBM	MMP9	38.1282	2.94627	37.9549	2.94627	0.17331	0	4318
GBM	SERPINE1	81.6291	1.03986	80.7626	1.03986	0.866551	0	5054
GBM	SPP1	4.67938	10.9185	4.67938	10.9185	0	0	6696
GBM	TIMP2	13.5182	8.31889	13.3449	8.14558	0.17331	0.17331	7077
GBM	TNF	4.85269	13.8648	4.85269	13.8648	0	0	7124
GBM	TNFRSF11B	11.0919	7.62565	10.5719	7.62565	0.519931	0	4982
HNSC	FGF2	9.1954	30.0766	9.1954	29.6935	0	0.383142	2247
HNSC	ICAM1	11.3027	22.7969	10.3448	22.7969	0.957854	0	3383
HNSC	ICAM3	11.3027	22.7969	10.3448	22.7969	0.957854	0	3385
HNSC	ITGA2	10.728	36.0153	9.96169	35.4406	0.766284	0.574713	3673
HNSC	LCP1	10.9195	42.1456	10.728	41.3793	0.191571	0.766284	3936
HNSC	MMP1	18.0077	39.272	13.41	37.931	4.5977	1.341	4312
HNSC	MMP10	18.1992	39.0805	13.41	37.7395	4.78927	1.341	4319
HNSC	MMP12	18.0077	39.4636	13.41	38.1226	4.5977	1.341	4321
HNSC	MMP13	17.6245	39.6552	13.41	38.3142	4.21456	1.341	4322
HNSC	MMP14	28.7356	14.751	27.7778	14.5594	0.957854	0.191571	4323
HNSC	MMP2	21.8391	18.1992	21.2644	17.8161	0.574713	0.383142	4313
HNSC	MMP3	18.0077	39.4636	13.41	38.1226	4.5977	1.341	4314
HNSC	MMP9	37.931	6.13027	37.7395	5.9387	0.191571	0.191571	4318
HNSC	SERPINE1	31.4176	8.23755	27.0115	8.23755	4.40613	0	5054
HNSC	SPP1	10.5364	28.5441	10.1533	28.5441	0.383142	0	6696
HNSC	TIMP2	21.2644	9.1954	21.0728	9.1954	0.191571	0	7077
HNSC	TNF	18.1992	16.092	17.2414	15.9004	0.957854	0.191571	7124
HNSC	TNFRSF11B	72.7969	0.574713	64.751	0.574713	8.04598	0	4982
KICH	FGF2	34.8485	1.51515	34.8485	1.51515	0	0	2247
KICH	ICAM1	30.303	1.51515	30.303	1.51515	0	0	3383
KICH	ICAM3	30.303	1.51515	30.303	1.51515	0	0	3385
KICH	ITGA2	13.6364	13.6364	13.6364	13.6364	0	0	3673
KICH	LCP1	3.0303	66.6667	3.0303	66.6667	0	0	3936
KICH	MMP1	24.2424	13.6364	24.2424	13.6364	0	0	4312
KICH	MMP10	24.2424	13.6364	24.2424	13.6364	0	0	4319
KICH	MMP12	24.2424	13.6364	24.2424	13.6364	0	0	4321
KICH	MMP13	24.2424	13.6364	24.2424	13.6364	0	0	4322
KICH	MMP14	31.8182	3.0303	31.8182	3.0303	0	0	4323
KICH	MMP2	31.8182	7.57576	31.8182	7.57576	0	0	4313
KICH	MMP3	24.2424	13.6364	24.2424	13.6364	0	0	4314
KICH	MMP9	31.8182	4.54545	31.8182	4.54545	0	0	4318
KICH	SERPINE1	37.8788	1.51515	37.8788	1.51515	0	0	5054
KICH	SPP1	34.8485	1.51515	34.8485	1.51515	0	0	6696
KICH	TIMP2	1.51515	72.7273	1.51515	72.7273	0	0	7077
KICH	TNF	3.0303	77.2727	3.0303	77.2727	0	0	7124
KICH	TNFRSF11B	27.2727	13.6364	24.2424	13.6364	3.0303	0	4982
KIRC	FGF2	2.46212	14.3939	2.08333	14.2045	0.378788	0.189394	2247
KIRC	ICAM1	8.90152	2.65152	8.90152	2.46212	0	0.189394	3383
KIRC	ICAM3	8.90152	2.65152	8.90152	2.46212	0	0.189394	3385
KIRC	ITGA2	30.8712	1.51515	30.8712	1.51515	0	0	3673
KIRC	LCP1	3.97727	15.3409	3.78788	15.1515	0.189394	0.189394	3936
KIRC	MMP1	5.87121	4.92424	5.49242	4.92424	0.378788	0	4312
KIRC	MMP10	5.87121	4.92424	5.49242	4.92424	0.378788	0	4319
KIRC	MMP12	5.87121	4.92424	5.49242	4.92424	0.378788	0	4321
KIRC	MMP13	5.87121	4.92424	5.49242	4.92424	0.378788	0	4322
KIRC	MMP14	3.2197	39.2045	3.2197	39.2045	0	0	4323
KIRC	MMP2	18.5606	4.16667	18.5606	4.16667	0	0	4313
KIRC	MMP3	5.87121	4.92424	5.49242	4.92424	0.378788	0	4314
KIRC	MMP9	22.7273	0	22.7273	0	0	0	4318
KIRC	SERPINE1	33.1439	0.189394	32.3864	0.189394	0.757576	0	5054
KIRC	SPP1	2.46212	13.0682	2.27273	13.0682	0.189394	0	6696
KIRC	TIMP2	8.14394	5.11364	7.57576	5.11364	0.568182	0	7077
KIRC	TNF	1.89394	18.9394	1.89394	18.9394	0	0	7124
KIRC	TNFRSF11B	14.5833	10.2273	13.8258	10.2273	0.757576	0	4982
KIRP	FGF2	3.47222	9.375	3.47222	9.375	0	0	2247
KIRP	ICAM1	2.08333	6.25	2.08333	6.25	0	0	3383
KIRP	ICAM3	2.08333	6.25	2.08333	6.25	0	0	3385
KIRP	ITGA2	10.0694	3.47222	10.0694	3.47222	0	0	3673
KIRP	LCP1	10.0694	8.33333	10.0694	8.33333	0	0	3936
KIRP	MMP1	3.47222	10.4167	3.47222	8.68056	0	1.73611	4312
KIRP	MMP10	3.47222	10.4167	3.47222	8.68056	0	1.73611	4319
KIRP	MMP12	3.47222	10.4167	3.47222	8.68056	0	1.73611	4321
KIRP	MMP13	3.47222	10.4167	3.47222	8.68056	0	1.73611	4322
KIRP	MMP14	0.694444	17.3611	0.694444	17.0139	0	0.347222	4323
KIRP	MMP2	52.4306	2.43056	52.4306	2.43056	0	0	4313
KIRP	MMP3	3.47222	10.4167	3.47222	8.68056	0	1.73611	4314
KIRP	MMP9	35.0694	0.347222	35.0694	0.347222	0	0	4318
KIRP	SERPINE1	60.0694	0.694444	59.0278	0.347222	1.04167	0.347222	5054
KIRP	SPP1	3.47222	9.02778	3.47222	9.02778	0	0	6696
KIRP	TIMP2	69.4444	0.347222	68.4028	0.347222	1.04167	0	7077
KIRP	TNF	1.38889	9.72222	1.38889	9.02778	0	0.694444	7124
KIRP	TNFRSF11B	9.375	3.125	9.375	3.125	0	0	4982
LAML	FGF2	2.09424	1.04712	2.09424	1.04712	0	0	2247
LAML	ICAM1	3.14136	1.57068	2.6178	1.57068	0.52356	0	3383
LAML	ICAM3	3.14136	1.57068	2.6178	1.57068	0.52356	0	3385
LAML	ITGA2	0	1.57068	0	1.57068	0	0	3673
LAML	LCP1	3.14136	0.52356	3.14136	0.52356	0	0	3936
LAML	MMP1	4.71204	0	3.66492	0	1.04712	0	4312
LAML	MMP10	4.71204	0	3.66492	0	1.04712	0	4319
LAML	MMP12	4.71204	0	3.66492	0	1.04712	0	4321
LAML	MMP13	4.71204	0	3.66492	0	1.04712	0	4322
LAML	MMP14	1.04712	0.52356	1.04712	0.52356	0	0	4323
LAML	MMP2	0	2.6178	0	2.09424	0	0.52356	4313
LAML	MMP3	4.71204	0	3.66492	0	1.04712	0	4314
LAML	MMP9	0	2.09424	0	1.57068	0	0.52356	4318
LAML	SERPINE1	0	10.4712	0	10.4712	0	0	5054
LAML	SPP1	2.09424	1.04712	2.09424	1.04712	0	0	6696
LAML	TIMP2	2.09424	2.6178	2.09424	2.6178	0	0	7077
LAML	TNF	0.52356	0	0.52356	0	0	0	7124
LAML	TNFRSF11B	12.0419	0.52356	11.5183	0.52356	0.52356	0	4982
LGG	FGF2	1.36452	21.0526	0.974659	20.2729	0.389864	0.779727	2247
LGG	ICAM1	23.3918	3.11891	20.6628	3.11891	2.72904	0	3383
LGG	ICAM3	23.3918	3.31384	20.6628	3.31384	2.72904	0	3385
LGG	ITGA2	1.55945	5.84795	1.55945	5.65302	0	0.194932	3673
LGG	LCP1	0.779727	27.4854	0.389864	25.731	0.389864	1.75439	3936
LGG	MMP1	13.2554	4.09357	12.8655	3.89864	0.389864	0.194932	4312
LGG	MMP10	13.2554	4.09357	12.8655	3.89864	0.389864	0.194932	4319
LGG	MMP12	13.2554	4.09357	12.8655	3.89864	0.389864	0.194932	4321
LGG	MMP13	13.4503	4.2885	12.8655	4.09357	0.584795	0.194932	4322
LGG	MMP14	2.33918	13.2554	0.974659	13.2554	1.36452	0	4323
LGG	MMP2	3.50877	4.2885	3.50877	4.2885	0	0	4313
LGG	MMP3	13.2554	4.09357	12.8655	3.89864	0.389864	0.194932	4314
LGG	MMP9	8.77193	0.974659	8.77193	0.974659	0	0	4318
LGG	SERPINE1	32.3587	0.584795	29.8246	0.584795	2.53411	0	5054
LGG	SPP1	1.36452	18.9084	1.16959	18.7135	0.194932	0.194932	6696
LGG	TIMP2	8.577	2.33918	6.43275	2.33918	2.14425	0	7077
LGG	TNF	2.14425	5.65302	1.36452	5.45809	0.779727	0.194932	7124
LGG	TNFRSF11B	19.2982	1.94932	12.2807	1.94932	7.01754	0	4982
LIHC	FGF2	3.51351	42.1622	3.24324	41.8919	0.27027	0.27027	2247
LIHC	ICAM1	15.1351	22.4324	14.8649	22.1622	0.27027	0.27027	3383
LIHC	ICAM3	14.8649	22.4324	14.5946	22.1622	0.27027	0.27027	3385
LIHC	ITGA2	28.6486	9.45946	28.3784	9.45946	0.27027	0	3673
LIHC	LCP1	3.51351	47.8378	3.51351	45.4054	0	2.43243	3936
LIHC	MMP1	7.83784	22.973	7.2973	22.7027	0.54054	0.27027	4312
LIHC	MMP10	7.83784	22.973	7.2973	22.7027	0.54054	0.27027	4319
LIHC	MMP12	7.2973	22.7027	6.75676	22.4324	0.54054	0.27027	4321
LIHC	MMP13	7.2973	22.7027	6.75676	22.4324	0.54054	0.27027	4322
LIHC	MMP14	10	21.3514	9.45946	21.3514	0.54054	0	4323
LIHC	MMP2	5.40541	39.4595	5.40541	38.9189	0	0.54054	4313
LIHC	MMP3	7.2973	22.7027	6.75676	22.4324	0.54054	0.27027	4314
LIHC	MMP9	31.3514	3.24324	31.0811	3.24324	0.27027	0	4318
LIHC	SERPINE1	31.3514	7.83784	30.5405	7.83784	0.810811	0	5054
LIHC	SPP1	2.16216	45.4054	1.89189	45.1351	0.27027	0.27027	6696
LIHC	TIMP2	37.8378	7.2973	32.1622	7.02703	5.67568	0.27027	7077
LIHC	TNF	40.2703	2.7027	35.9459	2.7027	4.32432	0	7124
LIHC	TNFRSF11B	62.4324	4.86486	44.8649	4.59459	17.5676	0.27027	4982
LUAD	FGF2	8.91473	32.5581	8.91473	32.5581	0	0	2247
LUAD	ICAM1	4.65116	52.1318	4.65116	51.5504	0	0.581395	3383
LUAD	ICAM3	4.84496	51.938	4.84496	51.3566	0	0.581395	3385
LUAD	ITGA2	26.938	28.876	25.969	28.1008	0.968992	0.775194	3673
LUAD	LCP1	8.72093	55.0388	8.72093	53.876	0	1.16279	3936
LUAD	MMP1	26.1628	19.3798	24.2248	18.9922	1.93798	0.387597	4312
LUAD	MMP10	26.1628	19.186	24.2248	18.7984	1.93798	0.387597	4319
LUAD	MMP12	26.1628	19.3798	24.2248	18.9922	1.93798	0.387597	4321
LUAD	MMP13	25.7752	19.5736	24.2248	19.186	1.55039	0.387597	4322
LUAD	MMP14	32.7519	19.7674	30.0388	19.7674	2.71318	0	4323
LUAD	MMP2	20.7364	28.1008	19.9612	27.7132	0.775194	0.387597	4313
LUAD	MMP3	26.1628	19.3798	24.2248	18.9922	1.93798	0.387597	4314
LUAD	MMP9	41.2791	15.6977	40.3101	15.5039	0.968992	0.193798	4318
LUAD	SERPINE1	42.6357	11.0465	39.5349	10.6589	3.10078	0.387597	5054
LUAD	SPP1	9.88372	30.0388	9.88372	30.0388	0	0	6696
LUAD	TIMP2	50.5814	5.81395	47.4806	5.62016	3.10078	0.193798	7077
LUAD	TNF	37.2093	11.8217	35.0775	11.6279	2.13178	0.193798	7124
LUAD	TNFRSF11B	59.1085	5.23256	52.5194	5.23256	6.58915	0	4982
LUSC	FGF2	5.58882	61.2774	5.38922	61.0778	0.199601	0.199601	2247
LUSC	ICAM1	19.5609	38.7226	18.1637	38.7226	1.39721	0	3383
LUSC	ICAM3	19.9601	38.7226	18.5629	38.523	1.39721	0.199601	3385
LUSC	ITGA2	9.78044	68.2635	8.38323	67.4651	1.39721	0.798403	3673
LUSC	LCP1	7.58483	68.0639	7.58483	66.8663	0	1.1976	3936
LUSC	MMP1	22.9541	31.5369	21.9561	30.7385	0.998004	0.798403	4312
LUSC	MMP10	23.1537	31.5369	22.1557	30.7385	0.998004	0.798403	4319
LUSC	MMP12	22.7545	31.7365	21.9561	30.9381	0.798403	0.798403	4321
LUSC	MMP13	22.5549	31.7365	21.7565	30.9381	0.798403	0.798403	4322
LUSC	MMP14	28.3433	34.7305	27.3453	33.7325	0.998004	0.998004	4323
LUSC	MMP2	18.1637	37.3253	17.7645	36.9261	0.399202	0.399202	4313
LUSC	MMP3	22.9541	31.5369	21.9561	30.7385	0.998004	0.798403	4314
LUSC	MMP9	52.2954	9.38124	50.499	9.38124	1.79641	0	4318
LUSC	SERPINE1	50.2994	8.78244	45.7086	8.58283	4.59082	0.199601	5054
LUSC	SPP1	9.18164	55.6886	8.58283	55.2894	0.598802	0.399202	6696
LUSC	TIMP2	45.1098	13.9721	42.1158	13.9721	2.99401	0	7077
LUSC	TNF	24.1517	24.5509	23.5529	24.3513	0.598802	0.199601	7124
LUSC	TNFRSF11B	66.2675	4.59082	60.2794	4.59082	5.98802	0	4982
MESO	FGF2	2.29885	42.5287	2.29885	42.5287	0	0	2247
MESO	ICAM1	18.3908	8.04598	14.9425	8.04598	3.44828	0	3383
MESO	ICAM3	18.3908	8.04598	14.9425	8.04598	3.44828	0	3385
MESO	ITGA2	14.9425	10.3448	14.9425	10.3448	0	0	3673
MESO	LCP1	3.44828	47.1264	3.44828	47.1264	0	0	3936
MESO	MMP1	16.092	11.4943	16.092	11.4943	0	0	4312
MESO	MMP10	16.092	11.4943	16.092	11.4943	0	0	4319
MESO	MMP12	16.092	11.4943	16.092	11.4943	0	0	4321
MESO	MMP13	16.092	12.6437	16.092	12.6437	0	0	4322
MESO	MMP14	2.29885	42.5287	2.29885	42.5287	0	0	4323
MESO	MMP2	16.092	19.5402	16.092	19.5402	0	0	4313
MESO	MMP3	16.092	11.4943	16.092	11.4943	0	0	4314
MESO	MMP9	12.6437	3.44828	12.6437	3.44828	0	0	4318
MESO	SERPINE1	26.4368	2.29885	26.4368	2.29885	0	0	5054
MESO	SPP1	2.29885	43.6782	2.29885	43.6782	0	0	6696
MESO	TIMP2	24.1379	6.89655	19.5402	6.89655	4.5977	0	7077
MESO	TNF	9.1954	11.4943	9.1954	11.4943	0	0	7124
MESO	TNFRSF11B	16.092	8.04598	14.9425	6.89655	1.14943	1.14943	4982
OV	FGF2	6.56304	68.2211	5.69948	67.3575	0.863558	0.863558	2247
OV	ICAM1	40.5872	32.6425	29.8791	32.1244	10.7081	0.518135	3383
OV	ICAM3	39.5509	33.6788	29.0155	33.1606	10.5354	0.518135	3385
OV	ITGA2	13.8169	46.9775	12.2625	44.3869	1.5544	2.59067	3673
OV	LCP1	11.2263	62.3489	10.8808	60.4491	0.345423	1.89983	3936
OV	MMP1	33.8515	26.4249	26.943	25.734	6.90846	0.690846	4312
OV	MMP10	33.8515	26.5976	26.943	25.9067	6.90846	0.690846	4319
OV	MMP12	33.506	26.4249	26.7703	25.734	6.73575	0.690846	4321
OV	MMP13	33.3333	26.4249	26.5976	25.734	6.73575	0.690846	4322
OV	MMP14	21.0708	32.6425	18.4801	31.7789	2.59067	0.863558	4323
OV	MMP2	7.94473	67.1848	7.59931	66.3212	0.345423	0.863558	4313
OV	MMP3	33.8515	26.4249	26.943	25.734	6.90846	0.690846	4314
OV	MMP9	60.6218	6.56304	54.9223	6.56304	5.69948	0	4318
OV	SERPINE1	44.0415	12.6079	39.3782	12.6079	4.66321	0	5054
OV	SPP1	6.90846	65.8031	6.73575	64.4214	0.172712	1.38169	6696
OV	TIMP2	35.7513	34.5423	29.361	34.1969	6.39033	0.345423	7077
OV	TNF	46.6321	17.4439	40.2418	17.4439	6.39033	0	7124
OV	TNFRSF11B	72.0207	7.08117	41.6235	6.56304	30.3972	0.518135	4982
PAAD	FGF2	4.8913	15.7609	4.8913	15.7609	0	0	2247
PAAD	ICAM1	8.15217	14.6739	8.15217	14.6739	0	0	3383
PAAD	ICAM3	8.15217	14.6739	8.15217	14.6739	0	0	3385
PAAD	ITGA2	7.06522	14.6739	7.06522	14.6739	0	0	3673
PAAD	LCP1	15.7609	10.8696	15.7609	10.8696	0	0	3936
PAAD	MMP1	10.3261	9.23913	9.78261	9.23913	0.543478	0	4312
PAAD	MMP10	10.3261	9.23913	9.78261	9.23913	0.543478	0	4319
PAAD	MMP12	10.3261	8.69565	9.78261	8.69565	0.543478	0	4321
PAAD	MMP13	10.8696	8.69565	9.78261	8.69565	1.08696	0	4322
PAAD	MMP14	16.3043	9.23913	15.7609	9.23913	0.543478	0	4323
PAAD	MMP2	12.5	6.52174	11.9565	6.52174	0.543478	0	4313
PAAD	MMP3	10.3261	9.23913	9.78261	9.23913	0.543478	0	4314
PAAD	MMP9	25.5435	2.17391	25.5435	2.17391	0	0	4318
PAAD	SERPINE1	27.7174	4.8913	25	4.8913	2.71739	0	5054
PAAD	SPP1	4.8913	15.2174	4.34783	15.2174	0.543478	0	6696
PAAD	TIMP2	13.0435	21.1957	11.9565	21.1957	1.08696	0	7077
PAAD	TNF	7.6087	32.0652	4.8913	32.0652	2.71739	0	7124
PAAD	TNFRSF11B	38.0435	3.26087	29.8913	3.26087	8.15217	0	4982
PCPG	FGF2	2.46914	6.79012	2.46914	6.79012	0	0	2247
PCPG	ICAM1	13.5802	0.617284	12.963	0.617284	0.617284	0	3383
PCPG	ICAM3	12.963	0.617284	12.3457	0.617284	0.617284	0	3385
PCPG	ITGA2	3.7037	6.79012	3.7037	5.55556	0	1.23457	3673
PCPG	LCP1	6.17284	4.32099	5.55556	4.32099	0.617284	0	3936
PCPG	MMP1	1.23457	27.1605	1.23457	27.1605	0	0	4312
PCPG	MMP10	1.23457	27.1605	1.23457	27.1605	0	0	4319
PCPG	MMP12	1.23457	27.1605	1.23457	27.1605	0	0	4321
PCPG	MMP13	1.23457	27.1605	1.23457	27.1605	0	0	4322
PCPG	MMP14	1.85185	12.963	1.85185	12.963	0	0	4323
PCPG	MMP2	3.7037	3.7037	3.7037	3.7037	0	0	4313
PCPG	MMP3	1.23457	27.1605	1.23457	27.1605	0	0	4314
PCPG	MMP9	6.79012	1.85185	6.17284	1.85185	0.617284	0	4318
PCPG	SERPINE1	12.963	5.55556	12.3457	5.55556	0.617284	0	5054
PCPG	SPP1	2.46914	6.79012	1.85185	6.79012	0.617284	0	6696
PCPG	TIMP2	6.79012	8.02469	5.55556	8.02469	1.23457	0	7077
PCPG	TNF	8.64198	1.23457	8.02469	1.23457	0.617284	0	7124
PCPG	TNFRSF11B	9.25926	8.02469	8.02469	8.02469	1.23457	0	4982
PRAD	FGF2	3.25203	8.53659	3.25203	5.4878	0	3.04878	2247
PRAD	ICAM1	1.82927	5.28455	1.82927	5.28455	0	0	3383
PRAD	ICAM3	1.82927	5.28455	1.62602	5.28455	0.203252	0	3385
PRAD	ITGA2	2.03252	15.8537	1.82927	11.9919	0.203252	3.86179	3673
PRAD	LCP1	1.42276	45.7317	1.42276	28.4553	0	17.2764	3936
PRAD	MMP1	7.31707	4.87805	7.11382	3.86179	0.203252	1.01626	4312
PRAD	MMP10	7.31707	4.87805	7.11382	3.86179	0.203252	1.01626	4319
PRAD	MMP12	7.11382	4.87805	6.91057	3.86179	0.203252	1.01626	4321
PRAD	MMP13	7.11382	4.87805	6.91057	3.86179	0.203252	1.01626	4322
PRAD	MMP14	1.82927	7.11382	1.82927	6.50407	0	0.609756	4323
PRAD	MMP2	1.82927	23.7805	1.62602	21.5447	0.203252	2.23577	4313
PRAD	MMP3	7.11382	4.87805	6.91057	3.86179	0.203252	1.01626	4314
PRAD	MMP9	7.72358	2.64228	7.31707	2.23577	0.406504	0.406504	4318
PRAD	SERPINE1	19.9187	2.03252	19.1057	1.42276	0.813008	0.609756	5054
PRAD	SPP1	3.04878	5.0813	2.64228	4.47154	0.406504	0.609756	6696
PRAD	TIMP2	3.86179	6.09756	2.84553	5.89431	1.01626	0.203252	7077
PRAD	TNF	3.86179	4.6748	3.65854	4.26829	0.203252	0.406504	7124
PRAD	TNFRSF11B	30.8943	1.01626	25.2033	0.813008	5.69106	0.203252	4982
READ	FGF2	4.84848	42.4242	4.84848	42.4242	0	0	2247
READ	ICAM1	20	17.5758	20	17.5758	0	0	3383
READ	ICAM3	20	17.5758	20	17.5758	0	0	3385
READ	ITGA2	12.7273	26.6667	12.1212	26.6667	0.606061	0	3673
READ	LCP1	70.9091	4.84848	67.2727	4.84848	3.63636	0	3936
READ	MMP1	16.9697	21.2121	16.9697	20.6061	0	0.606061	4312
READ	MMP10	16.9697	21.2121	16.9697	20.6061	0	0.606061	4319
READ	MMP12	16.9697	21.2121	16.9697	20.6061	0	0.606061	4321
READ	MMP13	16.9697	21.2121	16.9697	20.6061	0	0.606061	4322
READ	MMP14	5.45455	40.6061	5.45455	40.6061	0	0	4323
READ	MMP2	24.8485	9.09091	24.8485	9.09091	0	0	4313
READ	MMP3	16.9697	21.2121	16.9697	20.6061	0	0.606061	4314
READ	MMP9	89.0909	0	80.6061	0	8.48485	0	4318
READ	SERPINE1	51.5152	1.81818	50.9091	1.81818	0.606061	0	5054
READ	SPP1	3.0303	40	3.0303	40	0	0	6696
READ	TIMP2	21.8182	13.9394	21.8182	13.9394	0	0	7077
READ	TNF	27.8788	10.303	27.2727	10.303	0.606061	0	7124
READ	TNFRSF11B	65.4545	3.0303	58.7879	3.0303	6.66667	0	4982
SARC	FGF2	17.8988	24.5136	16.7315	23.7354	1.16732	0.77821	2247
SARC	ICAM1	42.0233	10.1167	35.7977	10.1167	6.22568	0	3383
SARC	ICAM3	42.0233	10.1167	36.1868	10.1167	5.83658	0	3385
SARC	ITGA2	28.7938	14.3969	27.2374	14.3969	1.55642	0	3673
SARC	LCP1	2.72374	66.1479	2.33463	64.2023	0.389105	1.94553	3936
SARC	MMP1	12.8405	37.7432	10.8949	35.7977	1.94553	1.94553	4312
SARC	MMP10	13.2296	37.3541	10.8949	35.4086	2.33463	1.94553	4319
SARC	MMP12	13.2296	37.3541	10.8949	35.4086	2.33463	1.94553	4321
SARC	MMP13	13.2296	37.7432	11.284	35.7977	1.94553	1.94553	4322
SARC	MMP14	29.1829	21.0117	27.2374	21.0117	1.94553	0	4323
SARC	MMP2	7.00389	52.1401	6.61479	51.751	0.389105	0.389105	4313
SARC	MMP3	13.2296	37.3541	10.8949	35.4086	2.33463	1.94553	4314
SARC	MMP9	37.3541	6.22568	36.1868	6.22568	1.16732	0	4318
SARC	SERPINE1	26.8482	16.7315	25.2918	16.7315	1.55642	0	5054
SARC	SPP1	19.0661	22.179	18.2879	21.7899	0.77821	0.389105	6696
SARC	TIMP2	28.4047	18.2879	23.3463	18.2879	5.05837	0	7077
SARC	TNF	21.7899	27.2374	21.0117	27.2374	0.77821	0	7124
SARC	TNFRSF11B	31.5175	17.5097	27.2374	17.1206	4.28016	0.389105	4982
SKCM	FGF2	12.8065	25.8856	12.2616	25.8856	0.544959	0	2247
SKCM	ICAM1	16.3488	22.3433	16.0763	22.3433	0.27248	0	3383
SKCM	ICAM3	16.0763	22.6158	15.8038	22.3433	0.27248	0.27248	3385
SKCM	ITGA2	15.2589	25.3406	14.4414	25.3406	0.817439	0	3673
SKCM	LCP1	25.0681	24.5232	25.0681	24.2507	0	0.27248	3936
SKCM	MMP1	10.3542	45.7766	8.44687	44.6866	1.90736	1.08992	4312
SKCM	MMP10	10.3542	45.7766	8.44687	44.6866	1.90736	1.08992	4319
SKCM	MMP12	10.0817	46.049	8.17439	44.9591	1.90736	1.08992	4321
SKCM	MMP13	10.0817	46.3215	8.17439	45.2316	1.90736	1.08992	4322
SKCM	MMP14	11.7166	30.5177	10.8992	30.5177	0.817439	0	4323
SKCM	MMP2	11.1717	32.6975	11.1717	31.6076	0	1.08992	4313
SKCM	MMP3	10.0817	46.049	8.17439	44.9591	1.90736	1.08992	4314
SKCM	MMP9	50.1362	2.17984	48.7738	2.17984	1.3624	0	4318
SKCM	SERPINE1	54.7684	6.81199	52.861	6.81199	1.90736	0	5054
SKCM	SPP1	12.2616	24.5232	12.2616	23.9782	0	0.544959	6696
SKCM	TIMP2	35.1499	11.4441	29.9728	11.4441	5.17711	0	7077
SKCM	TNF	51.4986	8.44687	46.8665	8.44687	4.63215	0	7124
SKCM	TNFRSF11B	50.4087	5.99455	44.9591	5.99455	5.44959	0	4982
STAD	FGF2	4.30839	38.5488	4.08163	38.0952	0.226757	0.453515	2247
STAD	ICAM1	9.97732	30.839	9.52381	29.932	0.453515	0.90703	3383
STAD	ICAM3	10.4308	30.3855	9.97732	29.4785	0.453515	0.90703	3385
STAD	ITGA2	8.61678	31.5193	7.93651	30.3855	0.680272	1.13379	3673
STAD	LCP1	38.322	10.6576	35.6009	10.2041	2.72109	0.453515	3936
STAD	MMP1	17.4603	18.5941	16.0998	17.6871	1.36054	0.90703	4312
STAD	MMP10	17.4603	18.5941	16.0998	17.6871	1.36054	0.90703	4319
STAD	MMP12	17.0068	18.5941	15.6463	17.6871	1.36054	0.90703	4321
STAD	MMP13	16.3265	18.5941	15.6463	17.6871	0.680272	0.90703	4322
STAD	MMP14	11.7914	25.1701	11.3379	24.0363	0.453515	1.13379	4323
STAD	MMP2	10.6576	28.1179	10.6576	26.9841	0	1.13379	4313
STAD	MMP3	17.0068	18.5941	15.6463	17.6871	1.36054	0.90703	4314
STAD	MMP9	65.7596	0.453515	59.4104	0.453515	6.34921	0	4318
STAD	SERPINE1	43.3107	8.84354	38.7755	8.61678	4.53515	0.226757	5054
STAD	SPP1	4.98866	40.8163	4.7619	40.1361	0.226757	0.680272	6696
STAD	TIMP2	20.6349	17.6871	19.0476	17.4603	1.5873	0.226757	7077
STAD	TNF	23.1293	12.4717	20.8617	11.3379	2.26757	1.13379	7124
STAD	TNFRSF11B	66.2132	2.26757	58.0499	2.26757	8.16327	0	4982
TGCT	FGF2	0	73.3333	0	73.3333	0	0	2247
TGCT	ICAM1	25.3333	31.3333	25.3333	31.3333	0	0	3383
TGCT	ICAM3	25.3333	31.3333	25.3333	31.3333	0	0	3385
TGCT	ITGA2	2.66667	68.6667	2.66667	68.6667	0	0	3673
TGCT	LCP1	0	76.6667	0	76.6667	0	0	3936
TGCT	MMP1	2	79.3333	2	75.3333	0	4	4312
TGCT	MMP10	2	79.3333	2	75.3333	0	4	4319
TGCT	MMP12	2	79.3333	2	75.3333	0	4	4321
TGCT	MMP13	2	79.3333	2	75.3333	0	4	4322
TGCT	MMP14	34	13.3333	33.3333	13.3333	0.666667	0	4323
TGCT	MMP2	12	34	11.3333	34	0.666667	0	4313
TGCT	MMP3	2	79.3333	2	75.3333	0	4	4314
TGCT	MMP9	28.6667	8.66667	28.6667	8.66667	0	0	4318
TGCT	SERPINE1	73.3333	2.66667	72.6667	2.66667	0.666667	0	5054
TGCT	SPP1	0	73.3333	0	73.3333	0	0	6696
TGCT	TIMP2	38	6.66667	38	6.66667	0	0	7077
TGCT	TNF	18.6667	10	18.6667	10	0	0	7124
TGCT	TNFRSF11B	70.6667	4.66667	70	4.66667	0.666667	0	4982
THCA	FGF2	1.002	0.400802	1.002	0.400802	0	0	2247
THCA	ICAM1	1.40281	1.40281	1.40281	1.2024	0	0.200401	3383
THCA	ICAM3	1.40281	1.40281	1.40281	1.2024	0	0.200401	3385
THCA	ITGA2	3.60721	0	3.60721	0	0	0	3673
THCA	LCP1	1.002	3.60721	1.002	3.00601	0	0.601202	3936
THCA	MMP1	1.002	1.80361	1.002	1.80361	0	0	4312
THCA	MMP10	1.002	1.80361	1.002	1.80361	0	0	4319
THCA	MMP12	1.002	1.80361	1.002	1.80361	0	0	4321
THCA	MMP13	1.002	1.80361	1.002	1.80361	0	0	4322
THCA	MMP14	2.20441	0.200401	2.20441	0.200401	0	0	4323
THCA	MMP2	2.60521	0.400802	2.60521	0.400802	0	0	4313
THCA	MMP3	1.002	1.80361	1.002	1.80361	0	0	4314
THCA	MMP9	2.40481	0	2.40481	0	0	0	4318
THCA	SERPINE1	4.00802	0.200401	4.00802	0	0	0.200401	5054
THCA	SPP1	1.002	0.400802	1.002	0.400802	0	0	6696
THCA	TIMP2	4.20842	0.200401	3.60721	0.200401	0.601202	0	7077
THCA	TNF	0.400802	0.801603	0.400802	0.801603	0	0	7124
THCA	TNFRSF11B	1.40281	1.002	1.40281	0.801603	0	0.200401	4982
THYM	FGF2	1.62602	3.25203	1.62602	3.25203	0	0	2247
THYM	ICAM1	2.43902	3.25203	2.43902	3.25203	0	0	3383
THYM	ICAM3	2.43902	3.25203	2.43902	3.25203	0	0	3385
THYM	ITGA2	8.13008	0.813008	8.13008	0.813008	0	0	3673
THYM	LCP1	0.813008	11.3821	0.813008	11.3821	0	0	3936
THYM	MMP1	0.813008	5.69106	0.813008	5.69106	0	0	4312
THYM	MMP10	0.813008	5.69106	0.813008	5.69106	0	0	4319
THYM	MMP12	0.813008	6.50407	0.813008	5.69106	0	0.813008	4321
THYM	MMP13	0.813008	6.50407	0.813008	5.69106	0	0.813008	4322
THYM	MMP14	11.3821	1.62602	10.5691	1.62602	0.813008	0	4323
THYM	MMP2	1.62602	10.5691	1.62602	10.5691	0	0	4313
THYM	MMP3	0.813008	6.50407	0.813008	5.69106	0	0.813008	4314
THYM	MMP9	8.13008	0.813008	8.13008	0.813008	0	0	4318
THYM	SERPINE1	13.0081	1.62602	13.0081	1.62602	0	0	5054
THYM	SPP1	1.62602	3.25203	1.62602	3.25203	0	0	6696
THYM	TIMP2	8.13008	3.25203	8.13008	3.25203	0	0	7077
THYM	TNF	0	16.2602	0	16.2602	0	0	7124
THYM	TNFRSF11B	8.94309	2.43902	8.13008	2.43902	0.813008	0	4982
UCEC	FGF2	1.48423	20.2226	1.48423	19.666	0	0.556586	2247
UCEC	ICAM1	14.2857	13.1725	8.90538	12.8015	5.38033	0.371057	3383
UCEC	ICAM3	14.2857	13.1725	8.90538	12.8015	5.38033	0.371057	3385
UCEC	ITGA2	4.82375	17.8108	4.45269	17.0686	0.371057	0.742115	3673
UCEC	LCP1	6.12245	19.295	5.93692	19.1095	0.185529	0.185529	3936
UCEC	MMP1	6.86456	14.2857	6.12245	13.5436	0.742115	0.742115	4312
UCEC	MMP10	7.05009	14.2857	6.30798	13.5436	0.742115	0.742115	4319
UCEC	MMP12	6.49351	14.2857	5.93692	13.5436	0.556586	0.742115	4321
UCEC	MMP13	6.30798	14.6568	5.75139	13.9147	0.556586	0.742115	4322
UCEC	MMP14	10.0186	10.7607	8.90538	10.5751	1.11317	0.185529	4323
UCEC	MMP2	3.33952	26.3451	2.5974	25.7885	0.742115	0.556586	4313
UCEC	MMP3	6.67904	14.2857	5.93692	13.5436	0.742115	0.742115	4314
UCEC	MMP9	26.5306	2.22635	23.3766	2.22635	3.15399	0	4318
UCEC	SERPINE1	15.7699	7.97774	15.0278	7.97774	0.742115	0	5054
UCEC	SPP1	2.41187	18.5529	2.22635	18.3673	0.185529	0.185529	6696
UCEC	TIMP2	16.3265	10.3896	14.4712	10.3896	1.85529	0	7077
UCEC	TNF	18.9239	2.5974	17.0686	2.5974	1.85529	0	7124
UCEC	TNFRSF11B	34.8794	3.15399	29.3135	3.15399	5.56586	0	4982
UCS	FGF2	7.14286	66.0714	7.14286	66.0714	0	0	2247
UCS	ICAM1	33.9286	39.2857	25	39.2857	8.92857	0	3383
UCS	ICAM3	33.9286	39.2857	23.2143	39.2857	10.7143	0	3385
UCS	ITGA2	16.0714	32.1429	16.0714	32.1429	0	0	3673
UCS	LCP1	26.7857	51.7857	26.7857	50	0	1.78571	3936
UCS	MMP1	19.6429	46.4286	17.8571	46.4286	1.78571	0	4312
UCS	MMP10	19.6429	46.4286	17.8571	46.4286	1.78571	0	4319
UCS	MMP12	17.8571	48.2143	16.0714	46.4286	1.78571	1.78571	4321
UCS	MMP13	17.8571	48.2143	16.0714	46.4286	1.78571	1.78571	4322
UCS	MMP14	21.4286	48.2143	21.4286	48.2143	0	0	4323
UCS	MMP2	12.5	66.0714	12.5	66.0714	0	0	4313
UCS	MMP3	19.6429	46.4286	17.8571	44.6429	1.78571	1.78571	4314
UCS	MMP9	83.9286	3.57143	69.6429	3.57143	14.2857	0	4318
UCS	SERPINE1	39.2857	25	35.7143	25	3.57143	0	5054
UCS	SPP1	5.35714	67.8571	5.35714	67.8571	0	0	6696
UCS	TIMP2	51.7857	19.6429	48.2143	19.6429	3.57143	0	7077
UCS	TNF	60.7143	8.92857	58.9286	8.92857	1.78571	0	7124
UCS	TNFRSF11B	71.4286	10.7143	57.1429	10.7143	14.2857	0	4982
UVM	FGF2	5	5	5	5	0	0	2247
UVM	ICAM1	5	5	3.75	5	1.25	0	3383
UVM	ICAM3	3.75	5	2.5	5	1.25	0	3385
UVM	ITGA2	3.75	3.75	3.75	3.75	0	0	3673
UVM	LCP1	7.5	3.75	7.5	3.75	0	0	3936
UVM	MMP1	12.5	1.25	12.5	1.25	0	0	4312
UVM	MMP10	12.5	1.25	12.5	1.25	0	0	4319
UVM	MMP12	12.5	1.25	12.5	1.25	0	0	4321
UVM	MMP13	12.5	1.25	12.5	1.25	0	0	4322
UVM	MMP14	3.75	1.25	3.75	1.25	0	0	4323
UVM	MMP2	1.25	20	1.25	18.75	0	1.25	4313
UVM	MMP3	12.5	1.25	12.5	1.25	0	0	4314
UVM	MMP9	11.25	0	11.25	0	0	0	4318
UVM	SERPINE1	8.75	0	8.75	0	0	0	5054
UVM	SPP1	3.75	5	3.75	5	0	0	6696
UVM	TIMP2	17.5	0	15	0	2.5	0	7077
UVM	TNF	53.75	0	46.25	0	7.5	0	7124
UVM	TNFRSF11B	76.25	0	58.75	0	17.5	0	4982
