# Supplementary material for: Pan-cancer analyses of senescence-related genes in extracellular matrix characterization in cancer
Source: Discov Oncol. 2023 Nov 20;14:208. doi: 10.1007/s12672-023-00828-7 (PMC10660488; doi:10.1007/s12672-023-00828-7)
Supplement: Supplementary file 19 — Supplementary file19 (XLSX 35 KB) [file 12672_2023_828_MOESM19_ESM.xlsx]

## Sheet: SheetName
Table S14 The detailed information about the correlations between CNV and mRNA expression in pan-cancer
cancertype	symbol	spm	fdr	entrez
ACC	FGF2	0.235531	0.143367	2247
ACC	ICAM1	-0.362279	0.0108462	3383
ACC	ICAM3	0.0834845	0.714181	3385
ACC	ITGA2	0.0979053	0.646352	3673
ACC	LCP1	0.212628	0.201715	3936
ACC	MMP1	0.117083	0.562857	4312
ACC	MMP10	-0.0586945	0.818012	4319
ACC	MMP12	0.135495	0.482456	4321
ACC	MMP13	0.189401	0.273083	4322
ACC	MMP14	0.0842639	0.710759	4323
ACC	MMP2	0.124998	0.528639	4313
ACC	MMP3	0.0555728	0.829858	4314
ACC	MMP9	0.0977739	0.646799	4318
ACC	SERPINE1	0.238301	0.137079	5054
ACC	SPP1	-0.0655001	0.789219	6696
ACC	TIMP2	0.246576	0.120065	7077
ACC	TNF	0.0648999	0.791798	7124
ACC	TNFRSF11B	0.0447085	0.871391	4982
BLCA	FGF2	0.0726941	0.250479	2247
BLCA	ICAM1	-0.051681	0.443377	3383
BLCA	ICAM3	0.270031	2.03523e-07	3385
BLCA	ITGA2	0.218115	4.1313e-05	3673
BLCA	LCP1	0.051418	0.445371	3936
BLCA	MMP1	0.0687475	0.282519	4312
BLCA	MMP10	-0.00948407	0.907686	4319
BLCA	MMP12	0.0498673	0.461881	4321
BLCA	MMP13	0.0561224	0.398239	4322
BLCA	MMP14	0.217749	4.2673e-05	4323
BLCA	MMP2	0.191478	0.000394928	4313
BLCA	MMP3	0.077984	0.211149	4314
BLCA	MMP9	-0.0415065	0.54991	4318
BLCA	SERPINE1	-0.0366153	0.6047	5054
BLCA	SPP1	-0.147858	0.00829052	6696
BLCA	TIMP2	-0.0551336	0.407628	7077
BLCA	TNF	0.139619	0.0134627	7124
BLCA	TNFRSF11B	0.0143603	0.854701	4982
BRCA	FGF2	0.0267648	0.466689	2247
BRCA	ICAM1	0.200028	1.30212e-10	3383
BRCA	ICAM3	0.20776	2.245e-11	3385
BRCA	ITGA2	0.216104	3.08151e-12	3673
BRCA	LCP1	0.153154	1.27839e-06	3936
BRCA	MMP1	0.0905279	0.00582677	4312
BRCA	MMP10	0.00805433	0.84217	4319
BRCA	MMP12	0.10903	0.000754633	4321
BRCA	MMP13	0.0666211	0.0478828	4322
BRCA	MMP14	0.0710648	0.0338486	4323
BRCA	MMP2	0.055558	0.104716	4313
BRCA	MMP3	0.0900019	0.0061414	4314
BRCA	MMP9	0.0584531	0.0864302	4318
BRCA	SERPINE1	-0.00589969	0.884231	5054
BRCA	SPP1	-0.0228425	0.539248	6696
BRCA	TIMP2	-0.035013	0.328797	7077
BRCA	TNF	0.140076	1.0556e-05	7124
BRCA	TNFRSF11B	-0.101005	0.00191111	4982
CESC	FGF2	0.0113459	0.913676	2247
CESC	ICAM1	0.139111	0.0455787	3383
CESC	ICAM3	0.224924	0.000479691	3385
CESC	ITGA2	0.191913	0.00359011	3673
CESC	LCP1	-0.057393	0.483661	3936
CESC	MMP1	0.296976	1.73767e-06	4312
CESC	MMP10	0.254894	5.6777e-05	4319
CESC	MMP12	0.0761658	0.326985	4321
CESC	MMP13	0.128028	0.069623	4322
CESC	MMP14	0.265631	2.46e-05	4323
CESC	MMP2	0.137575	0.0484963	4313
CESC	MMP3	0.187689	0.00453529	4314
CESC	MMP9	-0.0748871	0.336474	4318
CESC	SERPINE1	-0.0248245	0.795131	5054
CESC	SPP1	0.0488837	0.562117	6696
CESC	TIMP2	0.163969	0.0153004	7077
CESC	TNF	0.202168	0.0019961	7124
CESC	TNFRSF11B	-0.00697054	0.948873	4982
CHOL	FGF2	0.154331	0.813013	2247
CHOL	ICAM1	0.18018	0.762184	3383
CHOL	ICAM3	-0.136165	0.845446	3385
CHOL	ITGA2	0.161411	0.799293	3673
CHOL	LCP1	-0.0517441	0.97046	3936
CHOL	MMP1	0.362279	0.29176	4312
CHOL	MMP10	-0.0350177	0.982525	4319
CHOL	MMP12	0.252398	0.574376	4321
CHOL	MMP13	0.293875	0.471357	4322
CHOL	MMP14	0.360322	0.29625	4323
CHOL	MMP2	0.12129	0.86991	4313
CHOL	MMP3	0.193521	0.726779	4314
CHOL	MMP9	0.0371991	0.981671	4318
CHOL	SERPINE1	-0.151509	0.816906	5054
CHOL	SPP1	0.466302	0.10887	6696
CHOL	TIMP2	0.315776	0.409138	7077
CHOL	TNF	-0.0186735	0.990009	7124
CHOL	TNFRSF11B	0.287314	0.488808	4982
COAD	FGF2	-0.0109363	0.930723	2247
COAD	ICAM1	0.0378954	0.725717	3383
COAD	ICAM3	0.20621	0.0021531	3385
COAD	ITGA2	0.301352	2.15417e-06	3673
COAD	LCP1	-0.171703	0.0136247	3936
COAD	MMP1	0.0647741	0.481814	4312
COAD	MMP10	-0.010676	0.932784	4319
COAD	MMP12	0.0604725	0.521983	4321
COAD	MMP13	-0.00310671	0.981587	4322
COAD	MMP14	0.170025	0.014815	4323
COAD	MMP2	0.0331093	0.768858	4313
COAD	MMP3	0.0220359	0.854502	4314
COAD	MMP9	-0.092966	0.257399	4318
COAD	SERPINE1	-0.08127	0.342409	5054
COAD	SPP1	-0.00621114	0.962355	6696
COAD	TIMP2	-0.0756802	0.387628	7077
COAD	TNF	0.0812291	0.342637	7124
COAD	TNFRSF11B	0.188118	0.00597333	4982
DLBC	FGF2	0.067667	1	2247
DLBC	ICAM1	0.268871	1	3383
DLBC	ICAM3	0.375431	0.901773	3385
DLBC	ITGA2	0.0203633	1	3673
DLBC	LCP1	0.107338	1	3936
DLBC	MMP1	0.260995	1	4312
DLBC	MMP10	0.288474	1	4319
DLBC	MMP12	-0.00912721	1	4321
DLBC	MMP13	0.121326	1	4322
DLBC	MMP14	0.0387184	1	4323
DLBC	MMP2	0.261578	1	4313
DLBC	MMP3	0.204232	1	4314
DLBC	MMP9	0.153136	1	4318
DLBC	SERPINE1	-0.27795	1	5054
DLBC	SPP1	0.341561	0.982041	6696
DLBC	TIMP2	0.136519	1	7077
DLBC	TNF	-0.0189048	1	7124
DLBC	TNFRSF11B	0.0718009	1	4982
ESCA	FGF2	0.198943	0.0207614	2247
ESCA	ICAM1	0.177501	0.0430257	3383
ESCA	ICAM3	0.124728	0.18407	3385
ESCA	ITGA2	0.294485	0.000261541	3673
ESCA	LCP1	-0.111514	0.244543	3936
ESCA	MMP1	0.0989347	0.31369	4312
ESCA	MMP10	0.0840087	0.406173	4319
ESCA	MMP12	0.0368955	0.749552	4321
ESCA	MMP13	-0.132172	0.154244	4322
ESCA	MMP14	0.351306	7.86546e-06	4323
ESCA	MMP2	0.268462	0.00104056	4313
ESCA	MMP3	0.08535	0.397412	4314
ESCA	MMP9	-0.109275	0.25626	4318
ESCA	SERPINE1	0.188646	0.0297755	5054
ESCA	SPP1	-0.192873	0.0257034	6696
ESCA	TIMP2	0.0481216	0.666468	7077
ESCA	TNF	0.00845611	0.949038	7124
ESCA	TNFRSF11B	-0.176651	0.0441875	4982
GBM	FGF2	0.183983	0.119457	2247
GBM	ICAM1	0.0609567	0.753155	3383
GBM	ICAM3	0.184897	0.116786	3385
GBM	ITGA2	0.0444182	0.841781	3673
GBM	LCP1	-0.0433449	0.845375	3936
GBM	MMP1	0.00932754	0.976333	4312
GBM	MMP10	0.0132798	0.964392	4319
GBM	MMP12	0.000186912	0.999559	4321
GBM	MMP13	0.00489916	0.987904	4322
GBM	MMP14	0.248825	0.0196093	4323
GBM	MMP2	0.0470728	0.82846	4313
GBM	MMP3	0.0397866	0.860948	4314
GBM	MMP9	0.0736277	0.672927	4318
GBM	SERPINE1	-0.0249593	0.923955	5054
GBM	SPP1	0.00351675	0.989652	6696
GBM	TIMP2	0.191152	0.100181	7077
GBM	TNF	-0.0489243	0.818685	7124
GBM	TNFRSF11B	-0.0863912	0.596673	4982
HNSC	FGF2	-0.0182301	0.780769	2247
HNSC	ICAM1	0.176686	0.000198028	3383
HNSC	ICAM3	0.225665	1.12164e-06	3385
HNSC	ITGA2	0.17034	0.000352229	3673
HNSC	LCP1	0.114359	0.0223536	3936
HNSC	MMP1	0.28921	1.80445e-10	4312
HNSC	MMP10	0.319225	1.25287e-12	4319
HNSC	MMP12	0.024912	0.694088	4321
HNSC	MMP13	0.221224	1.8896e-06	4322
HNSC	MMP14	0.23395	4.0855e-07	4323
HNSC	MMP2	0.247448	7.30219e-08	4313
HNSC	MMP3	0.229903	6.71097e-07	4314
HNSC	MMP9	0.105832	0.0365355	4318
HNSC	SERPINE1	0.209154	7.37476e-06	5054
HNSC	SPP1	0.00250536	0.973047	6696
HNSC	TIMP2	0.0646664	0.236678	7077
HNSC	TNF	0.182261	0.000117571	7124
HNSC	TNFRSF11B	-0.114676	0.0219402	4982
KICH	FGF2	-0.15921	0.561484	2247
KICH	ICAM1	-0.0789419	0.84893	3383
KICH	ICAM3	0.39686	0.0228021	3385
KICH	ITGA2	-0.0115496	0.98998	3673
KICH	LCP1	0.327307	0.082614	3936
KICH	MMP1	0.0198276	0.976489	4312
KICH	MMP10	0.00789748	0.994459	4319
KICH	MMP12	-0.122828	0.704961	4321
KICH	MMP13	0.200827	0.404104	4322
KICH	MMP14	-0.153567	0.583161	4323
KICH	MMP2	-0.0622631	0.897784	4313
KICH	MMP3	-0.0513161	0.921937	4314
KICH	MMP9	0.00106481	0.999505	4318
KICH	SERPINE1	-0.0984654	0.788313	5054
KICH	SPP1	-0.194083	0.428219	6696
KICH	TIMP2	0.425914	0.0126641	7077
KICH	TNF	0.430684	0.011505	7124
KICH	TNFRSF11B	-0.0246576	0.968677	4982
KIRC	FGF2	0.0371465	0.604047	2247
KIRC	ICAM1	-0.0701928	0.244168	3383
KIRC	ICAM3	0.101804	0.0647803	3385
KIRC	ITGA2	0.185126	0.000192605	3673
KIRC	LCP1	-0.0405735	0.561359	3936
KIRC	MMP1	0.0702738	0.243364	4312
KIRC	MMP10	0.0133004	0.877652	4319
KIRC	MMP12	-0.0175255	0.832614	4321
KIRC	MMP13	0.0251018	0.748376	4322
KIRC	MMP14	0.177267	0.000389739	4323
KIRC	MMP2	-0.0164861	0.844158	4313
KIRC	MMP3	0.044147	0.518575	4314
KIRC	MMP9	0.261107	3.62029e-08	4318
KIRC	SERPINE1	0.106223	0.0519779	5054
KIRC	SPP1	0.0313784	0.673442	6696
KIRC	TIMP2	0.118564	0.026316	7077
KIRC	TNF	0.0682811	0.2601	7124
KIRC	TNFRSF11B	0.110106	0.0423367	4982
KIRP	FGF2	0.109425	0.174189	2247
KIRP	ICAM1	0.200495	0.00427421	3383
KIRP	ICAM3	0.203357	0.00367524	3385
KIRP	ITGA2	0.0187269	0.878127	3673
KIRP	LCP1	-0.129527	0.0941351	3936
KIRP	MMP1	-0.0397894	0.70422	4312
KIRP	MMP10	0.0593783	0.530187	4319
KIRP	MMP12	-0.0721922	0.42302	4321
KIRP	MMP13	0.0630662	0.500082	4322
KIRP	MMP14	0.177413	0.0136051	4323
KIRP	MMP2	-0.425865	6.72456e-12	4313
KIRP	MMP3	0.0604361	0.520334	4314
KIRP	MMP9	-0.121875	0.120542	4318
KIRP	SERPINE1	-0.118577	0.133321	5054
KIRP	SPP1	0.0428556	0.677714	6696
KIRP	TIMP2	0.257698	0.000125588	7077
KIRP	TNF	-0.00424735	0.975971	7124
KIRP	TNFRSF11B	-0.0783367	0.373353	4982
LAML	FGF2	-0.203734	0.999933	2247
LAML	ICAM1	-0.0212117	0.999933	3383
LAML	ICAM3	-0.219684	0.999933	3385
LAML	ITGA2	0.0103649	0.999933	3673
LAML	LCP1	-0.053297	0.999933	3936
LAML	MMP1	0.0336659	0.999933	4312
LAML	MMP10	-0.0726764	0.999933	4319
LAML	MMP12	0.110285	0.999933	4321
LAML	MMP13	-0.0174131	0.999933	4322
LAML	MMP14	0.0145398	0.999933	4323
LAML	MMP2	0.222163	0.999933	4313
LAML	MMP3	-0.188517	0.999933	4314
LAML	MMP9	-0.0172435	0.999933	4318
LAML	SERPINE1	0.040115	0.999933	5054
LAML	SPP1	0.112689	0.999933	6696
LAML	TIMP2	0.201205	0.999933	7077
LAML	TNF	0.0393974	0.999933	7124
LAML	TNFRSF11B	-0.0199047	0.999933	4982
LGG	FGF2	0.30479	7.48407e-11	2247
LGG	ICAM1	-0.109056	0.047063	3383
LGG	ICAM3	0.193398	9.7448e-05	3385
LGG	ITGA2	0.0679146	0.267066	3673
LGG	LCP1	-0.164548	0.00121276	3936
LGG	MMP1	0.111069	0.0423058	4312
LGG	MMP10	-0.0237137	0.766059	4319
LGG	MMP12	0.0539645	0.40628	4321
LGG	MMP13	-0.055445	0.389895	4322
LGG	MMP14	-0.151534	0.00326634	4323
LGG	MMP2	0.0473659	0.483321	4313
LGG	MMP3	0.0372858	0.605254	4314
LGG	MMP9	0.0841792	0.148279	4318
LGG	SERPINE1	0.17391	0.00055983	5054
LGG	SPP1	0.306835	5.37476e-11	6696
LGG	TIMP2	0.16514	0.00115667	7077
LGG	TNF	-0.0732364	0.223151	7124
LGG	TNFRSF11B	0.0360849	0.620794	4982
LIHC	FGF2	0.197922	0.00070373	2247
LIHC	ICAM1	0.0549976	0.476734	3383
LIHC	ICAM3	0.261276	3.27998e-06	3385
LIHC	ITGA2	-0.126219	0.0465293	3673
LIHC	LCP1	0.121523	0.0572516	3936
LIHC	MMP1	-0.0923795	0.174149	4312
LIHC	MMP10	0.0573524	0.453207	4319
LIHC	MMP12	-0.0646964	0.380675	4321
LIHC	MMP13	-0.0181861	0.848499	4322
LIHC	MMP14	-0.0194687	0.83539	4323
LIHC	MMP2	0.0986953	0.140871	4313
LIHC	MMP3	-0.0715843	0.321477	4314
LIHC	MMP9	0.149618	0.0146278	4318
LIHC	SERPINE1	0.0902803	0.185823	5054
LIHC	SPP1	0.0514452	0.512538	6696
LIHC	TIMP2	-0.147101	0.0167547	7077
LIHC	TNF	-0.0970448	0.149046	7124
LIHC	TNFRSF11B	0.142354	0.0214325	4982
LUAD	FGF2	0.0807302	0.118312	2247
LUAD	ICAM1	0.280331	6.10532e-10	3383
LUAD	ICAM3	0.310462	4.65309e-12	3385
LUAD	ITGA2	0.219815	2.01846e-06	3673
LUAD	LCP1	0.0919297	0.0703308	3936
LUAD	MMP1	0.0839817	0.1022	4312
LUAD	MMP10	-0.00783328	0.909889	4319
LUAD	MMP12	0.0289561	0.624094	4321
LUAD	MMP13	0.0967735	0.0550622	4322
LUAD	MMP14	0.0734111	0.160126	4323
LUAD	MMP2	0.0593475	0.269489	4313
LUAD	MMP3	0.058493	0.277294	4314
LUAD	MMP9	0.0975247	0.0529562	4318
LUAD	SERPINE1	0.0902296	0.0763886	5054
LUAD	SPP1	-0.0410313	0.466601	6696
LUAD	TIMP2	0.165708	0.00048702	7077
LUAD	TNF	-0.0699277	0.184107	7124
LUAD	TNFRSF11B	-0.0644075	0.225585	4982
LUSC	FGF2	0.16312	0.000637915	2247
LUSC	ICAM1	0.115495	0.0188821	3383
LUSC	ICAM3	0.212362	5.5584e-06	3385
LUSC	ITGA2	0.17007	0.000353882	3673
LUSC	LCP1	0.183361	0.000106059	3936
LUSC	MMP1	0.0631528	0.226364	4312
LUSC	MMP10	0.127835	0.00875019	4319
LUSC	MMP12	0.0426792	0.432249	4321
LUSC	MMP13	0.0974327	0.0511155	4322
LUSC	MMP14	0.293349	1.18881e-10	4323
LUSC	MMP2	0.146528	0.00235713	4313
LUSC	MMP3	-0.00588277	0.929347	4314
LUSC	MMP9	-8.9098e-05	0.999259	4318
LUSC	SERPINE1	0.0119418	0.84651	5054
LUSC	SPP1	-0.0759389	0.137921	6696
LUSC	TIMP2	-0.0888064	0.0782429	7077
LUSC	TNF	0.184869	9.1934e-05	7124
LUSC	TNFRSF11B	0.0540818	0.307838	4982
MESO	FGF2	0.107741	0.633892	2247
MESO	ICAM1	-0.00584182	0.989598	3383
MESO	ICAM3	0.175665	0.340126	3385
MESO	ITGA2	0.0938904	0.695117	3673
MESO	LCP1	-0.0331808	0.918902	3936
MESO	MMP1	0.0182403	0.964611	4312
MESO	MMP10	0.108416	0.63077	4319
MESO	MMP12	-0.212435	0.213212	4321
MESO	MMP13	-0.0884997	0.71795	4322
MESO	MMP14	0.327222	0.0253285	4323
MESO	MMP2	-0.00796511	0.987778	4313
MESO	MMP3	0.126682	0.547194	4314
MESO	MMP9	-0.0109381	0.980839	4318
MESO	SERPINE1	0.00433938	0.992432	5054
MESO	SPP1	-0.140713	0.487365	6696
MESO	TIMP2	0.140624	0.487832	7077
MESO	TNF	-0.17639	0.338262	7124
MESO	TNFRSF11B	0.0858762	0.725311	4982
OV	FGF2	0.129339	0.0422746	2247
OV	ICAM1	0.205328	0.000793144	3383
OV	ICAM3	0.505959	5.41936e-20	3385
OV	ITGA2	0.385829	1.93815e-11	3673
OV	LCP1	0.0890061	0.175828	3936
OV	MMP1	0.0649372	0.336536	4312
OV	MMP10	0.104458	0.10731	4319
OV	MMP12	0.0163545	0.827853	4321
OV	MMP13	0.0521344	0.449205	4322
OV	MMP14	0.140023	0.0267343	4323
OV	MMP2	0.13775	0.029543	4313
OV	MMP3	0.0763336	0.25146	4314
OV	MMP9	-0.0682506	0.310619	4318
OV	SERPINE1	-0.0483187	0.486514	5054
OV	SPP1	0.0844728	0.201048	6696
OV	TIMP2	0.244129	5.1055e-05	7077
OV	TNF	0.170832	0.00599315	7124
OV	TNFRSF11B	0.385393	2.05521e-11	4982
PAAD	FGF2	-0.0290287	0.848249	2247
PAAD	ICAM1	-0.134502	0.203302	3383
PAAD	ICAM3	0.123212	0.254356	3385
PAAD	ITGA2	0.014046	0.934838	3673
PAAD	LCP1	0.0145675	0.93339	3936
PAAD	MMP1	0.160633	0.111133	4312
PAAD	MMP10	0.0941743	0.421476	4319
PAAD	MMP12	0.0952202	0.414099	4321
PAAD	MMP13	0.272829	0.0023545	4322
PAAD	MMP14	-0.0214008	0.894987	4323
PAAD	MMP2	-0.00241878	0.989575	4313
PAAD	MMP3	0.0919893	0.435775	4314
PAAD	MMP9	0.00955903	0.959373	4318
PAAD	SERPINE1	-0.164527	0.101015	5054
PAAD	SPP1	0.0165944	0.923172	6696
PAAD	TIMP2	0.0627043	0.631077	7077
PAAD	TNF	0.0444126	0.752548	7124
PAAD	TNFRSF11B	0.196374	0.0410786	4982
PCPG	FGF2	0.189143	0.124821	2247
PCPG	ICAM1	-0.116222	0.456271	3383
PCPG	ICAM3	-0.118657	0.443533	3385
PCPG	ITGA2	-0.0560859	0.80857	3673
PCPG	LCP1	0.0574744	0.80118	3936
PCPG	MMP1	-0.0891187	0.618114	4312
PCPG	MMP10	-0.0851124	0.641649	4319
PCPG	MMP12	-0.0513058	0.831701	4321
PCPG	MMP13	-0.11189	0.482707	4322
PCPG	MMP14	-0.0942969	0.587753	4323
PCPG	MMP2	0.00393128	0.993262	4313
PCPG	MMP3	-0.0604308	0.787051	4314
PCPG	MMP9	-0.076846	0.693096	4318
PCPG	SERPINE1	0.180975	0.150516	5054
PCPG	SPP1	-0.0178516	0.965479	6696
PCPG	TIMP2	0.177418	0.162058	7077
PCPG	TNF	0.0131611	0.97519	7124
PCPG	TNFRSF11B	0.0170566	0.966032	4982
PRAD	FGF2	-0.0707009	0.348063	2247
PRAD	ICAM1	0.0911391	0.177684	3383
PRAD	ICAM3	-0.0363595	0.713039	3385
PRAD	ITGA2	0.1425	0.0152487	3673
PRAD	LCP1	0.357111	1.59936e-13	3936
PRAD	MMP1	0.00605512	0.968206	4312
PRAD	MMP10	0.0875373	0.201986	4319
PRAD	MMP12	0.0548696	0.51307	4321
PRAD	MMP13	0.000582143	0.997706	4322
PRAD	MMP14	-0.10147	0.119004	4323
PRAD	MMP2	-0.00379308	0.980107	4313
PRAD	MMP3	0.0336682	0.742387	4314
PRAD	MMP9	0.0620502	0.434145	4318
PRAD	SERPINE1	0.0584288	0.473135	5054
PRAD	SPP1	-0.00921452	0.95158	6696
PRAD	TIMP2	0.0523431	0.54068	7077
PRAD	TNF	0.0316318	0.761925	7124
PRAD	TNFRSF11B	-0.146657	0.0119594	4982
READ	FGF2	0.0292001	0.92229	2247
READ	ICAM1	-0.0122205	0.974329	3383
READ	ICAM3	0.275648	0.036788	3385
READ	ITGA2	0.484272	2.5794e-05	3673
READ	LCP1	-0.218125	0.127787	3936
READ	MMP1	0.0370363	0.892938	4312
READ	MMP10	-0.114325	0.536707	4319
READ	MMP12	0.133238	0.445825	4321
READ	MMP13	0.161814	0.316903	4322
READ	MMP14	0.194061	0.194956	4323
READ	MMP2	0.121786	0.501264	4313
READ	MMP3	-0.000328283	0.999269	4314
READ	MMP9	-0.0111756	0.977044	4318
READ	SERPINE1	0.0365287	0.89525	5054
READ	SPP1	-0.217047	0.130211	6696
READ	TIMP2	0.0898568	0.661812	7077
READ	TNF	0.102912	0.594851	7124
READ	TNFRSF11B	-0.00810206	0.984886	4982
SARC	FGF2	0.0516116	0.563278	2247
SARC	ICAM1	0.0489943	0.585864	3383
SARC	ICAM3	0.160803	0.0279509	3385
SARC	ITGA2	0.0384623	0.681046	3673
SARC	LCP1	0.118686	0.123045	3936
SARC	MMP1	0.0824434	0.317737	4312
SARC	MMP10	0.158621	0.0305252	4319
SARC	MMP12	0.134067	0.0748024	4321
SARC	MMP13	0.0793673	0.339038	4322
SARC	MMP14	0.22212	0.00142474	4323
SARC	MMP2	0.289183	1.6503e-05	4313
SARC	MMP3	0.247132	0.000316091	4314
SARC	MMP9	0.0296719	0.759768	4318
SARC	SERPINE1	0.159228	0.0297982	5054
SARC	SPP1	0.00860655	0.936526	6696
SARC	TIMP2	0.422115	4.01325e-11	7077
SARC	TNF	-0.0580688	0.507532	7124
SARC	TNFRSF11B	0.115535	0.135305	4982
SKCM	FGF2	0.00864706	0.924932	2247
SKCM	ICAM1	0.0254731	0.756796	3383
SKCM	ICAM3	0.129695	0.0329835	3385
SKCM	ITGA2	0.18519	0.00130759	3673
SKCM	LCP1	-0.0801065	0.227521	3936
SKCM	MMP1	0.195221	0.000644769	4312
SKCM	MMP10	0.189861	0.000946783	4319
SKCM	MMP12	0.131708	0.0299729	4321
SKCM	MMP13	0.00652096	0.944552	4322
SKCM	MMP14	0.301469	2.95572e-08	4323
SKCM	MMP2	-0.00557903	0.954399	4313
SKCM	MMP3	0.117901	0.0564342	4314
SKCM	MMP9	-0.0459254	0.535611	4318
SKCM	SERPINE1	0.143877	0.0161448	5054
SKCM	SPP1	-0.112106	0.0722441	6696
SKCM	TIMP2	0.44053	2.37964e-17	7077
SKCM	TNF	-0.0616028	0.379686	7124
SKCM	TNFRSF11B	-0.0906973	0.162448	4982
STAD	FGF2	-0.0459442	0.497827	2247
STAD	ICAM1	0.129105	0.0233032	3383
STAD	ICAM3	0.285262	3.11501e-08	3385
STAD	ITGA2	0.207	0.000104286	3673
STAD	LCP1	-0.067499	0.286247	3936
STAD	MMP1	0.000351981	0.996089	4312
STAD	MMP10	-0.0811337	0.185801	4319
STAD	MMP12	-0.0320255	0.658699	4321
STAD	MMP13	0.0284285	0.699403	4322
STAD	MMP14	0.104895	0.0749194	4323
STAD	MMP2	0.099641	0.0932636	4313
STAD	MMP3	-0.0994643	0.0939356	4314
STAD	MMP9	0.01352	0.866963	4318
STAD	SERPINE1	0.00247355	0.977724	5054
STAD	SPP1	0.0437223	0.522534	6696
STAD	TIMP2	0.0803397	0.191151	7077
STAD	TNF	0.00672155	0.939729	7124
STAD	TNFRSF11B	0.26399	3.73806e-07	4982
TGCT	FGF2	-0.0704655	0.613381	2247
TGCT	ICAM1	0.120053	0.318759	3383
TGCT	ICAM3	0.275948	0.00501155	3385
TGCT	ITGA2	0.0498115	0.743014	3673
TGCT	LCP1	0.212463	0.0410207	3936
TGCT	MMP1	0.301996	0.00176761	4312
TGCT	MMP10	0.254514	0.0107919	4319
TGCT	MMP12	0.152035	0.176984	4321
TGCT	MMP13	0.0912011	0.481239	4322
TGCT	MMP14	-0.0878638	0.501885	4323
TGCT	MMP2	0.33958	0.000327759	4313
TGCT	MMP3	0.0644859	0.651033	4314
TGCT	MMP9	-0.0581248	0.691456	4318
TGCT	SERPINE1	0.0778989	0.566043	5054
TGCT	SPP1	0.0746327	0.586476	6696
TGCT	TIMP2	0.311299	0.00118968	7077
TGCT	TNF	-0.0180935	0.924787	7124
TGCT	TNFRSF11B	-0.181627	0.0912906	4982
THCA	FGF2	-0.0328143	0.972101	2247
THCA	ICAM1	0.0115543	0.998538	3383
THCA	ICAM3	-0.0307309	0.979727	3385
THCA	ITGA2	-0.0109651	0.998538	3673
THCA	LCP1	0.0279986	0.98561	3936
THCA	MMP1	-0.0715135	0.711703	4312
THCA	MMP10	-0.0157482	0.998538	4319
THCA	MMP12	-0.0386666	0.948438	4321
THCA	MMP13	-0.0752964	0.682505	4322
THCA	MMP14	-0.123784	0.210844	4323
THCA	MMP2	-0.0289928	0.983182	4313
THCA	MMP3	-0.01692	0.998538	4314
THCA	MMP9	0.043458	0.921775	4318
THCA	SERPINE1	-0.000502829	0.999853	5054
THCA	SPP1	0.00567934	0.998538	6696
THCA	TIMP2	-0.0660179	0.752279	7077
THCA	TNF	-0.0486024	0.890273	7124
THCA	TNFRSF11B	-0.0785776	0.650721	4982
THYM	FGF2	0.240411	0.201774	2247
THYM	ICAM1	0.0362757	0.964102	3383
THYM	ICAM3	-0.188516	0.395745	3385
THYM	ITGA2	0.16617	0.49375	3673
THYM	LCP1	0.0593562	0.904869	3936
THYM	MMP1	0.14458	0.589387	4312
THYM	MMP10	-0.0822068	0.838658	4319
THYM	MMP12	0.0868665	0.816553	4321
THYM	MMP13	0.357337	0.0149557	4322
THYM	MMP14	-0.232647	0.226421	4323
THYM	MMP2	-0.163697	0.505923	4313
THYM	MMP3	0.351531	0.0173452	4314
THYM	MMP9	0.0534217	0.922677	4318
THYM	SERPINE1	-0.0754354	0.855964	5054
THYM	SPP1	0.025362	0.981552	6696
THYM	TIMP2	-0.152375	0.555971	7077
THYM	TNF	-0.132771	0.640059	7124
THYM	TNFRSF11B	0.252663	0.164251	4982
UCEC	FGF2	0.0170593	0.913374	2247
UCEC	ICAM1	0.132502	0.19448	3383
UCEC	ICAM3	0.342077	4.6119e-05	3385
UCEC	ITGA2	0.208238	0.0228474	3673
UCEC	LCP1	0.0458045	0.729822	3936
UCEC	MMP1	0.103534	0.341026	4312
UCEC	MMP10	0.0352262	0.802305	4319
UCEC	MMP12	-0.0743764	0.530378	4321
UCEC	MMP13	0.0331654	0.814477	4322
UCEC	MMP14	0.0415469	0.760109	4323
UCEC	MMP2	0.222544	0.0135973	4313
UCEC	MMP3	-0.00212019	0.990733	4314
UCEC	MMP9	-0.0241882	0.872519	4318
UCEC	SERPINE1	0.192113	0.039194	5054
UCEC	SPP1	0.12013	0.251258	6696
UCEC	TIMP2	0.166958	0.0825015	7077
UCEC	TNF	0.104798	0.333726	7124
UCEC	TNFRSF11B	-0.0153537	0.923691	4982
UCS	FGF2	-0.194053	0.360848	2247
UCS	ICAM1	0.265072	0.165942	3383
UCS	ICAM3	0.411483	0.0136108	3385
UCS	ITGA2	0.0859623	0.759629	3673
UCS	LCP1	-0.0614491	0.834351	3936
UCS	MMP1	0.103043	0.697645	4312
UCS	MMP10	0.065859	0.821013	4319
UCS	MMP12	-0.0461412	0.880608	4321
UCS	MMP13	-0.076902	0.787578	4322
UCS	MMP14	0.449229	0.00536138	4323
UCS	MMP2	0.153286	0.503723	4313
UCS	MMP3	-0.0620222	0.833676	4314
UCS	MMP9	-0.114833	0.652021	4318
UCS	SERPINE1	0.0365035	0.909238	5054
UCS	SPP1	0.185205	0.391806	6696
UCS	TIMP2	0.389474	0.0212801	7077
UCS	TNF	0.0209515	0.948025	7124
UCS	TNFRSF11B	0.0645933	0.824879	4982
UVM	FGF2	-0.03882	0.991537	2247
UVM	ICAM1	0.0855217	0.933494	3383
UVM	ICAM3	-0.0214185	0.999089	3385
UVM	ITGA2	0.0972801	0.905299	3673
UVM	LCP1	0.108711	0.883152	3936
UVM	MMP1	-0.117864	0.859402	4312
UVM	MMP10	-0.00325527	0.999145	4319
UVM	MMP12	-0.178995	0.655412	4321
UVM	MMP13	-0.214906	0.49814	4322
UVM	MMP14	-0.243303	0.38103	4323
UVM	MMP2	-0.027938	0.997948	4313
UVM	MMP3	-0.154023	0.750706	4314
UVM	MMP9	0.0614192	0.968642	4318
UVM	SERPINE1	0.182558	0.640321	5054
UVM	SPP1	-0.2525	0.344478	6696
UVM	TIMP2	0.383649	0.0315902	7077
UVM	TNF	-0.264765	0.296229	7124
UVM	TNFRSF11B	0.304054	0.164299	4982
