# Supplementary material for: Pan-cancer analyses of senescence-related genes in extracellular matrix characterization in cancer
Source: Discov Oncol. 2023 Nov 20;14:208. doi: 10.1007/s12672-023-00828-7 (PMC10660488; doi:10.1007/s12672-023-00828-7)
Supplement: Supplementary file 20 — Supplementary file20 (XLSX 82 KB) [file 12672_2023_828_MOESM20_ESM.xlsx]

## Sheet: SheetName
Table S15 The detailed information of survival difference between CNV and wide type in pan-cancer
cancertype	symbol	sur_type	log_rank_p	entrez
ACC	FGF2	OS	0.000182643	2247
ACC	FGF2	PFS	1.9026e-05	2247
ACC	FGF2	DSS	0.000394564	2247
ACC	FGF2	DFI	0.306882	2247
ACC	ICAM1	OS	0.00324825	3383
ACC	ICAM1	PFS	0.00315768	3383
ACC	ICAM1	DSS	0.0208759	3383
ACC	ICAM1	DFI	0.56016	3383
ACC	ICAM3	OS	0.00324825	3385
ACC	ICAM3	PFS	0.00315768	3385
ACC	ICAM3	DSS	0.0208759	3385
ACC	ICAM3	DFI	0.56016	3385
ACC	ITGA2	OS	0.0975225	3673
ACC	ITGA2	PFS	0.0877517	3673
ACC	ITGA2	DSS	0.095084	3673
ACC	ITGA2	DFI	0.0190845	3673
ACC	LCP1	OS	0.1749	3936
ACC	LCP1	PFS	0.449249	3936
ACC	LCP1	DSS	0.34434	3936
ACC	LCP1	DFI	0.288619	3936
ACC	MMP1	OS	2.8998e-05	4312
ACC	MMP1	PFS	4.7457e-05	4312
ACC	MMP1	DSS	1.8358e-05	4312
ACC	MMP1	DFI	0.437315	4312
ACC	MMP10	OS	0.00894116	4319
ACC	MMP10	PFS	0.064802	4319
ACC	MMP10	DSS	0.00443814	4319
ACC	MMP10	DFI	0.360942	4319
ACC	MMP12	OS	2.8998e-05	4321
ACC	MMP12	PFS	4.7457e-05	4321
ACC	MMP12	DSS	1.8358e-05	4321
ACC	MMP12	DFI	0.437315	4321
ACC	MMP13	OS	2.8998e-05	4322
ACC	MMP13	PFS	4.7457e-05	4322
ACC	MMP13	DSS	1.8358e-05	4322
ACC	MMP13	DFI	0.437315	4322
ACC	MMP14	OS	0.404013	4323
ACC	MMP14	PFS	0.194308	4323
ACC	MMP14	DSS	0.364242	4323
ACC	MMP14	DFI	0.139247	4323
ACC	MMP2	OS	0.172571	4313
ACC	MMP2	PFS	0.016271	4313
ACC	MMP2	DSS	0.143195	4313
ACC	MMP2	DFI	0.47688	4313
ACC	MMP3	OS	2.8998e-05	4314
ACC	MMP3	PFS	4.7457e-05	4314
ACC	MMP3	DSS	1.8358e-05	4314
ACC	MMP3	DFI	0.437315	4314
ACC	MMP9	OS	0.519309	4318
ACC	MMP9	PFS	0.0811571	4318
ACC	MMP9	DSS	0.396029	4318
ACC	MMP9	DFI	0.00771649	4318
ACC	SERPINE1	OS	0.00687888	5054
ACC	SERPINE1	PFS	0.0409831	5054
ACC	SERPINE1	DSS	0.00309757	5054
ACC	SERPINE1	DFI	0.492826	5054
ACC	SPP1	OS	0.00118219	6696
ACC	SPP1	PFS	0.00089206	6696
ACC	SPP1	DSS	0.00327332	6696
ACC	SPP1	DFI	0.68675	6696
ACC	TIMP2	OS	0.0353695	7077
ACC	TIMP2	PFS	0.132659	7077
ACC	TIMP2	DSS	0.0752829	7077
ACC	TIMP2	DFI	0.931894	7077
ACC	TNF	OS	0.510625	7124
ACC	TNF	PFS	0.823414	7124
ACC	TNF	DSS	0.47271	7124
ACC	TNF	DFI	0.560133	7124
ACC	TNFRSF11B	OS	0.630129	4982
ACC	TNFRSF11B	PFS	0.286093	4982
ACC	TNFRSF11B	DSS	0.450694	4982
ACC	TNFRSF11B	DFI	0.211427	4982
BLCA	FGF2	OS	0.635893	2247
BLCA	FGF2	PFS	0.530261	2247
BLCA	FGF2	DSS	0.773495	2247
BLCA	FGF2	DFI	0.45399	2247
BLCA	ICAM1	OS	0.516852	3383
BLCA	ICAM1	PFS	0.624959	3383
BLCA	ICAM1	DSS	0.534854	3383
BLCA	ICAM1	DFI	0.749768	3383
BLCA	ICAM3	OS	0.519941	3385
BLCA	ICAM3	PFS	0.596416	3385
BLCA	ICAM3	DSS	0.527819	3385
BLCA	ICAM3	DFI	0.749768	3385
BLCA	ITGA2	OS	0.166156	3673
BLCA	ITGA2	PFS	0.0812036	3673
BLCA	ITGA2	DSS	0.181624	3673
BLCA	ITGA2	DFI	0.05424	3673
BLCA	LCP1	OS	0.585013	3936
BLCA	LCP1	PFS	0.275843	3936
BLCA	LCP1	DSS	0.774365	3936
BLCA	LCP1	DFI	0.650646	3936
BLCA	MMP1	OS	0.927894	4312
BLCA	MMP1	PFS	0.917151	4312
BLCA	MMP1	DSS	0.56372	4312
BLCA	MMP1	DFI	0.506679	4312
BLCA	MMP10	OS	0.927894	4319
BLCA	MMP10	PFS	0.917151	4319
BLCA	MMP10	DSS	0.56372	4319
BLCA	MMP10	DFI	0.506679	4319
BLCA	MMP12	OS	0.938819	4321
BLCA	MMP12	PFS	0.953844	4321
BLCA	MMP12	DSS	0.581788	4321
BLCA	MMP12	DFI	0.631768	4321
BLCA	MMP13	OS	0.928759	4322
BLCA	MMP13	PFS	0.93814	4322
BLCA	MMP13	DSS	0.556716	4322
BLCA	MMP13	DFI	0.58739	4322
BLCA	MMP14	OS	0.0108955	4323
BLCA	MMP14	PFS	0.0151441	4323
BLCA	MMP14	DSS	0.0181398	4323
BLCA	MMP14	DFI	0.293796	4323
BLCA	MMP2	OS	0.868264	4313
BLCA	MMP2	PFS	0.47521	4313
BLCA	MMP2	DSS	0.415178	4313
BLCA	MMP2	DFI	0.703124	4313
BLCA	MMP3	OS	0.938819	4314
BLCA	MMP3	PFS	0.953844	4314
BLCA	MMP3	DSS	0.581788	4314
BLCA	MMP3	DFI	0.631768	4314
BLCA	MMP9	OS	0.867226	4318
BLCA	MMP9	PFS	0.260024	4318
BLCA	MMP9	DSS	0.838154	4318
BLCA	MMP9	DFI	0.00195584	4318
BLCA	SERPINE1	OS	0.511327	5054
BLCA	SERPINE1	PFS	0.558968	5054
BLCA	SERPINE1	DSS	0.809675	5054
BLCA	SERPINE1	DFI	0.111687	5054
BLCA	SPP1	OS	0.151751	6696
BLCA	SPP1	PFS	0.858342	6696
BLCA	SPP1	DSS	0.150632	6696
BLCA	SPP1	DFI	0.683391	6696
BLCA	TIMP2	OS	0.150659	7077
BLCA	TIMP2	PFS	0.070184	7077
BLCA	TIMP2	DSS	0.130345	7077
BLCA	TIMP2	DFI	0.0362979	7077
BLCA	TNF	OS	0.377686	7124
BLCA	TNF	PFS	0.54992	7124
BLCA	TNF	DSS	0.19107	7124
BLCA	TNF	DFI	0.895677	7124
BLCA	TNFRSF11B	OS	0.941759	4982
BLCA	TNFRSF11B	PFS	0.619877	4982
BLCA	TNFRSF11B	DSS	0.742993	4982
BLCA	TNFRSF11B	DFI	0.383554	4982
BRCA	FGF2	OS	0.311108	2247
BRCA	FGF2	PFS	0.197846	2247
BRCA	FGF2	DSS	0.683104	2247
BRCA	FGF2	DFI	0.872851	2247
BRCA	ICAM1	OS	0.544779	3383
BRCA	ICAM1	PFS	0.757578	3383
BRCA	ICAM1	DSS	0.36559	3383
BRCA	ICAM1	DFI	0.492876	3383
BRCA	ICAM3	OS	0.532748	3385
BRCA	ICAM3	PFS	0.840405	3385
BRCA	ICAM3	DSS	0.363239	3385
BRCA	ICAM3	DFI	0.492632	3385
BRCA	ITGA2	OS	0.624714	3673
BRCA	ITGA2	PFS	0.443285	3673
BRCA	ITGA2	DSS	0.248487	3673
BRCA	ITGA2	DFI	0.13676	3673
BRCA	LCP1	OS	0.469379	3936
BRCA	LCP1	PFS	0.920947	3936
BRCA	LCP1	DSS	0.811273	3936
BRCA	LCP1	DFI	0.776215	3936
BRCA	MMP1	OS	0.0524281	4312
BRCA	MMP1	PFS	0.558121	4312
BRCA	MMP1	DSS	0.311897	4312
BRCA	MMP1	DFI	0.595385	4312
BRCA	MMP10	OS	0.0524281	4319
BRCA	MMP10	PFS	0.558121	4319
BRCA	MMP10	DSS	0.311897	4319
BRCA	MMP10	DFI	0.595385	4319
BRCA	MMP12	OS	0.090794	4321
BRCA	MMP12	PFS	0.606406	4321
BRCA	MMP12	DSS	0.502925	4321
BRCA	MMP12	DFI	0.610513	4321
BRCA	MMP13	OS	0.090794	4322
BRCA	MMP13	PFS	0.606406	4322
BRCA	MMP13	DSS	0.502925	4322
BRCA	MMP13	DFI	0.610513	4322
BRCA	MMP14	OS	0.104532	4323
BRCA	MMP14	PFS	0.317056	4323
BRCA	MMP14	DSS	0.599922	4323
BRCA	MMP14	DFI	0.45603	4323
BRCA	MMP2	OS	0.540069	4313
BRCA	MMP2	PFS	0.175894	4313
BRCA	MMP2	DSS	0.341299	4313
BRCA	MMP2	DFI	0.0836431	4313
BRCA	MMP3	OS	0.090794	4314
BRCA	MMP3	PFS	0.606406	4314
BRCA	MMP3	DSS	0.502925	4314
BRCA	MMP3	DFI	0.610513	4314
BRCA	MMP9	OS	0.67659	4318
BRCA	MMP9	PFS	0.80782	4318
BRCA	MMP9	DSS	0.358734	4318
BRCA	MMP9	DFI	0.485032	4318
BRCA	SERPINE1	OS	0.10883	5054
BRCA	SERPINE1	PFS	0.289425	5054
BRCA	SERPINE1	DSS	0.432922	5054
BRCA	SERPINE1	DFI	0.533969	5054
BRCA	SPP1	OS	0.0769794	6696
BRCA	SPP1	PFS	0.0352174	6696
BRCA	SPP1	DSS	0.851372	6696
BRCA	SPP1	DFI	0.6681	6696
BRCA	TIMP2	OS	0.0850033	7077
BRCA	TIMP2	PFS	0.123719	7077
BRCA	TIMP2	DSS	0.00265851	7077
BRCA	TIMP2	DFI	0.00718028	7077
BRCA	TNF	OS	0.264404	7124
BRCA	TNF	PFS	0.514116	7124
BRCA	TNF	DSS	0.384873	7124
BRCA	TNF	DFI	0.849666	7124
BRCA	TNFRSF11B	OS	0.114561	4982
BRCA	TNFRSF11B	PFS	0.811433	4982
BRCA	TNFRSF11B	DSS	0.0506917	4982
BRCA	TNFRSF11B	DFI	0.318671	4982
CESC	FGF2	OS	0.651319	2247
CESC	FGF2	PFS	0.486032	2247
CESC	FGF2	DSS	0.786303	2247
CESC	FGF2	DFI	0.944205	2247
CESC	ICAM1	OS	0.00997317	3383
CESC	ICAM1	PFS	0.000750152	3383
CESC	ICAM1	DSS	0.0492565	3383
CESC	ICAM1	DFI	0.0239578	3383
CESC	ICAM3	OS	0.0172239	3385
CESC	ICAM3	PFS	0.00136577	3385
CESC	ICAM3	DSS	0.0861172	3385
CESC	ICAM3	DFI	0.0676863	3385
CESC	ITGA2	OS	0.176031	3673
CESC	ITGA2	PFS	0.0477084	3673
CESC	ITGA2	DSS	0.308507	3673
CESC	ITGA2	DFI	0.0194554	3673
CESC	LCP1	OS	0.121952	3936
CESC	LCP1	PFS	0.0456085	3936
CESC	LCP1	DSS	0.250664	3936
CESC	LCP1	DFI	0.120211	3936
CESC	MMP1	OS	0.765169	4312
CESC	MMP1	PFS	0.865713	4312
CESC	MMP1	DSS	0.587428	4312
CESC	MMP1	DFI	0.243549	4312
CESC	MMP10	OS	0.918824	4319
CESC	MMP10	PFS	0.965481	4319
CESC	MMP10	DSS	0.769602	4319
CESC	MMP10	DFI	0.243549	4319
CESC	MMP12	OS	0.717302	4321
CESC	MMP12	PFS	0.834499	4321
CESC	MMP12	DSS	0.587508	4321
CESC	MMP12	DFI	0.273571	4321
CESC	MMP13	OS	0.715687	4322
CESC	MMP13	PFS	0.811291	4322
CESC	MMP13	DSS	0.688991	4322
CESC	MMP13	DFI	0.233079	4322
CESC	MMP14	OS	0.786222	4323
CESC	MMP14	PFS	0.583661	4323
CESC	MMP14	DSS	0.989034	4323
CESC	MMP14	DFI	0.0904149	4323
CESC	MMP2	OS	0.537815	4313
CESC	MMP2	PFS	0.15057	4313
CESC	MMP2	DSS	0.730561	4313
CESC	MMP2	DFI	0.000750226	4313
CESC	MMP3	OS	0.760024	4314
CESC	MMP3	PFS	0.864055	4314
CESC	MMP3	DSS	0.667057	4314
CESC	MMP3	DFI	0.277985	4314
CESC	MMP9	OS	0.79643	4318
CESC	MMP9	PFS	0.694888	4318
CESC	MMP9	DSS	0.669343	4318
CESC	MMP9	DFI	0.799727	4318
CESC	SERPINE1	OS	0.41365	5054
CESC	SERPINE1	PFS	0.441321	5054
CESC	SERPINE1	DSS	0.241881	5054
CESC	SERPINE1	DFI	0.0339005	5054
CESC	SPP1	OS	0.560907	6696
CESC	SPP1	PFS	0.565036	6696
CESC	SPP1	DSS	0.710023	6696
CESC	SPP1	DFI	0.931905	6696
CESC	TIMP2	OS	0.656659	7077
CESC	TIMP2	PFS	0.360446	7077
CESC	TIMP2	DSS	0.707295	7077
CESC	TIMP2	DFI	0.132353	7077
CESC	TNF	OS	0.775699	7124
CESC	TNF	PFS	0.435257	7124
CESC	TNF	DSS	0.617666	7124
CESC	TNF	DFI	0.0296977	7124
CESC	TNFRSF11B	OS	0.59346	4982
CESC	TNFRSF11B	PFS	0.240425	4982
CESC	TNFRSF11B	DSS	0.560073	4982
CESC	TNFRSF11B	DFI	0.229394	4982
CHOL	FGF2	OS	0.531946	2247
CHOL	FGF2	PFS	0.939185	2247
CHOL	FGF2	DSS	0.246438	2247
CHOL	FGF2	DFI	0.00353519	2247
CHOL	ICAM1	OS	0.748443	3383
CHOL	ICAM1	PFS	0.383433	3383
CHOL	ICAM1	DSS	0.697376	3383
CHOL	ICAM1	DFI	0.741991	3383
CHOL	ICAM3	OS	0.748443	3385
CHOL	ICAM3	PFS	0.383433	3385
CHOL	ICAM3	DSS	0.697376	3385
CHOL	ICAM3	DFI	0.741991	3385
CHOL	ITGA2	OS	0.839346	3673
CHOL	ITGA2	PFS	0.576428	3673
CHOL	ITGA2	DSS	0.937467	3673
CHOL	ITGA2	DFI	0.640414	3673
CHOL	LCP1	OS	0.642109	3936
CHOL	LCP1	PFS	0.403478	3936
CHOL	LCP1	DSS	0.321379	3936
CHOL	LCP1	DFI	0.256317	3936
CHOL	MMP1	OS	0.171538	4312
CHOL	MMP1	PFS	0.896358	4312
CHOL	MMP1	DSS	0.290655	4312
CHOL	MMP1	DFI	0.122287	4312
CHOL	MMP10	OS	0.171538	4319
CHOL	MMP10	PFS	0.896358	4319
CHOL	MMP10	DSS	0.290655	4319
CHOL	MMP10	DFI	0.122287	4319
CHOL	MMP12	OS	0.171538	4321
CHOL	MMP12	PFS	0.896358	4321
CHOL	MMP12	DSS	0.290655	4321
CHOL	MMP12	DFI	0.122287	4321
CHOL	MMP13	OS	0.171538	4322
CHOL	MMP13	PFS	0.896358	4322
CHOL	MMP13	DSS	0.290655	4322
CHOL	MMP13	DFI	0.122287	4322
CHOL	MMP14	OS	0.465039	4323
CHOL	MMP14	PFS	0.338281	4323
CHOL	MMP14	DSS	0.529058	4323
CHOL	MMP14	DFI	0.743961	4323
CHOL	MMP2	OS	0.52376	4313
CHOL	MMP2	PFS	0.244561	4313
CHOL	MMP2	DSS	0.626206	4313
CHOL	MMP2	DFI	0.69598	4313
CHOL	MMP3	OS	0.171538	4314
CHOL	MMP3	PFS	0.896358	4314
CHOL	MMP3	DSS	0.290655	4314
CHOL	MMP3	DFI	0.122287	4314
CHOL	MMP9	OS	0.49111	4318
CHOL	MMP9	PFS	0.515022	4318
CHOL	MMP9	DSS	0.457608	4318
CHOL	MMP9	DFI	0.961024	4318
CHOL	SERPINE1	OS	0.249756	5054
CHOL	SERPINE1	PFS	0.323636	5054
CHOL	SERPINE1	DSS	0.25569	5054
CHOL	SERPINE1	DFI	0.0116466	5054
CHOL	SPP1	OS	0.563781	6696
CHOL	SPP1	PFS	0.988656	6696
CHOL	SPP1	DSS	0.382816	6696
CHOL	SPP1	DFI	0.00332827	6696
CHOL	TIMP2	OS	0.440335	7077
CHOL	TIMP2	PFS	0.507671	7077
CHOL	TIMP2	DSS	0.545695	7077
CHOL	TIMP2	DFI	0.19989	7077
CHOL	TNF	OS	0.150539	7124
CHOL	TNF	PFS	0.341148	7124
CHOL	TNF	DSS	0.203942	7124
CHOL	TNF	DFI	0.452942	7124
CHOL	TNFRSF11B	OS	0.207302	4982
CHOL	TNFRSF11B	PFS	0.191944	4982
CHOL	TNFRSF11B	DSS	0.20184	4982
CHOL	TNFRSF11B	DFI	0.183151	4982
COAD	FGF2	OS	0.0390396	2247
COAD	FGF2	PFS	0.0128666	2247
COAD	FGF2	DSS	0.195823	2247
COAD	FGF2	DFI	0.0281712	2247
COAD	ICAM1	OS	0.454616	3383
COAD	ICAM1	PFS	0.0031974	3383
COAD	ICAM1	DSS	0.279847	3383
COAD	ICAM1	DFI	0.00181326	3383
COAD	ICAM3	OS	0.479484	3385
COAD	ICAM3	PFS	0.00340338	3385
COAD	ICAM3	DSS	0.29607	3385
COAD	ICAM3	DFI	0.00181326	3385
COAD	ITGA2	OS	0.179933	3673
COAD	ITGA2	PFS	0.0048794	3673
COAD	ITGA2	DSS	0.800537	3673
COAD	ITGA2	DFI	0.22359	3673
COAD	LCP1	OS	0.951721	3936
COAD	LCP1	PFS	0.766273	3936
COAD	LCP1	DSS	0.843266	3936
COAD	LCP1	DFI	0.160571	3936
COAD	MMP1	OS	0.513661	4312
COAD	MMP1	PFS	0.306961	4312
COAD	MMP1	DSS	0.417407	4312
COAD	MMP1	DFI	0.465328	4312
COAD	MMP10	OS	0.513661	4319
COAD	MMP10	PFS	0.306961	4319
COAD	MMP10	DSS	0.417407	4319
COAD	MMP10	DFI	0.465328	4319
COAD	MMP12	OS	0.464152	4321
COAD	MMP12	PFS	0.251091	4321
COAD	MMP12	DSS	0.377323	4321
COAD	MMP12	DFI	0.465328	4321
COAD	MMP13	OS	0.464152	4322
COAD	MMP13	PFS	0.251091	4322
COAD	MMP13	DSS	0.377323	4322
COAD	MMP13	DFI	0.465328	4322
COAD	MMP14	OS	0.719047	4323
COAD	MMP14	PFS	0.490553	4323
COAD	MMP14	DSS	0.876026	4323
COAD	MMP14	DFI	0.0354983	4323
COAD	MMP2	OS	0.0054367	4313
COAD	MMP2	PFS	0.00283366	4313
COAD	MMP2	DSS	0.00106122	4313
COAD	MMP2	DFI	0.15512	4313
COAD	MMP3	OS	0.464152	4314
COAD	MMP3	PFS	0.251091	4314
COAD	MMP3	DSS	0.377323	4314
COAD	MMP3	DFI	0.465328	4314
COAD	MMP9	OS	0.0079684	4318
COAD	MMP9	PFS	0.0416653	4318
COAD	MMP9	DSS	0.451858	4318
COAD	MMP9	DFI	0.107167	4318
COAD	SERPINE1	OS	0.382936	5054
COAD	SERPINE1	PFS	0.260649	5054
COAD	SERPINE1	DSS	0.516455	5054
COAD	SERPINE1	DFI	0.627742	5054
COAD	SPP1	OS	0.110324	6696
COAD	SPP1	PFS	0.0181517	6696
COAD	SPP1	DSS	0.161738	6696
COAD	SPP1	DFI	0.0571803	6696
COAD	TIMP2	OS	0.0257801	7077
COAD	TIMP2	PFS	0.322394	7077
COAD	TIMP2	DSS	0.0183371	7077
COAD	TIMP2	DFI	0.221756	7077
COAD	TNF	OS	0.242092	7124
COAD	TNF	PFS	0.177471	7124
COAD	TNF	DSS	0.407061	7124
COAD	TNF	DFI	0.15908	7124
COAD	TNFRSF11B	OS	0.722666	4982
COAD	TNFRSF11B	PFS	0.564216	4982
COAD	TNFRSF11B	DSS	0.76296	4982
COAD	TNFRSF11B	DFI	0.530001	4982
DLBC	FGF2	OS	0.315981	2247
DLBC	FGF2	PFS	0.608717	2247
DLBC	FGF2	DSS	0.425287	2247
DLBC	FGF2	DFI	0.605577	2247
DLBC	ICAM1	OS	0.653591	3383
DLBC	ICAM1	PFS	0.283147	3383
DLBC	ICAM1	DSS	0.755681	3383
DLBC	ICAM1	DFI	0.000344315	3383
DLBC	ICAM3	OS	0.653591	3385
DLBC	ICAM3	PFS	0.283147	3385
DLBC	ICAM3	DSS	0.755681	3385
DLBC	ICAM3	DFI	0.000344315	3385
DLBC	ITGA2	OS	0.606671	3673
DLBC	ITGA2	PFS	0.801277	3673
DLBC	ITGA2	DSS	0.378573	3673
DLBC	ITGA2	DFI	0.259509	3673
DLBC	LCP1	OS	0.772463	3936
DLBC	LCP1	PFS	0.97735	3936
DLBC	LCP1	DSS	0.32701	3936
DLBC	LCP1	DFI	0.595296	3936
DLBC	MMP1	OS	0.663842	4312
DLBC	MMP1	PFS	0.836843	4312
DLBC	MMP1	DSS	0.432497	4312
DLBC	MMP1	DFI	0.796126	4312
DLBC	MMP10	OS	0.663842	4319
DLBC	MMP10	PFS	0.836843	4319
DLBC	MMP10	DSS	0.432497	4319
DLBC	MMP10	DFI	0.796126	4319
DLBC	MMP12	OS	0.663842	4321
DLBC	MMP12	PFS	0.836843	4321
DLBC	MMP12	DSS	0.432497	4321
DLBC	MMP12	DFI	0.796126	4321
DLBC	MMP13	OS	0.663842	4322
DLBC	MMP13	PFS	0.836843	4322
DLBC	MMP13	DSS	0.432497	4322
DLBC	MMP13	DFI	0.796126	4322
DLBC	MMP14	OS	0.74655	4323
DLBC	MMP14	PFS	0.595644	4323
DLBC	MMP14	DSS	0.832681	4323
DLBC	MMP14	DFI	0.731601	4323
DLBC	MMP2	OS	0.171594	4313
DLBC	MMP2	PFS	0.427184	4313
DLBC	MMP2	DSS	0.666807	4313
DLBC	MMP2	DFI	0.0142642	4313
DLBC	MMP3	OS	0.663842	4314
DLBC	MMP3	PFS	0.836843	4314
DLBC	MMP3	DSS	0.432497	4314
DLBC	MMP3	DFI	0.796126	4314
DLBC	MMP9	OS	0.487399	4318
DLBC	MMP9	PFS	0.10376	4318
DLBC	MMP9	DSS	0.250477	4318
DLBC	MMP9	DFI	4.62309e-06	4318
DLBC	SERPINE1	OS	0.274537	5054
DLBC	SERPINE1	PFS	0.436056	5054
DLBC	SERPINE1	DSS	0.103729	5054
DLBC	SERPINE1	DFI	0.271805	5054
DLBC	SPP1	OS	0.333738	6696
DLBC	SPP1	PFS	0.136039	6696
DLBC	SPP1	DSS	0.457168	6696
DLBC	SPP1	DFI	0.0528075	6696
DLBC	TIMP2	OS	0.343199	7077
DLBC	TIMP2	PFS	0.898432	7077
DLBC	TIMP2	DSS	0.758488	7077
DLBC	TIMP2	DFI	0.316725	7077
DLBC	TNF	OS	0.997928	7124
DLBC	TNF	PFS	0.98635	7124
DLBC	TNF	DSS	0.646687	7124
DLBC	TNF	DFI	0.0241901	7124
DLBC	TNFRSF11B	OS	0.592927	4982
DLBC	TNFRSF11B	PFS	0.97279	4982
DLBC	TNFRSF11B	DSS	0.856786	4982
DLBC	TNFRSF11B	DFI	0.0240107	4982
ESCA	FGF2	OS	0.250088	2247
ESCA	FGF2	PFS	0.12132	2247
ESCA	FGF2	DSS	0.799936	2247
ESCA	FGF2	DFI	0.879518	2247
ESCA	ICAM1	OS	0.791539	3383
ESCA	ICAM1	PFS	0.579884	3383
ESCA	ICAM1	DSS	0.405549	3383
ESCA	ICAM1	DFI	0.880906	3383
ESCA	ICAM3	OS	0.79895	3385
ESCA	ICAM3	PFS	0.570228	3385
ESCA	ICAM3	DSS	0.410655	3385
ESCA	ICAM3	DFI	0.880906	3385
ESCA	ITGA2	OS	0.403648	3673
ESCA	ITGA2	PFS	0.599322	3673
ESCA	ITGA2	DSS	0.948481	3673
ESCA	ITGA2	DFI	0.937948	3673
ESCA	LCP1	OS	0.606879	3936
ESCA	LCP1	PFS	0.036973	3936
ESCA	LCP1	DSS	0.77708	3936
ESCA	LCP1	DFI	0.219375	3936
ESCA	MMP1	OS	0.726587	4312
ESCA	MMP1	PFS	0.673292	4312
ESCA	MMP1	DSS	0.513755	4312
ESCA	MMP1	DFI	0.531406	4312
ESCA	MMP10	OS	0.726587	4319
ESCA	MMP10	PFS	0.673292	4319
ESCA	MMP10	DSS	0.513755	4319
ESCA	MMP10	DFI	0.531406	4319
ESCA	MMP12	OS	0.726587	4321
ESCA	MMP12	PFS	0.673292	4321
ESCA	MMP12	DSS	0.513755	4321
ESCA	MMP12	DFI	0.531406	4321
ESCA	MMP13	OS	0.726587	4322
ESCA	MMP13	PFS	0.673292	4322
ESCA	MMP13	DSS	0.513755	4322
ESCA	MMP13	DFI	0.531406	4322
ESCA	MMP14	OS	0.857268	4323
ESCA	MMP14	PFS	0.250493	4323
ESCA	MMP14	DSS	0.921415	4323
ESCA	MMP14	DFI	0.302131	4323
ESCA	MMP2	OS	0.0528562	4313
ESCA	MMP2	PFS	0.0309317	4313
ESCA	MMP2	DSS	0.056384	4313
ESCA	MMP2	DFI	0.373041	4313
ESCA	MMP3	OS	0.726587	4314
ESCA	MMP3	PFS	0.673292	4314
ESCA	MMP3	DSS	0.513755	4314
ESCA	MMP3	DFI	0.531406	4314
ESCA	MMP9	OS	0.191261	4318
ESCA	MMP9	PFS	0.136617	4318
ESCA	MMP9	DSS	0.123562	4318
ESCA	MMP9	DFI	0.559644	4318
ESCA	SERPINE1	OS	0.216315	5054
ESCA	SERPINE1	PFS	0.453703	5054
ESCA	SERPINE1	DSS	0.623856	5054
ESCA	SERPINE1	DFI	0.634798	5054
ESCA	SPP1	OS	0.581093	6696
ESCA	SPP1	PFS	0.190973	6696
ESCA	SPP1	DSS	0.991784	6696
ESCA	SPP1	DFI	0.864152	6696
ESCA	TIMP2	OS	0.381576	7077
ESCA	TIMP2	PFS	0.661097	7077
ESCA	TIMP2	DSS	0.548426	7077
ESCA	TIMP2	DFI	0.755665	7077
ESCA	TNF	OS	0.855821	7124
ESCA	TNF	PFS	0.658155	7124
ESCA	TNF	DSS	0.870522	7124
ESCA	TNF	DFI	0.97076	7124
ESCA	TNFRSF11B	OS	0.773805	4982
ESCA	TNFRSF11B	PFS	0.533393	4982
ESCA	TNFRSF11B	DSS	0.972458	4982
ESCA	TNFRSF11B	DFI	0.476845	4982
GBM	FGF2	OS	0.184895	2247
GBM	FGF2	PFS	0.212764	2247
GBM	FGF2	DSS	0.165644	2247
GBM	ICAM1	OS	0.473239	3383
GBM	ICAM1	PFS	0.213381	3383
GBM	ICAM1	DSS	0.35369	3383
GBM	ICAM3	OS	0.446762	3385
GBM	ICAM3	PFS	0.247386	3385
GBM	ICAM3	DSS	0.340761	3385
GBM	ITGA2	OS	0.0777556	3673
GBM	ITGA2	PFS	0.289434	3673
GBM	ITGA2	DSS	0.0912802	3673
GBM	LCP1	OS	0.867976	3936
GBM	LCP1	PFS	0.945422	3936
GBM	LCP1	DSS	0.295012	3936
GBM	MMP1	OS	0.90616	4312
GBM	MMP1	PFS	0.70794	4312
GBM	MMP1	DSS	0.845217	4312
GBM	MMP10	OS	0.90616	4319
GBM	MMP10	PFS	0.70794	4319
GBM	MMP10	DSS	0.845217	4319
GBM	MMP12	OS	0.90616	4321
GBM	MMP12	PFS	0.70794	4321
GBM	MMP12	DSS	0.845217	4321
GBM	MMP13	OS	0.90616	4322
GBM	MMP13	PFS	0.70794	4322
GBM	MMP13	DSS	0.845217	4322
GBM	MMP14	OS	0.299921	4323
GBM	MMP14	PFS	0.280887	4323
GBM	MMP14	DSS	0.163724	4323
GBM	MMP2	OS	0.0690692	4313
GBM	MMP2	PFS	0.89381	4313
GBM	MMP2	DSS	0.0616939	4313
GBM	MMP3	OS	0.90616	4314
GBM	MMP3	PFS	0.70794	4314
GBM	MMP3	DSS	0.845217	4314
GBM	MMP9	OS	0.852569	4318
GBM	MMP9	PFS	0.474318	4318
GBM	MMP9	DSS	0.867173	4318
GBM	SERPINE1	OS	0.00529877	5054
GBM	SERPINE1	PFS	0.00720413	5054
GBM	SERPINE1	DSS	0.000338244	5054
GBM	SPP1	OS	0.0284167	6696
GBM	SPP1	PFS	0.0207271	6696
GBM	SPP1	DSS	0.0174156	6696
GBM	TIMP2	OS	0.236168	7077
GBM	TIMP2	PFS	0.747339	7077
GBM	TIMP2	DSS	0.0526156	7077
GBM	TNF	OS	0.00311055	7124
GBM	TNF	PFS	0.00229922	7124
GBM	TNF	DSS	0.0137695	7124
GBM	TNFRSF11B	OS	0.142727	4982
GBM	TNFRSF11B	PFS	0.0881118	4982
GBM	TNFRSF11B	DSS	0.0931054	4982
HNSC	FGF2	OS	0.634989	2247
HNSC	FGF2	PFS	0.314535	2247
HNSC	FGF2	DSS	0.892264	2247
HNSC	FGF2	DFI	0.204013	2247
HNSC	ICAM1	OS	0.000853363	3383
HNSC	ICAM1	PFS	0.0105105	3383
HNSC	ICAM1	DSS	0.0037827	3383
HNSC	ICAM1	DFI	0.507147	3383
HNSC	ICAM3	OS	0.000853363	3385
HNSC	ICAM3	PFS	0.0105105	3385
HNSC	ICAM3	DSS	0.0037827	3385
HNSC	ICAM3	DFI	0.507147	3385
HNSC	ITGA2	OS	0.793078	3673
HNSC	ITGA2	PFS	0.516813	3673
HNSC	ITGA2	DSS	0.533165	3673
HNSC	ITGA2	DFI	0.134143	3673
HNSC	LCP1	OS	0.536079	3936
HNSC	LCP1	PFS	0.97481	3936
HNSC	LCP1	DSS	0.0761285	3936
HNSC	LCP1	DFI	0.277322	3936
HNSC	MMP1	OS	0.865641	4312
HNSC	MMP1	PFS	0.825197	4312
HNSC	MMP1	DSS	0.827045	4312
HNSC	MMP1	DFI	0.209566	4312
HNSC	MMP10	OS	0.90077	4319
HNSC	MMP10	PFS	0.874799	4319
HNSC	MMP10	DSS	0.794525	4319
HNSC	MMP10	DFI	0.220528	4319
HNSC	MMP12	OS	0.866417	4321
HNSC	MMP12	PFS	0.792847	4321
HNSC	MMP12	DSS	0.858633	4321
HNSC	MMP12	DFI	0.178413	4321
HNSC	MMP13	OS	0.973206	4322
HNSC	MMP13	PFS	0.849282	4322
HNSC	MMP13	DSS	0.834722	4322
HNSC	MMP13	DFI	0.178413	4322
HNSC	MMP14	OS	0.303557	4323
HNSC	MMP14	PFS	0.361065	4323
HNSC	MMP14	DSS	0.466046	4323
HNSC	MMP14	DFI	0.434365	4323
HNSC	MMP2	OS	0.395175	4313
HNSC	MMP2	PFS	0.197558	4313
HNSC	MMP2	DSS	0.20802	4313
HNSC	MMP2	DFI	0.194708	4313
HNSC	MMP3	OS	0.866417	4314
HNSC	MMP3	PFS	0.792847	4314
HNSC	MMP3	DSS	0.858633	4314
HNSC	MMP3	DFI	0.178413	4314
HNSC	MMP9	OS	0.977235	4318
HNSC	MMP9	PFS	0.956656	4318
HNSC	MMP9	DSS	0.786328	4318
HNSC	MMP9	DFI	0.69667	4318
HNSC	SERPINE1	OS	0.0184026	5054
HNSC	SERPINE1	PFS	0.224808	5054
HNSC	SERPINE1	DSS	0.166917	5054
HNSC	SERPINE1	DFI	0.852706	5054
HNSC	SPP1	OS	0.651824	6696
HNSC	SPP1	PFS	0.31624	6696
HNSC	SPP1	DSS	0.73717	6696
HNSC	SPP1	DFI	0.353785	6696
HNSC	TIMP2	OS	0.798881	7077
HNSC	TIMP2	PFS	0.373152	7077
HNSC	TIMP2	DSS	0.601656	7077
HNSC	TIMP2	DFI	0.844601	7077
HNSC	TNF	OS	0.268767	7124
HNSC	TNF	PFS	0.228052	7124
HNSC	TNF	DSS	0.518753	7124
HNSC	TNF	DFI	0.932956	7124
HNSC	TNFRSF11B	OS	0.166135	4982
HNSC	TNFRSF11B	PFS	0.0707193	4982
HNSC	TNFRSF11B	DSS	0.130064	4982
HNSC	TNFRSF11B	DFI	0.513809	4982
KICH	FGF2	OS	0.571813	2247
KICH	FGF2	PFS	0.572214	2247
KICH	FGF2	DSS	0.898179	2247
KICH	FGF2	DFI	0.743756	2247
KICH	ICAM1	OS	0.0319415	3383
KICH	ICAM1	PFS	0.0253298	3383
KICH	ICAM1	DSS	0.0410236	3383
KICH	ICAM1	DFI	0.621335	3383
KICH	ICAM3	OS	0.0319415	3385
KICH	ICAM3	PFS	0.0253298	3385
KICH	ICAM3	DSS	0.0410236	3385
KICH	ICAM3	DFI	0.621335	3385
KICH	ITGA2	OS	0.0017238	3673
KICH	ITGA2	PFS	0.0106879	3673
KICH	ITGA2	DSS	0.000112367	3673
KICH	ITGA2	DFI	0.699431	3673
KICH	LCP1	OS	0.833545	3936
KICH	LCP1	PFS	0.789089	3936
KICH	LCP1	DSS	0.672202	3936
KICH	LCP1	DFI	0.952109	3936
KICH	MMP1	OS	0.691624	4312
KICH	MMP1	PFS	0.766661	4312
KICH	MMP1	DSS	0.353988	4312
KICH	MMP1	DFI	0.893743	4312
KICH	MMP10	OS	0.691624	4319
KICH	MMP10	PFS	0.766661	4319
KICH	MMP10	DSS	0.353988	4319
KICH	MMP10	DFI	0.893743	4319
KICH	MMP12	OS	0.691624	4321
KICH	MMP12	PFS	0.766661	4321
KICH	MMP12	DSS	0.353988	4321
KICH	MMP12	DFI	0.893743	4321
KICH	MMP13	OS	0.691624	4322
KICH	MMP13	PFS	0.766661	4322
KICH	MMP13	DSS	0.353988	4322
KICH	MMP13	DFI	0.893743	4322
KICH	MMP14	OS	0.53936	4323
KICH	MMP14	PFS	0.536584	4323
KICH	MMP14	DSS	0.659439	4323
KICH	MMP14	DFI	0.937906	4323
KICH	MMP2	OS	1.42418e-08	4313
KICH	MMP2	PFS	0	4313
KICH	MMP2	DSS	1.20538e-07	4313
KICH	MMP2	DFI	0.743756	4313
KICH	MMP3	OS	0.691624	4314
KICH	MMP3	PFS	0.766661	4314
KICH	MMP3	DSS	0.353988	4314
KICH	MMP3	DFI	0.893743	4314
KICH	MMP9	OS	0.357279	4318
KICH	MMP9	PFS	0.431897	4318
KICH	MMP9	DSS	0.338069	4318
KICH	MMP9	DFI	0.896725	4318
KICH	SERPINE1	OS	0.0273907	5054
KICH	SERPINE1	PFS	0.0505986	5054
KICH	SERPINE1	DSS	0.0261896	5054
KICH	SERPINE1	DFI	0.743756	5054
KICH	SPP1	OS	0.571813	6696
KICH	SPP1	PFS	0.572214	6696
KICH	SPP1	DSS	0.898179	6696
KICH	SPP1	DFI	0.743756	6696
KICH	TIMP2	OS	0.00185099	7077
KICH	TIMP2	PFS	1.0521e-05	7077
KICH	TIMP2	DSS	3.0209e-05	7077
KICH	TIMP2	DFI	0.393011	7077
KICH	TNF	OS	0.884618	7124
KICH	TNF	PFS	0.912005	7124
KICH	TNF	DSS	0.961297	7124
KICH	TNF	DFI	0.334232	7124
KICH	TNFRSF11B	OS	0.412142	4982
KICH	TNFRSF11B	PFS	0.319207	4982
KICH	TNFRSF11B	DSS	0.522725	4982
KICH	TNFRSF11B	DFI	0.485508	4982
KIRC	FGF2	OS	0.000147885	2247
KIRC	FGF2	PFS	1.05355e-06	2247
KIRC	FGF2	DSS	1.96437e-06	2247
KIRC	FGF2	DFI	0.438725	2247
KIRC	ICAM1	OS	1.80426e-06	3383
KIRC	ICAM1	PFS	0.00026389	3383
KIRC	ICAM1	DSS	3.03256e-09	3383
KIRC	ICAM1	DFI	0.81447	3383
KIRC	ICAM3	OS	1.80426e-06	3385
KIRC	ICAM3	PFS	0.00026389	3385
KIRC	ICAM3	DSS	3.03256e-09	3385
KIRC	ICAM3	DFI	0.81447	3385
KIRC	ITGA2	OS	0.0386032	3673
KIRC	ITGA2	PFS	0.223857	3673
KIRC	ITGA2	DSS	0.00884113	3673
KIRC	ITGA2	DFI	0.167474	3673
KIRC	LCP1	OS	0.00527564	3936
KIRC	LCP1	PFS	0.0458441	3936
KIRC	LCP1	DSS	0.000125162	3936
KIRC	LCP1	DFI	0.381791	3936
KIRC	MMP1	OS	0.0157609	4312
KIRC	MMP1	PFS	0.164845	4312
KIRC	MMP1	DSS	0.00782816	4312
KIRC	MMP1	DFI	0.759925	4312
KIRC	MMP10	OS	0.0157609	4319
KIRC	MMP10	PFS	0.164845	4319
KIRC	MMP10	DSS	0.00782816	4319
KIRC	MMP10	DFI	0.759925	4319
KIRC	MMP12	OS	0.0157609	4321
KIRC	MMP12	PFS	0.164845	4321
KIRC	MMP12	DSS	0.00782816	4321
KIRC	MMP12	DFI	0.759925	4321
KIRC	MMP13	OS	0.0157609	4322
KIRC	MMP13	PFS	0.164845	4322
KIRC	MMP13	DSS	0.00782816	4322
KIRC	MMP13	DFI	0.759925	4322
KIRC	MMP14	OS	0.00068447	4323
KIRC	MMP14	PFS	0.00017312	4323
KIRC	MMP14	DSS	0.000604554	4323
KIRC	MMP14	DFI	0.487004	4323
KIRC	MMP2	OS	0.176742	4313
KIRC	MMP2	PFS	0.0310817	4313
KIRC	MMP2	DSS	0.0362374	4313
KIRC	MMP2	DFI	0.515697	4313
KIRC	MMP3	OS	0.0157609	4314
KIRC	MMP3	PFS	0.164845	4314
KIRC	MMP3	DSS	0.00782816	4314
KIRC	MMP3	DFI	0.759925	4314
KIRC	MMP9	OS	0.0549735	4318
KIRC	MMP9	PFS	0.00347619	4318
KIRC	MMP9	DSS	0.00167361	4318
KIRC	MMP9	DFI	0.553631	4318
KIRC	SERPINE1	OS	0	5054
KIRC	SERPINE1	PFS	6.08331e-11	5054
KIRC	SERPINE1	DSS	0	5054
KIRC	SERPINE1	DFI	0.255564	5054
KIRC	SPP1	OS	2.9357e-05	6696
KIRC	SPP1	PFS	4.03678e-08	6696
KIRC	SPP1	DSS	8.10052e-07	6696
KIRC	SPP1	DFI	0.224371	6696
KIRC	TIMP2	OS	0.184278	7077
KIRC	TIMP2	PFS	0.639348	7077
KIRC	TIMP2	DSS	0.409118	7077
KIRC	TIMP2	DFI	0.945088	7077
KIRC	TNF	OS	0.719886	7124
KIRC	TNF	PFS	0.275346	7124
KIRC	TNF	DSS	0.680401	7124
KIRC	TNF	DFI	0.338243	7124
KIRC	TNFRSF11B	OS	0.0287377	4982
KIRC	TNFRSF11B	PFS	0.00499085	4982
KIRC	TNFRSF11B	DSS	0.00170683	4982
KIRC	TNFRSF11B	DFI	0.895238	4982
KIRP	FGF2	OS	1.61097e-07	2247
KIRP	FGF2	PFS	2.25846e-06	2247
KIRP	FGF2	DSS	1.08963e-10	2247
KIRP	FGF2	DFI	1.8578e-05	2247
KIRP	ICAM1	OS	0.184088	3383
KIRP	ICAM1	PFS	0.83419	3383
KIRP	ICAM1	DSS	0.0185331	3383
KIRP	ICAM1	DFI	0.12983	3383
KIRP	ICAM3	OS	0.184088	3385
KIRP	ICAM3	PFS	0.83419	3385
KIRP	ICAM3	DSS	0.0185331	3385
KIRP	ICAM3	DFI	0.12983	3385
KIRP	ITGA2	OS	7.01846e-07	3673
KIRP	ITGA2	PFS	0.000438341	3673
KIRP	ITGA2	DSS	1.47332e-08	3673
KIRP	ITGA2	DFI	0.0737001	3673
KIRP	LCP1	OS	3.2761e-05	3936
KIRP	LCP1	PFS	3.88256e-07	3936
KIRP	LCP1	DSS	1.03982e-07	3936
KIRP	LCP1	DFI	1.9035e-05	3936
KIRP	MMP1	OS	3.1992e-05	4312
KIRP	MMP1	PFS	0.00348505	4312
KIRP	MMP1	DSS	1.79645e-09	4312
KIRP	MMP1	DFI	0.000118223	4312
KIRP	MMP10	OS	3.1992e-05	4319
KIRP	MMP10	PFS	0.00348505	4319
KIRP	MMP10	DSS	1.79645e-09	4319
KIRP	MMP10	DFI	0.000118223	4319
KIRP	MMP12	OS	3.1992e-05	4321
KIRP	MMP12	PFS	0.00348505	4321
KIRP	MMP12	DSS	1.79645e-09	4321
KIRP	MMP12	DFI	0.000118223	4321
KIRP	MMP13	OS	3.1992e-05	4322
KIRP	MMP13	PFS	0.00348505	4322
KIRP	MMP13	DSS	1.79645e-09	4322
KIRP	MMP13	DFI	0.000118223	4322
KIRP	MMP14	OS	0.000318831	4323
KIRP	MMP14	PFS	0.00546846	4323
KIRP	MMP14	DSS	8.29948e-06	4323
KIRP	MMP14	DFI	0.022182	4323
KIRP	MMP2	OS	7.1592e-05	4313
KIRP	MMP2	PFS	2.64794e-06	4313
KIRP	MMP2	DSS	6.25371e-07	4313
KIRP	MMP2	DFI	6.80228e-08	4313
KIRP	MMP3	OS	3.1992e-05	4314
KIRP	MMP3	PFS	0.00348505	4314
KIRP	MMP3	DSS	1.79645e-09	4314
KIRP	MMP3	DFI	0.000118223	4314
KIRP	MMP9	OS	0.482803	4318
KIRP	MMP9	PFS	0.200309	4318
KIRP	MMP9	DSS	0.57709	4318
KIRP	MMP9	DFI	0.510867	4318
KIRP	SERPINE1	OS	0.0011667	5054
KIRP	SERPINE1	PFS	0.0110106	5054
KIRP	SERPINE1	DSS	1.3625e-05	5054
KIRP	SERPINE1	DFI	0.000121257	5054
KIRP	SPP1	OS	5.70244e-08	6696
KIRP	SPP1	PFS	6.30433e-07	6696
KIRP	SPP1	DSS	2.22667e-11	6696
KIRP	SPP1	DFI	3.28725e-06	6696
KIRP	TIMP2	OS	0.46969	7077
KIRP	TIMP2	PFS	0.427177	7077
KIRP	TIMP2	DSS	0.618778	7077
KIRP	TIMP2	DFI	0.530082	7077
KIRP	TNF	OS	1.6791e-07	7124
KIRP	TNF	PFS	0.000125693	7124
KIRP	TNF	DSS	2.71529e-08	7124
KIRP	TNF	DFI	1.28786e-14	7124
KIRP	TNFRSF11B	OS	5.00008e-07	4982
KIRP	TNFRSF11B	PFS	3.1651e-05	4982
KIRP	TNFRSF11B	DSS	5.3965e-08	4982
KIRP	TNFRSF11B	DFI	0.00381792	4982
LAML	FGF2	OS	0.000199129	2247
LAML	ICAM1	OS	0.468564	3383
LAML	ICAM3	OS	0.468564	3385
LAML	ITGA2	OS	0.167345	3673
LAML	LCP1	OS	0.000150206	3936
LAML	MMP1	OS	0.205036	4312
LAML	MMP10	OS	0.205036	4319
LAML	MMP12	OS	0.205036	4321
LAML	MMP13	OS	0.205036	4322
LAML	MMP14	OS	3.6083e-05	4323
LAML	MMP2	OS	0.0108974	4313
LAML	MMP3	OS	0.205036	4314
LAML	MMP9	OS	0.0118779	4318
LAML	SERPINE1	OS	0.0105488	5054
LAML	SPP1	OS	0.000199129	6696
LAML	TIMP2	OS	0.0403947	7077
LAML	TNFRSF11B	OS	0.0262061	4982
LGG	FGF2	OS	0.518638	2247
LGG	FGF2	PFS	0.278268	2247
LGG	FGF2	DSS	0.3662	2247
LGG	FGF2	DFI	0.174832	2247
LGG	ICAM1	OS	0.9458	3383
LGG	ICAM1	PFS	0.999152	3383
LGG	ICAM1	DSS	0.901217	3383
LGG	ICAM1	DFI	0.910991	3383
LGG	ICAM3	OS	0.889984	3385
LGG	ICAM3	PFS	0.965379	3385
LGG	ICAM3	DSS	0.871146	3385
LGG	ICAM3	DFI	0.770218	3385
LGG	ITGA2	OS	0.0654646	3673
LGG	ITGA2	PFS	0.354256	3673
LGG	ITGA2	DSS	0.0416287	3673
LGG	ITGA2	DFI	0.570549	3673
LGG	LCP1	OS	0.0350319	3936
LGG	LCP1	PFS	0.0686884	3936
LGG	LCP1	DSS	0.0224655	3936
LGG	LCP1	DFI	0.481523	3936
LGG	MMP1	OS	0.00115268	4312
LGG	MMP1	PFS	0.00118847	4312
LGG	MMP1	DSS	0.00131165	4312
LGG	MMP1	DFI	0.639393	4312
LGG	MMP10	OS	0.00115268	4319
LGG	MMP10	PFS	0.00118847	4319
LGG	MMP10	DSS	0.00131165	4319
LGG	MMP10	DFI	0.639393	4319
LGG	MMP12	OS	0.00115268	4321
LGG	MMP12	PFS	0.00118847	4321
LGG	MMP12	DSS	0.00131165	4321
LGG	MMP12	DFI	0.639393	4321
LGG	MMP13	OS	0.0023858	4322
LGG	MMP13	PFS	0.00414337	4322
LGG	MMP13	DSS	0.00284815	4322
LGG	MMP13	DFI	0.639393	4322
LGG	MMP14	OS	6.78981e-09	4323
LGG	MMP14	PFS	1.29044e-06	4323
LGG	MMP14	DSS	1.20847e-10	4323
LGG	MMP14	DFI	0.152346	4323
LGG	MMP2	OS	0.183727	4313
LGG	MMP2	PFS	0.0806688	4313
LGG	MMP2	DSS	0.233224	4313
LGG	MMP2	DFI	0.0437313	4313
LGG	MMP3	OS	0.00115268	4314
LGG	MMP3	PFS	0.00118847	4314
LGG	MMP3	DSS	0.00131165	4314
LGG	MMP3	DFI	0.639393	4314
LGG	MMP9	OS	1.5785e-08	4318
LGG	MMP9	PFS	0.000658762	4318
LGG	MMP9	DSS	7.55026e-08	4318
LGG	MMP9	DFI	0.271598	4318
LGG	SERPINE1	OS	0.000123787	5054
LGG	SERPINE1	PFS	1.0194e-05	5054
LGG	SERPINE1	DSS	2.5166e-05	5054
LGG	SERPINE1	DFI	0.00691337	5054
LGG	SPP1	OS	0.286422	6696
LGG	SPP1	PFS	0.407668	6696
LGG	SPP1	DSS	0.233119	6696
LGG	SPP1	DFI	0.222456	6696
LGG	TIMP2	OS	0.151262	7077
LGG	TIMP2	PFS	0.270105	7077
LGG	TIMP2	DSS	0.15567	7077
LGG	TIMP2	DFI	0.950087	7077
LGG	TNF	OS	0.000142261	7124
LGG	TNF	PFS	6.89768e-06	7124
LGG	TNF	DSS	0.00016721	7124
LGG	TNF	DFI	0.0144433	7124
LGG	TNFRSF11B	OS	0.144433	4982
LGG	TNFRSF11B	PFS	0.0546565	4982
LGG	TNFRSF11B	DSS	0.119761	4982
LGG	TNFRSF11B	DFI	0.033754	4982
LIHC	FGF2	OS	0.079642	2247
LIHC	FGF2	PFS	0.681119	2247
LIHC	FGF2	DSS	0.033144	2247
LIHC	FGF2	DFI	0.821252	2247
LIHC	ICAM1	OS	0.203235	3383
LIHC	ICAM1	PFS	0.243232	3383
LIHC	ICAM1	DSS	0.0786113	3383
LIHC	ICAM1	DFI	0.0782069	3383
LIHC	ICAM3	OS	0.182341	3385
LIHC	ICAM3	PFS	0.244547	3385
LIHC	ICAM3	DSS	0.0687032	3385
LIHC	ICAM3	DFI	0.0706958	3385
LIHC	ITGA2	OS	0.00605172	3673
LIHC	ITGA2	PFS	0.110619	3673
LIHC	ITGA2	DSS	0.018273	3673
LIHC	ITGA2	DFI	0.255779	3673
LIHC	LCP1	OS	0.0267427	3936
LIHC	LCP1	PFS	0.136027	3936
LIHC	LCP1	DSS	0.00096759	3936
LIHC	LCP1	DFI	0.490139	3936
LIHC	MMP1	OS	0.606275	4312
LIHC	MMP1	PFS	0.717652	4312
LIHC	MMP1	DSS	0.172724	4312
LIHC	MMP1	DFI	0.836785	4312
LIHC	MMP10	OS	0.606275	4319
LIHC	MMP10	PFS	0.717652	4319
LIHC	MMP10	DSS	0.172724	4319
LIHC	MMP10	DFI	0.836785	4319
LIHC	MMP12	OS	0.472131	4321
LIHC	MMP12	PFS	0.464854	4321
LIHC	MMP12	DSS	0.114234	4321
LIHC	MMP12	DFI	0.649335	4321
LIHC	MMP13	OS	0.472131	4322
LIHC	MMP13	PFS	0.464854	4322
LIHC	MMP13	DSS	0.114234	4322
LIHC	MMP13	DFI	0.649335	4322
LIHC	MMP14	OS	0.0385351	4323
LIHC	MMP14	PFS	0.0442945	4323
LIHC	MMP14	DSS	0.0148243	4323
LIHC	MMP14	DFI	0.0418795	4323
LIHC	MMP2	OS	0.306066	4313
LIHC	MMP2	PFS	0.417246	4313
LIHC	MMP2	DSS	0.302119	4313
LIHC	MMP2	DFI	0.934653	4313
LIHC	MMP3	OS	0.472131	4314
LIHC	MMP3	PFS	0.464854	4314
LIHC	MMP3	DSS	0.114234	4314
LIHC	MMP3	DFI	0.649335	4314
LIHC	MMP9	OS	0.117445	4318
LIHC	MMP9	PFS	0.0819474	4318
LIHC	MMP9	DSS	0.0747219	4318
LIHC	MMP9	DFI	0.126212	4318
LIHC	SERPINE1	OS	0.0285188	5054
LIHC	SERPINE1	PFS	0.0237488	5054
LIHC	SERPINE1	DSS	0.0490078	5054
LIHC	SERPINE1	DFI	0.629285	5054
LIHC	SPP1	OS	0.287134	6696
LIHC	SPP1	PFS	0.957601	6696
LIHC	SPP1	DSS	0.203025	6696
LIHC	SPP1	DFI	0.929967	6696
LIHC	TIMP2	OS	0.0280564	7077
LIHC	TIMP2	PFS	0.0116587	7077
LIHC	TIMP2	DSS	0.0192196	7077
LIHC	TIMP2	DFI	0.010543	7077
LIHC	TNF	OS	0.000752268	7124
LIHC	TNF	PFS	0.0154608	7124
LIHC	TNF	DSS	3.32245e-12	7124
LIHC	TNF	DFI	0.000701232	7124
LIHC	TNFRSF11B	OS	0.530262	4982
LIHC	TNFRSF11B	PFS	0.537724	4982
LIHC	TNFRSF11B	DSS	0.811342	4982
LIHC	TNFRSF11B	DFI	0.739922	4982
LUAD	FGF2	OS	0.148807	2247
LUAD	FGF2	PFS	0.260302	2247
LUAD	FGF2	DSS	0.271364	2247
LUAD	FGF2	DFI	0.329688	2247
LUAD	ICAM1	OS	0.77212	3383
LUAD	ICAM1	PFS	0.713872	3383
LUAD	ICAM1	DSS	0.869202	3383
LUAD	ICAM1	DFI	0.859747	3383
LUAD	ICAM3	OS	0.775395	3385
LUAD	ICAM3	PFS	0.73371	3385
LUAD	ICAM3	DSS	0.816424	3385
LUAD	ICAM3	DFI	0.802644	3385
LUAD	ITGA2	OS	0.0375565	3673
LUAD	ITGA2	PFS	0.0359243	3673
LUAD	ITGA2	DSS	0.0538055	3673
LUAD	ITGA2	DFI	0.451006	3673
LUAD	LCP1	OS	0.95687	3936
LUAD	LCP1	PFS	0.633754	3936
LUAD	LCP1	DSS	0.45849	3936
LUAD	LCP1	DFI	0.278103	3936
LUAD	MMP1	OS	0.29116	4312
LUAD	MMP1	PFS	0.116586	4312
LUAD	MMP1	DSS	0.362409	4312
LUAD	MMP1	DFI	0.0123189	4312
LUAD	MMP10	OS	0.285969	4319
LUAD	MMP10	PFS	0.107697	4319
LUAD	MMP10	DSS	0.356421	4319
LUAD	MMP10	DFI	0.0112638	4319
LUAD	MMP12	OS	0.29116	4321
LUAD	MMP12	PFS	0.116586	4321
LUAD	MMP12	DSS	0.362409	4321
LUAD	MMP12	DFI	0.0123189	4321
LUAD	MMP13	OS	0.271666	4322
LUAD	MMP13	PFS	0.108847	4322
LUAD	MMP13	DSS	0.346908	4322
LUAD	MMP13	DFI	0.0123189	4322
LUAD	MMP14	OS	0.521223	4323
LUAD	MMP14	PFS	0.203821	4323
LUAD	MMP14	DSS	0.996275	4323
LUAD	MMP14	DFI	0.37509	4323
LUAD	MMP2	OS	0.919098	4313
LUAD	MMP2	PFS	0.588792	4313
LUAD	MMP2	DSS	0.825534	4313
LUAD	MMP2	DFI	0.745031	4313
LUAD	MMP3	OS	0.29116	4314
LUAD	MMP3	PFS	0.116586	4314
LUAD	MMP3	DSS	0.362409	4314
LUAD	MMP3	DFI	0.0123189	4314
LUAD	MMP9	OS	0.311577	4318
LUAD	MMP9	PFS	0.76464	4318
LUAD	MMP9	DSS	0.148219	4318
LUAD	MMP9	DFI	0.807039	4318
LUAD	SERPINE1	OS	0.464201	5054
LUAD	SERPINE1	PFS	0.709096	5054
LUAD	SERPINE1	DSS	0.809655	5054
LUAD	SERPINE1	DFI	0.481503	5054
LUAD	SPP1	OS	0.373287	6696
LUAD	SPP1	PFS	0.197577	6696
LUAD	SPP1	DSS	0.569555	6696
LUAD	SPP1	DFI	0.399369	6696
LUAD	TIMP2	OS	0.232809	7077
LUAD	TIMP2	PFS	0.277542	7077
LUAD	TIMP2	DSS	0.41104	7077
LUAD	TIMP2	DFI	0.162637	7077
LUAD	TNF	OS	0.319689	7124
LUAD	TNF	PFS	0.0983733	7124
LUAD	TNF	DSS	0.289258	7124
LUAD	TNF	DFI	0.360313	7124
LUAD	TNFRSF11B	OS	0.0744463	4982
LUAD	TNFRSF11B	PFS	0.393439	4982
LUAD	TNFRSF11B	DSS	0.156256	4982
LUAD	TNFRSF11B	DFI	0.774685	4982
LUSC	FGF2	OS	0.433356	2247
LUSC	FGF2	PFS	0.781345	2247
LUSC	FGF2	DSS	0.775916	2247
LUSC	FGF2	DFI	0.158934	2247
LUSC	ICAM1	OS	0.201268	3383
LUSC	ICAM1	PFS	0.0157043	3383
LUSC	ICAM1	DSS	0.0728911	3383
LUSC	ICAM1	DFI	0.282179	3383
LUSC	ICAM3	OS	0.150549	3385
LUSC	ICAM3	PFS	0.00916685	3385
LUSC	ICAM3	DSS	0.048579	3385
LUSC	ICAM3	DFI	0.261654	3385
LUSC	ITGA2	OS	0.625084	3673
LUSC	ITGA2	PFS	0.644386	3673
LUSC	ITGA2	DSS	0.0486558	3673
LUSC	ITGA2	DFI	0.0486943	3673
LUSC	LCP1	OS	0.288951	3936
LUSC	LCP1	PFS	0.114465	3936
LUSC	LCP1	DSS	0.0200049	3936
LUSC	LCP1	DFI	0.0112388	3936
LUSC	MMP1	OS	0.577999	4312
LUSC	MMP1	PFS	0.562842	4312
LUSC	MMP1	DSS	0.361652	4312
LUSC	MMP1	DFI	0.82051	4312
LUSC	MMP10	OS	0.661724	4319
LUSC	MMP10	PFS	0.6026	4319
LUSC	MMP10	DSS	0.361652	4319
LUSC	MMP10	DFI	0.82051	4319
LUSC	MMP12	OS	0.581557	4321
LUSC	MMP12	PFS	0.567107	4321
LUSC	MMP12	DSS	0.361652	4321
LUSC	MMP12	DFI	0.82051	4321
LUSC	MMP13	OS	0.50839	4322
LUSC	MMP13	PFS	0.528789	4322
LUSC	MMP13	DSS	0.305252	4322
LUSC	MMP13	DFI	0.82051	4322
LUSC	MMP14	OS	0.0907557	4323
LUSC	MMP14	PFS	0.209517	4323
LUSC	MMP14	DSS	0.939136	4323
LUSC	MMP14	DFI	0.265716	4323
LUSC	MMP2	OS	0.257157	4313
LUSC	MMP2	PFS	0.352674	4313
LUSC	MMP2	DSS	0.393368	4313
LUSC	MMP2	DFI	0.825623	4313
LUSC	MMP3	OS	0.577999	4314
LUSC	MMP3	PFS	0.562842	4314
LUSC	MMP3	DSS	0.361652	4314
LUSC	MMP3	DFI	0.82051	4314
LUSC	MMP9	OS	0.487024	4318
LUSC	MMP9	PFS	0.79035	4318
LUSC	MMP9	DSS	0.160085	4318
LUSC	MMP9	DFI	0.484136	4318
LUSC	SERPINE1	OS	0.109767	5054
LUSC	SERPINE1	PFS	0.168433	5054
LUSC	SERPINE1	DSS	0.0537075	5054
LUSC	SERPINE1	DFI	0.458543	5054
LUSC	SPP1	OS	0.646661	6696
LUSC	SPP1	PFS	0.888114	6696
LUSC	SPP1	DSS	0.952113	6696
LUSC	SPP1	DFI	0.572415	6696
LUSC	TIMP2	OS	0.155488	7077
LUSC	TIMP2	PFS	0.10375	7077
LUSC	TIMP2	DSS	0.120209	7077
LUSC	TIMP2	DFI	0.0207452	7077
LUSC	TNF	OS	0.887365	7124
LUSC	TNF	PFS	0.677512	7124
LUSC	TNF	DSS	0.539731	7124
LUSC	TNF	DFI	0.984956	7124
LUSC	TNFRSF11B	OS	0.536789	4982
LUSC	TNFRSF11B	PFS	0.31884	4982
LUSC	TNFRSF11B	DSS	0.521405	4982
LUSC	TNFRSF11B	DFI	0.162772	4982
MESO	FGF2	OS	0.00053511	2247
MESO	FGF2	PFS	0.0112274	2247
MESO	FGF2	DSS	5.01821e-14	2247
MESO	ICAM1	OS	0.319523	3383
MESO	ICAM1	PFS	0.921907	3383
MESO	ICAM1	DSS	0.12834	3383
MESO	ICAM3	OS	0.319523	3385
MESO	ICAM3	PFS	0.921907	3385
MESO	ICAM3	DSS	0.12834	3385
MESO	ITGA2	OS	0.0160972	3673
MESO	ITGA2	PFS	0.224159	3673
MESO	ITGA2	DSS	0.0608121	3673
MESO	ITGA2	DFI	0.0574089	3673
MESO	LCP1	OS	0.090283	3936
MESO	LCP1	PFS	0.179217	3936
MESO	LCP1	DSS	0.0465786	3936
MESO	LCP1	DFI	0.618492	3936
MESO	MMP1	OS	0.141424	4312
MESO	MMP1	PFS	0.253848	4312
MESO	MMP1	DSS	0.206445	4312
MESO	MMP1	DFI	0.0143059	4312
MESO	MMP10	OS	0.141424	4319
MESO	MMP10	PFS	0.253848	4319
MESO	MMP10	DSS	0.206445	4319
MESO	MMP10	DFI	0.0143059	4319
MESO	MMP12	OS	0.141424	4321
MESO	MMP12	PFS	0.253848	4321
MESO	MMP12	DSS	0.206445	4321
MESO	MMP12	DFI	0.0143059	4321
MESO	MMP13	OS	0.534788	4322
MESO	MMP13	PFS	0.891129	4322
MESO	MMP13	DSS	0.289609	4322
MESO	MMP13	DFI	0.0143059	4322
MESO	MMP14	OS	3.40728e-06	4323
MESO	MMP14	PFS	0.000558055	4323
MESO	MMP14	DSS	7.77156e-15	4323
MESO	MMP14	DFI	0.449878	4323
MESO	MMP2	OS	0.124324	4313
MESO	MMP2	PFS	0.445393	4313
MESO	MMP2	DSS	0.517586	4313
MESO	MMP2	DFI	0.0399648	4313
MESO	MMP3	OS	0.141424	4314
MESO	MMP3	PFS	0.253848	4314
MESO	MMP3	DSS	0.206445	4314
MESO	MMP3	DFI	0.0143059	4314
MESO	MMP9	OS	0.0536392	4318
MESO	MMP9	PFS	0.246352	4318
MESO	MMP9	DSS	0.184155	4318
MESO	SERPINE1	OS	0.184534	5054
MESO	SERPINE1	PFS	0.280111	5054
MESO	SERPINE1	DSS	0.594218	5054
MESO	SERPINE1	DFI	0.701486	5054
MESO	SPP1	OS	0.000182906	6696
MESO	SPP1	PFS	0.00316045	6696
MESO	SPP1	DSS	3.05311e-14	6696
MESO	SPP1	DFI	0.0143059	6696
MESO	TIMP2	OS	0.192527	7077
MESO	TIMP2	PFS	0.290943	7077
MESO	TIMP2	DSS	0.194474	7077
MESO	TIMP2	DFI	0.374982	7077
MESO	TNF	OS	0.0107193	7124
MESO	TNF	PFS	0.211213	7124
MESO	TNF	DSS	0.0145178	7124
MESO	TNFRSF11B	OS	0.23661	4982
MESO	TNFRSF11B	PFS	0.555163	4982
MESO	TNFRSF11B	DSS	0.768339	4982
MESO	TNFRSF11B	DFI	0.092892	4982
OV	FGF2	OS	0.617804	2247
OV	FGF2	PFS	0.612914	2247
OV	FGF2	DSS	0.749081	2247
OV	FGF2	DFI	0.679415	2247
OV	ICAM1	OS	0.0326064	3383
OV	ICAM1	PFS	0.370948	3383
OV	ICAM1	DSS	0.0500015	3383
OV	ICAM1	DFI	0.85905	3383
OV	ICAM3	OS	0.0510512	3385
OV	ICAM3	PFS	0.237829	3385
OV	ICAM3	DSS	0.097643	3385
OV	ICAM3	DFI	0.963656	3385
OV	ITGA2	OS	0.482375	3673
OV	ITGA2	PFS	0.864622	3673
OV	ITGA2	DSS	0.492907	3673
OV	ITGA2	DFI	0.801787	3673
OV	LCP1	OS	0.0142117	3936
OV	LCP1	PFS	0.173718	3936
OV	LCP1	DSS	0.00848127	3936
OV	LCP1	DFI	0.663523	3936
OV	MMP1	OS	0.391798	4312
OV	MMP1	PFS	0.704817	4312
OV	MMP1	DSS	0.324029	4312
OV	MMP1	DFI	0.806116	4312
OV	MMP10	OS	0.343994	4319
OV	MMP10	PFS	0.682908	4319
OV	MMP10	DSS	0.275408	4319
OV	MMP10	DFI	0.87309	4319
OV	MMP12	OS	0.421579	4321
OV	MMP12	PFS	0.662052	4321
OV	MMP12	DSS	0.324029	4321
OV	MMP12	DFI	0.806116	4321
OV	MMP13	OS	0.519354	4322
OV	MMP13	PFS	0.783907	4322
OV	MMP13	DSS	0.413318	4322
OV	MMP13	DFI	0.782518	4322
OV	MMP14	OS	0.0422561	4323
OV	MMP14	PFS	0.107067	4323
OV	MMP14	DSS	0.0668921	4323
OV	MMP14	DFI	0.177106	4323
OV	MMP2	OS	0.317175	4313
OV	MMP2	PFS	0.517201	4313
OV	MMP2	DSS	0.266119	4313
OV	MMP2	DFI	0.947107	4313
OV	MMP3	OS	0.391798	4314
OV	MMP3	PFS	0.704817	4314
OV	MMP3	DSS	0.324029	4314
OV	MMP3	DFI	0.806116	4314
OV	MMP9	OS	0.19776	4318
OV	MMP9	PFS	0.528009	4318
OV	MMP9	DSS	0.176844	4318
OV	MMP9	DFI	0.917816	4318
OV	SERPINE1	OS	0.0876829	5054
OV	SERPINE1	PFS	0.193796	5054
OV	SERPINE1	DSS	0.231496	5054
OV	SERPINE1	DFI	0.0942148	5054
OV	SPP1	OS	0.0334169	6696
OV	SPP1	PFS	0.038273	6696
OV	SPP1	DSS	0.0543782	6696
OV	SPP1	DFI	0.577884	6696
OV	TIMP2	OS	0.429346	7077
OV	TIMP2	PFS	0.836622	7077
OV	TIMP2	DSS	0.333356	7077
OV	TIMP2	DFI	0.965176	7077
OV	TNF	OS	0.0713719	7124
OV	TNF	PFS	0.837802	7124
OV	TNF	DSS	0.0764657	7124
OV	TNF	DFI	0.864626	7124
OV	TNFRSF11B	OS	0.221562	4982
OV	TNFRSF11B	PFS	0.572031	4982
OV	TNFRSF11B	DSS	0.318055	4982
OV	TNFRSF11B	DFI	0.903199	4982
PAAD	FGF2	OS	0.191283	2247
PAAD	FGF2	PFS	0.0479212	2247
PAAD	FGF2	DSS	0.267603	2247
PAAD	FGF2	DFI	0.469153	2247
PAAD	ICAM1	OS	0.401213	3383
PAAD	ICAM1	PFS	0.226857	3383
PAAD	ICAM1	DSS	0.366379	3383
PAAD	ICAM1	DFI	0.822753	3383
PAAD	ICAM3	OS	0.401213	3385
PAAD	ICAM3	PFS	0.226857	3385
PAAD	ICAM3	DSS	0.366379	3385
PAAD	ICAM3	DFI	0.822753	3385
PAAD	ITGA2	OS	0.0996927	3673
PAAD	ITGA2	PFS	0.0587381	3673
PAAD	ITGA2	DSS	0.0765101	3673
PAAD	ITGA2	DFI	0.0931869	3673
PAAD	LCP1	OS	0.589327	3936
PAAD	LCP1	PFS	0.665249	3936
PAAD	LCP1	DSS	0.865841	3936
PAAD	LCP1	DFI	0.996646	3936
PAAD	MMP1	OS	0.030957	4312
PAAD	MMP1	PFS	0.1609	4312
PAAD	MMP1	DSS	0.140552	4312
PAAD	MMP1	DFI	0.921408	4312
PAAD	MMP10	OS	0.030957	4319
PAAD	MMP10	PFS	0.1609	4319
PAAD	MMP10	DSS	0.140552	4319
PAAD	MMP10	DFI	0.921408	4319
PAAD	MMP12	OS	0.0397589	4321
PAAD	MMP12	PFS	0.124091	4321
PAAD	MMP12	DSS	0.174107	4321
PAAD	MMP12	DFI	0.616732	4321
PAAD	MMP13	OS	0.0292741	4322
PAAD	MMP13	PFS	0.0907137	4322
PAAD	MMP13	DSS	0.15234	4322
PAAD	MMP13	DFI	0.616732	4322
PAAD	MMP14	OS	0.629909	4323
PAAD	MMP14	PFS	0.906999	4323
PAAD	MMP14	DSS	0.230736	4323
PAAD	MMP14	DFI	0.822984	4323
PAAD	MMP2	OS	0.197627	4313
PAAD	MMP2	PFS	0.088601	4313
PAAD	MMP2	DSS	0.310103	4313
PAAD	MMP2	DFI	0.0969665	4313
PAAD	MMP3	OS	0.030957	4314
PAAD	MMP3	PFS	0.1609	4314
PAAD	MMP3	DSS	0.140552	4314
PAAD	MMP3	DFI	0.921408	4314
PAAD	MMP9	OS	0.447455	4318
PAAD	MMP9	PFS	0.360277	4318
PAAD	MMP9	DSS	0.396109	4318
PAAD	MMP9	DFI	0.410709	4318
PAAD	SERPINE1	OS	0.812579	5054
PAAD	SERPINE1	PFS	0.577134	5054
PAAD	SERPINE1	DSS	0.940766	5054
PAAD	SERPINE1	DFI	0.938793	5054
PAAD	SPP1	OS	0.144078	6696
PAAD	SPP1	PFS	0.0290808	6696
PAAD	SPP1	DSS	0.0964114	6696
PAAD	SPP1	DFI	0.48561	6696
PAAD	TIMP2	OS	0.0413714	7077
PAAD	TIMP2	PFS	0.228485	7077
PAAD	TIMP2	DSS	0.0708409	7077
PAAD	TIMP2	DFI	0.942931	7077
PAAD	TNF	OS	0.414557	7124
PAAD	TNF	PFS	0.171459	7124
PAAD	TNF	DSS	0.341122	7124
PAAD	TNF	DFI	0.181607	7124
PAAD	TNFRSF11B	OS	0.296532	4982
PAAD	TNFRSF11B	PFS	0.360759	4982
PAAD	TNFRSF11B	DSS	0.753137	4982
PAAD	TNFRSF11B	DFI	0.186081	4982
PCPG	FGF2	OS	0.821418	2247
PCPG	FGF2	PFS	0.274055	2247
PCPG	FGF2	DSS	0.890897	2247
PCPG	FGF2	DFI	0.105803	2247
PCPG	ICAM1	OS	0.753109	3383
PCPG	ICAM1	PFS	0.153667	3383
PCPG	ICAM1	DSS	0.387553	3383
PCPG	ICAM1	DFI	0.338786	3383
PCPG	ICAM3	OS	0.710194	3385
PCPG	ICAM3	PFS	0.203841	3385
PCPG	ICAM3	DSS	0.352218	3385
PCPG	ICAM3	DFI	0.381226	3385
PCPG	ITGA2	OS	0.350506	3673
PCPG	ITGA2	PFS	0.524231	3673
PCPG	ITGA2	DSS	0.851947	3673
PCPG	ITGA2	DFI	0.360678	3673
PCPG	LCP1	OS	0.741346	3936
PCPG	LCP1	PFS	0.142287	3936
PCPG	LCP1	DSS	0.830784	3936
PCPG	LCP1	DFI	0.756255	3936
PCPG	MMP1	OS	0.941626	4312
PCPG	MMP1	PFS	0.263206	4312
PCPG	MMP1	DSS	0.59309	4312
PCPG	MMP1	DFI	0.211134	4312
PCPG	MMP10	OS	0.941626	4319
PCPG	MMP10	PFS	0.263206	4319
PCPG	MMP10	DSS	0.59309	4319
PCPG	MMP10	DFI	0.211134	4319
PCPG	MMP12	OS	0.941626	4321
PCPG	MMP12	PFS	0.263206	4321
PCPG	MMP12	DSS	0.59309	4321
PCPG	MMP12	DFI	0.211134	4321
PCPG	MMP13	OS	0.941626	4322
PCPG	MMP13	PFS	0.263206	4322
PCPG	MMP13	DSS	0.59309	4322
PCPG	MMP13	DFI	0.211134	4322
PCPG	MMP14	OS	0.565441	4323
PCPG	MMP14	PFS	0.142035	4323
PCPG	MMP14	DSS	0.67302	4323
PCPG	MMP14	DFI	0.663215	4323
PCPG	MMP2	OS	0.00909575	4313
PCPG	MMP2	PFS	0.117638	4313
PCPG	MMP2	DSS	7.536e-05	4313
PCPG	MMP2	DFI	0.890048	4313
PCPG	MMP3	OS	0.941626	4314
PCPG	MMP3	PFS	0.263206	4314
PCPG	MMP3	DSS	0.59309	4314
PCPG	MMP3	DFI	0.211134	4314
PCPG	MMP9	OS	0.789558	4318
PCPG	MMP9	PFS	0.778711	4318
PCPG	MMP9	DSS	0.863099	4318
PCPG	MMP9	DFI	0.764841	4318
PCPG	SERPINE1	OS	0.287505	5054
PCPG	SERPINE1	PFS	0.557962	5054
PCPG	SERPINE1	DSS	0.112579	5054
PCPG	SERPINE1	DFI	0.595239	5054
PCPG	SPP1	OS	0.821418	6696
PCPG	SPP1	PFS	0.229439	6696
PCPG	SPP1	DSS	0.890897	6696
PCPG	SPP1	DFI	0.0523631	6696
PCPG	TIMP2	OS	0.0862404	7077
PCPG	TIMP2	PFS	0.26636	7077
PCPG	TIMP2	DSS	0.0225967	7077
PCPG	TIMP2	DFI	0.749676	7077
PCPG	TNF	OS	0.773328	7124
PCPG	TNF	PFS	0.10794	7124
PCPG	TNF	DSS	0.85942	7124
PCPG	TNF	DFI	0.656723	7124
PCPG	TNFRSF11B	OS	0.444904	4982
PCPG	TNFRSF11B	PFS	0.257478	4982
PCPG	TNFRSF11B	DSS	0.278192	4982
PCPG	TNFRSF11B	DFI	0.271223	4982
PRAD	FGF2	OS	0.515966	2247
PRAD	FGF2	PFS	0.213206	2247
PRAD	FGF2	DSS	0.687253	2247
PRAD	FGF2	DFI	0.0303285	2247
PRAD	ICAM1	OS	0.727882	3383
PRAD	ICAM1	PFS	0.00130536	3383
PRAD	ICAM1	DSS	0.826813	3383
PRAD	ICAM1	DFI	0.0023073	3383
PRAD	ICAM3	OS	0.727882	3385
PRAD	ICAM3	PFS	0.00130536	3385
PRAD	ICAM3	DSS	0.826813	3385
PRAD	ICAM3	DFI	0.0023073	3385
PRAD	ITGA2	OS	0.881308	3673
PRAD	ITGA2	PFS	0.0054998	3673
PRAD	ITGA2	DSS	0.939262	3673
PRAD	ITGA2	DFI	0.0873125	3673
PRAD	LCP1	OS	0.804085	3936
PRAD	LCP1	PFS	0.333872	3936
PRAD	LCP1	DSS	0.469474	3936
PRAD	LCP1	DFI	0.0855311	3936
PRAD	MMP1	OS	0.532482	4312
PRAD	MMP1	PFS	0.84748	4312
PRAD	MMP1	DSS	0.710339	4312
PRAD	MMP1	DFI	0.255754	4312
PRAD	MMP10	OS	0.532482	4319
PRAD	MMP10	PFS	0.84748	4319
PRAD	MMP10	DSS	0.710339	4319
PRAD	MMP10	DFI	0.255754	4319
PRAD	MMP12	OS	0.544269	4321
PRAD	MMP12	PFS	0.753218	4321
PRAD	MMP12	DSS	0.721548	4321
PRAD	MMP12	DFI	0.171619	4321
PRAD	MMP13	OS	0.544269	4322
PRAD	MMP13	PFS	0.753218	4322
PRAD	MMP13	DSS	0.721548	4322
PRAD	MMP13	DFI	0.171619	4322
PRAD	MMP14	OS	0.0858395	4323
PRAD	MMP14	PFS	0.00419989	4323
PRAD	MMP14	DSS	0.00455218	4323
PRAD	MMP14	DFI	0.608707	4323
PRAD	MMP2	OS	0.507868	4313
PRAD	MMP2	PFS	0.0431964	4313
PRAD	MMP2	DSS	0.840728	4313
PRAD	MMP2	DFI	0.0238596	4313
PRAD	MMP3	OS	0.544269	4314
PRAD	MMP3	PFS	0.753218	4314
PRAD	MMP3	DSS	0.721548	4314
PRAD	MMP3	DFI	0.171619	4314
PRAD	MMP9	OS	0.90522	4318
PRAD	MMP9	PFS	0.691251	4318
PRAD	MMP9	DSS	0.753368	4318
PRAD	MMP9	DFI	0.437149	4318
PRAD	SERPINE1	OS	0.0451469	5054
PRAD	SERPINE1	PFS	0.582323	5054
PRAD	SERPINE1	DSS	0.0040605	5054
PRAD	SERPINE1	DFI	0.793784	5054
PRAD	SPP1	OS	0.778023	6696
PRAD	SPP1	PFS	0.237255	6696
PRAD	SPP1	DSS	0.745765	6696
PRAD	SPP1	DFI	0.0209089	6696
PRAD	TIMP2	OS	0.185855	7077
PRAD	TIMP2	PFS	0.0594728	7077
PRAD	TIMP2	DSS	0.02624	7077
PRAD	TIMP2	DFI	0.227703	7077
PRAD	TNF	OS	0.30156	7124
PRAD	TNF	PFS	0.629893	7124
PRAD	TNF	DSS	0.10896	7124
PRAD	TNF	DFI	0.519206	7124
PRAD	TNFRSF11B	OS	0.955807	4982
PRAD	TNFRSF11B	PFS	0.0071228	4982
PRAD	TNFRSF11B	DSS	0.530678	4982
PRAD	TNFRSF11B	DFI	0	4982
READ	FGF2	OS	0.741738	2247
READ	FGF2	PFS	0.566793	2247
READ	FGF2	DSS	0.611111	2247
READ	FGF2	DFI	0.187119	2247
READ	ICAM1	OS	0.870881	3383
READ	ICAM1	PFS	0.24156	3383
READ	ICAM1	DSS	0.518557	3383
READ	ICAM1	DFI	0.324235	3383
READ	ICAM3	OS	0.870881	3385
READ	ICAM3	PFS	0.24156	3385
READ	ICAM3	DSS	0.518557	3385
READ	ICAM3	DFI	0.324235	3385
READ	ITGA2	OS	0.967029	3673
READ	ITGA2	PFS	0.154838	3673
READ	ITGA2	DSS	0.94529	3673
READ	ITGA2	DFI	0.290136	3673
READ	LCP1	OS	0.761516	3936
READ	LCP1	PFS	0.0976646	3936
READ	LCP1	DSS	0.678483	3936
READ	LCP1	DFI	0.530692	3936
READ	MMP1	OS	0.158599	4312
READ	MMP1	PFS	0.199232	4312
READ	MMP1	DSS	0.233209	4312
READ	MMP1	DFI	0.47207	4312
READ	MMP10	OS	0.158599	4319
READ	MMP10	PFS	0.199232	4319
READ	MMP10	DSS	0.233209	4319
READ	MMP10	DFI	0.47207	4319
READ	MMP12	OS	0.158599	4321
READ	MMP12	PFS	0.199232	4321
READ	MMP12	DSS	0.233209	4321
READ	MMP12	DFI	0.47207	4321
READ	MMP13	OS	0.158599	4322
READ	MMP13	PFS	0.199232	4322
READ	MMP13	DSS	0.233209	4322
READ	MMP13	DFI	0.47207	4322
READ	MMP14	OS	0.591159	4323
READ	MMP14	PFS	0.0864239	4323
READ	MMP14	DSS	0.607322	4323
READ	MMP14	DFI	0.292222	4323
READ	MMP2	OS	0.658536	4313
READ	MMP2	PFS	0.559825	4313
READ	MMP2	DSS	0.904109	4313
READ	MMP2	DFI	0.716907	4313
READ	MMP3	OS	0.158599	4314
READ	MMP3	PFS	0.199232	4314
READ	MMP3	DSS	0.233209	4314
READ	MMP3	DFI	0.47207	4314
READ	MMP9	OS	0.777481	4318
READ	MMP9	PFS	0.42732	4318
READ	MMP9	DSS	0.589034	4318
READ	MMP9	DFI	0.577958	4318
READ	SERPINE1	OS	0.663971	5054
READ	SERPINE1	PFS	0.329157	5054
READ	SERPINE1	DSS	0.880583	5054
READ	SERPINE1	DFI	0.855227	5054
READ	SPP1	OS	0.270511	6696
READ	SPP1	PFS	0.859468	6696
READ	SPP1	DSS	0.305722	6696
READ	SPP1	DFI	0.0673515	6696
READ	TIMP2	OS	0.689257	7077
READ	TIMP2	PFS	0.8332	7077
READ	TIMP2	DSS	0.693254	7077
READ	TIMP2	DFI	0.873932	7077
READ	TNF	OS	0.00920572	7124
READ	TNF	PFS	0.424073	7124
READ	TNF	DSS	0.181357	7124
READ	TNF	DFI	0.483233	7124
READ	TNFRSF11B	OS	0.154236	4982
READ	TNFRSF11B	PFS	0.154951	4982
READ	TNFRSF11B	DSS	0.232635	4982
READ	TNFRSF11B	DFI	0.738633	4982
SARC	FGF2	OS	0.195005	2247
SARC	FGF2	PFS	0.203616	2247
SARC	FGF2	DSS	0.324178	2247
SARC	FGF2	DFI	0.286836	2247
SARC	ICAM1	OS	0.71163	3383
SARC	ICAM1	PFS	0.568039	3383
SARC	ICAM1	DSS	0.779019	3383
SARC	ICAM1	DFI	0.948892	3383
SARC	ICAM3	OS	0.71163	3385
SARC	ICAM3	PFS	0.568039	3385
SARC	ICAM3	DSS	0.779019	3385
SARC	ICAM3	DFI	0.948892	3385
SARC	ITGA2	OS	0.00102002	3673
SARC	ITGA2	PFS	0.00415624	3673
SARC	ITGA2	DSS	0.0281706	3673
SARC	ITGA2	DFI	0.082987	3673
SARC	LCP1	OS	0.821239	3936
SARC	LCP1	PFS	0.424596	3936
SARC	LCP1	DSS	0.760225	3936
SARC	LCP1	DFI	0.702209	3936
SARC	MMP1	OS	0.260739	4312
SARC	MMP1	PFS	0.405467	4312
SARC	MMP1	DSS	0.497147	4312
SARC	MMP1	DFI	0.133219	4312
SARC	MMP10	OS	0.16563	4319
SARC	MMP10	PFS	0.35471	4319
SARC	MMP10	DSS	0.336431	4319
SARC	MMP10	DFI	0.133219	4319
SARC	MMP12	OS	0.16563	4321
SARC	MMP12	PFS	0.35471	4321
SARC	MMP12	DSS	0.336431	4321
SARC	MMP12	DFI	0.133219	4321
SARC	MMP13	OS	0.0783571	4322
SARC	MMP13	PFS	0.205826	4322
SARC	MMP13	DSS	0.173974	4322
SARC	MMP13	DFI	0.0286549	4322
SARC	MMP14	OS	0.145452	4323
SARC	MMP14	PFS	0.571917	4323
SARC	MMP14	DSS	0.158333	4323
SARC	MMP14	DFI	0.589682	4323
SARC	MMP2	OS	0.104289	4313
SARC	MMP2	PFS	0.0245875	4313
SARC	MMP2	DSS	0.253502	4313
SARC	MMP2	DFI	0.41631	4313
SARC	MMP3	OS	0.16563	4314
SARC	MMP3	PFS	0.35471	4314
SARC	MMP3	DSS	0.336431	4314
SARC	MMP3	DFI	0.133219	4314
SARC	MMP9	OS	0.0183693	4318
SARC	MMP9	PFS	0.00134447	4318
SARC	MMP9	DSS	0.0731183	4318
SARC	MMP9	DFI	0.0163743	4318
SARC	SERPINE1	OS	0.178731	5054
SARC	SERPINE1	PFS	0.0671928	5054
SARC	SERPINE1	DSS	0.0453879	5054
SARC	SERPINE1	DFI	0.0150773	5054
SARC	SPP1	OS	0.323893	6696
SARC	SPP1	PFS	0.206644	6696
SARC	SPP1	DSS	0.253447	6696
SARC	SPP1	DFI	0.0834201	6696
SARC	TIMP2	OS	0.0719876	7077
SARC	TIMP2	PFS	0.0521348	7077
SARC	TIMP2	DSS	0.116791	7077
SARC	TIMP2	DFI	0.499106	7077
SARC	TNF	OS	0.0335943	7124
SARC	TNF	PFS	0.00388109	7124
SARC	TNF	DSS	0.0975443	7124
SARC	TNF	DFI	0.079186	7124
SARC	TNFRSF11B	OS	0.00560335	4982
SARC	TNFRSF11B	PFS	0.0086217	4982
SARC	TNFRSF11B	DSS	0.00978038	4982
SARC	TNFRSF11B	DFI	0.164326	4982
SKCM	FGF2	OS	0.989506	2247
SKCM	FGF2	PFS	0.769357	2247
SKCM	FGF2	DSS	0.913797	2247
SKCM	ICAM1	OS	0.845586	3383
SKCM	ICAM1	PFS	0.670128	3383
SKCM	ICAM1	DSS	0.836355	3383
SKCM	ICAM3	OS	0.84098	3385
SKCM	ICAM3	PFS	0.693758	3385
SKCM	ICAM3	DSS	0.844648	3385
SKCM	ITGA2	OS	0.667259	3673
SKCM	ITGA2	PFS	0.537848	3673
SKCM	ITGA2	DSS	0.65185	3673
SKCM	LCP1	OS	0.130252	3936
SKCM	LCP1	PFS	0.287928	3936
SKCM	LCP1	DSS	0.0644586	3936
SKCM	MMP1	OS	0.942464	4312
SKCM	MMP1	PFS	0.737157	4312
SKCM	MMP1	DSS	0.636006	4312
SKCM	MMP10	OS	0.942464	4319
SKCM	MMP10	PFS	0.737157	4319
SKCM	MMP10	DSS	0.636006	4319
SKCM	MMP12	OS	0.755584	4321
SKCM	MMP12	PFS	0.393571	4321
SKCM	MMP12	DSS	0.387309	4321
SKCM	MMP13	OS	0.759867	4322
SKCM	MMP13	PFS	0.392272	4322
SKCM	MMP13	DSS	0.409272	4322
SKCM	MMP14	OS	0.556721	4323
SKCM	MMP14	PFS	0.571613	4323
SKCM	MMP14	DSS	0.715365	4323
SKCM	MMP2	OS	0.906854	4313
SKCM	MMP2	PFS	0.682147	4313
SKCM	MMP2	DSS	0.873623	4313
SKCM	MMP3	OS	0.755584	4314
SKCM	MMP3	PFS	0.393571	4314
SKCM	MMP3	DSS	0.387309	4314
SKCM	MMP9	OS	0.667345	4318
SKCM	MMP9	PFS	0.266989	4318
SKCM	MMP9	DSS	0.93635	4318
SKCM	SERPINE1	OS	0.440245	5054
SKCM	SERPINE1	PFS	0.292305	5054
SKCM	SERPINE1	DSS	0.610937	5054
SKCM	SPP1	OS	0.918526	6696
SKCM	SPP1	PFS	0.818005	6696
SKCM	SPP1	DSS	0.924922	6696
SKCM	TIMP2	OS	0.503647	7077
SKCM	TIMP2	PFS	0.426223	7077
SKCM	TIMP2	DSS	0.784837	7077
SKCM	TNF	OS	0.0339608	7124
SKCM	TNF	PFS	0.0911934	7124
SKCM	TNF	DSS	0.0212086	7124
SKCM	TNFRSF11B	OS	0.437594	4982
SKCM	TNFRSF11B	PFS	0.470317	4982
SKCM	TNFRSF11B	DSS	0.427124	4982
STAD	FGF2	OS	0.137488	2247
STAD	FGF2	PFS	0.201964	2247
STAD	FGF2	DSS	0.266676	2247
STAD	FGF2	DFI	0.0330154	2247
STAD	ICAM1	OS	0.19591	3383
STAD	ICAM1	PFS	0.657272	3383
STAD	ICAM1	DSS	0.428479	3383
STAD	ICAM1	DFI	0.444373	3383
STAD	ICAM3	OS	0.356825	3385
STAD	ICAM3	PFS	0.74987	3385
STAD	ICAM3	DSS	0.556223	3385
STAD	ICAM3	DFI	0.444373	3385
STAD	ITGA2	OS	0.645649	3673
STAD	ITGA2	PFS	0.443023	3673
STAD	ITGA2	DSS	0.280567	3673
STAD	ITGA2	DFI	0.874937	3673
STAD	LCP1	OS	0.119076	3936
STAD	LCP1	PFS	0.848188	3936
STAD	LCP1	DSS	0.812245	3936
STAD	LCP1	DFI	0.526045	3936
STAD	MMP1	OS	0.28758	4312
STAD	MMP1	PFS	0.0436484	4312
STAD	MMP1	DSS	0.09127	4312
STAD	MMP1	DFI	0.202981	4312
STAD	MMP10	OS	0.28758	4319
STAD	MMP10	PFS	0.0436484	4319
STAD	MMP10	DSS	0.09127	4319
STAD	MMP10	DFI	0.202981	4319
STAD	MMP12	OS	0.309182	4321
STAD	MMP12	PFS	0.050285	4321
STAD	MMP12	DSS	0.0901223	4321
STAD	MMP12	DFI	0.211241	4321
STAD	MMP13	OS	0.301242	4322
STAD	MMP13	PFS	0.0417748	4322
STAD	MMP13	DSS	0.0912758	4322
STAD	MMP13	DFI	0.170464	4322
STAD	MMP14	OS	0.282634	4323
STAD	MMP14	PFS	0.670202	4323
STAD	MMP14	DSS	0.0312417	4323
STAD	MMP14	DFI	0.83584	4323
STAD	MMP2	OS	0.0849372	4313
STAD	MMP2	PFS	0.0342308	4313
STAD	MMP2	DSS	0.0669786	4313
STAD	MMP2	DFI	0.196644	4313
STAD	MMP3	OS	0.309182	4314
STAD	MMP3	PFS	0.050285	4314
STAD	MMP3	DSS	0.0901223	4314
STAD	MMP3	DFI	0.211241	4314
STAD	MMP9	OS	0.813487	4318
STAD	MMP9	PFS	0.947318	4318
STAD	MMP9	DSS	0.661347	4318
STAD	MMP9	DFI	0.553497	4318
STAD	SERPINE1	OS	0.246658	5054
STAD	SERPINE1	PFS	0.496986	5054
STAD	SERPINE1	DSS	0.69711	5054
STAD	SERPINE1	DFI	0.23001	5054
STAD	SPP1	OS	0.762907	6696
STAD	SPP1	PFS	0.855655	6696
STAD	SPP1	DSS	0.465681	6696
STAD	SPP1	DFI	0.517243	6696
STAD	TIMP2	OS	0.865909	7077
STAD	TIMP2	PFS	0.616683	7077
STAD	TIMP2	DSS	0.465871	7077
STAD	TIMP2	DFI	0.866784	7077
STAD	TNF	OS	0.157908	7124
STAD	TNF	PFS	0.840062	7124
STAD	TNF	DSS	0.260126	7124
STAD	TNF	DFI	0.644264	7124
STAD	TNFRSF11B	OS	0.00177704	4982
STAD	TNFRSF11B	PFS	0.0233698	4982
STAD	TNFRSF11B	DSS	0.0746156	4982
STAD	TNFRSF11B	DFI	0.424441	4982
TGCT	FGF2	OS	0.304846	2247
TGCT	FGF2	PFS	0.884532	2247
TGCT	FGF2	DSS	0.301969	2247
TGCT	FGF2	DFI	0.98656	2247
TGCT	ICAM1	OS	0.557773	3383
TGCT	ICAM1	PFS	0.628137	3383
TGCT	ICAM1	DSS	0.588429	3383
TGCT	ICAM1	DFI	0.656903	3383
TGCT	ICAM3	OS	0.557773	3385
TGCT	ICAM3	PFS	0.628137	3385
TGCT	ICAM3	DSS	0.588429	3385
TGCT	ICAM3	DFI	0.656903	3385
TGCT	ITGA2	OS	0.95331	3673
TGCT	ITGA2	PFS	0.109402	3673
TGCT	ITGA2	DSS	0.95426	3673
TGCT	ITGA2	DFI	0.542252	3673
TGCT	LCP1	OS	0.347344	3936
TGCT	LCP1	PFS	0.583735	3936
TGCT	LCP1	DSS	0.344606	3936
TGCT	LCP1	DFI	0.460769	3936
TGCT	MMP1	OS	0.584614	4312
TGCT	MMP1	PFS	0.00483891	4312
TGCT	MMP1	DSS	0.687507	4312
TGCT	MMP1	DFI	0.00286432	4312
TGCT	MMP10	OS	0.584614	4319
TGCT	MMP10	PFS	0.00483891	4319
TGCT	MMP10	DSS	0.687507	4319
TGCT	MMP10	DFI	0.00286432	4319
TGCT	MMP12	OS	0.584614	4321
TGCT	MMP12	PFS	0.00483891	4321
TGCT	MMP12	DSS	0.687507	4321
TGCT	MMP12	DFI	0.00286432	4321
TGCT	MMP13	OS	0.584614	4322
TGCT	MMP13	PFS	0.00483891	4322
TGCT	MMP13	DSS	0.687507	4322
TGCT	MMP13	DFI	0.00286432	4322
TGCT	MMP14	OS	0.321623	4323
TGCT	MMP14	PFS	0.565158	4323
TGCT	MMP14	DSS	0.490257	4323
TGCT	MMP14	DFI	0.978432	4323
TGCT	MMP2	OS	0.316109	4313
TGCT	MMP2	PFS	0.167007	4313
TGCT	MMP2	DSS	0.323483	4313
TGCT	MMP2	DFI	0.501102	4313
TGCT	MMP3	OS	0.584614	4314
TGCT	MMP3	PFS	0.00483891	4314
TGCT	MMP3	DSS	0.687507	4314
TGCT	MMP3	DFI	0.00286432	4314
TGCT	MMP9	OS	0.652014	4318
TGCT	MMP9	PFS	0.712297	4318
TGCT	MMP9	DSS	0.855401	4318
TGCT	MMP9	DFI	0.843754	4318
TGCT	SERPINE1	OS	0.94936	5054
TGCT	SERPINE1	PFS	0.947622	5054
TGCT	SERPINE1	DSS	0.833786	5054
TGCT	SERPINE1	DFI	0.560058	5054
TGCT	SPP1	OS	0.312747	6696
TGCT	SPP1	PFS	0.774749	6696
TGCT	SPP1	DSS	0.309899	6696
TGCT	SPP1	DFI	0.951146	6696
TGCT	TIMP2	OS	0.369464	7077
TGCT	TIMP2	PFS	0.86318	7077
TGCT	TIMP2	DSS	0.556744	7077
TGCT	TIMP2	DFI	0.917512	7077
TGCT	TNF	OS	0.548647	7124
TGCT	TNF	PFS	0.821141	7124
TGCT	TNF	DSS	0.608348	7124
TGCT	TNF	DFI	0.790803	7124
TGCT	TNFRSF11B	OS	0.502489	4982
TGCT	TNFRSF11B	PFS	0.0514775	4982
TGCT	TNFRSF11B	DSS	0.589964	4982
TGCT	TNFRSF11B	DFI	0.0166649	4982
THCA	FGF2	OS	0.0311329	2247
THCA	FGF2	PFS	0.64675	2247
THCA	FGF2	DSS	0.000188415	2247
THCA	FGF2	DFI	0.358989	2247
THCA	ICAM1	OS	0.298025	3383
THCA	ICAM1	PFS	0.81242	3383
THCA	ICAM1	DSS	0.0159725	3383
THCA	ICAM1	DFI	0.330902	3383
THCA	ICAM3	OS	0.298025	3385
THCA	ICAM3	PFS	0.81242	3385
THCA	ICAM3	DSS	0.0159725	3385
THCA	ICAM3	DFI	0.330902	3385
THCA	ITGA2	OS	0.0154154	3673
THCA	ITGA2	PFS	0.0755779	3673
THCA	ITGA2	DSS	3.4506e-05	3673
THCA	ITGA2	DFI	0.147079	3673
THCA	LCP1	OS	0.110518	3936
THCA	LCP1	PFS	0.733815	3936
THCA	LCP1	DSS	0.000533464	3936
THCA	LCP1	DFI	0.242636	3936
THCA	MMP1	OS	0.0723961	4312
THCA	MMP1	PFS	0.000124862	4312
THCA	MMP1	DSS	0.0075038	4312
THCA	MMP1	DFI	0.00839908	4312
THCA	MMP10	OS	0.0723961	4319
THCA	MMP10	PFS	0.000124862	4319
THCA	MMP10	DSS	0.0075038	4319
THCA	MMP10	DFI	0.00839908	4319
THCA	MMP12	OS	0.0723961	4321
THCA	MMP12	PFS	0.000124862	4321
THCA	MMP12	DSS	0.0075038	4321
THCA	MMP12	DFI	0.00839908	4321
THCA	MMP13	OS	0.0723961	4322
THCA	MMP13	PFS	0.000124862	4322
THCA	MMP13	DSS	0.0075038	4322
THCA	MMP13	DFI	0.00839908	4322
THCA	MMP14	OS	0.567558	4323
THCA	MMP14	PFS	0.769734	4323
THCA	MMP14	DSS	0.707511	4323
THCA	MMP14	DFI	0.636907	4323
THCA	MMP2	OS	0.38833	4313
THCA	MMP2	PFS	0.590535	4313
THCA	MMP2	DSS	0.0490968	4313
THCA	MMP2	DFI	0.431204	4313
THCA	MMP3	OS	0.0723961	4314
THCA	MMP3	PFS	0.000124862	4314
THCA	MMP3	DSS	0.0075038	4314
THCA	MMP3	DFI	0.00839908	4314
THCA	MMP9	OS	0.253874	4318
THCA	MMP9	PFS	0.482349	4318
THCA	MMP9	DSS	0.0215107	4318
THCA	MMP9	DFI	0.53518	4318
THCA	SERPINE1	OS	0.460121	5054
THCA	SERPINE1	PFS	0.66538	5054
THCA	SERPINE1	DSS	0.111921	5054
THCA	SERPINE1	DFI	0.316199	5054
THCA	SPP1	OS	0.0311329	6696
THCA	SPP1	PFS	0.64675	6696
THCA	SPP1	DSS	0.000188415	6696
THCA	SPP1	DFI	0.358989	6696
THCA	TIMP2	OS	0.373027	7077
THCA	TIMP2	PFS	0.38185	7077
THCA	TIMP2	DSS	0.550367	7077
THCA	TIMP2	DFI	0.0824253	7077
THCA	TNF	OS	0.000532148	7124
THCA	TNF	PFS	0.242975	7124
THCA	TNF	DSS	4.46569e-07	7124
THCA	TNF	DFI	0.0354809	7124
THCA	TNFRSF11B	OS	0.314684	4982
THCA	TNFRSF11B	PFS	0.277717	4982
THCA	TNFRSF11B	DSS	0.013325	4982
THCA	TNFRSF11B	DFI	0.423732	4982
THYM	FGF2	OS	0.721467	2247
THYM	FGF2	PFS	0.600482	2247
THYM	FGF2	DSS	0.854583	2247
THYM	ICAM1	OS	0.860423	3383
THYM	ICAM1	PFS	0.616225	3383
THYM	ICAM1	DSS	0.93253	3383
[truncated: 246 more rows]
