# Supplementary material for: Pan-cancer analyses of senescence-related genes in extracellular matrix characterization in cancer
Source: Discov Oncol. 2023 Nov 20;14:208. doi: 10.1007/s12672-023-00828-7 (PMC10660488; doi:10.1007/s12672-023-00828-7)
Supplement: Supplementary file 21 — Supplementary file21 (XLSX 23 KB) [file 12672_2023_828_MOESM21_ESM.xlsx]

## Sheet: SheetName
Table S16 The detailed information about the methylation difference between tumor and normal samples in pan-cancer
cancertype	symbol	gene_tag	fc	trend	pval	fdr	entrez
BLCA	FGF2	cg03941587_FGF2	0.161902	Up	1.80372e-06	3.41133e-06	2247
BLCA	ITGA2	cg02741854_ITGA2	-0.0109021	Down	0.000520494	0.000708074	3673
BLCA	LCP1	cg17771150_LCP1	-0.3208	Down	1.95552e-10	6.40636e-10	3936
BLCA	MMP1	cg16575408_MMP1	-0.0644071	Down	1.22445e-22	2.27934e-21	4312
BLCA	MMP10	cg02061229_MMP10	-0.250611	Down	8.74022e-13	4.08823e-12	4319
BLCA	MMP13	cg10085326_MMP13	-0.300844	Down	2.62811e-30	1.0982e-28	4322
BLCA	MMP14	cg18207699_MMP14	-0.0156983	Down	0.0307142	0.0310782	4323
BLCA	MMP2	cg04049508_MMP2	-0.234431	Down	8.82006e-08	2.01431e-07	4313
BLCA	PECAM1	cg00427260_PECAM1	-0.0427812	Down	0.000317435	0.000444952	5175
BLCA	SERPINE1	cg01975495_SERPINE1	0.0642539	Up	3.4527e-05	5.4777e-05	5054
BLCA	SPP1	cg00088885_SPP1	-0.299057	Down	3.82177e-16	2.7867e-15	6696
BLCA	TIMP2	cg05306745_TIMP2	0.348346	Up	2.89125e-10	9.2364e-10	7077
BLCA	TNFRSF11B	cg26019549_TNFRSF11B	-0.0397329	Down	8.07553e-06	1.391e-05	4982
BRCA	FGF2	cg24683623_FGF2	0.185992	Up	1.33053e-37	5.4789e-37	2247
BRCA	ICAM1	cg26549174_ICAM1	0.061732	Up	1.86404e-09	3.08758e-09	3383
BRCA	ICAM3	cg14145194_ICAM3	-0.0840478	Down	4.42664e-24	1.23413e-23	3385
BRCA	ITGA2	cg08874888_ITGA2	-0.113264	Down	5.4386e-62	4.60215e-61	3673
BRCA	LCP1	cg04341806_LCP1	-0.0981006	Down	4.37597e-26	1.30045e-25	3936
BRCA	MMP1	cg16575408_MMP1	-0.0235811	Down	2.45796e-08	3.86836e-08	4312
BRCA	MMP10	cg02061229_MMP10	-0.168456	Down	3.62093e-37	1.47376e-36	4319
BRCA	MMP12	cg09002726_MMP12	-0.0890578	Down	1.54795e-41	7.10926e-41	4321
BRCA	MMP13	cg22658979_MMP13	-0.125545	Down	3.45017e-65	3.23749e-64	4322
BRCA	MMP14	cg18207699_MMP14	-0.0403811	Down	9.72112e-16	2.05651e-15	4323
BRCA	MMP2	cg05782444_MMP2	0.158839	Up	4.97584e-28	1.56674e-27	4313
BRCA	MMP3	cg17145397_MMP3	-0.0569233	Down	3.50791e-19	8.374e-19	4314
BRCA	MMP9	cg02310296_MMP9	0.0315665	Up	0.00442778	0.00493537	4318
BRCA	PECAM1	cg00427260_PECAM1	-0.00937707	Down	0.000350126	0.000428164	5175
BRCA	SERPINE1	cg16617872_SERPINE1	-0.132357	Down	2.94281e-48	1.64961e-47	5054
BRCA	SPP1	cg20261167_SPP1	0.0683267	Up	3.11178e-07	4.62831e-07	6696
BRCA	TIMP2	cg19295840_TIMP2	0.143173	Up	1.46912e-22	3.90663e-22	7077
BRCA	TNF	cg01360627_TNF	-0.0930879	Down	3.39784e-33	1.247e-32	7124
BRCA	TNFRSF11B	cg12545993_TNFRSF11B	0.0975677	Up	8.63211e-37	3.47312e-36	4982
COAD	ICAM3	cg14145194_ICAM3	0.0332232	Up	0.0191289	0.019895	3385
COAD	ITGA2	cg17480554_ITGA2	0.0182012	Up	0.0197644	0.020503	3673
COAD	LCP1	cg04341806_LCP1	0.0463883	Up	5.72581e-06	9.11182e-06	3936
COAD	MMP1	cg14543953_MMP1	-0.415855	Down	1.93922e-26	1.07448e-25	4312
COAD	MMP10	cg02061229_MMP10	-0.263645	Down	1.58295e-29	1.03841e-28	4319
COAD	MMP12	cg09002726_MMP12	-0.259291	Down	1.6551e-50	3.06793e-49	4321
COAD	MMP13	cg03331229_MMP13	-0.0752268	Down	6.85796e-12	1.71411e-11	4322
COAD	MMP14	cg26433554_MMP14	0.0222528	Up	0.00505965	0.00576041	4323
COAD	MMP2	cg00355286_MMP2	-0.314439	Down	1.35639e-32	1.05279e-31	4313
COAD	MMP3	cg16466334_MMP3	-0.0425134	Down	5.9859e-05	8.6389e-05	4314
COAD	MMP9	cg26132320_MMP9	0.204268	Up	1.16768e-13	3.24371e-13	4318
COAD	SERPINE1	cg01975495_SERPINE1	0.0537146	Up	5.37716e-07	9.37364e-07	5054
COAD	SPP1	cg20261167_SPP1	-0.116675	Down	4.56636e-10	1.00572e-09	6696
COAD	TIMP2	cg13694343_TIMP2	0.0290374	Up	0.0210942	0.0217882	7077
COAD	TNF	cg09637172_TNF	0.0506109	Up	2.028e-05	3.0715e-05	7124
COAD	TNFRSF11B	cg17171407_TNFRSF11B	-0.0500905	Down	0.00475485	0.00543536	4982
ESCA	ICAM1	cg26549174_ICAM1	-0.109233	Down	0.00268532	0.00415455	3383
ESCA	ITGA2	cg17480554_ITGA2	-0.151398	Down	0.00462151	0.00636102	3673
ESCA	MMP10	cg02061229_MMP10	-0.145243	Down	0.00056402	0.00124088	4319
ESCA	MMP12	cg20487452_MMP12	-0.176845	Down	0.00656924	0.00833941	4321
ESCA	MMP13	cg10085326_MMP13	-0.250562	Down	3.0693e-05	0.00013446	4322
ESCA	MMP2	cg08318842_MMP2	0.120967	Up	0.000589154	0.00128306	4313
ESCA	MMP3	cg18113270_MMP3	-0.0349351	Down	1.15623e-07	1.48826e-06	4314
ESCA	MMP9	cg23303369_MMP9	0.152906	Up	0.0028349	0.00433698	4318
ESCA	SERPINE1	cg02273392_SERPINE1	0.0429825	Up	2.44677e-08	4.05992e-07	5054
ESCA	SPP1	cg00088885_SPP1	-0.161204	Down	0.000127207	0.000400614	6696
ESCA	TNFRSF11B	cg04857420_TNFRSF11B	0.155086	Up	3.57406e-06	2.4396e-05	4982
HNSC	FGF2	cg17214107_FGF2	0.143421	Up	7.26414e-13	1.92712e-12	2247
HNSC	ICAM1	cg26549174_ICAM1	-0.216168	Down	5.62867e-28	3.22814e-27	3383
HNSC	ICAM3	cg14145194_ICAM3	-0.106048	Down	9.76832e-09	1.96282e-08	3385
HNSC	MMP1	cg16575408_MMP1	-0.0254966	Down	1.73316e-12	4.49232e-12	4312
HNSC	MMP10	cg02061229_MMP10	-0.087341	Down	4.61996e-08	8.84788e-08	4319
HNSC	MMP12	cg09002726_MMP12	-0.114422	Down	6.8414e-18	2.4059e-17	4321
HNSC	MMP13	cg19710916_MMP13	-0.209308	Down	1.09844e-48	1.68821e-47	4322
HNSC	MMP2	cg05782444_MMP2	0.173063	Up	2.41145e-14	6.99299e-14	4313
HNSC	MMP3	cg16466334_MMP3	-0.100851	Down	3.7337e-05	5.5061e-05	4314
HNSC	MMP9	cg00732815_MMP9	-0.0669232	Down	3.31881e-11	8.00698e-11	4318
HNSC	PECAM1	cg00427260_PECAM1	-0.0459169	Down	1.76154e-09	3.72705e-09	5175
HNSC	SERPINE1	cg02704552_SERPINE1	0.0775258	Up	9.98835e-11	2.32225e-10	5054
HNSC	SPP1	cg00088885_SPP1	-0.27264	Down	1.72058e-36	1.48051e-35	6696
HNSC	TIMP2	cg00863893_TIMP2	-0.0465964	Down	0.0106337	0.0116093	7077
HNSC	TNF	cg17741993_TNF	-0.098517	Down	2.06401e-06	3.45947e-06	7124
HNSC	TNFRSF11B	cg19620294_TNFRSF11B	0.26247	Up	2.4328e-43	2.83989e-42	4982
KIRC	ICAM1	cg26549174_ICAM1	-0.250559	Down	5.76649e-133	1.12462e-130	3383
KIRC	ICAM3	cg05323251_ICAM3	-0.142811	Down	1.9096e-52	1.50413e-51	3385
KIRC	ITGA2	cg05928650_ITGA2	0.00639081	Up	9.94474e-08	1.38852e-07	3673
KIRC	LCP1	cg17771150_LCP1	-0.161467	Down	8.37645e-56	7.56311e-55	3936
KIRC	MMP1	cg13759446_MMP1	-0.0364854	Down	1.26338e-12	2.20677e-12	4312
KIRC	MMP12	cg23979520_MMP12	-0.0967908	Down	1.11837e-34	4.49777e-34	4321
KIRC	MMP14	cg24698488_MMP14	-0.056065	Down	1.46278e-28	4.76528e-28	4323
KIRC	MMP2	cg00087906_MMP2	0.0282746	Up	8.66052e-11	1.39589e-10	4313
KIRC	MMP3	cg16466334_MMP3	-0.0848315	Down	8.21962e-34	3.20097e-33	4314
KIRC	MMP9	cg04656101_MMP9	-0.0730191	Down	4.11347e-18	9.1357e-18	4318
KIRC	PECAM1	cg00879592_PECAM1	-0.0634768	Down	4.08138e-33	1.54488e-32	5175
KIRC	SERPINE1	cg12584355_SERPINE1	-0.0901379	Down	6.69305e-28	2.12732e-27	5054
KIRC	SPP1	cg15460348_SPP1	-0.0479286	Down	5.6486e-07	7.61774e-07	6696
KIRC	TIMP2	cg00863893_TIMP2	-0.0406993	Down	4.76372e-06	6.13048e-06	7077
KIRC	TNF	cg09637172_TNF	-0.0483216	Down	4.57394e-19	1.05459e-18	7124
KIRP	FGF2	cg12632152_FGF2	0.0125005	Up	0.0308963	0.0311589	2247
KIRP	ICAM1	cg26549174_ICAM1	-0.127382	Down	2.98832e-18	1.2225e-17	3383
KIRP	ICAM3	cg05323251_ICAM3	-0.0972268	Down	7.08771e-09	1.45048e-08	3385
KIRP	ITGA2	cg20674638_ITGA2	-0.0483511	Down	2.7569e-22	1.49885e-21	3673
KIRP	LCP1	cg17771150_LCP1	-0.140156	Down	1.68942e-14	5.34311e-14	3936
KIRP	MMP1	cg14543953_MMP1	-0.078371	Down	1.07819e-21	5.6191e-21	4312
KIRP	MMP10	cg00347729_MMP10	0.0892045	Up	2.45296e-09	5.2268e-09	4319
KIRP	MMP2	cg09350341_MMP2	0.0318991	Up	0.000249703	0.000331403	4313
KIRP	MMP3	cg09615874_MMP3	0.138185	Up	1.25215e-25	8.56372e-25	4314
KIRP	SERPINE1	cg17968347_SERPINE1	0.159433	Up	4.76591e-37	7.527e-36	5054
KIRP	SPP1	cg15460348_SPP1	-0.147537	Down	6.0698e-21	3.01218e-20	6696
KIRP	TNF	cg21467614_TNF	-0.0822927	Down	7.4924e-06	1.1608e-05	7124
KIRP	TNFRSF11B	cg17171407_TNFRSF11B	-0.162511	Down	2.67342e-16	9.53449e-16	4982
LIHC	FGF2	cg15128226_FGF2	0.0538927	Up	0.000322212	0.000394223	2247
LIHC	ICAM3	cg13981319_ICAM3	0.0900486	Up	7.8208e-05	0.000100399	3385
LIHC	ITGA2	cg04996689_ITGA2	0.0499578	Up	9.88047e-11	1.88532e-10	3673
LIHC	LCP1	cg17771150_LCP1	-0.0821965	Down	2.29835e-08	3.77689e-08	3936
LIHC	MMP1	cg25320665_MMP1	-0.166682	Down	2.90498e-24	1.15563e-23	4312
LIHC	MMP10	cg00347729_MMP10	-0.0618275	Down	6.58852e-06	9.12503e-06	4319
LIHC	MMP12	cg20487452_MMP12	-0.296108	Down	1.94738e-61	5.87085e-60	4321
LIHC	MMP13	cg22658979_MMP13	-0.109122	Down	2.2336e-27	1.0367e-26	4322
LIHC	MMP14	cg10418289_MMP14	0.0332617	Up	7.9204e-05	0.000101598	4323
LIHC	MMP2	cg26795346_MMP2	-0.169383	Down	8.17206e-38	6.46844e-37	4313
LIHC	MMP3	cg18113270_MMP3	-0.214714	Down	1.42563e-43	1.50305e-42	4314
LIHC	MMP9	cg15876464_MMP9	0.0459408	Up	2.73109e-09	4.75561e-09	4318
LIHC	PECAM1	cg00427260_PECAM1	-0.0857552	Down	1.93422e-18	5.67556e-18	5175
LIHC	SERPINE1	cg02273392_SERPINE1	0.0681046	Up	2.95516e-14	6.91563e-14	5054
LIHC	SPP1	cg15460348_SPP1	-0.200186	Down	2.19712e-19	6.75132e-19	6696
LIHC	TIMP2	cg05306745_TIMP2	0.287306	Up	1.75647e-20	5.73682e-20	7077
LIHC	TNF	cg21370522_TNF	-0.05218	Down	0.00199757	0.00228723	7124
LUAD	FGF2	cg24683623_FGF2	0.045783	Up	1.27238e-06	1.98751e-06	2247
LUAD	ICAM1	cg02776148_ICAM1	-0.0450913	Down	1.7547e-05	2.4989e-05	3383
LUAD	ICAM3	cg14145194_ICAM3	-0.0653065	Down	1.62837e-06	2.52103e-06	3385
LUAD	LCP1	cg04341806_LCP1	-0.0625716	Down	4.16504e-10	8.34671e-10	3936
LUAD	MMP1	cg16575408_MMP1	-0.0734903	Down	1.3648e-24	7.86378e-24	4312
LUAD	MMP10	cg02061229_MMP10	-0.0432208	Down	1.9373e-05	2.7466e-05	4319
LUAD	MMP12	cg20487452_MMP12	-0.0701289	Down	1.91728e-08	3.40548e-08	4321
LUAD	MMP13	cg10085326_MMP13	-0.22468	Down	1.87592e-21	8.62965e-21	4322
LUAD	MMP14	cg10418289_MMP14	0.0287894	Up	0.000369609	0.000466483	4323
LUAD	MMP2	cg04049508_MMP2	-0.0256888	Down	0.0217531	0.0225155	4313
LUAD	MMP3	cg16466334_MMP3	-0.0613642	Down	5.40176e-17	1.81941e-16	4314
LUAD	SERPINE1	cg17968347_SERPINE1	-0.0270104	Down	0.00315143	0.0036126	5054
LUAD	SPP1	cg20261167_SPP1	0.0473973	Up	7.6007e-05	0.000102569	6696
LUAD	TIMP2	cg00863893_TIMP2	0.172409	Up	2.11789e-20	8.98462e-20	7077
LUAD	TNF	cg02137984_TNF	-0.0432107	Down	5.91623e-07	9.45216e-07	7124
LUAD	TNFRSF11B	cg17171407_TNFRSF11B	0.04794	Up	1.1708e-05	1.6888e-05	4982
LUSC	FGF2	cg14887335_FGF2	-0.0202784	Down	1.97385e-07	2.63936e-07	2247
LUSC	ICAM1	cg26549174_ICAM1	0.0973453	Up	2.89484e-18	6.72228e-18	3383
LUSC	ICAM3	cg14145194_ICAM3	-0.0666047	Down	9.86078e-08	1.34293e-07	3385
LUSC	LCP1	cg04341806_LCP1	-0.0813915	Down	3.12561e-13	5.58943e-13	3936
LUSC	MMP1	cg16575408_MMP1	-0.0190963	Down	4.35372e-11	7.00131e-11	4312
LUSC	MMP10	cg02061229_MMP10	-0.141068	Down	6.3392e-24	1.9555e-23	4319
LUSC	MMP12	cg09002726_MMP12	-0.0579328	Down	1.44367e-08	2.04904e-08	4321
LUSC	MMP13	cg19710916_MMP13	-0.148839	Down	3.16133e-46	2.70452e-45	4322
LUSC	MMP14	cg18207699_MMP14	-0.0678911	Down	2.60042e-26	9.06341e-26	4323
LUSC	MMP2	cg00087906_MMP2	0.0191888	Up	2.32043e-12	3.97381e-12	4313
LUSC	MMP3	cg16466334_MMP3	-0.0758623	Down	7.71775e-25	2.51189e-24	4314
LUSC	MMP9	cg00732815_MMP9	0.0602208	Up	2.27147e-11	3.71232e-11	4318
LUSC	PECAM1	cg00427260_PECAM1	-0.0621033	Down	1.02888e-21	2.85602e-21	5175
LUSC	SERPINE1	cg08053846_SERPINE1	0.0484264	Up	8.4907e-05	9.8817e-05	5054
LUSC	SPP1	cg20261167_SPP1	-0.235643	Down	3.16771e-38	1.90801e-37	6696
LUSC	TIMP2	cg13694343_TIMP2	0.0955812	Up	3.26982e-16	6.81268e-16	7077
LUSC	TNF	cg01360627_TNF	-0.0792327	Down	4.25069e-10	6.50947e-10	7124
LUSC	TNFRSF11B	cg19620294_TNFRSF11B	0.238501	Up	1.1478e-47	1.04905e-46	4982
PAAD	FGF2	cg03737475_FGF2	-0.0409126	Down	0.00694216	0.00879824	2247
PAAD	MMP1	cg13759446_MMP1	-0.0180214	Down	0.00210887	0.003351	4312
PAAD	MMP10	cg02061229_MMP10	-0.107555	Down	0.000142552	0.0003648	4319
PAAD	MMP13	cg10085326_MMP13	-0.201187	Down	5.80791e-11	1.07214e-09	4322
PAAD	MMP2	cg10079740_MMP2	0.249599	Up	2.4504e-15	1.04728e-13	4313
PRAD	FGF2	cg03941587_FGF2	0.233561	Up	1.83139e-13	5.32004e-13	2247
PRAD	ICAM3	cg14145194_ICAM3	-0.0263636	Down	0.000295207	0.000364046	3385
PRAD	ITGA2	cg15676241_ITGA2	-0.0282887	Down	2.21099e-15	7.69418e-15	3673
PRAD	LCP1	cg10983853_LCP1	-0.112565	Down	8.20362e-10	1.67094e-09	3936
PRAD	MMP1	cg16575408_MMP1	-0.00733204	Down	6.15148e-06	8.85846e-06	4312
PRAD	MMP13	cg22658979_MMP13	-0.0210695	Down	0.0172169	0.0179494	4322
PRAD	MMP14	cg10418289_MMP14	0.231832	Up	2.61226e-24	2.53667e-23	4323
PRAD	MMP2	cg08133699_MMP2	-0.036558	Down	6.05622e-10	1.25011e-09	4313
PRAD	MMP3	cg17145397_MMP3	-0.0118708	Down	0.000605036	0.000724789	4314
PRAD	MMP9	cg00732815_MMP9	0.106632	Up	3.01482e-17	1.24517e-16	4318
PRAD	PECAM1	cg20830994_PECAM1	-0.0240565	Down	0.0312714	0.0316835	5175
PRAD	SERPINE1	cg01975495_SERPINE1	0.0406711	Up	0.000670624	0.000800208	5054
PRAD	TIMP2	cg00863893_TIMP2	0.0513034	Up	0.00230366	0.00262181	7077
PRAD	TNF	cg21467614_TNF	0.198299	Up	6.72281e-17	2.68855e-16	7124
PRAD	TNFRSF11B	cg19620294_TNFRSF11B	0.104374	Up	7.45669e-24	6.75787e-23	4982
THCA	ICAM1	cg10651168_ICAM1	-0.0336865	Down	1.85912e-07	4.30777e-07	3383
THCA	MMP1	cg14543953_MMP1	-0.0194203	Down	0.000713813	0.00101795	4312
THCA	MMP10	cg00347729_MMP10	-0.0660228	Down	2.25838e-09	6.40076e-09	4319
THCA	MMP12	cg09002726_MMP12	-0.0819775	Down	2.59479e-14	1.13051e-13	4321
THCA	MMP14	cg26433554_MMP14	0.0224912	Up	4.8155e-05	8.2618e-05	4323
THCA	MMP3	cg16466334_MMP3	-0.0471113	Down	1.64548e-17	9.01363e-17	4314
THCA	MMP9	cg00732815_MMP9	-0.127733	Down	6.92332e-26	6.20038e-25	4318
THCA	TIMP2	cg27549186_TIMP2	-0.374513	Down	2.90856e-103	5.6036e-101	7077
THCA	TNFRSF11B	cg17171407_TNFRSF11B	0.23262	Up	6.24475e-70	3.28849e-68	4982
UCEC	FGF2	cg08421768_FGF2	-0.0918826	Down	0.000564878	0.000698938	2247
UCEC	ICAM3	cg14145194_ICAM3	-0.060781	Down	7.0067e-05	9.3077e-05	3385
UCEC	ITGA2	cg09759260_ITGA2	-0.00622371	Down	0.0121684	0.0130732	3673
UCEC	LCP1	cg17771150_LCP1	-0.235419	Down	9.47664e-27	4.63477e-26	3936
UCEC	MMP1	cg13759446_MMP1	-0.059654	Down	2.87352e-06	4.19572e-06	4312
UCEC	MMP10	cg02061229_MMP10	-0.211071	Down	2.06048e-24	8.7907e-24	4319
UCEC	MMP12	cg20487452_MMP12	-0.307764	Down	8.91626e-62	2.31263e-60	4321
UCEC	MMP13	cg19620758_MMP13	-0.136746	Down	4.08144e-39	3.65619e-38	4322
UCEC	MMP14	cg24698488_MMP14	0.201455	Up	2.34264e-17	6.58894e-17	4323
UCEC	MMP2	cg09350341_MMP2	0.0191554	Up	7.34827e-06	1.0439e-05	4313
UCEC	MMP3	cg09615874_MMP3	-0.200245	Down	5.62822e-24	2.33999e-23	4314
UCEC	PECAM1	cg02459519_PECAM1	-0.023203	Down	0.000281302	0.000357078	5175
UCEC	SERPINE1	cg01975495_SERPINE1	-0.0940965	Down	5.7317e-10	1.04334e-09	5054
UCEC	SPP1	cg15460348_SPP1	-0.203697	Down	2.38195e-12	4.9691e-12	6696
UCEC	TIMP2	cg05306745_TIMP2	0.184223	Up	1.62076e-16	4.3353e-16	7077
UCEC	TNFRSF11B	cg13268132_TNFRSF11B	0.00777575	Up	0.0142114	0.0151421	4982
