# Supplementary material for: Pan-cancer analyses of senescence-related genes in extracellular matrix characterization in cancer
Source: Discov Oncol. 2023 Nov 20;14:208. doi: 10.1007/s12672-023-00828-7 (PMC10660488; doi:10.1007/s12672-023-00828-7)
Supplement: Supplementary file 22 — Supplementary file22 (XLSX 40 KB) [file 12672_2023_828_MOESM22_ESM.xlsx]

## Sheet: SheetName
Table S17 The detailed information about the correlations between methylation and mRNA expression in pan-cancer
cancertype	symbol	gene	spm	fdr	entrez
ACC	FGF2	cg25583174_FGF2	0.0803797	0.48053	2247
ACC	ICAM1	cg00500176_ICAM1	-0.379382	0.000616189	3383
ACC	ICAM3	cg05323251_ICAM3	-0.236879	0.0357938	3385
ACC	ITGA2	cg07737131_ITGA2	-0.145789	0.199421	3673
ACC	LCP1	cg17771150_LCP1	-0.553603	2.04624e-07	3936
ACC	MMP1	cg16575408_MMP1	-0.0603887	0.597031	4312
ACC	MMP10	cg00347729_MMP10	-0.102707	0.367738	4319
ACC	MMP12	cg02368591_MMP12	-0.0157997	0.890082	4321
ACC	MMP13	cg19620758_MMP13	0.0291993	0.798378	4322
ACC	MMP14	cg10599444_MMP14	-0.368257	0.000906846	4323
ACC	MMP2	cg27279620_MMP2	-0.0608569	0.593477	4313
ACC	MMP3	cg18113270_MMP3	-0.157722	0.165069	4314
ACC	MMP9	cg00732815_MMP9	-0.167989	0.138711	4318
ACC	PECAM1	cg00879592_PECAM1	-0.17758	0.117314	5175
ACC	SERPINE1	cg20438404_SERPINE1	-0.577483	4.72157e-08	5054
ACC	SPP1	cg00088885_SPP1	-0.22091	0.0505942	6696
ACC	TIMP2	cg05376904_TIMP2	-0.699684	0	7077
ACC	TNF	cg02137984_TNF	-0.328534	0.00311602	7124
ACC	TNFRSF11B	cg13268132_TNFRSF11B	-0.0107598	0.925019	4982
BLCA	FGF2	cg03941587_FGF2	-0.245486	5.61053e-07	2247
BLCA	ICAM1	cg26549174_ICAM1	-0.62214	4.44663e-45	3383
BLCA	ICAM3	cg14145194_ICAM3	-0.501837	0	3385
BLCA	ITGA2	cg02741854_ITGA2	0.0231721	0.640593	3673
BLCA	LCP1	cg17771150_LCP1	-0.203455	3.5998e-05	3936
BLCA	MMP1	cg16575408_MMP1	0.00329997	0.946996	4312
BLCA	MMP10	cg02061229_MMP10	-0.046071	0.35329	4319
BLCA	MMP12	cg02368591_MMP12	0.141041	0.00431142	4321
BLCA	MMP13	cg10085326_MMP13	-0.316176	6.35094e-11	4322
BLCA	MMP14	cg18207699_MMP14	-0.433133	0	4323
BLCA	MMP2	cg04049508_MMP2	0.373998	6.0796e-15	4313
BLCA	MMP3	cg16466334_MMP3	-0.252623	2.32602e-07	4314
BLCA	MMP9	cg00732815_MMP9	-0.192415	9.4534e-05	4318
BLCA	PECAM1	cg00427260_PECAM1	-0.0702546	0.156578	5175
BLCA	SERPINE1	cg01975495_SERPINE1	-0.322837	3.08655e-11	5054
BLCA	SPP1	cg00088885_SPP1	0.0828587	0.0946329	6696
BLCA	TIMP2	cg05306745_TIMP2	-0.461595	0	7077
BLCA	TNF	cg01360627_TNF	-0.230674	2.49244e-06	7124
BLCA	TNFRSF11B	cg26019549_TNFRSF11B	-0.0330324	0.505663	4982
BRCA	FGF2	cg24683623_FGF2	-0.419496	3.41468e-30	2247
BRCA	ICAM1	cg26549174_ICAM1	-0.484859	3.774e-41	3383
BRCA	ICAM3	cg14145194_ICAM3	-0.564656	3.4679e-58	3385
BRCA	ITGA2	cg08874888_ITGA2	-0.145812	0.000144369	3673
BRCA	LCP1	cg04341806_LCP1	-0.450349	0	3936
BRCA	MMP1	cg16575408_MMP1	-0.155516	4.8934e-05	4312
BRCA	MMP10	cg02061229_MMP10	-0.00792422	0.837063	4319
BRCA	MMP12	cg09002726_MMP12	-0.145017	0.000154654	4321
BRCA	MMP13	cg22658979_MMP13	-0.285109	4.1408e-14	4322
BRCA	MMP14	cg18207699_MMP14	-0.249326	4.87924e-11	4323
BRCA	MMP2	cg05782444_MMP2	-0.0884927	0.0214146	4313
BRCA	MMP3	cg17145397_MMP3	-0.26311	3.62614e-12	4314
BRCA	MMP9	cg02310296_MMP9	-0.128077	0.000852461	4318
BRCA	PECAM1	cg00427260_PECAM1	-0.297322	3.84439e-15	5175
BRCA	SERPINE1	cg16617872_SERPINE1	-0.0601561	0.118152	5054
BRCA	SPP1	cg20261167_SPP1	-0.0501357	0.192939	6696
BRCA	TIMP2	cg19295840_TIMP2	-0.475907	1.66463e-39	7077
BRCA	TNF	cg01360627_TNF	-0.390905	0	7124
BRCA	TNFRSF11B	cg12545993_TNFRSF11B	-0.340851	7.49616e-20	4982
CESC	FGF2	cg24683623_FGF2	-0.330019	4.61054e-09	2247
CESC	ICAM1	cg26549174_ICAM1	-0.522524	0	3383
CESC	ICAM3	cg14145194_ICAM3	-0.501612	0	3385
CESC	ITGA2	cg07737131_ITGA2	-0.110151	0.0550854	3673
CESC	LCP1	cg04341806_LCP1	-0.602029	0	3936
CESC	MMP1	cg13759446_MMP1	0.0120209	0.834562	4312
CESC	MMP10	cg02061229_MMP10	-0.0227838	0.692353	4319
CESC	MMP12	cg20487452_MMP12	-0.188968	0.000946928	4321
CESC	MMP13	cg19710916_MMP13	-0.332984	2.63938e-09	4322
CESC	MMP14	cg26255831_MMP14	-0.454131	0	4323
CESC	MMP2	cg04049508_MMP2	0.154365	0.00705497	4313
CESC	MMP3	cg16466334_MMP3	-0.232412	4.2821e-05	4314
CESC	MMP9	cg26132320_MMP9	-0.281218	6.95034e-07	4318
CESC	PECAM1	cg00427260_PECAM1	-0.372909	2.54114e-11	5175
CESC	SERPINE1	cg15874872_SERPINE1	-0.183223	0.00135534	5054
CESC	SPP1	cg00088885_SPP1	-0.163072	0.00440321	6696
CESC	TIMP2	cg05306745_TIMP2	-0.410338	8.79517e-14	7077
CESC	TNF	cg06825478_TNF	-0.3557	2.26637e-10	7124
CESC	TNFRSF11B	cg04857420_TNFRSF11B	-0.304308	6.20342e-08	4982
CHOL	FGF2	cg21550024_FGF2	-0.450965	0.00622064	2247
CHOL	ICAM1	cg10651168_ICAM1	-0.20592	0.227355	3383
CHOL	ICAM3	cg05323251_ICAM3	-0.514801	0.00152233	3385
CHOL	ITGA2	cg08446038_ITGA2	-0.584299	0.00023897	3673
CHOL	LCP1	cg17771150_LCP1	-0.857658	1.60894e-08	3936
CHOL	MMP1	cg13759446_MMP1	-0.039897	0.816928	4312
CHOL	MMP10	cg02061229_MMP10	-0.0581725	0.735368	4319
CHOL	MMP12	cg20487452_MMP12	-0.304325	0.0711395	4321
CHOL	MMP13	cg22658979_MMP13	-0.534881	0.00077684	4322
CHOL	MMP14	cg10418289_MMP14	-0.350837	0.0365334	4323
CHOL	MMP2	cg12317456_MMP2	-0.175804	0.303822	4313
CHOL	MMP3	cg09615874_MMP3	-0.120174	0.485094	4314
CHOL	MMP9	cg00732815_MMP9	-0.469241	0.00426203	4318
CHOL	PECAM1	cg00427260_PECAM1	-0.473874	0.00386073	5175
CHOL	SERPINE1	cg02273392_SERPINE1	-0.328185	0.0512192	5054
CHOL	SPP1	cg15460348_SPP1	-0.64453	3.3962e-05	6696
CHOL	TIMP2	cg11342615_TIMP2	0.023166	0.893341	7077
CHOL	TNF	cg01360627_TNF	-0.436551	0.00827444	7124
CHOL	TNFRSF11B	cg04857420_TNFRSF11B	-0.562934	0.000439806	4982
COAD	FGF2	cg09108314_FGF2	-0.201039	0.000912847	2247
COAD	ICAM1	cg00500176_ICAM1	-0.399466	1.28628e-11	3383
COAD	ICAM3	cg14145194_ICAM3	-0.506694	0	3385
COAD	ITGA2	cg17480554_ITGA2	-0.163642	0.00710174	3673
COAD	LCP1	cg04341806_LCP1	-0.530438	0	3936
COAD	MMP1	cg14543953_MMP1	0.151338	0.0128552	4312
COAD	MMP10	cg02061229_MMP10	0.151634	0.0126144	4319
COAD	MMP12	cg09002726_MMP12	0.0785918	0.197825	4321
COAD	MMP13	cg03331229_MMP13	-0.107957	0.0765835	4322
COAD	MMP14	cg26433554_MMP14	-0.416835	1.10133e-12	4323
COAD	MMP2	cg00355286_MMP2	0.447007	0	4313
COAD	MMP3	cg16466334_MMP3	-0.153426	0.0116563	4314
COAD	MMP9	cg26132320_MMP9	-0.349269	4.6501e-09	4318
COAD	PECAM1	cg00427260_PECAM1	-0.203548	0.000784689	5175
COAD	SERPINE1	cg01975495_SERPINE1	-0.46901	0	5054
COAD	SPP1	cg20261167_SPP1	0.227321	0.000171283	6696
COAD	TIMP2	cg13694343_TIMP2	-0.438544	0	7077
COAD	TNF	cg09637172_TNF	-0.251892	2.9925e-05	7124
COAD	TNFRSF11B	cg17171407_TNFRSF11B	-0.211931	0.000467265	4982
DLBC	FGF2	cg14887335_FGF2	0.139601	0.342866	2247
DLBC	ICAM1	cg02776148_ICAM1	-0.32957	0.02262	3383
DLBC	ICAM3	cg14145194_ICAM3	-0.317629	0.0282601	3385
DLBC	ITGA2	cg08446038_ITGA2	-0.000868432	0.995601	3673
DLBC	LCP1	cg07880943_LCP1	-0.271385	0.0623412	3936
DLBC	MMP1	cg25320665_MMP1	0.0856492	0.561598	4312
DLBC	MMP10	cg02061229_MMP10	0.100144	0.498258	4319
DLBC	MMP12	cg14948108_MMP12	-0.132327	0.368789	4321
DLBC	MMP13	cg03331229_MMP13	-0.152985	0.299224	4322
DLBC	MMP14	cg10006956_MMP14	-0.358988	0.0126329	4323
DLBC	MMP2	cg00355286_MMP2	0.0894485	0.544308	4313
DLBC	MMP3	cg09615874_MMP3	-0.153516	0.297529	4314
DLBC	MMP9	cg23303369_MMP9	-0.349218	0.0154138	4318
DLBC	PECAM1	cg00427260_PECAM1	-0.0931394	0.527763	5175
DLBC	SERPINE1	cg19722814_SERPINE1	-0.265849	0.0680398	5054
DLBC	SPP1	cg15460348_SPP1	0.223838	0.125994	6696
DLBC	TIMP2	cg13694343_TIMP2	-0.223079	0.12731	7077
DLBC	TNF	cg04472685_TNF	-0.148611	0.312372	7124
DLBC	TNFRSF11B	cg19620294_TNFRSF11B	-0.200179	0.172512	4982
ESCA	FGF2	cg14703482_FGF2	0.213974	0.0036002	2247
ESCA	ICAM1	cg26549174_ICAM1	-0.407417	1.29441e-08	3383
ESCA	ICAM3	cg14145194_ICAM3	-0.590247	0	3385
ESCA	ITGA2	cg17480554_ITGA2	-0.285654	9.0529e-05	3673
ESCA	LCP1	cg04341806_LCP1	-0.480309	3.24383e-12	3936
ESCA	MMP1	cg13759446_MMP1	-0.110487	0.135324	4312
ESCA	MMP10	cg02061229_MMP10	0.00228468	0.975431	4319
ESCA	MMP12	cg20487452_MMP12	0.0963052	0.193255	4321
ESCA	MMP13	cg10085326_MMP13	-0.171279	0.0200874	4322
ESCA	MMP14	cg10418289_MMP14	-0.531531	0	4323
ESCA	MMP2	cg08318842_MMP2	-0.124101	0.0932541	4313
ESCA	MMP3	cg18113270_MMP3	-0.106031	0.151874	4314
ESCA	MMP9	cg23303369_MMP9	-0.267383	0.000255485	4318
ESCA	PECAM1	cg00427260_PECAM1	-0.249672	0.000654034	5175
ESCA	SERPINE1	cg02273392_SERPINE1	-0.320344	1.037e-05	5054
ESCA	SPP1	cg00088885_SPP1	-0.0501531	0.498626	6696
ESCA	TIMP2	cg05306745_TIMP2	-0.249198	0.000670109	7077
ESCA	TNF	cg17755321_TNF	-0.450151	1.44492e-10	7124
ESCA	TNFRSF11B	cg04857420_TNFRSF11B	-0.626563	0	4982
GBM	FGF2	cg14887335_FGF2	-0.0142986	0.920631	2247
GBM	ICAM1	cg12151124_ICAM1	-0.357919	0.0102794	3383
GBM	ICAM3	cg05323251_ICAM3	-0.162715	0.25312	3385
GBM	ITGA2	cg08874888_ITGA2	-0.0693213	0.627894	3673
GBM	LCP1	cg04341806_LCP1	-0.748597	0	3936
GBM	MMP1	cg13759446_MMP1	0.173033	0.224651	4312
GBM	MMP10	cg00347729_MMP10	-0.0554296	0.699252	4319
GBM	MMP12	cg09002726_MMP12	-0.13688	0.338161	4321
GBM	MMP13	cg10085326_MMP13	-0.127627	0.372124	4322
GBM	MMP14	cg10576725_MMP14	-0.471674	0.000549943	4323
GBM	MMP2	cg00078334_MMP2	-0.0980995	0.492295	4313
GBM	MMP3	cg06618666_MMP3	0.11818	0.408834	4314
GBM	MMP9	cg10505873_MMP9	-0.237919	0.0927746	4318
GBM	PECAM1	cg00427260_PECAM1	-0.206425	0.145835	5175
GBM	SERPINE1	cg01975495_SERPINE1	-0.357285	0.0104222	5054
GBM	SPP1	cg11226901_SPP1	-0.0167421	0.907081	6696
GBM	TIMP2	cg11342615_TIMP2	-0.313484	0.0255079	7077
GBM	TNF	cg06825478_TNF	-0.176923	0.213584	7124
GBM	TNFRSF11B	cg17171407_TNFRSF11B	-0.209955	0.138954	4982
HNSC	FGF2	cg17214107_FGF2	-0.539052	0	2247
HNSC	ICAM1	cg26549174_ICAM1	-0.27053	4.21549e-10	3383
HNSC	ICAM3	cg14145194_ICAM3	-0.491139	6.32658e-33	3385
HNSC	ITGA2	cg07737131_ITGA2	-0.0869761	0.0474651	3673
HNSC	LCP1	cg04341806_LCP1	-0.418854	0	3936
HNSC	MMP1	cg16575408_MMP1	-0.0668637	0.127789	4312
HNSC	MMP10	cg02061229_MMP10	-0.0182371	0.678114	4319
HNSC	MMP12	cg09002726_MMP12	0.0682932	0.119828	4321
HNSC	MMP13	cg19710916_MMP13	-0.353266	9.86416e-17	4322
HNSC	MMP14	cg04219048_MMP14	-0.208335	1.7439e-06	4323
HNSC	MMP2	cg05782444_MMP2	0.015995	0.715852	4313
HNSC	MMP3	cg16466334_MMP3	-0.390229	0	4314
HNSC	MMP9	cg00732815_MMP9	-0.0330212	0.45229	4318
HNSC	PECAM1	cg00427260_PECAM1	-0.194063	8.64865e-06	5175
HNSC	SERPINE1	cg02704552_SERPINE1	-0.279082	1.12128e-10	5054
HNSC	SPP1	cg00088885_SPP1	-0.0398558	0.364273	6696
HNSC	TIMP2	cg00863893_TIMP2	-0.243388	2.10456e-08	7077
HNSC	TNF	cg17741993_TNF	-0.204328	2.62934e-06	7124
HNSC	TNFRSF11B	cg19620294_TNFRSF11B	-0.20252	3.23371e-06	4982
KICH	FGF2	cg25583174_FGF2	-0.2296	0.0638317	2247
KICH	ICAM1	cg20036207_ICAM1	-0.215364	0.082518	3383
KICH	ICAM3	cg05323251_ICAM3	-0.208183	0.0934717	3385
KICH	ITGA2	cg07737131_ITGA2	0.0532095	0.670633	3673
KICH	LCP1	cg17771150_LCP1	-0.839265	0	3936
KICH	MMP1	cg16575408_MMP1	-0.0117358	0.925487	4312
KICH	MMP10	cg02061229_MMP10	-0.170789	0.170348	4319
KICH	MMP12	cg09002726_MMP12	-0.262055	0.0335391	4321
KICH	MMP13	cg10085326_MMP13	-0.0993198	0.42753	4322
KICH	MMP14	cg27020028_MMP14	-0.329339	0.00716964	4323
KICH	MMP2	cg04049508_MMP2	-0.0366768	0.769517	4313
KICH	MMP3	cg09615874_MMP3	-0.173323	0.164001	4314
KICH	MMP9	cg00732815_MMP9	-0.214696	0.0834918	4318
KICH	PECAM1	cg02459519_PECAM1	-0.231604	0.0615015	5175
KICH	SERPINE1	cg01975495_SERPINE1	-0.367623	0.00253973	5054
KICH	SPP1	cg20261167_SPP1	-0.412128	0.000649395	6696
KICH	TIMP2	cg26927190_TIMP2	-0.466903	9.3482e-05	7077
KICH	TNF	cg10650821_TNF	-0.471975	6.3158e-05	7124
KICH	TNFRSF11B	cg17171407_TNFRSF11B	-0.470661	8.0909e-05	4982
KIRC	FGF2	cg03737475_FGF2	0.137251	0.0143617	2247
KIRC	ICAM1	cg26549174_ICAM1	-0.400119	1.36362e-13	3383
KIRC	ICAM3	cg05323251_ICAM3	-0.622095	0	3385
KIRC	ITGA2	cg05928650_ITGA2	0.135266	0.0158468	3673
KIRC	LCP1	cg17771150_LCP1	-0.569807	0	3936
KIRC	MMP1	cg13759446_MMP1	-0.0217988	0.698576	4312
KIRC	MMP10	cg00347729_MMP10	-0.0748841	0.182864	4319
KIRC	MMP12	cg23979520_MMP12	-0.131667	0.0188267	4321
KIRC	MMP13	cg14995062_MMP13	-0.136718	0.0146914	4322
KIRC	MMP14	cg24698488_MMP14	-0.421272	0	4323
KIRC	MMP2	cg00087906_MMP2	-0.0786707	0.161569	4313
KIRC	MMP3	cg16466334_MMP3	-0.260585	2.47439e-06	4314
KIRC	MMP9	cg04656101_MMP9	-0.068522	0.222887	4318
KIRC	PECAM1	cg00879592_PECAM1	-0.278205	5.15658e-07	5175
KIRC	SERPINE1	cg12584355_SERPINE1	-0.316668	9.36387e-09	5054
KIRC	SPP1	cg15460348_SPP1	-0.179517	0.0013259	6696
KIRC	TIMP2	cg00863893_TIMP2	-0.325014	3.6349e-09	7077
KIRC	TNF	cg09637172_TNF	-0.220753	7.1818e-05	7124
KIRC	TNFRSF11B	cg17171407_TNFRSF11B	-0.442279	0	4982
KIRP	FGF2	cg12632152_FGF2	-0.0209143	0.730198	2247
KIRP	ICAM1	cg26549174_ICAM1	-0.607393	0	3383
KIRP	ICAM3	cg05323251_ICAM3	-0.649962	0	3385
KIRP	ITGA2	cg20674638_ITGA2	0.110281	0.0683713	3673
KIRP	LCP1	cg17771150_LCP1	-0.789352	0	3936
KIRP	MMP1	cg14543953_MMP1	-0.301804	3.5406e-07	4312
KIRP	MMP10	cg00347729_MMP10	-0.0509627	0.400755	4319
KIRP	MMP12	cg09002726_MMP12	-0.366121	4.07677e-10	4321
KIRP	MMP13	cg03331229_MMP13	-0.172636	0.00415528	4322
KIRP	MMP14	cg10418289_MMP14	-0.707312	0	4323
KIRP	MMP2	cg09350341_MMP2	0.302412	3.82276e-07	4313
KIRP	MMP3	cg09615874_MMP3	-0.201094	0.000814743	4314
KIRP	MMP9	cg00732815_MMP9	-0.0607571	0.316116	4318
KIRP	PECAM1	cg00427260_PECAM1	-0.412347	1.4499e-12	5175
KIRP	SERPINE1	cg17968347_SERPINE1	-0.451363	0	5054
KIRP	SPP1	cg15460348_SPP1	-0.0363925	0.548378	6696
KIRP	TIMP2	cg11342615_TIMP2	-0.269378	6.62679e-06	7077
KIRP	TNF	cg21467614_TNF	-0.594359	1.46663e-27	7124
KIRP	TNFRSF11B	cg17171407_TNFRSF11B	-0.393008	2.09763e-11	4982
LAML	FGF2	cg12632152_FGF2	0.0804836	0.296796	2247
LAML	ICAM1	cg10651168_ICAM1	-0.260984	0.000611005	3383
LAML	ICAM3	cg14145194_ICAM3	-0.602386	0	3385
LAML	ITGA2	cg07737131_ITGA2	0.094859	0.218289	3673
LAML	LCP1	cg02696428_LCP1	-0.353939	2.56313e-06	3936
LAML	MMP1	cg16575408_MMP1	-0.198458	0.00947719	4312
LAML	MMP10	cg02061229_MMP10	-0.0946398	0.219595	4319
LAML	MMP12	cg02368591_MMP12	-0.0373191	0.628982	4321
LAML	MMP13	cg19710916_MMP13	-0.196615	0.0101768	4322
LAML	MMP14	cg13094752_MMP14	-0.489676	9.21638e-12	4323
LAML	MMP2	cg00078334_MMP2	-0.458882	4.62568e-10	4313
LAML	MMP3	cg17145397_MMP3	-0.118523	0.123713	4314
LAML	MMP9	cg04656101_MMP9	-0.145991	0.0574809	4318
LAML	PECAM1	cg20830994_PECAM1	-0.136444	0.0760539	5175
LAML	SERPINE1	cg20583316_SERPINE1	-0.0823456	0.285414	5054
LAML	SPP1	cg20261167_SPP1	0.0181644	0.814126	6696
LAML	TIMP2	cg11342615_TIMP2	-0.343385	5.22386e-06	7077
LAML	TNF	cg04472685_TNF	0.0419674	0.586861	7124
LAML	TNFRSF11B	cg13268132_TNFRSF11B	-0.371166	6.26475e-07	4982
LGG	FGF2	cg03941587_FGF2	-0.114117	0.00950624	2247
LGG	ICAM1	cg00500176_ICAM1	-0.373716	0	3383
LGG	ICAM3	cg14145194_ICAM3	-0.34676	6.05747e-16	3385
LGG	ITGA2	cg08874888_ITGA2	0.102631	0.0197443	3673
LGG	LCP1	cg17771150_LCP1	-0.644758	0	3936
LGG	MMP1	cg16575408_MMP1	-0.0107061	0.808305	4312
LGG	MMP10	cg00347729_MMP10	-0.0145275	0.74199	4319
LGG	MMP12	cg14948108_MMP12	-0.0237189	0.590881	4321
LGG	MMP13	cg24301681_MMP13	-0.127833	0.00362927	4322
LGG	MMP14	cg08321366_MMP14	-0.676616	0	4323
LGG	MMP2	cg00078334_MMP2	-0.226677	2.10197e-07	4313
LGG	MMP3	cg23438592_MMP3	-0.185972	2.1247e-05	4314
LGG	MMP9	cg10505873_MMP9	-0.222705	3.2055e-07	4318
LGG	PECAM1	cg20830994_PECAM1	-0.298248	5.88425e-12	5175
LGG	SERPINE1	cg19722814_SERPINE1	-0.408151	0	5054
LGG	SPP1	cg00088885_SPP1	-0.245004	1.91555e-08	6696
LGG	TIMP2	cg05376904_TIMP2	-0.231284	1.172e-07	7077
LGG	TNF	cg23384708_TNF	-0.026197	0.552565	7124
LGG	TNFRSF11B	cg17171407_TNFRSF11B	-0.412392	1.32123e-22	4982
LIHC	FGF2	cg15128226_FGF2	-0.399515	1.1943e-15	2247
LIHC	ICAM1	cg00500176_ICAM1	-0.525843	0	3383
LIHC	ICAM3	cg13981319_ICAM3	-0.216249	2.7763e-05	3385
LIHC	ITGA2	cg04996689_ITGA2	-0.373519	1.31533e-13	3673
LIHC	LCP1	cg17771150_LCP1	-0.512655	0	3936
LIHC	MMP1	cg25320665_MMP1	0.267446	1.69912e-07	4312
LIHC	MMP10	cg00347729_MMP10	0.117034	0.0241727	4319
LIHC	MMP12	cg20487452_MMP12	0.186995	0.000292773	4321
LIHC	MMP13	cg22658979_MMP13	-0.120582	0.0201676	4322
LIHC	MMP14	cg10418289_MMP14	-0.378572	5.43996e-14	4323
LIHC	MMP2	cg26795346_MMP2	0.232755	6.25274e-06	4313
LIHC	MMP3	cg18113270_MMP3	0.10848	0.0367442	4314
LIHC	MMP9	cg15876464_MMP9	-0.0182233	0.726329	4318
LIHC	PECAM1	cg00427260_PECAM1	-0.0422518	0.416935	5175
LIHC	SERPINE1	cg02273392_SERPINE1	-0.502586	0	5054
LIHC	SPP1	cg15460348_SPP1	-0.745552	0	6696
LIHC	TIMP2	cg05306745_TIMP2	-0.488177	1.29791e-23	7077
LIHC	TNF	cg21370522_TNF	-0.409188	2.07854e-16	7124
LIHC	TNFRSF11B	cg12057741_TNFRSF11B	-0.143827	0.00551329	4982
LUAD	FGF2	cg24683623_FGF2	-0.345012	5.26512e-14	2247
LUAD	ICAM1	cg02776148_ICAM1	-0.713789	0	3383
LUAD	ICAM3	cg14145194_ICAM3	-0.633636	0	3385
LUAD	ITGA2	cg15676241_ITGA2	-0.00194582	0.967008	3673
LUAD	LCP1	cg04341806_LCP1	-0.529096	0	3936
LUAD	MMP1	cg16575408_MMP1	-0.237013	3.51142e-07	4312
LUAD	MMP10	cg02061229_MMP10	-0.0265077	0.573198	4319
LUAD	MMP12	cg20487452_MMP12	-0.212621	5.12756e-06	4321
LUAD	MMP13	cg10085326_MMP13	-0.423964	3.12538e-21	4322
LUAD	MMP14	cg10418289_MMP14	-0.564934	0	4323
LUAD	MMP2	cg04049508_MMP2	0.174186	0.000195807	4313
LUAD	MMP3	cg16466334_MMP3	-0.220816	2.02625e-06	4314
LUAD	MMP9	cg12071656_MMP9	-0.0330445	0.482323	4318
LUAD	PECAM1	cg02459519_PECAM1	-0.27984	1.52832e-09	5175
LUAD	SERPINE1	cg17968347_SERPINE1	-0.265294	1.07823e-08	5054
LUAD	SPP1	cg20261167_SPP1	-0.183569	8.5807e-05	6696
LUAD	TIMP2	cg00863893_TIMP2	-0.383978	0	7077
LUAD	TNF	cg02137984_TNF	-0.342966	7.62287e-14	7124
LUAD	TNFRSF11B	cg17171407_TNFRSF11B	-0.19331	3.4887e-05	4982
LUSC	FGF2	cg14887335_FGF2	0.0465896	0.370705	2247
LUSC	ICAM1	cg26549174_ICAM1	-0.502957	0	3383
LUSC	ICAM3	cg14145194_ICAM3	-0.589555	0	3385
LUSC	ITGA2	cg15676241_ITGA2	0.0694351	0.181951	3673
LUSC	LCP1	cg04341806_LCP1	-0.490093	0	3936
LUSC	MMP1	cg16575408_MMP1	-0.0692069	0.183394	4312
LUSC	MMP10	cg02061229_MMP10	-0.0502797	0.334146	4319
LUSC	MMP12	cg09002726_MMP12	-0.0470807	0.365678	4321
LUSC	MMP13	cg19710916_MMP13	-0.510421	0	4322
LUSC	MMP14	cg18207699_MMP14	-0.381697	3.06783e-14	4323
LUSC	MMP2	cg00087906_MMP2	0.179863	0.000508953	4313
LUSC	MMP3	cg16466334_MMP3	-0.278947	4.66609e-08	4314
LUSC	MMP9	cg00732815_MMP9	-0.207119	6.0445e-05	4318
LUSC	PECAM1	cg00427260_PECAM1	-0.150562	0.00368135	5175
LUSC	SERPINE1	cg08053846_SERPINE1	-0.188397	0.000269297	5054
LUSC	SPP1	cg20261167_SPP1	-0.182241	0.000427418	6696
LUSC	TIMP2	cg13694343_TIMP2	-0.179431	0.000525232	7077
LUSC	TNF	cg01360627_TNF	-0.291382	1.26192e-08	7124
LUSC	TNFRSF11B	cg19620294_TNFRSF11B	-0.253068	8.5801e-07	4982
MESO	FGF2	cg12632152_FGF2	-0.142287	0.188268	2247
MESO	ICAM1	cg20036207_ICAM1	-0.42369	5.1046e-05	3383
MESO	ICAM3	cg14145194_ICAM3	-0.657177	0	3385
MESO	ITGA2	cg15676241_ITGA2	-0.0968506	0.371487	3673
MESO	LCP1	cg17771150_LCP1	-0.697693	0	3936
MESO	MMP1	cg14543953_MMP1	-0.0502937	0.64364	4312
MESO	MMP10	cg00347729_MMP10	-0.0582934	0.59174	4319
MESO	MMP12	cg20487452_MMP12	-0.123706	0.25364	4321
MESO	MMP13	cg22658979_MMP13	-0.291484	0.00615875	4322
MESO	MMP14	cg18207699_MMP14	-0.475323	4.3462e-06	4323
MESO	MMP2	cg09350341_MMP2	-0.0676168	0.533059	4313
MESO	MMP3	cg16466334_MMP3	-0.143053	0.186228	4314
MESO	MMP9	cg00732815_MMP9	-0.163738	0.129518	4318
MESO	PECAM1	cg00427260_PECAM1	-0.439582	2.4863e-05	5175
MESO	SERPINE1	cg02704552_SERPINE1	-0.504538	9.08867e-07	5054
MESO	SPP1	cg15460348_SPP1	-0.199533	0.0640096	6696
MESO	TIMP2	cg27549186_TIMP2	-0.266713	0.0127319	7077
MESO	TNF	cg26729380_TNF	-0.396242	0.000163805	7124
MESO	TNFRSF11B	cg17171407_TNFRSF11B	-0.421958	5.5097e-05	4982
OV	FGF2	cg09108314_FGF2	-0.366667	0.33626	2247
OV	ICAM1	cg00500176_ICAM1	-0.666667	0.05889	3383
OV	ICAM3	cg14145194_ICAM3	-0.383333	0.3125	3385
OV	ITGA2	cg08874888_ITGA2	0.116667	0.775628	3673
OV	LCP1	cg17771150_LCP1	-0.666667	0.05889	3936
OV	MMP1	cg14543953_MMP1	0.0666667	0.880093	4312
OV	MMP10	cg02061229_MMP10	-0.183333	0.64364	4319
OV	MMP12	cg20487452_MMP12	-0.2	0.613404	4321
OV	MMP13	cg07048132_MMP13	-0.416667	0.269582	4322
OV	MMP14	cg26433554_MMP14	-0.783333	0.0172233	4323
OV	MMP2	cg22950163_MMP2	-0.366667	0.33626	4313
OV	MMP3	cg09615874_MMP3	-0.702935	0.0346701	4314
OV	MMP9	cg00732815_MMP9	-0.716667	0.0368662	4318
OV	PECAM1	cg02459519_PECAM1	-0.9	0.00202822	5175
OV	SERPINE1	cg15874872_SERPINE1	-0.35	0.358581	5054
OV	SPP1	cg20261167_SPP1	-0.233333	0.551709	6696
OV	TIMP2	cg15981475_TIMP2	-0.7	0.043254	7077
OV	TNF	cg02137984_TNF	-0.883333	0.0030754	7124
OV	TNFRSF11B	cg17293641_TNFRSF11B	-0.45	0.229817	4982
PAAD	FGF2	cg03737475_FGF2	0.164175	0.0286386	2247
PAAD	ICAM1	cg26549174_ICAM1	-0.385786	1.33348e-07	3383
PAAD	ICAM3	cg05323251_ICAM3	-0.639811	0	3385
PAAD	ITGA2	cg04996689_ITGA2	0.0736088	0.328503	3673
PAAD	LCP1	cg17771150_LCP1	-0.60747	0	3936
PAAD	MMP1	cg13759446_MMP1	-0.178046	0.0175241	4312
PAAD	MMP10	cg02061229_MMP10	-0.0364783	0.628802	4319
PAAD	MMP12	cg09002726_MMP12	0.00490569	0.948141	4321
PAAD	MMP13	cg10085326_MMP13	-0.353232	1.32263e-06	4322
PAAD	MMP14	cg18207699_MMP14	-0.259265	0.000494586	4323
PAAD	MMP2	cg10079740_MMP2	-0.202521	0.00678941	4313
PAAD	MMP3	cg16466334_MMP3	-0.338515	3.80559e-06	4314
PAAD	MMP9	cg02310296_MMP9	-0.240087	0.00128297	4318
PAAD	PECAM1	cg02459519_PECAM1	-0.487614	2.00982e-12	5175
PAAD	SERPINE1	cg01975495_SERPINE1	-0.401944	3.56681e-08	5054
PAAD	SPP1	cg15460348_SPP1	-0.11532	0.125238	6696
PAAD	TIMP2	cg26927190_TIMP2	-0.596027	0	7077
PAAD	TNF	cg01360627_TNF	-0.367388	5.51979e-07	7124
PAAD	TNFRSF11B	cg17171407_TNFRSF11B	-0.186785	0.0126429	4982
PCPG	FGF2	cg03737475_FGF2	0.236807	0.00145363	2247
PCPG	ICAM1	cg13720472_ICAM1	-0.030812	0.681933	3383
PCPG	ICAM3	cg14145194_ICAM3	-0.173383	0.020388	3385
PCPG	ITGA2	cg05928650_ITGA2	0.0456741	0.543426	3673
PCPG	LCP1	cg06477663_LCP1	-0.284205	0.000122921	3936
PCPG	MMP1	cg13759446_MMP1	0.118884	0.112956	4312
PCPG	MMP10	cg00347729_MMP10	0.0611631	0.416025	4319
PCPG	MMP12	cg14948108_MMP12	-0.00093446	0.990095	4321
PCPG	MMP13	cg03067994_MMP13	-0.112175	0.134913	4322
PCPG	MMP14	cg27020028_MMP14	-0.120357	0.10849	4323
PCPG	MMP2	cg05782444_MMP2	-0.0961396	0.20027	4313
PCPG	MMP3	cg18113270_MMP3	-0.176398	0.0181737	4314
PCPG	MMP9	cg00732815_MMP9	-0.275247	0.000202904	4318
PCPG	PECAM1	cg02459519_PECAM1	-0.0239575	0.750008	5175
PCPG	SERPINE1	cg01975495_SERPINE1	-0.203404	0.00639664	5054
PCPG	SPP1	cg15460348_SPP1	0.0317766	0.672542	6696
PCPG	TIMP2	cg01698392_TIMP2	-0.226774	0.00231857	7077
PCPG	TNF	cg21370522_TNF	-0.209303	0.00492525	7124
PCPG	TNFRSF11B	cg13268132_TNFRSF11B	-0.159422	0.0330373	4982
PRAD	FGF2	cg03941587_FGF2	-0.605849	0	2247
PRAD	ICAM1	cg00500176_ICAM1	-0.308774	2.51593e-12	3383
PRAD	ICAM3	cg14145194_ICAM3	-0.0974143	0.0299353	3385
PRAD	ITGA2	cg15676241_ITGA2	0.335855	1.93431e-14	3673
PRAD	LCP1	cg10983853_LCP1	-0.414994	0	3936
PRAD	MMP1	cg16575408_MMP1	0.093074	0.0380584	4312
PRAD	MMP10	cg02061229_MMP10	-0.139283	0.00187122	4319
PRAD	MMP12	cg09002726_MMP12	-0.0587485	0.191029	4321
PRAD	MMP13	cg22658979_MMP13	-0.21234	1.7841e-06	4322
PRAD	MMP14	cg10418289_MMP14	-0.648662	0	4323
PRAD	MMP2	cg08133699_MMP2	-0.171764	0.000121672	4313
PRAD	MMP3	cg17145397_MMP3	-0.147947	0.000939094	4314
PRAD	MMP9	cg00732815_MMP9	-0.203072	5.27267e-06	4318
PRAD	PECAM1	cg20830994_PECAM1	-0.221247	6.73708e-07	5175
PRAD	SERPINE1	cg01975495_SERPINE1	-0.237095	9.68914e-08	5054
PRAD	SPP1	cg00088885_SPP1	-0.0717759	0.110006	6696
PRAD	TIMP2	cg00863893_TIMP2	-0.757851	0	7077
PRAD	TNF	cg21467614_TNF	-0.245239	3.05486e-08	7124
PRAD	TNFRSF11B	cg19620294_TNFRSF11B	-0.131212	0.00338435	4982
READ	FGF2	cg09108314_FGF2	0.0666122	0.527446	2247
READ	ICAM1	cg00500176_ICAM1	-0.37281	0.000278177	3383
READ	ICAM3	cg14145194_ICAM3	-0.314952	0.00232895	3385
READ	ITGA2	cg08874888_ITGA2	0.311807	0.00258603	3673
READ	LCP1	cg06477663_LCP1	-0.449332	8.84152e-06	3936
READ	MMP1	cg14543953_MMP1	0.12071	0.251232	4312
READ	MMP10	cg00347729_MMP10	0.0726693	0.490517	4319
READ	MMP12	cg14948108_MMP12	0.00869257	0.934384	4321
READ	MMP13	cg03067994_MMP13	-0.105297	0.317217	4322
READ	MMP14	cg10418289_MMP14	-0.409244	5.9349e-05	4323
READ	MMP2	cg04049508_MMP2	0.5728	3.99945e-09	4313
READ	MMP3	cg09615874_MMP3	-0.00784489	0.940776	4314
READ	MMP9	cg08176368_MMP9	-0.257525	0.0134045	4318
READ	PECAM1	cg00427260_PECAM1	-0.216821	0.0380811	5175
READ	SERPINE1	cg12584355_SERPINE1	-0.147974	0.158981	5054
READ	SPP1	cg20261167_SPP1	0.174915	0.0953642	6696
READ	TIMP2	cg13694343_TIMP2	-0.563738	8.54185e-09	7077
READ	TNF	cg17741993_TNF	-0.226253	0.0303114	7124
READ	TNFRSF11B	cg17171407_TNFRSF11B	-0.258758	0.0129553	4982
SARC	FGF2	cg17547898_FGF2	0.364216	2.0035e-09	2247
SARC	ICAM1	cg26549174_ICAM1	-0.332522	5.06984e-08	3383
SARC	ICAM3	cg05323251_ICAM3	-0.682954	0	3385
SARC	ITGA2	cg08874888_ITGA2	0.0553774	0.37452	3673
SARC	LCP1	cg17771150_LCP1	-0.567028	0	3936
SARC	MMP1	cg16575408_MMP1	-0.147279	0.0177059	4312
SARC	MMP10	cg00347729_MMP10	-0.131377	0.0345791	4319
SARC	MMP12	cg20487452_MMP12	-0.0409606	0.511641	4321
SARC	MMP13	cg22658979_MMP13	-0.511194	1.2023e-18	4322
SARC	MMP14	cg04219048_MMP14	-0.419873	2.22375e-12	4323
SARC	MMP2	cg14400118_MMP2	0.011045	0.859497	4313
SARC	MMP3	cg16466334_MMP3	-0.231513	0.000170573	4314
SARC	MMP9	cg02310296_MMP9	-0.238639	0.000110041	4318
SARC	PECAM1	cg00427260_PECAM1	-0.246561	6.3667e-05	5175
SARC	SERPINE1	cg01975495_SERPINE1	-0.361706	2.62201e-09	5054
SARC	SPP1	cg00088885_SPP1	-0.407768	1.19148e-11	6696
SARC	TIMP2	cg13694343_TIMP2	-0.330865	5.94611e-08	7077
SARC	TNF	cg23384708_TNF	-0.273203	8.1704e-06	7124
SARC	TNFRSF11B	cg17293641_TNFRSF11B	-0.119575	0.0546095	4982
SKCM	FGF2	cg24683623_FGF2	-0.596772	0	2247
SKCM	ICAM1	cg10651168_ICAM1	-0.428795	0	3383
SKCM	ICAM3	cg14145194_ICAM3	-0.684754	0	3385
SKCM	ITGA2	cg08446038_ITGA2	-0.330655	2.69299e-13	3673
SKCM	LCP1	cg17771150_LCP1	-0.758203	0	3936
SKCM	MMP1	cg13759446_MMP1	0.0332712	0.472257	4312
SKCM	MMP10	cg02061229_MMP10	-0.0533001	0.24931	4319
SKCM	MMP12	cg09002726_MMP12	-0.221728	1.23764e-06	4321
SKCM	MMP13	cg10085326_MMP13	-0.193031	2.5667e-05	4322
SKCM	MMP14	cg26255831_MMP14	-0.504432	0	4323
SKCM	MMP2	cg00355286_MMP2	-0.0072711	0.875161	4313
SKCM	MMP3	cg16466334_MMP3	-0.247752	5.44646e-08	4314
SKCM	MMP9	cg00732815_MMP9	-0.228446	6.15013e-07	4318
SKCM	PECAM1	cg00427260_PECAM1	-0.510442	0	5175
SKCM	SERPINE1	cg17968347_SERPINE1	-0.364046	3.70043e-16	5054
SKCM	SPP1	cg00088885_SPP1	-0.531791	0	6696
SKCM	TIMP2	cg24331786_TIMP2	-0.419218	0	7077
SKCM	TNF	cg21467614_TNF	-0.459411	7.26757e-26	7124
SKCM	TNFRSF11B	cg07083896_TNFRSF11B	-0.0613954	0.184407	4982
STAD	FGF2	cg12632152_FGF2	-0.352849	3.28353e-12	2247
STAD	ICAM1	cg12151124_ICAM1	-0.323643	2.05885e-10	3383
STAD	ICAM3	cg05323251_ICAM3	-0.608429	0	3385
STAD	ITGA2	cg08874888_ITGA2	0.0734782	0.157197	3673
STAD	LCP1	cg04341806_LCP1	-0.59702	0	3936
STAD	MMP1	cg16575408_MMP1	-0.144586	0.00524177	4312
STAD	MMP10	cg02061229_MMP10	-0.0396325	0.445982	4319
STAD	MMP12	cg20487452_MMP12	-0.10867	0.0362039	4321
STAD	MMP13	cg10085326_MMP13	-0.182333	0.000408461	4322
STAD	MMP14	cg10418289_MMP14	-0.391522	3.57235e-15	4323
STAD	MMP2	cg04862799_MMP2	-0.0478872	0.356866	4313
STAD	MMP3	cg18113270_MMP3	-0.221598	1.6077e-05	4314
STAD	MMP9	cg26132320_MMP9	-0.0947452	0.0679661	4318
STAD	PECAM1	cg00427260_PECAM1	-0.230573	7.4482e-06	5175
STAD	SERPINE1	cg01975495_SERPINE1	-0.236044	4.45109e-06	5054
STAD	SPP1	cg00088885_SPP1	-0.0194171	0.708814	6696
STAD	TIMP2	cg13694343_TIMP2	-0.504352	0	7077
STAD	TNF	cg21370522_TNF	-0.218825	2.1599e-05	7124
STAD	TNFRSF11B	cg19620294_TNFRSF11B	-0.465279	0	4982
TGCT	FGF2	cg03941587_FGF2	-0.337272	2.7205e-05	2247
TGCT	ICAM1	cg12151124_ICAM1	-0.276668	0.000637442	3383
TGCT	ICAM3	cg14145194_ICAM3	-0.409051	2.62125e-07	3385
TGCT	ITGA2	cg08874888_ITGA2	0.572198	0	3673
TGCT	LCP1	cg17771150_LCP1	-0.712307	0	3936
TGCT	MMP1	cg14543953_MMP1	0.490153	2.74764e-10	4312
TGCT	MMP10	cg02061229_MMP10	0.110208	0.179411	4319
TGCT	MMP12	cg09002726_MMP12	-0.306408	0.000147152	4321
TGCT	MMP13	cg10085326_MMP13	0.347041	1.3564e-05	4322
TGCT	MMP14	cg05931439_MMP14	-0.589102	0	4323
TGCT	MMP2	cg08133699_MMP2	-0.438059	2.92233e-08	4313
TGCT	MMP3	cg23438592_MMP3	0.399361	4.13799e-07	4314
TGCT	MMP9	cg00732815_MMP9	-0.27184	0.000797262	4318
TGCT	PECAM1	cg20830994_PECAM1	0.350456	1.2529e-05	5175
TGCT	SERPINE1	cg02704552_SERPINE1	0.292872	0.000292294	5054
TGCT	SPP1	cg11226901_SPP1	0.511598	1.03533e-11	6696
TGCT	TIMP2	cg07382998_TIMP2	-0.346118	1.623e-05	7077
TGCT	TNF	cg10717214_TNF	-0.43659	3.28209e-08	7124
TGCT	TNFRSF11B	cg04857420_TNFRSF11B	-0.0961625	0.241458	4982
THCA	FGF2	cg24683623_FGF2	-0.375683	0	2247
THCA	ICAM1	cg10651168_ICAM1	-0.634412	0	3383
THCA	ICAM3	cg14145194_ICAM3	-0.650469	0	3385
THCA	ITGA2	cg09759260_ITGA2	0.0353372	0.428007	3673
THCA	LCP1	cg17771150_LCP1	-0.606141	0	3936
THCA	MMP1	cg14543953_MMP1	-0.0661878	0.137457	4312
THCA	MMP10	cg00347729_MMP10	0.00714265	0.87279	4319
THCA	MMP12	cg09002726_MMP12	-0.0110683	0.804042	4321
THCA	MMP13	cg19620758_MMP13	-0.231586	1.41677e-07	4322
THCA	MMP14	cg26433554_MMP14	-0.588136	0	4323
THCA	MMP2	cg14400118_MMP2	0.0736475	0.0982871	4313
THCA	MMP3	cg16466334_MMP3	-0.14712	0.000913194	4314
THCA	MMP9	cg00732815_MMP9	-0.310111	1.33201e-12	4318
THCA	PECAM1	cg02459519_PECAM1	-0.228334	2.30942e-07	5175
THCA	SERPINE1	cg16617872_SERPINE1	-0.180282	4.7389e-05	5054
THCA	SPP1	cg00088885_SPP1	-0.234951	1.00564e-07	6696
THCA	TIMP2	cg27549186_TIMP2	-0.465349	0	7077
THCA	TNF	cg21370522_TNF	-0.355987	1.55977e-16	7124
THCA	TNFRSF11B	cg17171407_TNFRSF11B	-0.52942	0	4982
THYM	FGF2	cg24683623_FGF2	-0.568831	0	2247
THYM	ICAM1	cg00500176_ICAM1	-0.604021	0	3383
THYM	ICAM3	cg14145194_ICAM3	-0.845517	0	3385
THYM	ITGA2	cg17480554_ITGA2	-0.581193	0	3673
THYM	LCP1	cg17771150_LCP1	-0.838808	0	3936
THYM	MMP1	cg16575408_MMP1	0.0539758	0.558203	4312
THYM	MMP10	cg02061229_MMP10	-0.0470285	0.610008	4319
THYM	MMP12	cg09002726_MMP12	-0.457857	1.45717e-07	4321
THYM	MMP13	cg03331229_MMP13	-0.516398	1.56829e-09	4322
THYM	MMP14	cg10418289_MMP14	-0.79675	0	4323
THYM	MMP2	cg02458945_MMP2	0.0998856	0.27772	4313
THYM	MMP3	cg23438592_MMP3	-0.502888	4.81908e-09	4314
THYM	MMP9	cg15876464_MMP9	-0.0666088	0.469249	4318
THYM	PECAM1	cg00427260_PECAM1	-0.0832627	0.365422	5175
THYM	SERPINE1	cg17968347_SERPINE1	-0.386902	1.4868e-05	5054
THYM	SPP1	cg20261167_SPP1	0.243684	0.00744659	6696
THYM	TIMP2	cg26927190_TIMP2	-0.362268	5.3783e-05	7077
THYM	TNF	cg09637172_TNF	-0.36397	4.9367e-05	7124
THYM	TNFRSF11B	cg02134720_TNFRSF11B	-0.16151	0.0780143	4982
UCEC	FGF2	cg08421768_FGF2	0.0902687	0.238684	2247
UCEC	ICAM1	cg26549174_ICAM1	-0.403572	5.3389e-08	3383
UCEC	ICAM3	cg14145194_ICAM3	-0.392358	1.30799e-07	3385
UCEC	ITGA2	cg09759260_ITGA2	0.0514902	0.502343	3673
UCEC	LCP1	cg17771150_LCP1	-0.653292	0	3936
UCEC	MMP1	cg13759446_MMP1	0.309191	4.0099e-05	4312
UCEC	MMP10	cg02061229_MMP10	0.00918357	0.904827	4319
UCEC	MMP12	cg20487452_MMP12	0.036004	0.639144	4321
UCEC	MMP13	cg19620758_MMP13	-0.111095	0.146818	4322
UCEC	MMP14	cg24698488_MMP14	-0.313834	3.0312e-05	4323
UCEC	MMP2	cg09350341_MMP2	-0.254123	0.000796465	4313
UCEC	MMP3	cg09615874_MMP3	-0.0136264	0.859183	4314
UCEC	MMP9	cg15876464_MMP9	0.104483	0.172397	4318
UCEC	PECAM1	cg02459519_PECAM1	-0.169458	0.0263692	5175
UCEC	SERPINE1	cg01975495_SERPINE1	-0.173833	0.0226832	5054
UCEC	SPP1	cg15460348_SPP1	-0.273424	0.000298925	6696
UCEC	TIMP2	cg05306745_TIMP2	-0.478611	3.73892e-11	7077
UCEC	TNF	cg20477259_TNF	0.108393	0.156824	7124
UCEC	TNFRSF11B	cg13268132_TNFRSF11B	-0.218642	0.00395787	4982
UCS	FGF2	cg17547898_FGF2	0.214156	0.109605	2247
UCS	ICAM1	cg03342114_ICAM1	-0.241703	0.0702528	3383
UCS	ICAM3	cg14145194_ICAM3	-0.33141	0.0121287	3385
UCS	ITGA2	cg05928650_ITGA2	0.0288437	0.830985	3673
UCS	LCP1	cg03627295_LCP1	-0.422932	0.00115482	3936
UCS	MMP1	cg14543953_MMP1	-0.178701	0.183045	4312
UCS	MMP10	cg02061229_MMP10	-0.180257	0.179215	4319
UCS	MMP12	cg23979520_MMP12	-0.0688403	0.610876	4321
UCS	MMP13	cg22658979_MMP13	-0.419265	0.00116943	4322
UCS	MMP14	cg18207699_MMP14	-0.527353	3.308e-05	4323
UCS	MMP2	cg07582157_MMP2	-0.0859476	0.523959	4313
UCS	MMP3	cg16466334_MMP3	-0.124822	0.354898	4314
UCS	MMP9	cg12071656_MMP9	0.0244361	0.856542	4318
UCS	PECAM1	cg20830994_PECAM1	-0.173256	0.196916	5175
UCS	SERPINE1	cg08506775_SERPINE1	-0.252269	0.0585739	5054
UCS	SPP1	cg00088885_SPP1	-0.122505	0.362973	6696
UCS	TIMP2	cg05376904_TIMP2	-0.393052	0.00266719	7077
UCS	TNF	cg15989608_TNF	0.195978	0.144007	7124
UCS	TNFRSF11B	cg13268132_TNFRSF11B	-0.114986	0.39334	4982
UVM	FGF2	cg03737475_FGF2	-0.103446	0.360431	2247
UVM	ICAM1	cg20036207_ICAM1	-0.40136	0.000252036	3383
UVM	ICAM3	cg05323251_ICAM3	-0.259587	0.0203049	3385
UVM	ITGA2	cg07737131_ITGA2	-0.0905767	0.423491	3673
UVM	LCP1	cg17771150_LCP1	-0.794304	0	3936
UVM	MMP1	cg16575408_MMP1	-0.196305	0.0809509	4312
UVM	MMP10	cg02061229_MMP10	0.00584347	0.958972	4319
UVM	MMP12	cg23979520_MMP12	-0.48956	4.05503e-06	4321
UVM	MMP13	cg19620758_MMP13	-0.26703	0.0166454	4322
UVM	MMP14	cg26433554_MMP14	-0.530825	6.29141e-07	4323
UVM	MMP2	cg04049508_MMP2	-0.214369	0.0563581	4313
UVM	MMP3	cg23438592_MMP3	-0.263846	0.0180378	4314
UVM	MMP9	cg02310296_MMP9	-0.199391	0.0762691	4318
UVM	PECAM1	cg02459519_PECAM1	-0.360173	0.00110629	5175
UVM	SERPINE1	cg17968347_SERPINE1	-0.465635	1.6971e-05	5054
UVM	SPP1	cg00088885_SPP1	-0.517323	1.30995e-06	6696
UVM	TIMP2	cg02569115_TIMP2	-0.347632	0.00167556	7077
UVM	TNF	cg09637172_TNF	-0.430659	6.6761e-05	7124
UVM	TNFRSF11B	cg17171407_TNFRSF11B	-0.347267	0.00159947	4982
