# Supplementary material for: Pan-cancer analyses of senescence-related genes in extracellular matrix characterization in cancer
Source: Discov Oncol. 2023 Nov 20;14:208. doi: 10.1007/s12672-023-00828-7 (PMC10660488; doi:10.1007/s12672-023-00828-7)
Supplement: Supplementary file 23 — Supplementary file23 (XLSX 164 KB) [file 12672_2023_828_MOESM23_ESM.xlsx]

## Sheet: SheetName
Table S18 The overall survival difference between higher and lower methylation groups in pan-cancer
cancertype	symbol	tag	sur_type	log_rank_p	cox_p	HR	higher_risk_of_death	entrez
ACC	FGF2	cg25583174	OS	0.832362	0.830444	1.0831	Higher meth.	2247
ACC	FGF2	cg25583174	PFS	0.195887	0.200896	0.678272	Lower meth.	2247
ACC	FGF2	cg25583174	DSS	0.970934	0.973249	0.987131	Lower meth.	2247
ACC	FGF2	cg25583174	DFI	0.234297	0.244603	0.481763	Lower meth.	2247
ACC	ICAM1	cg00500176	OS	0.0867247	0.0915587	1.8983	Higher meth.	3383
ACC	ICAM1	cg00500176	PFS	0.0301854	0.0329572	1.93524	Higher meth.	3383
ACC	ICAM1	cg00500176	DSS	0.0498424	0.0551629	2.15918	Higher meth.	3383
ACC	ICAM1	cg00500176	DFI	0.979955	0.979955	1.01589	Higher meth.	3383
ACC	ICAM3	cg05323251	OS	0.188455	0.191921	1.63342	Higher meth.	3385
ACC	ICAM3	cg05323251	PFS	0.0616043	0.0648489	1.76369	Higher meth.	3385
ACC	ICAM3	cg05323251	DSS	0.121173	0.12608	1.82792	Higher meth.	3385
ACC	ICAM3	cg05323251	DFI	0.623238	0.624487	1.34679	Higher meth.	3385
ACC	ITGA2	cg07737131	OS	0.0654432	0.0712178	0.493748	Lower meth.	3673
ACC	ITGA2	cg07737131	PFS	0.263096	0.265133	0.711559	Lower meth.	3673
ACC	ITGA2	cg07737131	DSS	0.050918	0.057009	0.459415	Lower meth.	3673
ACC	ITGA2	cg07737131	DFI	0.544314	0.546516	0.693357	Lower meth.	3673
ACC	LCP1	cg17771150	OS	0.00939495	0.0121382	2.65751	Higher meth.	3936
ACC	LCP1	cg17771150	PFS	0.000304685	0.00054155	3.11401	Higher meth.	3936
ACC	LCP1	cg17771150	DSS	0.00485983	0.0071598	3.04968	Higher meth.	3936
ACC	LCP1	cg17771150	DFI	0.157513	0.169042	2.35783	Higher meth.	3936
ACC	MMP1	cg16575408	OS	0.359053	0.36005	1.40841	Higher meth.	4312
ACC	MMP1	cg16575408	PFS	0.464366	0.463844	1.24814	Higher meth.	4312
ACC	MMP1	cg16575408	DSS	0.381163	0.381951	1.40385	Higher meth.	4312
ACC	MMP1	cg16575408	DFI	0.918796	0.918808	0.940105	Lower meth.	4312
ACC	MMP10	cg00347729	OS	0.16133	0.166999	0.592105	Lower meth.	4319
ACC	MMP10	cg00347729	PFS	0.000879366	0.00135377	0.356656	Lower meth.	4319
ACC	MMP10	cg00347729	DSS	0.0992696	0.105873	0.52331	Lower meth.	4319
ACC	MMP10	cg00347729	DFI	0.00251355	0.00761737	0.159504	Lower meth.	4319
ACC	MMP12	cg02368591	OS	0.657291	0.659605	1.17881	Higher meth.	4321
ACC	MMP12	cg02368591	PFS	0.593646	0.591801	1.17607	Higher meth.	4321
ACC	MMP12	cg02368591	DSS	0.475085	0.478379	1.31816	Higher meth.	4321
ACC	MMP12	cg02368591	DFI	0.719425	0.719949	0.804628	Lower meth.	4321
ACC	MMP13	cg19620758	OS	0.568371	0.567296	1.24635	Higher meth.	4322
ACC	MMP13	cg19620758	PFS	0.272647	0.275279	1.39725	Higher meth.	4322
ACC	MMP13	cg19620758	DSS	0.367229	0.368339	1.44085	Higher meth.	4322
ACC	MMP13	cg19620758	DFI	0.406973	0.411965	1.67909	Higher meth.	4322
ACC	MMP14	cg10599444	OS	0.407142	0.409085	0.734339	Lower meth.	4323
ACC	MMP14	cg10599444	PFS	0.0739749	0.0771693	0.583097	Lower meth.	4323
ACC	MMP14	cg10599444	DSS	0.36978	0.372263	0.70726	Lower meth.	4323
ACC	MMP14	cg10599444	DFI	0.149871	0.162851	0.416059	Lower meth.	4323
ACC	MMP2	cg27279620	OS	0.0105568	0.013949	2.70703	Higher meth.	4313
ACC	MMP2	cg27279620	PFS	0.00144255	0.00213649	2.69332	Higher meth.	4313
ACC	MMP2	cg27279620	DSS	0.0198282	0.0243759	2.52754	Higher meth.	4313
ACC	MMP2	cg27279620	DFI	0.0577794	0.0714396	3.12023	Higher meth.	4313
ACC	MMP3	cg18113270	OS	0.412264	0.41276	1.35896	Higher meth.	4314
ACC	MMP3	cg18113270	PFS	0.334777	0.334048	1.34061	Higher meth.	4314
ACC	MMP3	cg18113270	DSS	0.435653	0.435931	1.35348	Higher meth.	4314
ACC	MMP3	cg18113270	DFI	0.793987	0.794194	1.17149	Higher meth.	4314
ACC	MMP9	cg00732815	OS	0.619789	0.618626	1.20447	Higher meth.	4318
ACC	MMP9	cg00732815	PFS	0.692643	0.693107	1.12671	Higher meth.	4318
ACC	MMP9	cg00732815	DSS	0.564337	0.563482	1.25109	Higher meth.	4318
ACC	MMP9	cg00732815	DFI	0.995493	0.995493	1.00343	Higher meth.	4318
ACC	PECAM1	cg00879592	OS	0.0236067	0.0278555	2.3835	Higher meth.	5175
ACC	PECAM1	cg00879592	PFS	0.00935795	0.0113133	2.21655	Higher meth.	5175
ACC	PECAM1	cg00879592	DSS	0.0393639	0.0444241	2.24694	Higher meth.	5175
ACC	PECAM1	cg00879592	DFI	0.0648739	0.0787806	3.02892	Higher meth.	5175
ACC	SERPINE1	cg20438404	OS	0.299387	0.303752	0.67868	Lower meth.	5054
ACC	SERPINE1	cg20438404	PFS	0.530808	0.529719	0.826915	Lower meth.	5054
ACC	SERPINE1	cg20438404	DSS	0.315831	0.320362	0.677899	Lower meth.	5054
ACC	SERPINE1	cg20438404	DFI	0.690776	0.691466	0.785319	Lower meth.	5054
ACC	SPP1	cg00088885	OS	0.651948	0.652436	1.18348	Higher meth.	6696
ACC	SPP1	cg00088885	PFS	0.550639	0.547836	1.19995	Higher meth.	6696
ACC	SPP1	cg00088885	DSS	0.592041	0.592845	1.23043	Higher meth.	6696
ACC	SPP1	cg00088885	DFI	0.149886	0.164912	2.56584	Higher meth.	6696
ACC	TIMP2	cg05376904	OS	0.224945	0.229075	0.635111	Lower meth.	7077
ACC	TIMP2	cg05376904	PFS	0.129948	0.133716	0.634102	Lower meth.	7077
ACC	TIMP2	cg05376904	DSS	0.240595	0.244838	0.633881	Lower meth.	7077
ACC	TIMP2	cg05376904	DFI	0.516572	0.519216	0.676636	Lower meth.	7077
ACC	TNF	cg02137984	OS	0.564789	0.563969	1.24079	Higher meth.	7124
ACC	TNF	cg02137984	PFS	0.273877	0.276291	1.39439	Higher meth.	7124
ACC	TNF	cg02137984	DSS	0.511044	0.510626	1.29066	Higher meth.	7124
ACC	TNF	cg02137984	DFI	0.165913	0.178175	2.34428	Higher meth.	7124
ACC	TNFRSF11B	cg13268132	OS	0.648665	0.64922	1.18543	Higher meth.	4982
ACC	TNFRSF11B	cg13268132	PFS	0.37225	0.375358	0.764336	Lower meth.	4982
ACC	TNFRSF11B	cg13268132	DSS	0.602374	0.603185	1.22334	Higher meth.	4982
ACC	TNFRSF11B	cg13268132	DFI	0.586428	0.588096	0.720182	Lower meth.	4982
BLCA	FGF2	cg03941587	OS	0.977899	0.977281	0.995758	Lower meth.	2247
BLCA	FGF2	cg03941587	PFS	0.68446	0.683437	0.947769	Lower meth.	2247
BLCA	FGF2	cg03941587	DSS	0.499206	0.499366	0.884716	Lower meth.	2247
BLCA	FGF2	cg03941587	DFI	0.46442	0.465635	1.29682	Higher meth.	2247
BLCA	ICAM1	cg26549174	OS	0.428182	0.429793	0.888437	Lower meth.	3383
BLCA	ICAM1	cg26549174	PFS	0.436017	0.436978	0.902658	Lower meth.	3383
BLCA	ICAM1	cg26549174	DSS	0.426313	0.427399	0.865775	Lower meth.	3383
BLCA	ICAM1	cg26549174	DFI	0.426366	0.427869	1.32853	Higher meth.	3383
BLCA	ICAM3	cg14145194	OS	0.946862	0.945513	1.01028	Higher meth.	3385
BLCA	ICAM3	cg14145194	PFS	0.909807	0.908502	1.01532	Higher meth.	3385
BLCA	ICAM3	cg14145194	DSS	0.422469	0.422333	1.1566	Higher meth.	3385
BLCA	ICAM3	cg14145194	DFI	0.217439	0.221065	1.55765	Higher meth.	3385
BLCA	ITGA2	cg02741854	OS	0.291158	0.291495	1.17132	Higher meth.	3673
BLCA	ITGA2	cg02741854	PFS	0.37874	0.378956	1.1231	Higher meth.	3673
BLCA	ITGA2	cg02741854	DSS	0.235041	0.235862	1.24044	Higher meth.	3673
BLCA	ITGA2	cg02741854	DFI	0.645586	0.645942	1.17722	Higher meth.	3673
BLCA	LCP1	cg17771150	OS	0.00597584	0.00634499	1.51046	Higher meth.	3936
BLCA	LCP1	cg17771150	PFS	0.0151047	0.0155809	1.37858	Higher meth.	3936
BLCA	LCP1	cg17771150	DSS	0.010552	0.0112271	1.58878	Higher meth.	3936
BLCA	LCP1	cg17771150	DFI	0.742123	0.742265	1.12657	Higher meth.	3936
BLCA	MMP1	cg16575408	OS	0.319329	0.320221	1.16142	Higher meth.	4312
BLCA	MMP1	cg16575408	PFS	0.66352	0.664051	1.05912	Higher meth.	4312
BLCA	MMP1	cg16575408	DSS	0.35607	0.356416	1.18259	Higher meth.	4312
BLCA	MMP1	cg16575408	DFI	0.755067	0.755186	0.895155	Lower meth.	4312
BLCA	MMP10	cg02061229	OS	0.130489	0.131386	1.25407	Higher meth.	4319
BLCA	MMP10	cg02061229	PFS	0.457329	0.457688	1.10279	Higher meth.	4319
BLCA	MMP10	cg02061229	DSS	0.493115	0.493351	1.13159	Higher meth.	4319
BLCA	MMP10	cg02061229	DFI	0.268252	0.271219	0.673274	Lower meth.	4319
BLCA	MMP12	cg02368591	OS	0.00384172	0.00412809	0.64849	Lower meth.	4321
BLCA	MMP12	cg02368591	PFS	0.00422087	0.00444482	0.685619	Lower meth.	4321
BLCA	MMP12	cg02368591	DSS	0.0141644	0.0149584	0.642583	Lower meth.	4321
BLCA	MMP12	cg02368591	DFI	0.787404	0.787483	0.908231	Lower meth.	4321
BLCA	MMP13	cg10085326	OS	0.438925	0.438978	0.890893	Lower meth.	4322
BLCA	MMP13	cg10085326	PFS	0.679628	0.67974	0.94723	Lower meth.	4322
BLCA	MMP13	cg10085326	DSS	0.274104	0.274705	0.820697	Lower meth.	4322
BLCA	MMP13	cg10085326	DFI	0.90488	0.904887	1.0433	Higher meth.	4322
BLCA	MMP14	cg18207699	OS	0.486908	0.486796	0.901313	Lower meth.	4323
BLCA	MMP14	cg18207699	PFS	0.462212	0.461556	0.907513	Lower meth.	4323
BLCA	MMP14	cg18207699	DSS	0.188762	0.189479	0.788062	Lower meth.	4323
BLCA	MMP14	cg18207699	DFI	0.936462	0.936464	1.02867	Higher meth.	4323
BLCA	MMP2	cg04049508	OS	0.0570358	0.0579976	1.3309	Higher meth.	4313
BLCA	MMP2	cg04049508	PFS	0.527948	0.528566	1.08696	Higher meth.	4313
BLCA	MMP2	cg04049508	DSS	0.133261	0.134727	1.31115	Higher meth.	4313
BLCA	MMP2	cg04049508	DFI	0.408205	0.409856	0.74119	Lower meth.	4313
BLCA	MMP3	cg16466334	OS	0.106355	0.107229	0.785708	Lower meth.	4314
BLCA	MMP3	cg16466334	PFS	0.0987932	0.0995464	0.804621	Lower meth.	4314
BLCA	MMP3	cg16466334	DSS	0.230091	0.231067	0.805255	Lower meth.	4314
BLCA	MMP3	cg16466334	DFI	0.779049	0.779137	1.10594	Higher meth.	4314
BLCA	MMP9	cg00732815	OS	0.374221	0.374403	1.14192	Higher meth.	4318
BLCA	MMP9	cg00732815	PFS	0.249144	0.249854	1.16394	Higher meth.	4318
BLCA	MMP9	cg00732815	DSS	0.408509	0.408799	1.16109	Higher meth.	4318
BLCA	MMP9	cg00732815	DFI	0.846594	0.846624	0.933239	Lower meth.	4318
BLCA	PECAM1	cg00427260	OS	0.00426952	0.00456668	1.53316	Higher meth.	5175
BLCA	PECAM1	cg00427260	PFS	0.00342664	0.0036397	1.46881	Higher meth.	5175
BLCA	PECAM1	cg00427260	DSS	0.0155093	0.0163406	1.5477	Higher meth.	5175
BLCA	PECAM1	cg00427260	DFI	0.744926	0.745066	1.12442	Higher meth.	5175
BLCA	SERPINE1	cg01975495	OS	0.222831	0.224323	0.833421	Lower meth.	5054
BLCA	SERPINE1	cg01975495	PFS	0.724381	0.72545	0.954639	Lower meth.	5054
BLCA	SERPINE1	cg01975495	DSS	0.586021	0.587067	0.906391	Lower meth.	5054
BLCA	SERPINE1	cg01975495	DFI	0.0634982	0.0684973	1.98216	Higher meth.	5054
BLCA	SPP1	cg00088885	OS	0.882995	0.881476	0.978003	Lower meth.	6696
BLCA	SPP1	cg00088885	PFS	0.335414	0.335708	0.880929	Lower meth.	6696
BLCA	SPP1	cg00088885	DSS	0.989046	0.988504	0.997404	Lower meth.	6696
BLCA	SPP1	cg00088885	DFI	0.104948	0.109901	0.557427	Lower meth.	6696
BLCA	TIMP2	cg05306745	OS	0.122676	0.123823	0.794335	Lower meth.	7077
BLCA	TIMP2	cg05306745	PFS	0.0874906	0.0879769	0.798372	Lower meth.	7077
BLCA	TIMP2	cg05306745	DSS	0.283972	0.284843	0.824253	Lower meth.	7077
BLCA	TIMP2	cg05306745	DFI	0.675445	0.675724	0.862171	Lower meth.	7077
BLCA	TNF	cg01360627	OS	0.438821	0.439053	1.12258	Higher meth.	7124
BLCA	TNF	cg01360627	PFS	0.115419	0.115969	1.22987	Higher meth.	7124
BLCA	TNF	cg01360627	DSS	0.212587	0.213917	1.25355	Higher meth.	7124
BLCA	TNF	cg01360627	DFI	0.167222	0.171354	1.63267	Higher meth.	7124
BLCA	TNFRSF11B	cg26019549	OS	0.402767	0.403484	0.882185	Lower meth.	4982
BLCA	TNFRSF11B	cg26019549	PFS	0.380984	0.381131	0.890785	Lower meth.	4982
BLCA	TNFRSF11B	cg26019549	DSS	0.29771	0.298488	0.82784	Lower meth.	4982
BLCA	TNFRSF11B	cg26019549	DFI	0.406154	0.407888	1.3566	Higher meth.	4982
BRCA	FGF2	cg24683623	OS	0.26101	0.26189	0.790564	Lower meth.	2247
BRCA	FGF2	cg24683623	PFS	0.116863	0.117881	0.758702	Lower meth.	2247
BRCA	FGF2	cg24683623	DSS	0.0893319	0.091965	0.632768	Lower meth.	2247
BRCA	FGF2	cg24683623	DFI	0.106696	0.109099	0.662299	Lower meth.	2247
BRCA	ICAM1	cg26549174	OS	0.945883	0.945603	1.01426	Higher meth.	3383
BRCA	ICAM1	cg26549174	PFS	0.916917	0.917057	0.982009	Lower meth.	3383
BRCA	ICAM1	cg26549174	DSS	0.988948	0.989345	0.996434	Lower meth.	3383
BRCA	ICAM1	cg26549174	DFI	0.464126	0.464772	1.20517	Higher meth.	3383
BRCA	ICAM3	cg14145194	OS	0.06705	0.0686852	1.46755	Higher meth.	3385
BRCA	ICAM3	cg14145194	PFS	0.0717548	0.0729096	1.37301	Higher meth.	3385
BRCA	ICAM3	cg14145194	DSS	0.329485	0.330824	1.30074	Higher meth.	3385
BRCA	ICAM3	cg14145194	DFI	0.538384	0.538791	1.16976	Higher meth.	3385
BRCA	ITGA2	cg08874888	OS	0.772304	0.772096	1.06223	Higher meth.	3673
BRCA	ITGA2	cg08874888	PFS	0.508147	0.508213	1.12309	Higher meth.	3673
BRCA	ITGA2	cg08874888	DSS	0.240503	0.242315	1.3745	Higher meth.	3673
BRCA	ITGA2	cg08874888	DFI	0.139747	0.14216	1.46679	Higher meth.	3673
BRCA	LCP1	cg04341806	OS	0.0773635	0.0789944	1.44737	Higher meth.	3936
BRCA	LCP1	cg04341806	PFS	0.348471	0.348857	1.17845	Higher meth.	3936
BRCA	LCP1	cg04341806	DSS	0.0133217	0.0151928	1.98504	Higher meth.	3936
BRCA	LCP1	cg04341806	DFI	0.124488	0.126971	1.48934	Higher meth.	3936
BRCA	MMP1	cg16575408	OS	0.0131615	0.0141399	0.59569	Lower meth.	4312
BRCA	MMP1	cg16575408	PFS	0.0500229	0.0510644	0.708062	Lower meth.	4312
BRCA	MMP1	cg16575408	DSS	0.112533	0.115008	0.650823	Lower meth.	4312
BRCA	MMP1	cg16575408	DFI	0.875956	0.875964	0.960899	Lower meth.	4312
BRCA	MMP10	cg02061229	OS	0.00186408	0.00225174	0.511988	Lower meth.	4319
BRCA	MMP10	cg02061229	PFS	0.00338671	0.00375791	0.593476	Lower meth.	4319
BRCA	MMP10	cg02061229	DSS	0.00909244	0.0106771	0.486033	Lower meth.	4319
BRCA	MMP10	cg02061229	DFI	0.0204389	0.0223793	0.548226	Lower meth.	4319
BRCA	MMP12	cg09002726	OS	0.299251	0.300196	1.24103	Higher meth.	4321
BRCA	MMP12	cg09002726	PFS	0.281611	0.282326	1.20654	Higher meth.	4321
BRCA	MMP12	cg09002726	DSS	0.282341	0.284014	1.335	Higher meth.	4321
BRCA	MMP12	cg09002726	DFI	0.629705	0.629917	1.1305	Higher meth.	4321
BRCA	MMP13	cg22658979	OS	0.0158615	0.0169709	0.604174	Lower meth.	4322
BRCA	MMP13	cg22658979	PFS	0.00614837	0.00664192	0.618315	Lower meth.	4322
BRCA	MMP13	cg22658979	DSS	0.0362668	0.0387678	0.566339	Lower meth.	4322
BRCA	MMP13	cg22658979	DFI	0.00872908	0.0100337	0.509536	Lower meth.	4322
BRCA	MMP14	cg18207699	OS	0.266865	0.267887	0.792917	Lower meth.	4323
BRCA	MMP14	cg18207699	PFS	0.148726	0.149802	0.773039	Lower meth.	4323
BRCA	MMP14	cg18207699	DSS	0.515484	0.515983	0.839491	Lower meth.	4323
BRCA	MMP14	cg18207699	DFI	0.0920579	0.094517	0.650107	Lower meth.	4323
BRCA	MMP2	cg05782444	OS	0.734427	0.734208	0.931715	Lower meth.	4313
BRCA	MMP2	cg05782444	PFS	0.977242	0.977503	1.00494	Higher meth.	4313
BRCA	MMP2	cg05782444	DSS	0.63665	0.636527	0.881116	Lower meth.	4313
BRCA	MMP2	cg05782444	DFI	0.382519	0.383501	1.25046	Higher meth.	4313
BRCA	MMP3	cg17145397	OS	0.582794	0.582765	0.892089	Lower meth.	4314
BRCA	MMP3	cg17145397	PFS	0.28582	0.286376	0.829558	Lower meth.	4314
BRCA	MMP3	cg17145397	DSS	0.247684	0.249394	0.73198	Lower meth.	4314
BRCA	MMP3	cg17145397	DFI	0.132885	0.135255	0.68009	Lower meth.	4314
BRCA	MMP9	cg02310296	OS	0.0763062	0.0779495	1.45122	Higher meth.	4318
BRCA	MMP9	cg02310296	PFS	0.258107	0.258755	1.21822	Higher meth.	4318
BRCA	MMP9	cg02310296	DSS	0.356153	0.357117	1.28032	Higher meth.	4318
BRCA	MMP9	cg02310296	DFI	0.422709	0.423506	1.22628	Higher meth.	4318
BRCA	PECAM1	cg00427260	OS	0.889322	0.889324	1.02939	Higher meth.	5175
BRCA	PECAM1	cg00427260	PFS	0.746286	0.746222	1.05825	Higher meth.	5175
BRCA	PECAM1	cg00427260	DSS	0.806456	0.806513	0.936411	Lower meth.	5175
BRCA	PECAM1	cg00427260	DFI	0.617384	0.617618	1.1356	Higher meth.	5175
BRCA	SERPINE1	cg16617872	OS	0.0417537	0.0432585	1.53252	Higher meth.	5054
BRCA	SERPINE1	cg16617872	PFS	0.0616998	0.0628262	1.38701	Higher meth.	5054
BRCA	SERPINE1	cg16617872	DSS	0.0259754	0.0282568	1.83768	Higher meth.	5054
BRCA	SERPINE1	cg16617872	DFI	0.831236	0.831256	1.05567	Higher meth.	5054
BRCA	SPP1	cg20261167	OS	0.355086	0.355828	0.824606	Lower meth.	6696
BRCA	SPP1	cg20261167	PFS	0.964565	0.964563	1.00778	Higher meth.	6696
BRCA	SPP1	cg20261167	DSS	0.473549	0.474252	0.825015	Lower meth.	6696
BRCA	SPP1	cg20261167	DFI	0.569417	0.569753	1.15642	Higher meth.	6696
BRCA	TIMP2	cg19295840	OS	0.776316	0.776648	1.06135	Higher meth.	7077
BRCA	TIMP2	cg19295840	PFS	0.735705	0.736108	1.06099	Higher meth.	7077
BRCA	TIMP2	cg19295840	DSS	0.264383	0.265982	0.740199	Lower meth.	7077
BRCA	TIMP2	cg19295840	DFI	0.939203	0.939204	1.01961	Higher meth.	7077
BRCA	TNF	cg01360627	OS	0.144362	0.145903	1.36	Higher meth.	7124
BRCA	TNF	cg01360627	PFS	0.103659	0.104799	1.33391	Higher meth.	7124
BRCA	TNF	cg01360627	DSS	0.385659	0.386714	1.26482	Higher meth.	7124
BRCA	TNF	cg01360627	DFI	0.124444	0.126881	1.48652	Higher meth.	7124
BRCA	TNFRSF11B	cg12545993	OS	0.388925	0.389591	1.19768	Higher meth.	4982
BRCA	TNFRSF11B	cg12545993	PFS	0.342144	0.342721	1.18084	Higher meth.	4982
BRCA	TNFRSF11B	cg12545993	DSS	0.586395	0.586764	1.15752	Higher meth.	4982
BRCA	TNFRSF11B	cg12545993	DFI	0.424025	0.424825	1.22596	Higher meth.	4982
CESC	FGF2	cg24683623	OS	0.512565	0.512744	1.16752	Higher meth.	2247
CESC	FGF2	cg24683623	PFS	0.956179	0.95619	1.01185	Higher meth.	2247
CESC	FGF2	cg24683623	DSS	0.588185	0.588152	1.15937	Higher meth.	2247
CESC	FGF2	cg24683623	DFI	0.721352	0.721609	0.869338	Lower meth.	2247
CESC	ICAM1	cg26549174	OS	0.508893	0.509968	1.16838	Higher meth.	3383
CESC	ICAM1	cg26549174	PFS	0.306337	0.307602	1.24557	Higher meth.	3383
CESC	ICAM1	cg26549174	DSS	0.182419	0.184908	1.44391	Higher meth.	3383
CESC	ICAM1	cg26549174	DFI	0.0940703	0.100245	1.97084	Higher meth.	3383
CESC	ICAM3	cg14145194	OS	0.132626	0.134868	1.43012	Higher meth.	3385
CESC	ICAM3	cg14145194	PFS	0.0930834	0.0950036	1.43492	Higher meth.	3385
CESC	ICAM3	cg14145194	DSS	0.106825	0.109628	1.56377	Higher meth.	3385
CESC	ICAM3	cg14145194	DFI	0.0141433	0.0188917	2.82455	Higher meth.	3385
CESC	ITGA2	cg07737131	OS	0.767218	0.767287	0.932398	Lower meth.	3673
CESC	ITGA2	cg07737131	PFS	0.956529	0.956447	0.988329	Lower meth.	3673
CESC	ITGA2	cg07737131	DSS	0.419125	0.420101	0.801663	Lower meth.	3673
CESC	ITGA2	cg07737131	DFI	0.539716	0.540819	0.783727	Lower meth.	3673
CESC	LCP1	cg04341806	OS	0.631664	0.632505	1.11943	Higher meth.	3936
CESC	LCP1	cg04341806	PFS	0.229718	0.231403	1.29375	Higher meth.	3936
CESC	LCP1	cg04341806	DSS	0.631533	0.631786	1.13947	Higher meth.	3936
CESC	LCP1	cg04341806	DFI	0.113119	0.119146	1.87571	Higher meth.	3936
CESC	MMP1	cg13759446	OS	0.512498	0.512392	0.854879	Lower meth.	4312
CESC	MMP1	cg13759446	PFS	0.372863	0.373413	0.823667	Lower meth.	4312
CESC	MMP1	cg13759446	DSS	0.81813	0.818183	0.939227	Lower meth.	4312
CESC	MMP1	cg13759446	DFI	0.54121	0.541513	1.27434	Higher meth.	4312
CESC	MMP10	cg02061229	OS	0.656356	0.655415	0.89981	Lower meth.	4319
CESC	MMP10	cg02061229	PFS	0.500118	0.50007	0.86499	Lower meth.	4319
CESC	MMP10	cg02061229	DSS	0.905432	0.904963	0.967946	Lower meth.	4319
CESC	MMP10	cg02061229	DFI	0.717975	0.719145	0.868288	Lower meth.	4319
CESC	MMP12	cg20487452	OS	0.942593	0.943405	1.01695	Higher meth.	4321
CESC	MMP12	cg20487452	PFS	0.715939	0.715549	0.924531	Lower meth.	4321
CESC	MMP12	cg20487452	DSS	0.841538	0.841572	0.946915	Lower meth.	4321
CESC	MMP12	cg20487452	DFI	0.635868	0.635599	1.20728	Higher meth.	4321
CESC	MMP13	cg19710916	OS	0.44968	0.449773	0.835347	Lower meth.	4322
CESC	MMP13	cg19710916	PFS	0.856871	0.857348	1.03943	Higher meth.	4322
CESC	MMP13	cg19710916	DSS	0.343712	0.345078	0.771895	Lower meth.	4322
CESC	MMP13	cg19710916	DFI	0.126773	0.132679	1.85916	Higher meth.	4322
CESC	MMP14	cg26255831	OS	0.139401	0.141675	1.42268	Higher meth.	4323
CESC	MMP14	cg26255831	PFS	0.0167217	0.0179693	1.68232	Higher meth.	4323
CESC	MMP14	cg26255831	DSS	0.115069	0.117918	1.54491	Higher meth.	4323
CESC	MMP14	cg26255831	DFI	0.0591857	0.0652448	2.1458	Higher meth.	4323
CESC	MMP2	cg04049508	OS	0.116525	0.118452	0.689456	Lower meth.	4313
CESC	MMP2	cg04049508	PFS	0.0237903	0.0251443	0.613926	Lower meth.	4313
CESC	MMP2	cg04049508	DSS	0.286428	0.288149	0.747483	Lower meth.	4313
CESC	MMP2	cg04049508	DFI	0.13136	0.137038	0.55393	Lower meth.	4313
CESC	MMP3	cg16466334	OS	0.0021709	0.0027193	0.475355	Lower meth.	4314
CESC	MMP3	cg16466334	PFS	0.0294173	0.0309096	0.623399	Lower meth.	4314
CESC	MMP3	cg16466334	DSS	0.00524808	0.00644282	0.463408	Lower meth.	4314
CESC	MMP3	cg16466334	DFI	0.845191	0.846071	0.925818	Lower meth.	4314
CESC	MMP9	cg26132320	OS	0.488133	0.488349	1.17772	Higher meth.	4318
CESC	MMP9	cg26132320	PFS	0.502649	0.502719	1.15467	Higher meth.	4318
CESC	MMP9	cg26132320	DSS	0.535757	0.535865	1.18375	Higher meth.	4318
CESC	MMP9	cg26132320	DFI	0.369701	0.371546	1.42133	Higher meth.	4318
CESC	PECAM1	cg00427260	OS	0.139047	0.141168	1.42023	Higher meth.	5175
CESC	PECAM1	cg00427260	PFS	0.125934	0.127759	1.39124	Higher meth.	5175
CESC	PECAM1	cg00427260	DSS	0.200808	0.202894	1.41843	Higher meth.	5175
CESC	PECAM1	cg00427260	DFI	0.243321	0.247046	1.58411	Higher meth.	5175
CESC	SERPINE1	cg15874872	OS	0.13418	0.13617	1.42859	Higher meth.	5054
CESC	SERPINE1	cg15874872	PFS	0.0467018	0.048444	1.54028	Higher meth.	5054
CESC	SERPINE1	cg15874872	DSS	0.141071	0.143662	1.49946	Higher meth.	5054
CESC	SERPINE1	cg15874872	DFI	0.147504	0.153177	1.77915	Higher meth.	5054
CESC	SPP1	cg00088885	OS	0.935204	0.934862	1.01955	Higher meth.	6696
CESC	SPP1	cg00088885	PFS	0.32066	0.321412	1.23855	Higher meth.	6696
CESC	SPP1	cg00088885	DSS	0.936338	0.935882	1.0222	Higher meth.	6696
CESC	SPP1	cg00088885	DFI	0.00376231	0.00657802	3.56968	Higher meth.	6696
CESC	TIMP2	cg05306745	OS	0.929031	0.929739	0.979307	Lower meth.	7077
CESC	TIMP2	cg05306745	PFS	0.853551	0.853916	0.961137	Lower meth.	7077
CESC	TIMP2	cg05306745	DSS	0.718629	0.718771	0.90625	Lower meth.	7077
CESC	TIMP2	cg05306745	DFI	0.203735	0.20817	0.600217	Lower meth.	7077
CESC	TNF	cg06825478	OS	0.276615	0.278623	1.29448	Higher meth.	7124
CESC	TNF	cg06825478	PFS	0.142569	0.144426	1.37441	Higher meth.	7124
CESC	TNF	cg06825478	DSS	0.35176	0.35339	1.29007	Higher meth.	7124
CESC	TNF	cg06825478	DFI	0.110524	0.116551	1.9135	Higher meth.	7124
CESC	TNFRSF11B	cg04857420	OS	0.758128	0.759221	0.929604	Lower meth.	4982
CESC	TNFRSF11B	cg04857420	PFS	0.217716	0.219238	0.767348	Lower meth.	4982
CESC	TNFRSF11B	cg04857420	DSS	0.457919	0.459054	0.81653	Lower meth.	4982
CESC	TNFRSF11B	cg04857420	DFI	0.103852	0.109574	0.522188	Lower meth.	4982
CHOL	FGF2	cg21550024	OS	0.446953	0.449557	1.4525	Higher meth.	2247
CHOL	FGF2	cg21550024	PFS	0.0221602	0.0276577	2.67398	Higher meth.	2247
CHOL	FGF2	cg21550024	DSS	0.437905	0.441022	1.50198	Higher meth.	2247
CHOL	FGF2	cg21550024	DFI	0.0709085	0.0855588	3.06393	Higher meth.	2247
CHOL	ICAM1	cg10651168	OS	0.0945374	0.103658	0.429576	Lower meth.	3383
CHOL	ICAM1	cg10651168	PFS	0.0268238	0.0326535	0.384563	Lower meth.	3383
CHOL	ICAM1	cg10651168	DSS	0.196973	0.204967	0.504918	Lower meth.	3383
CHOL	ICAM1	cg10651168	DFI	0.273023	0.282496	0.498551	Lower meth.	3383
CHOL	ICAM3	cg05323251	OS	0.884896	0.884918	1.07154	Higher meth.	3385
CHOL	ICAM3	cg05323251	PFS	0.0915011	0.0985976	2.09827	Higher meth.	3385
CHOL	ICAM3	cg05323251	DSS	0.532562	0.534279	1.38097	Higher meth.	3385
CHOL	ICAM3	cg05323251	DFI	0.188329	0.200149	2.28609	Higher meth.	3385
CHOL	ITGA2	cg08446038	OS	0.148095	0.155937	0.488898	Lower meth.	3673
CHOL	ITGA2	cg08446038	PFS	0.291364	0.295257	0.63613	Lower meth.	3673
CHOL	ITGA2	cg08446038	DSS	0.117762	0.12721	0.439115	Lower meth.	3673
CHOL	ITGA2	cg08446038	DFI	0.0633645	0.0779175	0.317453	Lower meth.	3673
CHOL	LCP1	cg17771150	OS	0.7205	0.720818	1.18512	Higher meth.	3936
CHOL	LCP1	cg17771150	PFS	0.271494	0.275805	1.61371	Higher meth.	3936
CHOL	LCP1	cg17771150	DSS	0.388064	0.391882	1.55765	Higher meth.	3936
CHOL	LCP1	cg17771150	DFI	0.0404565	0.0553495	3.96048	Higher meth.	3936
CHOL	MMP1	cg13759446	OS	0.654903	0.655487	0.809572	Lower meth.	4312
CHOL	MMP1	cg13759446	PFS	0.946087	0.946089	0.971474	Lower meth.	4312
CHOL	MMP1	cg13759446	DSS	0.987236	0.987236	1.00812	Higher meth.	4312
CHOL	MMP1	cg13759446	DFI	0.452438	0.457291	0.597458	Lower meth.	4312
CHOL	MMP10	cg02061229	OS	0.829049	0.829122	0.902497	Lower meth.	4319
CHOL	MMP10	cg02061229	PFS	0.261305	0.265762	0.613216	Lower meth.	4319
CHOL	MMP10	cg02061229	DSS	0.76909	0.769292	0.862276	Lower meth.	4319
CHOL	MMP10	cg02061229	DFI	0.649679	0.650824	0.745595	Lower meth.	4319
CHOL	MMP12	cg20487452	OS	0.895638	0.895656	0.938137	Lower meth.	4321
CHOL	MMP12	cg20487452	PFS	0.603533	0.604267	0.800495	Lower meth.	4321
CHOL	MMP12	cg20487452	DSS	0.851457	0.851514	0.907485	Lower meth.	4321
CHOL	MMP12	cg20487452	DFI	0.332343	0.3396	0.545867	Lower meth.	4321
CHOL	MMP13	cg22658979	OS	0.303134	0.308008	0.601801	Lower meth.	4322
CHOL	MMP13	cg22658979	PFS	0.566005	0.566965	0.782037	Lower meth.	4322
CHOL	MMP13	cg22658979	DSS	0.257906	0.264487	0.551873	Lower meth.	4322
CHOL	MMP13	cg22658979	DFI	0.427283	0.43216	0.601473	Lower meth.	4322
CHOL	MMP14	cg10418289	OS	0.714477	0.714805	0.840721	Lower meth.	4323
CHOL	MMP14	cg10418289	PFS	0.926697	0.926701	0.96135	Lower meth.	4323
CHOL	MMP14	cg10418289	DSS	0.672871	0.673428	0.808865	Lower meth.	4323
CHOL	MMP14	cg10418289	DFI	0.757898	0.75826	0.822281	Lower meth.	4323
CHOL	MMP2	cg12317456	OS	0.830473	0.830542	0.903456	Lower meth.	4313
CHOL	MMP2	cg12317456	PFS	0.790389	0.790496	1.12077	Higher meth.	4313
CHOL	MMP2	cg12317456	DSS	0.795375	0.795514	1.14052	Higher meth.	4313
CHOL	MMP2	cg12317456	DFI	0.573053	0.574997	1.43138	Higher meth.	4313
CHOL	MMP3	cg09615874	OS	0.360244	0.364276	1.57742	Higher meth.	4314
CHOL	MMP3	cg09615874	PFS	0.0472965	0.0539382	2.37392	Higher meth.	4314
CHOL	MMP3	cg09615874	DSS	0.143721	0.154923	2.27964	Higher meth.	4314
CHOL	MMP3	cg09615874	DFI	0.0374956	0.050432	3.61789	Higher meth.	4314
CHOL	MMP9	cg00732815	OS	0.161844	0.169827	0.492429	Lower meth.	4318
CHOL	MMP9	cg00732815	PFS	0.840898	0.840946	0.91752	Lower meth.	4318
CHOL	MMP9	cg00732815	DSS	0.119456	0.12951	0.429897	Lower meth.	4318
CHOL	MMP9	cg00732815	DFI	0.147752	0.167772	0.334605	Lower meth.	4318
CHOL	PECAM1	cg00427260	OS	0.833925	0.833996	1.1093	Higher meth.	5175
CHOL	PECAM1	cg00427260	PFS	0.202229	0.207592	1.74164	Higher meth.	5175
CHOL	PECAM1	cg00427260	DSS	0.782304	0.782487	1.15747	Higher meth.	5175
CHOL	PECAM1	cg00427260	DFI	0.424203	0.429128	1.67848	Higher meth.	5175
CHOL	SERPINE1	cg02273392	OS	0.062415	0.0716623	0.398934	Lower meth.	5054
CHOL	SERPINE1	cg02273392	PFS	0.0509826	0.0573912	0.433505	Lower meth.	5054
CHOL	SERPINE1	cg02273392	DSS	0.148043	0.157324	0.472827	Lower meth.	5054
CHOL	SERPINE1	cg02273392	DFI	0.067065	0.0815194	0.320886	Lower meth.	5054
CHOL	SPP1	cg15460348	OS	0.477683	0.479836	0.703775	Lower meth.	6696
CHOL	SPP1	cg15460348	PFS	0.199748	0.205587	0.56976	Lower meth.	6696
CHOL	SPP1	cg15460348	DSS	0.411085	0.414567	0.647925	Lower meth.	6696
CHOL	SPP1	cg15460348	DFI	0.245169	0.257094	0.45684	Lower meth.	6696
CHOL	TIMP2	cg11342615	OS	0.519506	0.521192	0.726948	Lower meth.	7077
CHOL	TIMP2	cg11342615	PFS	0.25465	0.259287	0.611449	Lower meth.	7077
CHOL	TIMP2	cg11342615	DSS	0.234567	0.242262	0.523385	Lower meth.	7077
CHOL	TIMP2	cg11342615	DFI	0.291627	0.300062	0.516887	Lower meth.	7077
CHOL	TNF	cg01360627	OS	0.535956	0.537439	1.34908	Higher meth.	7124
CHOL	TNF	cg01360627	PFS	0.0668032	0.0737499	2.26257	Higher meth.	7124
CHOL	TNF	cg01360627	DSS	0.481177	0.483518	1.4385	Higher meth.	7124
CHOL	TNF	cg01360627	DFI	0.274315	0.284529	2.05311	Higher meth.	7124
CHOL	TNFRSF11B	cg04857420	OS	0.60831	0.609194	0.776553	Lower meth.	4982
CHOL	TNFRSF11B	cg04857420	PFS	0.608069	0.608773	0.803399	Lower meth.	4982
CHOL	TNFRSF11B	cg04857420	DSS	0.569716	0.571045	0.742006	Lower meth.	4982
CHOL	TNFRSF11B	cg04857420	DFI	0.139536	0.153178	0.393509	Lower meth.	4982
COAD	FGF2	cg09108314	OS	0.365543	0.366276	0.803892	Lower meth.	2247
COAD	FGF2	cg09108314	PFS	0.314662	0.315639	0.820926	Lower meth.	2247
COAD	FGF2	cg09108314	DSS	0.741136	0.740738	0.894046	Lower meth.	2247
COAD	FGF2	cg09108314	DFI	0.687927	0.68838	1.2174	Higher meth.	2247
COAD	ICAM1	cg00500176	OS	0.350595	0.3514	1.25449	Higher meth.	3383
COAD	ICAM1	cg00500176	PFS	0.322734	0.322893	1.21545	Higher meth.	3383
COAD	ICAM1	cg00500176	DSS	0.712982	0.712619	1.13295	Higher meth.	3383
COAD	ICAM1	cg00500176	DFI	0.0651889	0.0754125	2.58539	Higher meth.	3383
COAD	ICAM3	cg14145194	OS	0.193821	0.195703	1.37777	Higher meth.	3385
COAD	ICAM3	cg14145194	PFS	0.221799	0.222465	1.27504	Higher meth.	3385
COAD	ICAM3	cg14145194	DSS	0.931972	0.932036	0.971471	Lower meth.	3385
COAD	ICAM3	cg14145194	DFI	0.00241587	0.0093016	7.09683	Higher meth.	3385
COAD	ITGA2	cg17480554	OS	0.303575	0.305019	0.779616	Lower meth.	3673
COAD	ITGA2	cg17480554	PFS	0.398906	0.400247	0.847269	Lower meth.	3673
COAD	ITGA2	cg17480554	DSS	0.0260844	0.0301143	0.451703	Lower meth.	3673
COAD	ITGA2	cg17480554	DFI	0.800562	0.800683	0.884164	Lower meth.	3673
COAD	LCP1	cg04341806	OS	0.708455	0.708568	0.91276	Lower meth.	3936
COAD	LCP1	cg04341806	PFS	0.456251	0.457056	0.863256	Lower meth.	3936
COAD	LCP1	cg04341806	DSS	0.937055	0.937085	0.973358	Lower meth.	3936
COAD	LCP1	cg04341806	DFI	0.272411	0.278318	1.73917	Higher meth.	3936
COAD	MMP1	cg14543953	OS	0.688337	0.688798	1.10194	Higher meth.	4312
COAD	MMP1	cg14543953	PFS	0.189239	0.190612	1.29512	Higher meth.	4312
COAD	MMP1	cg14543953	DSS	0.188437	0.192386	1.57364	Higher meth.	4312
COAD	MMP1	cg14543953	DFI	0.366915	0.370986	0.634431	Lower meth.	4312
COAD	MMP10	cg02061229	OS	0.574397	0.575019	1.14555	Higher meth.	4319
COAD	MMP10	cg02061229	PFS	0.939225	0.939662	1.01499	Higher meth.	4319
COAD	MMP10	cg02061229	DSS	0.926791	0.926221	0.96888	Lower meth.	4319
COAD	MMP10	cg02061229	DFI	0.542614	0.54419	0.734473	Lower meth.	4319
COAD	MMP12	cg09002726	OS	0.0954914	0.0976929	1.49954	Higher meth.	4321
COAD	MMP12	cg09002726	PFS	0.286605	0.287534	1.23379	Higher meth.	4321
COAD	MMP12	cg09002726	DSS	0.067526	0.0720479	1.88357	Higher meth.	4321
COAD	MMP12	cg09002726	DFI	0.730931	0.731227	0.842028	Lower meth.	4321
COAD	MMP13	cg03331229	OS	0.945232	0.945244	0.983555	Lower meth.	4322
COAD	MMP13	cg03331229	PFS	0.628242	0.628594	1.09964	Higher meth.	4322
COAD	MMP13	cg03331229	DSS	0.748553	0.7487	1.11484	Higher meth.	4322
COAD	MMP13	cg03331229	DFI	0.642627	0.643377	0.789637	Lower meth.	4322
COAD	MMP14	cg26433554	OS	0.848359	0.848734	0.954837	Lower meth.	4323
COAD	MMP14	cg26433554	PFS	0.816064	0.816	0.955186	Lower meth.	4323
COAD	MMP14	cg26433554	DSS	0.406817	0.408801	0.754839	Lower meth.	4323
COAD	MMP14	cg26433554	DFI	0.611675	0.612554	1.281	Higher meth.	4323
COAD	MMP2	cg00355286	OS	0.529676	0.530383	1.16376	Higher meth.	4313
COAD	MMP2	cg00355286	PFS	0.517563	0.518117	1.13553	Higher meth.	4313
COAD	MMP2	cg00355286	DSS	0.22936	0.23296	1.51042	Higher meth.	4313
COAD	MMP2	cg00355286	DFI	0.310764	0.315666	0.609608	Lower meth.	4313
COAD	MMP3	cg16466334	OS	0.238204	0.239785	0.752198	Lower meth.	4314
COAD	MMP3	cg16466334	PFS	0.0561339	0.0574484	0.686496	Lower meth.	4314
COAD	MMP3	cg16466334	DSS	0.255377	0.258355	0.678944	Lower meth.	4314
COAD	MMP3	cg16466334	DFI	0.636684	0.637471	1.27209	Higher meth.	4314
COAD	MMP9	cg26132320	OS	0.976242	0.976614	0.992919	Lower meth.	4318
COAD	MMP9	cg26132320	PFS	0.944025	0.9437	1.01403	Higher meth.	4318
COAD	MMP9	cg26132320	DSS	0.238685	0.242148	0.666075	Lower meth.	4318
COAD	MMP9	cg26132320	DFI	0.501642	0.503531	1.39335	Higher meth.	4318
COAD	PECAM1	cg00427260	OS	0.158788	0.160829	1.40851	Higher meth.	5175
COAD	PECAM1	cg00427260	PFS	0.658295	0.657973	1.091	Higher meth.	5175
COAD	PECAM1	cg00427260	DSS	0.516026	0.516884	1.24547	Higher meth.	5175
COAD	PECAM1	cg00427260	DFI	0.582879	0.583979	1.30558	Higher meth.	5175
COAD	SERPINE1	cg01975495	OS	0.443119	0.443512	1.20705	Higher meth.	5054
COAD	SERPINE1	cg01975495	PFS	0.531963	0.531786	1.13215	Higher meth.	5054
COAD	SERPINE1	cg01975495	DSS	0.870063	0.870706	0.946146	Lower meth.	5054
COAD	SERPINE1	cg01975495	DFI	0.0466911	0.0579157	2.96901	Higher meth.	5054
COAD	SPP1	cg20261167	OS	0.269356	0.270591	0.763163	Lower meth.	6696
COAD	SPP1	cg20261167	PFS	0.901468	0.901292	0.975825	Lower meth.	6696
COAD	SPP1	cg20261167	DSS	0.415117	0.416198	0.755891	Lower meth.	6696
COAD	SPP1	cg20261167	DFI	0.358638	0.362405	1.58301	Higher meth.	6696
COAD	TIMP2	cg13694343	OS	0.617596	0.61782	0.883709	Lower meth.	7077
COAD	TIMP2	cg13694343	PFS	0.873393	0.874494	0.968889	Lower meth.	7077
COAD	TIMP2	cg13694343	DSS	0.288099	0.290581	0.693182	Lower meth.	7077
COAD	TIMP2	cg13694343	DFI	0.190467	0.198875	1.99339	Higher meth.	7077
COAD	TNF	cg09637172	OS	0.0922791	0.0946119	1.51726	Higher meth.	7124
COAD	TNF	cg09637172	PFS	0.108126	0.109445	1.37661	Higher meth.	7124
COAD	TNF	cg09637172	DSS	0.338568	0.340709	1.38584	Higher meth.	7124
COAD	TNF	cg09637172	DFI	0.362151	0.366031	1.56477	Higher meth.	7124
COAD	TNFRSF11B	cg17171407	OS	0.188078	0.189977	1.37714	Higher meth.	4982
COAD	TNFRSF11B	cg17171407	PFS	0.10774	0.108947	1.37296	Higher meth.	4982
COAD	TNFRSF11B	cg17171407	DSS	0.560022	0.56069	1.21863	Higher meth.	4982
COAD	TNFRSF11B	cg17171407	DFI	0.0706603	0.0800364	2.4414	Higher meth.	4982
DLBC	FGF2	cg14887335	OS	0.845749	0.845868	0.871328	Lower meth.	2247
DLBC	FGF2	cg14887335	PFS	0.971984	0.971984	1.01851	Higher meth.	2247
DLBC	FGF2	cg14887335	DSS	0.421283	0.436649	2.45667	Higher meth.	2247
DLBC	FGF2	cg14887335	DFI	0.235046	0.999357	9.30039e+08	Higher meth.	2247
DLBC	ICAM1	cg02776148	OS	0.546402	0.549555	1.54957	Higher meth.	3383
DLBC	ICAM1	cg02776148	PFS	0.946054	0.946056	1.036	Higher meth.	3383
DLBC	ICAM1	cg02776148	DSS	0.308724	0.333543	3.05615	Higher meth.	3383
DLBC	ICAM1	cg02776148	DFI	0.944006	0.944022	1.09156	Higher meth.	3383
DLBC	ICAM3	cg14145194	OS	0.401864	0.408896	0.546384	Lower meth.	3385
DLBC	ICAM3	cg14145194	PFS	0.122468	0.132761	0.434881	Lower meth.	3385
DLBC	ICAM3	cg14145194	DSS	0.225688	0.258354	0.270537	Lower meth.	3385
DLBC	ICAM3	cg14145194	DFI	0.27275	0.300829	0.272718	Lower meth.	3385
DLBC	ITGA2	cg08446038	OS	0.264074	0.279185	2.4406	Higher meth.	3673
DLBC	ITGA2	cg08446038	PFS	0.470367	0.473076	1.49449	Higher meth.	3673
DLBC	ITGA2	cg08446038	DSS	0.355616	0.376261	2.77858	Higher meth.	3673
DLBC	ITGA2	cg08446038	DFI	0.293725	0.999407	8.53632e+08	Higher meth.	3673
DLBC	LCP1	cg07880943	OS	0.651645	0.653047	0.716307	Lower meth.	3936
DLBC	LCP1	cg07880943	PFS	0.929783	0.929789	1.04754	Higher meth.	3936
DLBC	LCP1	cg07880943	DSS	0.389318	0.407034	2.61011	Higher meth.	3936
DLBC	LCP1	cg07880943	DFI	0.41621	0.430854	2.73902	Higher meth.	3936
DLBC	MMP1	cg25320665	OS	0.727583	0.728205	1.28538	Higher meth.	4312
DLBC	MMP1	cg25320665	PFS	0.762062	0.762284	1.17323	Higher meth.	4312
DLBC	MMP1	cg25320665	DSS	0.349929	0.370941	2.81454	Higher meth.	4312
DLBC	MMP1	cg25320665	DFI	0.245404	0.277313	3.87278	Higher meth.	4312
DLBC	MMP10	cg02061229	OS	0.990893	0.990893	1.00833	Higher meth.	4319
DLBC	MMP10	cg02061229	PFS	0.627874	0.628796	0.766176	Lower meth.	4319
DLBC	MMP10	cg02061229	DSS	0.818098	0.818489	0.794834	Lower meth.	4319
DLBC	MMP10	cg02061229	DFI	0.622181	0.626692	2.12132	Higher meth.	4319
DLBC	MMP12	cg14948108	OS	0.919913	0.91993	0.931175	Lower meth.	4321
DLBC	MMP12	cg14948108	PFS	0.859209	0.859258	1.09632	Higher meth.	4321
DLBC	MMP12	cg14948108	DSS	0.881308	0.881416	1.16148	Higher meth.	4321
DLBC	MMP12	cg14948108	DFI	0.58423	0.590942	1.93178	Higher meth.	4321
DLBC	MMP13	cg03331229	OS	0.445735	0.451268	0.574363	Lower meth.	4322
DLBC	MMP13	cg03331229	PFS	0.17744	0.186762	0.483797	Lower meth.	4322
DLBC	MMP13	cg03331229	DSS	0.705165	0.706731	0.682303	Lower meth.	4322
DLBC	MMP13	cg03331229	DFI	0.543176	0.551981	0.482549	Lower meth.	4322
DLBC	MMP14	cg10006956	OS	0.502811	0.506927	0.615097	Lower meth.	4323
DLBC	MMP14	cg10006956	PFS	0.89199	0.892012	0.931464	Lower meth.	4323
DLBC	MMP14	cg10006956	DSS	0.297619	0.323429	0.319419	Lower meth.	4323
DLBC	MMP14	cg10006956	DFI	0.995671	0.995671	0.993304	Lower meth.	4323
DLBC	MMP2	cg00355286	OS	0.0734624	0.0955432	0.250619	Lower meth.	4313
DLBC	MMP2	cg00355286	PFS	0.221015	0.228253	0.521805	Lower meth.	4313
DLBC	MMP2	cg00355286	DSS	0.0840521	0.120274	0.149998	Lower meth.	4313
DLBC	MMP2	cg00355286	DFI	0.944006	0.944022	1.09156	Higher meth.	4313
DLBC	MMP3	cg09615874	OS	0.533489	0.53681	1.5779	Higher meth.	4314
DLBC	MMP3	cg09615874	PFS	0.925666	0.925673	0.952177	Lower meth.	4314
DLBC	MMP3	cg09615874	DSS	0.475384	0.486662	2.25292	Higher meth.	4314
DLBC	MMP3	cg09615874	DFI	0.944006	0.944022	0.91612	Lower meth.	4314
DLBC	MMP9	cg23303369	OS	0.83828	0.838416	1.15556	Higher meth.	4318
DLBC	MMP9	cg23303369	PFS	0.573149	0.574528	0.743197	Lower meth.	4318
DLBC	MMP9	cg23303369	DSS	0.262915	0.291762	3.39157	Higher meth.	4318
DLBC	MMP9	cg23303369	DFI	0.502026	0.513183	0.448018	Lower meth.	4318
DLBC	PECAM1	cg00427260	OS	0.788253	0.788539	0.822932	Lower meth.	5175
DLBC	PECAM1	cg00427260	PFS	0.26001	0.266004	0.544646	Lower meth.	5175
DLBC	PECAM1	cg00427260	DSS	0.955019	0.955025	0.944886	Lower meth.	5175
DLBC	PECAM1	cg00427260	DFI	0.27275	0.300829	0.272718	Lower meth.	5175
DLBC	SERPINE1	cg19722814	OS	0.959073	0.959075	1.03705	Higher meth.	5054
DLBC	SERPINE1	cg19722814	PFS	0.937314	0.937318	0.959742	Lower meth.	5054
DLBC	SERPINE1	cg19722814	DSS	0.938367	0.938382	0.925585	Lower meth.	5054
DLBC	SERPINE1	cg19722814	DFI	0.218096	0.253791	4.10973	Higher meth.	5054
DLBC	SPP1	cg15460348	OS	0.518143	0.521883	0.62532	Lower meth.	6696
DLBC	SPP1	cg15460348	PFS	0.902847	0.902863	0.938635	Lower meth.	6696
DLBC	SPP1	cg15460348	DSS	0.0890878	0.999186	8.23025e-10	Lower meth.	6696
DLBC	SPP1	cg15460348	DFI	0.763693	0.764926	0.691128	Lower meth.	6696
DLBC	TIMP2	cg13694343	OS	0.971505	0.971506	0.974984	Lower meth.	7077
DLBC	TIMP2	cg13694343	PFS	0.709978	0.710401	0.824844	Lower meth.	7077
DLBC	TIMP2	cg13694343	DSS	0.437725	0.451868	0.419008	Lower meth.	7077
DLBC	TIMP2	cg13694343	DFI	0.709013	0.711262	1.58309	Higher meth.	7077
DLBC	TNF	cg04472685	OS	0.798342	0.798606	1.19826	Higher meth.	7124
DLBC	TNF	cg04472685	PFS	0.931928	0.931934	1.04529	Higher meth.	7124
DLBC	TNF	cg04472685	DSS	0.322483	0.345922	2.97466	Higher meth.	7124
DLBC	TNF	cg04472685	DFI	0.58423	0.590942	0.517657	Lower meth.	7124
DLBC	TNFRSF11B	cg19620294	OS	0.387709	0.395235	0.536859	Lower meth.	4982
DLBC	TNFRSF11B	cg19620294	PFS	0.106935	0.117599	0.421994	Lower meth.	4982
DLBC	TNFRSF11B	cg19620294	DSS	0.986264	0.986264	1.01738	Higher meth.	4982
DLBC	TNFRSF11B	cg19620294	DFI	0.378225	0.398368	0.35219	Lower meth.	4982
ESCA	FGF2	cg14703482	OS	0.306861	0.308032	0.785608	Lower meth.	2247
ESCA	FGF2	cg14703482	PFS	0.613866	0.615903	0.908332	Lower meth.	2247
ESCA	FGF2	cg14703482	DSS	0.22752	0.22987	0.694213	Lower meth.	2247
ESCA	FGF2	cg14703482	DFI	0.881296	0.881315	1.06684	Higher meth.	2247
ESCA	ICAM1	cg26549174	OS	0.149395	0.151284	0.716173	Lower meth.	3383
ESCA	ICAM1	cg26549174	PFS	0.144984	0.146773	0.757487	Lower meth.	3383
ESCA	ICAM1	cg26549174	DSS	0.728672	0.728773	0.906915	Lower meth.	3383
ESCA	ICAM1	cg26549174	DFI	0.331914	0.335198	0.6663	Lower meth.	3383
ESCA	ICAM3	cg14145194	OS	0.723547	0.724383	1.08509	Higher meth.	3385
ESCA	ICAM3	cg14145194	PFS	0.193729	0.194274	1.27947	Higher meth.	3385
ESCA	ICAM3	cg14145194	DSS	0.742364	0.742449	1.09737	Higher meth.	3385
ESCA	ICAM3	cg14145194	DFI	0.497315	0.498805	1.33534	Higher meth.	3385
ESCA	ITGA2	cg17480554	OS	0.10487	0.106749	1.46817	Higher meth.	3673
ESCA	ITGA2	cg17480554	PFS	0.214891	0.215834	1.26702	Higher meth.	3673
ESCA	ITGA2	cg17480554	DSS	0.158993	0.161727	1.50694	Higher meth.	3673
ESCA	ITGA2	cg17480554	DFI	0.849176	0.849221	0.916816	Lower meth.	3673
ESCA	LCP1	cg04341806	OS	0.676677	0.676887	0.908778	Lower meth.	3936
ESCA	LCP1	cg04341806	PFS	0.851171	0.851314	0.965241	Lower meth.	3936
ESCA	LCP1	cg04341806	DSS	0.778014	0.778069	0.923836	Lower meth.	3936
ESCA	LCP1	cg04341806	DFI	0.222319	0.227213	0.600452	Lower meth.	3936
ESCA	MMP1	cg13759446	OS	0.908109	0.908843	1.02667	Higher meth.	4312
ESCA	MMP1	cg13759446	PFS	0.240135	0.241051	1.24951	Higher meth.	4312
ESCA	MMP1	cg13759446	DSS	0.966988	0.966988	0.988462	Lower meth.	4312
ESCA	MMP1	cg13759446	DFI	0.241444	0.246471	1.66178	Higher meth.	4312
ESCA	MMP10	cg02061229	OS	0.652875	0.653055	0.9014	Lower meth.	4319
ESCA	MMP10	cg02061229	PFS	0.165625	0.166566	0.768265	Lower meth.	4319
ESCA	MMP10	cg02061229	DSS	0.620007	0.620286	0.868308	Lower meth.	4319
ESCA	MMP10	cg02061229	DFI	0.590079	0.590853	0.796551	Lower meth.	4319
ESCA	MMP12	cg20487452	OS	0.42541	0.42612	0.830587	Lower meth.	4321
ESCA	MMP12	cg20487452	PFS	0.473221	0.472375	0.872195	Lower meth.	4321
ESCA	MMP12	cg20487452	DSS	0.38111	0.382302	0.775534	Lower meth.	4321
ESCA	MMP12	cg20487452	DFI	0.376967	0.379666	1.46056	Higher meth.	4321
ESCA	MMP13	cg10085326	OS	0.291098	0.292715	0.783915	Lower meth.	4322
ESCA	MMP13	cg10085326	PFS	0.0203872	0.0213077	0.642995	Lower meth.	4322
ESCA	MMP13	cg10085326	DSS	0.400506	0.401567	0.789202	Lower meth.	4322
ESCA	MMP13	cg10085326	DFI	0.164599	0.170441	0.553529	Lower meth.	4322
ESCA	MMP14	cg10418289	OS	0.715768	0.716063	0.918103	Lower meth.	4323
ESCA	MMP14	cg10418289	PFS	0.446569	0.447292	0.865003	Lower meth.	4323
ESCA	MMP14	cg10418289	DSS	0.727468	0.727568	0.903909	Lower meth.	4323
ESCA	MMP14	cg10418289	DFI	0.532092	0.533289	0.758353	Lower meth.	4323
ESCA	MMP2	cg08318842	OS	0.883859	0.88316	0.966946	Lower meth.	4313
ESCA	MMP2	cg08318842	PFS	0.601798	0.602383	0.906262	Lower meth.	4313
ESCA	MMP2	cg08318842	DSS	0.881552	0.881561	1.04287	Higher meth.	4313
ESCA	MMP2	cg08318842	DFI	0.419334	0.421604	0.709132	Lower meth.	4313
ESCA	MMP3	cg18113270	OS	0.47454	0.474489	0.847873	Lower meth.	4314
ESCA	MMP3	cg18113270	PFS	0.528988	0.530228	0.887843	Lower meth.	4314
ESCA	MMP3	cg18113270	DSS	0.311419	0.313038	0.751174	Lower meth.	4314
ESCA	MMP3	cg18113270	DFI	0.759376	0.759536	1.14107	Higher meth.	4314
ESCA	MMP9	cg23303369	OS	0.770696	0.770785	0.935283	Lower meth.	4318
ESCA	MMP9	cg23303369	PFS	0.549041	0.550545	0.89281	Lower meth.	4318
ESCA	MMP9	cg23303369	DSS	0.350913	0.352214	0.767321	Lower meth.	4318
ESCA	MMP9	cg23303369	DFI	0.572173	0.57302	0.785945	Lower meth.	4318
ESCA	PECAM1	cg00427260	OS	0.422945	0.424113	1.20423	Higher meth.	5175
ESCA	PECAM1	cg00427260	PFS	0.4385	0.437991	1.1588	Higher meth.	5175
ESCA	PECAM1	cg00427260	DSS	0.49784	0.498462	1.21136	Higher meth.	5175
ESCA	PECAM1	cg00427260	DFI	0.594975	0.595736	1.25022	Higher meth.	5175
ESCA	SERPINE1	cg02273392	OS	0.121738	0.123289	1.44527	Higher meth.	5054
ESCA	SERPINE1	cg02273392	PFS	0.989398	0.98897	0.997379	Lower meth.	5054
ESCA	SERPINE1	cg02273392	DSS	0.218705	0.220936	1.43778	Higher meth.	5054
ESCA	SERPINE1	cg02273392	DFI	0.164019	0.173515	0.469263	Lower meth.	5054
ESCA	SPP1	cg00088885	OS	0.112302	0.114145	0.692674	Lower meth.	6696
ESCA	SPP1	cg00088885	PFS	0.427153	0.42807	0.860283	Lower meth.	6696
ESCA	SPP1	cg00088885	DSS	0.289685	0.291456	0.740207	Lower meth.	6696
ESCA	SPP1	cg00088885	DFI	0.299573	0.303514	1.57568	Higher meth.	6696
ESCA	TIMP2	cg05306745	OS	0.180914	0.182936	1.35792	Higher meth.	7077
ESCA	TIMP2	cg05306745	PFS	0.3209	0.320931	1.20634	Higher meth.	7077
ESCA	TIMP2	cg05306745	DSS	0.975144	0.975144	1.00884	Higher meth.	7077
ESCA	TIMP2	cg05306745	DFI	0.11908	0.125583	1.93083	Higher meth.	7077
ESCA	TNF	cg17755321	OS	0.521155	0.521632	0.862992	Lower meth.	7124
ESCA	TNF	cg17755321	PFS	0.896629	0.897414	1.02462	Higher meth.	7124
ESCA	TNF	cg17755321	DSS	0.86887	0.868881	0.954611	Lower meth.	7124
ESCA	TNF	cg17755321	DFI	0.639517	0.640045	1.216	Higher meth.	7124
ESCA	TNFRSF11B	cg04857420	OS	0.553004	0.553326	0.870628	Lower meth.	4982
ESCA	TNFRSF11B	cg04857420	PFS	0.791514	0.791498	0.95091	Lower meth.	4982
ESCA	TNFRSF11B	cg04857420	DSS	0.306372	0.30808	0.738809	Lower meth.	4982
ESCA	TNFRSF11B	cg04857420	DFI	0.370259	0.373298	1.50622	Higher meth.	4982
GBM	FGF2	cg14887335	OS	0.895027	0.898293	0.973671	Lower meth.	2247
GBM	FGF2	cg14887335	PFS	0.828457	0.833294	0.961007	Lower meth.	2247
GBM	FGF2	cg14887335	DSS	0.982889	0.979479	1.0057	Higher meth.	2247
GBM	ICAM1	cg12151124	OS	0.142126	0.144272	0.734723	Lower meth.	3383
GBM	ICAM1	cg12151124	PFS	0.207439	0.208886	0.787546	Lower meth.	3383
GBM	ICAM1	cg12151124	DSS	0.148534	0.150764	0.726586	Lower meth.	3383
GBM	ICAM3	cg05323251	OS	0.56652	0.569254	0.887579	Lower meth.	3385
GBM	ICAM3	cg05323251	PFS	0.0769351	0.0785489	0.712529	Lower meth.	3385
GBM	ICAM3	cg05323251	DSS	0.73207	0.734936	0.927601	Lower meth.	3385
GBM	ITGA2	cg08874888	OS	0.664311	0.667428	0.913758	Lower meth.	3673
GBM	ITGA2	cg08874888	PFS	0.156567	0.158049	0.7655	Lower meth.	3673
GBM	ITGA2	cg08874888	DSS	0.673924	0.677391	0.911624	Lower meth.	3673
GBM	LCP1	cg04341806	OS	0.211983	0.214391	0.772054	Lower meth.	3936
GBM	LCP1	cg04341806	PFS	0.0527892	0.054046	0.69482	Lower meth.	3936
GBM	LCP1	cg04341806	DSS	0.237382	0.240305	0.770889	Lower meth.	3936
GBM	MMP1	cg13759446	OS	0.767222	0.770311	1.06265	Higher meth.	4312
GBM	MMP1	cg13759446	PFS	0.62436	0.62038	1.098	Higher meth.	4312
GBM	MMP1	cg13759446	DSS	0.912781	0.916074	1.02349	Higher meth.	4312
GBM	MMP10	cg00347729	OS	0.475326	0.474595	0.860484	Lower meth.	4319
GBM	MMP10	cg00347729	PFS	0.519394	0.524584	0.886294	Lower meth.	4319
GBM	MMP10	cg00347729	DSS	0.595951	0.594632	0.888155	Lower meth.	4319
GBM	MMP12	cg09002726	OS	0.253376	0.254459	1.26834	Higher meth.	4321
GBM	MMP12	cg09002726	PFS	0.045472	0.0462655	1.4574	Higher meth.	4321
GBM	MMP12	cg09002726	DSS	0.366439	0.367393	1.221	Higher meth.	4321
GBM	MMP13	cg10085326	OS	0.236548	0.238797	1.28099	Higher meth.	4322
GBM	MMP13	cg10085326	PFS	0.0347313	0.0357996	1.48773	Higher meth.	4322
GBM	MMP13	cg10085326	DSS	0.30624	0.308738	1.25533	Higher meth.	4322
GBM	MMP14	cg10576725	OS	0.981944	0.980594	1.00507	Higher meth.	4323
GBM	MMP14	cg10576725	PFS	0.426327	0.425061	0.860155	Lower meth.	4323
GBM	MMP14	cg10576725	DSS	0.924811	0.923111	1.0215	Higher meth.	4323
GBM	MMP2	cg00078334	OS	0.145304	0.146211	0.738097	Lower meth.	4313
GBM	MMP2	cg00078334	PFS	0.677451	0.675662	0.92408	Lower meth.	4313
GBM	MMP2	cg00078334	DSS	0.159809	0.160609	0.733609	Lower meth.	4313
GBM	MMP3	cg06618666	OS	0.362128	0.365215	1.20807	Higher meth.	4314
GBM	MMP3	cg06618666	PFS	0.196283	0.195203	1.2773	Higher meth.	4314
GBM	MMP3	cg06618666	DSS	0.358752	0.362394	1.22389	Higher meth.	4314
GBM	MMP9	cg10505873	OS	0.601962	0.600222	1.11604	Higher meth.	4318
GBM	MMP9	cg10505873	PFS	0.151195	0.152513	1.31263	Higher meth.	4318
GBM	MMP9	cg10505873	DSS	0.647887	0.645917	1.10725	Higher meth.	4318
GBM	PECAM1	cg00427260	OS	0.916935	0.917806	0.978657	Lower meth.	5175
GBM	PECAM1	cg00427260	PFS	0.651238	0.649097	1.09002	Higher meth.	5175
GBM	PECAM1	cg00427260	DSS	0.907128	0.907982	0.974771	Lower meth.	5175
GBM	SERPINE1	cg01975495	OS	0.939005	0.938543	1.01627	Higher meth.	5054
GBM	SERPINE1	cg01975495	PFS	0.991974	0.992251	1.00184	Higher meth.	5054
GBM	SERPINE1	cg01975495	DSS	0.930609	0.930235	1.01967	Higher meth.	5054
GBM	SPP1	cg11226901	OS	0.459911	0.462318	0.85806	Lower meth.	6696
GBM	SPP1	cg11226901	PFS	0.866902	0.868809	0.969183	Lower meth.	6696
GBM	SPP1	cg11226901	DSS	0.552596	0.554867	0.877912	Lower meth.	6696
GBM	TIMP2	cg11342615	OS	0.949719	0.948665	1.01351	Higher meth.	7077
GBM	TIMP2	cg11342615	PFS	0.309216	0.308165	1.21247	Higher meth.	7077
GBM	TIMP2	cg11342615	DSS	0.718106	0.71776	1.08294	Higher meth.	7077
GBM	TNF	cg06825478	OS	0.456047	0.457661	1.16757	Higher meth.	7124
GBM	TNF	cg06825478	PFS	0.916646	0.909531	1.02166	Higher meth.	7124
GBM	TNF	cg06825478	DSS	0.453192	0.45519	1.17994	Higher meth.	7124
GBM	TNFRSF11B	cg17171407	OS	0.46458	0.465083	0.858302	Lower meth.	4982
GBM	TNFRSF11B	cg17171407	PFS	0.941959	0.94246	0.986444	Lower meth.	4982
GBM	TNFRSF11B	cg17171407	DSS	0.444001	0.444814	0.844044	Lower meth.	4982
HNSC	FGF2	cg17214107	OS	0.981843	0.981999	1.00305	Higher meth.	2247
HNSC	FGF2	cg17214107	PFS	0.793917	0.793663	1.0322	Higher meth.	2247
HNSC	FGF2	cg17214107	DSS	0.623879	0.623818	1.09033	Higher meth.	2247
HNSC	FGF2	cg17214107	DFI	0.402334	0.404332	0.724405	Lower meth.	2247
HNSC	ICAM1	cg26549174	OS	0.136372	0.136931	1.22202	Higher meth.	3383
HNSC	ICAM1	cg26549174	PFS	0.0303867	0.030803	1.30003	Higher meth.	3383
HNSC	ICAM1	cg26549174	DSS	0.0842067	0.0854179	1.35639	Higher meth.	3383
HNSC	ICAM1	cg26549174	DFI	0.483223	0.484489	0.764295	Lower meth.	3383
HNSC	ICAM3	cg14145194	OS	0.0615496	0.0622826	1.28791	Higher meth.	3385
HNSC	ICAM3	cg14145194	PFS	0.149541	0.150094	1.19106	Higher meth.	3385
HNSC	ICAM3	cg14145194	DSS	0.0506447	0.0517637	1.41709	Higher meth.	3385
HNSC	ICAM3	cg14145194	DFI	0.202644	0.207849	0.590095	Lower meth.	3385
HNSC	ITGA2	cg07737131	OS	0.851945	0.851457	1.02567	Higher meth.	3673
HNSC	ITGA2	cg07737131	PFS	0.615613	0.615457	1.06294	Higher meth.	3673
HNSC	ITGA2	cg07737131	DSS	0.668324	0.668157	1.07859	Higher meth.	3673
HNSC	ITGA2	cg07737131	DFI	0.487912	0.489231	1.31641	Higher meth.	3673
HNSC	LCP1	cg04341806	OS	0.535152	0.535733	1.08691	Higher meth.	3936
HNSC	LCP1	cg04341806	PFS	0.624886	0.625375	1.06089	Higher meth.	3936
HNSC	LCP1	cg04341806	DSS	0.367978	0.368889	1.17306	Higher meth.	3936
HNSC	LCP1	cg04341806	DFI	0.612289	0.61287	0.818389	Lower meth.	3936
HNSC	MMP1	cg16575408	OS	0.0583027	0.0589844	1.2909	Higher meth.	4312
HNSC	MMP1	cg16575408	PFS	0.0425095	0.0430374	1.27912	Higher meth.	4312
HNSC	MMP1	cg16575408	DSS	0.11924	0.120362	1.31742	Higher meth.	4312
HNSC	MMP1	cg16575408	DFI	0.626068	0.626618	0.820528	Lower meth.	4312
HNSC	MMP10	cg02061229	OS	0.0497443	0.0504607	0.766382	Lower meth.	4319
HNSC	MMP10	cg02061229	PFS	0.0937815	0.094403	0.81538	Lower meth.	4319
HNSC	MMP10	cg02061229	DSS	0.316738	0.317367	0.838313	Lower meth.	4319
HNSC	MMP10	cg02061229	DFI	0.599001	0.59961	1.22223	Higher meth.	4319
HNSC	MMP12	cg09002726	OS	0.604146	0.603966	1.07229	Higher meth.	4321
HNSC	MMP12	cg09002726	PFS	0.464903	0.465053	1.09246	Higher meth.	4321
HNSC	MMP12	cg09002726	DSS	0.211675	0.212521	1.24809	Higher meth.	4321
HNSC	MMP12	cg09002726	DFI	0.175302	0.180521	1.72407	Higher meth.	4321
HNSC	MMP13	cg19710916	OS	0.330088	0.330741	0.877342	Lower meth.	4322
HNSC	MMP13	cg19710916	PFS	0.582712	0.582366	0.935611	Lower meth.	4322
HNSC	MMP13	cg19710916	DSS	0.138488	0.139804	0.769217	Lower meth.	4322
HNSC	MMP13	cg19710916	DFI	0.845592	0.845626	1.07786	Higher meth.	4322
HNSC	MMP14	cg04219048	OS	0.263032	0.263775	0.860218	Lower meth.	4323
HNSC	MMP14	cg04219048	PFS	0.145891	0.146501	0.838311	Lower meth.	4323
HNSC	MMP14	cg04219048	DSS	0.521906	0.522514	0.893398	Lower meth.	4323
HNSC	MMP14	cg04219048	DFI	0.680159	0.680462	0.855543	Lower meth.	4323
HNSC	MMP2	cg05782444	OS	0.299714	0.300015	1.1497	Higher meth.	4313
HNSC	MMP2	cg05782444	PFS	0.419565	0.41949	1.10266	Higher meth.	4313
HNSC	MMP2	cg05782444	DSS	0.09721	0.0984402	1.34481	Higher meth.	4313
HNSC	MMP2	cg05782444	DFI	0.497055	0.49832	1.30699	Higher meth.	4313
HNSC	MMP3	cg16466334	OS	0.368901	0.369001	0.886257	Lower meth.	4314
HNSC	MMP3	cg16466334	PFS	0.246068	0.246492	0.869106	Lower meth.	4314
HNSC	MMP3	cg16466334	DSS	0.270608	0.271012	0.823108	Lower meth.	4314
HNSC	MMP3	cg16466334	DFI	0.700761	0.701008	1.15675	Higher meth.	4314
HNSC	MMP9	cg00732815	OS	0.561595	0.561704	0.924775	Lower meth.	4318
HNSC	MMP9	cg00732815	PFS	0.967697	0.967189	1.005	Higher meth.	4318
HNSC	MMP9	cg00732815	DSS	0.851307	0.85122	0.967457	Lower meth.	4318
HNSC	MMP9	cg00732815	DFI	0.834883	0.834924	1.08272	Higher meth.	4318
HNSC	PECAM1	cg00427260	OS	0.00403194	0.00426521	1.47391	Higher meth.	5175
HNSC	PECAM1	cg00427260	PFS	0.00649915	0.00673103	1.39146	Higher meth.	5175
HNSC	PECAM1	cg00427260	DSS	0.0144125	0.0151872	1.54145	Higher meth.	5175
HNSC	PECAM1	cg00427260	DFI	0.646385	0.646816	0.837438	Lower meth.	5175
HNSC	SERPINE1	cg02704552	OS	0.00504789	0.0053024	0.686067	Lower meth.	5054
HNSC	SERPINE1	cg02704552	PFS	0.0165343	0.0169192	0.748507	Lower meth.	5054
HNSC	SERPINE1	cg02704552	DSS	0.0435112	0.0445699	0.701048	Lower meth.	5054
HNSC	SERPINE1	cg02704552	DFI	0.0950279	0.100798	0.522543	Lower meth.	5054
HNSC	SPP1	cg00088885	OS	0.723492	0.723819	0.95349	Lower meth.	6696
HNSC	SPP1	cg00088885	PFS	0.623681	0.623311	1.06126	Higher meth.	6696
HNSC	SPP1	cg00088885	DSS	0.857194	0.857551	0.968864	Lower meth.	6696
HNSC	SPP1	cg00088885	DFI	0.142026	0.147374	1.77555	Higher meth.	6696
HNSC	TIMP2	cg00863893	OS	0.0409255	0.0416017	1.31618	Higher meth.	7077
HNSC	TIMP2	cg00863893	PFS	0.0232606	0.0236283	1.31615	Higher meth.	7077
HNSC	TIMP2	cg00863893	DSS	0.039029	0.0401539	1.44129	Higher meth.	7077
HNSC	TIMP2	cg00863893	DFI	0.761711	0.761836	0.889871	Lower meth.	7077
HNSC	TNF	cg17741993	OS	0.000545589	0.000613947	1.59954	Higher meth.	7124
HNSC	TNF	cg17741993	PFS	0.00192646	0.00204587	1.45785	Higher meth.	7124
HNSC	TNF	cg17741993	DSS	0.00188415	0.00214874	1.73299	Higher meth.	7124
HNSC	TNF	cg17741993	DFI	0.414521	0.416511	0.725716	Lower meth.	7124
HNSC	TNFRSF11B	cg19620294	OS	0.236527	0.237058	1.17235	Higher meth.	4982
HNSC	TNFRSF11B	cg19620294	PFS	0.0738944	0.0745141	1.24135	Higher meth.	4982
HNSC	TNFRSF11B	cg19620294	DSS	0.288429	0.289337	1.20612	Higher meth.	4982
HNSC	TNFRSF11B	cg19620294	DFI	0.658826	0.6592	1.18393	Higher meth.	4982
KICH	FGF2	cg25583174	OS	0.383045	0.390267	1.83798	Higher meth.	2247
KICH	FGF2	cg25583174	PFS	0.564337	0.566127	1.40169	Higher meth.	2247
KICH	FGF2	cg25583174	DSS	0.328434	0.341051	2.22097	Higher meth.	2247
KICH	FGF2	cg25583174	DFI	0.279197	0.308908	0.284833	Lower meth.	2247
KICH	ICAM1	cg20036207	OS	0.722535	0.723159	0.788459	Lower meth.	3383
KICH	ICAM1	cg20036207	PFS	0.516414	0.518896	0.685318	Lower meth.	3383
KICH	ICAM1	cg20036207	DSS	0.742692	0.743338	1.28416	Higher meth.	3383
KICH	ICAM1	cg20036207	DFI	0.382423	0.402899	0.358834	Lower meth.	3383
KICH	ICAM3	cg05323251	OS	0.923562	0.923576	1.06653	Higher meth.	3385
KICH	ICAM3	cg05323251	PFS	0.876917	0.876958	0.914412	Lower meth.	3385
KICH	ICAM3	cg05323251	DSS	0.567312	0.570316	0.647841	Lower meth.	3385
KICH	ICAM3	cg05323251	DFI	0.459629	0.473809	0.415813	Lower meth.	3385
KICH	ITGA2	cg07737131	OS	0.581042	0.583162	0.691759	Lower meth.	3673
KICH	ITGA2	cg07737131	PFS	0.760534	0.760829	0.838435	Lower meth.	3673
KICH	ITGA2	cg07737131	DSS	0.566674	0.569695	0.647457	Lower meth.	3673
KICH	ITGA2	cg07737131	DFI	0.954482	0.954491	0.932188	Lower meth.	3673
KICH	LCP1	cg17771150	OS	0.445609	0.450957	1.70457	Higher meth.	3936
KICH	LCP1	cg17771150	PFS	0.710965	0.711503	1.24199	Higher meth.	3936
KICH	LCP1	cg17771150	DSS	0.864416	0.86451	1.13935	Higher meth.	3936
KICH	LCP1	cg17771150	DFI	0.569486	0.576867	0.504339	Lower meth.	3936
KICH	MMP1	cg16575408	OS	0.693038	0.693882	0.767897	Lower meth.	4312
KICH	MMP1	cg16575408	PFS	0.539842	0.541983	0.699533	Lower meth.	4312
KICH	MMP1	cg16575408	DSS	0.243933	0.26124	0.390509	Lower meth.	4312
KICH	MMP1	cg16575408	DFI	0.729931	0.731819	0.65693	Lower meth.	4312
KICH	MMP10	cg02061229	OS	0.265947	0.277625	0.463837	Lower meth.	4319
KICH	MMP10	cg02061229	PFS	0.223092	0.233313	0.481511	Lower meth.	4319
KICH	MMP10	cg02061229	DSS	0.221301	0.239868	0.373778	Lower meth.	4319
KICH	MMP10	cg02061229	DFI	0.658155	0.661849	0.583179	Lower meth.	4319
KICH	MMP12	cg09002726	OS	0.0802815	0.102962	0.270364	Lower meth.	4321
KICH	MMP12	cg09002726	PFS	0.0546483	0.0702621	0.298877	Lower meth.	4321
KICH	MMP12	cg09002726	DSS	0.0503071	0.0879894	0.158264	Lower meth.	4321
KICH	MMP12	cg09002726	DFI	0.47404	0.487085	0.426148	Lower meth.	4321
KICH	MMP13	cg10085326	OS	0.180203	0.195419	0.399829	Lower meth.	4322
KICH	MMP13	cg10085326	PFS	0.73175	0.732165	0.820355	Lower meth.	4322
KICH	MMP13	cg10085326	DSS	0.472742	0.478106	0.581417	Lower meth.	4322
KICH	MMP13	cg10085326	DFI	0.227848	0.998978	3.42455e+08	Higher meth.	4322
KICH	MMP14	cg27020028	OS	0.516306	0.519546	0.648961	Lower meth.	4323
KICH	MMP14	cg27020028	PFS	0.357498	0.363142	0.58691	Lower meth.	4323
KICH	MMP14	cg27020028	DSS	0.51139	0.515692	0.608449	Lower meth.	4323
KICH	MMP14	cg27020028	DFI	0.353524	0.376596	0.338153	Lower meth.	4323
KICH	MMP2	cg04049508	OS	0.235053	0.248042	0.441712	Lower meth.	4313
KICH	MMP2	cg04049508	PFS	0.513747	0.516264	0.683566	Lower meth.	4313
KICH	MMP2	cg04049508	DSS	0.195491	0.215543	0.35465	Lower meth.	4313
KICH	MMP2	cg04049508	DFI	0.569486	0.576867	1.98279	Higher meth.	4313
KICH	MMP3	cg09615874	OS	0.251319	0.263609	0.453393	Lower meth.	4314
KICH	MMP3	cg09615874	PFS	0.387836	0.392751	0.605962	Lower meth.	4314
KICH	MMP3	cg09615874	DSS	0.605217	0.607514	0.675279	Lower meth.	4314
KICH	MMP3	cg09615874	DFI	0.459629	0.473809	2.40493	Higher meth.	4314
KICH	MMP9	cg00732815	OS	0.660706	0.661839	0.745466	Lower meth.	4318
KICH	MMP9	cg00732815	PFS	0.450278	0.45389	0.644852	Lower meth.	4318
KICH	MMP9	cg00732815	DSS	0.664741	0.666155	0.719034	Lower meth.	4318
KICH	MMP9	cg00732815	DFI	0.890344	0.890469	1.18528	Higher meth.	4318
KICH	PECAM1	cg02459519	OS	0.218757	0.232412	0.429531	Lower meth.	5175
KICH	PECAM1	cg02459519	PFS	0.197419	0.208495	0.462681	Lower meth.	5175
KICH	PECAM1	cg02459519	DSS	0.550634	0.553998	0.636095	Lower meth.	5175
KICH	PECAM1	cg02459519	DFI	0.881206	0.881369	0.832599	Lower meth.	5175
KICH	SERPINE1	cg01975495	OS	0.606441	0.608205	0.708825	Lower meth.	5054
KICH	SERPINE1	cg01975495	PFS	0.171856	0.183745	0.442945	Lower meth.	5054
KICH	SERPINE1	cg01975495	DSS	0.604128	0.606445	0.674517	Lower meth.	5054
KICH	SERPINE1	cg01975495	DFI	0.171938	0.999312	9.18808e-10	Lower meth.	5054
KICH	SPP1	cg20261167	OS	0.607564	0.609306	0.709338	Lower meth.	6696
KICH	SPP1	cg20261167	PFS	0.360973	0.366501	0.588672	Lower meth.	6696
KICH	SPP1	cg20261167	DSS	0.568884	0.571852	0.648843	Lower meth.	6696
KICH	SPP1	cg20261167	DFI	0.235639	0.269084	0.253764	Lower meth.	6696
KICH	TIMP2	cg26927190	OS	0.943874	0.943879	1.04843	Higher meth.	7077
KICH	TIMP2	cg26927190	PFS	0.875804	0.875846	0.913728	Lower meth.	7077
KICH	TIMP2	cg26927190	DSS	0.893957	0.894003	1.10732	Higher meth.	7077
KICH	TIMP2	cg26927190	DFI	0.556472	0.564514	0.493207	Lower meth.	7077
KICH	TNF	cg10650821	OS	0.564312	0.566693	0.680664	Lower meth.	7124
KICH	TNF	cg10650821	PFS	0.403311	0.407888	0.615812	Lower meth.	7124
KICH	TNF	cg10650821	DSS	0.556464	0.5597	0.640193	Lower meth.	7124
KICH	TNF	cg10650821	DFI	0.589708	0.596162	0.522408	Lower meth.	7124
KICH	TNFRSF11B	cg17171407	OS	0.859397	0.859479	0.88794	Lower meth.	4982
KICH	TNFRSF11B	cg17171407	PFS	0.477308	0.480423	1.51202	Higher meth.	4982
KICH	TNFRSF11B	cg17171407	DSS	0.799814	0.800118	0.824052	Lower meth.	4982
KICH	TNFRSF11B	cg17171407	DFI	0.0409007	0.999276	2.37046e+09	Higher meth.	4982
KIRC	FGF2	cg03737475	OS	0.0161674	0.0171355	0.622572	Lower meth.	2247
KIRC	FGF2	cg03737475	PFS	0.226732	0.227888	0.812334	Lower meth.	2247
KIRC	FGF2	cg03737475	DSS	0.0749164	0.0771722	0.648355	Lower meth.	2247
KIRC	FGF2	cg03737475	DFI	0.313126	0.320471	1.84088	Higher meth.	2247
KIRC	ICAM1	cg26549174	OS	0.581757	0.581704	0.897614	Lower meth.	3383
KIRC	ICAM1	cg26549174	PFS	0.720081	0.720372	0.940971	Lower meth.	3383
KIRC	ICAM1	cg26549174	DSS	0.570513	0.570483	0.870889	Lower meth.	3383
KIRC	ICAM1	cg26549174	DFI	0.861998	0.86205	1.10174	Higher meth.	3383
KIRC	ICAM3	cg05323251	OS	0.00386258	0.00436043	0.56524	Lower meth.	3385
KIRC	ICAM3	cg05323251	PFS	0.0855536	0.0870027	0.746485	Lower meth.	3385
KIRC	ICAM3	cg05323251	DSS	0.000904701	0.00126249	0.432485	Lower meth.	3385
KIRC	ICAM3	cg05323251	DFI	0.99436	0.99436	0.995952	Lower meth.	3385
KIRC	ITGA2	cg05928650	OS	0.00286711	0.00329466	0.54886	Lower meth.	3673
KIRC	ITGA2	cg05928650	PFS	0.0212094	0.021996	0.672542	Lower meth.	3673
KIRC	ITGA2	cg05928650	DSS	0.0325305	0.0345667	0.589339	Lower meth.	3673
KIRC	ITGA2	cg05928650	DFI	0.981376	0.981376	0.987004	Lower meth.	3673
KIRC	LCP1	cg17771150	OS	0.00221817	0.00258379	0.546581	Lower meth.	3936
KIRC	LCP1	cg17771150	PFS	0.184454	0.185996	0.798118	Lower meth.	3936
KIRC	LCP1	cg17771150	DSS	0.00142353	0.00188962	0.450251	Lower meth.	3936
KIRC	LCP1	cg17771150	DFI	0.549665	0.551467	1.41892	Higher meth.	3936
KIRC	MMP1	cg13759446	OS	0.725701	0.725746	1.07092	Higher meth.	4312
KIRC	MMP1	cg13759446	PFS	0.499144	0.498939	1.12195	Higher meth.	4312
KIRC	MMP1	cg13759446	DSS	0.670649	0.67043	1.10882	Higher meth.	4312
KIRC	MMP1	cg13759446	DFI	0.300849	0.307176	1.77158	Higher meth.	4312
KIRC	MMP10	cg00347729	OS	0.782378	0.782145	1.05548	Higher meth.	4319
KIRC	MMP10	cg00347729	PFS	0.623891	0.624409	1.08669	Higher meth.	4319
KIRC	MMP10	cg00347729	DSS	0.597809	0.598103	0.879186	Lower meth.	4319
KIRC	MMP10	cg00347729	DFI	0.222173	0.231084	0.504559	Lower meth.	4319
KIRC	MMP12	cg23979520	OS	0.0172872	0.0183398	0.624902	Lower meth.	4321
KIRC	MMP12	cg23979520	PFS	0.00810241	0.00867657	0.635528	Lower meth.	4321
KIRC	MMP12	cg23979520	DSS	0.00426832	0.00515354	0.488031	Lower meth.	4321
KIRC	MMP12	cg23979520	DFI	0.751185	0.751495	0.838316	Lower meth.	4321
KIRC	MMP13	cg14995062	OS	0.0488318	0.0501928	0.679127	Lower meth.	4322
KIRC	MMP13	cg14995062	PFS	0.619933	0.620604	0.919212	Lower meth.	4322
KIRC	MMP13	cg14995062	DSS	0.04276	0.0449668	0.606286	Lower meth.	4322
KIRC	MMP13	cg14995062	DFI	0.051955	0.072095	4.00859	Higher meth.	4322
KIRC	MMP14	cg24698488	OS	0.413999	0.414312	1.17362	Higher meth.	4323
KIRC	MMP14	cg24698488	PFS	0.521464	0.520894	1.1154	Higher meth.	4323
KIRC	MMP14	cg24698488	DSS	0.889093	0.888694	1.03454	Higher meth.	4323
KIRC	MMP14	cg24698488	DFI	0.284956	0.291485	0.551137	Lower meth.	4323
KIRC	MMP2	cg00087906	OS	0.484029	0.483934	1.14728	Higher meth.	4313
KIRC	MMP2	cg00087906	PFS	0.113953	0.115029	1.31035	Higher meth.	4313
KIRC	MMP2	cg00087906	DSS	0.142298	0.144309	1.43055	Higher meth.	4313
KIRC	MMP2	cg00087906	DFI	0.252189	0.261007	1.97885	Higher meth.	4313
KIRC	MMP3	cg16466334	OS	0.00186239	0.00218811	0.539434	Lower meth.	4314
KIRC	MMP3	cg16466334	PFS	0.000828716	0.000970339	0.565103	Lower meth.	4314
KIRC	MMP3	cg16466334	DSS	0.00324675	0.00398169	0.481043	Lower meth.	4314
KIRC	MMP3	cg16466334	DFI	0.40607	0.410081	0.630686	Lower meth.	4314
KIRC	MMP9	cg04656101	OS	0.4541	0.454311	0.863453	Lower meth.	4318
KIRC	MMP9	cg04656101	PFS	0.0357312	0.0366048	0.697347	Lower meth.	4318
KIRC	MMP9	cg04656101	DSS	0.402957	0.403524	0.815274	Lower meth.	4318
KIRC	MMP9	cg04656101	DFI	0.505999	0.508184	0.683173	Lower meth.	4318
KIRC	PECAM1	cg00879592	OS	0.00526907	0.00585587	1.7325	Higher meth.	5175
KIRC	PECAM1	cg00879592	PFS	0.0243134	0.0251061	1.46731	Higher meth.	5175
KIRC	PECAM1	cg00879592	DSS	0.00174062	0.00225091	2.17324	Higher meth.	5175
KIRC	PECAM1	cg00879592	DFI	0.804043	0.804201	1.15215	Higher meth.	5175
KIRC	SERPINE1	cg12584355	OS	0.757754	0.757531	0.941372	Lower meth.	5054
KIRC	SERPINE1	cg12584355	PFS	0.66098	0.661943	0.9282	Lower meth.	5054
KIRC	SERPINE1	cg12584355	DSS	0.284421	0.285612	0.768615	Lower meth.	5054
KIRC	SERPINE1	cg12584355	DFI	0.264904	0.272513	0.532981	Lower meth.	5054
KIRC	SPP1	cg15460348	OS	0.0216706	0.0228093	0.633998	Lower meth.	6696
KIRC	SPP1	cg15460348	PFS	0.0727104	0.073709	0.736403	Lower meth.	6696
KIRC	SPP1	cg15460348	DSS	0.065106	0.0674073	0.6371	Lower meth.	6696
KIRC	SPP1	cg15460348	DFI	0.128834	0.143697	2.62387	Higher meth.	6696
KIRC	TIMP2	cg00863893	OS	0.273169	0.273982	1.24017	Higher meth.	7077
KIRC	TIMP2	cg00863893	PFS	0.183353	0.183747	1.25532	Higher meth.	7077
KIRC	TIMP2	cg00863893	DSS	0.14514	0.147332	1.43214	Higher meth.	7077
KIRC	TIMP2	cg00863893	DFI	0.210343	0.220435	0.475028	Lower meth.	7077
KIRC	TNF	cg09637172	OS	0.723897	0.723982	0.933247	Lower meth.	7124
KIRC	TNF	cg09637172	PFS	0.791601	0.791171	1.04603	Higher meth.	7124
KIRC	TNF	cg09637172	DSS	0.325676	0.326898	0.785335	Lower meth.	7124
KIRC	TNF	cg09637172	DFI	0.436671	0.440297	0.642812	Lower meth.	7124
KIRC	TNFRSF11B	cg17171407	OS	0.0173785	0.0184184	1.59144	Higher meth.	4982
KIRC	TNFRSF11B	cg17171407	PFS	0.0152696	0.0159486	1.50908	Higher meth.	4982
KIRC	TNFRSF11B	cg17171407	DSS	0.00656062	0.00760297	1.94071	Higher meth.	4982
KIRC	TNFRSF11B	cg17171407	DFI	0.570931	0.572411	1.37651	Higher meth.	4982
KIRP	FGF2	cg12632152	OS	0.0741772	0.0783037	1.79446	Higher meth.	2247
KIRP	FGF2	cg12632152	PFS	0.77376	0.773804	1.07307	Higher meth.	2247
KIRP	FGF2	cg12632152	DSS	0.136423	0.142018	1.79661	Higher meth.	2247
KIRP	FGF2	cg12632152	DFI	0.71127	0.711524	0.861405	Lower meth.	2247
KIRP	ICAM1	cg26549174	OS	0.526783	0.527457	1.22304	Higher meth.	3383
KIRP	ICAM1	cg26549174	PFS	0.639906	0.640086	0.891286	Lower meth.	3383
KIRP	ICAM1	cg26549174	DSS	0.490124	0.4914	1.30581	Higher meth.	3383
KIRP	ICAM1	cg26549174	DFI	0.503005	0.5041	1.29189	Higher meth.	3383
KIRP	ICAM3	cg05323251	OS	0.702891	0.703061	1.12828	Higher meth.	3385
KIRP	ICAM3	cg05323251	PFS	0.844678	0.844692	1.04926	Higher meth.	3385
KIRP	ICAM3	cg05323251	DSS	0.49658	0.497814	1.30035	Higher meth.	3385
KIRP	ICAM3	cg05323251	DFI	0.267727	0.271236	0.650951	Lower meth.	3385
KIRP	ITGA2	cg20674638	OS	0.478043	0.478966	1.25269	Higher meth.	3673
KIRP	ITGA2	cg20674638	PFS	0.770417	0.770464	1.07402	Higher meth.	3673
KIRP	ITGA2	cg20674638	DSS	0.366095	0.368564	1.42237	Higher meth.	3673
KIRP	ITGA2	cg20674638	DFI	0.942337	0.942339	1.02781	Higher meth.	3673
KIRP	LCP1	cg17771150	OS	0.372718	0.374322	0.752538	Lower meth.	3936
KIRP	LCP1	cg17771150	PFS	0.231651	0.233335	0.744005	Lower meth.	3936
KIRP	LCP1	cg17771150	DSS	0.492	0.493266	0.766864	Lower meth.	3936
KIRP	LCP1	cg17771150	DFI	0.0996096	0.105297	0.525628	Lower meth.	3936
KIRP	MMP1	cg14543953	OS	0.0486008	0.0526467	0.518779	Lower meth.	4312
KIRP	MMP1	cg14543953	PFS	0.123476	0.125716	0.681666	Lower meth.	4312
KIRP	MMP1	cg14543953	DSS	0.00193542	0.00426399	0.241958	Lower meth.	4312
KIRP	MMP1	cg14543953	DFI	0.314823	0.318133	0.660424	Lower meth.	4312
KIRP	MMP10	cg00347729	OS	0.5796	0.580078	1.19171	Higher meth.	4319
KIRP	MMP10	cg00347729	PFS	0.577507	0.577795	1.14643	Higher meth.	4319
KIRP	MMP10	cg00347729	DSS	0.365631	0.368037	1.41803	Higher meth.	4319
KIRP	MMP10	cg00347729	DFI	0.504774	0.505902	1.29046	Higher meth.	4319
KIRP	MMP12	cg09002726	OS	0.000542654	0.00115352	0.291979	Lower meth.	4321
KIRP	MMP12	cg09002726	PFS	0.00640035	0.00752054	0.497636	Lower meth.	4321
KIRP	MMP12	cg09002726	DSS	0.000178068	0.000988572	0.167887	Lower meth.	4321
KIRP	MMP12	cg09002726	DFI	0.117881	0.123535	0.538725	Lower meth.	4321
KIRP	MMP13	cg03331229	OS	0.0100455	0.0125325	0.422066	Lower meth.	4322
KIRP	MMP13	cg03331229	PFS	0.000896045	0.0012535	0.431379	Lower meth.	4322
KIRP	MMP13	cg03331229	DSS	0.00245917	0.00475211	0.270527	Lower meth.	4322
KIRP	MMP13	cg03331229	DFI	0.0163196	0.0211578	0.363817	Lower meth.	4322
KIRP	MMP14	cg10418289	OS	0.969805	0.969805	1.01208	Higher meth.	4323
KIRP	MMP14	cg10418289	PFS	0.558192	0.558526	0.866201	Lower meth.	4323
KIRP	MMP14	cg10418289	DSS	0.812218	0.812282	1.09599	Higher meth.	4323
KIRP	MMP14	cg10418289	DFI	0.962187	0.962187	0.982015	Lower meth.	4323
KIRP	MMP2	cg09350341	OS	0.00848266	0.0103831	2.32527	Higher meth.	4313
KIRP	MMP2	cg09350341	PFS	0.0899671	0.092242	1.52665	Higher meth.	4313
KIRP	MMP2	cg09350341	DSS	0.0216843	0.0260293	2.46994	Higher meth.	4313
KIRP	MMP2	cg09350341	DFI	0.399433	0.401471	1.39525	Higher meth.	4313
KIRP	MMP3	cg09615874	OS	0.0656768	0.0699217	0.541801	Lower meth.	4314
KIRP	MMP3	cg09615874	PFS	0.0193548	0.0211583	0.551451	Lower meth.	4314
KIRP	MMP3	cg09615874	DSS	0.187769	0.192715	0.594764	Lower meth.	4314
KIRP	MMP3	cg09615874	DFI	0.422332	0.424008	0.732207	Lower meth.	4314
KIRP	MMP9	cg00732815	OS	0.164395	0.167788	1.55635	Higher meth.	4318
KIRP	MMP9	cg00732815	PFS	0.490257	0.490766	1.1838	Higher meth.	4318
KIRP	MMP9	cg00732815	DSS	0.163508	0.168602	1.71576	Higher meth.	4318
KIRP	MMP9	cg00732815	DFI	0.749626	0.74977	1.12922	Higher meth.	4318
KIRP	PECAM1	cg00427260	OS	0.0587648	0.0626426	0.542554	Lower meth.	5175
KIRP	PECAM1	cg00427260	PFS	0.0487238	0.0509076	0.615063	Lower meth.	5175
KIRP	PECAM1	cg00427260	DSS	0.104788	0.110613	0.528016	Lower meth.	5175
KIRP	PECAM1	cg00427260	DFI	0.00307948	0.00522552	0.29098	Lower meth.	5175
KIRP	SERPINE1	cg17968347	OS	0.753457	0.753554	0.905244	Lower meth.	5054
KIRP	SERPINE1	cg17968347	PFS	0.970619	0.970619	0.99102	Lower meth.	5054
KIRP	SERPINE1	cg17968347	DSS	0.851017	0.851049	1.07508	Higher meth.	5054
KIRP	SERPINE1	cg17968347	DFI	0.751844	0.751984	0.886908	Lower meth.	5054
KIRP	SPP1	cg15460348	OS	0.0145547	0.0174739	2.27339	Higher meth.	6696
KIRP	SPP1	cg15460348	PFS	0.0255813	0.0275134	1.74701	Higher meth.	6696
KIRP	SPP1	cg15460348	DSS	0.000283974	0.00132409	5.69949	Higher meth.	6696
KIRP	SPP1	cg15460348	DFI	0.08328	0.0890836	1.98056	Higher meth.	6696
KIRP	TIMP2	cg11342615	OS	0.0610172	0.0650737	1.84568	Higher meth.	7077
KIRP	TIMP2	cg11342615	PFS	0.0972503	0.0995704	1.5095	Higher meth.	7077
KIRP	TIMP2	cg11342615	DSS	0.058655	0.0647505	2.12781	Higher meth.	7077
KIRP	TIMP2	cg11342615	DFI	0.275787	0.279093	1.51032	Higher meth.	7077
KIRP	TNF	cg21467614	OS	0.399709	0.401097	1.30647	Higher meth.	7124
KIRP	TNF	cg21467614	PFS	0.383243	0.38413	1.23811	Higher meth.	7124
KIRP	TNF	cg21467614	DSS	0.198009	0.202823	1.66149	Higher meth.	7124
KIRP	TNF	cg21467614	DFI	0.754652	0.754803	0.88318	Lower meth.	7124
KIRP	TNFRSF11B	cg17171407	OS	0.000328753	0.000736954	3.43673	Higher meth.	4982
KIRP	TNFRSF11B	cg17171407	PFS	0.0229211	0.0247229	1.75269	Higher meth.	4982
KIRP	TNFRSF11B	cg17171407	DSS	1.3569e-05	0.00033229	9.02106	Higher meth.	4982
KIRP	TNFRSF11B	cg17171407	DFI	0.0489582	0.0540442	2.10172	Higher meth.	4982
LAML	FGF2	cg12632152	OS	0.530966	0.542065	1.11939	Higher meth.	2247
LAML	ICAM1	cg10651168	OS	0.0843788	0.0850561	0.727141	Lower meth.	3383
LAML	ICAM3	cg14145194	OS	0.0744613	0.0791224	0.718375	Lower meth.	3385
LAML	ITGA2	cg07737131	OS	0.799841	0.804489	1.04685	Higher meth.	3673
LAML	LCP1	cg02696428	OS	0.557207	0.558995	0.897839	Lower meth.	3936
LAML	MMP1	cg16575408	OS	0.927312	0.90587	0.978443	Lower meth.	4312
LAML	MMP10	cg02061229	OS	0.00299942	0.00329411	0.57847	Lower meth.	4319
LAML	MMP12	cg02368591	OS	0.28051	0.283412	0.820074	Lower meth.	4321
LAML	MMP13	cg19710916	OS	0.858909	0.860967	0.967982	Lower meth.	4322
LAML	MMP14	cg13094752	OS	0.240199	0.245143	1.24119	Higher meth.	4323
LAML	MMP2	cg00078334	OS	0.167083	0.170793	1.28956	Higher meth.	4313
LAML	MMP3	cg17145397	OS	0.979107	0.979338	0.995233	Lower meth.	4314
LAML	MMP9	cg04656101	OS	0.797701	0.803155	0.955062	Lower meth.	4318
LAML	PECAM1	cg20830994	OS	0.663042	0.671732	0.924572	Lower meth.	5175
LAML	SERPINE1	cg20583316	OS	0.0396936	0.0414117	1.46045	Higher meth.	5054
LAML	SPP1	cg20261167	OS	0.537882	0.532027	0.891119	Lower meth.	6696
LAML	TIMP2	cg11342615	OS	0.561366	0.567669	0.899681	Lower meth.	7077
LAML	TNF	cg04472685	OS	0.404228	0.399009	1.16877	Higher meth.	7124
LAML	TNFRSF11B	cg13268132	OS	0.601897	0.600455	1.10151	Higher meth.	4982
LGG	FGF2	cg03941587	OS	8.0315e-05	0.000111359	0.489533	Lower meth.	2247
LGG	FGF2	cg03941587	PFS	5.12433e-06	7.28324e-06	0.522886	Lower meth.	2247
LGG	FGF2	cg03941587	DSS	0.000157559	0.000212665	0.488602	Lower meth.	2247
LGG	FGF2	cg03941587	DFI	0.187539	0.193782	0.556964	Lower meth.	2247
LGG	ICAM1	cg00500176	OS	4.36996e-06	7.76457e-06	0.433233	Lower meth.	3383
LGG	ICAM1	cg00500176	PFS	4.5949e-05	5.8007e-05	0.559747	Lower meth.	3383
LGG	ICAM1	cg00500176	DSS	1.0176e-05	1.7437e-05	0.430099	Lower meth.	3383
LGG	ICAM1	cg00500176	DFI	0.610168	0.610941	1.25727	Higher meth.	3383
LGG	ICAM3	cg14145194	OS	8.9613e-05	0.000121979	0.49421	Lower meth.	3385
LGG	ICAM3	cg14145194	PFS	0.000612058	0.000686937	0.616123	Lower meth.	3385
LGG	ICAM3	cg14145194	DSS	0.000130581	0.000179137	0.483581	Lower meth.	3385
LGG	ICAM3	cg14145194	DFI	0.282055	0.287022	1.6482	Higher meth.	3385
LGG	ITGA2	cg08874888	OS	0.237705	0.238795	1.23647	Higher meth.	3673
LGG	ITGA2	cg08874888	PFS	0.562733	0.562856	0.921534	Lower meth.	3673
LGG	ITGA2	cg08874888	DSS	0.409886	0.410638	1.16818	Higher meth.	3673
LGG	ITGA2	cg08874888	DFI	0.047709	0.0560303	0.392646	Lower meth.	3673
LGG	LCP1	cg17771150	OS	0.00287534	0.0032096	0.585404	Lower meth.	3936
LGG	LCP1	cg17771150	PFS	0.000614634	0.000692011	0.616235	Lower meth.	3936
LGG	LCP1	cg17771150	DSS	0.00226148	0.00258459	0.561267	Lower meth.	3936
LGG	LCP1	cg17771150	DFI	0.421393	0.423931	1.44222	Higher meth.	3936
LGG	MMP1	cg16575408	OS	0.39294	0.393914	0.856685	Lower meth.	4312
LGG	MMP1	cg16575408	PFS	0.171921	0.172341	0.823724	Lower meth.	4312
LGG	MMP1	cg16575408	DSS	0.327449	0.328653	0.830102	Lower meth.	4312
LGG	MMP1	cg16575408	DFI	0.421594	0.42412	0.69326	Lower meth.	4312
LGG	MMP10	cg00347729	OS	0.054135	0.0554011	0.706676	Lower meth.	4319
LGG	MMP10	cg00347729	PFS	0.0068947	0.00723152	0.681076	Lower meth.	4319
LGG	MMP10	cg00347729	DSS	0.0222924	0.0234002	0.646505	Lower meth.	4319
LGG	MMP10	cg00347729	DFI	0.437903	0.440188	0.706653	Lower meth.	4319
LGG	MMP12	cg14948108	OS	0.00883248	0.00945499	0.624445	Lower meth.	4321
LGG	MMP12	cg14948108	PFS	0.00158185	0.00172554	0.639406	Lower meth.	4321
LGG	MMP12	cg14948108	DSS	0.0174416	0.0183565	0.63885	Lower meth.	4321
LGG	MMP12	cg14948108	DFI	0.100912	0.108494	0.478947	Lower meth.	4321
LGG	MMP13	cg24301681	OS	0.00557876	0.00606456	0.608223	Lower meth.	4322
LGG	MMP13	cg24301681	PFS	0.00513754	0.00542128	0.672992	Lower meth.	4322
LGG	MMP13	cg24301681	DSS	0.00884154	0.00951996	0.610236	Lower meth.	4322
LGG	MMP13	cg24301681	DFI	0.00412437	0.00781502	0.251309	Lower meth.	4322
LGG	MMP14	cg08321366	OS	4.01272e-09	1.90736e-08	0.340505	Lower meth.	4323
LGG	MMP14	cg08321366	PFS	5.87079e-08	1.1753e-07	0.46122	Lower meth.	4323
LGG	MMP14	cg08321366	DSS	2.26029e-08	9.08408e-08	0.342621	Lower meth.	4323
LGG	MMP14	cg08321366	DFI	0.175002	0.181397	0.546983	Lower meth.	4323
LGG	MMP2	cg00078334	OS	0.829242	0.82933	1.03943	Higher meth.	4313
LGG	MMP2	cg00078334	PFS	0.467813	0.467948	1.10835	Higher meth.	4313
LGG	MMP2	cg00078334	DSS	0.967978	0.968038	1.0076	Higher meth.	4313
LGG	MMP2	cg00078334	DFI	0.699268	0.699637	0.838467	Lower meth.	4313
LGG	MMP3	cg23438592	OS	6.22916e-10	4.3407e-09	0.31671	Lower meth.	4314
LGG	MMP3	cg23438592	PFS	3.0956e-09	8.45388e-09	0.42997	Lower meth.	4314
LGG	MMP3	cg23438592	DSS	7.41062e-10	6.4533e-09	0.295527	Lower meth.	4314
LGG	MMP3	cg23438592	DFI	0.297004	0.301269	0.629269	Lower meth.	4314
LGG	MMP9	cg10505873	OS	4.44286e-09	2.36738e-08	0.330951	Lower meth.	4318
LGG	MMP9	cg10505873	PFS	1.92346e-12	1.44875e-11	0.357242	Lower meth.	4318
LGG	MMP9	cg10505873	DSS	1.38007e-09	1.12141e-08	0.298747	Lower meth.	4318
LGG	MMP9	cg10505873	DFI	0.00486948	0.00808238	0.285647	Lower meth.	4318
LGG	PECAM1	cg20830994	OS	5.5913e-05	8.1237e-05	0.472771	Lower meth.	5175
LGG	PECAM1	cg20830994	PFS	0.000217058	0.000255915	0.590878	Lower meth.	5175
LGG	PECAM1	cg20830994	DSS	9.804e-05	0.000140018	0.469096	Lower meth.	5175
LGG	PECAM1	cg20830994	DFI	0.455818	0.457962	1.4036	Higher meth.	5175
LGG	SERPINE1	cg19722814	OS	4.99929e-11	5.87021e-10	0.295307	Lower meth.	5054
LGG	SERPINE1	cg19722814	PFS	7.51121e-12	4.37716e-11	0.37507	Lower meth.	5054
LGG	SERPINE1	cg19722814	DSS	8.97218e-11	1.1178e-09	0.284594	Lower meth.	5054
LGG	SERPINE1	cg19722814	DFI	0.0977514	0.105051	0.48248	Lower meth.	5054
LGG	SPP1	cg00088885	OS	0.000150244	0.000198574	0.50329	Lower meth.	6696
LGG	SPP1	cg00088885	PFS	0.0206041	0.0211317	0.720511	Lower meth.	6696
LGG	SPP1	cg00088885	DSS	8.0889e-05	0.000116894	0.468514	Lower meth.	6696
LGG	SPP1	cg00088885	DFI	0.627503	0.62818	0.804229	Lower meth.	6696
LGG	TIMP2	cg05376904	OS	0.000312721	0.0004021	0.507392	Lower meth.	7077
LGG	TIMP2	cg05376904	PFS	3.49103e-07	6.27668e-07	0.478257	Lower meth.	7077
LGG	TIMP2	cg05376904	DSS	0.000217337	0.000296292	0.479691	Lower meth.	7077
LGG	TIMP2	cg05376904	DFI	0.137503	0.144586	0.518902	Lower meth.	7077
LGG	TNF	cg23384708	OS	0.000175969	0.000226159	0.508749	Lower meth.	7124
LGG	TNF	cg23384708	PFS	0.00224976	0.00241859	0.649298	Lower meth.	7124
LGG	TNF	cg23384708	DSS	0.00033156	0.000419344	0.506704	Lower meth.	7124
LGG	TNF	cg23384708	DFI	0.282775	0.287346	0.619734	Lower meth.	7124
LGG	TNFRSF11B	cg17171407	OS	8.98832e-11	1.00404e-09	0.294415	Lower meth.	4982
LGG	TNFRSF11B	cg17171407	PFS	2.64391e-10	9.62613e-10	0.405151	Lower meth.	4982
LGG	TNFRSF11B	cg17171407	DSS	2.84463e-10	2.87957e-09	0.290545	Lower meth.	4982
LGG	TNFRSF11B	cg17171407	DFI	0.125394	0.132482	0.508954	Lower meth.	4982
LIHC	FGF2	cg15128226	OS	0.188898	0.189695	0.794577	Lower meth.	2247
LIHC	FGF2	cg15128226	PFS	0.551092	0.551139	0.924087	Lower meth.	2247
LIHC	FGF2	cg15128226	DSS	0.365598	0.366705	0.816471	Lower meth.	2247
LIHC	FGF2	cg15128226	DFI	0.849936	0.849458	0.968913	Lower meth.	2247
LIHC	ICAM1	cg00500176	OS	0.0146916	0.0154178	0.651643	Lower meth.	3383
LIHC	ICAM1	cg00500176	PFS	0.251404	0.25192	0.859391	Lower meth.	3383
LIHC	ICAM1	cg00500176	DSS	0.0815663	0.0834713	0.676713	Lower meth.	3383
LIHC	ICAM1	cg00500176	DFI	0.712047	0.711947	0.940621	Lower meth.	3383
LIHC	ICAM3	cg13981319	OS	0.552254	0.552447	1.10925	Higher meth.	3385
LIHC	ICAM3	cg13981319	PFS	0.837473	0.836832	0.973115	Lower meth.	3385
LIHC	ICAM3	cg13981319	DSS	0.70454	0.705087	0.918422	Lower meth.	3385
LIHC	ICAM3	cg13981319	DFI	0.298716	0.299091	0.841619	Lower meth.	3385
LIHC	ITGA2	cg04996689	OS	0.0674599	0.0685618	0.726423	Lower meth.	3673
LIHC	ITGA2	cg04996689	PFS	0.048488	0.049063	0.770463	Lower meth.	3673
LIHC	ITGA2	cg04996689	DSS	0.0240413	0.0255371	0.603746	Lower meth.	3673
LIHC	ITGA2	cg04996689	DFI	0.212442	0.212876	0.81402	Lower meth.	3673
LIHC	LCP1	cg17771150	OS	0.932379	0.932828	1.01481	Higher meth.	3936
LIHC	LCP1	cg17771150	PFS	0.860126	0.859556	0.976882	Lower meth.	3936
LIHC	LCP1	cg17771150	DSS	0.89923	0.899268	0.971987	Lower meth.	3936
LIHC	LCP1	cg17771150	DFI	0.880533	0.880202	1.02526	Higher meth.	3936
LIHC	MMP1	cg25320665	OS	0.908037	0.907736	1.02047	Higher meth.	4312
LIHC	MMP1	cg25320665	PFS	0.830692	0.830953	0.972041	Lower meth.	4312
LIHC	MMP1	cg25320665	DSS	0.874215	0.874658	1.03596	Higher meth.	4312
LIHC	MMP1	cg25320665	DFI	0.70452	0.704372	0.939032	Lower meth.	4312
LIHC	MMP10	cg00347729	OS	0.327793	0.328377	0.842752	Lower meth.	4319
LIHC	MMP10	cg00347729	PFS	0.178895	0.17893	0.837239	Lower meth.	4319
LIHC	MMP10	cg00347729	DSS	0.126951	0.128574	0.706082	Lower meth.	4319
LIHC	MMP10	cg00347729	DFI	0.153189	0.153921	0.789421	Lower meth.	4319
LIHC	MMP12	cg20487452	OS	0.320709	0.321322	0.840507	Lower meth.	4321
LIHC	MMP12	cg20487452	PFS	0.201364	0.201324	0.843962	Lower meth.	4321
LIHC	MMP12	cg20487452	DSS	0.654692	0.654447	0.904555	Lower meth.	4321
LIHC	MMP12	cg20487452	DFI	0.165233	0.166126	0.795006	Lower meth.	4321
LIHC	MMP13	cg22658979	OS	0.493137	0.494291	1.12762	Higher meth.	4322
LIHC	MMP13	cg22658979	PFS	0.692256	0.693406	1.05381	Higher meth.	4322
LIHC	MMP13	cg22658979	DSS	0.240369	0.242342	1.30273	Higher meth.	4322
LIHC	MMP13	cg22658979	DFI	0.747314	0.748681	1.05458	Higher meth.	4322
LIHC	MMP14	cg10418289	OS	0.301768	0.302564	0.834898	Lower meth.	4323
LIHC	MMP14	cg10418289	PFS	0.992076	0.992054	1.00132	Higher meth.	4323
LIHC	MMP14	cg10418289	DSS	0.385802	0.387097	0.823753	Lower meth.	4323
LIHC	MMP14	cg10418289	DFI	0.563924	0.56358	1.10119	Higher meth.	4323
LIHC	MMP2	cg26795346	OS	0.752951	0.752903	0.94642	Lower meth.	4313
LIHC	MMP2	cg26795346	PFS	0.236184	0.236322	0.854177	Lower meth.	4313
LIHC	MMP2	cg26795346	DSS	0.650306	0.64984	0.902662	Lower meth.	4313
LIHC	MMP2	cg26795346	DFI	0.150599	0.151148	0.786954	Lower meth.	4313
LIHC	MMP3	cg18113270	OS	0.968991	0.968675	1.00687	Higher meth.	4314
LIHC	MMP3	cg18113270	PFS	0.689337	0.688818	0.948298	Lower meth.	4314
LIHC	MMP3	cg18113270	DSS	0.707198	0.70669	0.918861	Lower meth.	4314
LIHC	MMP3	cg18113270	DFI	0.368353	0.368602	0.860963	Lower meth.	4314
LIHC	MMP9	cg15876464	OS	0.972787	0.971812	0.993847	Lower meth.	4318
LIHC	MMP9	cg15876464	PFS	0.688327	0.689038	0.948538	Lower meth.	4318
LIHC	MMP9	cg15876464	DSS	0.377495	0.377844	0.819015	Lower meth.	4318
LIHC	MMP9	cg15876464	DFI	0.647711	0.648164	0.927406	Lower meth.	4318
LIHC	PECAM1	cg00427260	OS	0.0533198	0.0545715	1.40315	Higher meth.	5175
LIHC	PECAM1	cg00427260	PFS	0.0543923	0.0549005	1.29008	Higher meth.	5175
LIHC	PECAM1	cg00427260	DSS	0.0661112	0.0682385	1.50768	Higher meth.	5175
LIHC	PECAM1	cg00427260	DFI	0.224609	0.225378	1.2226	Higher meth.	5175
LIHC	SERPINE1	cg02273392	OS	0.286671	0.287359	0.829572	Lower meth.	5054
LIHC	SERPINE1	cg02273392	PFS	0.319918	0.319244	0.876414	Lower meth.	5054
LIHC	SERPINE1	cg02273392	DSS	0.276239	0.277518	0.782238	Lower meth.	5054
LIHC	SERPINE1	cg02273392	DFI	0.355726	0.355549	0.857994	Lower meth.	5054
LIHC	SPP1	cg15460348	OS	0.0605472	0.0616835	0.720543	Lower meth.	6696
LIHC	SPP1	cg15460348	PFS	0.049763	0.0502673	0.771729	Lower meth.	6696
LIHC	SPP1	cg15460348	DSS	0.965589	0.964921	1.00997	Higher meth.	6696
LIHC	SPP1	cg15460348	DFI	0.550611	0.550215	0.906065	Lower meth.	6696
LIHC	TIMP2	cg05306745	OS	0.365931	0.3666	1.17097	Higher meth.	7077
LIHC	TIMP2	cg05306745	PFS	0.122202	0.122758	1.22746	Higher meth.	7077
LIHC	TIMP2	cg05306745	DSS	0.660442	0.660178	0.904997	Lower meth.	7077
LIHC	TIMP2	cg05306745	DFI	0.30712	0.307767	1.1846	Higher meth.	7077
LIHC	TNF	cg21370522	OS	0.928387	0.929574	1.01553	Higher meth.	7124
LIHC	TNF	cg21370522	PFS	0.382176	0.382888	1.12229	Higher meth.	7124
LIHC	TNF	cg21370522	DSS	0.902451	0.901448	0.972587	Lower meth.	7124
LIHC	TNF	cg21370522	DFI	0.345289	0.346119	1.16876	Higher meth.	7124
LIHC	TNFRSF11B	cg12057741	OS	0.168553	0.169891	0.786234	Lower meth.	4982
LIHC	TNFRSF11B	cg12057741	PFS	0.411999	0.412327	0.897286	Lower meth.	4982
LIHC	TNFRSF11B	cg12057741	DSS	0.227917	0.2299	0.762509	Lower meth.	4982
LIHC	TNFRSF11B	cg12057741	DFI	0.348044	0.348919	0.856476	Lower meth.	4982
LUAD	FGF2	cg24683623	OS	0.657125	0.656784	0.932197	Lower meth.	2247
LUAD	FGF2	cg24683623	PFS	0.946551	0.946813	0.99123	Lower meth.	2247
LUAD	FGF2	cg24683623	DSS	0.853186	0.85405	1.03755	Higher meth.	2247
LUAD	FGF2	cg24683623	DFI	0.74682	0.747078	1.07671	Higher meth.	2247
LUAD	ICAM1	cg02776148	OS	0.657154	0.657499	1.07261	Higher meth.	3383
LUAD	ICAM1	cg02776148	PFS	0.189829	0.190348	1.18937	Higher meth.	3383
LUAD	ICAM1	cg02776148	DSS	0.970743	0.969947	0.992487	Lower meth.	3383
LUAD	ICAM1	cg02776148	DFI	0.515119	0.515234	1.16259	Higher meth.	3383
LUAD	ICAM3	cg14145194	OS	0.228315	0.229073	1.21105	Higher meth.	3385
LUAD	ICAM3	cg14145194	PFS	0.466279	0.466441	1.1013	Higher meth.	3385
LUAD	ICAM3	cg14145194	DSS	0.814704	0.814732	1.04808	Higher meth.	3385
LUAD	ICAM3	cg14145194	DFI	0.377257	0.377811	0.816074	Lower meth.	3385
LUAD	ITGA2	cg15676241	OS	0.3166	0.317045	0.853603	Lower meth.	3673
LUAD	ITGA2	cg15676241	PFS	0.513982	0.514328	0.917407	Lower meth.	3673
LUAD	ITGA2	cg15676241	DSS	0.430289	0.430782	0.853936	Lower meth.	3673
LUAD	ITGA2	cg15676241	DFI	0.579165	0.579146	1.1371	Higher meth.	3673
LUAD	LCP1	cg04341806	OS	0.103583	0.104502	1.29496	Higher meth.	3936
LUAD	LCP1	cg04341806	PFS	0.0234195	0.023891	1.34985	Higher meth.	3936
LUAD	LCP1	cg04341806	DSS	0.317293	0.317948	1.22169	Higher meth.	3936
LUAD	LCP1	cg04341806	DFI	0.317388	0.318853	1.25767	Higher meth.	3936
LUAD	MMP1	cg16575408	OS	0.306665	0.307063	0.850469	Lower meth.	4312
LUAD	MMP1	cg16575408	PFS	0.179172	0.179904	0.836975	Lower meth.	4312
LUAD	MMP1	cg16575408	DSS	0.485145	0.485523	0.869287	Lower meth.	4312
LUAD	MMP1	cg16575408	DFI	0.453825	0.454142	0.842267	Lower meth.	4312
LUAD	MMP10	cg02061229	OS	0.739348	0.739486	0.948856	Lower meth.	4319
LUAD	MMP10	cg02061229	PFS	0.471718	0.471778	0.90912	Lower meth.	4319
LUAD	MMP10	cg02061229	DSS	0.813085	0.813915	0.953902	Lower meth.	4319
LUAD	MMP10	cg02061229	DFI	0.82404	0.824106	1.05215	Higher meth.	4319
LUAD	MMP12	cg20487452	OS	0.0781727	0.0793356	0.755476	Lower meth.	4321
LUAD	MMP12	cg20487452	PFS	0.00437046	0.0046168	0.685559	Lower meth.	4321
LUAD	MMP12	cg20487452	DSS	0.0413721	0.0429443	0.662403	Lower meth.	4321
LUAD	MMP12	cg20487452	DFI	0.0182269	0.0196308	0.583485	Lower meth.	4321
LUAD	MMP13	cg10085326	OS	0.382067	0.382354	0.870926	Lower meth.	4322
LUAD	MMP13	cg10085326	PFS	0.624933	0.624618	0.937424	Lower meth.	4322
LUAD	MMP13	cg10085326	DSS	0.401869	0.402248	0.845632	Lower meth.	4322
LUAD	MMP13	cg10085326	DFI	0.657093	0.656826	0.903421	Lower meth.	4322
LUAD	MMP14	cg10418289	OS	0.105072	0.105947	0.774056	Lower meth.	4323
LUAD	MMP14	cg10418289	PFS	0.523959	0.523078	0.91874	Lower meth.	4323
LUAD	MMP14	cg10418289	DSS	0.581781	0.581881	0.895328	Lower meth.	4323
LUAD	MMP14	cg10418289	DFI	0.614155	0.613835	0.890723	Lower meth.	4323
LUAD	MMP2	cg04049508	OS	0.974515	0.974436	1.00507	Higher meth.	4313
LUAD	MMP2	cg04049508	PFS	0.983647	0.984413	0.99742	Lower meth.	4313
LUAD	MMP2	cg04049508	DSS	0.66056	0.661435	0.915797	Lower meth.	4313
LUAD	MMP2	cg04049508	DFI	0.251842	0.253088	1.30091	Higher meth.	4313
LUAD	MMP3	cg16466334	OS	0.0816821	0.0826142	0.759077	Lower meth.	4314
LUAD	MMP3	cg16466334	PFS	0.00412114	0.00434364	0.684641	Lower meth.	4314
LUAD	MMP3	cg16466334	DSS	0.0699016	0.0713299	0.694586	Lower meth.	4314
LUAD	MMP3	cg16466334	DFI	0.00348395	0.00411506	0.512615	Lower meth.	4314
LUAD	MMP9	cg12071656	OS	0.943279	0.944274	1.01117	Higher meth.	4318
LUAD	MMP9	cg12071656	PFS	0.510203	0.510406	1.09173	Higher meth.	4318
LUAD	MMP9	cg12071656	DSS	0.681308	0.682039	1.08624	Higher meth.	4318
LUAD	MMP9	cg12071656	DFI	0.889999	0.890514	0.968811	Lower meth.	4318
LUAD	PECAM1	cg02459519	OS	0.772785	0.772736	1.0468	Higher meth.	5175
LUAD	PECAM1	cg02459519	PFS	0.206704	0.207235	1.18232	Higher meth.	5175
LUAD	PECAM1	cg02459519	DSS	0.977999	0.978197	0.994542	Lower meth.	5175
LUAD	PECAM1	cg02459519	DFI	0.572035	0.572389	0.878578	Lower meth.	5175
LUAD	SERPINE1	cg17968347	OS	0.0746892	0.0756994	1.32529	Higher meth.	5054
LUAD	SERPINE1	cg17968347	PFS	0.418604	0.419094	1.11258	Higher meth.	5054
LUAD	SERPINE1	cg17968347	DSS	0.201791	0.203279	1.29077	Higher meth.	5054
LUAD	SERPINE1	cg17968347	DFI	0.91389	0.914029	1.02496	Higher meth.	5054
LUAD	SPP1	cg20261167	OS	0.89813	0.897082	0.979788	Lower meth.	6696
LUAD	SPP1	cg20261167	PFS	0.985074	0.985356	0.997579	Lower meth.	6696
LUAD	SPP1	cg20261167	DSS	0.914505	0.913819	0.978507	Lower meth.	6696
LUAD	SPP1	cg20261167	DFI	0.253592	0.25482	1.30018	Higher meth.	6696
LUAD	TIMP2	cg00863893	OS	0.122068	0.123164	1.27617	Higher meth.	7077
LUAD	TIMP2	cg00863893	PFS	0.198567	0.199329	1.18466	Higher meth.	7077
LUAD	TIMP2	cg00863893	DSS	0.206149	0.207856	1.28734	Higher meth.	7077
LUAD	TIMP2	cg00863893	DFI	0.87118	0.87171	1.03755	Higher meth.	7077
LUAD	TNF	cg02137984	OS	0.167526	0.168428	1.24457	Higher meth.	7124
LUAD	TNF	cg02137984	PFS	0.20584	0.206408	1.1821	Higher meth.	7124
LUAD	TNF	cg02137984	DSS	0.204237	0.205732	1.29028	Higher meth.	7124
LUAD	TNF	cg02137984	DFI	0.950604	0.949273	0.985525	Lower meth.	7124
LUAD	TNFRSF11B	cg17171407	OS	0.0105547	0.0111126	1.49774	Higher meth.	4982
LUAD	TNFRSF11B	cg17171407	PFS	0.00363617	0.0038247	1.46849	Higher meth.	4982
LUAD	TNFRSF11B	cg17171407	DSS	0.029617	0.0309727	1.54583	Higher meth.	4982
LUAD	TNFRSF11B	cg17171407	DFI	0.079586	0.0814171	1.49217	Higher meth.	4982
LUSC	FGF2	cg14887335	OS	0.711179	0.711403	0.941967	Lower meth.	2247
LUSC	FGF2	cg14887335	PFS	0.672707	0.671667	0.939924	Lower meth.	2247
LUSC	FGF2	cg14887335	DSS	0.849831	0.849843	1.04814	Higher meth.	2247
LUSC	FGF2	cg14887335	DFI	0.116719	0.120045	1.56179	Higher meth.	2247
LUSC	ICAM1	cg26549174	OS	0.482044	0.481913	0.892715	Lower meth.	3383
LUSC	ICAM1	cg26549174	PFS	0.217817	0.218284	0.835772	Lower meth.	3383
LUSC	ICAM1	cg26549174	DSS	0.446758	0.44713	0.827927	Lower meth.	3383
LUSC	ICAM1	cg26549174	DFI	0.327672	0.329257	0.763828	Lower meth.	3383
LUSC	ICAM3	cg14145194	OS	0.858941	0.859446	1.02901	Higher meth.	3385
LUSC	ICAM3	cg14145194	PFS	0.511224	0.510875	0.908565	Lower meth.	3385
LUSC	ICAM3	cg14145194	DSS	0.340606	0.341762	1.26789	Higher meth.	3385
LUSC	ICAM3	cg14145194	DFI	0.447504	0.448941	1.2328	Higher meth.	3385
LUSC	ITGA2	cg15676241	OS	0.14564	0.14645	1.26483	Higher meth.	3673
LUSC	ITGA2	cg15676241	PFS	0.132608	0.133474	1.24546	Higher meth.	3673
LUSC	ITGA2	cg15676241	DSS	0.0458355	0.048071	1.65087	Higher meth.	3673
LUSC	ITGA2	cg15676241	DFI	0.368638	0.370396	1.2796	Higher meth.	3673
LUSC	LCP1	cg04341806	OS	0.599808	0.599465	1.08848	Higher meth.	3936
LUSC	LCP1	cg04341806	PFS	0.948594	0.948479	0.990619	Lower meth.	3936
LUSC	LCP1	cg04341806	DSS	0.104512	0.106808	1.50095	Higher meth.	3936
LUSC	LCP1	cg04341806	DFI	0.661891	0.662115	1.12767	Higher meth.	3936
LUSC	MMP1	cg16575408	OS	0.630149	0.63	0.925059	Lower meth.	4312
LUSC	MMP1	cg16575408	PFS	0.985097	0.985935	1.00258	Higher meth.	4312
LUSC	MMP1	cg16575408	DSS	0.281267	0.282927	0.764817	Lower meth.	4312
LUSC	MMP1	cg16575408	DFI	0.337446	0.339032	1.30839	Higher meth.	4312
LUSC	MMP10	cg02061229	OS	0.862656	0.861412	1.02858	Higher meth.	4319
LUSC	MMP10	cg02061229	PFS	0.545124	0.545127	1.09244	Higher meth.	4319
LUSC	MMP10	cg02061229	DSS	0.855536	0.855939	0.955874	Lower meth.	4319
LUSC	MMP10	cg02061229	DFI	0.538386	0.538893	0.844229	Lower meth.	4319
LUSC	MMP12	cg09002726	OS	0.949461	0.948852	1.01052	Higher meth.	4321
LUSC	MMP12	cg09002726	PFS	0.537552	0.537678	1.09451	Higher meth.	4321
LUSC	MMP12	cg09002726	DSS	0.836443	0.836445	1.05277	Higher meth.	4321
LUSC	MMP12	cg09002726	DFI	0.193698	0.195779	1.42974	Higher meth.	4321
LUSC	MMP13	cg19710916	OS	0.443041	0.443289	1.13256	Higher meth.	4322
LUSC	MMP13	cg19710916	PFS	0.248528	0.248913	1.18446	Higher meth.	4322
LUSC	MMP13	cg19710916	DSS	0.321948	0.322947	1.28031	Higher meth.	4322
LUSC	MMP13	cg19710916	DFI	0.0693236	0.0721481	1.65321	Higher meth.	4322
LUSC	MMP14	cg18207699	OS	0.638249	0.638236	1.07924	Higher meth.	4323
LUSC	MMP14	cg18207699	PFS	0.789725	0.790201	1.0396	Higher meth.	4323
LUSC	MMP14	cg18207699	DSS	0.497544	0.497733	1.18395	Higher meth.	4323
LUSC	MMP14	cg18207699	DFI	0.0286325	0.0311159	1.85668	Higher meth.	4323
LUSC	MMP2	cg00087906	OS	0.705865	0.706377	0.940715	Lower meth.	4313
LUSC	MMP2	cg00087906	PFS	0.706064	0.706084	0.946414	Lower meth.	4313
LUSC	MMP2	cg00087906	DSS	0.388942	0.390151	0.805817	Lower meth.	4313
LUSC	MMP2	cg00087906	DFI	0.986903	0.98696	1.00451	Higher meth.	4313
LUSC	MMP3	cg16466334	OS	0.557848	0.557728	0.909351	Lower meth.	4314
LUSC	MMP3	cg16466334	PFS	0.691186	0.690468	0.943453	Lower meth.	4314
LUSC	MMP3	cg16466334	DSS	0.607227	0.607489	0.880083	Lower meth.	4314
LUSC	MMP3	cg16466334	DFI	0.0199311	0.0223176	1.96107	Higher meth.	4314
LUSC	MMP9	cg00732815	OS	0.902301	0.901721	1.0202	Higher meth.	4318
LUSC	MMP9	cg00732815	PFS	0.713049	0.711722	0.947376	Lower meth.	4318
LUSC	MMP9	cg00732815	DSS	0.673358	0.673523	1.11071	Higher meth.	4318
LUSC	MMP9	cg00732815	DFI	0.775276	0.774042	0.923986	Lower meth.	4318
LUSC	PECAM1	cg00427260	OS	0.353638	0.354024	1.16248	Higher meth.	5175
LUSC	PECAM1	cg00427260	PFS	0.367428	0.367954	1.14077	Higher meth.	5175
LUSC	PECAM1	cg00427260	DSS	0.0838198	0.0862521	1.54687	Higher meth.	5175
LUSC	PECAM1	cg00427260	DFI	0.10673	0.109513	1.56397	Higher meth.	5175
LUSC	SERPINE1	cg08053846	OS	0.353074	0.353496	0.860831	Lower meth.	5054
LUSC	SERPINE1	cg08053846	PFS	0.0992466	0.0998853	0.786316	Lower meth.	5054
LUSC	SERPINE1	cg08053846	DSS	0.739601	0.740072	0.920766	Lower meth.	5054
LUSC	SERPINE1	cg08053846	DFI	0.87838	0.878425	0.95877	Lower meth.	5054
LUSC	SPP1	cg20261167	OS	0.101339	0.10218	1.30367	Higher meth.	6696
LUSC	SPP1	cg20261167	PFS	0.221757	0.22285	1.1954	Higher meth.	6696
LUSC	SPP1	cg20261167	DSS	0.016731	0.0184078	1.83758	Higher meth.	6696
LUSC	SPP1	cg20261167	DFI	0.697592	0.698463	1.1129	Higher meth.	6696
LUSC	TIMP2	cg13694343	OS	0.504165	0.504413	0.897854	Lower meth.	7077
LUSC	TIMP2	cg13694343	PFS	0.244606	0.244772	0.84409	Lower meth.	7077
LUSC	TIMP2	cg13694343	DSS	0.918944	0.918535	1.02577	Higher meth.	7077
LUSC	TIMP2	cg13694343	DFI	0.573172	0.57364	1.16813	Higher meth.	7077
LUSC	TNF	cg01360627	OS	0.43636	0.436726	1.13385	Higher meth.	7124
LUSC	TNF	cg01360627	PFS	0.862285	0.862647	1.02558	Higher meth.	7124
LUSC	TNF	cg01360627	DSS	0.408004	0.408832	1.2277	Higher meth.	7124
LUSC	TNF	cg01360627	DFI	0.536595	0.537063	1.18513	Higher meth.	7124
LUSC	TNFRSF11B	cg19620294	OS	0.780312	0.779962	1.04616	Higher meth.	4982
LUSC	TNFRSF11B	cg19620294	PFS	0.68574	0.684753	0.942456	Lower meth.	4982
LUSC	TNFRSF11B	cg19620294	DSS	0.444995	0.445702	1.20924	Higher meth.	4982
LUSC	TNFRSF11B	cg19620294	DFI	0.647029	0.647946	1.13399	Higher meth.	4982
MESO	FGF2	cg12632152	OS	0.805738	0.80562	0.94333	Lower meth.	2247
MESO	FGF2	cg12632152	PFS	0.815735	0.814675	1.0555	Higher meth.	2247
MESO	FGF2	cg12632152	DSS	0.428036	0.427544	0.78369	Lower meth.	2247
MESO	FGF2	cg12632152	DFI	0.125528	0.999162	9.49191e+08	Higher meth.	2247
MESO	ICAM1	cg20036207	OS	0.610727	0.612408	0.885679	Lower meth.	3383
MESO	ICAM1	cg20036207	PFS	0.706597	0.709637	0.916641	Lower meth.	3383
MESO	ICAM1	cg20036207	DSS	0.826133	0.82858	0.935939	Lower meth.	3383
MESO	ICAM1	cg20036207	DFI	0.518551	0.523013	0.58902	Lower meth.	3383
MESO	ICAM3	cg14145194	OS	0.500167	0.503284	1.17296	Higher meth.	3385
MESO	ICAM3	cg14145194	PFS	0.189438	0.191184	1.35049	Higher meth.	3385
MESO	ICAM3	cg14145194	DSS	0.951442	0.949069	0.980572	Lower meth.	3385
MESO	ICAM3	cg14145194	DFI	0.568544	0.573958	0.529976	Lower meth.	3385
MESO	ITGA2	cg15676241	OS	0.844903	0.844782	1.04738	Higher meth.	3673
MESO	ITGA2	cg15676241	PFS	0.0953434	0.096739	1.4638	Higher meth.	3673
MESO	ITGA2	cg15676241	DSS	0.787385	0.784681	0.918737	Lower meth.	3673
MESO	ITGA2	cg15676241	DFI	0.12284	0.160665	4.87476	Higher meth.	3673
MESO	LCP1	cg17771150	OS	0.192072	0.192675	0.732245	Lower meth.	3936
MESO	LCP1	cg17771150	PFS	0.922215	0.92391	0.978216	Lower meth.	3936
MESO	LCP1	cg17771150	DSS	0.110146	0.112927	0.609042	Lower meth.	3936
MESO	LCP1	cg17771150	DFI	0.568544	0.573958	0.529976	Lower meth.	3936
MESO	MMP1	cg14543953	OS	0.533844	0.534041	0.862033	Lower meth.	4312
MESO	MMP1	cg14543953	PFS	0.852257	0.852221	1.04415	Higher meth.	4312
MESO	MMP1	cg14543953	DSS	0.42056	0.423774	0.77844	Lower meth.	4312
MESO	MMP1	cg14543953	DFI	0.757936	0.759142	0.700254	Lower meth.	4312
MESO	MMP10	cg00347729	OS	0.575136	0.571812	1.14385	Higher meth.	4319
MESO	MMP10	cg00347729	PFS	0.486774	0.487593	0.851803	Lower meth.	4319
MESO	MMP10	cg00347729	DSS	0.261562	0.262576	1.41088	Higher meth.	4319
MESO	MMP12	cg20487452	OS	0.711873	0.710733	0.91566	Lower meth.	4321
MESO	MMP12	cg20487452	PFS	0.991748	0.988637	0.996747	Lower meth.	4321
MESO	MMP12	cg20487452	DSS	0.559776	0.560143	1.19812	Higher meth.	4321
MESO	MMP12	cg20487452	DFI	0.153096	0.17778	0.286206	Lower meth.	4321
MESO	MMP13	cg22658979	OS	0.298423	0.298082	0.781816	Lower meth.	4322
MESO	MMP13	cg22658979	PFS	0.188321	0.188981	0.735199	Lower meth.	4322
MESO	MMP13	cg22658979	DSS	0.492035	0.492946	0.810459	Lower meth.	4322
MESO	MMP13	cg22658979	DFI	0.779412	0.779862	0.794433	Lower meth.	4322
MESO	MMP14	cg18207699	OS	0.402975	0.403589	0.820421	Lower meth.	4323
MESO	MMP14	cg18207699	PFS	0.264204	0.266476	0.774235	Lower meth.	4323
MESO	MMP14	cg18207699	DSS	0.373731	0.377018	0.76118	Lower meth.	4323
MESO	MMP14	cg18207699	DFI	0.757936	0.759142	1.42805	Higher meth.	4323
MESO	MMP2	cg09350341	OS	0.979151	0.976293	1.00704	Higher meth.	4313
MESO	MMP2	cg09350341	PFS	0.64785	0.648101	0.90086	Lower meth.	4313
MESO	MMP2	cg09350341	DSS	0.557517	0.556313	1.19897	Higher meth.	4313
MESO	MMP2	cg09350341	DFI	0.186525	0.21437	0.28578	Lower meth.	4313
MESO	MMP3	cg16466334	OS	0.0703986	0.0723254	0.648588	Lower meth.	4314
MESO	MMP3	cg16466334	PFS	0.338766	0.33895	0.801372	Lower meth.	4314
MESO	MMP3	cg16466334	DSS	0.30935	0.310106	0.729781	Lower meth.	4314
MESO	MMP3	cg16466334	DFI	0.449878	0.46473	0.407329	Lower meth.	4314
MESO	MMP9	cg00732815	OS	0.132416	0.134936	0.697634	Lower meth.	4318
MESO	MMP9	cg00732815	PFS	0.416589	0.418533	0.829924	Lower meth.	4318
MESO	MMP9	cg00732815	DSS	0.553792	0.554412	0.832659	Lower meth.	4318
MESO	MMP9	cg00732815	DFI	0.568544	0.573958	1.88688	Higher meth.	4318
MESO	PECAM1	cg00427260	OS	0.276909	0.276849	0.772195	Lower meth.	5175
MESO	PECAM1	cg00427260	PFS	0.757474	0.757343	1.074	Higher meth.	5175
MESO	PECAM1	cg00427260	DSS	0.347583	0.347927	0.748915	Lower meth.	5175
MESO	PECAM1	cg00427260	DFI	0.0405175	0.999091	6.33214e-10	Lower meth.	5175
MESO	SERPINE1	cg02704552	OS	0.0320941	0.0338106	0.601831	Lower meth.	5054
MESO	SERPINE1	cg02704552	PFS	0.0394706	0.0412192	0.617796	Lower meth.	5054
MESO	SERPINE1	cg02704552	DSS	0.0390625	0.0424065	0.527323	Lower meth.	5054
MESO	SERPINE1	cg02704552	DFI	0.0405175	0.999091	6.33214e-10	Lower meth.	5054
MESO	SPP1	cg15460348	OS	0.030476	0.03202	0.594726	Lower meth.	6696
MESO	SPP1	cg15460348	PFS	0.208275	0.210028	0.749696	Lower meth.	6696
MESO	SPP1	cg15460348	DSS	0.142278	0.145621	0.635241	Lower meth.	6696
MESO	TIMP2	cg27549186	OS	0.476085	0.478312	0.843449	Lower meth.	7077
MESO	TIMP2	cg27549186	PFS	0.191626	0.193459	0.736712	Lower meth.	7077
MESO	TIMP2	cg27549186	DSS	0.97719	0.977201	1.0088	Higher meth.	7077
MESO	TIMP2	cg27549186	DFI	0.568544	0.573958	1.88688	Higher meth.	7077
MESO	TNF	cg26729380	OS	0.539163	0.53827	0.864521	Lower meth.	7124
MESO	TNF	cg26729380	PFS	0.660774	0.660834	1.1066	Higher meth.	7124
MESO	TNF	cg26729380	DSS	0.505638	0.50639	0.815074	Lower meth.	7124
MESO	TNF	cg26729380	DFI	0.138869	0.176911	0.204782	Lower meth.	7124
MESO	TNFRSF11B	cg17171407	OS	0.0669263	0.0691469	0.648639	Lower meth.	4982
MESO	TNFRSF11B	cg17171407	PFS	0.292911	0.294334	0.78155	Lower meth.	4982
MESO	TNFRSF11B	cg17171407	DSS	0.294486	0.296533	0.725613	Lower meth.	4982
MESO	TNFRSF11B	cg17171407	DFI	0.354853	0.367847	0.436638	Lower meth.	4982
OV	FGF2	cg09108314	OS	0.439951	0.448654	2.00991	Higher meth.	2247
OV	FGF2	cg09108314	PFS	0.727944	0.728789	1.33024	Higher meth.	2247
OV	FGF2	cg09108314	DSS	0.439951	0.448654	2.00991	Higher meth.	2247
OV	FGF2	cg09108314	DFI	0.757111	0.75845	0.683916	Lower meth.	2247
OV	ICAM1	cg00500176	OS	0.724682	0.725764	1.38205	Higher meth.	3383
OV	ICAM1	cg00500176	PFS	0.356163	0.368162	2.18295	Higher meth.	3383
OV	ICAM1	cg00500176	DSS	0.724682	0.725764	1.38205	Higher meth.	3383
OV	ICAM1	cg00500176	DFI	0.507917	0.518724	2.20783	Higher meth.	3383
OV	ICAM3	cg14145194	OS	0.439951	0.448654	0.497534	Lower meth.	3385
OV	ICAM3	cg14145194	PFS	0.727944	0.728789	0.751745	Lower meth.	3385
OV	ICAM3	cg14145194	DSS	0.439951	0.448654	0.497534	Lower meth.	3385
OV	ICAM3	cg14145194	DFI	0.757111	0.75845	1.46217	Higher meth.	3385
OV	ITGA2	cg08874888	OS	0.144524	0.181124	4.52347	Higher meth.	3673
OV	ITGA2	cg08874888	PFS	0.126751	0.164588	4.79508	Higher meth.	3673
OV	ITGA2	cg08874888	DSS	0.144524	0.181124	4.52347	Higher meth.	3673
OV	ITGA2	cg08874888	DFI	0.0700626	0.999423	3.03615e+09	Higher meth.	3673
OV	LCP1	cg17771150	OS	0.0493902	0.999273	4.59061e-10	Lower meth.	3936
OV	LCP1	cg17771150	PFS	0.47134	0.478767	0.521145	Lower meth.	3936
OV	LCP1	cg17771150	DSS	0.0493902	0.999273	4.59061e-10	Lower meth.	3936
OV	LCP1	cg17771150	DFI	0.343067	0.999479	8.96009e+08	Higher meth.	3936
OV	MMP1	cg14543953	OS	0.579942	0.583689	0.602682	Lower meth.	4312
OV	MMP1	cg14543953	PFS	0.328407	0.341433	0.435034	Lower meth.	4312
OV	MMP1	cg14543953	DSS	0.579942	0.583689	0.602682	Lower meth.	4312
OV	MMP1	cg14543953	DFI	0.383427	0.40311	0.355834	Lower meth.	4312
OV	MMP10	cg02061229	OS	0.927479	0.927499	0.919015	Lower meth.	4319
OV	MMP10	cg02061229	PFS	0.405561	0.415133	2.02885	Higher meth.	4319
OV	MMP10	cg02061229	DSS	0.927479	0.927499	0.919015	Lower meth.	4319
OV	MMP10	cg02061229	DFI	0.0978815	0.999276	1.49059e+09	Higher meth.	4319
OV	MMP12	cg20487452	OS	0.0112223	0.999178	3.21313e-10	Lower meth.	4321
OV	MMP12	cg20487452	PFS	0.0315724	0.0638557	0.118423	Lower meth.	4321
OV	MMP12	cg20487452	DSS	0.0112223	0.999178	3.21313e-10	Lower meth.	4321
OV	MMP12	cg20487452	DFI	0.349746	0.379001	0.282843	Lower meth.	4321
OV	MMP13	cg07048132	OS	0.979394	0.979395	0.976221	Lower meth.	4322
OV	MMP13	cg07048132	PFS	0.474752	0.4815	0.543047	Lower meth.	4322
OV	MMP13	cg07048132	DSS	0.979394	0.979395	0.976221	Lower meth.	4322
OV	MMP13	cg07048132	DFI	0.0978815	0.999276	6.70876e-10	Lower meth.	4322
OV	MMP14	cg26433554	OS	0.927479	0.927499	1.08812	Higher meth.	4323
OV	MMP14	cg26433554	PFS	0.405561	0.415133	0.49289	Lower meth.	4323
OV	MMP14	cg26433554	DSS	0.927479	0.927499	1.08812	Higher meth.	4323
OV	MMP14	cg26433554	DFI	0.0978815	0.999276	6.70876e-10	Lower meth.	4323
OV	MMP2	cg22950163	OS	0.979394	0.979395	1.02436	Higher meth.	4313
OV	MMP2	cg22950163	PFS	0.917196	0.917221	0.918494	Lower meth.	4313
OV	MMP2	cg22950163	DSS	0.979394	0.979395	1.02436	Higher meth.	4313
OV	MMP2	cg22950163	DFI	0.619497	0.62465	1.82288	Higher meth.	4313
OV	MMP3	cg09615874	OS	0.639477	0.641817	0.649195	Lower meth.	4314
OV	MMP3	cg09615874	PFS	0.989631	0.989631	1.0107	Higher meth.	4314
OV	MMP3	cg09615874	DSS	0.639477	0.641817	0.649195	Lower meth.	4314
OV	MMP3	cg09615874	DFI	0.619497	0.62465	1.82288	Higher meth.	4314
OV	MMP9	cg00732815	OS	0.304332	0.319756	2.51935	Higher meth.	4318
OV	MMP9	cg00732815	PFS	0.808244	0.808542	1.22061	Higher meth.	4318
OV	MMP9	cg00732815	DSS	0.304332	0.319756	2.51935	Higher meth.	4318
OV	MMP9	cg00732815	DFI	0.173593	0.999323	8.70722e-10	Lower meth.	4318
OV	PECAM1	cg02459519	OS	0.304332	0.319756	2.51935	Higher meth.	5175
OV	PECAM1	cg02459519	PFS	0.284999	0.30057	2.46732	Higher meth.	5175
OV	PECAM1	cg02459519	DSS	0.304332	0.319756	2.51935	Higher meth.	5175
OV	PECAM1	cg02459519	DFI	0.8849	0.885039	0.835067	Lower meth.	5175
OV	SERPINE1	cg15874872	OS	0.289614	0.313257	0.317994	Lower meth.	5054
OV	SERPINE1	cg02273392	OS	0.724682	0.725764	0.723561	Lower meth.	5054
OV	SERPINE1	cg15874872	PFS	0.188123	0.208795	0.331847	Lower meth.	5054
OV	SERPINE1	cg02273392	PFS	0.356163	0.368162	0.458095	Lower meth.	5054
OV	SERPINE1	cg15874872	DSS	0.289614	0.313257	0.317994	Lower meth.	5054
OV	SERPINE1	cg02273392	DSS	0.724682	0.725764	0.723561	Lower meth.	5054
OV	SERPINE1	cg15874872	DFI	0.383427	0.40311	0.355834	Lower meth.	5054
OV	SERPINE1	cg02273392	DFI	0.507917	0.518724	0.452934	Lower meth.	5054
OV	SPP1	cg20261167	OS	0.144524	0.181124	0.221069	Lower meth.	6696
OV	SPP1	cg20261167	PFS	0.126751	0.164588	0.208547	Lower meth.	6696
OV	SPP1	cg20261167	DSS	0.144524	0.181124	0.221069	Lower meth.	6696
OV	SPP1	cg20261167	DFI	0.0700626	0.999423	3.29365e-10	Lower meth.	6696
OV	TIMP2	cg15981475	OS	0.579942	0.583689	1.65925	Higher meth.	7077
OV	TIMP2	cg15981475	PFS	0.880084	0.880156	1.13247	Higher meth.	7077
OV	TIMP2	cg15981475	DSS	0.579942	0.583689	1.65925	Higher meth.	7077
OV	TIMP2	cg15981475	DFI	0.757111	0.75845	0.683916	Lower meth.	7077
OV	TNF	cg02137984	OS	0.579942	0.583689	0.602682	Lower meth.	7124
OV	TNF	cg02137984	PFS	0.880084	0.880156	0.883025	Lower meth.	7124
OV	TNF	cg02137984	DSS	0.579942	0.583689	0.602682	Lower meth.	7124
OV	TNF	cg02137984	DFI	0.757111	0.75845	1.46217	Higher meth.	7124
OV	TNFRSF11B	cg17293641	OS	0.513047	0.518883	0.551996	Lower meth.	4982
OV	TNFRSF11B	cg17293641	PFS	0.188123	0.208795	0.331847	Lower meth.	4982
OV	TNFRSF11B	cg17293641	DSS	0.513047	0.518883	0.551996	Lower meth.	4982
OV	TNFRSF11B	cg17293641	DFI	0.383427	0.40311	0.355834	Lower meth.	4982
PAAD	FGF2	cg03737475	OS	0.314887	0.315518	0.815697	Lower meth.	2247
PAAD	FGF2	cg03737475	PFS	0.0775186	0.0779539	0.730225	Lower meth.	2247
PAAD	FGF2	cg03737475	DSS	0.498048	0.49853	0.85711	Lower meth.	2247
PAAD	FGF2	cg03737475	DFI	0.499263	0.50071	1.33529	Higher meth.	2247
PAAD	ICAM1	cg26549174	OS	0.0823112	0.0837352	0.703467	Lower meth.	3383
PAAD	ICAM1	cg26549174	PFS	0.0415356	0.0429767	0.695665	Lower meth.	3383
PAAD	ICAM1	cg26549174	DSS	0.0204187	0.0218155	0.591469	Lower meth.	3383
PAAD	ICAM1	cg26549174	DFI	0.791572	0.791675	0.894304	Lower meth.	3383
PAAD	ICAM3	cg05323251	OS	0.957071	0.957856	1.01071	Higher meth.	3385
PAAD	ICAM3	cg05323251	PFS	0.751052	0.753829	0.945597	Lower meth.	3385
PAAD	ICAM3	cg05323251	DSS	0.407122	0.406931	0.827885	Lower meth.	3385
PAAD	ICAM3	cg05323251	DFI	0.58866	0.589436	1.25722	Higher meth.	3385
PAAD	ITGA2	cg04996689	OS	0.120837	0.122231	1.37086	Higher meth.	3673
PAAD	ITGA2	cg04996689	PFS	0.0649188	0.06592	1.3942	Higher meth.	3673
PAAD	ITGA2	cg04996689	DSS	0.412263	0.412448	1.2051	Higher meth.	3673
PAAD	ITGA2	cg04996689	DFI	0.861114	0.861144	1.07675	Higher meth.	3673
PAAD	LCP1	cg17771150	OS	0.67069	0.671322	0.917492	Lower meth.	3936
PAAD	LCP1	cg17771150	PFS	0.264805	0.266472	0.820054	Lower meth.	3936
PAAD	LCP1	cg17771150	DSS	0.341084	0.342174	0.805708	Lower meth.	3936
PAAD	LCP1	cg17771150	DFI	0.823143	0.823207	1.10126	Higher meth.	3936
PAAD	MMP1	cg13759446	OS	0.340147	0.340659	1.2131	Higher meth.	4312
PAAD	MMP1	cg13759446	PFS	0.32635	0.325982	1.19082	Higher meth.	4312
PAAD	MMP1	cg13759446	DSS	0.589333	0.589591	1.13024	Higher meth.	4312
PAAD	MMP1	cg13759446	DFI	0.880701	0.880719	1.06536	Higher meth.	4312
PAAD	MMP10	cg02061229	OS	0.179917	0.180824	0.762435	Lower meth.	4319
PAAD	MMP10	cg02061229	PFS	0.118166	0.118694	0.756274	Lower meth.	4319
PAAD	MMP10	cg02061229	DSS	0.273053	0.273771	0.780049	Lower meth.	4319
PAAD	MMP10	cg02061229	DFI	0.443592	0.445543	1.41154	Higher meth.	4319
PAAD	MMP12	cg09002726	OS	0.411477	0.41216	1.17978	Higher meth.	4321
PAAD	MMP12	cg09002726	PFS	0.1174	0.119033	1.3206	Higher meth.	4321
PAAD	MMP12	cg09002726	DSS	0.49774	0.498254	1.16608	Higher meth.	4321
PAAD	MMP12	cg09002726	DFI	0.0129611	0.0177564	2.93666	Higher meth.	4321
PAAD	MMP13	cg10085326	OS	0.363346	0.36428	0.832465	Lower meth.	4322
PAAD	MMP13	cg10085326	PFS	0.178419	0.178197	0.786635	Lower meth.	4322
PAAD	MMP13	cg10085326	DSS	0.480827	0.481993	0.852575	Lower meth.	4322
PAAD	MMP13	cg10085326	DFI	0.551902	0.552921	0.778529	Lower meth.	4322
PAAD	MMP14	cg18207699	OS	0.721584	0.722287	0.930867	Lower meth.	4323
PAAD	MMP14	cg18207699	PFS	0.640918	0.642088	1.08608	Higher meth.	4323
PAAD	MMP14	cg18207699	DSS	0.363498	0.365051	0.812151	Lower meth.	4323
PAAD	MMP14	cg18207699	DFI	0.914149	0.914156	1.04624	Higher meth.	4323
PAAD	MMP2	cg10079740	OS	0.3004	0.301523	1.23291	Higher meth.	4313
PAAD	MMP2	cg10079740	PFS	0.0476612	0.0486544	1.42301	Higher meth.	4313
PAAD	MMP2	cg10079740	DSS	0.565024	0.566124	1.13947	Higher meth.	4313
PAAD	MMP2	cg10079740	DFI	0.203257	0.208332	1.69681	Higher meth.	4313
PAAD	MMP3	cg16466334	OS	0.101686	0.103434	0.718426	Lower meth.	4314
PAAD	MMP3	cg16466334	PFS	0.543215	0.540306	0.896466	Lower meth.	4314
PAAD	MMP3	cg16466334	DSS	0.117421	0.119615	0.701399	Lower meth.	4314
PAAD	MMP3	cg16466334	DFI	0.367567	0.370289	0.686347	Lower meth.	4314
PAAD	MMP9	cg02310296	OS	0.858357	0.85786	0.96452	Lower meth.	4318
PAAD	MMP9	cg02310296	PFS	0.557441	0.559064	1.10934	Higher meth.	4318
PAAD	MMP9	cg02310296	DSS	0.724921	0.724403	0.922908	Lower meth.	4318
PAAD	MMP9	cg02310296	DFI	0.965716	0.965717	1.01832	Higher meth.	4318
PAAD	PECAM1	cg02459519	OS	0.509231	0.509597	1.14205	Higher meth.	5175
PAAD	PECAM1	cg02459519	PFS	0.225706	0.226488	1.2408	Higher meth.	5175
PAAD	PECAM1	cg02459519	DSS	0.581688	0.581882	1.13315	Higher meth.	5175
PAAD	PECAM1	cg02459519	DFI	0.167989	0.173911	1.791	Higher meth.	5175
PAAD	SERPINE1	cg01975495	OS	0.558711	0.559045	0.888301	Lower meth.	5054
PAAD	SERPINE1	cg01975495	PFS	0.339528	0.340364	0.841698	Lower meth.	5054
PAAD	SERPINE1	cg01975495	DSS	0.123916	0.125779	0.702674	Lower meth.	5054
PAAD	SERPINE1	cg01975495	DFI	0.680582	0.680929	0.838295	Lower meth.	5054
PAAD	SPP1	cg15460348	OS	0.398182	0.397466	0.842841	Lower meth.	6696
PAAD	SPP1	cg15460348	PFS	0.253072	0.254404	0.815479	Lower meth.	6696
PAAD	SPP1	cg15460348	DSS	0.182994	0.184018	0.738825	Lower meth.	6696
PAAD	SPP1	cg15460348	DFI	0.367561	0.370234	0.683944	Lower meth.	6696
PAAD	TIMP2	cg26927190	OS	0.129293	0.131279	0.735544	Lower meth.	7077
PAAD	TIMP2	cg26927190	PFS	0.165612	0.16745	0.781123	Lower meth.	7077
PAAD	TIMP2	cg26927190	DSS	0.109649	0.112118	0.695261	Lower meth.	7077
PAAD	TIMP2	cg26927190	DFI	0.666792	0.6672	0.834471	Lower meth.	7077
PAAD	TNF	cg01360627	OS	0.329378	0.329544	1.21904	Higher meth.	7124
PAAD	TNF	cg01360627	PFS	0.795063	0.794088	1.04789	Higher meth.	7124
PAAD	TNF	cg01360627	DSS	0.532302	0.532036	1.15324	Higher meth.	7124
PAAD	TNF	cg01360627	DFI	0.718236	0.718494	1.17504	Higher meth.	7124
PAAD	TNFRSF11B	cg17171407	OS	0.0191224	0.0202319	1.60559	Higher meth.	4982
PAAD	TNFRSF11B	cg17171407	PFS	0.0344738	0.0353748	1.4585	Higher meth.	4982
PAAD	TNFRSF11B	cg17171407	DSS	0.0959145	0.0976885	1.45778	Higher meth.	4982
PAAD	TNFRSF11B	cg17171407	DFI	0.0915702	0.0981561	2.04212	Higher meth.	4982
PCPG	FGF2	cg03737475	OS	0.980037	0.980037	0.979688	Lower meth.	2247
PCPG	FGF2	cg03737475	PFS	0.840262	0.84031	1.08986	Higher meth.	2247
PCPG	FGF2	cg03737475	DSS	0.957515	0.95752	0.947831	Lower meth.	2247
PCPG	FGF2	cg03737475	DFI	0.455361	0.468321	0.432512	Lower meth.	2247
PCPG	ICAM1	cg13720472	OS	0.489896	0.495787	1.82783	Higher meth.	3383
PCPG	ICAM1	cg13720472	PFS	0.275092	0.279416	1.60144	Higher meth.	3383
PCPG	ICAM1	cg13720472	DSS	0.424271	0.438443	2.50062	Higher meth.	3383
PCPG	ICAM1	cg13720472	DFI	0.427154	0.442071	0.41126	Lower meth.	3383
PCPG	ICAM3	cg14145194	OS	0.826358	0.826569	1.20248	Higher meth.	3385
PCPG	ICAM3	cg14145194	PFS	0.764996	0.765148	0.879268	Lower meth.	3385
PCPG	ICAM3	cg14145194	DSS	0.177769	0.209267	4.55179	Higher meth.	3385
PCPG	ICAM3	cg14145194	DFI	0.949031	0.94904	1.06628	Higher meth.	3385
PCPG	ITGA2	cg05928650	OS	0.913498	0.913526	1.09299	Higher meth.	3673
PCPG	ITGA2	cg05928650	PFS	0.543755	0.544861	1.29774	Higher meth.	3673
PCPG	ITGA2	cg05928650	DSS	0.883289	0.883392	1.15848	Higher meth.	3673
PCPG	ITGA2	cg05928650	DFI	0.341377	0.363256	0.349886	Lower meth.	3673
PCPG	LCP1	cg06477663	OS	0.280912	0.295579	0.391074	Lower meth.	3936
PCPG	LCP1	cg06477663	PFS	0.0760705	0.0838418	0.452631	Lower meth.	3936
PCPG	LCP1	cg06477663	DSS	0.748321	0.749239	0.716854	Lower meth.	3936
PCPG	LCP1	cg06477663	DFI	0.313884	0.338225	0.330752	Lower meth.	3936
PCPG	MMP1	cg13759446	OS	0.144766	0.180599	0.22748	Lower meth.	4312
PCPG	MMP1	cg13759446	PFS	0.441189	0.443276	0.716813	Lower meth.	4312
PCPG	MMP1	cg13759446	DSS	0.440771	0.453922	0.412891	Lower meth.	4312
PCPG	MMP1	cg13759446	DFI	0.895398	0.895473	0.876866	Lower meth.	4312
PCPG	MMP10	cg00347729	OS	0.443179	0.45112	0.51974	Lower meth.	4319
PCPG	MMP10	cg00347729	PFS	0.162646	0.169145	0.54331	Lower meth.	4319
PCPG	MMP10	cg00347729	DSS	0.944114	0.944125	1.07296	Higher meth.	4319
PCPG	MMP10	cg00347729	DFI	0.179406	0.21632	0.238933	Lower meth.	4319
PCPG	MMP12	cg14948108	OS	0.986056	0.986057	1.01443	Higher meth.	4321
PCPG	MMP12	cg14948108	PFS	0.838453	0.838501	1.0918	Higher meth.	4321
PCPG	MMP12	cg14948108	DSS	0.963336	0.963339	1.04729	Higher meth.	4321
PCPG	MMP12	cg14948108	DFI	0.315739	0.339058	0.328214	Lower meth.	4321
PCPG	MMP13	cg03067994	OS	0.108443	0.147189	0.203824	Lower meth.	4322
PCPG	MMP13	cg03067994	PFS	0.678741	0.679134	0.83743	Lower meth.	4322
PCPG	MMP13	cg03067994	DSS	0.337784	0.359687	0.34598	Lower meth.	4322
PCPG	MMP13	cg03067994	DFI	0.851984	0.852189	0.828833	Lower meth.	4322
PCPG	MMP14	cg27020028	OS	0.875435	0.875512	1.14121	Higher meth.	4323
PCPG	MMP14	cg27020028	PFS	0.0733585	0.081113	2.22528	Higher meth.	4323
PCPG	MMP14	cg27020028	DSS	0.197114	0.226424	4.33773	Higher meth.	4323
PCPG	MMP14	cg27020028	DFI	0.38152	0.399585	2.66038	Higher meth.	4323
PCPG	MMP2	cg05782444	OS	0.49591	0.501896	0.558426	Lower meth.	4313
PCPG	MMP2	cg05782444	PFS	0.765618	0.765769	1.13593	Higher meth.	4313
PCPG	MMP2	cg05782444	DSS	0.900441	0.900504	1.13367	Higher meth.	4313
PCPG	MMP2	cg05782444	DFI	0.9636	0.963603	0.954761	Lower meth.	4313
PCPG	MMP3	cg18113270	OS	0.961634	0.961636	1.04019	Higher meth.	4314
PCPG	MMP3	cg18113270	PFS	0.969938	0.969938	0.984041	Lower meth.	4314
PCPG	MMP3	cg18113270	DSS	0.948473	0.948482	1.06708	Higher meth.	4314
PCPG	MMP3	cg18113270	DFI	0.886197	0.886293	0.866746	Lower meth.	4314
PCPG	MMP9	cg00732815	OS	0.912778	0.912807	1.09377	Higher meth.	4318
PCPG	MMP9	cg00732815	PFS	0.595681	0.596463	1.25495	Higher meth.	4318
PCPG	MMP9	cg00732815	DSS	0.91365	0.913691	1.11492	Higher meth.	4318
PCPG	MMP9	cg00732815	DFI	0.956383	0.956389	0.946582	Lower meth.	4318
PCPG	PECAM1	cg02459519	OS	0.798933	0.799261	1.23825	Higher meth.	5175
PCPG	PECAM1	cg02459519	PFS	0.445834	0.447795	1.38633	Higher meth.	5175
PCPG	PECAM1	cg02459519	DSS	0.178653	0.210111	4.53914	Higher meth.	5175
PCPG	PECAM1	cg02459519	DFI	0.241565	0.272591	3.56006	Higher meth.	5175
PCPG	SERPINE1	cg01975495	OS	0.875267	0.875351	0.879567	Lower meth.	5054
PCPG	SERPINE1	cg01975495	PFS	0.748981	0.749169	1.14687	Higher meth.	5054
PCPG	SERPINE1	cg01975495	DSS	0.402232	0.418974	2.54654	Higher meth.	5054
PCPG	SERPINE1	cg01975495	DFI	0.865214	0.865369	0.842911	Lower meth.	5054
PCPG	SPP1	cg15460348	OS	0.17497	0.210643	0.246653	Lower meth.	6696
PCPG	SPP1	cg15460348	PFS	0.471219	0.472967	1.3687	Higher meth.	6696
PCPG	SPP1	cg15460348	DSS	0.536067	0.545281	0.476738	Lower meth.	6696
PCPG	SPP1	cg15460348	DFI	0.985626	0.985627	0.982137	Lower meth.	6696
PCPG	TIMP2	cg01698392	OS	0.104141	0.142062	5.08254	Higher meth.	7077
PCPG	TIMP2	cg01698392	PFS	0.040609	0.0477357	2.4797	Higher meth.	7077
PCPG	TIMP2	cg01698392	DSS	0.374152	0.391889	2.75759	Higher meth.	7077
PCPG	TIMP2	cg01698392	DFI	0.761277	0.762158	1.35349	Higher meth.	7077
PCPG	TNF	cg21370522	OS	0.566044	0.569764	1.65154	Higher meth.	7124
PCPG	TNF	cg21370522	PFS	0.736727	0.736937	0.865068	Lower meth.	7124
PCPG	TNF	cg21370522	DSS	0.771334	0.772019	0.739083	Lower meth.	7124
PCPG	TNF	cg21370522	DFI	0.231238	0.262713	0.27207	Lower meth.	7124
PCPG	TNFRSF11B	cg13268132	OS	0.941127	0.941136	1.06255	Higher meth.	4982
PCPG	TNFRSF11B	cg13268132	PFS	0.925928	0.925932	1.04129	Higher meth.	4982
PCPG	TNFRSF11B	cg13268132	DSS	0.99605	0.99605	0.995026	Lower meth.	4982
PCPG	TNFRSF11B	cg13268132	DFI	0.99999	0.99999	0.999988	Lower meth.	4982
PRAD	FGF2	cg03941587	OS	0.442951	0.4479	1.70484	Higher meth.	2247
PRAD	FGF2	cg03941587	PFS	0.0511644	0.0527827	1.49757	Higher meth.	2247
PRAD	FGF2	cg03941587	DSS	0.863484	0.863616	1.17207	Higher meth.	2247
PRAD	FGF2	cg03941587	DFI	0.104365	0.109707	1.83363	Higher meth.	2247
PRAD	ICAM1	cg00500176	OS	0.874823	0.874875	0.901825	Lower meth.	3383
PRAD	ICAM1	cg00500176	PFS	0.566866	0.567095	0.889278	Lower meth.	3383
PRAD	ICAM1	cg00500176	DSS	0.794686	0.795152	0.788735	Lower meth.	3383
PRAD	ICAM1	cg00500176	DFI	0.401835	0.40368	1.36075	Higher meth.	3383
PRAD	ICAM3	cg14145194	OS	0.49642	0.499775	0.646078	Lower meth.	3385
PRAD	ICAM3	cg14145194	PFS	0.152179	0.153564	0.746455	Lower meth.	3385
PRAD	ICAM3	cg14145194	DSS	0.611326	0.614425	0.630776	Lower meth.	3385
PRAD	ICAM3	cg14145194	DFI	0.794616	0.794692	0.909106	Lower meth.	3385
PRAD	ITGA2	cg15676241	OS	0.430266	0.435455	0.57392	Lower meth.	3673
PRAD	ITGA2	cg15676241	PFS	2.0047e-05	3.781e-05	0.4	Lower meth.	3673
PRAD	ITGA2	cg15676241	DSS	0.949731	0.949737	0.94185	Lower meth.	3673
PRAD	ITGA2	cg15676241	DFI	0.000411284	0.00112018	0.244733	Lower meth.	3673
PRAD	LCP1	cg10983853	OS	0.653495	0.654579	1.33841	Higher meth.	3936
PRAD	LCP1	cg10983853	PFS	0.298792	0.299691	1.23559	Higher meth.	3936
PRAD	LCP1	cg10983853	DSS	0.647748	0.650059	1.51482	Higher meth.	3936
PRAD	LCP1	cg10983853	DFI	0.726399	0.72658	0.879004	Lower meth.	3936
PRAD	MMP1	cg16575408	OS	0.378874	0.385623	0.543151	Lower meth.	4312
PRAD	MMP1	cg16575408	PFS	0.0438037	0.045291	0.658739	Lower meth.	4312
PRAD	MMP1	cg16575408	DSS	0.265778	0.292427	0.305598	Lower meth.	4312
PRAD	MMP1	cg16575408	DFI	0.73734	0.737498	0.884774	Lower meth.	4312
PRAD	MMP10	cg02061229	OS	0.901898	0.901922	1.08176	Higher meth.	4319
PRAD	MMP10	cg02061229	PFS	0.510367	0.510701	1.14344	Higher meth.	4319
PRAD	MMP10	cg02061229	DSS	0.652825	0.65504	1.50521	Higher meth.	4319
PRAD	MMP10	cg02061229	DFI	0.486967	0.488127	1.28931	Higher meth.	4319
PRAD	MMP12	cg09002726	OS	0.173604	0.188401	2.48104	Higher meth.	4321
PRAD	MMP12	cg09002726	PFS	0.15629	0.157733	1.33459	Higher meth.	4321
PRAD	MMP12	cg09002726	DSS	0.549758	0.554547	1.71601	Higher meth.	4321
PRAD	MMP12	cg09002726	DFI	0.22539	0.229141	1.5595	Higher meth.	4321
PRAD	MMP13	cg22658979	OS	0.275286	0.285841	2.09818	Higher meth.	4322
PRAD	MMP13	cg22658979	PFS	0.411661	0.412066	1.18195	Higher meth.	4322
PRAD	MMP13	cg22658979	DSS	0.635861	0.638405	1.53788	Higher meth.	4322
PRAD	MMP13	cg22658979	DFI	0.814652	0.814708	0.917034	Lower meth.	4322
PRAD	MMP14	cg10418289	OS	0.291844	0.301767	2.04838	Higher meth.	4323
PRAD	MMP14	cg10418289	PFS	0.0710863	0.0727441	1.44947	Higher meth.	4323
PRAD	MMP14	cg10418289	DSS	0.692163	0.693715	1.4339	Higher meth.	4323
PRAD	MMP14	cg10418289	DFI	0.0335874	0.0385182	2.22971	Higher meth.	4323
PRAD	MMP2	cg08133699	OS	0.949905	0.949908	0.960538	Lower meth.	4313
PRAD	MMP2	cg08133699	PFS	0.00496037	0.00560963	0.556074	Lower meth.	4313
PRAD	MMP2	cg08133699	DSS	0.637622	0.640137	0.65191	Lower meth.	4313
PRAD	MMP2	cg08133699	DFI	0.00148583	0.00282965	0.291185	Lower meth.	4313
PRAD	MMP3	cg17145397	OS	0.314229	0.323653	2.02599	Higher meth.	4314
PRAD	MMP3	cg17145397	PFS	0.257179	0.258183	0.791717	Lower meth.	4314
PRAD	MMP3	cg17145397	DSS	0.638714	0.641002	0.646014	Lower meth.	4314
PRAD	MMP3	cg17145397	DFI	0.695835	0.69608	1.15392	Higher meth.	4314
PRAD	MMP9	cg00732815	OS	0.689203	0.689991	0.771394	Lower meth.	4318
PRAD	MMP9	cg00732815	PFS	0.123101	0.124725	1.37027	Higher meth.	4318
PRAD	MMP9	cg00732815	DSS	0.685366	0.687026	0.691801	Lower meth.	4318
PRAD	MMP9	cg00732815	DFI	0.407378	0.409153	1.35298	Higher meth.	4318
PRAD	PECAM1	cg20830994	OS	0.385689	0.391545	0.572786	Lower meth.	5175
PRAD	PECAM1	cg20830994	PFS	0.142612	0.144111	0.74171	Lower meth.	5175
PRAD	PECAM1	cg20830994	DSS	0.58419	0.587979	0.609427	Lower meth.	5175
PRAD	PECAM1	cg20830994	DFI	0.126698	0.131704	0.569948	Lower meth.	5175
PRAD	SERPINE1	cg01975495	OS	0.188819	0.202848	2.41714	Higher meth.	5054
PRAD	SERPINE1	cg01975495	PFS	0.932941	0.932938	0.98302	Lower meth.	5054
PRAD	SERPINE1	cg01975495	DSS	0.58746	0.591102	1.63733	Higher meth.	5054
PRAD	SERPINE1	cg01975495	DFI	0.885743	0.885756	0.948235	Lower meth.	5054
PRAD	SPP1	cg00088885	OS	0.495263	0.498665	1.54826	Higher meth.	6696
PRAD	SPP1	cg00088885	PFS	0.679709	0.679802	1.08768	Higher meth.	6696
PRAD	SPP1	cg00088885	DSS	0.674805	0.676624	1.46529	Higher meth.	6696
PRAD	SPP1	cg00088885	DFI	0.237262	0.240968	1.54916	Higher meth.	6696
PRAD	TIMP2	cg00863893	OS	0.414072	0.419673	1.77756	Higher meth.	7077
PRAD	TIMP2	cg00863893	PFS	0.588233	0.588413	0.895197	Lower meth.	7077
PRAD	TIMP2	cg00863893	DSS	0.269433	0.295431	3.29638	Higher meth.	7077
PRAD	TIMP2	cg00863893	DFI	0.341839	0.344257	1.41796	Higher meth.	7077
PRAD	TNF	cg21467614	OS	0.688883	0.689626	0.773761	Lower meth.	7124
PRAD	TNF	cg21467614	PFS	0.0199599	0.0211554	1.61618	Higher meth.	7124
PRAD	TNF	cg21467614	DSS	0.375408	0.38621	0.432327	Lower meth.	7124
PRAD	TNF	cg21467614	DFI	0.0434447	0.0484592	2.11351	Higher meth.	7124
PRAD	TNFRSF11B	cg19620294	OS	0.681431	0.682294	1.30359	Higher meth.	4982
PRAD	TNFRSF11B	cg19620294	PFS	0.174649	0.176131	1.3209	Higher meth.	4982
PRAD	TNFRSF11B	cg19620294	DSS	0.245597	0.274685	3.39613	Higher meth.	4982
PRAD	TNFRSF11B	cg19620294	DFI	0.109578	0.114878	1.81828	Higher meth.	4982
READ	FGF2	cg09108314	OS	0.723321	0.72364	1.18867	Higher meth.	2247
READ	FGF2	cg09108314	PFS	0.612177	0.614385	1.2121	Higher meth.	2247
READ	FGF2	cg09108314	DSS	0.119482	0.157826	4.70392	Higher meth.	2247
READ	FGF2	cg09108314	DFI	0.130642	0.168145	4.73642	Higher meth.	2247
READ	ICAM1	cg00500176	OS	0.337533	0.341855	1.60122	Higher meth.	3383
READ	ICAM1	cg00500176	PFS	0.968332	0.968345	1.01498	Higher meth.	3383
READ	ICAM1	cg00500176	DSS	0.651346	0.653138	1.44537	Higher meth.	3383
READ	ICAM1	cg00500176	DFI	0.52169	0.52971	0.489091	Lower meth.	3383
READ	ICAM3	cg14145194	OS	0.0162637	0.0233	3.38532	Higher meth.	3385
READ	ICAM3	cg14145194	PFS	0.019287	0.0234402	2.46907	Higher meth.	3385
READ	ICAM3	cg14145194	DSS	0.0273599	0.0600663	8.04424	Higher meth.	3385
READ	ICAM3	cg14145194	DFI	0.140863	0.162584	3.85347	Higher meth.	3385
READ	ITGA2	cg08874888	OS	0.00162199	0.00743413	0.133229	Lower meth.	3673
READ	ITGA2	cg08874888	PFS	0.0784415	0.0841907	0.507875	Lower meth.	3673
READ	ITGA2	cg08874888	DSS	0.048315	0.0868043	0.153158	Lower meth.	3673
READ	ITGA2	cg08874888	DFI	0.083455	0.122939	5.69284	Higher meth.	3673
READ	LCP1	cg06477663	OS	0.241146	0.247265	0.561906	Lower meth.	3936
READ	LCP1	cg06477663	PFS	0.835174	0.835437	1.08205	Higher meth.	3936
READ	LCP1	cg06477663	DSS	0.485628	0.491958	0.550691	Lower meth.	3936
READ	LCP1	cg06477663	DFI	0.415638	0.425624	2.07733	Higher meth.	3936
READ	MMP1	cg14543953	OS	0.565842	0.567114	1.34261	Higher meth.	4312
READ	MMP1	cg14543953	PFS	0.560973	0.560411	0.7967	Lower meth.	4312
READ	MMP1	cg14543953	DSS	0.994934	0.994934	1.00522	Higher meth.	4312
READ	MMP1	cg14543953	DFI	0.634333	0.636894	0.648593	Lower meth.	4312
READ	MMP10	cg00347729	OS	0.872762	0.872792	0.924512	Lower meth.	4319
READ	MMP10	cg00347729	PFS	0.56795	0.568815	0.804842	Lower meth.	4319
READ	MMP10	cg00347729	DSS	0.353236	0.365454	0.456558	Lower meth.	4319
READ	MMP10	cg00347729	DFI	0.55298	0.559818	1.92578	Higher meth.	4319
READ	MMP12	cg14948108	OS	0.768252	0.76844	0.86312	Lower meth.	4321
READ	MMP12	cg14948108	PFS	0.327422	0.329339	0.68718	Lower meth.	4321
READ	MMP12	cg14948108	DSS	0.92541	0.925427	1.07999	Higher meth.	4321
READ	MMP12	cg14948108	DFI	0.853386	0.853536	0.84033	Lower meth.	4321
READ	MMP13	cg03067994	OS	0.0559627	0.0673406	0.348814	Lower meth.	4322
READ	MMP13	cg03067994	PFS	0.0480121	0.0537579	0.459626	Lower meth.	4322
READ	MMP13	cg03067994	DSS	0.396625	0.406258	0.482582	Lower meth.	4322
READ	MMP13	cg03067994	DFI	0.65587	0.658784	0.599993	Lower meth.	4322
READ	MMP14	cg10418289	OS	0.375932	0.379412	1.54016	Higher meth.	4323
READ	MMP14	cg10418289	PFS	0.659104	0.658098	0.844735	Lower meth.	4323
READ	MMP14	cg10418289	DSS	0.715004	0.716093	0.727314	Lower meth.	4323
READ	MMP14	cg10418289	DFI	0.293886	0.999066	3.22826e-09	Lower meth.	4323
READ	MMP2	cg04049508	OS	0.176208	0.183427	1.99415	Higher meth.	4313
READ	MMP2	cg04049508	PFS	0.199286	0.204047	1.64712	Higher meth.	4313
READ	MMP2	cg04049508	DSS	0.910214	0.910244	1.09706	Higher meth.	4313
READ	MMP2	cg04049508	DFI	0.513446	0.519245	1.81165	Higher meth.	4313
READ	MMP3	cg09615874	OS	0.361788	0.365629	1.56894	Higher meth.	4314
READ	MMP3	cg09615874	PFS	0.90445	0.904537	1.04669	Higher meth.	4314
READ	MMP3	cg09615874	DSS	0.974545	0.974545	1.0264	Higher meth.	4314
READ	MMP3	cg09615874	DFI	0.786814	0.787331	0.780984	Lower meth.	4314
READ	MMP9	cg08176368	OS	0.176872	0.184932	0.508904	Lower meth.	4318
READ	MMP9	cg08176368	PFS	0.125814	0.131096	0.558892	Lower meth.	4318
READ	MMP9	cg08176368	DSS	0.777106	0.777583	0.793659	Lower meth.	4318
READ	MMP9	cg08176368	DFI	0.903211	0.903257	1.11985	Higher meth.	4318
READ	PECAM1	cg00427260	OS	0.498407	0.500414	1.41308	Higher meth.	5175
READ	PECAM1	cg00427260	PFS	0.389667	0.390561	0.725136	Lower meth.	5175
READ	PECAM1	cg00427260	DSS	0.475391	0.482029	1.84409	Higher meth.	5175
READ	PECAM1	cg00427260	DFI	0.333304	0.354274	0.353416	Lower meth.	5175
READ	SERPINE1	cg12584355	OS	0.661964	0.662563	0.805698	Lower meth.	5054
READ	SERPINE1	cg12584355	PFS	0.23477	0.237896	0.633899	Lower meth.	5054
READ	SERPINE1	cg12584355	DSS	0.953118	0.953122	1.04941	Higher meth.	5054
READ	SERPINE1	cg12584355	DFI	0.608273	0.61138	1.59536	Higher meth.	5054
READ	SPP1	cg20261167	OS	0.412464	0.41537	1.49987	Higher meth.	6696
READ	SPP1	cg20261167	PFS	0.235357	0.238341	1.56334	Higher meth.	6696
READ	SPP1	cg20261167	DSS	0.54717	0.551498	0.595509	Lower meth.	6696
READ	SPP1	cg20261167	DFI	0.880194	0.880286	1.1483	Higher meth.	6696
READ	TIMP2	cg13694343	OS	0.46524	0.467529	0.696259	Lower meth.	7077
READ	TIMP2	cg13694343	PFS	0.635429	0.635959	0.836849	Lower meth.	7077
READ	TIMP2	cg13694343	DSS	0.828477	0.828694	1.19378	Higher meth.	7077
READ	TIMP2	cg13694343	DFI	0.664736	0.667704	0.617548	Lower meth.	7077
READ	TNF	cg17741993	OS	0.357987	0.361894	1.57453	Higher meth.	7124
READ	TNF	cg17741993	PFS	0.984092	0.984059	0.992563	Lower meth.	7124
READ	TNF	cg17741993	DSS	0.0124308	0.998378	6.21424e+08	Higher meth.	7124
READ	TNF	cg17741993	DFI	0.512595	0.518603	1.80474	Higher meth.	7124
READ	TNFRSF11B	cg17171407	OS	0.217088	0.224276	1.85704	Higher meth.	4982
READ	TNFRSF11B	cg17171407	PFS	0.23507	0.239041	1.56167	Higher meth.	4982
READ	TNFRSF11B	cg17171407	DSS	0.294985	0.310309	2.41168	Higher meth.	4982
READ	TNFRSF11B	cg17171407	DFI	0.969649	0.969651	1.03738	Higher meth.	4982
SARC	FGF2	cg17547898	OS	0.713566	0.713132	0.928677	Lower meth.	2247
SARC	FGF2	cg17547898	PFS	0.279993	0.280841	0.840722	Lower meth.	2247
SARC	FGF2	cg17547898	DSS	0.824213	0.823632	0.951605	Lower meth.	2247
SARC	FGF2	cg17547898	DFI	0.777126	0.777761	0.932693	Lower meth.	2247
SARC	ICAM1	cg26549174	OS	0.693464	0.694222	0.92372	Lower meth.	3383
SARC	ICAM1	cg26549174	PFS	0.197188	0.198448	0.812369	Lower meth.	3383
SARC	ICAM1	cg26549174	DSS	0.856205	0.856986	0.960653	Lower meth.	3383
SARC	ICAM1	cg26549174	DFI	0.23572	0.237663	0.74717	Lower meth.	3383
SARC	ICAM3	cg05323251	OS	0.207217	0.20809	1.29201	Higher meth.	3385
SARC	ICAM3	cg05323251	PFS	0.612544	0.612764	0.921842	Lower meth.	3385
SARC	ICAM3	cg05323251	DSS	0.467097	0.466737	1.17655	Higher meth.	3385
SARC	ICAM3	cg05323251	DFI	0.393675	0.396065	0.812392	Lower meth.	3385
SARC	ITGA2	cg08874888	OS	0.574903	0.576348	0.89343	Lower meth.	3673
SARC	ITGA2	cg08874888	PFS	0.738679	0.739574	0.947947	Lower meth.	3673
SARC	ITGA2	cg08874888	DSS	0.86407	0.865627	0.963016	Lower meth.	3673
SARC	ITGA2	cg08874888	DFI	0.719665	0.718707	1.09294	Higher meth.	3673
SARC	LCP1	cg17771150	OS	0.777469	0.778518	0.944911	Lower meth.	3936
SARC	LCP1	cg17771150	PFS	0.290513	0.290978	0.843705	Lower meth.	3936
SARC	LCP1	cg17771150	DSS	0.82451	0.825745	0.95209	Lower meth.	3936
SARC	LCP1	cg17771150	DFI	0.520786	0.521755	0.854876	Lower meth.	3936
SARC	MMP1	cg16575408	OS	0.920521	0.920236	0.979888	Lower meth.	4312
SARC	MMP1	cg16575408	PFS	0.623356	0.622807	1.08258	Higher meth.	4312
SARC	MMP1	cg16575408	DSS	0.773073	0.773492	1.06705	Higher meth.	4312
SARC	MMP1	cg16575408	DFI	0.975244	0.975595	0.9925	Lower meth.	4312
SARC	MMP10	cg00347729	OS	0.145636	0.14732	0.745154	Lower meth.	4319
SARC	MMP10	cg00347729	PFS	0.98809	0.987377	1.00255	Higher meth.	4319
SARC	MMP10	cg00347729	DSS	0.314959	0.316402	0.799429	Lower meth.	4319
SARC	MMP10	cg00347729	DFI	0.952903	0.955453	0.986419	Lower meth.	4319
SARC	MMP12	cg20487452	OS	0.18388	0.185446	0.765202	Lower meth.	4321
SARC	MMP12	cg20487452	PFS	0.453584	0.455081	0.886701	Lower meth.	4321
SARC	MMP12	cg20487452	DSS	0.719932	0.720438	0.923386	Lower meth.	4321
SARC	MMP12	cg20487452	DFI	0.556607	0.559047	0.866789	Lower meth.	4321
SARC	MMP13	cg22658979	OS	0.00934285	0.0101389	0.591362	Lower meth.	4322
SARC	MMP13	cg22658979	PFS	0.010625	0.0111006	0.662601	Lower meth.	4322
SARC	MMP13	cg22658979	DSS	0.0196929	0.0210279	0.594366	Lower meth.	4322
SARC	MMP13	cg22658979	DFI	0.20275	0.20431	0.729387	Lower meth.	4322
SARC	MMP14	cg04219048	OS	0.103937	0.105664	0.720226	Lower meth.	4323
SARC	MMP14	cg04219048	PFS	0.713	0.715199	0.942969	Lower meth.	4323
SARC	MMP14	cg04219048	DSS	0.409319	0.410418	0.832373	Lower meth.	4323
SARC	MMP14	cg04219048	DFI	0.273376	0.274103	1.31361	Higher meth.	4323
SARC	MMP2	cg14400118	OS	0.0370451	0.0384966	0.654365	Lower meth.	4313
SARC	MMP2	cg14400118	PFS	0.061492	0.0622027	0.739676	Lower meth.	4313
SARC	MMP2	cg14400118	DSS	0.0708265	0.0728095	0.666347	Lower meth.	4313
SARC	MMP2	cg14400118	DFI	0.803846	0.80289	0.940339	Lower meth.	4313
SARC	MMP3	cg16466334	OS	0.0867637	0.0886586	0.707651	Lower meth.	4314
SARC	MMP3	cg16466334	PFS	0.145682	0.146704	0.791129	Lower meth.	4314
SARC	MMP3	cg16466334	DSS	0.166974	0.169267	0.735037	Lower meth.	4314
SARC	MMP3	cg16466334	DFI	0.705178	0.705186	0.911549	Lower meth.	4314
SARC	MMP9	cg02310296	OS	0.260897	0.262274	0.797033	Lower meth.	4318
SARC	MMP9	cg02310296	PFS	0.100724	0.101977	0.767891	Lower meth.	4318
SARC	MMP9	cg02310296	DSS	0.463079	0.464083	0.849507	Lower meth.	4318
SARC	MMP9	cg02310296	DFI	0.19356	0.195251	0.727722	Lower meth.	4318
SARC	PECAM1	cg00427260	OS	0.798343	0.798789	0.94997	Lower meth.	5175
SARC	PECAM1	cg00427260	PFS	0.669279	0.668746	0.933445	Lower meth.	5175
SARC	PECAM1	cg00427260	DSS	0.976783	0.97632	1.00664	Higher meth.	5175
SARC	PECAM1	cg00427260	DFI	0.0747999	0.0772116	0.644855	Lower meth.	5175
SARC	SERPINE1	cg01975495	OS	0.043685	0.0450766	1.50778	Higher meth.	5054
SARC	SERPINE1	cg01975495	PFS	0.348609	0.349393	1.16259	Higher meth.	5054
SARC	SERPINE1	cg01975495	DSS	0.0515649	0.0533299	1.552	Higher meth.	5054
SARC	SERPINE1	cg01975495	DFI	0.574887	0.576033	1.14683	Higher meth.	5054
SARC	SPP1	cg00088885	OS	0.0696276	0.0714125	0.694356	Lower meth.	6696
SARC	SPP1	cg00088885	PFS	0.147398	0.148437	0.792076	Lower meth.	6696
SARC	SPP1	cg00088885	DSS	0.32073	0.322498	0.802189	Lower meth.	6696
SARC	SPP1	cg00088885	DFI	0.513404	0.515216	0.852545	Lower meth.	6696
SARC	TIMP2	cg13694343	OS	0.153538	0.154993	0.749361	Lower meth.	7077
SARC	TIMP2	cg13694343	PFS	0.168373	0.169282	0.800975	Lower meth.	7077
SARC	TIMP2	cg13694343	DSS	0.198512	0.200071	0.750722	Lower meth.	7077
SARC	TIMP2	cg13694343	DFI	0.352831	0.353356	0.796774	Lower meth.	7077
SARC	TNF	cg23384708	OS	0.362543	0.363963	0.832832	Lower meth.	7124
SARC	TNF	cg23384708	PFS	0.0264797	0.0273542	0.700479	Lower meth.	7124
SARC	TNF	cg23384708	DSS	0.445291	0.44685	0.844021	Lower meth.	7124
SARC	TNF	cg23384708	DFI	0.429239	0.429953	0.824372	Lower meth.	7124
SARC	TNFRSF11B	cg17293641	OS	0.271918	0.27306	1.24735	Higher meth.	4982
SARC	TNFRSF11B	cg17293641	PFS	0.635832	0.635629	1.07931	Higher meth.	4982
SARC	TNFRSF11B	cg17293641	DSS	0.187715	0.189467	1.34028	Higher meth.	4982
SARC	TNFRSF11B	cg17293641	DFI	0.424439	0.424726	1.21558	Higher meth.	4982
SKCM	FGF2	cg24683623	OS	0.0798693	0.0806187	1.26747	Higher meth.	2247
SKCM	FGF2	cg24683623	PFS	0.220734	0.22142	1.14701	Higher meth.	2247
SKCM	FGF2	cg24683623	DSS	0.0396038	0.0403825	1.35326	Higher meth.	2247
SKCM	ICAM1	cg10651168	OS	0.191349	0.191782	1.19395	Higher meth.	3383
SKCM	ICAM1	cg10651168	PFS	0.190746	0.191129	1.15753	Higher meth.	3383
SKCM	ICAM1	cg10651168	DSS	0.065197	0.0659162	1.31226	Higher meth.	3383
SKCM	ICAM3	cg14145194	OS	0.00108578	0.0011947	1.56307	Higher meth.	3385
SKCM	ICAM3	cg14145194	PFS	0.0929455	0.093629	1.20693	Higher meth.	3385
SKCM	ICAM3	cg14145194	DSS	0.000210234	0.000253084	1.741	Higher meth.	3385
SKCM	ITGA2	cg08446038	OS	0.41902	0.419152	1.11546	Higher meth.	3673
SKCM	ITGA2	cg08446038	PFS	0.270269	0.270507	1.13161	Higher meth.	3673
SKCM	ITGA2	cg08446038	DSS	0.571892	0.572014	1.08648	Higher meth.	3673
SKCM	LCP1	cg17771150	OS	0.000933686	0.00103101	1.56971	Higher meth.	3936
SKCM	LCP1	cg17771150	PFS	0.187031	0.18762	1.15916	Higher meth.	3936
SKCM	LCP1	cg17771150	DSS	0.00027474	0.000325387	1.7168	Higher meth.	3936
SKCM	MMP1	cg13759446	OS	0.0863367	0.0870462	1.26072	Higher meth.	4312
SKCM	MMP1	cg13759446	PFS	0.514185	0.513261	1.07585	Higher meth.	4312
SKCM	MMP1	cg13759446	DSS	0.0518312	0.0526551	1.33016	Higher meth.	4312
SKCM	MMP10	cg02061229	OS	7.1062e-05	8.6017e-05	1.7052	Higher meth.	4319
SKCM	MMP10	cg02061229	PFS	0.0133736	0.0135923	1.31996	Higher meth.	4319
SKCM	MMP10	cg02061229	DSS	0.000269785	0.000316642	1.70061	Higher meth.	4319
SKCM	MMP12	cg09002726	OS	0.492358	0.492166	1.09776	Higher meth.	4321
SKCM	MMP12	cg09002726	PFS	0.746495	0.746088	1.03695	Higher meth.	4321
SKCM	MMP12	cg09002726	DSS	0.490898	0.49069	1.10698	Higher meth.	4321
SKCM	MMP13	cg10085326	OS	0.20979	0.210378	0.844462	Lower meth.	4322
SKCM	MMP13	cg10085326	PFS	0.509062	0.510398	0.929263	Lower meth.	4322
SKCM	MMP13	cg10085326	DSS	0.245695	0.246305	0.844042	Lower meth.	4322
SKCM	MMP14	cg26255831	OS	0.00100847	0.00110492	0.640336	Lower meth.	4323
SKCM	MMP14	cg26255831	PFS	0.0288779	0.0292533	0.779407	Lower meth.	4323
SKCM	MMP14	cg26255831	DSS	0.01301	0.0135199	0.693621	Lower meth.	4323
SKCM	MMP2	cg00355286	OS	0.623186	0.623082	1.06907	Higher meth.	4313
SKCM	MMP2	cg00355286	PFS	0.834073	0.832632	1.0239	Higher meth.	4313
SKCM	MMP2	cg00355286	DSS	0.597854	0.597754	1.081	Higher meth.	4313
SKCM	MMP3	cg16466334	OS	0.350015	0.350411	0.881582	Lower meth.	4314
SKCM	MMP3	cg16466334	PFS	0.254186	0.255102	0.880563	Lower meth.	4314
SKCM	MMP3	cg16466334	DSS	0.401409	0.401788	0.88456	Lower meth.	4314
SKCM	MMP9	cg00732815	OS	0.168114	0.168561	1.20503	Higher meth.	4318
SKCM	MMP9	cg00732815	PFS	0.354967	0.354925	1.10955	Higher meth.	4318
SKCM	MMP9	cg00732815	DSS	0.151057	0.15165	1.23431	Higher meth.	4318
SKCM	PECAM1	cg00427260	OS	0.00343373	0.00364835	1.49383	Higher meth.	5175
SKCM	PECAM1	cg00427260	PFS	0.319609	0.319628	1.11863	Higher meth.	5175
SKCM	PECAM1	cg00427260	DSS	0.000902266	0.00101557	1.64301	Higher meth.	5175
SKCM	SERPINE1	cg17968347	OS	0.78712	0.787305	1.03718	Higher meth.	5054
SKCM	SERPINE1	cg17968347	PFS	0.61193	0.611457	0.944399	Lower meth.	5054
SKCM	SERPINE1	cg17968347	DSS	0.654082	0.654356	1.06795	Higher meth.	5054
SKCM	SPP1	cg00088885	OS	0.467841	0.468227	0.906805	Lower meth.	6696
SKCM	SPP1	cg00088885	PFS	0.251195	0.251173	1.13647	Higher meth.	6696
SKCM	SPP1	cg00088885	DSS	0.36012	0.360653	0.874803	Lower meth.	6696
SKCM	TIMP2	cg24331786	OS	0.0273674	0.0279531	0.741573	Lower meth.	7077
SKCM	TIMP2	cg24331786	PFS	0.598532	0.599677	0.942873	Lower meth.	7077
SKCM	TIMP2	cg24331786	DSS	0.0908677	0.0917779	0.779531	Lower meth.	7077
SKCM	TNF	cg21467614	OS	0.315466	0.315637	1.14527	Higher meth.	7124
SKCM	TNF	cg21467614	PFS	0.171018	0.170905	1.16524	Higher meth.	7124
SKCM	TNF	cg21467614	DSS	0.160621	0.161234	1.22912	Higher meth.	7124
SKCM	TNFRSF11B	cg07083896	OS	0.0968328	0.0975112	0.798083	Lower meth.	4982
SKCM	TNFRSF11B	cg07083896	PFS	0.182858	0.183633	0.861641	Lower meth.	4982
SKCM	TNFRSF11B	cg07083896	DSS	0.0160596	0.016607	0.70033	Lower meth.	4982
STAD	FGF2	cg12632152	OS	0.629471	0.629983	0.924017	Lower meth.	2247
STAD	FGF2	cg12632152	PFS	0.733021	0.732655	0.951145	Lower meth.	2247
STAD	FGF2	cg12632152	DSS	0.300265	0.301186	0.810246	Lower meth.	2247
STAD	FGF2	cg12632152	DFI	0.687457	0.687143	1.12661	Higher meth.	2247
STAD	ICAM1	cg12151124	OS	0.0566428	0.0576352	1.36656	Higher meth.	3383
STAD	ICAM1	cg12151124	PFS	0.0586793	0.059445	1.31995	Higher meth.	3383
STAD	ICAM1	cg12151124	DSS	0.186101	0.187506	1.30436	Higher meth.	3383
STAD	ICAM1	cg12151124	DFI	0.0632606	0.0667778	1.73183	Higher meth.	3383
STAD	ICAM3	cg05323251	OS	0.683406	0.682282	1.0695	Higher meth.	3385
STAD	ICAM3	cg05323251	PFS	0.869076	0.869784	1.02436	Higher meth.	3385
STAD	ICAM3	cg05323251	DSS	0.700089	0.699615	1.0809	Higher meth.	3385
STAD	ICAM3	cg05323251	DFI	0.767265	0.767379	1.09127	Higher meth.	3385
STAD	ITGA2	cg08874888	OS	0.00280089	0.00309507	0.607455	Lower meth.	3673
STAD	ITGA2	cg08874888	PFS	0.0129	0.0134435	0.69266	Lower meth.	3673
STAD	ITGA2	cg08874888	DSS	4.8331e-05	8.1768e-05	0.41868	Lower meth.	3673
STAD	ITGA2	cg08874888	DFI	0.314744	0.316525	0.74392	Lower meth.	3673
STAD	LCP1	cg04341806	OS	0.747635	0.749078	0.948967	Lower meth.	3936
STAD	LCP1	cg04341806	PFS	0.766007	0.764942	0.957144	Lower meth.	3936
STAD	LCP1	cg04341806	DSS	0.849464	0.850492	0.962669	Lower meth.	3936
STAD	LCP1	cg04341806	DFI	0.952775	0.952774	0.98268	Lower meth.	3936
STAD	MMP1	cg16575408	OS	0.414298	0.414705	0.874983	Lower meth.	4312
STAD	MMP1	cg16575408	PFS	0.395773	0.396892	0.88322	Lower meth.	4312
STAD	MMP1	cg16575408	DSS	0.594064	0.594228	0.898223	Lower meth.	4312
STAD	MMP1	cg16575408	DFI	0.708028	0.707682	0.895229	Lower meth.	4312
STAD	MMP10	cg02061229	OS	0.512767	0.51387	1.11275	Higher meth.	4319
STAD	MMP10	cg02061229	PFS	0.410863	0.411299	1.12799	Higher meth.	4319
STAD	MMP10	cg02061229	DSS	0.82767	0.828582	1.04452	Higher meth.	4319
STAD	MMP10	cg02061229	DFI	0.722871	0.723053	1.11039	Higher meth.	4319
STAD	MMP12	cg20487452	OS	0.718511	0.718022	0.942632	Lower meth.	4321
STAD	MMP12	cg20487452	PFS	0.68903	0.68864	0.942982	Lower meth.	4321
STAD	MMP12	cg20487452	DSS	0.864634	0.864204	0.966138	Lower meth.	4321
STAD	MMP12	cg20487452	DFI	0.834454	0.833997	0.939892	Lower meth.	4321
STAD	MMP13	cg10085326	OS	0.203614	0.204296	1.23143	Higher meth.	4322
STAD	MMP13	cg10085326	PFS	0.370252	0.370526	1.14021	Higher meth.	4322
STAD	MMP13	cg10085326	DSS	0.291813	0.292942	1.23676	Higher meth.	4322
STAD	MMP13	cg10085326	DFI	0.460878	0.462795	1.24457	Higher meth.	4322
STAD	MMP14	cg10418289	OS	0.124068	0.125259	0.777024	Lower meth.	4323
STAD	MMP14	cg10418289	PFS	0.315091	0.315783	0.863006	Lower meth.	4323
STAD	MMP14	cg10418289	DSS	0.291216	0.291998	0.808246	Lower meth.	4323
STAD	MMP14	cg10418289	DFI	0.642564	0.642914	0.871722	Lower meth.	4323
STAD	MMP2	cg04862799	OS	0.00261722	0.00288866	0.608668	Lower meth.	4313
STAD	MMP2	cg04862799	PFS	0.0245493	0.0253322	0.719187	Lower meth.	4313
STAD	MMP2	cg04862799	DSS	0.00219152	0.00257366	0.535318	Lower meth.	4313
STAD	MMP2	cg04862799	DFI	0.155749	0.158841	0.657295	Lower meth.	4313
STAD	MMP3	cg18113270	OS	0.169869	0.170841	0.798973	Lower meth.	4314
STAD	MMP3	cg18113270	PFS	0.681402	0.68157	0.94168	Lower meth.	4314
STAD	MMP3	cg18113270	DSS	0.0346555	0.0361115	0.650751	Lower meth.	4314
STAD	MMP3	cg18113270	DFI	0.489644	0.49012	1.22984	Higher meth.	4314
STAD	MMP9	cg26132320	OS	0.109656	0.110901	0.769307	Lower meth.	4318
STAD	MMP9	cg26132320	PFS	0.178939	0.179711	0.821213	Lower meth.	4318
STAD	MMP9	cg26132320	DSS	0.034681	0.0361547	0.650382	Lower meth.	4318
STAD	MMP9	cg26132320	DFI	0.56454	0.566066	0.844159	Lower meth.	4318
STAD	PECAM1	cg00427260	OS	0.0989266	0.100021	0.762954	Lower meth.	5175
STAD	PECAM1	cg00427260	PFS	0.168143	0.168391	0.816949	Lower meth.	5175
STAD	PECAM1	cg00427260	DSS	0.0595319	0.0612595	0.682105	Lower meth.	5175
STAD	PECAM1	cg00427260	DFI	0.171233	0.174155	0.666579	Lower meth.	5175
STAD	SERPINE1	cg01975495	OS	0.930112	0.931028	0.985918	Lower meth.	5054
STAD	SERPINE1	cg01975495	PFS	0.844491	0.843929	0.971539	Lower meth.	5054
STAD	SERPINE1	cg01975495	DSS	0.937921	0.937589	1.01594	Higher meth.	5054
STAD	SERPINE1	cg01975495	DFI	0.790999	0.791645	0.924859	Lower meth.	5054
STAD	SPP1	cg00088885	OS	0.304169	0.305116	1.18266	Higher meth.	6696
STAD	SPP1	cg00088885	PFS	0.364747	0.365395	1.14177	Higher meth.	6696
STAD	SPP1	cg00088885	DSS	0.170828	0.172319	1.31808	Higher meth.	6696
STAD	SPP1	cg00088885	DFI	0.638885	0.638087	1.14904	Higher meth.	6696
STAD	TIMP2	cg13694343	OS	0.344408	0.345521	0.856263	Lower meth.	7077
STAD	TIMP2	cg13694343	PFS	0.801218	0.800732	0.963625	Lower meth.	7077
STAD	TIMP2	cg13694343	DSS	0.707305	0.707794	0.927205	Lower meth.	7077
STAD	TIMP2	cg13694343	DFI	0.40127	0.402064	1.28161	Higher meth.	7077
STAD	TNF	cg21370522	OS	0.804088	0.803508	1.04152	Higher meth.	7124
STAD	TNF	cg21370522	PFS	0.41086	0.410782	0.8863	Lower meth.	7124
STAD	TNF	cg21370522	DSS	0.769316	0.769539	0.942656	Lower meth.	7124
STAD	TNF	cg21370522	DFI	0.174368	0.177223	0.664879	Lower meth.	7124
STAD	TNFRSF11B	cg19620294	OS	0.196403	0.197038	0.809396	Lower meth.	4982
STAD	TNFRSF11B	cg19620294	PFS	0.29472	0.29479	0.857648	Lower meth.	4982
STAD	TNFRSF11B	cg19620294	DSS	0.0641223	0.0656764	0.688062	Lower meth.	4982
STAD	TNFRSF11B	cg19620294	DFI	0.203919	0.206705	0.684828	Lower meth.	4982
TGCT	FGF2	cg03941587	OS	0.991843	0.991843	1.01028	Higher meth.	2247
TGCT	FGF2	cg03941587	PFS	0.875545	0.875559	0.948848	Lower meth.	2247
TGCT	FGF2	cg03941587	DSS	0.565897	0.573507	1.99259	Higher meth.	2247
TGCT	FGF2	cg03941587	DFI	0.878239	0.878256	1.06095	Higher meth.	2247
TGCT	ICAM1	cg12151124	OS	0.948599	0.948608	0.93755	Lower meth.	3383
TGCT	ICAM1	cg12151124	PFS	0.115747	0.120003	1.72702	Higher meth.	3383
TGCT	ICAM1	cg12151124	DSS	0.625575	0.630523	1.80276	Higher meth.	3383
TGCT	ICAM1	cg12151124	DFI	0.155082	0.160235	1.76269	Higher meth.	3383
TGCT	ICAM3	cg14145194	OS	0.466889	0.478604	2.29223	Higher meth.	3385
TGCT	ICAM3	cg14145194	PFS	0.189407	0.193002	1.58135	Higher meth.	3385
TGCT	ICAM3	cg14145194	DSS	0.589711	0.596173	1.91386	Higher meth.	3385
TGCT	ICAM3	cg14145194	DFI	0.408117	0.410017	1.38942	Higher meth.	3385
TGCT	ITGA2	cg08874888	OS	0.495007	0.505093	2.18028	Higher meth.	3673
TGCT	ITGA2	cg08874888	PFS	0.192592	0.196189	1.57434	Higher meth.	3673
TGCT	ITGA2	cg08874888	DSS	0.625575	0.630523	1.80276	Higher meth.	3673
TGCT	ITGA2	cg08874888	DFI	0.430161	0.431881	1.36718	Higher meth.	3673
TGCT	LCP1	cg17771150	OS	0.993424	0.993424	0.991792	Lower meth.	3936
TGCT	LCP1	cg17771150	PFS	0.0740817	0.0785425	1.8469	Higher meth.	3936
TGCT	LCP1	cg17771150	DSS	0.580529	0.587423	1.94356	Higher meth.	3936
TGCT	LCP1	cg17771150	DFI	0.116889	0.122659	1.85227	Higher meth.	3936
TGCT	MMP1	cg14543953	OS	0.949214	0.949222	0.938278	Lower meth.	4312
TGCT	MMP1	cg14543953	PFS	0.18834	0.191857	1.57145	Higher meth.	4312
TGCT	MMP1	cg14543953	DSS	0.624981	0.629954	1.80443	Higher meth.	4312
TGCT	MMP1	cg14543953	DFI	0.374756	0.37698	1.42363	Higher meth.	4312
TGCT	MMP10	cg02061229	OS	0.353466	0.374281	2.79089	Higher meth.	4319
TGCT	MMP10	cg02061229	PFS	0.701416	0.701608	1.13774	Higher meth.	4319
TGCT	MMP10	cg02061229	DSS	0.611581	0.617088	1.8452	Higher meth.	4319
TGCT	MMP10	cg02061229	DFI	0.877906	0.877924	0.94223	Lower meth.	4319
TGCT	MMP12	cg09002726	OS	0.956279	0.956285	0.946643	Lower meth.	4321
TGCT	MMP12	cg09002726	PFS	0.359918	0.361752	1.36543	Higher meth.	4321
TGCT	MMP12	cg09002726	DSS	0.617819	0.623075	1.82593	Higher meth.	4321
TGCT	MMP12	cg09002726	DFI	0.693263	0.693529	1.16801	Higher meth.	4321
TGCT	MMP13	cg10085326	OS	0.477979	0.489035	2.24705	Higher meth.	4322
TGCT	MMP13	cg10085326	PFS	0.494366	0.49528	1.26397	Higher meth.	4322
TGCT	MMP13	cg10085326	DSS	0.603868	0.609701	1.86899	Higher meth.	4322
TGCT	MMP13	cg10085326	DFI	0.44483	0.446381	1.34963	Higher meth.	4322
TGCT	MMP14	cg05931439	OS	0.450242	0.462983	0.423228	Lower meth.	4323
TGCT	MMP14	cg05931439	PFS	0.427849	0.429167	0.763046	Lower meth.	4323
TGCT	MMP14	cg05931439	DSS	0.568421	0.575903	0.50401	Lower meth.	4323
[truncated: 379 more rows]
