# Supplementary material for: Pan-cancer analyses of senescence-related genes in extracellular matrix characterization in cancer
Source: Discov Oncol. 2023 Nov 20;14:208. doi: 10.1007/s12672-023-00828-7 (PMC10660488; doi:10.1007/s12672-023-00828-7)
Supplement: Supplementary file 24 — Supplementary file24 (XLSX 24 KB) [file 12672_2023_828_MOESM24_ESM.xlsx]

## Sheet: SheetName
Table S19 The detailed information about the SNV in pan-cancer
cancertype	symbol	EffectiveMut	NonEffectiveMut	sample_size	percentage	entrez
ACC	ICAM1	1	2	92	1.08696	3383
ACC	ITGA2	1	0	92	1.08696	3673
ACC	MMP12	0	1	92	0	4321
ACC	MMP9	1	0	92	1.08696	4318
ACC	SERPINE1	1	0	92	1.08696	5054
BLCA	FGF2	0	2	411	0	2247
BLCA	ICAM1	7	2	411	1.70316	3383
BLCA	ICAM3	3	2	411	0.729927	3385
BLCA	ITGA2	7	6	411	1.70316	3673
BLCA	LCP1	4	3	411	0.973236	3936
BLCA	MMP1	4	1	411	0.973236	4312
BLCA	MMP10	6	3	411	1.45985	4319
BLCA	MMP12	0	3	411	0	4321
BLCA	MMP13	4	2	411	0.973236	4322
BLCA	MMP14	4	5	411	0.973236	4323
BLCA	MMP2	9	4	411	2.18978	4313
BLCA	MMP3	2	2	411	0.486618	4314
BLCA	MMP9	7	6	411	1.70316	4318
BLCA	SERPINE1	6	2	411	1.45985	5054
BLCA	SPP1	2	1	411	0.486618	6696
BLCA	TIMP2	4	3	411	0.973236	7077
BLCA	TNF	3	3	411	0.729927	7124
BLCA	TNFRSF11B	2	2	411	0.486618	4982
BRCA	FGF2	2	1	1026	0.194932	2247
BRCA	ICAM1	6	1	1026	0.584795	3383
BRCA	ICAM3	2	1	1026	0.194932	3385
BRCA	ITGA2	7	3	1026	0.682261	3673
BRCA	LCP1	6	0	1026	0.584795	3936
BRCA	MMP1	2	0	1026	0.194932	4312
BRCA	MMP10	3	0	1026	0.292398	4319
BRCA	MMP12	0	4	1026	0	4321
BRCA	MMP13	4	2	1026	0.389864	4322
BRCA	MMP14	6	2	1026	0.584795	4323
BRCA	MMP2	4	3	1026	0.389864	4313
BRCA	MMP3	4	1	1026	0.389864	4314
BRCA	MMP9	6	4	1026	0.584795	4318
BRCA	SERPINE1	6	8	1026	0.584795	5054
BRCA	SPP1	5	1	1026	0.487329	6696
BRCA	TIMP2	0	3	1026	0	7077
BRCA	TNFRSF11B	5	4	1026	0.487329	4982
CESC	FGF2	1	1	291	0.343643	2247
CESC	ICAM1	2	2	291	0.687285	3383
CESC	ICAM3	4	4	291	1.37457	3385
CESC	ITGA2	5	3	291	1.71821	3673
CESC	LCP1	1	3	291	0.343643	3936
CESC	MMP1	5	1	291	1.71821	4312
CESC	MMP10	2	2	291	0.687285	4319
CESC	MMP12	0	4	291	0	4321
CESC	MMP13	0	2	291	0	4322
CESC	MMP14	1	3	291	0.343643	4323
CESC	MMP2	6	2	291	2.06186	4313
CESC	MMP3	3	1	291	1.03093	4314
CESC	MMP9	2	1	291	0.687285	4318
CESC	SERPINE1	1	2	291	0.343643	5054
CESC	SPP1	4	2	291	1.37457	6696
CESC	TIMP2	3	2	291	1.03093	7077
CESC	TNF	0	1	291	0	7124
CESC	TNFRSF11B	4	2	291	1.37457	4982
CHOL	ICAM1	1	0	36	2.77778	3383
CHOL	MMP9	1	0	36	2.77778	4318
COAD	FGF2	4	7	407	0.982801	2247
COAD	ICAM1	6	5	407	1.4742	3383
COAD	ICAM3	2	3	407	0.4914	3385
COAD	ITGA2	9	6	407	2.2113	3673
COAD	LCP1	8	3	407	1.9656	3936
COAD	MMP1	5	3	407	1.2285	4312
COAD	MMP10	8	1	407	1.9656	4319
COAD	MMP12	0	13	407	0	4321
COAD	MMP13	10	5	407	2.457	4322
COAD	MMP14	6	6	407	1.4742	4323
COAD	MMP2	10	6	407	2.457	4313
COAD	MMP3	10	6	407	2.457	4314
COAD	MMP9	17	3	407	4.1769	4318
COAD	SERPINE1	7	6	407	1.7199	5054
COAD	SPP1	5	4	407	1.2285	6696
COAD	TIMP2	2	3	407	0.4914	7077
COAD	TNF	1	1	407	0.2457	7124
COAD	TNFRSF11B	7	3	407	1.7199	4982
DLBC	ITGA2	1	0	37	2.7027	3673
DLBC	MMP2	2	0	37	5.40541	4313
DLBC	TNF	1	1	37	2.7027	7124
ESCA	FGF2	0	1	185	0	2247
ESCA	ICAM1	1	3	185	0.540541	3383
ESCA	ICAM3	1	0	185	0.540541	3385
ESCA	ITGA2	4	0	185	2.16216	3673
ESCA	LCP1	1	2	185	0.540541	3936
ESCA	MMP1	0	2	185	0	4312
ESCA	MMP10	1	0	185	0.540541	4319
ESCA	MMP13	1	3	185	0.540541	4322
ESCA	MMP14	2	1	185	1.08108	4323
ESCA	MMP2	3	1	185	1.62162	4313
ESCA	MMP3	1	1	185	0.540541	4314
ESCA	MMP9	3	2	185	1.62162	4318
ESCA	SERPINE1	0	1	185	0	5054
ESCA	SPP1	0	1	185	0	6696
ESCA	TNFRSF11B	0	2	185	0	4982
GBM	FGF2	1	1	403	0.248139	2247
GBM	ICAM1	1	3	403	0.248139	3383
GBM	ICAM3	1	0	403	0.248139	3385
GBM	ITGA2	4	0	403	0.992556	3673
GBM	LCP1	2	1	403	0.496278	3936
GBM	MMP1	3	2	403	0.744417	4312
GBM	MMP10	4	2	403	0.992556	4319
GBM	MMP12	1	4	403	0.248139	4321
GBM	MMP13	6	1	403	1.48883	4322
GBM	MMP14	3	3	403	0.744417	4323
GBM	MMP2	2	2	403	0.496278	4313
GBM	MMP3	8	3	403	1.98511	4314
GBM	MMP9	3	2	403	0.744417	4318
GBM	SERPINE1	2	2	403	0.496278	5054
GBM	SPP1	3	0	403	0.744417	6696
GBM	TIMP2	1	0	403	0.248139	7077
GBM	TNF	1	1	403	0.248139	7124
GBM	TNFRSF11B	3	2	403	0.744417	4982
HNSC	FGF2	1	1	509	0.196464	2247
HNSC	ICAM1	6	3	509	1.17878	3383
HNSC	ICAM3	3	2	509	0.589391	3385
HNSC	ITGA2	6	5	509	1.17878	3673
HNSC	LCP1	14	0	509	2.75049	3936
HNSC	MMP1	5	2	509	0.982318	4312
HNSC	MMP10	7	1	509	1.37525	4319
HNSC	MMP12	0	7	509	0	4321
HNSC	MMP13	7	1	509	1.37525	4322
HNSC	MMP14	4	6	509	0.785855	4323
HNSC	MMP2	5	4	509	0.982318	4313
HNSC	MMP3	2	1	509	0.392927	4314
HNSC	MMP9	1	1	509	0.196464	4318
HNSC	SERPINE1	7	3	509	1.37525	5054
HNSC	SPP1	2	2	509	0.392927	6696
HNSC	TIMP2	1	1	509	0.196464	7077
HNSC	TNF	0	1	509	0	7124
HNSC	TNFRSF11B	1	4	509	0.196464	4982
KICH	ICAM1	1	0	66	1.51515	3383
KICH	ITGA2	1	0	66	1.51515	3673
KICH	MMP12	0	2	66	0	4321
KICH	MMP3	0	1	66	0	4314
KICH	MMP9	0	1	66	0	4318
KIRC	FGF2	1	0	370	0.27027	2247
KIRC	ICAM3	1	0	370	0.27027	3385
KIRC	ITGA2	1	1	370	0.27027	3673
KIRC	MMP1	0	1	370	0	4312
KIRC	MMP10	2	0	370	0.540541	4319
KIRC	MMP12	0	3	370	0	4321
KIRC	MMP14	1	0	370	0.27027	4323
KIRC	MMP2	2	2	370	0.540541	4313
KIRC	MMP3	1	0	370	0.27027	4314
KIRC	MMP9	3	0	370	0.810811	4318
KIRC	SERPINE1	0	1	370	0	5054
KIRC	SPP1	2	0	370	0.540541	6696
KIRC	TNF	1	1	370	0.27027	7124
KIRC	TNFRSF11B	1	0	370	0.27027	4982
KIRP	ICAM1	1	1	282	0.35461	3383
KIRP	ICAM3	0	1	282	0	3385
KIRP	ITGA2	0	2	282	0	3673
KIRP	MMP1	0	1	282	0	4312
KIRP	MMP10	2	0	282	0.70922	4319
KIRP	MMP13	2	1	282	0.70922	4322
KIRP	MMP14	1	0	282	0.35461	4323
KIRP	MMP3	0	1	282	0	4314
KIRP	SERPINE1	0	1	282	0	5054
KIRP	TIMP2	0	1	282	0	7077
KIRP	TNF	1	1	282	0.35461	7124
LGG	ICAM1	2	1	526	0.380228	3383
LGG	ICAM3	0	1	526	0	3385
LGG	ITGA2	2	2	526	0.380228	3673
LGG	LCP1	2	1	526	0.380228	3936
LGG	MMP1	0	2	526	0	4312
LGG	MMP10	5	1	526	0.95057	4319
LGG	MMP12	0	3	526	0	4321
LGG	MMP2	0	1	526	0	4313
LGG	MMP3	2	1	526	0.380228	4314
LGG	MMP9	2	0	526	0.380228	4318
LGG	SERPINE1	0	2	526	0	5054
LGG	SPP1	3	0	526	0.570342	6696
LGG	TIMP2	0	1	526	0	7077
LGG	TNF	1	1	526	0.190114	7124
LGG	TNFRSF11B	2	2	526	0.380228	4982
LIHC	ICAM1	1	2	365	0.273973	3383
LIHC	ICAM3	1	0	365	0.273973	3385
LIHC	ITGA2	3	6	365	0.821918	3673
LIHC	LCP1	2	1	365	0.547945	3936
LIHC	MMP1	1	3	365	0.273973	4312
LIHC	MMP10	3	2	365	0.821918	4319
LIHC	MMP12	0	7	365	0	4321
LIHC	MMP13	4	0	365	1.09589	4322
LIHC	MMP14	2	4	365	0.547945	4323
LIHC	MMP2	2	1	365	0.547945	4313
LIHC	MMP3	3	1	365	0.821918	4314
LIHC	MMP9	2	1	365	0.547945	4318
LIHC	SERPINE1	1	1	365	0.273973	5054
LIHC	SPP1	0	1	365	0	6696
LIHC	TNF	2	0	365	0.547945	7124
LIHC	TNFRSF11B	3	0	365	0.821918	4982
LUAD	FGF2	3	1	567	0.529101	2247
LUAD	ICAM1	2	5	567	0.352734	3383
LUAD	ICAM3	3	4	567	0.529101	3385
LUAD	ITGA2	23	5	567	4.05644	3673
LUAD	LCP1	11	2	567	1.94004	3936
LUAD	MMP1	10	4	567	1.76367	4312
LUAD	MMP10	10	5	567	1.76367	4319
LUAD	MMP12	0	14	567	0	4321
LUAD	MMP13	16	2	567	2.82187	4322
LUAD	MMP14	3	1	567	0.529101	4323
LUAD	MMP2	21	12	567	3.7037	4313
LUAD	MMP3	7	6	567	1.23457	4314
LUAD	MMP9	10	9	567	1.76367	4318
LUAD	SERPINE1	13	3	567	2.29277	5054
LUAD	SPP1	5	2	567	0.881834	6696
LUAD	TIMP2	2	1	567	0.352734	7077
LUAD	TNF	2	1	567	0.352734	7124
LUAD	TNFRSF11B	3	1	567	0.529101	4982
LUSC	FGF2	2	0	485	0.412371	2247
LUSC	ICAM1	4	1	485	0.824742	3383
LUSC	ICAM3	4	5	485	0.824742	3385
LUSC	ITGA2	13	3	485	2.68041	3673
LUSC	LCP1	12	7	485	2.47423	3936
LUSC	MMP1	4	1	485	0.824742	4312
LUSC	MMP10	3	1	485	0.618557	4319
LUSC	MMP12	0	6	485	0	4321
LUSC	MMP13	2	1	485	0.412371	4322
LUSC	MMP14	6	1	485	1.23711	4323
LUSC	MMP2	8	7	485	1.64948	4313
LUSC	MMP3	2	3	485	0.412371	4314
LUSC	MMP9	14	5	485	2.8866	4318
LUSC	SERPINE1	5	4	485	1.03093	5054
LUSC	SPP1	4	3	485	0.824742	6696
LUSC	TIMP2	5	2	485	1.03093	7077
LUSC	TNF	5	1	485	1.03093	7124
LUSC	TNFRSF11B	7	3	485	1.4433	4982
MESO	MMP12	0	1	82	0	4321
MESO	MMP13	0	1	82	0	4322
MESO	MMP2	1	1	82	1.21951	4313
MESO	TNF	0	1	82	0	7124
OV	FGF2	1	0	412	0.242718	2247
OV	ICAM1	2	0	412	0.485437	3383
OV	ICAM3	1	0	412	0.242718	3385
OV	ITGA2	6	1	412	1.45631	3673
OV	LCP1	2	3	412	0.485437	3936
OV	MMP1	1	0	412	0.242718	4312
OV	MMP10	2	2	412	0.485437	4319
OV	MMP12	0	2	412	0	4321
OV	MMP13	4	0	412	0.970874	4322
OV	MMP14	0	2	412	0	4323
OV	MMP2	2	6	412	0.485437	4313
OV	MMP3	1	2	412	0.242718	4314
OV	MMP9	5	4	412	1.21359	4318
OV	SERPINE1	3	1	412	0.728155	5054
OV	SPP1	2	0	412	0.485437	6696
OV	TNF	2	1	412	0.485437	7124
OV	TNFRSF11B	4	0	412	0.970874	4982
PAAD	FGF2	1	1	178	0.561798	2247
PAAD	ICAM1	1	0	178	0.561798	3383
PAAD	ICAM3	1	0	178	0.561798	3385
PAAD	ITGA2	1	0	178	0.561798	3673
PAAD	LCP1	3	1	178	1.68539	3936
PAAD	MMP1	1	0	178	0.561798	4312
PAAD	MMP10	1	0	178	0.561798	4319
PAAD	MMP12	0	1	178	0	4321
PAAD	MMP13	0	1	178	0	4322
PAAD	MMP14	1	1	178	0.561798	4323
PAAD	MMP2	1	1	178	0.561798	4313
PAAD	MMP3	2	0	178	1.1236	4314
PAAD	MMP9	1	1	178	0.561798	4318
PAAD	SERPINE1	1	2	178	0.561798	5054
PAAD	SPP1	0	1	178	0	6696
PAAD	TIMP2	0	1	178	0	7077
PAAD	TNFRSF11B	1	0	178	0.561798	4982
PCPG	LCP1	0	1	184	0	3936
PCPG	MMP14	1	0	184	0.543478	4323
PCPG	MMP2	1	0	184	0.543478	4313
PRAD	FGF2	0	1	498	0	2247
PRAD	ICAM1	2	1	498	0.401606	3383
PRAD	ICAM3	1	0	498	0.200803	3385
PRAD	ITGA2	5	0	498	1.00402	3673
PRAD	LCP1	1	1	498	0.200803	3936
PRAD	MMP12	0	3	498	0	4321
PRAD	MMP13	1	0	498	0.200803	4322
PRAD	MMP3	0	1	498	0	4314
PRAD	MMP9	4	0	498	0.803213	4318
PRAD	SERPINE1	0	3	498	0	5054
PRAD	TIMP2	0	1	498	0	7077
PRAD	TNF	1	0	498	0.200803	7124
PRAD	TNFRSF11B	2	0	498	0.401606	4982
READ	FGF2	0	2	149	0	2247
READ	ICAM1	1	0	149	0.671141	3383
READ	ICAM3	1	0	149	0.671141	3385
READ	ITGA2	3	3	149	2.01342	3673
READ	LCP1	2	2	149	1.34228	3936
READ	MMP1	2	2	149	1.34228	4312
READ	MMP10	2	0	149	1.34228	4319
READ	MMP12	0	2	149	0	4321
READ	MMP13	2	3	149	1.34228	4322
READ	MMP14	2	2	149	1.34228	4323
READ	MMP2	5	2	149	3.3557	4313
READ	MMP3	2	1	149	1.34228	4314
READ	MMP9	4	2	149	2.68456	4318
READ	SERPINE1	2	1	149	1.34228	5054
READ	TIMP2	0	1	149	0	7077
READ	TNFRSF11B	2	2	149	1.34228	4982
SARC	ICAM1	0	1	239	0	3383
SARC	ITGA2	2	0	239	0.83682	3673
SARC	LCP1	0	1	239	0	3936
SARC	MMP1	2	1	239	0.83682	4312
SARC	MMP10	2	0	239	0.83682	4319
SARC	MMP12	0	2	239	0	4321
SARC	MMP13	0	1	239	0	4322
SARC	MMP14	0	1	239	0	4323
SARC	MMP2	1	0	239	0.41841	4313
SARC	MMP3	2	0	239	0.83682	4314
SARC	MMP9	2	0	239	0.83682	4318
SARC	SERPINE1	1	0	239	0.41841	5054
SARC	TIMP2	1	0	239	0.41841	7077
SARC	TNF	3	0	239	1.25523	7124
SARC	TNFRSF11B	0	1	239	0	4982
SKCM	FGF2	6	4	468	1.28205	2247
SKCM	ICAM1	15	8	468	3.20513	3383
SKCM	ICAM3	7	15	468	1.49573	3385
SKCM	ITGA2	39	11	468	8.33333	3673
SKCM	LCP1	13	5	468	2.77778	3936
SKCM	MMP1	26	14	468	5.55556	4312
SKCM	MMP10	25	7	468	5.34188	4319
SKCM	MMP12	1	27	468	0.213675	4321
SKCM	MMP13	30	18	468	6.41026	4322
SKCM	MMP14	13	5	468	2.77778	4323
SKCM	MMP2	20	11	468	4.2735	4313
SKCM	MMP3	23	14	468	4.91453	4314
SKCM	MMP9	14	8	468	2.99145	4318
SKCM	SERPINE1	7	6	468	1.49573	5054
SKCM	SPP1	9	5	468	1.92308	6696
SKCM	TIMP2	4	3	468	0.854701	7077
SKCM	TNF	1	10	468	0.213675	7124
SKCM	TNFRSF11B	22	7	468	4.70085	4982
STAD	FGF2	4	0	439	0.911162	2247
STAD	ICAM1	4	4	439	0.911162	3383
STAD	ICAM3	4	2	439	0.911162	3385
STAD	ITGA2	9	4	439	2.05011	3673
STAD	LCP1	8	0	439	1.82232	3936
STAD	MMP1	3	1	439	0.683371	4312
STAD	MMP10	11	1	439	2.50569	4319
STAD	MMP12	0	11	439	0	4321
STAD	MMP13	4	2	439	0.911162	4322
STAD	MMP14	7	5	439	1.59453	4323
STAD	MMP2	9	14	439	2.05011	4313
STAD	MMP3	13	2	439	2.96128	4314
STAD	MMP9	17	8	439	3.87244	4318
STAD	SERPINE1	6	3	439	1.36674	5054
STAD	SPP1	6	2	439	1.36674	6696
STAD	TIMP2	2	2	439	0.455581	7077
STAD	TNF	2	0	439	0.455581	7124
STAD	TNFRSF11B	6	6	439	1.36674	4982
THCA	ICAM1	0	2	500	0	3383
THCA	ICAM3	0	1	500	0	3385
THCA	ITGA2	0	1	500	0	3673
THCA	MMP10	1	0	500	0.2	4319
THCA	MMP12	2	0	500	0.4	4321
THCA	MMP13	1	0	500	0.2	4322
THCA	MMP2	1	0	500	0.2	4313
THCA	MMP3	1	0	500	0.2	4314
THCA	TIMP2	1	0	500	0.2	7077
THCA	TNF	0	1	500	0	7124
THYM	MMP13	1	0	123	0.813008	4322
THYM	TNFRSF11B	1	0	123	0.813008	4982
UCEC	FGF2	5	14	531	0.94162	2247
UCEC	ICAM1	11	12	531	2.07156	3383
UCEC	ICAM3	20	7	531	3.76648	3385
UCEC	ITGA2	38	21	531	7.15631	3673
UCEC	LCP1	18	24	531	3.38983	3936
UCEC	MMP1	13	10	531	2.44821	4312
UCEC	MMP10	21	12	531	3.9548	4319
UCEC	MMP12	1	40	531	0.188324	4321
UCEC	MMP13	26	17	531	4.89642	4322
UCEC	MMP14	23	18	531	4.33145	4323
UCEC	MMP2	22	22	531	4.14313	4313
UCEC	MMP3	25	25	531	4.7081	4314
UCEC	MMP9	30	19	531	5.64972	4318
UCEC	SERPINE1	16	19	531	3.01318	5054
UCEC	SPP1	14	13	531	2.63653	6696
UCEC	TIMP2	12	30	531	2.25989	7077
UCEC	TNF	7	6	531	1.31827	7124
UCEC	TNFRSF11B	26	21	531	4.89642	4982
UCS	FGF2	0	1	57	0	2247
UCS	ITGA2	1	0	57	1.75439	3673
UCS	LCP1	1	0	57	1.75439	3936
UCS	MMP1	1	0	57	1.75439	4312
UCS	MMP12	0	1	57	0	4321
UCS	MMP13	0	1	57	0	4322
UCS	MMP2	1	0	57	1.75439	4313
UCS	MMP9	1	0	57	1.75439	4318
UCS	TIMP2	0	1	57	0	7077
UCS	TNFRSF11B	1	0	57	1.75439	4982
UVM	ITGA2	0	1	80	0	3673
