# Supplementary material for: Pan-cancer analyses of senescence-related genes in extracellular matrix characterization in cancer
Source: Discov Oncol. 2023 Nov 20;14:208. doi: 10.1007/s12672-023-00828-7 (PMC10660488; doi:10.1007/s12672-023-00828-7)
Supplement: Supplementary file 25 — Supplementary file25 (XLSX 50 KB) [file 12672_2023_828_MOESM25_ESM.xlsx]

## Sheet: SheetName
Table S20 The detailed information of survival difference between mutant (deleterious) and wide type in pan-cancer
cancertype	symbol	sur_type	log_rank_p	cox_p	hr	higher_risk_of_death	Mutant	WT	entrez
BLCA	ICAM1	OS	0.134555	0.141168	1.84469	Mutant	7	402	3383
BLCA	ICAM1	PFS	0.379174	0.381623	1.43662	Mutant	7	404	3383
BLCA	ICAM1	DSS	0.539867	0.542475	1.42841	Mutant	4	349	3383
BLCA	ICAM3	OS	0.194108	0.991467	3.00959e-07	WT	3	406	3385
BLCA	ICAM3	PFS	0.116966	0.993342	1.10464e-07	WT	3	408	3385
BLCA	ICAM3	DSS	0.249888	0.995113	1.10483e-07	WT	3	350	3385
BLCA	ITGA2	OS	0.552946	0.554564	0.708694	WT	7	402	3673
BLCA	ITGA2	PFS	0.586415	0.587581	0.760381	WT	7	404	3673
BLCA	ITGA2	DSS	0.467456	0.476782	0.48937	WT	5	348	3673
BLCA	ITGA2	DFI	0.795503	0.796079	1.30128	Mutant	4	158	3673
BLCA	LCP1	OS	0.45909	0.469215	0.483076	WT	4	405	3936
BLCA	LCP1	PFS	0.296164	0.316556	0.365804	WT	4	407	3936
BLCA	LCP1	DSS	0.213653	0.994755	1.08629e-07	WT	3	350	3936
BLCA	LCP1	DFI	0.346619	0.99748	3.85787e-08	WT	3	159	3936
BLCA	MMP1	OS	0.13958	0.993736	1.10058e-07	WT	4	405	4312
BLCA	MMP1	PFS	0.0774361	0.992522	1.09762e-07	WT	4	407	4312
BLCA	MMP1	DSS	0.198213	0.994548	1.09855e-07	WT	4	349	4312
BLCA	MMP1	DFI	0.354579	0.997496	3.95554e-08	WT	3	159	4312
BLCA	MMP10	OS	0.403108	0.410054	0.556349	WT	6	403	4319
BLCA	MMP10	PFS	0.190168	0.205171	0.40622	WT	6	405	4319
BLCA	MMP10	DSS	0.671497	0.673191	0.740016	WT	6	347	4319
BLCA	MMP13	OS	0.87896	0.879596	1.11379	Mutant	4	405	4322
BLCA	MMP13	PFS	0.756573	0.756636	0.802391	WT	4	407	4322
BLCA	MMP13	DSS	0.605713	0.608124	1.44161	Mutant	4	349	4322
BLCA	MMP14	OS	0.887075	0.886576	0.903458	WT	4	405	4323
BLCA	MMP14	PFS	0.44912	0.450399	1.55171	Mutant	4	407	4323
BLCA	MMP14	DSS	0.852889	0.853448	1.14093	Mutant	4	349	4323
BLCA	MMP2	OS	0.458819	0.462419	0.651337	WT	9	400	4313
BLCA	MMP2	PFS	0.445741	0.448835	0.682064	WT	9	402	4313
BLCA	MMP2	DSS	0.838765	0.839339	0.888002	WT	9	344	4313
BLCA	MMP2	DFI	0.815981	0.8164	0.789126	WT	5	157	4313
BLCA	MMP9	OS	0.438081	0.444554	0.580405	WT	7	402	4318
BLCA	MMP9	PFS	0.18616	0.201487	0.403477	WT	7	404	4318
BLCA	MMP9	DSS	0.398267	0.411475	0.43818	WT	6	347	4318
BLCA	MMP9	DFI	0.32989	0.997377	3.91268e-08	WT	3	159	4318
BLCA	SERPINE1	OS	0.0802421	0.114361	0.205078	WT	6	403	5054
BLCA	SERPINE1	PFS	0.0699501	0.0880378	0.297295	WT	6	405	5054
BLCA	SERPINE1	DSS	0.0620228	0.992201	1.0643e-07	WT	5	348	5054
BLCA	SERPINE1	DFI	0.492059	0.500448	0.503042	WT	5	157	5054
BLCA	TIMP2	OS	0.149235	0.180488	0.260353	WT	4	405	7077
BLCA	TIMP2	PFS	0.313369	0.323162	0.495452	WT	4	407	7077
BLCA	TIMP2	DSS	0.124465	0.993572	1.06589e-07	WT	3	350	7077
BLCA	TIMP2	DFI	0.852494	0.852711	1.20792	Mutant	3	159	7077
BLCA	TNF	OS	0.50997	0.51724	0.522253	WT	3	406	7124
BLCA	TNF	PFS	0.717461	0.717853	0.773573	WT	3	408	7124
BLCA	TNF	DSS	0.710857	0.712293	0.690452	WT	3	350	7124
BRCA	ICAM1	OS	0.35181	0.993873	3.0183e-07	WT	6	1019	3383
BRCA	ICAM1	PFS	0.267336	0.992702	3.0172e-07	WT	6	1019	3383
BRCA	ICAM1	DSS	0.485764	0.995414	3.01661e-07	WT	6	953	3383
BRCA	ICAM1	DFI	0.575508	0.996306	3.03444e-07	WT	4	846	3383
BRCA	ITGA2	OS	0.586747	0.591345	1.71566	Mutant	7	1018	3673
BRCA	ITGA2	PFS	0.0672843	0.0854738	3.40759	Mutant	7	1018	3673
BRCA	ITGA2	DSS	0.57018	0.996257	3.03075e-07	WT	6	953	3673
BRCA	ITGA2	DFI	0.126221	0.159206	4.14057	Mutant	6	844	3673
BRCA	LCP1	OS	0.46646	0.475869	0.485965	WT	6	1019	3936
BRCA	LCP1	PFS	0.357561	0.373398	0.407555	WT	6	1019	3936
BRCA	LCP1	DSS	0.416429	0.994761	2.87119e-07	WT	5	954	3936
BRCA	LCP1	DFI	0.471028	0.995267	3.00255e-07	WT	5	845	3936
BRCA	MMP10	OS	0.747165	0.994981	2.25141e-06	WT	3	1022	4319
BRCA	MMP10	PFS	0.664937	0.993257	2.25146e-06	WT	3	1022	4319
BRCA	MMP10	DSS	0.775161	0.995554	2.25064e-06	WT	3	956	4319
BRCA	MMP10	DFI	0.733177	0.996535	8.27499e-07	WT	3	847	4319
BRCA	MMP13	OS	0.556542	0.99403	8.2529e-07	WT	4	1021	4322
BRCA	MMP13	PFS	0.440345	0.992166	8.25181e-07	WT	4	1021	4322
BRCA	MMP13	DSS	0.623459	0.995018	8.24283e-07	WT	4	955	4322
BRCA	MMP13	DFI	0.563459	0.996191	3.03048e-07	WT	4	846	4322
BRCA	MMP14	OS	0.461857	0.471657	2.0615	Mutant	6	1019	4323
BRCA	MMP14	PFS	0.793398	0.793534	1.30036	Mutant	6	1019	4323
BRCA	MMP14	DSS	0.17163	0.201827	3.62581	Mutant	6	953	4323
BRCA	MMP14	DFI	0.54333	0.995993	3.02993e-07	WT	5	845	4323
BRCA	MMP2	OS	0.0113338	0.0230002	5.07422	Mutant	4	1021	4313
BRCA	MMP2	PFS	0.0124149	0.0242954	4.98079	Mutant	4	1021	4313
BRCA	MMP2	DSS	0.000211669	0.00227882	9.00346	Mutant	4	955	4313
BRCA	MMP2	DFI	0.0876584	0.122044	4.75898	Mutant	3	847	4313
BRCA	MMP3	OS	0.888309	0.994966	1.6673e-05	WT	4	1021	4314
BRCA	MMP3	PFS	0.840734	0.995234	6.13311e-06	WT	4	1021	4314
BRCA	MMP3	DSS	0.905163	0.99573	1.667e-05	WT	4	955	4314
BRCA	MMP3	DFI	0.882148	0.996485	6.13033e-06	WT	3	847	4314
BRCA	MMP9	OS	0.420406	0.432439	2.20306	Mutant	6	1019	4318
BRCA	MMP9	PFS	0.0316876	0.0478633	4.12444	Mutant	6	1019	4318
BRCA	MMP9	DSS	0.221956	0.248259	3.21083	Mutant	6	953	4318
BRCA	MMP9	DFI	0.00177602	0.00734543	7.01897	Mutant	6	844	4318
BRCA	SERPINE1	OS	0.620659	0.624265	1.63582	Mutant	6	1019	5054
BRCA	SERPINE1	PFS	0.70381	0.705546	1.46141	Mutant	6	1019	5054
BRCA	SERPINE1	DSS	0.67086	0.995686	8.24882e-07	WT	5	954	5054
BRCA	SERPINE1	DFI	0.296949	0.3173	2.74337	Mutant	6	844	5054
BRCA	SPP1	OS	0.132885	0.165479	4.04879	Mutant	5	1020	6696
BRCA	SPP1	PFS	0.392668	0.40634	2.30372	Mutant	5	1020	6696
BRCA	SPP1	DSS	0.0510715	0.0848104	5.72636	Mutant	5	954	6696
BRCA	SPP1	DFI	0.701013	0.996099	8.26774e-07	WT	4	846	6696
BRCA	TNFRSF11B	OS	0.548973	0.554904	1.81001	Mutant	5	1020	4982
BRCA	TNFRSF11B	PFS	0.542812	0.548897	1.82613	Mutant	5	1020	4982
BRCA	TNFRSF11B	DSS	0.258119	0.281605	2.96323	Mutant	5	954	4982
BRCA	TNFRSF11B	DFI	0.228759	0.254444	3.16108	Mutant	5	845	4982
CESC	ICAM3	OS	0.388477	0.996344	1.0998e-07	WT	4	287	3385
CESC	ICAM3	PFS	0.303087	0.995636	1.09863e-07	WT	4	287	3385
CESC	ICAM3	DSS	0.41593	0.996554	1.09793e-07	WT	4	270	3385
CESC	ICAM3	DFI	0.476379	0.996996	1.08781e-07	WT	3	157	3385
CESC	ITGA2	OS	0.261401	0.995258	1.08957e-07	WT	5	286	3673
CESC	ITGA2	PFS	0.196626	0.994554	1.08718e-07	WT	5	286	3673
CESC	ITGA2	DSS	0.296861	0.995601	1.08636e-07	WT	5	269	3673
CESC	ITGA2	DFI	0.390034	0.997678	3.94416e-08	WT	5	155	3673
CESC	MMP1	OS	0.667869	0.669473	1.3591	Mutant	5	286	4312
CESC	MMP1	PFS	0.860215	0.860623	1.13411	Mutant	5	286	4312
CESC	MMP1	DSS	0.509565	0.513715	1.60211	Mutant	5	269	4312
CESC	MMP1	DFI	0.736024	0.737519	1.40847	Mutant	4	156	4312
CESC	MMP2	OS	0.61691	0.620471	0.606651	WT	6	285	4313
CESC	MMP2	PFS	0.517472	0.524516	0.526782	WT	6	285	4313
CESC	MMP2	DSS	0.860368	0.860434	0.836964	WT	6	268	4313
CESC	MMP2	DFI	0.448791	0.996815	1.0795e-07	WT	3	157	4313
CESC	MMP3	OS	0.393001	0.996375	1.10284e-07	WT	3	288	4314
CESC	MMP3	PFS	0.307791	0.995675	1.10055e-07	WT	3	288	4314
CESC	MMP3	DSS	0.425759	0.996622	1.10096e-07	WT	3	271	4314
CESC	SPP1	OS	0.875341	0.875317	0.853565	WT	4	287	6696
CESC	SPP1	PFS	0.759083	0.759862	0.734965	WT	4	287	6696
CESC	SPP1	DSS	0.496221	0.995528	3.00975e-07	WT	3	271	6696
CESC	TIMP2	OS	0.304892	0.995659	1.09464e-07	WT	3	288	7077
CESC	TIMP2	PFS	0.261253	0.995245	1.09579e-07	WT	3	288	7077
CESC	TIMP2	DSS	0.333656	0.995917	1.09052e-07	WT	3	271	7077
CESC	TNFRSF11B	OS	0.367753	0.996181	1.10001e-07	WT	4	287	4982
CESC	TNFRSF11B	PFS	0.310555	0.9957	1.1006e-07	WT	4	287	4982
CESC	TNFRSF11B	DSS	0.398332	0.996424	1.0968e-07	WT	4	270	4982
CESC	TNFRSF11B	DFI	0.503152	0.997172	1.09075e-07	WT	3	157	4982
COAD	FGF2	OS	0.825024	0.825824	1.24811	Mutant	4	400	2247
COAD	FGF2	PFS	0.776778	0.779035	0.754338	WT	4	400	2247
COAD	FGF2	DSS	0.620317	0.624637	1.63938	Mutant	4	364	2247
COAD	ICAM1	OS	0.573118	0.577989	0.571337	WT	6	398	3383
COAD	ICAM1	PFS	0.389597	0.403278	0.432102	WT	6	398	3383
COAD	ICAM1	DSS	0.374263	0.996237	1.09794e-07	WT	5	363	3383
COAD	ICAM1	DFI	0.409805	0.997782	3.91247e-08	WT	4	154	3383
COAD	ITGA2	OS	0.573321	0.575709	0.669404	WT	9	395	3673
COAD	ITGA2	PFS	0.608023	0.608774	0.741369	WT	9	395	3673
COAD	ITGA2	DSS	0.661986	0.664268	0.645015	WT	8	360	3673
COAD	ITGA2	DFI	0.287634	0.997208	3.69041e-08	WT	5	153	3673
COAD	LCP1	OS	0.108552	0.121542	2.49429	Mutant	8	396	3936
COAD	LCP1	PFS	0.534411	0.535994	1.4364	Mutant	8	396	3936
COAD	LCP1	DSS	0.0342614	0.046156	3.28329	Mutant	8	360	3936
COAD	LCP1	DFI	0.583435	0.99768	1.09497e-07	WT	3	155	3936
COAD	MMP1	OS	0.893312	0.893817	1.14385	Mutant	5	399	4312
COAD	MMP1	PFS	0.706945	0.708215	0.686725	WT	5	399	4312
COAD	MMP1	DSS	0.674926	0.677945	1.52126	Mutant	5	363	4312
COAD	MMP10	OS	0.578912	0.583552	0.576103	WT	8	396	4319
COAD	MMP10	PFS	0.57094	0.573673	0.669686	WT	8	396	4319
COAD	MMP10	DSS	0.349835	0.996049	1.09303e-07	WT	7	361	4319
COAD	MMP10	DFI	0.546011	0.997452	1.08845e-07	WT	3	155	4319
COAD	MMP13	OS	0.849071	0.849805	1.14531	Mutant	10	394	4322
COAD	MMP13	PFS	0.9343	0.933352	0.952315	WT	10	394	4322
COAD	MMP13	DSS	0.309429	0.995714	1.08742e-07	WT	8	360	4322
COAD	MMP13	DFI	0.45558	0.997986	3.9385e-08	WT	5	153	4322
COAD	MMP14	OS	0.649576	0.651468	1.3829	Mutant	6	398	4323
COAD	MMP14	PFS	0.989441	0.988743	0.989984	WT	6	398	4323
COAD	MMP14	DSS	0.874947	0.875635	1.17162	Mutant	5	363	4323
COAD	MMP2	OS	0.775073	0.774118	1.22819	Mutant	10	394	4313
COAD	MMP2	PFS	0.86554	0.864426	1.10492	Mutant	10	394	4313
COAD	MMP2	DSS	0.883306	0.885107	0.864227	WT	9	359	4313
COAD	MMP2	DFI	0.645118	0.99805	1.09671e-07	WT	3	155	4313
COAD	MMP3	OS	0.187604	0.192803	1.73963	Mutant	10	394	4314
COAD	MMP3	PFS	0.299768	0.302375	1.49401	Mutant	10	394	4314
COAD	MMP3	DSS	0.0490517	0.0583352	2.68793	Mutant	8	360	4314
COAD	MMP3	DFI	0.0689187	0.0889201	3.57957	Mutant	4	154	4314
COAD	MMP9	OS	0.0453764	0.0520293	2.28894	Mutant	17	387	4318
COAD	MMP9	PFS	0.0822742	0.0869931	1.87045	Mutant	17	387	4318
COAD	MMP9	DSS	0.110193	0.120713	2.24581	Mutant	15	353	4318
COAD	MMP9	DFI	0.380961	0.997654	3.86599e-08	WT	6	152	4318
COAD	SERPINE1	OS	0.132422	0.148816	2.82052	Mutant	7	397	5054
COAD	SERPINE1	PFS	0.57299	0.57333	1.49439	Mutant	7	397	5054
COAD	SERPINE1	DSS	0.534319	0.537856	1.86418	Mutant	6	362	5054
COAD	SERPINE1	DFI	0.563684	0.99756	1.09248e-07	WT	3	155	5054
COAD	SPP1	OS	0.617917	0.62018	1.42684	Mutant	5	399	6696
COAD	SPP1	PFS	0.567523	0.569584	1.39509	Mutant	5	399	6696
COAD	SPP1	DSS	0.473848	0.995295	3.00798e-07	WT	3	365	6696
COAD	TNFRSF11B	OS	0.164829	0.181662	2.60692	Mutant	6	398	4982
COAD	TNFRSF11B	PFS	0.649335	0.651901	1.37946	Mutant	6	398	4982
COAD	TNFRSF11B	DSS	0.0644847	0.0835044	3.49179	Mutant	6	362	4982
ESCA	ITGA2	OS	0.0467524	0.0584459	3.07925	Mutant	4	181	3673
ESCA	ITGA2	PFS	0.00818168	0.0133414	3.60846	Mutant	4	181	3673
ESCA	ITGA2	DSS	0.00766181	0.0147307	4.36703	Mutant	4	155	3673
ESCA	MMP2	OS	0.316784	0.995763	1.09584e-07	WT	3	182	4313
ESCA	MMP2	PFS	0.557278	0.56262	0.558688	WT	3	182	4313
ESCA	MMP2	DSS	0.39111	0.996375	1.0923e-07	WT	3	156	4313
ESCA	MMP9	OS	0.675732	0.677827	0.657715	WT	3	182	4318
ESCA	MMP9	PFS	0.889341	0.891069	0.906784	WT	3	182	4318
ESCA	MMP9	DSS	0.899462	0.899439	0.87982	WT	3	156	4318
GBM	ITGA2	OS	0.798058	0.798913	1.15953	Mutant	4	393	3673
GBM	ITGA2	PFS	0.390439	0.394333	0.610035	WT	4	396	3673
GBM	ITGA2	DSS	0.71685	0.718169	1.23353	Mutant	4	354	3673
GBM	MMP1	OS	0.233298	0.246271	0.439015	WT	3	394	4312
GBM	MMP1	PFS	0.0615547	0.0794634	0.287773	WT	3	397	4312
GBM	MMP10	OS	0.871451	0.872956	1.1203	Mutant	4	393	4319
GBM	MMP10	PFS	0.643109	0.643108	0.719589	WT	4	396	4319
GBM	MMP10	DSS	0.795934	0.797865	1.1997	Mutant	4	354	4319
GBM	MMP13	OS	0.642496	0.64695	0.793907	WT	6	391	4322
GBM	MMP13	PFS	0.914964	0.91644	0.948531	WT	6	394	4322
GBM	MMP13	DSS	0.442841	0.450154	0.644664	WT	5	353	4322
GBM	MMP14	OS	0.966987	0.967235	1.0296	Mutant	3	394	4323
GBM	MMP14	PFS	0.683384	0.685247	1.33388	Mutant	3	397	4323
GBM	MMP14	DSS	0.90077	0.901166	1.09227	Mutant	3	355	4323
GBM	MMP3	OS	0.543749	0.540594	1.31848	Mutant	8	389	4314
GBM	MMP3	PFS	0.64407	0.646187	1.20841	Mutant	8	392	4314
GBM	MMP3	DSS	0.803614	0.79872	1.13734	Mutant	7	351	4314
GBM	MMP9	OS	0.474649	0.478661	0.604621	WT	3	394	4318
GBM	MMP9	PFS	0.282234	0.29342	0.474469	WT	3	397	4318
GBM	MMP9	DSS	0.494908	0.498295	0.618021	WT	3	355	4318
GBM	SPP1	OS	0.598434	0.599697	0.688831	WT	3	394	6696
GBM	SPP1	PFS	0.225468	0.238781	0.43342	WT	3	397	6696
GBM	SPP1	DSS	0.62495	0.625662	0.707011	WT	3	355	6696
GBM	TNFRSF11B	OS	0.573668	0.572994	1.38748	Mutant	3	394	4982
GBM	TNFRSF11B	PFS	0.95777	0.960852	0.97191	WT	3	397	4982
HNSC	ICAM1	OS	0.925755	0.92607	1.05549	Mutant	6	502	3383
HNSC	ICAM1	PFS	0.43383	0.43618	1.42188	Mutant	6	503	3383
HNSC	ICAM1	DSS	0.541355	0.544792	1.54057	Mutant	5	414	3383
HNSC	ICAM3	OS	0.495018	0.498476	1.61828	Mutant	3	505	3385
HNSC	ICAM3	PFS	0.730586	0.730646	1.27703	Mutant	3	506	3385
HNSC	ITGA2	OS	0.564353	0.5673	0.665873	WT	6	502	3673
HNSC	ITGA2	PFS	0.340289	0.349273	0.514436	WT	6	503	3673
HNSC	ITGA2	DSS	0.503379	0.511017	0.516761	WT	5	414	3673
HNSC	LCP1	OS	0.933784	0.933434	1.03071	Mutant	14	494	3936
HNSC	LCP1	PFS	0.696187	0.696197	0.868842	WT	14	495	3936
HNSC	LCP1	DSS	0.914625	0.914296	1.05622	Mutant	10	409	3936
HNSC	LCP1	DFI	0.65199	0.653434	1.39525	Mutant	5	110	3936
HNSC	MMP1	OS	0.558896	0.564271	0.560919	WT	5	503	4312
HNSC	MMP1	PFS	0.777893	0.778014	0.818538	WT	5	504	4312
HNSC	MMP1	DSS	0.331902	0.993632	2.99913e-07	WT	4	415	4312
HNSC	MMP10	OS	0.610852	0.613051	0.698094	WT	7	501	4319
HNSC	MMP10	PFS	0.327965	0.337702	0.5063	WT	7	502	4319
HNSC	MMP10	DSS	0.466012	0.475853	0.488731	WT	6	413	4319
HNSC	MMP13	OS	0.872928	0.872696	0.892232	WT	7	501	4322
HNSC	MMP13	PFS	0.449315	0.454458	0.58777	WT	7	502	4322
HNSC	MMP13	DSS	0.7568	0.757605	0.733314	WT	6	413	4322
HNSC	MMP14	OS	0.103283	0.115835	2.50063	Mutant	4	504	4323
HNSC	MMP14	PFS	0.251219	0.259461	1.92641	Mutant	4	505	4323
HNSC	MMP14	DSS	0.257893	0.270414	2.19676	Mutant	3	416	4323
HNSC	MMP2	OS	0.438311	0.449153	0.468187	WT	5	503	4313
HNSC	MMP2	PFS	0.601774	0.603632	0.691622	WT	5	504	4313
HNSC	MMP2	DSS	0.651744	0.654383	0.637861	WT	5	414	4313
HNSC	SERPINE1	OS	0.970893	0.971189	1.02124	Mutant	7	501	5054
HNSC	SERPINE1	PFS	0.620801	0.622114	0.751038	WT	7	502	5054
HNSC	SERPINE1	DSS	0.583799	0.588338	0.580666	WT	5	414	5054
KIRC	MMP9	OS	0.394786	0.994401	3.01709e-07	WT	3	367	4318
KIRC	MMP9	PFS	0.310569	0.993332	3.01351e-07	WT	3	365	4318
KIRC	MMP9	DSS	0.465334	0.995199	3.01289e-07	WT	3	329	4318
LGG	MMP10	OS	0.37906	0.393071	0.420259	WT	5	519	4319
LGG	MMP10	PFS	0.695844	0.69742	1.31878	Mutant	5	519	4319
LGG	MMP10	DSS	0.421741	0.432986	0.450653	WT	5	506	4319
LGG	SPP1	OS	0.6893	0.718432	0.771159	WT	3	521	6696
LGG	SPP1	PFS	0.967962	0.962743	1.03381	Mutant	3	521	6696
LGG	SPP1	DSS	0.828436	0.860931	0.881299	WT	3	508	6696
LIHC	ITGA2	OS	0.223284	0.994836	1.1002e-07	WT	3	361	3673
LIHC	ITGA2	PFS	0.291442	0.311944	0.362761	WT	3	361	3673
LIHC	ITGA2	DSS	0.297467	0.99559	1.09568e-07	WT	3	313	3673
LIHC	ITGA2	DFI	0.411725	0.424063	0.44809	WT	3	273	3673
LIHC	MMP10	OS	0.240817	0.995021	1.10295e-07	WT	3	361	4319
LIHC	MMP10	PFS	0.977548	0.978281	1.01958	Mutant	3	361	4319
LIHC	MMP10	DSS	0.323959	0.995819	1.09975e-07	WT	3	313	4319
LIHC	MMP10	DFI	0.724778	0.726332	1.28425	Mutant	3	273	4319
LIHC	MMP13	OS	0.567574	0.572669	0.566918	WT	4	360	4322
LIHC	MMP13	PFS	0.274115	0.285467	0.466198	WT	4	360	4322
LIHC	MMP13	DSS	0.837531	0.837693	0.813206	WT	4	312	4322
LIHC	MMP3	OS	0.286057	0.992992	3.00662e-07	WT	3	361	4314
LIHC	MMP3	PFS	0.843066	0.842572	0.868215	WT	3	361	4314
LIHC	MMP3	DSS	0.378847	0.996264	1.10336e-07	WT	3	313	4314
LIHC	TNFRSF11B	OS	0.47173	0.995259	3.02554e-07	WT	3	361	4982
LIHC	TNFRSF11B	PFS	0.0484165	0.0652164	3.72233	Mutant	3	361	4982
LIHC	TNFRSF11B	DSS	0.577868	0.996336	3.02109e-07	WT	3	313	4982
LUAD	FGF2	OS	0.0220452	0.0319007	3.50054	Mutant	3	505	2247
LUAD	FGF2	PFS	0.0170718	0.0261771	3.66756	Mutant	3	505	2247
LUAD	ICAM3	OS	0.319085	0.993438	3.02439e-07	WT	3	505	3385
LUAD	ICAM3	PFS	0.209116	0.991732	3.02122e-07	WT	3	505	3385
LUAD	ICAM3	DSS	0.394314	0.994394	3.01888e-07	WT	3	436	3385
LUAD	ITGA2	OS	0.842896	0.842607	0.926207	WT	21	487	3673
LUAD	ITGA2	PFS	0.397314	0.398368	0.761388	WT	21	487	3673
LUAD	ITGA2	DSS	0.824779	0.824658	0.893099	WT	18	421	3673
LUAD	ITGA2	DFI	0.892125	0.892593	0.923558	WT	11	266	3673
LUAD	LCP1	OS	0.804227	0.804663	1.15529	Mutant	10	498	3936
LUAD	LCP1	PFS	0.838385	0.838334	0.902183	WT	10	498	3936
LUAD	LCP1	DSS	0.83074	0.831104	1.16475	Mutant	9	430	3936
LUAD	LCP1	DFI	0.72884	0.729982	0.706522	WT	4	273	3936
LUAD	MMP1	OS	0.544119	0.546021	1.35793	Mutant	8	500	4312
LUAD	MMP1	PFS	0.684161	0.684157	0.814411	WT	8	500	4312
LUAD	MMP1	DSS	0.749214	0.750107	0.725945	WT	5	434	4312
LUAD	MMP1	DFI	0.726697	0.727891	0.704394	WT	3	274	4312
LUAD	MMP10	OS	0.023887	0.990545	1.06791e-07	WT	10	498	4319
LUAD	MMP10	PFS	0.158006	0.16908	0.449792	WT	10	498	4319
LUAD	MMP10	DSS	0.0555815	0.99485	3.9062e-08	WT	10	429	4319
LUAD	MMP10	DFI	0.21736	0.243755	0.30956	WT	7	270	4319
LUAD	MMP13	OS	0.912057	0.912927	0.946153	WT	15	493	4322
LUAD	MMP13	PFS	0.112468	0.117115	1.75947	Mutant	15	493	4322
LUAD	MMP13	DSS	0.381489	0.396615	0.426619	WT	12	427	4322
LUAD	MMP13	DFI	0.00031021	0.00124699	5.43189	Mutant	7	270	4322
LUAD	MMP2	OS	0.573435	0.574051	0.791538	WT	20	488	4313
LUAD	MMP2	PFS	0.966771	0.964719	1.01374	Mutant	20	488	4313
LUAD	MMP2	DSS	0.820347	0.820096	0.901021	WT	19	420	4313
LUAD	MMP2	DFI	0.22903	0.232634	1.60088	Mutant	14	263	4313
LUAD	MMP3	OS	0.617803	0.619875	1.42411	Mutant	7	501	4314
LUAD	MMP3	PFS	0.680595	0.681849	0.747315	WT	7	501	4314
LUAD	MMP3	DSS	0.335274	0.344618	1.96665	Mutant	7	432	4314
LUAD	MMP3	DFI	0.209014	0.222505	2.39642	Mutant	3	274	4314
LUAD	MMP9	OS	0.0643375	0.992201	1.08604e-07	WT	8	500	4318
LUAD	MMP9	PFS	0.162014	0.178254	0.384422	WT	8	500	4318
LUAD	MMP9	DSS	0.109887	0.993277	1.07979e-07	WT	8	431	4318
LUAD	MMP9	DFI	0.396985	0.410862	0.437134	WT	6	271	4318
LUAD	SERPINE1	OS	0.0557232	0.0891828	0.181828	WT	12	496	5054
LUAD	SERPINE1	PFS	0.007286	0.0273944	0.109643	WT	12	496	5054
LUAD	SERPINE1	DSS	0.128771	0.161356	0.24486	WT	12	427	5054
LUAD	SERPINE1	DFI	0.258489	0.281655	0.338603	WT	8	269	5054
LUAD	SPP1	OS	0.701352	0.703195	1.46655	Mutant	5	503	6696
LUAD	SPP1	PFS	0.746797	0.74763	0.724244	WT	5	503	6696
LUAD	SPP1	DSS	0.500634	0.995563	3.0266e-07	WT	4	435	6696
LUAD	SPP1	DFI	0.399887	0.994469	3.00764e-07	WT	3	274	6696
LUAD	TNFRSF11B	OS	0.228117	0.252284	3.1673	Mutant	3	505	4982
LUAD	TNFRSF11B	PFS	0.612453	0.616643	1.6528	Mutant	3	505	4982
LUAD	TNFRSF11B	DSS	0.0801125	0.113259	4.96575	Mutant	3	436	4982
LUSC	ICAM1	OS	0.362693	0.378149	0.413138	WT	4	475	3383
LUSC	ICAM1	PFS	0.240542	0.264972	0.327011	WT	4	476	3383
LUSC	ICAM1	DSS	0.318145	0.99577	1.09881e-07	WT	3	354	3383
LUSC	ICAM3	OS	0.408221	0.420799	0.445985	WT	4	475	3385
LUSC	ICAM3	PFS	0.643826	0.645084	0.720804	WT	4	476	3385
LUSC	ICAM3	DSS	0.279956	0.995428	1.09541e-07	WT	3	354	3385
LUSC	ITGA2	OS	0.172818	0.176568	1.63021	Mutant	13	466	3673
LUSC	ITGA2	PFS	0.282454	0.285385	1.46961	Mutant	13	467	3673
LUSC	ITGA2	DSS	0.277907	0.284346	1.87923	Mutant	8	349	3673
LUSC	ITGA2	DFI	0.685841	0.687176	1.33658	Mutant	6	236	3673
LUSC	LCP1	OS	0.999537	0.999616	1.0002	Mutant	12	467	3936
LUSC	LCP1	PFS	0.687787	0.687978	0.845657	WT	12	468	3936
LUSC	LCP1	DSS	0.734926	0.733931	1.22144	Mutant	9	348	3936
LUSC	LCP1	DFI	0.550362	0.553587	1.53313	Mutant	6	236	3936
LUSC	MMP1	OS	0.226906	0.252433	0.317014	WT	4	475	4312
LUSC	MMP1	PFS	0.860001	0.859787	0.902242	WT	4	476	4312
LUSC	MMP1	DSS	0.297419	0.995606	1.08566e-07	WT	3	354	4312
LUSC	MMP10	OS	0.69458	0.696324	0.676001	WT	3	476	4319
LUSC	MMP10	PFS	0.732268	0.734122	0.711403	WT	3	477	4319
LUSC	MMP14	OS	0.464242	0.468056	0.654657	WT	6	473	4323
LUSC	MMP14	PFS	0.771853	0.771287	1.15873	Mutant	6	474	4323
LUSC	MMP14	DSS	0.916337	0.916145	0.92702	WT	5	352	4323
LUSC	MMP14	DFI	0.899384	0.899575	1.13637	Mutant	3	239	4323
LUSC	MMP2	OS	0.47346	0.482489	0.494234	WT	8	471	4313
LUSC	MMP2	PFS	0.304411	0.323953	0.37192	WT	8	472	4313
LUSC	MMP2	DSS	0.938729	0.938585	0.925284	WT	8	349	4313
LUSC	MMP2	DFI	0.598917	0.60334	1.69431	Mutant	6	236	4313
LUSC	MMP9	OS	0.366731	0.369739	0.688139	WT	14	465	4318
LUSC	MMP9	PFS	0.1248	0.130721	0.531575	WT	14	466	4318
LUSC	MMP9	DSS	0.366684	0.382775	0.415227	WT	8	349	4318
LUSC	MMP9	DFI	0.25882	0.995252	1.07879e-07	WT	3	239	4318
LUSC	SERPINE1	OS	0.632765	0.63472	1.40229	Mutant	5	474	5054
LUSC	SERPINE1	PFS	0.919292	0.918947	1.07501	Mutant	5	475	5054
LUSC	SERPINE1	DSS	0.69988	0.702042	1.47018	Mutant	4	353	5054
LUSC	SERPINE1	DFI	0.437283	0.996703	1.10266e-07	WT	3	239	5054
LUSC	SPP1	OS	0.857596	0.857549	0.880098	WT	4	475	6696
LUSC	SPP1	PFS	0.604102	0.605974	0.692958	WT	4	476	6696
LUSC	SPP1	DSS	0.641481	0.644714	1.591	Mutant	3	354	6696
LUSC	TIMP2	OS	0.468722	0.472289	1.52014	Mutant	5	474	7077
LUSC	TIMP2	PFS	0.568045	0.568717	1.39327	Mutant	5	475	7077
LUSC	TIMP2	DSS	0.73205	0.733669	1.40869	Mutant	3	354	7077
LUSC	TNF	OS	0.654801	0.655186	1.29696	Mutant	5	474	7124
LUSC	TNF	PFS	0.247401	0.252576	1.67829	Mutant	5	475	7124
LUSC	TNF	DSS	0.578063	0.583165	1.7394	Mutant	3	354	7124
LUSC	TNFRSF11B	OS	0.110985	0.144321	0.230909	WT	7	472	4982
LUSC	TNFRSF11B	PFS	0.183356	0.198789	0.400591	WT	7	473	4982
LUSC	TNFRSF11B	DSS	0.390745	0.404452	0.430667	WT	7	350	4982
LUSC	TNFRSF11B	DFI	0.570702	0.576016	1.75928	Mutant	3	239	4982
OV	ITGA2	OS	0.918075	0.91724	0.941324	WT	6	402	3673
OV	ITGA2	PFS	0.429952	0.434835	0.635267	WT	6	402	3673
OV	ITGA2	DSS	0.977714	0.976739	0.983155	WT	6	370	3673
OV	ITGA2	DFI	0.171809	0.994241	1.08555e-07	WT	3	197	3673
OV	MMP13	OS	0.699121	0.700606	1.25067	Mutant	4	404	4322
OV	MMP13	PFS	0.53257	0.534141	0.69691	WT	4	404	4322
OV	MMP13	DSS	0.657117	0.658941	1.29309	Mutant	4	372	4322
OV	MMP9	OS	0.718781	0.719872	1.17648	Mutant	5	403	4318
OV	MMP9	PFS	0.104046	0.111232	2.05537	Mutant	5	403	4318
OV	MMP9	DSS	0.988377	0.987214	0.99192	WT	4	372	4318
OV	SERPINE1	OS	0.168076	0.177703	2.19395	Mutant	3	405	5054
OV	SERPINE1	PFS	0.0995046	0.111186	2.53451	Mutant	3	405	5054
OV	TNFRSF11B	OS	0.833959	0.833653	0.861205	WT	4	404	4982
OV	TNFRSF11B	PFS	0.735106	0.734849	0.820761	WT	4	404	4982
OV	TNFRSF11B	DSS	0.448171	0.458801	2.1089	Mutant	3	373	4982
PAAD	LCP1	OS	0.385789	0.391443	1.65822	Mutant	3	175	3936
PAAD	LCP1	PFS	0.825027	0.82662	1.1373	Mutant	3	175	3936
PRAD	ITGA2	OS	0.00020356	0.00824372	19.2466	Mutant	5	493	3673
PRAD	ITGA2	PFS	0.139669	0.157056	2.76166	Mutant	5	493	3673
PRAD	ITGA2	DSS	0.888972	0.999082	3.01207e-07	WT	4	489	3673
PRAD	ITGA2	DFI	0.631335	0.996844	3.01411e-07	WT	3	332	3673
PRAD	MMP9	OS	0.750981	0.998657	1.0947e-07	WT	4	494	4318
PRAD	MMP9	PFS	0.975251	0.97531	1.03163	Mutant	4	494	4318
PRAD	MMP9	DSS	0.843508	0.998702	3.00973e-07	WT	4	489	4318
PRAD	MMP9	DFI	0.673997	0.997234	3.01364e-07	WT	3	332	4318
READ	ITGA2	OS	0.52099	0.997295	1.08483e-07	WT	3	145	3673
READ	ITGA2	PFS	0.330953	0.997365	3.97386e-08	WT	3	145	3673
READ	ITGA2	DSS	0.60815	0.997844	1.07924e-07	WT	3	133	3673
READ	ITGA2	DFI	0.554445	0.999002	1.36407e-08	WT	3	38	3673
READ	MMP2	OS	0.894041	0.894123	1.14695	Mutant	5	143	4313
READ	MMP2	PFS	0.539567	0.545821	0.54133	WT	5	143	4313
READ	MMP2	DSS	0.518184	0.525919	1.95527	Mutant	5	131	4313
READ	MMP9	OS	0.251961	0.996978	3.7401e-08	WT	4	144	4318
READ	MMP9	PFS	0.156045	0.996245	3.77071e-08	WT	4	144	4318
READ	MMP9	DSS	0.41835	0.997855	3.77436e-08	WT	4	132	4318
READ	MMP9	DFI	0.554445	0.999002	1.36407e-08	WT	3	38	4318
SARC	TNF	OS	0.705268	0.70839	0.686291	WT	3	236	7124
SARC	TNF	PFS	0.40456	0.417316	0.442677	WT	3	236	7124
SARC	TNF	DSS	0.817422	0.819611	0.794648	WT	3	220	7124
SKCM	FGF2	OS	0.530569	0.532134	1.32746	Mutant	6	453	2247
SKCM	FGF2	PFS	0.565921	0.566053	1.33714	Mutant	4	450	2247
SKCM	FGF2	DSS	0.940269	0.940385	1.05481	Mutant	3	424	2247
SKCM	ICAM1	OS	0.608864	0.609564	1.18034	Mutant	15	444	3383
SKCM	ICAM1	PFS	0.263458	0.266079	0.685524	WT	14	440	3383
SKCM	ICAM1	DSS	0.870047	0.870317	1.06097	Mutant	14	413	3383
SKCM	ICAM3	OS	0.133035	0.14048	1.95207	Mutant	7	452	3385
SKCM	ICAM3	PFS	0.954355	0.954303	0.974466	WT	7	447	3385
SKCM	ICAM3	DSS	0.0866259	0.0944811	2.13986	Mutant	7	420	3385
SKCM	ITGA2	OS	0.398199	0.399288	0.820367	WT	39	420	3673
SKCM	ITGA2	PFS	0.161677	0.16273	0.761596	WT	39	415	3673
SKCM	ITGA2	DSS	0.425807	0.426823	0.820821	WT	37	390	3673
SKCM	LCP1	OS	0.749657	0.750107	1.10892	Mutant	13	446	3936
SKCM	LCP1	PFS	0.560081	0.560245	1.18751	Mutant	13	441	3936
SKCM	LCP1	DSS	0.660096	0.660794	1.18466	Mutant	10	417	3936
SKCM	MMP1	OS	0.528609	0.529221	0.829415	WT	26	433	4312
SKCM	MMP1	PFS	0.392744	0.393532	0.791728	WT	24	430	4312
SKCM	MMP1	DSS	0.372909	0.37481	0.725373	WT	23	404	4312
SKCM	MMP10	OS	0.0645479	0.0671041	1.59149	Mutant	25	434	4319
SKCM	MMP10	PFS	0.532086	0.533149	1.15916	Mutant	24	430	4319
SKCM	MMP10	DSS	0.0444449	0.0469987	1.68597	Mutant	24	403	4319
SKCM	MMP13	OS	0.973558	0.973966	1.00878	Mutant	30	429	4322
SKCM	MMP13	PFS	0.292049	0.293863	1.26836	Mutant	29	425	4322
SKCM	MMP13	DSS	0.502403	0.503045	0.804171	WT	26	401	4322
SKCM	MMP14	OS	0.00536203	0.00671735	2.24177	Mutant	13	446	4323
SKCM	MMP14	PFS	0.169384	0.172769	1.47247	Mutant	13	441	4323
SKCM	MMP14	DSS	0.00158282	0.00242224	2.69302	Mutant	12	415	4323
SKCM	MMP2	OS	0.51191	0.512445	1.25049	Mutant	20	439	4313
SKCM	MMP2	PFS	0.852984	0.852852	0.944596	WT	19	435	4313
SKCM	MMP2	DSS	0.265059	0.268285	1.5353	Mutant	18	409	4313
SKCM	MMP3	OS	0.647186	0.647208	0.862052	WT	23	436	4314
SKCM	MMP3	PFS	0.720888	0.720109	0.912061	WT	23	431	4314
SKCM	MMP3	DSS	0.620006	0.620223	0.835694	WT	21	406	4314
SKCM	MMP9	OS	0.203651	0.207063	1.50676	Mutant	14	445	4318
SKCM	MMP9	PFS	0.156798	0.159652	1.49042	Mutant	14	440	4318
SKCM	MMP9	DSS	0.222438	0.227556	1.65368	Mutant	11	416	4318
SKCM	SERPINE1	OS	0.213517	0.223345	2.03478	Mutant	6	453	5054
SKCM	SERPINE1	PFS	0.307909	0.313768	1.66213	Mutant	6	448	5054
SKCM	SERPINE1	DSS	0.154835	0.166328	2.24547	Mutant	6	421	5054
SKCM	SPP1	OS	0.84279	0.843117	1.09376	Mutant	9	450	6696
SKCM	SPP1	PFS	0.343983	0.34571	1.4024	Mutant	9	445	6696
SKCM	SPP1	DSS	0.852167	0.852075	0.89707	WT	7	420	6696
SKCM	TIMP2	OS	0.173285	0.991047	3.01193e-07	WT	4	455	7077
SKCM	TIMP2	PFS	0.172179	0.201801	0.278395	WT	4	450	7077
SKCM	TIMP2	DSS	0.194637	0.991477	3.00863e-07	WT	4	423	7077
SKCM	TNFRSF11B	OS	0.903248	0.903282	1.04017	Mutant	21	438	4982
SKCM	TNFRSF11B	PFS	0.975736	0.975274	0.991814	WT	21	433	4982
SKCM	TNFRSF11B	DSS	0.789135	0.789331	0.902082	WT	18	409	4982
STAD	FGF2	OS	0.977558	0.977155	0.979813	WT	4	428	2247
STAD	FGF2	PFS	0.660535	0.661542	0.732407	WT	4	431	2247
STAD	FGF2	DSS	0.637716	0.639629	1.39802	Mutant	4	360	2247
STAD	ICAM1	OS	0.754394	0.755438	1.24819	Mutant	4	428	3383
STAD	ICAM1	PFS	0.400149	0.405463	1.62277	Mutant	4	431	3383
STAD	ICAM3	OS	0.818541	0.819295	1.17661	Mutant	4	428	3385
STAD	ICAM3	PFS	0.936248	0.935735	0.944282	WT	4	431	3385
STAD	ICAM3	DSS	0.889362	0.889704	1.14968	Mutant	3	361	3385
STAD	ITGA2	OS	0.41541	0.419782	0.664391	WT	9	423	3673
STAD	ITGA2	PFS	0.204477	0.211862	0.532024	WT	9	426	3673
STAD	ITGA2	DSS	0.471333	0.477312	0.601544	WT	7	357	3673
STAD	ITGA2	DFI	0.801821	0.802217	0.775856	WT	5	218	3673
STAD	LCP1	OS	0.0599008	0.0936146	0.185929	WT	8	424	3936
STAD	LCP1	PFS	0.0626095	0.0805648	0.288652	WT	8	427	3936
STAD	LCP1	DSS	0.0755795	0.995213	3.92075e-08	WT	7	357	3936
STAD	LCP1	DFI	0.578252	0.583038	0.573623	WT	6	217	3936
STAD	MMP1	OS	0.0590972	0.0707212	2.86968	Mutant	3	429	4312
STAD	MMP1	PFS	0.161953	0.171868	2.21536	Mutant	3	432	4312
STAD	MMP10	OS	0.597539	0.598887	0.766012	WT	10	422	4319
STAD	MMP10	PFS	0.652668	0.653294	0.815795	WT	10	425	4319
STAD	MMP10	DSS	0.583674	0.585868	0.677308	WT	8	356	4319
STAD	MMP10	DFI	0.392255	0.996383	1.09314e-07	WT	3	220	4319
STAD	MMP13	OS	0.169522	0.180765	2.19014	Mutant	4	428	4322
STAD	MMP13	PFS	0.383571	0.389078	1.65318	Mutant	4	431	4322
STAD	MMP13	DSS	0.168945	0.185301	2.59816	Mutant	3	361	4322
STAD	MMP14	OS	0.823779	0.825153	0.854471	WT	7	425	4323
STAD	MMP14	PFS	0.497659	0.502673	0.620988	WT	7	428	4323
STAD	MMP14	DSS	0.630381	0.631128	1.40994	Mutant	7	357	4323
STAD	MMP14	DFI	0.894683	0.895024	1.14298	Mutant	6	217	4323
STAD	MMP2	OS	0.218254	0.232288	0.42713	WT	8	424	4313
STAD	MMP2	PFS	0.233429	0.242347	0.506102	WT	8	427	4313
STAD	MMP2	DSS	0.321287	0.340043	0.383029	WT	7	357	4313
STAD	MMP2	DFI	0.751382	0.752189	1.2578	Mutant	7	216	4313
STAD	MMP3	OS	0.0327142	0.048896	0.24554	WT	13	419	4314
STAD	MMP3	PFS	0.0103438	0.0214897	0.194707	WT	13	422	4314
STAD	MMP3	DSS	0.14676	0.164006	0.36897	WT	13	351	4314
STAD	MMP3	DFI	0.473611	0.482772	0.491462	WT	7	216	4314
STAD	MMP9	OS	0.210287	0.217855	0.535588	WT	16	416	4318
STAD	MMP9	PFS	0.181478	0.18795	0.550527	WT	16	419	4318
STAD	MMP9	DSS	0.454274	0.45769	0.646547	WT	15	349	4318
STAD	MMP9	DFI	0.891254	0.891576	1.10374	Mutant	10	213	4318
STAD	SERPINE1	OS	0.354976	0.370939	0.407541	WT	6	426	5054
STAD	SERPINE1	PFS	0.199873	0.227475	0.298184	WT	6	429	5054
STAD	SERPINE1	DSS	0.28031	0.995419	1.10206e-07	WT	5	359	5054
STAD	SERPINE1	DFI	0.41309	0.996536	1.09604e-07	WT	4	219	5054
STAD	SPP1	OS	0.410183	0.413027	1.51381	Mutant	6	426	6696
STAD	SPP1	PFS	0.822582	0.822686	1.11986	Mutant	6	429	6696
STAD	SPP1	DSS	0.301853	0.312523	2.06011	Mutant	4	360	6696
STAD	SPP1	DFI	0.52121	0.525146	1.9035	Mutant	3	220	6696
STAD	TNFRSF11B	OS	0.397417	0.400849	1.53046	Mutant	6	426	4982
STAD	TNFRSF11B	PFS	0.719872	0.720146	1.19845	Mutant	6	429	4982
STAD	TNFRSF11B	DSS	0.400769	0.407914	1.80702	Mutant	4	360	4982
UCEC	FGF2	OS	0.838386	0.838723	1.22732	Mutant	5	525	2247
UCEC	FGF2	PFS	0.714755	0.716152	0.694193	WT	5	525	2247
UCEC	FGF2	DSS	0.585045	0.589707	1.72342	Mutant	5	496	2247
UCEC	FGF2	DFI	0.421594	0.996587	1.10404e-07	WT	4	387	2247
UCEC	ICAM1	OS	0.13018	0.993647	1.07509e-07	WT	11	519	3383
UCEC	ICAM1	PFS	0.13495	0.167139	0.249909	WT	11	519	3383
UCEC	ICAM1	DSS	0.196379	0.994583	1.07254e-07	WT	11	490	3383
UCEC	ICAM1	DFI	0.570643	0.575709	0.568374	WT	10	381	3383
UCEC	ICAM3	OS	0.242253	0.255228	0.442679	WT	20	510	3385
UCEC	ICAM3	PFS	0.102818	0.115162	0.398401	WT	20	510	3385
UCEC	ICAM3	DSS	0.289215	0.310136	0.359127	WT	19	482	3385
UCEC	ICAM3	DFI	0.262322	0.285338	0.340092	WT	17	374	3385
UCEC	ITGA2	OS	0.207176	0.213305	0.56198	WT	38	492	3673
UCEC	ITGA2	PFS	0.0242958	0.0294121	0.401673	WT	38	492	3673
UCEC	ITGA2	DSS	0.0661719	0.100387	0.190437	WT	34	467	3673
UCEC	ITGA2	DFI	0.167892	0.184229	0.384033	WT	30	361	3673
UCEC	LCP1	OS	0.0569782	0.994951	3.77348e-08	WT	17	513	3936
UCEC	LCP1	PFS	0.117987	0.135576	0.344224	WT	17	513	3936
UCEC	LCP1	DSS	0.131958	0.995971	3.85155e-08	WT	17	484	3936
UCEC	LCP1	DFI	0.893492	0.893476	0.907985	WT	16	375	3936
UCEC	MMP1	OS	0.161503	0.994103	1.08351e-07	WT	13	517	4312
UCEC	MMP1	PFS	0.0596449	0.992077	1.0807e-07	WT	13	517	4312
UCEC	MMP1	DSS	0.232389	0.994975	1.08108e-07	WT	13	488	4312
UCEC	MMP1	DFI	0.216005	0.994804	1.07646e-07	WT	12	379	4312
UCEC	MMP10	OS	0.158282	0.174789	0.378239	WT	21	509	4319
UCEC	MMP10	PFS	0.0704899	0.0829272	0.362935	WT	21	509	4319
UCEC	MMP10	DSS	0.211717	0.238693	0.304436	WT	20	481	4319
UCEC	MMP10	DFI	0.0578379	0.995009	3.71376e-08	WT	18	373	4319
UCEC	MMP13	OS	0.101032	0.119213	0.327573	WT	26	504	4322
UCEC	MMP13	PFS	0.0250322	0.0351891	0.292146	WT	26	504	4322
UCEC	MMP13	DSS	0.318635	0.328535	0.494788	WT	26	475	4322
UCEC	MMP13	DFI	0.468874	0.473751	0.596816	WT	20	371	4322
UCEC	MMP14	OS	0.203133	0.217767	0.413229	WT	23	507	4323
UCEC	MMP14	PFS	0.150838	0.159468	0.489061	WT	23	507	4323
UCEC	MMP14	DSS	0.52615	0.529613	0.635763	WT	23	478	4323
UCEC	MMP14	DFI	0.964975	0.964889	0.974194	WT	20	371	4323
UCEC	MMP2	OS	0.0422035	0.0745276	0.165827	WT	22	508	4313
UCEC	MMP2	PFS	0.00455125	0.0216542	0.0995343	WT	22	508	4313
UCEC	MMP2	DSS	0.0565476	0.99498	3.71733e-08	WT	21	480	4313
UCEC	MMP2	DFI	0.0575311	0.995001	3.71645e-08	WT	19	372	4313
UCEC	MMP3	OS	0.0478227	0.0651294	0.265306	WT	25	505	4314
UCEC	MMP3	PFS	0.0112364	0.0187396	0.251648	WT	25	505	4314
UCEC	MMP3	DSS	0.0878557	0.122008	0.209323	WT	24	477	4314
UCEC	MMP3	DFI	0.129124	0.161943	0.243558	WT	20	371	4314
UCEC	MMP9	OS	0.489524	0.491262	0.727536	WT	30	500	4318
UCEC	MMP9	PFS	0.323847	0.326171	0.698902	WT	30	500	4318
UCEC	MMP9	DSS	0.288675	0.299799	0.473968	WT	27	474	4318
UCEC	MMP9	DFI	0.331628	0.341043	0.503513	WT	21	370	4318
UCEC	SERPINE1	OS	0.124678	0.157471	0.240597	WT	16	514	5054
UCEC	SERPINE1	PFS	0.0676177	0.0857479	0.293269	WT	16	514	5054
UCEC	SERPINE1	DSS	0.321955	0.340423	0.381842	WT	16	485	5054
UCEC	SERPINE1	DFI	0.123785	0.995879	3.86585e-08	WT	12	379	5054
UCEC	SPP1	OS	0.188512	0.217116	0.288513	WT	14	516	6696
UCEC	SPP1	PFS	0.27681	0.284515	0.534814	WT	14	516	6696
UCEC	SPP1	DSS	0.155095	0.996174	3.90961e-08	WT	13	488	6696
UCEC	SPP1	DFI	0.974061	0.973995	0.976776	WT	12	379	6696
UCEC	TIMP2	OS	0.633869	0.635447	0.711447	WT	12	518	7077
UCEC	TIMP2	PFS	0.835802	0.835568	0.899697	WT	12	518	7077
UCEC	TIMP2	DSS	0.659617	0.662154	0.643366	WT	11	490	7077
UCEC	TIMP2	DFI	0.599973	0.604085	0.592459	WT	10	381	7077
UCEC	TNF	OS	0.630892	0.634118	0.618714	WT	7	523	7124
UCEC	TNF	PFS	0.329243	0.347021	0.388532	WT	7	523	7124
UCEC	TNF	DSS	0.992686	0.992634	0.990714	WT	7	494	7124
UCEC	TNF	DFI	0.351916	0.996059	1.09595e-07	WT	5	386	7124
UCEC	TNFRSF11B	OS	0.102379	0.120538	0.328733	WT	26	504	4982
UCEC	TNFRSF11B	PFS	0.00917113	0.0198198	0.189917	WT	26	504	4982
UCEC	TNFRSF11B	DSS	0.136504	0.168863	0.249352	WT	25	476	4982
UCEC	TNFRSF11B	DFI	0.047908	0.994807	3.69548e-08	WT	21	370	4982
