# Supplementary material for: Pan-cancer analyses of senescence-related genes in extracellular matrix characterization in cancer
Source: Discov Oncol. 2023 Nov 20;14:208. doi: 10.1007/s12672-023-00828-7 (PMC10660488; doi:10.1007/s12672-023-00828-7)
Supplement: Supplementary file 26 — Supplementary file26 (XLSX 268 KB) [file 12672_2023_828_MOESM26_ESM.xlsx]

## Sheet: SheetName
Table S21 The differences of pathway activity between high and low mRNA expression in pan-cancer
cancertype	symbol	pathway	fdr	class	diff	entrez
ACC	FGF2	Apoptosis	0.720918	None	-0.582105118	2247
ACC	FGF2	CellCycle	0.720918	None	-0.409331052	2247
ACC	FGF2	DNADamage	0.720918	None	-0.363559173	2247
ACC	FGF2	EMT	0.864139	None	0.163256933	2247
ACC	FGF2	Hormone AR	0.720918	None	-0.437376937	2247
ACC	FGF2	Hormone ER	0.864139	None	-0.048094535	2247
ACC	FGF2	PI3KAKT	0.864139	None	-0.129360798	2247
ACC	FGF2	RASMAPK	0.720918	None	0.585216121	2247
ACC	FGF2	RTK	0.720918	None	0.287026414	2247
ACC	FGF2	TSCmTOR	0.720918	None	0.437545993	2247
ACC	ICAM1	Apoptosis	0.979007	None	0.079056794	3383
ACC	ICAM1	CellCycle	0.325426	None	0.749088791	3383
ACC	ICAM1	DNADamage	0.346556	None	0.710510943	3383
ACC	ICAM1	EMT	0.979007	None	0.01243512	3383
ACC	ICAM1	Hormone AR	0.269665	None	0.849046345	3383
ACC	ICAM1	Hormone ER	0.384208	None	0.311365446	3383
ACC	ICAM1	PI3KAKT	0.384208	None	-0.756145794	3383
ACC	ICAM1	RASMAPK	0.979007	None	-0.040668901	3383
ACC	ICAM1	RTK	0.269665	None	0.798234216	3383
ACC	ICAM1	TSCmTOR	0.321476	None	-0.570939593	3383
ACC	ICAM3	Apoptosis	0.860294	None	-0.31394996	3385
ACC	ICAM3	CellCycle	0.966873	None	-0.137867884	3385
ACC	ICAM3	DNADamage	0.714485	None	-0.515046984	3385
ACC	ICAM3	EMT	0.99712	None	0.063723402	3385
ACC	ICAM3	Hormone AR	0.860294	None	-0.224014462	3385
ACC	ICAM3	Hormone ER	0.99712	None	-0.001015296	3385
ACC	ICAM3	PI3KAKT	0.714485	None	0.757386512	3385
ACC	ICAM3	RASMAPK	0.714485	None	0.428484393	3385
ACC	ICAM3	RTK	0.860294	None	0.292952128	3385
ACC	ICAM3	TSCmTOR	0.714485	None	0.502659528	3385
ACC	ITGA2	Apoptosis	0.79316	None	0.395180178	3673
ACC	ITGA2	CellCycle	0.378183	None	-0.770518043	3673
ACC	ITGA2	DNADamage	0.615978	None	-0.611678132	3673
ACC	ITGA2	EMT	0.300627	None	0.888078624	3673
ACC	ITGA2	Hormone AR	0.79316	None	-0.212468319	3673
ACC	ITGA2	Hormone ER	0.300627	None	-0.577195208	3673
ACC	ITGA2	PI3KAKT	0.79316	None	-0.319440909	3673
ACC	ITGA2	RASMAPK	0.79316	None	0.127304028	3673
ACC	ITGA2	RTK	0.79316	None	-0.164048516	3673
ACC	ITGA2	TSCmTOR	0.79316	None	-0.091692071	3673
ACC	LCP1	Apoptosis	0.0388605	Inhibition	-1.142912258	3936
ACC	LCP1	CellCycle	0.00499594	Inhibition	-1.464000028	3936
ACC	LCP1	DNADamage	0.614086	None	-0.335604504	3936
ACC	LCP1	EMT	0.641066	None	-0.291194905	3936
ACC	LCP1	Hormone AR	0.609024	None	-0.391967859	3936
ACC	LCP1	Hormone ER	0.0341033	Activation	0.70202038	3936
ACC	LCP1	PI3KAKT	0.614086	None	-0.523807039	3936
ACC	LCP1	RASMAPK	0.00499594	Activation	1.251068169	3936
ACC	LCP1	RTK	0.527748	None	0.467245616	3936
ACC	LCP1	TSCmTOR	0.692031	None	0.141166141	3936
ACC	MMP1	Apoptosis	0.459597	None	0.505568447	4312
ACC	MMP1	CellCycle	0.445576	None	0.667202306	4312
ACC	MMP1	DNADamage	0.895459	None	0.067461885	4312
ACC	MMP1	EMT	0.662372	None	0.296936873	4312
ACC	MMP1	Hormone AR	0.445576	None	-0.622981213	4312
ACC	MMP1	Hormone ER	0.459597	None	-0.319400659	4312
ACC	MMP1	PI3KAKT	0.383365	None	1.193331416	4312
ACC	MMP1	RASMAPK	0.566096	None	0.310325433	4312
ACC	MMP1	RTK	0.682184	None	0.23250036	4312
ACC	MMP1	TSCmTOR	0.383365	None	0.672211556	4312
ACC	MMP14	Apoptosis	0.0453217	Activation	1.303563571	4323
ACC	MMP14	CellCycle	0.180595	None	0.855808458	4323
ACC	MMP14	DNADamage	0.30789	None	0.637093523	4323
ACC	MMP14	EMT	0.136066	None	0.945417295	4323
ACC	MMP14	Hormone AR	0.244374	None	0.616960632	4323
ACC	MMP14	Hormone ER	0.136066	None	-0.584144783	4323
ACC	MMP14	PI3KAKT	0.809569	None	0.199516589	4323
ACC	MMP14	RASMAPK	0.758813	None	-0.187833013	4323
ACC	MMP14	RTK	0.18168	None	0.699866624	4323
ACC	MMP14	TSCmTOR	0.809569	None	0.084924591	4323
ACC	MMP2	Apoptosis	0.963752	None	0.339419555	4313
ACC	MMP2	CellCycle	0.963752	None	-0.110768313	4313
ACC	MMP2	DNADamage	0.509623	None	0.790987297	4313
ACC	MMP2	EMT	0.963752	None	0.203606859	4313
ACC	MMP2	Hormone AR	0.509623	None	0.810867613	4313
ACC	MMP2	Hormone ER	0.509623	None	0.353038796	4313
ACC	MMP2	PI3KAKT	0.509623	None	-0.924575373	4313
ACC	MMP2	RASMAPK	0.963752	None	0.017458052	4313
ACC	MMP2	RTK	0.963752	None	-0.127909189	4313
ACC	MMP2	TSCmTOR	0.963752	None	-0.046668025	4313
ACC	MMP9	Apoptosis	0.0659038	None	1.152251559	4318
ACC	MMP9	CellCycle	0.5007	None	0.626859737	4318
ACC	MMP9	DNADamage	0.960658	None	0.137609417	4318
ACC	MMP9	EMT	0.0154739	Activation	1.442908426	4318
ACC	MMP9	Hormone AR	0.915046	None	-0.324321686	4318
ACC	MMP9	Hormone ER	0.464537	None	-0.40483252	4318
ACC	MMP9	PI3KAKT	0.960658	None	-0.034130672	4318
ACC	MMP9	RASMAPK	0.960658	None	0.092903595	4318
ACC	MMP9	RTK	0.960658	None	-0.056281443	4318
ACC	MMP9	TSCmTOR	0.960658	None	-0.155314502	4318
ACC	PECAM1	Apoptosis	0.795251	None	0.208653686	5175
ACC	PECAM1	CellCycle	0.795251	None	-0.176122285	5175
ACC	PECAM1	DNADamage	0.356958	None	1.103105417	5175
ACC	PECAM1	EMT	0.906737	None	-0.059453014	5175
ACC	PECAM1	Hormone AR	0.594795	None	0.551572636	5175
ACC	PECAM1	Hormone ER	0.594795	None	0.431052245	5175
ACC	PECAM1	PI3KAKT	0.644753	None	-0.605743961	5175
ACC	PECAM1	RASMAPK	0.594795	None	0.442974113	5175
ACC	PECAM1	RTK	0.644753	None	0.388693193	5175
ACC	PECAM1	TSCmTOR	0.795251	None	0.143384464	5175
ACC	SERPINE1	Apoptosis	0.372457	None	0.788860623	5054
ACC	SERPINE1	CellCycle	0.414563	None	0.556692631	5054
ACC	SERPINE1	DNADamage	0.372457	None	0.78718305	5054
ACC	SERPINE1	EMT	0.414563	None	0.499584138	5054
ACC	SERPINE1	Hormone AR	0.523628	None	-0.310146908	5054
ACC	SERPINE1	Hormone ER	0.372457	None	-0.392749706	5054
ACC	SERPINE1	PI3KAKT	0.95127	None	-0.04199632	5054
ACC	SERPINE1	RASMAPK	0.437607	None	0.342040819	5054
ACC	SERPINE1	RTK	0.372457	None	0.669440598	5054
ACC	SERPINE1	TSCmTOR	0.414563	None	0.396454507	5054
ACC	SPP1	Apoptosis	0.0853882	None	1.17043054	6696
ACC	SPP1	CellCycle	0.962927	None	0.024426454	6696
ACC	SPP1	DNADamage	0.833143	None	0.262100544	6696
ACC	SPP1	EMT	0.189602	None	0.899877423	6696
ACC	SPP1	Hormone AR	0.0853882	None	-1.075186683	6696
ACC	SPP1	Hormone ER	0.833143	None	-0.140066963	6696
ACC	SPP1	PI3KAKT	0.833143	None	-0.476121698	6696
ACC	SPP1	RASMAPK	0.456729	None	0.488962334	6696
ACC	SPP1	RTK	0.833143	None	-0.195298494	6696
ACC	SPP1	TSCmTOR	0.953805	None	0.060235834	6696
ACC	TIMP2	Apoptosis	0.830162	None	0.253825506	7077
ACC	TIMP2	CellCycle	0.927673	None	0.050923957	7077
ACC	TIMP2	DNADamage	0.830162	None	-0.230569055	7077
ACC	TIMP2	EMT	0.495553	None	0.696406181	7077
ACC	TIMP2	Hormone AR	0.927673	None	-0.039770346	7077
ACC	TIMP2	Hormone ER	0.830162	None	-0.224293664	7077
ACC	TIMP2	PI3KAKT	0.495553	None	0.954899558	7077
ACC	TIMP2	RASMAPK	0.495553	None	0.476436531	7077
ACC	TIMP2	RTK	0.278438	None	0.907842613	7077
ACC	TIMP2	TSCmTOR	0.830162	None	0.191825478	7077
ACC	TNF	Apoptosis	0.884371	None	-0.219201332	7124
ACC	TNF	CellCycle	0.884371	None	-0.135655091	7124
ACC	TNF	DNADamage	0.837595	None	0.575947255	7124
ACC	TNF	EMT	0.884371	None	-0.070123424	7124
ACC	TNF	Hormone AR	0.837595	None	-0.419936944	7124
ACC	TNF	Hormone ER	0.884371	None	0.091645312	7124
ACC	TNF	PI3KAKT	0.884371	None	0.270131515	7124
ACC	TNF	RASMAPK	0.837595	None	0.402474671	7124
ACC	TNF	RTK	0.837595	None	0.512296289	7124
ACC	TNF	TSCmTOR	0.884371	None	0.090246396	7124
ACC	TNFRSF11B	Apoptosis	0.70956	None	-0.4253278	4982
ACC	TNFRSF11B	CellCycle	0.70956	None	-0.308994889	4982
ACC	TNFRSF11B	DNADamage	0.70956	None	-0.28744566	4982
ACC	TNFRSF11B	EMT	0.70956	None	-0.472790482	4982
ACC	TNFRSF11B	Hormone AR	0.70956	None	0.293080108	4982
ACC	TNFRSF11B	Hormone ER	0.70956	None	0.229432811	4982
ACC	TNFRSF11B	PI3KAKT	0.795198	None	-0.1828024	4982
ACC	TNFRSF11B	RASMAPK	0.70956	None	0.293487455	4982
ACC	TNFRSF11B	RTK	0.70956	None	0.694001972	4982
ACC	TNFRSF11B	TSCmTOR	0.795198	None	0.107197548	4982
BLCA	FGF2	Apoptosis	0.105579	None	0.299858458	2247
BLCA	FGF2	CellCycle	0.0336457	Inhibition	-0.389265428	2247
BLCA	FGF2	DNADamage	0.00735501	Inhibition	-0.443305479	2247
BLCA	FGF2	EMT	7.77163e-15	Activation	2.579093979	2247
BLCA	FGF2	Hormone AR	0.00735501	Inhibition	-0.532295623	2247
BLCA	FGF2	Hormone ER	7.6571e-05	Activation	0.294854892	2247
BLCA	FGF2	PI3KAKT	0.776571	None	-0.069087103	2247
BLCA	FGF2	RASMAPK	0.69817	None	0.093254712	2247
BLCA	FGF2	RTK	7.6571e-05	Inhibition	-0.957927212	2247
BLCA	FGF2	TSCmTOR	0.177087	None	-0.230286604	2247
BLCA	ICAM1	Apoptosis	4.72471e-10	Activation	1.042565921	3383
BLCA	ICAM1	CellCycle	0.0964266	None	-0.307693823	3383
BLCA	ICAM1	DNADamage	6.62379e-08	Inhibition	-0.825097473	3383
BLCA	ICAM1	EMT	3.68307e-14	Activation	2.523554965	3383
BLCA	ICAM1	Hormone AR	6.52739e-13	Inhibition	-1.308828242	3383
BLCA	ICAM1	Hormone ER	0.0048619	Activation	0.207768036	3383
BLCA	ICAM1	PI3KAKT	0.63062	None	-0.117581544	3383
BLCA	ICAM1	RASMAPK	0.318203	None	0.204491428	3383
BLCA	ICAM1	RTK	0.000435861	Inhibition	-0.835992077	3383
BLCA	ICAM1	TSCmTOR	0.153424	None	-0.242701856	3383
BLCA	ICAM3	Apoptosis	0.00082774	Activation	0.600114051	3385
BLCA	ICAM3	CellCycle	0.0331623	Inhibition	-0.400455774	3385
BLCA	ICAM3	DNADamage	0.885171	None	-0.021881886	3385
BLCA	ICAM3	EMT	0.000281009	Activation	1.370206699	3385
BLCA	ICAM3	Hormone AR	0.62948	None	-0.142513003	3385
BLCA	ICAM3	Hormone ER	0.000281009	Activation	0.281770955	3385
BLCA	ICAM3	PI3KAKT	0.272762	None	-0.338889099	3385
BLCA	ICAM3	RASMAPK	0.692855	None	0.113943391	3385
BLCA	ICAM3	RTK	0.000292492	Inhibition	-0.879527533	3385
BLCA	ICAM3	TSCmTOR	0.740386	None	0.067876297	3385
BLCA	ITGA2	Apoptosis	0.0439755	Activation	0.414182669	3673
BLCA	ITGA2	CellCycle	0.897585	None	0.040866204	3673
BLCA	ITGA2	DNADamage	3.9055e-05	Inhibition	-0.670132647	3673
BLCA	ITGA2	EMT	0.0796697	None	0.715820855	3673
BLCA	ITGA2	Hormone AR	3.19684e-06	Inhibition	-0.925764086	3673
BLCA	ITGA2	Hormone ER	0.96013	None	0.00352346	3673
BLCA	ITGA2	PI3KAKT	0.335539	None	-0.311096267	3673
BLCA	ITGA2	RASMAPK	0.592208	None	0.137878044	3673
BLCA	ITGA2	RTK	0.466998	None	0.222123428	3673
BLCA	ITGA2	TSCmTOR	0.335539	None	-0.201458367	3673
BLCA	LCP1	Apoptosis	2.8998e-05	Activation	0.738392956	3936
BLCA	LCP1	CellCycle	0.720929	None	-0.076174819	3936
BLCA	LCP1	DNADamage	0.00010809	Inhibition	-0.611625238	3936
BLCA	LCP1	EMT	1.03329e-10	Activation	2.208948298	3936
BLCA	LCP1	Hormone AR	3.7914e-10	Inhibition	-1.165726716	3936
BLCA	LCP1	Hormone ER	0.110122	None	0.129362302	3936
BLCA	LCP1	PI3KAKT	0.0819441	None	0.496783539	3936
BLCA	LCP1	RASMAPK	0.205125	None	0.281293066	3936
BLCA	LCP1	RTK	0.213417	None	-0.310187159	3936
BLCA	LCP1	TSCmTOR	0.720929	None	0.056271206	3936
BLCA	MMP1	Apoptosis	0.00117935	Activation	0.588804903	4312
BLCA	MMP1	CellCycle	0.816233	None	-0.039089719	4312
BLCA	MMP1	DNADamage	0.00043114	Inhibition	-0.572787699	4312
BLCA	MMP1	EMT	0.00043114	Activation	1.30342118	4312
BLCA	MMP1	Hormone AR	4.04864e-06	Inhibition	-0.924640149	4312
BLCA	MMP1	Hormone ER	0.816233	None	0.022661713	4312
BLCA	MMP1	PI3KAKT	0.280826	None	-0.334074673	4312
BLCA	MMP1	RASMAPK	0.280826	None	0.265485849	4312
BLCA	MMP1	RTK	0.656143	None	-0.143988374	4312
BLCA	MMP1	TSCmTOR	0.280826	None	-0.202526517	4312
BLCA	MMP10	Apoptosis	0.948443	None	0.012289498	4319
BLCA	MMP10	CellCycle	0.612272	None	-0.159481092	4319
BLCA	MMP10	DNADamage	0.612272	None	-0.170302091	4319
BLCA	MMP10	EMT	0.807465	None	-0.193562873	4319
BLCA	MMP10	Hormone AR	0.0995321	None	-0.474719359	4319
BLCA	MMP10	Hormone ER	0.466904	None	-0.118510031	4319
BLCA	MMP10	PI3KAKT	0.612272	None	-0.241406909	4319
BLCA	MMP10	RASMAPK	0.612272	None	0.173741976	4319
BLCA	MMP10	RTK	0.948443	None	-0.014640158	4319
BLCA	MMP10	TSCmTOR	0.866244	None	-0.062112502	4319
BLCA	MMP12	Apoptosis	1.6427e-05	Activation	0.770097971	4321
BLCA	MMP12	CellCycle	0.375918	None	0.187957659	4321
BLCA	MMP12	DNADamage	0.00569323	Inhibition	-0.459217541	4321
BLCA	MMP12	EMT	5.2464e-05	Activation	1.430289829	4321
BLCA	MMP12	Hormone AR	1.23349e-07	Inhibition	-1.027147592	4321
BLCA	MMP12	Hormone ER	0.335829	None	0.095156705	4321
BLCA	MMP12	PI3KAKT	0.760857	None	0.074236349	4321
BLCA	MMP12	RASMAPK	0.508517	None	0.142998253	4321
BLCA	MMP12	RTK	0.335829	None	-0.290006729	4321
BLCA	MMP12	TSCmTOR	0.505363	None	-0.131393142	4321
BLCA	MMP13	Apoptosis	0.999347	None	0.01372212	4322
BLCA	MMP13	CellCycle	0.0120891	Inhibition	-0.471188891	4322
BLCA	MMP13	DNADamage	0.00544712	Inhibition	-0.492519754	4322
BLCA	MMP13	EMT	0.0120891	Activation	0.948359994	4322
BLCA	MMP13	Hormone AR	0.00544712	Inhibition	-0.606617814	4322
BLCA	MMP13	Hormone ER	0.999347	None	-5.7525e-05	4322
BLCA	MMP13	PI3KAKT	0.575502	None	-0.229624082	4322
BLCA	MMP13	RASMAPK	0.302885	None	0.275321303	4322
BLCA	MMP13	RTK	0.999347	None	-0.07530985	4322
BLCA	MMP13	TSCmTOR	0.999347	None	0.016166217	4322
BLCA	MMP14	Apoptosis	0.0101795	Activation	0.480110872	4323
BLCA	MMP14	CellCycle	0.170337	None	-0.274966815	4323
BLCA	MMP14	DNADamage	1.07349e-06	Inhibition	-0.760305179	4323
BLCA	MMP14	EMT	5.69347e-12	Activation	2.319667759	4323
BLCA	MMP14	Hormone AR	5.69347e-12	Inhibition	-1.264237883	4323
BLCA	MMP14	Hormone ER	0.328705	None	0.08458024	4323
BLCA	MMP14	PI3KAKT	0.518201	None	-0.199286379	4323
BLCA	MMP14	RASMAPK	0.562899	None	0.112107004	4323
BLCA	MMP14	RTK	0.0329603	Inhibition	-0.547282654	4323
BLCA	MMP14	TSCmTOR	0.562899	None	-0.094067148	4323
BLCA	MMP2	Apoptosis	0.838736	None	0.052662899	4313
BLCA	MMP2	CellCycle	1.04804e-06	Inhibition	-0.857967507	4313
BLCA	MMP2	DNADamage	0.000136646	Inhibition	-0.615411611	4313
BLCA	MMP2	EMT	2.19196e-11	Activation	2.276725392	4313
BLCA	MMP2	Hormone AR	0.00317803	Inhibition	-0.579103811	4313
BLCA	MMP2	Hormone ER	0.821355	None	0.031358937	4313
BLCA	MMP2	PI3KAKT	0.0643062	None	-0.48788883	4313
BLCA	MMP2	RASMAPK	0.871892	None	-0.031088545	4313
BLCA	MMP2	RTK	0.000181067	Inhibition	-0.89597367	4313
BLCA	MMP2	TSCmTOR	0.00791957	Inhibition	-0.442510773	4313
BLCA	MMP3	Apoptosis	8.3685e-05	Activation	0.690702531	4314
BLCA	MMP3	CellCycle	0.149087	None	-0.271651312	4314
BLCA	MMP3	DNADamage	7.8378e-05	Inhibition	-0.631441666	4314
BLCA	MMP3	EMT	1.2306e-10	Activation	2.206936229	4314
BLCA	MMP3	Hormone AR	7.71749e-07	Inhibition	-0.953391974	4314
BLCA	MMP3	Hormone ER	0.195013	None	0.100283078	4314
BLCA	MMP3	PI3KAKT	0.286636	None	-0.257818745	4314
BLCA	MMP3	RASMAPK	0.286636	None	0.204294354	4314
BLCA	MMP3	RTK	0.00155682	Inhibition	-0.746986467	4314
BLCA	MMP3	TSCmTOR	0.0621759	None	-0.325745349	4314
BLCA	MMP9	Apoptosis	0.000165946	Activation	0.66291808	4318
BLCA	MMP9	CellCycle	0.38277	None	-0.159326761	4318
BLCA	MMP9	DNADamage	6.75709e-06	Inhibition	-0.707536318	4318
BLCA	MMP9	EMT	2.03931e-14	Activation	2.547303323	4318
BLCA	MMP9	Hormone AR	5.17837e-13	Inhibition	-1.317942539	4318
BLCA	MMP9	Hormone ER	0.0411872	Activation	0.157793968	4318
BLCA	MMP9	PI3KAKT	0.735109	None	0.082631125	4318
BLCA	MMP9	RASMAPK	0.218657	None	0.260393381	4318
BLCA	MMP9	RTK	0.00170195	Inhibition	-0.75518689	4318
BLCA	MMP9	TSCmTOR	0.139451	None	-0.260564158	4318
BLCA	PECAM1	Apoptosis	0.810052	None	-0.058452563	5175
BLCA	PECAM1	CellCycle	0.000768778	Inhibition	-0.614330466	5175
BLCA	PECAM1	DNADamage	0.123283	None	-0.283111024	5175
BLCA	PECAM1	EMT	1.22475e-08	Activation	1.985449332	5175
BLCA	PECAM1	Hormone AR	0.216399	None	-0.265098473	5175
BLCA	PECAM1	Hormone ER	0.00139818	Activation	0.241514631	5175
BLCA	PECAM1	PI3KAKT	0.23371	None	-0.322177294	5175
BLCA	PECAM1	RASMAPK	0.919447	None	-0.019487305	5175
BLCA	PECAM1	RTK	2.09922e-06	Inhibition	-1.136942153	5175
BLCA	PECAM1	TSCmTOR	0.192394	None	-0.24768298	5175
BLCA	SERPINE1	Apoptosis	0.00173399	Activation	0.566949921	5054
BLCA	SERPINE1	CellCycle	0.972194	None	0.005865537	5054
BLCA	SERPINE1	DNADamage	5.44314e-06	Inhibition	-0.714919688	5054
BLCA	SERPINE1	EMT	1.39902e-08	Activation	1.980276218	5054
BLCA	SERPINE1	Hormone AR	5.27806e-08	Inhibition	-1.033143689	5054
BLCA	SERPINE1	Hormone ER	0.972194	None	-0.005262071	5054
BLCA	SERPINE1	PI3KAKT	0.149638	None	-0.395726088	5054
BLCA	SERPINE1	RASMAPK	0.632452	None	-0.128298612	5054
BLCA	SERPINE1	RTK	0.00205881	Inhibition	-0.740468444	5054
BLCA	SERPINE1	TSCmTOR	0.014603	Inhibition	-0.411676028	5054
BLCA	SPP1	Apoptosis	0.00169809	Activation	0.567984783	6696
BLCA	SPP1	CellCycle	0.638751	None	-0.11038962	6696
BLCA	SPP1	DNADamage	0.0107847	Inhibition	-0.419602333	6696
BLCA	SPP1	EMT	2.70937e-08	Activation	1.91457352	6696
BLCA	SPP1	Hormone AR	6.29071e-09	Inhibition	-1.111798226	6696
BLCA	SPP1	Hormone ER	0.638751	None	0.050176627	6696
BLCA	SPP1	PI3KAKT	0.919249	None	-0.037086958	6696
BLCA	SPP1	RASMAPK	0.919249	None	-0.019542095	6696
BLCA	SPP1	RTK	0.000464763	Inhibition	-0.856099698	6696
BLCA	SPP1	TSCmTOR	0.0142633	Inhibition	-0.412383884	6696
BLCA	TIMP2	Apoptosis	0.0223357	Activation	0.41537016	7077
BLCA	TIMP2	CellCycle	0.000887347	Inhibition	-0.585733235	7077
BLCA	TIMP2	DNADamage	0.000147703	Inhibition	-0.601976002	7077
BLCA	TIMP2	EMT	6.06253e-23	Activation	3.152436699	7077
BLCA	TIMP2	Hormone AR	7.77077e-06	Inhibition	-0.859916589	7077
BLCA	TIMP2	Hormone ER	0.073664	None	0.136936697	7077
BLCA	TIMP2	PI3KAKT	0.60672	None	-0.147294674	7077
BLCA	TIMP2	RASMAPK	0.664291	None	-0.083649083	7077
BLCA	TIMP2	RTK	1.74509e-09	Inhibition	-1.395481064	7077
BLCA	TIMP2	TSCmTOR	0.219407	None	-0.212953174	7077
BLCA	TNF	Apoptosis	4.00584e-07	Activation	0.895984725	7124
BLCA	TNF	CellCycle	0.983401	None	-0.003493861	7124
BLCA	TNF	DNADamage	0.00102117	Inhibition	-0.530814621	7124
BLCA	TNF	EMT	2.6506e-05	Activation	1.480089666	7124
BLCA	TNF	Hormone AR	4.00584e-07	Inhibition	-0.972993676	7124
BLCA	TNF	Hormone ER	0.0097601	Activation	0.193993868	7124
BLCA	TNF	PI3KAKT	0.0230274	Activation	0.572278711	7124
BLCA	TNF	RASMAPK	0.00196799	Activation	0.630551018	7124
BLCA	TNF	RTK	0.148162	None	-0.339777336	7124
BLCA	TNF	TSCmTOR	0.0230274	Activation	0.371169874	7124
BLCA	TNFRSF11B	Apoptosis	0.803527	None	0.059785264	4982
BLCA	TNFRSF11B	CellCycle	0.729672	None	-0.122827738	4982
BLCA	TNFRSF11B	DNADamage	0.51653	None	-0.171335382	4982
BLCA	TNFRSF11B	EMT	0.109719	None	0.767533457	4982
BLCA	TNFRSF11B	Hormone AR	0.946223	None	-0.012473958	4982
BLCA	TNFRSF11B	Hormone ER	0.729672	None	0.046443113	4982
BLCA	TNFRSF11B	PI3KAKT	0.24738	None	-0.43466149	4982
BLCA	TNFRSF11B	RASMAPK	0.77118	None	-0.096333184	4982
BLCA	TNFRSF11B	RTK	0.034181	Inhibition	-0.661576805	4982
BLCA	TNFRSF11B	TSCmTOR	0.432109	None	-0.214501223	4982
BRCA	FGF2	Apoptosis	0.908634	None	0.012202632	2247
BRCA	FGF2	CellCycle	5.05558e-07	Inhibition	-0.69482841	2247
BRCA	FGF2	DNADamage	0.00258937	Inhibition	-0.424225183	2247
BRCA	FGF2	EMT	1.52301e-12	Activation	1.422798886	2247
BRCA	FGF2	Hormone AR	5.05558e-07	Inhibition	-1.123692548	2247
BRCA	FGF2	Hormone ER	0.0036417	Inhibition	-0.864702104	2247
BRCA	FGF2	PI3KAKT	0.767697	None	0.082634426	2247
BRCA	FGF2	RASMAPK	0.00761183	Activation	0.390711629	2247
BRCA	FGF2	RTK	0.908634	None	0.023290213	2247
BRCA	FGF2	TSCmTOR	0.000895867	Inhibition	-0.400263288	2247
BRCA	ICAM1	Apoptosis	2.24084e-18	Activation	0.923660741	3383
BRCA	ICAM1	CellCycle	0.0207071	Activation	0.32793768	3383
BRCA	ICAM1	DNADamage	0.76688	None	-0.039095305	3383
BRCA	ICAM1	EMT	3.14865e-08	Activation	1.101775478	3383
BRCA	ICAM1	Hormone AR	6.27964e-22	Inhibition	-2.068149734	3383
BRCA	ICAM1	Hormone ER	7.79747e-20	Inhibition	-2.566226667	3383
BRCA	ICAM1	PI3KAKT	0.125991	None	0.279434308	3383
BRCA	ICAM1	RASMAPK	0.0137857	Activation	0.378631686	3383
BRCA	ICAM1	RTK	0.383483	None	0.124661962	3383
BRCA	ICAM1	TSCmTOR	0.76688	None	0.037011303	3383
BRCA	ICAM3	Apoptosis	4.3642e-05	Activation	0.485846597	3385
BRCA	ICAM3	CellCycle	0.435679	None	-0.12314285	3385
BRCA	ICAM3	DNADamage	0.435679	None	-0.126912662	3385
BRCA	ICAM3	EMT	0.0228461	Activation	0.552368072	3385
BRCA	ICAM3	Hormone AR	0.220406	None	-0.362548301	3385
BRCA	ICAM3	Hormone ER	0.307465	None	-0.375052827	3385
BRCA	ICAM3	PI3KAKT	0.117156	None	0.345095553	3385
BRCA	ICAM3	RASMAPK	0.478431	None	-0.110665748	3385
BRCA	ICAM3	RTK	0.220406	None	-0.1945805	3385
BRCA	ICAM3	TSCmTOR	0.560169	None	0.065627919	3385
BRCA	ITGA2	Apoptosis	0.00278111	Inhibition	-0.330593018	3673
BRCA	ITGA2	CellCycle	2.9973e-07	Inhibition	-0.725345051	3673
BRCA	ITGA2	DNADamage	0.000732685	Inhibition	-0.46790385	3673
BRCA	ITGA2	EMT	0.000732685	Activation	0.707500704	3673
BRCA	ITGA2	Hormone AR	0.0131746	Activation	0.552192638	3673
BRCA	ITGA2	Hormone ER	0.000732685	Activation	1.020195664	3673
BRCA	ITGA2	PI3KAKT	0.569747	None	-0.093364103	3673
BRCA	ITGA2	RASMAPK	0.000732685	Activation	0.515274234	3673
BRCA	ITGA2	RTK	0.00169928	Activation	0.39833853	3673
BRCA	ITGA2	TSCmTOR	0.0137777	Inhibition	-0.281056613	3673
BRCA	LCP1	Apoptosis	2.0143e-14	Activation	0.829243831	3936
BRCA	LCP1	CellCycle	0.0572017	None	0.277710486	3936
BRCA	LCP1	DNADamage	0.83011	None	-0.028288817	3936
BRCA	LCP1	EMT	1.3916e-05	Activation	0.8829499	3936
BRCA	LCP1	Hormone AR	4.09387e-07	Inhibition	-1.131511659	3936
BRCA	LCP1	Hormone ER	5.20092e-09	Inhibition	-1.711262397	3936
BRCA	LCP1	PI3KAKT	0.00850706	Activation	0.467772881	3936
BRCA	LCP1	RASMAPK	0.577085	None	0.090458728	3936
BRCA	LCP1	RTK	0.102189	None	0.219543155	3936
BRCA	LCP1	TSCmTOR	0.176896	None	0.165515845	3936
BRCA	MMP1	Apoptosis	4.82444e-12	Activation	0.742252188	4312
BRCA	MMP1	CellCycle	2.88163e-15	Activation	1.05496315	4312
BRCA	MMP1	DNADamage	0.262029	None	0.165493863	4312
BRCA	MMP1	EMT	0.992931	None	0.009548334	4312
BRCA	MMP1	Hormone AR	1.25928e-11	Inhibition	-1.468333504	4312
BRCA	MMP1	Hormone ER	1.92374e-12	Inhibition	-2.024302996	4312
BRCA	MMP1	PI3KAKT	0.214669	None	0.235748039	4312
BRCA	MMP1	RASMAPK	0.992931	None	-0.001244301	4312
BRCA	MMP1	RTK	0.0553312	None	0.267846842	4312
BRCA	MMP1	TSCmTOR	0.0578101	None	0.237654599	4312
BRCA	MMP10	Apoptosis	0.0900083	None	-0.212185968	4319
BRCA	MMP10	CellCycle	0.00377796	Inhibition	-0.449570017	4319
BRCA	MMP10	DNADamage	0.0900083	None	-0.253854789	4319
BRCA	MMP10	EMT	0.441544	None	0.150059375	4319
BRCA	MMP10	Hormone AR	0.0039042	Activation	0.687499114	4319
BRCA	MMP10	Hormone ER	0.00377796	Activation	0.949762538	4319
BRCA	MMP10	PI3KAKT	0.199184	None	-0.230865381	4319
BRCA	MMP10	RASMAPK	0.176422	None	0.216760546	4319
BRCA	MMP10	RTK	0.409074	None	0.109845318	4319
BRCA	MMP10	TSCmTOR	0.0039042	Inhibition	-0.355676215	4319
BRCA	MMP12	Apoptosis	1.76097e-09	Activation	0.646716229	4321
BRCA	MMP12	CellCycle	3.82917e-12	Activation	0.919239059	4321
BRCA	MMP12	DNADamage	0.105813	None	0.244444657	4321
BRCA	MMP12	EMT	0.94246	None	0.014102018	4321
BRCA	MMP12	Hormone AR	3.07813e-16	Inhibition	-1.763282714	4321
BRCA	MMP12	Hormone ER	5.29808e-17	Inhibition	-2.391419184	4321
BRCA	MMP12	PI3KAKT	0.0634703	None	0.351219436	4321
BRCA	MMP12	RASMAPK	0.261023	None	-0.186634643	4321
BRCA	MMP12	RTK	0.94246	None	0.015813053	4321
BRCA	MMP12	TSCmTOR	0.28224	None	0.136448867	4321
BRCA	MMP13	Apoptosis	0.054414	None	0.225894595	4322
BRCA	MMP13	CellCycle	0.209137	None	-0.172270212	4322
BRCA	MMP13	DNADamage	0.000111659	Inhibition	-0.545085703	4322
BRCA	MMP13	EMT	4.22e-05	Activation	0.865482179	4322
BRCA	MMP13	Hormone AR	0.000111659	Inhibition	-0.875543625	4322
BRCA	MMP13	Hormone ER	0.0947845	None	-0.5197736	4322
BRCA	MMP13	PI3KAKT	0.209137	None	-0.225194706	4322
BRCA	MMP13	RASMAPK	4.22e-05	Activation	0.626164845	4322
BRCA	MMP13	RTK	0.000354311	Activation	0.459029714	4322
BRCA	MMP13	TSCmTOR	0.391754	None	-0.096312044	4322
BRCA	MMP14	Apoptosis	0.617913	None	-0.062339661	4323
BRCA	MMP14	CellCycle	0.000817046	Inhibition	-0.449892435	4323
BRCA	MMP14	DNADamage	8.93819e-08	Inhibition	-0.721583958	4323
BRCA	MMP14	EMT	2.44878e-12	Activation	1.405925313	4323
BRCA	MMP14	Hormone AR	1.53286e-08	Inhibition	-1.251416137	4323
BRCA	MMP14	Hormone ER	6.83571e-06	Inhibition	-1.302657065	4323
BRCA	MMP14	PI3KAKT	0.353784	None	0.175666429	4323
BRCA	MMP14	RASMAPK	2.04531e-09	Activation	0.867217177	4323
BRCA	MMP14	RTK	9.0752e-05	Activation	0.490943526	4323
BRCA	MMP14	TSCmTOR	0.758339	None	-0.034600356	4323
BRCA	MMP2	Apoptosis	0.733362	None	-0.036056628	4313
BRCA	MMP2	CellCycle	1.67807e-15	Inhibition	-1.03820071	4313
BRCA	MMP2	DNADamage	1.32685e-16	Inhibition	-1.095308945	4313
BRCA	MMP2	EMT	5.53744e-28	Activation	2.105812017	4313
BRCA	MMP2	Hormone AR	4.0603e-06	Inhibition	-1.008092319	4313
BRCA	MMP2	Hormone ER	0.000225769	Inhibition	-1.060759277	4313
BRCA	MMP2	PI3KAKT	0.194732	None	0.231679456	4313
BRCA	MMP2	RASMAPK	5.61081e-17	Activation	1.177409698	4313
BRCA	MMP2	RTK	2.41324e-09	Activation	0.736355621	4313
BRCA	MMP2	TSCmTOR	0.256495	None	-0.134712274	4313
BRCA	MMP3	Apoptosis	0.000878111	Activation	0.362213753	4314
BRCA	MMP3	CellCycle	0.00261938	Inhibition	-0.403004307	4314
BRCA	MMP3	DNADamage	6.75763e-07	Inhibition	-0.669182473	4314
BRCA	MMP3	EMT	2.29012e-15	Activation	1.57101196	4314
BRCA	MMP3	Hormone AR	4.28931e-07	Inhibition	-1.127772465	4314
BRCA	MMP3	Hormone ER	1.75647e-07	Inhibition	-1.544015627	4314
BRCA	MMP3	PI3KAKT	0.0819461	None	0.292687	4314
BRCA	MMP3	RASMAPK	6.75763e-07	Activation	0.711024681	4314
BRCA	MMP3	RTK	2.5419e-05	Activation	0.525457604	4314
BRCA	MMP3	TSCmTOR	0.372513	None	0.100499685	4314
BRCA	MMP9	Apoptosis	2.472e-05	Activation	0.474094947	4318
BRCA	MMP9	CellCycle	0.000335183	Activation	0.499943093	4318
BRCA	MMP9	DNADamage	0.36828	None	0.169499166	4318
BRCA	MMP9	EMT	0.936305	None	-0.024474336	4318
BRCA	MMP9	Hormone AR	8.2333e-09	Inhibition	-1.31144632	4318
BRCA	MMP9	Hormone ER	2.16579e-06	Inhibition	-1.421100811	4318
BRCA	MMP9	PI3KAKT	0.598982	None	0.132551187	4318
BRCA	MMP9	RASMAPK	0.936305	None	-0.011224089	4318
BRCA	MMP9	RTK	0.936305	None	-0.020613228	4318
BRCA	MMP9	TSCmTOR	0.36828	None	0.13780466	4318
BRCA	PECAM1	Apoptosis	0.0796773	None	0.202831472	5175
BRCA	PECAM1	CellCycle	1.09251e-08	Inhibition	-0.777476094	5175
BRCA	PECAM1	DNADamage	1.2982e-05	Inhibition	-0.607239683	5175
BRCA	PECAM1	EMT	4.20064e-12	Activation	1.395521319	5175
BRCA	PECAM1	Hormone AR	0.0397412	Inhibition	-0.500465177	5175
BRCA	PECAM1	Hormone ER	0.0379128	Inhibition	-0.6833788	5175
BRCA	PECAM1	PI3KAKT	0.973342	None	-0.005467944	5175
BRCA	PECAM1	RASMAPK	0.0657986	None	0.288790694	5175
BRCA	PECAM1	RTK	0.294802	None	0.135438648	5175
BRCA	PECAM1	TSCmTOR	0.291462	None	-0.134338311	5175
BRCA	SERPINE1	Apoptosis	0.678258	None	0.044038168	5054
BRCA	SERPINE1	CellCycle	0.000233103	Inhibition	-0.519545282	5054
BRCA	SERPINE1	DNADamage	5.63695e-07	Inhibition	-0.695032418	5054
BRCA	SERPINE1	EMT	3.2555e-11	Activation	1.342787348	5054
BRCA	SERPINE1	Hormone AR	0.0394819	Inhibition	-0.486875748	5054
BRCA	SERPINE1	Hormone ER	0.165371	None	-0.444008046	5054
BRCA	SERPINE1	PI3KAKT	0.00365546	Inhibition	-0.520108037	5054
BRCA	SERPINE1	RASMAPK	0.311522	None	0.1617113	5054
BRCA	SERPINE1	RTK	0.372931	None	0.117295804	5054
BRCA	SERPINE1	TSCmTOR	0.0132639	Inhibition	-0.305267944	5054
BRCA	SPP1	Apoptosis	0.169406	None	0.169692455	6696
BRCA	SPP1	CellCycle	0.167014	None	0.227346772	6696
BRCA	SPP1	DNADamage	0.0504509	None	-0.305967617	6696
BRCA	SPP1	EMT	0.596424	None	-0.103395016	6696
BRCA	SPP1	Hormone AR	3.83575e-07	Inhibition	-1.177172269	6696
BRCA	SPP1	Hormone ER	0.0123858	Inhibition	-0.856055275	6696
BRCA	SPP1	PI3KAKT	0.169406	None	0.24504688	6696
BRCA	SPP1	RASMAPK	0.041249	Activation	0.35077722	6696
BRCA	SPP1	RTK	0.308513	None	0.132744732	6696
BRCA	SPP1	TSCmTOR	0.169406	None	0.171883758	6696
BRCA	TIMP2	Apoptosis	0.857731	None	-0.018954958	7077
BRCA	TIMP2	CellCycle	2.42033e-10	Inhibition	-0.839636205	7077
BRCA	TIMP2	DNADamage	4.91015e-16	Inhibition	-1.082970306	7077
BRCA	TIMP2	EMT	1.53312e-18	Activation	1.724006048	7077
BRCA	TIMP2	Hormone AR	1.90217e-09	Inhibition	-1.303624767	7077
BRCA	TIMP2	Hormone ER	8.0631e-05	Inhibition	-1.131505916	7077
BRCA	TIMP2	PI3KAKT	0.135074	None	0.262765054	7077
BRCA	TIMP2	RASMAPK	4.188e-12	Activation	0.983235122	7077
BRCA	TIMP2	RTK	8.10561e-08	Activation	0.662382783	7077
BRCA	TIMP2	TSCmTOR	0.388398	None	-0.10530693	7077
BRCA	TNF	Apoptosis	8.3945e-05	Activation	0.434047345	7124
BRCA	TNF	CellCycle	9.5607e-05	Activation	0.526886789	7124
BRCA	TNF	DNADamage	0.640127	None	0.073772524	7124
BRCA	TNF	EMT	0.201274	None	0.273757712	7124
BRCA	TNF	Hormone AR	8.15608e-07	Inhibition	-1.14751972	7124
BRCA	TNF	Hormone ER	8.3945e-05	Inhibition	-1.157275142	7124
BRCA	TNF	PI3KAKT	4.923e-05	Activation	0.706832717	7124
BRCA	TNF	RASMAPK	0.0038386	Activation	0.420546752	7124
BRCA	TNF	RTK	0.80244	None	0.030515779	7124
BRCA	TNF	TSCmTOR	2.51908e-06	Activation	0.562002918	7124
BRCA	TNFRSF11B	Apoptosis	0.136347	None	-0.184936603	4982
BRCA	TNFRSF11B	CellCycle	0.000760458	Inhibition	-0.496049655	4982
BRCA	TNFRSF11B	DNADamage	0.0808958	None	-0.270911338	4982
BRCA	TNFRSF11B	EMT	0.000656572	Activation	0.776568659	4982
BRCA	TNFRSF11B	Hormone AR	0.433892	None	-0.221644199	4982
BRCA	TNFRSF11B	Hormone ER	0.861517	None	0.049379362	4982
BRCA	TNFRSF11B	PI3KAKT	0.620733	None	-0.111468095	4982
BRCA	TNFRSF11B	RASMAPK	0.000971083	Activation	0.506894585	4982
BRCA	TNFRSF11B	RTK	0.0808958	None	0.24975805	4982
BRCA	TNFRSF11B	TSCmTOR	0.861517	None	-0.030654762	4982
CESC	FGF2	Apoptosis	0.00979101	Inhibition	-0.709238127	2247
CESC	FGF2	CellCycle	0.0481387	Inhibition	-0.441338607	2247
CESC	FGF2	DNADamage	0.512596	None	-0.26151593	2247
CESC	FGF2	EMT	0.0636981	None	0.89427616	2247
CESC	FGF2	Hormone AR	0.86237	None	0.042649654	2247
CESC	FGF2	Hormone ER	0.105218	None	0.380161584	2247
CESC	FGF2	PI3KAKT	0.585494	None	-0.26157189	2247
CESC	FGF2	RASMAPK	0.86237	None	-0.065087253	2247
CESC	FGF2	RTK	0.512596	None	-0.333236073	2247
CESC	FGF2	TSCmTOR	0.677236	None	-0.125688354	2247
CESC	ICAM1	Apoptosis	0.154794	None	0.390348007	3383
CESC	ICAM1	CellCycle	0.154794	None	-0.305394502	3383
CESC	ICAM1	DNADamage	0.00605457	Inhibition	-0.844078199	3383
CESC	ICAM1	EMT	0.00605457	Activation	1.234871102	3383
CESC	ICAM1	Hormone AR	0.0879577	None	-0.556471583	3383
CESC	ICAM1	Hormone ER	0.222458	None	-0.282846562	3383
CESC	ICAM1	PI3KAKT	0.298586	None	-0.383936663	3383
CESC	ICAM1	RASMAPK	0.2005	None	0.45050081	3383
CESC	ICAM1	RTK	0.652727	None	0.164859716	3383
CESC	ICAM1	TSCmTOR	0.850161	None	-0.039047828	3383
CESC	ICAM3	Apoptosis	0.0988229	None	0.538989664	3385
CESC	ICAM3	CellCycle	0.443706	None	0.211620795	3385
CESC	ICAM3	DNADamage	0.898656	None	-0.042942018	3385
CESC	ICAM3	EMT	0.898656	None	0.050657191	3385
CESC	ICAM3	Hormone AR	0.382902	None	0.354076408	3385
CESC	ICAM3	Hormone ER	0.0988229	None	0.442573293	3385
CESC	ICAM3	PI3KAKT	0.898656	None	-0.079900844	3385
CESC	ICAM3	RASMAPK	0.297554	None	0.485681313	3385
CESC	ICAM3	RTK	0.898656	None	-0.045005619	3385
CESC	ICAM3	TSCmTOR	0.898656	None	0.02647123	3385
CESC	ITGA2	Apoptosis	0.181503	None	-0.323503617	3673
CESC	ITGA2	CellCycle	0.0714688	None	-0.396025258	3673
CESC	ITGA2	DNADamage	3.7588e-05	Inhibition	-1.148115866	3673
CESC	ITGA2	EMT	0.17253	None	0.631115817	3673
CESC	ITGA2	Hormone AR	0.00037429	Inhibition	-0.961907966	3673
CESC	ITGA2	Hormone ER	0.17253	None	-0.316922279	3673
CESC	ITGA2	PI3KAKT	0.596252	None	0.194869674	3673
CESC	ITGA2	RASMAPK	0.344172	None	0.310755446	3673
CESC	ITGA2	RTK	0.0721857	None	0.653941375	3673
CESC	ITGA2	TSCmTOR	0.801928	None	-0.052031046	3673
CESC	LCP1	Apoptosis	0.687607	None	0.285742382	3936
CESC	LCP1	CellCycle	0.965556	None	-0.045821572	3936
CESC	LCP1	DNADamage	0.687607	None	-0.281858942	3936
CESC	LCP1	EMT	0.516593	None	0.745867298	3936
CESC	LCP1	Hormone AR	0.965556	None	-0.010836368	3936
CESC	LCP1	Hormone ER	0.687607	None	0.222018945	3936
CESC	LCP1	PI3KAKT	0.787887	None	0.269170388	3936
CESC	LCP1	RASMAPK	0.965556	None	0.015521627	3936
CESC	LCP1	RTK	0.965556	None	-0.053481792	3936
CESC	LCP1	TSCmTOR	0.885708	None	-0.129487204	3936
CESC	MMP1	Apoptosis	0.661715	None	0.180178613	4312
CESC	MMP1	CellCycle	0.334851	None	0.238310244	4312
CESC	MMP1	DNADamage	0.190079	None	-0.488379555	4312
CESC	MMP1	EMT	0.317934	None	0.593509537	4312
CESC	MMP1	Hormone AR	0.18662	None	-0.521460753	4312
CESC	MMP1	Hormone ER	0.18662	None	-0.394436942	4312
CESC	MMP1	PI3KAKT	0.931021	None	0.027390768	4312
CESC	MMP1	RASMAPK	0.931021	None	0.051267639	4312
CESC	MMP1	RTK	0.913113	None	-0.141363238	4312
CESC	MMP1	TSCmTOR	0.931021	None	0.037282946	4312
CESC	MMP10	Apoptosis	0.0299797	Inhibition	-0.55360373	4319
CESC	MMP10	CellCycle	0.0820569	None	-0.350661652	4319
CESC	MMP10	DNADamage	0.00224916	Inhibition	-0.921358192	4319
CESC	MMP10	EMT	0.0399309	Activation	0.922545707	4319
CESC	MMP10	Hormone AR	0.00224916	Inhibition	-0.856589006	4319
CESC	MMP10	Hormone ER	0.0927746	None	-0.363252459	4319
CESC	MMP10	PI3KAKT	0.711612	None	0.116404483	4319
CESC	MMP10	RASMAPK	0.162358	None	0.450136974	4319
CESC	MMP10	RTK	0.711612	None	0.115206553	4319
CESC	MMP10	TSCmTOR	0.222276	None	0.279607188	4319
CESC	MMP12	Apoptosis	0.489853	None	0.275626348	4321
CESC	MMP12	CellCycle	0.606061	None	-0.178571894	4321
CESC	MMP12	DNADamage	0.0140231	Inhibition	-0.762427049	4321
CESC	MMP12	EMT	0.139851	None	0.786897957	4321
CESC	MMP12	Hormone AR	0.0140231	Inhibition	-0.771544337	4321
CESC	MMP12	Hormone ER	0.700857	None	-0.073584356	4321
CESC	MMP12	PI3KAKT	0.648124	None	0.26587414	4321
CESC	MMP12	RASMAPK	0.648124	None	0.17560285	4321
CESC	MMP12	RTK	0.648124	None	0.205120118	4321
CESC	MMP12	TSCmTOR	0.648124	None	0.113854082	4321
CESC	MMP13	Apoptosis	0.0719205	None	-0.431571287	4322
CESC	MMP13	CellCycle	0.846152	None	-0.03370182	4322
CESC	MMP13	DNADamage	0.00358854	Inhibition	-0.906934461	4322
CESC	MMP13	EMT	0.142602	None	0.606114427	4322
CESC	MMP13	Hormone AR	0.0412619	Inhibition	-0.650436251	4322
CESC	MMP13	Hormone ER	0.0673373	None	-0.405260363	4322
CESC	MMP13	PI3KAKT	0.142602	None	0.477835794	4322
CESC	MMP13	RASMAPK	0.0633986	None	0.665660977	4322
CESC	MMP13	RTK	0.142602	None	0.458056893	4322
CESC	MMP13	TSCmTOR	0.0673373	None	0.457361918	4322
CESC	MMP14	Apoptosis	0.208558	None	-0.330240977	4323
CESC	MMP14	CellCycle	0.208558	None	-0.270383053	4323
CESC	MMP14	DNADamage	0.00929351	Inhibition	-0.827487362	4323
CESC	MMP14	EMT	0.0652221	None	0.857063199	4323
CESC	MMP14	Hormone AR	0.00929351	Inhibition	-0.773167971	4323
CESC	MMP14	Hormone ER	0.0395179	Inhibition	-0.485495384	4323
CESC	MMP14	PI3KAKT	0.430049	None	0.326054894	4323
CESC	MMP14	RASMAPK	0.843176	None	-0.064843708	4323
CESC	MMP14	RTK	0.843176	None	0.059194819	4323
CESC	MMP14	TSCmTOR	0.716487	None	0.116748304	4323
CESC	MMP2	Apoptosis	0.114098	None	-0.4606252	4313
CESC	MMP2	CellCycle	0.0715301	None	-0.425742232	4313
CESC	MMP2	DNADamage	0.414521	None	-0.35799271	4313
CESC	MMP2	EMT	0.0495908	Activation	1.069472758	4313
CESC	MMP2	Hormone AR	0.659631	None	-0.132951611	4313
CESC	MMP2	Hormone ER	0.545257	None	0.192179149	4313
CESC	MMP2	PI3KAKT	0.903128	None	-0.03890783	4313
CESC	MMP2	RASMAPK	0.550201	None	-0.250300257	4313
CESC	MMP2	RTK	0.414521	None	-0.394597229	4313
CESC	MMP2	TSCmTOR	0.659631	None	-0.115142102	4313
CESC	MMP3	Apoptosis	0.757958	None	0.087811153	4314
CESC	MMP3	CellCycle	0.672928	None	-0.106990002	4314
CESC	MMP3	DNADamage	0.0106637	Inhibition	-0.757053299	4314
CESC	MMP3	EMT	0.0106637	Activation	1.163204907	4314
CESC	MMP3	Hormone AR	0.0106637	Inhibition	-0.772603961	4314
CESC	MMP3	Hormone ER	0.0868915	None	-0.403509012	4314
CESC	MMP3	PI3KAKT	0.589623	None	-0.259201822	4314
CESC	MMP3	RASMAPK	0.589623	None	0.25388118	4314
CESC	MMP3	RTK	0.469052	None	-0.361809026	4314
CESC	MMP3	TSCmTOR	0.803121	None	0.051971128	4314
CESC	MMP9	Apoptosis	0.450444	None	0.239154024	4318
CESC	MMP9	CellCycle	0.866998	None	-0.04967571	4318
CESC	MMP9	DNADamage	0.0511571	None	-0.656601425	4318
CESC	MMP9	EMT	0.148326	None	0.732615858	4318
CESC	MMP9	Hormone AR	0.0511571	None	-0.672863118	4318
CESC	MMP9	Hormone ER	0.0511571	None	-0.471303771	4318
CESC	MMP9	PI3KAKT	0.564975	None	0.238952439	4318
CESC	MMP9	RASMAPK	0.450444	None	-0.330996171	4318
CESC	MMP9	RTK	0.564975	None	-0.242921306	4318
CESC	MMP9	TSCmTOR	0.901874	None	0.025649284	4318
CESC	PECAM1	Apoptosis	0.974394	None	0.007737507	5175
CESC	PECAM1	CellCycle	0.974394	None	-0.084543511	5175
CESC	PECAM1	DNADamage	0.974394	None	-0.038639156	5175
CESC	PECAM1	EMT	0.453966	None	0.762859363	5175
CESC	PECAM1	Hormone AR	0.974394	None	0.12003602	5175
CESC	PECAM1	Hormone ER	0.721797	None	0.238463082	5175
CESC	PECAM1	PI3KAKT	0.974394	None	0.127003544	5175
CESC	PECAM1	RASMAPK	0.974394	None	-0.182584545	5175
CESC	PECAM1	RTK	0.453966	None	-0.511278397	5175
CESC	PECAM1	TSCmTOR	0.974394	None	-0.00669061	5175
CESC	SERPINE1	Apoptosis	0.673573	None	0.13444804	5054
CESC	SERPINE1	CellCycle	0.238278	None	-0.270190929	5054
CESC	SERPINE1	DNADamage	0.00230098	Inhibition	-0.906617721	5054
CESC	SERPINE1	EMT	0.0320746	Activation	1.000682186	5054
CESC	SERPINE1	Hormone AR	2.3379e-05	Inhibition	-1.151479433	5054
CESC	SERPINE1	Hormone ER	0.0448293	Inhibition	-0.457870546	5054
CESC	SERPINE1	PI3KAKT	0.432339	None	0.351973435	5054
CESC	SERPINE1	RASMAPK	0.950778	None	0.017751447	5054
CESC	SERPINE1	RTK	0.888289	None	-0.076024406	5054
CESC	SERPINE1	TSCmTOR	0.497734	None	0.193889917	5054
CESC	SPP1	Apoptosis	0.937151	None	-0.046757167	6696
CESC	SPP1	CellCycle	0.937151	None	0.078104682	6696
CESC	SPP1	DNADamage	0.621015	None	-0.335616531	6696
CESC	SPP1	EMT	0.937151	None	-0.195390725	6696
CESC	SPP1	Hormone AR	0.25754	None	-0.548350814	6696
CESC	SPP1	Hormone ER	0.731014	None	-0.199834364	6696
CESC	SPP1	PI3KAKT	0.621015	None	0.447655578	6696
CESC	SPP1	RASMAPK	0.937151	None	0.02250968	6696
CESC	SPP1	RTK	0.937151	None	0.048287443	6696
CESC	SPP1	TSCmTOR	0.937151	None	0.036636323	6696
CESC	TIMP2	Apoptosis	0.249712	None	-0.40107888	7077
CESC	TIMP2	CellCycle	0.249712	None	-0.285827611	7077
CESC	TIMP2	DNADamage	0.813362	None	-0.150426638	7077
CESC	TIMP2	EMT	0.249712	None	0.614874595	7077
CESC	TIMP2	Hormone AR	0.845975	None	-0.077127185	7077
CESC	TIMP2	Hormone ER	0.986482	None	-0.00339815	7077
CESC	TIMP2	PI3KAKT	0.226065	None	-0.7326565	7077
CESC	TIMP2	RASMAPK	0.309271	None	-0.37959021	7077
CESC	TIMP2	RTK	0.249712	None	-0.492498558	7077
CESC	TIMP2	TSCmTOR	0.845975	None	-0.075157028	7077
CESC	TNF	Apoptosis	0.636009	None	0.120662005	7124
CESC	TNF	CellCycle	0.85018	None	-0.032952886	7124
CESC	TNF	DNADamage	0.0416976	Inhibition	-0.714431218	7124
CESC	TNF	EMT	0.278107	None	0.503521093	7124
CESC	TNF	Hormone AR	0.0726946	None	-0.499538792	7124
CESC	TNF	Hormone ER	0.0497084	Inhibition	-0.46630097	7124
CESC	TNF	PI3KAKT	0.554967	None	-0.242292607	7124
CESC	TNF	RASMAPK	0.0416976	Activation	0.745375862	7124
CESC	TNF	RTK	0.0726946	None	0.636491524	7124
CESC	TNF	TSCmTOR	0.0726946	None	0.422820466	7124
CESC	TNFRSF11B	Apoptosis	0.0409942	Inhibition	-0.559518689	4982
CESC	TNFRSF11B	CellCycle	0.465608	None	-0.228054831	4982
CESC	TNFRSF11B	DNADamage	0.442215	None	-0.384445831	4982
CESC	TNFRSF11B	EMT	0.816063	None	0.246582179	4982
CESC	TNFRSF11B	Hormone AR	0.816063	None	-0.140572677	4982
CESC	TNFRSF11B	Hormone ER	0.0409942	Inhibition	-0.514876352	4982
CESC	TNFRSF11B	PI3KAKT	0.962302	None	0.026006357	4982
CESC	TNFRSF11B	RASMAPK	0.962302	None	0.060409221	4982
CESC	TNFRSF11B	RTK	0.962302	None	0.01424637	4982
CESC	TNFRSF11B	TSCmTOR	0.816063	None	0.128436052	4982
CHOL	FGF2	Apoptosis	0.798242	None	-0.49659813	2247
CHOL	FGF2	CellCycle	0.945757	None	0.021471467	2247
CHOL	FGF2	DNADamage	0.798242	None	0.346009584	2247
CHOL	FGF2	EMT	0.798242	None	0.75806901	2247
CHOL	FGF2	Hormone AR	0.798242	None	0.25922186	2247
CHOL	FGF2	Hormone ER	0.798242	None	0.369574562	2247
CHOL	FGF2	PI3KAKT	0.945757	None	0.052949273	2247
CHOL	FGF2	RASMAPK	0.798242	None	0.301656876	2247
CHOL	FGF2	RTK	0.798242	None	0.281481549	2247
CHOL	FGF2	TSCmTOR	0.945664	None	0.149678038	2247
CHOL	ICAM1	Apoptosis	0.783535	None	-0.379154934	3383
CHOL	ICAM1	CellCycle	0.556974	None	-0.502856262	3383
CHOL	ICAM1	DNADamage	0.607474	None	0.772335258	3383
CHOL	ICAM1	EMT	0.240754	None	-1.724972898	3383
CHOL	ICAM1	Hormone AR	0.976484	None	0.160411437	3383
CHOL	ICAM1	Hormone ER	0.976484	None	-0.075853898	3383
CHOL	ICAM1	PI3KAKT	0.976484	None	0.0625136	3383
CHOL	ICAM1	RASMAPK	0.976484	None	0.014733184	3383
CHOL	ICAM1	RTK	0.976484	None	-0.019870985	3383
CHOL	ICAM1	TSCmTOR	0.976484	None	-0.30415851	3383
CHOL	ICAM3	Apoptosis	0.937269	None	0.029201599	3385
CHOL	ICAM3	CellCycle	0.165078	None	0.56624751	3385
CHOL	ICAM3	DNADamage	0.542892	None	-0.49154925	3385
CHOL	ICAM3	EMT	0.148945	None	1.491477994	3385
CHOL	ICAM3	Hormone AR	0.937269	None	0.034399479	3385
CHOL	ICAM3	Hormone ER	0.165078	None	0.51770059	3385
CHOL	ICAM3	PI3KAKT	0.0062826	Activation	1.642248537	3385
CHOL	ICAM3	RASMAPK	0.239954	None	0.71223313	3385
CHOL	ICAM3	RTK	0.937269	None	0.097613677	3385
CHOL	ICAM3	TSCmTOR	0.0143479	Activation	1.326592586	3385
CHOL	ITGA2	Apoptosis	0.220936	None	-0.793262997	3673
CHOL	ITGA2	CellCycle	0.50159	None	-0.326637283	3673
CHOL	ITGA2	DNADamage	0.375481	None	0.779306676	3673
CHOL	ITGA2	EMT	0.50159	None	-0.755774081	3673
CHOL	ITGA2	Hormone AR	0.335543	None	0.651133118	3673
CHOL	ITGA2	Hormone ER	0.685508	None	0.189740741	3673
CHOL	ITGA2	PI3KAKT	0.610122	None	-0.422472494	3673
CHOL	ITGA2	RASMAPK	0.803455	None	-0.153432638	3673
CHOL	ITGA2	RTK	0.803455	None	0.08887195	3673
CHOL	ITGA2	TSCmTOR	0.335543	None	-0.753490149	3673
CHOL	LCP1	Apoptosis	0.974736	None	-0.174499921	3936
CHOL	LCP1	CellCycle	0.974736	None	0.02474356	3936
CHOL	LCP1	DNADamage	0.974736	None	-0.017824914	3936
CHOL	LCP1	EMT	0.974736	None	0.803644038	3936
CHOL	LCP1	Hormone AR	0.974736	None	-0.372636669	3936
CHOL	LCP1	Hormone ER	0.974736	None	0.098364185	3936
CHOL	LCP1	PI3KAKT	0.974736	None	0.16643458	3936
CHOL	LCP1	RASMAPK	0.974736	None	0.707289803	3936
CHOL	LCP1	RTK	0.974736	None	0.137774491	3936
CHOL	LCP1	TSCmTOR	0.974736	None	0.07142429	3936
CHOL	MMP1	Apoptosis	0.646792	None	0.385992886	4312
CHOL	MMP1	CellCycle	0.646792	None	0.245473697	4312
CHOL	MMP1	DNADamage	0.646792	None	-0.362938956	4312
CHOL	MMP1	EMT	0.790479	None	-0.258251689	4312
CHOL	MMP1	Hormone AR	0.646792	None	-0.421778794	4312
CHOL	MMP1	Hormone ER	0.790479	None	-0.081340081	4312
CHOL	MMP1	PI3KAKT	0.646792	None	0.446521307	4312
CHOL	MMP1	RASMAPK	0.646792	None	0.697263251	4312
CHOL	MMP1	RTK	0.646792	None	0.236085191	4312
CHOL	MMP1	TSCmTOR	0.646792	None	0.444280889	4312
CHOL	MMP10	Apoptosis	0.690145	None	0.318260202	4319
CHOL	MMP10	CellCycle	0.996768	None	-0.018580399	4319
CHOL	MMP10	DNADamage	0.996768	None	-0.047696237	4319
CHOL	MMP10	EMT	0.803242	None	-0.436573877	4319
CHOL	MMP10	Hormone AR	0.690145	None	-0.329762365	4319
CHOL	MMP10	Hormone ER	0.690145	None	0.257764656	4319
CHOL	MMP10	PI3KAKT	0.996768	None	0.002126753	4319
CHOL	MMP10	RASMAPK	0.690145	None	0.42943985	4319
CHOL	MMP10	RTK	0.690145	None	0.413402306	4319
CHOL	MMP10	TSCmTOR	0.690145	None	-0.548642943	4319
CHOL	MMP12	Apoptosis	0.865563	None	-0.079847907	4321
CHOL	MMP12	CellCycle	0.865563	None	0.05466794	4321
CHOL	MMP12	DNADamage	0.502824	None	-0.710080794	4321
CHOL	MMP12	EMT	0.865563	None	0.20126243	4321
CHOL	MMP12	Hormone AR	0.502824	None	-0.513335275	4321
CHOL	MMP12	Hormone ER	0.826659	None	0.248973622	4321
CHOL	MMP12	PI3KAKT	0.865563	None	0.268048243	4321
CHOL	MMP12	RASMAPK	0.297606	None	1.034573346	4321
CHOL	MMP12	RTK	0.502824	None	0.502870991	4321
CHOL	MMP12	TSCmTOR	0.865563	None	0.22054739	4321
CHOL	MMP13	Apoptosis	0.928423	None	-0.032885414	4322
CHOL	MMP13	CellCycle	0.928423	None	0.056612703	4322
CHOL	MMP13	DNADamage	0.249995	None	-1.016087744	4322
CHOL	MMP13	EMT	0.344015	None	0.967048879	4322
CHOL	MMP13	Hormone AR	0.249995	None	-0.652831164	4322
CHOL	MMP13	Hormone ER	0.584546	None	-0.24560569	4322
CHOL	MMP13	PI3KAKT	0.257128	None	0.792421883	4322
CHOL	MMP13	RASMAPK	0.249995	None	0.829910797	4322
CHOL	MMP13	RTK	0.92122	None	0.114858505	4322
CHOL	MMP13	TSCmTOR	0.249995	None	0.849382726	4322
CHOL	MMP14	Apoptosis	0.826306	None	0.121125649	4323
CHOL	MMP14	CellCycle	0.826306	None	-0.364178731	4323
CHOL	MMP14	DNADamage	0.826306	None	0.1960506	4323
CHOL	MMP14	EMT	0.860486	None	0.13345498	4323
CHOL	MMP14	Hormone AR	0.826306	None	-0.165580231	4323
CHOL	MMP14	Hormone ER	0.826306	None	0.202567948	4323
CHOL	MMP14	PI3KAKT	0.826306	None	-0.30587158	4323
CHOL	MMP14	RASMAPK	0.826306	None	0.320065365	4323
CHOL	MMP14	RTK	0.826306	None	0.191209563	4323
CHOL	MMP14	TSCmTOR	0.826306	None	-0.647201919	4323
CHOL	MMP2	Apoptosis	0.411409	None	-0.626426623	4313
CHOL	MMP2	CellCycle	0.631235	None	-0.365144664	4313
CHOL	MMP2	DNADamage	0.711096	None	0.263625943	4313
CHOL	MMP2	EMT	0.411409	None	-1.348266386	4313
CHOL	MMP2	Hormone AR	0.968942	None	0.015765676	4313
CHOL	MMP2	Hormone ER	0.711096	None	0.168396673	4313
CHOL	MMP2	PI3KAKT	0.711096	None	0.292157511	4313
CHOL	MMP2	RASMAPK	0.711096	None	0.444646649	4313
CHOL	MMP2	RTK	0.560813	None	0.471288021	4313
CHOL	MMP2	TSCmTOR	0.711096	None	-0.225129121	4313
CHOL	MMP3	Apoptosis	0.783247	None	-0.187481059	4314
CHOL	MMP3	CellCycle	0.434635	None	-0.54005518	4314
CHOL	MMP3	DNADamage	0.760597	None	-0.580055873	4314
CHOL	MMP3	EMT	0.783247	None	0.21966411	4314
CHOL	MMP3	Hormone AR	0.313112	None	-0.861253069	4314
CHOL	MMP3	Hormone ER	0.783247	None	-0.122898018	4314
CHOL	MMP3	PI3KAKT	0.783247	None	0.245336866	4314
CHOL	MMP3	RASMAPK	0.44157	None	0.728406724	4314
CHOL	MMP3	RTK	0.783247	None	0.12549814	4314
CHOL	MMP3	TSCmTOR	0.783247	None	0.250725236	4314
CHOL	MMP9	Apoptosis	0.251476	None	0.594213589	4318
CHOL	MMP9	CellCycle	0.34196	None	0.375585199	4318
CHOL	MMP9	DNADamage	0.34196	None	-0.569011488	4318
CHOL	MMP9	EMT	0.251476	None	1.305831221	4318
CHOL	MMP9	Hormone AR	0.34196	None	-0.521497668	4318
CHOL	MMP9	Hormone ER	0.97171	None	0.010860187	4318
CHOL	MMP9	PI3KAKT	0.34196	None	0.552475258	4318
CHOL	MMP9	RASMAPK	0.251476	None	0.936510749	4318
CHOL	MMP9	RTK	0.34196	None	0.400963879	4318
CHOL	MMP9	TSCmTOR	0.251476	None	0.767423338	4318
CHOL	PECAM1	Apoptosis	0.781682	None	-0.219884195	5175
CHOL	PECAM1	CellCycle	0.883678	None	0.06383793	5175
CHOL	PECAM1	DNADamage	0.781682	None	-0.274364728	5175
CHOL	PECAM1	EMT	0.883678	None	0.111017238	5175
CHOL	PECAM1	Hormone AR	0.763262	None	0.384951147	5175
CHOL	PECAM1	Hormone ER	0.15019	None	0.594379266	5175
CHOL	PECAM1	PI3KAKT	0.763262	None	0.392970956	5175
CHOL	PECAM1	RASMAPK	0.15019	None	0.994730804	5175
CHOL	PECAM1	RTK	0.0551955	None	0.901996658	5175
CHOL	PECAM1	TSCmTOR	0.763262	None	0.398522142	5175
CHOL	SERPINE1	Apoptosis	0.657504	None	-0.424275327	5054
CHOL	SERPINE1	CellCycle	0.730516	None	-0.202860147	5054
CHOL	SERPINE1	DNADamage	0.730516	None	0.325330867	5054
CHOL	SERPINE1	EMT	0.680861	None	-0.677866828	5054
CHOL	SERPINE1	Hormone AR	0.991676	None	0.004211516	5054
CHOL	SERPINE1	Hormone ER	0.657504	None	0.34479557	5054
CHOL	SERPINE1	PI3KAKT	0.760305	None	0.219769213	5054
CHOL	SERPINE1	RASMAPK	0.657504	None	0.669456694	5054
CHOL	SERPINE1	RTK	0.657504	None	0.38414965	5054
CHOL	SERPINE1	TSCmTOR	0.680861	None	-0.409906834	5054
CHOL	SPP1	Apoptosis	0.788255	None	0.136101137	6696
CHOL	SPP1	CellCycle	0.33707	None	-0.474117033	6696
CHOL	SPP1	DNADamage	0.994437	None	0.004098746	6696
CHOL	SPP1	EMT	0.314421	None	-1.322906352	6696
CHOL	SPP1	Hormone AR	0.314421	None	-0.803427072	6696
CHOL	SPP1	Hormone ER	0.314421	None	-0.506776669	6696
CHOL	SPP1	PI3KAKT	0.788255	None	-0.216823324	6696
CHOL	SPP1	RASMAPK	0.788255	None	-0.350849418	6696
CHOL	SPP1	RTK	0.788255	None	-0.265628231	6696
CHOL	SPP1	TSCmTOR	0.788255	None	-0.237341541	6696
CHOL	TIMP2	Apoptosis	0.193247	None	-0.835735104	7077
CHOL	TIMP2	CellCycle	0.755834	None	-0.282949544	7077
CHOL	TIMP2	DNADamage	0.34081	None	1.014181262	7077
CHOL	TIMP2	EMT	0.437411	None	-1.015953783	7077
CHOL	TIMP2	Hormone AR	0.437411	None	0.559261647	7077
CHOL	TIMP2	Hormone ER	0.930768	None	-0.04051109	7077
CHOL	TIMP2	PI3KAKT	0.930768	None	0.046233133	7077
CHOL	TIMP2	RASMAPK	0.907712	None	-0.244840397	7077
CHOL	TIMP2	RTK	0.907712	None	0.143652242	7077
CHOL	TIMP2	TSCmTOR	0.907712	None	-0.165411982	7077
CHOL	TNF	Apoptosis	0.964491	None	0.036116967	7124
CHOL	TNF	CellCycle	0.964491	None	-0.386396862	7124
CHOL	TNF	DNADamage	0.964491	None	-0.17607477	7124
CHOL	TNF	EMT	0.964491	None	-0.629213655	7124
CHOL	TNF	Hormone AR	0.964491	None	-0.24268373	7124
CHOL	TNF	Hormone ER	0.964491	None	0.072279358	7124
CHOL	TNF	PI3KAKT	0.964491	None	0.024771648	7124
CHOL	TNF	RASMAPK	0.964491	None	0.250213063	7124
CHOL	TNF	RTK	0.964491	None	-0.043238643	7124
CHOL	TNF	TSCmTOR	0.964491	None	0.253148147	7124
CHOL	TNFRSF11B	Apoptosis	0.284091	None	-0.513618605	4982
CHOL	TNFRSF11B	CellCycle	0.00231491	Inhibition	-1.04742439	4982
CHOL	TNFRSF11B	DNADamage	0.533392	None	0.462893826	4982
CHOL	TNFRSF11B	EMT	0.284091	None	-1.141084579	4982
CHOL	TNFRSF11B	Hormone AR	0.748788	None	-0.131194565	4982
CHOL	TNFRSF11B	Hormone ER	0.431866	None	-0.314740682	4982
CHOL	TNFRSF11B	PI3KAKT	0.0171087	Inhibition	-1.392439234	4982
CHOL	TNFRSF11B	RASMAPK	0.284091	None	-0.697805925	4982
CHOL	TNFRSF11B	RTK	0.533392	None	-0.242342805	4982
CHOL	TNFRSF11B	TSCmTOR	0.00826686	Inhibition	-1.437057359	4982
COAD	FGF2	Apoptosis	0.0691535	None	-0.556889563	2247
COAD	FGF2	CellCycle	5.938e-05	Inhibition	-0.966509892	2247
COAD	FGF2	DNADamage	0.0589348	None	-0.377711731	2247
COAD	FGF2	EMT	9.2854e-05	Activation	1.629959575	2247
COAD	FGF2	Hormone AR	0.407995	None	0.115802307	2247
COAD	FGF2	Hormone ER	0.0691535	None	0.211598064	2247
COAD	FGF2	PI3KAKT	0.100555	None	0.5460597	2247
COAD	FGF2	RASMAPK	0.0997839	None	0.607903128	2247
COAD	FGF2	RTK	0.182133	None	0.270981317	2247
COAD	FGF2	TSCmTOR	0.234626	None	0.24057886	2247
COAD	ICAM1	Apoptosis	0.0169544	Activation	0.755263998	3383
COAD	ICAM1	CellCycle	0.597805	None	-0.138811729	3383
COAD	ICAM1	DNADamage	0.0436578	Inhibition	-0.37762856	3383
COAD	ICAM1	EMT	1.5404e-05	Activation	1.808315547	3383
COAD	ICAM1	Hormone AR	0.162058	None	0.244009293	3383
COAD	ICAM1	Hormone ER	0.0404986	Activation	0.25090946	3383
COAD	ICAM1	PI3KAKT	0.597805	None	-0.187415407	3383
COAD	ICAM1	RASMAPK	0.601709	None	0.169630311	3383
COAD	ICAM1	RTK	0.376678	None	0.225810017	3383
COAD	ICAM1	TSCmTOR	0.597805	None	-0.149394416	3383
COAD	ICAM3	Apoptosis	0.793084	None	-0.0682225	3385
COAD	ICAM3	CellCycle	0.246157	None	-0.359220133	3385
COAD	ICAM3	DNADamage	0.0082973	Inhibition	-0.506852061	3385
COAD	ICAM3	EMT	0.778776	None	-0.190541094	3385
COAD	ICAM3	Hormone AR	0.4138	None	-0.161474324	3385
COAD	ICAM3	Hormone ER	0.785101	None	0.037854645	3385
COAD	ICAM3	PI3KAKT	0.327124	None	0.421064469	3385
COAD	ICAM3	RASMAPK	0.246157	None	0.534427776	3385
COAD	ICAM3	RTK	0.0082973	Activation	0.581084306	3385
COAD	ICAM3	TSCmTOR	0.492323	None	0.181964242	3385
COAD	ITGA2	Apoptosis	0.97528	None	-0.142582091	3673
COAD	ITGA2	CellCycle	0.97528	None	0.021168274	3673
COAD	ITGA2	DNADamage	0.97528	None	0.055851982	3673
COAD	ITGA2	EMT	0.97528	None	-0.210271294	3673
COAD	ITGA2	Hormone AR	0.97528	None	-0.041701872	3673
COAD	ITGA2	Hormone ER	0.659061	None	-0.134734371	3673
COAD	ITGA2	PI3KAKT	0.97528	None	-0.009376533	3673
COAD	ITGA2	RASMAPK	0.659061	None	0.416957716	3673
COAD	ITGA2	RTK	0.0262851	Activation	0.557086457	3673
COAD	ITGA2	TSCmTOR	0.97528	None	0.030520857	3673
COAD	LCP1	Apoptosis	0.71971	None	0.11891225	3936
COAD	LCP1	CellCycle	0.017539	Inhibition	-0.631900273	3936
COAD	LCP1	DNADamage	0.0289592	Inhibition	-0.417615417	3936
COAD	LCP1	EMT	1.21646e-06	Activation	2.00201647	3936
COAD	LCP1	Hormone AR	0.74794	None	0.044933577	3936
COAD	LCP1	Hormone ER	0.0625276	None	0.223918446	3936
COAD	LCP1	PI3KAKT	0.156388	None	0.505482156	3936
COAD	LCP1	RASMAPK	0.156388	None	0.548468149	3936
COAD	LCP1	RTK	0.194875	None	0.277065093	3936
COAD	LCP1	TSCmTOR	0.486479	None	0.165835485	3936
COAD	MMP1	Apoptosis	0.264723	None	0.453657876	4312
COAD	MMP1	CellCycle	0.808098	None	0.124716088	4312
COAD	MMP1	DNADamage	0.443332	None	-0.215930251	4312
COAD	MMP1	EMT	0.188607	None	0.80338559	4312
COAD	MMP1	Hormone AR	0.610965	None	0.126610174	4312
COAD	MMP1	Hormone ER	0.832846	None	0.032152495	4312
COAD	MMP1	PI3KAKT	0.808098	None	0.138798927	4312
COAD	MMP1	RASMAPK	0.579253	None	0.342808067	4312
COAD	MMP1	RTK	0.168279	None	0.444311471	4312
COAD	MMP1	TSCmTOR	0.897795	None	-0.024725386	4312
COAD	MMP10	Apoptosis	0.202002	None	-0.360580866	4319
COAD	MMP10	CellCycle	0.781162	None	-0.060432691	4319
COAD	MMP10	DNADamage	0.0441281	Inhibition	-0.416194861	4319
COAD	MMP10	EMT	0.0938048	None	-0.78663056	4319
COAD	MMP10	Hormone AR	0.128232	None	-0.246224041	4319
COAD	MMP10	Hormone ER	0.0938048	None	-0.200573556	4319
COAD	MMP10	PI3KAKT	0.137323	None	0.502849295	4319
COAD	MMP10	RASMAPK	0.0938048	None	0.684539238	4319
COAD	MMP10	RTK	0.00137596	Activation	0.699910225	4319
COAD	MMP10	TSCmTOR	0.44304	None	0.161483358	4319
COAD	MMP12	Apoptosis	0.122698	None	0.541260634	4321
COAD	MMP12	CellCycle	0.706161	None	0.091901805	4321
COAD	MMP12	DNADamage	0.0174384	Inhibition	-0.464371342	4321
COAD	MMP12	EMT	0.226502	None	0.637813161	4321
COAD	MMP12	Hormone AR	0.706161	None	0.052872277	4321
COAD	MMP12	Hormone ER	0.464722	None	0.098931817	4321
COAD	MMP12	PI3KAKT	0.226502	None	0.478083507	4321
COAD	MMP12	RASMAPK	0.311418	None	0.426884598	4321
COAD	MMP12	RTK	0.0174384	Activation	0.561833639	4321
COAD	MMP12	TSCmTOR	0.674912	None	0.11801953	4321
COAD	MMP13	Apoptosis	0.51871	None	0.189433949	4322
COAD	MMP13	CellCycle	0.505737	None	-0.194170849	4322
COAD	MMP13	DNADamage	0.188202	None	-0.284195261	4322
COAD	MMP13	EMT	0.00220576	Activation	1.41077048	4322
COAD	MMP13	Hormone AR	0.467585	None	0.151039985	4322
COAD	MMP13	Hormone ER	0.0584286	None	0.23717749	4322
COAD	MMP13	PI3KAKT	0.505737	None	0.252382699	4322
COAD	MMP13	RASMAPK	0.2041	None	0.528864355	4322
COAD	MMP13	RTK	0.0174234	Activation	0.540699141	4322
COAD	MMP13	TSCmTOR	0.936581	None	0.015329256	4322
COAD	MMP14	Apoptosis	0.884101	None	0.062607166	4323
COAD	MMP14	CellCycle	0.0435842	Inhibition	-0.53778873	4323
COAD	MMP14	DNADamage	0.0435842	Inhibition	-0.406652508	4323
COAD	MMP14	EMT	2.60255e-10	Activation	2.482356796	4323
COAD	MMP14	Hormone AR	0.377864	None	0.183518882	4323
COAD	MMP14	Hormone ER	0.0937196	None	0.208464349	4323
COAD	MMP14	PI3KAKT	0.884101	None	0.04409999	4323
COAD	MMP14	RASMAPK	0.829904	None	0.179223135	4323
COAD	MMP14	RTK	0.377864	None	0.225624672	4323
COAD	MMP14	TSCmTOR	0.884101	None	-0.041233604	4323
COAD	MMP2	Apoptosis	0.583874	None	-0.188542767	4313
COAD	MMP2	CellCycle	0.00523669	Inhibition	-0.70685185	4313
COAD	MMP2	DNADamage	0.081674	None	-0.341388479	4313
COAD	MMP2	EMT	4.06183e-07	Activation	2.07507956	4313
COAD	MMP2	Hormone AR	0.25283	None	0.200332731	4313
COAD	MMP2	Hormone ER	0.137659	None	0.181905931	4313
COAD	MMP2	PI3KAKT	0.653279	None	0.135914378	4313
COAD	MMP2	RASMAPK	0.583874	None	0.245143393	4313
COAD	MMP2	RTK	0.081674	None	0.3973437	4313
COAD	MMP2	TSCmTOR	0.630896	None	-0.110261735	4313
COAD	MMP3	Apoptosis	0.635811	None	0.276678032	4314
COAD	MMP3	CellCycle	0.635811	None	0.166003297	4314
COAD	MMP3	DNADamage	0.635811	None	-0.196956098	4314
COAD	MMP3	EMT	0.957865	None	0.042428907	4314
COAD	MMP3	Hormone AR	0.957865	None	0.007395804	4314
COAD	MMP3	Hormone ER	0.635811	None	0.087350641	4314
COAD	MMP3	PI3KAKT	0.635811	None	0.27606271	4314
COAD	MMP3	RASMAPK	0.635811	None	0.434391422	4314
COAD	MMP3	RTK	0.00060593	Activation	0.736817126	4314
COAD	MMP3	TSCmTOR	0.737952	None	-0.103480807	4314
COAD	MMP9	Apoptosis	0.472608	None	-0.207116979	4318
COAD	MMP9	CellCycle	0.0216002	Inhibition	-0.617010809	4318
COAD	MMP9	DNADamage	0.0297915	Inhibition	-0.416287759	4318
COAD	MMP9	EMT	6.01203e-07	Activation	2.043960697	4318
COAD	MMP9	Hormone AR	0.824058	None	0.031109552	4318
COAD	MMP9	Hormone ER	0.119838	None	0.188632013	4318
COAD	MMP9	PI3KAKT	0.034232	Activation	0.741193649	4318
COAD	MMP9	RASMAPK	0.124944	None	0.575373065	4318
COAD	MMP9	RTK	0.182224	None	0.283795107	4318
COAD	MMP9	TSCmTOR	0.256307	None	0.243932726	4318
COAD	PECAM1	Apoptosis	0.286227	None	-0.327370229	5175
COAD	PECAM1	CellCycle	0.000110233	Inhibition	-0.907753399	5175
COAD	PECAM1	DNADamage	0.102338	None	-0.325952935	5175
COAD	PECAM1	EMT	1.38986e-11	Activation	2.637279954	5175
COAD	PECAM1	Hormone AR	0.317044	None	0.149401056	5175
COAD	PECAM1	Hormone ER	0.000513562	Activation	0.376426877	5175
COAD	PECAM1	PI3KAKT	0.220659	None	0.453777819	5175
COAD	PECAM1	RASMAPK	0.220659	None	0.511605891	5175
COAD	PECAM1	RTK	0.286227	None	0.224164155	5175
COAD	PECAM1	TSCmTOR	0.404587	None	0.160826639	5175
COAD	SERPINE1	Apoptosis	0.996685	None	-0.001078838	5054
COAD	SERPINE1	CellCycle	0.0104145	Inhibition	-0.638710088	5054
COAD	SERPINE1	DNADamage	0.0104145	Inhibition	-0.471347055	5054
COAD	SERPINE1	EMT	7.56592e-07	Activation	2.015743439	5054
COAD	SERPINE1	Hormone AR	0.387294	None	0.153926021	5054
COAD	SERPINE1	Hormone ER	0.0205072	Activation	0.262432615	5054
COAD	SERPINE1	PI3KAKT	0.10995	None	0.57861947	5054
COAD	SERPINE1	RASMAPK	0.519252	None	0.235862639	5054
COAD	SERPINE1	RTK	0.132723	None	0.326023724	5054
COAD	SERPINE1	TSCmTOR	0.519252	None	0.139811848	5054
COAD	SPP1	Apoptosis	0.978889	None	0.006878254	6696
COAD	SPP1	CellCycle	0.00492551	Inhibition	-0.685088477	6696
COAD	SPP1	DNADamage	0.000207151	Inhibition	-0.644936573	6696
COAD	SPP1	EMT	9.20677e-08	Activation	2.152419309	6696
COAD	SPP1	Hormone AR	0.34885	None	0.162858618	6696
COAD	SPP1	Hormone ER	0.371617	None	0.104659617	6696
COAD	SPP1	PI3KAKT	0.0688996	None	0.614974311	6696
COAD	SPP1	RASMAPK	0.0688996	None	0.705513415	6696
COAD	SPP1	RTK	0.0688996	None	0.389842166	6696
COAD	SPP1	TSCmTOR	0.745058	None	0.081871848	6696
COAD	TIMP2	Apoptosis	0.0740315	None	-0.520216506	7077
COAD	TIMP2	CellCycle	0.000133046	Inhibition	-0.898581205	7077
COAD	TIMP2	DNADamage	0.0273882	Inhibition	-0.404374847	7077
COAD	TIMP2	EMT	5.68859e-10	Activation	2.438972367	7077
COAD	TIMP2	Hormone AR	0.717803	None	0.064298671	7077
COAD	TIMP2	Hormone ER	0.0273882	Activation	0.256461528	7077
COAD	TIMP2	PI3KAKT	0.412658	None	0.320681962	7077
COAD	TIMP2	RASMAPK	0.480446	None	0.282017844	7077
COAD	TIMP2	RTK	0.0694118	None	0.39260999	7077
COAD	TIMP2	TSCmTOR	0.959939	None	-0.009685172	7077
COAD	TNF	Apoptosis	0.704217	None	-0.098747846	7124
COAD	TNF	CellCycle	0.378092	None	-0.224612435	7124
COAD	TNF	DNADamage	0.0603291	None	-0.345671805	7124
COAD	TNF	EMT	0.179	None	0.623356764	7124
COAD	TNF	Hormone AR	0.257581	None	-0.18704458	7124
COAD	TNF	Hormone ER	0.704217	None	-0.044637168	7124
COAD	TNF	PI3KAKT	0.0541422	None	0.690863081	7124
COAD	TNF	RASMAPK	0.0127519	Activation	0.971399952	7124
COAD	TNF	RTK	0.0127519	Activation	0.557618002	7124
COAD	TNF	TSCmTOR	0.0412098	Activation	0.478542789	7124
COAD	TNFRSF11B	Apoptosis	0.429501	None	-0.50956208	4982
COAD	TNFRSF11B	CellCycle	0.429501	None	-0.302759044	4982
COAD	TNFRSF11B	DNADamage	0.520604	None	-0.115448233	4982
COAD	TNFRSF11B	EMT	0.763402	None	-0.116948896	4982
COAD	TNFRSF11B	Hormone AR	0.478086	None	0.148564228	4982
COAD	TNFRSF11B	Hormone ER	0.429501	None	-0.137442915	4982
COAD	TNFRSF11B	PI3KAKT	0.512389	None	0.278119387	4982
COAD	TNFRSF11B	RASMAPK	0.520604	None	0.257299822	4982
COAD	TNFRSF11B	RTK	0.471903	None	0.220810457	4982
COAD	TNFRSF11B	TSCmTOR	0.429501	None	0.300469542	4982
DLBC	FGF2	Apoptosis	0.921915	None	0.105595859	2247
DLBC	FGF2	CellCycle	0.612152	None	-0.808931239	2247
DLBC	FGF2	DNADamage	0.921915	None	0.084749778	2247
DLBC	FGF2	EMT	0.791146	None	-0.537380862	2247
DLBC	FGF2	Hormone AR	0.791146	None	-0.49232465	2247
DLBC	FGF2	Hormone ER	0.791146	None	-0.117375048	2247
DLBC	FGF2	PI3KAKT	0.921915	None	0.075559432	2247
DLBC	FGF2	RASMAPK	0.791146	None	0.438180125	2247
DLBC	FGF2	RTK	0.791146	None	0.305809011	2247
DLBC	FGF2	TSCmTOR	0.791146	None	0.292596014	2247
DLBC	ICAM1	Apoptosis	0.629249	None	0.508279021	3383
DLBC	ICAM1	CellCycle	0.782904	None	0.169281548	3383
DLBC	ICAM1	DNADamage	0.539418	None	-1.042117268	3383
DLBC	ICAM1	EMT	0.782904	None	0.169255062	3383
DLBC	ICAM1	Hormone AR	0.587242	None	-0.523077681	3383
DLBC	ICAM1	Hormone ER	0.587242	None	0.243748548	3383
DLBC	ICAM1	PI3KAKT	0.814572	None	-0.195675266	3383
DLBC	ICAM1	RASMAPK	0.782904	None	0.250161282	3383
DLBC	ICAM1	RTK	0.735122	None	0.426038621	3383
DLBC	ICAM1	TSCmTOR	0.587242	None	0.536544286	3383
DLBC	ICAM3	Apoptosis	0.589953	None	-0.55920659	3385
DLBC	ICAM3	CellCycle	0.788489	None	-0.137866008	3385
DLBC	ICAM3	DNADamage	0.788489	None	0.222440897	3385
DLBC	ICAM3	EMT	0.589953	None	-0.509990535	3385
DLBC	ICAM3	Hormone AR	0.585533	None	0.852115157	3385
DLBC	ICAM3	Hormone ER	0.788489	None	-0.05415407	3385
DLBC	ICAM3	PI3KAKT	0.589953	None	1.07572271	3385
DLBC	ICAM3	RASMAPK	0.788489	None	0.272901087	3385
DLBC	ICAM3	RTK	0.763211	None	0.444136719	3385
DLBC	ICAM3	TSCmTOR	0.788489	None	0.185684506	3385
DLBC	ITGA2	Apoptosis	0.404978	None	0.713183754	3673
DLBC	ITGA2	CellCycle	0.944282	None	-0.103990371	3673
DLBC	ITGA2	DNADamage	0.944282	None	0.166624112	3673
DLBC	ITGA2	EMT	0.808243	None	0.297841303	3673
DLBC	ITGA2	Hormone AR	0.988004	None	0.006845459	3673
DLBC	ITGA2	Hormone ER	0.808243	None	-0.145351775	3673
DLBC	ITGA2	PI3KAKT	0.404978	None	-1.187123207	3673
DLBC	ITGA2	RASMAPK	0.404978	None	-0.860592575	3673
DLBC	ITGA2	RTK	0.495999	None	-0.655070465	3673
DLBC	ITGA2	TSCmTOR	0.944282	None	0.078324529	3673
DLBC	LCP1	Apoptosis	0.692426	None	0.278010873	3936
DLBC	LCP1	CellCycle	0.724409	None	-0.154788852	3936
DLBC	LCP1	DNADamage	0.19298	None	-1.284476693	3936
DLBC	LCP1	EMT	0.724409	None	0.17620648	3936
DLBC	LCP1	Hormone AR	0.200817	None	-0.888842722	3936
DLBC	LCP1	Hormone ER	0.692426	None	0.118004659	3936
DLBC	LCP1	PI3KAKT	0.618548	None	0.780840208	3936
DLBC	LCP1	RASMAPK	0.692426	None	0.357045796	3936
DLBC	LCP1	RTK	0.333884	None	0.83045095	3936
DLBC	LCP1	TSCmTOR	0.367713	None	0.60063067	3936
DLBC	MMP1	Apoptosis	0.586626	None	0.357119915	4312
DLBC	MMP1	CellCycle	0.694226	None	0.180021435	4312
DLBC	MMP1	DNADamage	0.662002	None	0.340143028	4312
DLBC	MMP1	EMT	0.457446	None	0.467809861	4312
DLBC	MMP1	Hormone AR	0.457446	None	-0.482012403	4312
DLBC	MMP1	Hormone ER	0.359785	None	-0.307900974	4312
DLBC	MMP1	PI3KAKT	0.190151	None	-1.569449219	4312
DLBC	MMP1	RASMAPK	0.359785	None	-0.732116146	4312
DLBC	MMP1	RTK	0.0861742	None	-1.283222932	4312
DLBC	MMP1	TSCmTOR	0.457446	None	-0.397712073	4312
DLBC	MMP10	Apoptosis	0.584813	None	0.389516535	4319
DLBC	MMP10	CellCycle	0.373779	None	0.53628914	4319
DLBC	MMP10	DNADamage	0.789688	None	0.159522767	4319
DLBC	MMP10	EMT	0.655752	None	0.275967652	4319
DLBC	MMP10	Hormone AR	0.732402	None	-0.199445458	4319
DLBC	MMP10	Hormone ER	0.0373656	Inhibition	-0.462661764	4319
DLBC	MMP10	PI3KAKT	0.0373656	Inhibition	-1.899739063	4319
DLBC	MMP10	RASMAPK	0.0373656	Inhibition	-1.301505875	4319
DLBC	MMP10	RTK	0.0373656	Inhibition	-1.162157636	4319
DLBC	MMP10	TSCmTOR	0.0373656	Inhibition	-0.951120875	4319
DLBC	MMP12	Apoptosis	0.376248	None	0.873047454	4321
DLBC	MMP12	CellCycle	0.425468	None	-0.548760068	4321
DLBC	MMP12	DNADamage	0.376248	None	-0.789366593	4321
DLBC	MMP12	EMT	0.493351	None	-0.445338524	4321
DLBC	MMP12	Hormone AR	0.376248	None	-0.657646603	4321
DLBC	MMP12	Hormone ER	0.664274	None	0.122146679	4321
DLBC	MMP12	PI3KAKT	0.771424	None	0.275404372	4321
DLBC	MMP12	RASMAPK	0.664274	None	0.316582786	4321
DLBC	MMP12	RTK	0.376248	None	0.707851837	4321
DLBC	MMP12	TSCmTOR	0.771424	None	0.11989034	4321
DLBC	MMP13	Apoptosis	0.333604	None	0.618471728	4322
DLBC	MMP13	CellCycle	0.395204	None	0.43584109	4322
DLBC	MMP13	DNADamage	0.44749	None	0.546239849	4322
DLBC	MMP13	EMT	0.0611305	None	1.073709382	4322
DLBC	MMP13	Hormone AR	0.793651	None	-0.111514568	4322
DLBC	MMP13	Hormone ER	0.137367	None	-0.369738553	4322
DLBC	MMP13	PI3KAKT	0.0154568	Inhibition	-2.504093785	4322
DLBC	MMP13	RASMAPK	0.0779865	None	-1.04624143	4322
DLBC	MMP13	RTK	0.0411326	Inhibition	-1.297866017	4322
DLBC	MMP13	TSCmTOR	0.0411326	Inhibition	-0.917331326	4322
DLBC	MMP14	Apoptosis	0.374938	None	0.720120471	4323
DLBC	MMP14	CellCycle	0.915463	None	-0.101047283	4323
DLBC	MMP14	DNADamage	0.374938	None	-0.613102589	4323
DLBC	MMP14	EMT	0.374938	None	0.835909716	4323
DLBC	MMP14	Hormone AR	0.374938	None	-0.482986218	4323
DLBC	MMP14	Hormone ER	0.97725	None	-0.005620306	4323
DLBC	MMP14	PI3KAKT	0.374938	None	-1.380999244	4323
DLBC	MMP14	RASMAPK	0.374938	None	-0.651463731	4323
DLBC	MMP14	RTK	0.374938	None	-0.73877383	4323
DLBC	MMP14	TSCmTOR	0.70674	None	-0.230457023	4323
DLBC	MMP2	Apoptosis	0.940924	None	0.034237898	4313
DLBC	MMP2	CellCycle	0.765414	None	0.189631795	4313
DLBC	MMP2	DNADamage	0.484817	None	-0.521222402	4313
DLBC	MMP2	EMT	0.250953	None	1.005389601	4313
DLBC	MMP2	Hormone AR	0.250953	None	-0.675956008	4313
DLBC	MMP2	Hormone ER	0.703691	None	-0.111399427	4313
DLBC	MMP2	PI3KAKT	0.250953	None	-1.320247828	4313
DLBC	MMP2	RASMAPK	0.484817	None	-0.53093909	4313
DLBC	MMP2	RTK	0.250953	None	-0.944120202	4313
DLBC	MMP2	TSCmTOR	0.386229	None	-0.52566769	4313
DLBC	MMP3	Apoptosis	0.581152	None	0.274869998	4314
DLBC	MMP3	CellCycle	0.360809	None	0.533065818	4314
DLBC	MMP3	DNADamage	0.535668	None	0.447898143	4314
DLBC	MMP3	EMT	0.103412	None	0.930754624	4314
DLBC	MMP3	Hormone AR	0.535668	None	-0.316481679	4314
DLBC	MMP3	Hormone ER	0.0571716	None	-0.498821354	4314
DLBC	MMP3	PI3KAKT	0.0571716	None	-1.80752464	4314
DLBC	MMP3	RASMAPK	0.283645	None	-0.689411898	4314
DLBC	MMP3	RTK	0.0571716	None	-1.305880422	4314
DLBC	MMP3	TSCmTOR	0.283645	None	-0.554281839	4314
DLBC	MMP9	Apoptosis	0.773689	None	0.267496564	4318
DLBC	MMP9	CellCycle	0.773689	None	-0.173300937	4318
DLBC	MMP9	DNADamage	0.773689	None	-0.403728961	4318
DLBC	MMP9	EMT	0.965347	None	-0.01908696	4318
DLBC	MMP9	Hormone AR	0.773689	None	0.197996975	4318
DLBC	MMP9	Hormone ER	0.277888	None	0.430296579	4318
DLBC	MMP9	PI3KAKT	0.773689	None	-0.794574276	4318
DLBC	MMP9	RASMAPK	0.773689	None	-0.439798519	4318
DLBC	MMP9	RTK	0.773689	None	-0.248916228	4318
DLBC	MMP9	TSCmTOR	0.773689	None	-0.342363308	4318
DLBC	PECAM1	Apoptosis	0.314701	None	0.775608644	5175
DLBC	PECAM1	CellCycle	0.470066	None	-0.419184051	5175
DLBC	PECAM1	DNADamage	0.314701	None	-0.871087264	5175
DLBC	PECAM1	EMT	0.579498	None	0.270970435	5175
DLBC	PECAM1	Hormone AR	0.314701	None	-0.832190646	5175
DLBC	PECAM1	Hormone ER	0.314701	None	0.308644173	5175
DLBC	PECAM1	PI3KAKT	0.314701	None	-1.027975536	5175
DLBC	PECAM1	RASMAPK	0.470066	None	-0.439173612	5175
DLBC	PECAM1	RTK	0.314701	None	-0.667107665	5175
DLBC	PECAM1	TSCmTOR	0.579498	None	-0.227853574	5175
DLBC	SERPINE1	Apoptosis	0.214392	None	0.66553516	5054
DLBC	SERPINE1	CellCycle	0.214392	None	0.600034648	5054
DLBC	SERPINE1	DNADamage	0.574202	None	0.328735901	5054
DLBC	SERPINE1	EMT	0.0706598	None	0.866747385	5054
DLBC	SERPINE1	Hormone AR	0.477246	None	-0.358048047	5054
DLBC	SERPINE1	Hormone ER	0.140816	None	-0.340566396	5054
DLBC	SERPINE1	PI3KAKT	0.00367279	Inhibition	-2.367505494	5054
DLBC	SERPINE1	RASMAPK	0.0276406	Inhibition	-1.222475191	5054
DLBC	SERPINE1	RTK	0.00367279	Inhibition	-1.649378991	5054
DLBC	SERPINE1	TSCmTOR	0.0276406	Inhibition	-1.006611224	5054
DLBC	SPP1	Apoptosis	0.17953	None	0.888331086	6696
DLBC	SPP1	CellCycle	0.750594	None	0.234454728	6696
DLBC	SPP1	DNADamage	0.354519	None	-0.752058314	6696
DLBC	SPP1	EMT	0.17953	None	0.895995117	6696
DLBC	SPP1	Hormone AR	0.17953	None	-0.84003859	6696
DLBC	SPP1	Hormone ER	0.794722	None	-0.064012918	6696
DLBC	SPP1	PI3KAKT	0.354519	None	-0.951995006	6696
DLBC	SPP1	RASMAPK	0.750594	None	-0.301933902	6696
DLBC	SPP1	RTK	0.354519	None	-0.716673905	6696
DLBC	SPP1	TSCmTOR	0.794722	None	-0.106278716	6696
DLBC	TIMP2	Apoptosis	0.0496364	Activation	1.189081628	7077
DLBC	TIMP2	CellCycle	0.825248	None	-0.098141657	7077
DLBC	TIMP2	DNADamage	0.0967526	None	-1.197166268	7077
DLBC	TIMP2	EMT	0.526535	None	0.45996863	7077
DLBC	TIMP2	Hormone AR	0.00926587	Inhibition	-1.353030843	7077
DLBC	TIMP2	Hormone ER	0.825248	None	0.053294803	7077
DLBC	TIMP2	PI3KAKT	0.526535	None	-0.898936937	7077
DLBC	TIMP2	RASMAPK	0.825248	None	-0.151229656	7077
DLBC	TIMP2	RTK	0.526535	None	-0.520787731	7077
DLBC	TIMP2	TSCmTOR	0.825248	None	0.174492291	7077
DLBC	TNF	Apoptosis	0.45537	None	0.442071095	7124
DLBC	TNF	CellCycle	0.574313	None	-0.251005617	7124
DLBC	TNF	DNADamage	0.117846	None	-1.185887924	7124
DLBC	TNF	EMT	0.513548	None	-0.307617547	7124
DLBC	TNF	Hormone AR	0.414465	None	-0.494513703	7124
DLBC	TNF	Hormone ER	0.0636007	None	0.471223876	7124
DLBC	TNF	PI3KAKT	0.242723	None	1.10663301	7124
DLBC	TNF	RASMAPK	0.142995	None	0.92198796	7124
DLBC	TNF	RTK	0.146628	None	0.89423029	7124
DLBC	TNF	TSCmTOR	0.0244415	Activation	1.194698516	7124
DLBC	TNFRSF11B	Apoptosis	0.566215	None	-0.781214097	4982
DLBC	TNFRSF11B	CellCycle	0.566215	None	0.601686067	4982
DLBC	TNFRSF11B	DNADamage	0.566215	None	0.827193509	4982
DLBC	TNFRSF11B	EMT	0.906549	None	-0.050135146	4982
DLBC	TNFRSF11B	Hormone AR	0.730888	None	0.473784989	4982
DLBC	TNFRSF11B	Hormone ER	0.87072	None	0.062499169	4982
DLBC	TNFRSF11B	PI3KAKT	0.87072	None	0.210816921	4982
DLBC	TNFRSF11B	RASMAPK	0.87072	None	0.16437326	4982
DLBC	TNFRSF11B	RTK	0.825566	None	0.41780523	4982
DLBC	TNFRSF11B	TSCmTOR	0.87072	None	0.133611722	4982
ESCA	FGF2	Apoptosis	0.969279	None	0.03734997	2247
ESCA	FGF2	CellCycle	0.378013	None	-0.314798727	2247
ESCA	FGF2	DNADamage	0.98577	None	0.005746183	2247
ESCA	FGF2	EMT	0.00675885	Activation	1.593391972	2247
ESCA	FGF2	Hormone AR	0.398913	None	-0.353528029	2247
ESCA	FGF2	Hormone ER	0.740632	None	0.077983378	2247
ESCA	FGF2	PI3KAKT	0.378013	None	0.426385581	2247
ESCA	FGF2	RASMAPK	0.740632	None	-0.164231553	2247
ESCA	FGF2	RTK	0.00731998	Inhibition	-1.21187895	2247
ESCA	FGF2	TSCmTOR	0.770461	None	-0.11682781	2247
ESCA	ICAM1	Apoptosis	0.00901018	Activation	0.74802527	3383
ESCA	ICAM1	CellCycle	0.636785	None	-0.218598576	3383
ESCA	ICAM1	DNADamage	0.636785	None	-0.279122597	3383
ESCA	ICAM1	EMT	0.0631866	None	1.197545877	3383
ESCA	ICAM1	Hormone AR	0.656984	None	-0.194169339	3383
ESCA	ICAM1	Hormone ER	0.165299	None	0.230176699	3383
ESCA	ICAM1	PI3KAKT	0.656984	None	-0.178459959	3383
ESCA	ICAM1	RASMAPK	0.928948	None	-0.022326213	3383
ESCA	ICAM1	RTK	0.165299	None	-0.682463262	3383
ESCA	ICAM1	TSCmTOR	0.832231	None	0.075203474	3383
ESCA	ICAM3	Apoptosis	0.885397	None	0.066862143	3385
ESCA	ICAM3	CellCycle	0.703122	None	-0.15550898	3385
ESCA	ICAM3	DNADamage	0.886635	None	0.045844302	3385
ESCA	ICAM3	EMT	0.701238	None	-0.393317068	3385
ESCA	ICAM3	Hormone AR	0.153674	None	0.521454663	3385
ESCA	ICAM3	Hormone ER	0.153674	None	0.215256314	3385
ESCA	ICAM3	PI3KAKT	0.885397	None	-0.07180361	3385
ESCA	ICAM3	RASMAPK	0.153674	None	0.453543377	3385
ESCA	ICAM3	RTK	0.153674	None	0.740506639	3385
ESCA	ICAM3	TSCmTOR	0.123617	None	0.575965874	3385
ESCA	ITGA2	Apoptosis	0.551456	None	-0.21152866	3673
ESCA	ITGA2	CellCycle	0.551456	None	-0.266871074	3673
ESCA	ITGA2	DNADamage	0.551456	None	-0.30407787	3673
ESCA	ITGA2	EMT	0.551456	None	0.422609569	3673
ESCA	ITGA2	Hormone AR	0.307309	None	-0.497569075	3673
ESCA	ITGA2	Hormone ER	0.307309	None	-0.228261837	3673
ESCA	ITGA2	PI3KAKT	0.923982	None	-0.084572267	3673
ESCA	ITGA2	RASMAPK	0.923982	None	-0.024062434	3673
ESCA	ITGA2	RTK	0.923982	None	0.044371485	3673
ESCA	ITGA2	TSCmTOR	0.551456	None	-0.269334553	3673
ESCA	LCP1	Apoptosis	0.00627224	Activation	0.753834955	3936
ESCA	LCP1	CellCycle	0.886249	None	-0.082079883	3936
ESCA	LCP1	DNADamage	0.764143	None	-0.222449408	3936
ESCA	LCP1	EMT	0.00627224	Activation	1.525860836	3936
ESCA	LCP1	Hormone AR	0.509728	None	-0.307693356	3936
ESCA	LCP1	Hormone ER	0.0238706	Activation	0.314176851	3936
ESCA	LCP1	PI3KAKT	0.897287	None	0.042207357	3936
ESCA	LCP1	RASMAPK	0.897287	None	-0.032324544	3936
ESCA	LCP1	RTK	0.0831964	None	-0.804276774	3936
ESCA	LCP1	TSCmTOR	0.764143	None	-0.146303241	3936
ESCA	MMP1	Apoptosis	0.83471	None	0.166909429	4312
ESCA	MMP1	CellCycle	0.660174	None	0.334072947	4312
ESCA	MMP1	DNADamage	0.83471	None	-0.132506635	4312
ESCA	MMP1	EMT	0.660174	None	0.8803452	4312
ESCA	MMP1	Hormone AR	0.83471	None	-0.114504805	4312
ESCA	MMP1	Hormone ER	0.83471	None	0.075025889	4312
ESCA	MMP1	PI3KAKT	0.83471	None	-0.059031543	4312
ESCA	MMP1	RASMAPK	0.83471	None	0.262635304	4312
ESCA	MMP1	RTK	0.83471	None	-0.086450033	4312
ESCA	MMP1	TSCmTOR	0.83471	None	-0.075316959	4312
ESCA	MMP10	Apoptosis	0.51262	None	0.254616116	4319
ESCA	MMP10	CellCycle	0.65973	None	0.162189436	4319
ESCA	MMP10	DNADamage	0.275944	None	-0.53816102	4319
ESCA	MMP10	EMT	0.453132	None	0.662701064	4319
ESCA	MMP10	Hormone AR	0.275944	None	-0.470049909	4319
ESCA	MMP10	Hormone ER	0.97775	None	0.00343928	4319
ESCA	MMP10	PI3KAKT	0.97775	None	-0.030428722	4319
ESCA	MMP10	RASMAPK	0.97775	None	-0.05829923	4319
ESCA	MMP10	RTK	0.65973	None	-0.280398831	4319
ESCA	MMP10	TSCmTOR	0.275944	None	-0.431139083	4319
ESCA	MMP12	Apoptosis	0.0518311	None	0.545064499	4321
ESCA	MMP12	CellCycle	0.561369	None	0.129872836	4321
ESCA	MMP12	DNADamage	0.0693596	None	-0.648952075	4321
ESCA	MMP12	EMT	0.0693596	None	0.980839999	4321
ESCA	MMP12	Hormone AR	0.0518311	None	-0.670513106	4321
ESCA	MMP12	Hormone ER	0.534724	None	0.094957544	4321
ESCA	MMP12	PI3KAKT	0.0518311	None	-0.644005026	4321
ESCA	MMP12	RASMAPK	0.561369	None	-0.161307381	4321
ESCA	MMP12	RTK	0.182262	None	-0.569854015	4321
ESCA	MMP12	TSCmTOR	0.0518311	None	-0.536815223	4321
ESCA	MMP13	Apoptosis	0.534987	None	0.14695997	4322
ESCA	MMP13	CellCycle	0.393798	None	-0.234993836	4322
ESCA	MMP13	DNADamage	0.314836	None	-0.459742048	4322
ESCA	MMP13	EMT	0.000489544	Activation	1.855393026	4322
ESCA	MMP13	Hormone AR	2.4135e-05	Inhibition	-1.28330302	4322
ESCA	MMP13	Hormone ER	0.434362	None	0.10938233	4322
ESCA	MMP13	PI3KAKT	0.393798	None	-0.335735477	4322
ESCA	MMP13	RASMAPK	0.393798	None	-0.273740733	4322
ESCA	MMP13	RTK	0.000489544	Inhibition	-1.454148466	4322
ESCA	MMP13	TSCmTOR	0.059696	None	-0.529501729	4322
ESCA	MMP14	Apoptosis	0.8397	None	-0.062202419	4323
ESCA	MMP14	CellCycle	0.8397	None	-0.055911369	4323
ESCA	MMP14	DNADamage	0.766763	None	-0.19876822	4323
ESCA	MMP14	EMT	0.000322358	Activation	1.896091875	4323
ESCA	MMP14	Hormone AR	0.000941204	Inhibition	-0.979201737	4323
ESCA	MMP14	Hormone ER	0.8397	None	0.024828846	4323
ESCA	MMP14	PI3KAKT	0.766763	None	-0.184136159	4323
ESCA	MMP14	RASMAPK	0.0258243	Inhibition	-0.631006788	4323
ESCA	MMP14	RTK	0.00020267	Inhibition	-1.554023257	4323
ESCA	MMP14	TSCmTOR	0.0910524	None	-0.464697419	4323
ESCA	MMP2	Apoptosis	0.716092	None	-0.154820111	4313
ESCA	MMP2	CellCycle	0.63933	None	-0.19746297	4313
ESCA	MMP2	DNADamage	0.867111	None	-0.125142603	4313
ESCA	MMP2	EMT	0.0166408	Activation	1.420802385	4313
ESCA	MMP2	Hormone AR	0.00538414	Inhibition	-0.91957702	4313
ESCA	MMP2	Hormone ER	0.960155	None	-0.006149504	4313
ESCA	MMP2	PI3KAKT	0.960155	None	0.04279254	4313
ESCA	MMP2	RASMAPK	0.63933	None	-0.240998841	4313
ESCA	MMP2	RTK	0.0517547	None	-0.909863681	4313
ESCA	MMP2	TSCmTOR	0.62891	None	-0.268451135	4313
ESCA	MMP3	Apoptosis	0.859956	None	0.041314357	4314
ESCA	MMP3	CellCycle	0.837704	None	-0.101512922	4314
ESCA	MMP3	DNADamage	0.837704	None	0.107097611	4314
ESCA	MMP3	EMT	0.837704	None	0.379306323	4314
ESCA	MMP3	Hormone AR	0.837704	None	0.085419605	4314
ESCA	MMP3	Hormone ER	0.837704	None	0.076356823	4314
ESCA	MMP3	PI3KAKT	0.837704	None	0.199465235	4314
ESCA	MMP3	RASMAPK	0.837704	None	0.400621908	4314
ESCA	MMP3	RTK	0.837704	None	0.310473696	4314
ESCA	MMP3	TSCmTOR	0.837704	None	0.182824593	4314
ESCA	MMP9	Apoptosis	0.0184017	Activation	0.625360853	4318
ESCA	MMP9	CellCycle	0.994646	None	0.001503239	4318
ESCA	MMP9	DNADamage	0.0595248	None	-0.647926991	4318
ESCA	MMP9	EMT	0.00505234	Activation	1.646702471	4318
ESCA	MMP9	Hormone AR	0.0335358	Inhibition	-0.641640742	4318
ESCA	MMP9	Hormone ER	0.0963158	None	0.205463952	4318
ESCA	MMP9	PI3KAKT	0.0595248	None	-0.583352558	4318
ESCA	MMP9	RASMAPK	0.0660662	None	-0.481458411	4318
ESCA	MMP9	RTK	0.0112576	Inhibition	-1.138088265	4318
ESCA	MMP9	TSCmTOR	0.0184017	Inhibition	-0.620587298	4318
ESCA	PECAM1	Apoptosis	0.629092	None	0.179963355	5175
ESCA	PECAM1	CellCycle	0.33309	None	-0.371059805	5175
ESCA	PECAM1	DNADamage	0.629092	None	-0.247701249	5175
ESCA	PECAM1	EMT	0.84072	None	0.100001084	5175
ESCA	PECAM1	Hormone AR	0.629092	None	0.232568254	5175
ESCA	PECAM1	Hormone ER	0.629092	None	0.132251731	5175
ESCA	PECAM1	PI3KAKT	0.84072	None	0.061392858	5175
ESCA	PECAM1	RASMAPK	0.33309	None	0.411452442	5175
ESCA	PECAM1	RTK	0.84072	None	0.074596523	5175
ESCA	PECAM1	TSCmTOR	0.33309	None	0.486391988	5175
ESCA	SERPINE1	Apoptosis	0.0903711	None	0.429786431	5054
ESCA	SERPINE1	CellCycle	0.279746	None	-0.296544318	5054
ESCA	SERPINE1	DNADamage	0.0100038	Inhibition	-0.941051915	5054
ESCA	SERPINE1	EMT	0.031039	Activation	1.241485979	5054
ESCA	SERPINE1	Hormone AR	9.912e-05	Inhibition	-1.14122054	5054
ESCA	SERPINE1	Hormone ER	0.967382	None	0.00527382	5054
ESCA	SERPINE1	PI3KAKT	0.716906	None	-0.132518766	5054
ESCA	SERPINE1	RASMAPK	0.642849	None	-0.161706188	5054
ESCA	SERPINE1	RTK	0.031039	Inhibition	-0.947248303	5054
ESCA	SERPINE1	TSCmTOR	0.0555088	None	-0.506973717	5054
ESCA	SPP1	Apoptosis	0.535283	None	0.163450917	6696
ESCA	SPP1	CellCycle	0.766885	None	-0.068335807	6696
ESCA	SPP1	DNADamage	0.208054	None	-0.465003905	6696
ESCA	SPP1	EMT	0.0040369	Activation	1.533419866	6696
ESCA	SPP1	Hormone AR	0.0040369	Inhibition	-0.867340111	6696
ESCA	SPP1	Hormone ER	0.394891	None	0.123823338	6696
ESCA	SPP1	PI3KAKT	0.164441	None	-0.454083751	6696
ESCA	SPP1	RASMAPK	0.0307166	Inhibition	-0.59375827	6696
ESCA	SPP1	RTK	2.6523e-05	Inhibition	-1.688772564	6696
ESCA	SPP1	TSCmTOR	0.00255115	Inhibition	-0.794258121	6696
ESCA	TIMP2	Apoptosis	0.483018	None	-0.221237258	7077
ESCA	TIMP2	CellCycle	0.0782814	None	-0.533882414	7077
ESCA	TIMP2	DNADamage	0.483018	None	0.306967094	7077
ESCA	TIMP2	EMT	0.076809	None	1.265730854	7077
ESCA	TIMP2	Hormone AR	0.483018	None	-0.272678008	7077
ESCA	TIMP2	Hormone ER	0.527785	None	-0.075405777	7077
ESCA	TIMP2	PI3KAKT	0.483018	None	0.271315082	7077
ESCA	TIMP2	RASMAPK	0.527785	None	-0.171034155	7077
ESCA	TIMP2	RTK	0.101907	None	-0.809839537	7077
ESCA	TIMP2	TSCmTOR	0.527785	None	0.16386593	7077
ESCA	TNF	Apoptosis	0.363683	None	0.30269573	7124
ESCA	TNF	CellCycle	0.763312	None	-0.069668339	7124
ESCA	TNF	DNADamage	0.128868	None	-0.738097964	7124
ESCA	TNF	EMT	0.0788739	None	1.301236613	7124
ESCA	TNF	Hormone AR	0.200705	None	-0.477296468	7124
ESCA	TNF	Hormone ER	0.363683	None	0.150323153	7124
ESCA	TNF	PI3KAKT	0.363683	None	0.320433895	7124
ESCA	TNF	RASMAPK	0.200705	None	0.480826897	7124
ESCA	TNF	RTK	0.588401	None	-0.232062712	7124
ESCA	TNF	TSCmTOR	0.579151	None	0.167740874	7124
ESCA	TNFRSF11B	Apoptosis	0.386781	None	-0.254661283	4982
ESCA	TNFRSF11B	CellCycle	0.593522	None	-0.140540025	4982
ESCA	TNFRSF11B	DNADamage	0.386781	None	0.359796336	4982
ESCA	TNFRSF11B	EMT	0.229422	None	-0.818901989	4982
ESCA	TNFRSF11B	Hormone AR	0.000178431	Activation	1.085095842	4982
ESCA	TNFRSF11B	Hormone ER	0.785449	None	-0.033237374	4982
ESCA	TNFRSF11B	PI3KAKT	0.386781	None	-0.28316106	4982
ESCA	TNFRSF11B	RASMAPK	0.260979	None	0.37908908	4982
ESCA	TNFRSF11B	RTK	0.000178431	Activation	1.541482335	4982
ESCA	TNFRSF11B	TSCmTOR	0.0953167	None	0.510841277	4982
GBM	FGF2	Apoptosis	0.389124	None	-0.426647728	2247
GBM	FGF2	CellCycle	0.000213402	Inhibition	-1.508128121	2247
GBM	FGF2	DNADamage	0.389124	None	-0.365437237	2247
GBM	FGF2	EMT	0.766063	None	0.085112294	2247
GBM	FGF2	Hormone AR	0.766063	None	0.093109492	2247
GBM	FGF2	Hormone ER	0.405248	None	0.252398108	2247
GBM	FGF2	PI3KAKT	0.766063	None	-0.350413869	2247
GBM	FGF2	RASMAPK	0.224438	None	1.034528466	2247
GBM	FGF2	RTK	0.766063	None	-0.159807498	2247
GBM	FGF2	TSCmTOR	0.766063	None	-0.137847791	2247
GBM	ICAM1	Apoptosis	0.415277	None	0.391028488	3383
GBM	ICAM1	CellCycle	0.744212	None	-0.23901163	3383
GBM	ICAM1	DNADamage	0.415277	None	-0.467209294	3383
GBM	ICAM1	EMT	0.415277	None	0.284500302	3383
GBM	ICAM1	Hormone AR	0.415277	None	-0.194290189	3383
GBM	ICAM1	Hormone ER	0.415277	None	-0.313779848	3383
GBM	ICAM1	PI3KAKT	0.856089	None	0.100718015	3383
GBM	ICAM1	RASMAPK	0.756136	None	0.268800385	3383
GBM	ICAM1	RTK	0.415277	None	-0.551642727	3383
GBM	ICAM1	TSCmTOR	0.856089	None	-0.109072661	3383
GBM	ICAM3	Apoptosis	0.593467	None	0.332561466	3385
GBM	ICAM3	CellCycle	0.801132	None	-0.248412872	3385
GBM	ICAM3	DNADamage	0.530448	None	-0.34800755	3385
GBM	ICAM3	EMT	0.416811	None	0.353751297	3385
GBM	ICAM3	Hormone AR	0.864912	None	-0.029037265	3385
GBM	ICAM3	Hormone ER	0.864912	None	-0.048077733	3385
GBM	ICAM3	PI3KAKT	0.801132	None	-0.321623026	3385
GBM	ICAM3	RASMAPK	0.416811	None	0.884248595	3385
GBM	ICAM3	RTK	0.593467	None	0.48419412	3385
GBM	ICAM3	TSCmTOR	0.846085	None	-0.192388678	3385
GBM	ITGA2	Apoptosis	0.677367	None	-0.209721467	3673
GBM	ITGA2	CellCycle	0.616617	None	-0.454065216	3673
GBM	ITGA2	DNADamage	0.476946	None	-0.418049568	3673
GBM	ITGA2	EMT	0.330617	None	0.427985248	3673
GBM	ITGA2	Hormone AR	0.877541	None	0.065899124	3673
GBM	ITGA2	Hormone ER	0.651685	None	-0.206317883	3673
GBM	ITGA2	PI3KAKT	0.95551	None	-0.031130631	3673
GBM	ITGA2	RASMAPK	0.651685	None	0.478713318	3673
GBM	ITGA2	RTK	0.476946	None	0.676036801	3673
GBM	ITGA2	TSCmTOR	0.95551	None	-0.08332249	3673
GBM	LCP1	Apoptosis	0.782771	None	0.081355489	3936
GBM	LCP1	CellCycle	0.568952	None	-0.356145638	3936
GBM	LCP1	DNADamage	0.568952	None	-0.274200392	3936
GBM	LCP1	EMT	0.743892	None	0.127573353	3936
GBM	LCP1	Hormone AR	0.782771	None	-0.08260485	3936
GBM	LCP1	Hormone ER	0.568952	None	-0.305304727	3936
GBM	LCP1	PI3KAKT	0.782771	None	0.152414223	3936
GBM	LCP1	RASMAPK	0.568952	None	0.682377353	3936
GBM	LCP1	RTK	0.568952	None	-0.511356272	3936
GBM	LCP1	TSCmTOR	0.568952	None	0.448796553	3936
GBM	MMP1	Apoptosis	0.986034	None	0.005166358	4312
GBM	MMP1	CellCycle	0.986034	None	0.045365262	4312
GBM	MMP1	DNADamage	0.158655	None	-0.475800047	4312
GBM	MMP1	EMT	0.158655	None	0.371195356	4312
GBM	MMP1	Hormone AR	0.429231	None	-0.209545329	4312
GBM	MMP1	Hormone ER	0.158655	None	-0.408929105	4312
GBM	MMP1	PI3KAKT	0.986034	None	0.126027887	4312
GBM	MMP1	RASMAPK	0.954735	None	0.298371246	4312
GBM	MMP1	RTK	0.986034	None	-0.068885856	4312
GBM	MMP1	TSCmTOR	0.158655	None	0.960962208	4312
GBM	MMP10	Apoptosis	0.793298	None	0.171257996	4319
GBM	MMP10	CellCycle	0.793298	None	-0.258370354	4319
GBM	MMP10	DNADamage	0.829782	None	-0.109590076	4319
GBM	MMP10	EMT	0.0292693	Activation	0.575700275	4319
GBM	MMP10	Hormone AR	0.624642	None	-0.170682628	4319
GBM	MMP10	Hormone ER	0.395854	None	-0.301031301	4319
GBM	MMP10	PI3KAKT	0.395854	None	-0.787902256	4319
GBM	MMP10	RASMAPK	0.896045	None	-0.067859117	4319
GBM	MMP10	RTK	0.395854	None	-0.727592554	4319
GBM	MMP10	TSCmTOR	0.896045	None	-0.104856486	4319
GBM	MMP12	Apoptosis	0.52902	None	0.328559453	4321
GBM	MMP12	CellCycle	0.259281	None	0.824325387	4321
GBM	MMP12	DNADamage	0.52902	None	0.227060902	4321
GBM	MMP12	EMT	0.813865	None	0.047107781	4321
GBM	MMP12	Hormone AR	0.52902	None	-0.166533281	4321
GBM	MMP12	Hormone ER	0.357505	None	-0.353397324	4321
GBM	MMP12	PI3KAKT	0.52902	None	0.608964045	4321
GBM	MMP12	RASMAPK	0.754828	None	-0.26156038	4321
GBM	MMP12	RTK	0.754828	None	0.194779177	4321
GBM	MMP12	TSCmTOR	0.52902	None	0.633436945	4321
GBM	MMP13	Apoptosis	0.845421	None	0.059039303	4322
GBM	MMP13	CellCycle	0.0118858	Activation	1.216380897	4322
GBM	MMP13	DNADamage	0.240275	None	0.392696723	4322
GBM	MMP13	EMT	0.240275	None	0.280773109	4322
GBM	MMP13	Hormone AR	0.171945	None	-0.290798991	4322
GBM	MMP13	Hormone ER	0.0688652	None	-0.503141775	4322
GBM	MMP13	PI3KAKT	0.576791	None	0.381355033	4322
GBM	MMP13	RASMAPK	0.499057	None	-0.458948706	4322
GBM	MMP13	RTK	0.164601	None	-0.823452794	4322
GBM	MMP13	TSCmTOR	0.153561	None	0.939969849	4322
GBM	MMP14	Apoptosis	0.487215	None	0.327615782	4323
GBM	MMP14	CellCycle	0.943363	None	0.026377553	4323
GBM	MMP14	DNADamage	0.487215	None	-0.313377189	4323
GBM	MMP14	EMT	0.0724309	None	0.520508408	4323
GBM	MMP14	Hormone AR	0.642339	None	-0.132136212	4323
GBM	MMP14	Hormone ER	0.487097	None	-0.319856772	4323
GBM	MMP14	PI3KAKT	0.784679	None	-0.211251199	4323
GBM	MMP14	RASMAPK	0.487215	None	0.549105794	4323
GBM	MMP14	RTK	0.487215	None	0.500751713	4323
GBM	MMP14	TSCmTOR	0.677769	None	0.288971608	4323
GBM	MMP2	Apoptosis	0.710811	None	0.132043521	4313
GBM	MMP2	CellCycle	0.710811	None	0.172118228	4313
GBM	MMP2	DNADamage	0.710811	None	-0.22088262	4313
GBM	MMP2	EMT	0.710811	None	0.250910825	4313
GBM	MMP2	Hormone AR	0.710811	None	-0.173132906	4313
GBM	MMP2	Hormone ER	0.710811	None	0.132565257	4313
GBM	MMP2	PI3KAKT	0.710811	None	-0.66663707	4313
GBM	MMP2	RASMAPK	0.521454	None	-0.991518181	4313
GBM	MMP2	RTK	0.710811	None	0.367382445	4313
GBM	MMP2	TSCmTOR	0.710811	None	-0.171340159	4313
GBM	MMP3	Apoptosis	0.942626	None	-0.055849835	4314
GBM	MMP3	CellCycle	0.942626	None	0.080294439	4314
GBM	MMP3	DNADamage	0.889119	None	0.226769686	4314
GBM	MMP3	EMT	0.942626	None	0.081144446	4314
GBM	MMP3	Hormone AR	0.942626	None	0.085928744	4314
GBM	MMP3	Hormone ER	0.889119	None	-0.167313714	4314
GBM	MMP3	PI3KAKT	0.989304	None	-0.007438163	4314
GBM	MMP3	RASMAPK	0.889119	None	0.3950232	4314
GBM	MMP3	RTK	0.889119	None	-0.397254217	4314
GBM	MMP3	TSCmTOR	0.889119	None	0.487752427	4314
GBM	MMP9	Apoptosis	0.504708	None	0.219061008	4318
GBM	MMP9	CellCycle	0.504708	None	0.291595366	4318
GBM	MMP9	DNADamage	0.337775	None	-0.341380261	4318
GBM	MMP9	EMT	0.0561148	None	0.493805715	4318
GBM	MMP9	Hormone AR	0.0561148	None	-0.389265772	4318
GBM	MMP9	Hormone ER	0.210088	None	-0.334265893	4318
GBM	MMP9	PI3KAKT	0.45287	None	0.56397295	4318
GBM	MMP9	RASMAPK	0.378408	None	0.616847415	4318
GBM	MMP9	RTK	0.973447	None	-0.015853711	4318
GBM	MMP9	TSCmTOR	0.0561148	None	1.142532651	4318
GBM	PECAM1	Apoptosis	0.535102	None	0.287457682	5175
GBM	PECAM1	CellCycle	0.781157	None	-0.224246764	5175
GBM	PECAM1	DNADamage	0.275449	None	-0.449617666	5175
GBM	PECAM1	EMT	0.252506	None	0.435554071	5175
GBM	PECAM1	Hormone AR	0.837862	None	0.034476203	5175
GBM	PECAM1	Hormone ER	0.837862	None	-0.05804735	5175
GBM	PECAM1	PI3KAKT	0.41239	None	-0.75937881	5175
GBM	PECAM1	RASMAPK	0.275449	None	0.887892911	5175
GBM	PECAM1	RTK	0.837862	None	0.125393943	5175
GBM	PECAM1	TSCmTOR	0.535102	None	-0.465940692	5175
GBM	SERPINE1	Apoptosis	0.993136	None	0.039192208	5054
GBM	SERPINE1	CellCycle	0.993136	None	0.003222768	5054
GBM	SERPINE1	DNADamage	0.0704685	None	-0.570562658	5054
GBM	SERPINE1	EMT	0.000502242	Activation	0.767381832	5054
GBM	SERPINE1	Hormone AR	0.0704685	None	-0.381464167	5054
GBM	SERPINE1	Hormone ER	0.203695	None	-0.340150338	5054
GBM	SERPINE1	PI3KAKT	0.610253	None	0.569003562	5054
GBM	SERPINE1	RASMAPK	0.993136	None	0.157502022	5054
GBM	SERPINE1	RTK	0.732849	None	-0.364946257	5054
GBM	SERPINE1	TSCmTOR	0.993136	None	-0.056139801	5054
GBM	SPP1	Apoptosis	0.368728	None	-0.304099516	6696
GBM	SPP1	CellCycle	0.317456	None	-0.508354272	6696
GBM	SPP1	DNADamage	0.368728	None	-0.283312887	6696
GBM	SPP1	EMT	0.680729	None	0.081937203	6696
GBM	SPP1	Hormone AR	0.255224	None	-0.275558967	6696
GBM	SPP1	Hormone ER	0.655736	None	-0.106489398	6696
GBM	SPP1	PI3KAKT	0.244604	None	0.980905886	6696
GBM	SPP1	RASMAPK	0.244604	None	1.117919643	6696
GBM	SPP1	RTK	0.317456	None	-0.610564392	6696
GBM	SPP1	TSCmTOR	0.244604	None	0.872783337	6696
GBM	TIMP2	Apoptosis	0.537296	None	0.323133906	7077
GBM	TIMP2	CellCycle	0.681873	None	-0.224839158	7077
GBM	TIMP2	DNADamage	0.575579	None	-0.232336988	7077
GBM	TIMP2	EMT	0.681873	None	0.144286705	7077
GBM	TIMP2	Hormone AR	0.469043	None	-0.275110161	7077
GBM	TIMP2	Hormone ER	0.486943	None	0.29347437	7077
GBM	TIMP2	PI3KAKT	0.486943	None	-0.745686979	7077
GBM	TIMP2	RASMAPK	0.681873	None	-0.268757665	7077
GBM	TIMP2	RTK	0.190088	None	-1.058132123	7077
GBM	TIMP2	TSCmTOR	0.789205	None	0.123392501	7077
GBM	TNF	Apoptosis	0.401728	None	-0.373654337	7124
GBM	TNF	CellCycle	0.0602347	None	-0.832426828	7124
GBM	TNF	DNADamage	0.0335945	Inhibition	-0.670862304	7124
GBM	TNF	EMT	0.707471	None	0.136152636	7124
GBM	TNF	Hormone AR	0.834721	None	0.042376862	7124
GBM	TNF	Hormone ER	0.834721	None	0.082403362	7124
GBM	TNF	PI3KAKT	0.707471	None	0.427288444	7124
GBM	TNF	RASMAPK	0.00191766	Activation	1.848069975	7124
GBM	TNF	RTK	0.834721	None	-0.098627867	7124
GBM	TNF	TSCmTOR	0.0335945	Activation	1.162930606	7124
GBM	TNFRSF11B	Apoptosis	0.472293	None	-0.287775387	4982
GBM	TNFRSF11B	CellCycle	0.472293	None	-0.50834173	4982
GBM	TNFRSF11B	DNADamage	0.472293	None	-0.231062929	4982
GBM	TNFRSF11B	EMT	0.0631252	None	0.551798615	4982
GBM	TNFRSF11B	Hormone AR	0.472293	None	-0.171437584	4982
GBM	TNFRSF11B	Hormone ER	0.472293	None	-0.31597933	4982
GBM	TNFRSF11B	PI3KAKT	0.472293	None	-0.595041195	4982
GBM	TNFRSF11B	RASMAPK	0.472293	None	0.541725185	4982
GBM	TNFRSF11B	RTK	0.67035	None	0.19553447	4982
GBM	TNFRSF11B	TSCmTOR	0.662202	None	-0.251076847	4982
HNSC	FGF2	Apoptosis	0.710187	None	-0.112104154	2247
HNSC	FGF2	CellCycle	0.927723	None	-0.014606899	2247
HNSC	FGF2	DNADamage	0.000474218	Activation	0.650618181	2247
HNSC	FGF2	EMT	0.120242	None	0.554308496	2247
HNSC	FGF2	Hormone AR	7.9687e-05	Activation	0.694950055	2247
HNSC	FGF2	Hormone ER	0.212376	None	0.104012476	2247
HNSC	FGF2	PI3KAKT	0.877705	None	-0.076846437	2247
HNSC	FGF2	RASMAPK	0.00567585	Inhibition	-0.517571958	2247
HNSC	FGF2	RTK	0.000130371	Inhibition	-1.032014173	2247
HNSC	FGF2	TSCmTOR	0.00182492	Inhibition	-0.637262199	2247
HNSC	ICAM1	Apoptosis	0.00140186	Activation	0.73977974	3383
HNSC	ICAM1	CellCycle	0.514566	None	-0.118816164	3383
HNSC	ICAM1	DNADamage	0.77393	None	-0.049764597	3383
HNSC	ICAM1	EMT	0.0324538	Activation	0.828722744	3383
HNSC	ICAM1	Hormone AR	0.162281	None	0.311065559	3383
HNSC	ICAM1	Hormone ER	0.200448	None	0.12256462	3383
HNSC	ICAM1	PI3KAKT	0.245264	None	-0.371803241	3383
HNSC	ICAM1	RASMAPK	0.236576	None	-0.242998551	3383
HNSC	ICAM1	RTK	0.200448	None	-0.388669335	3383
HNSC	ICAM1	TSCmTOR	0.200448	None	-0.30473557	3383
HNSC	ICAM3	Apoptosis	0.0770078	None	0.478841143	3385
HNSC	ICAM3	CellCycle	0.676442	None	-0.115204333	3385
HNSC	ICAM3	DNADamage	0.140112	None	0.349634471	3385
HNSC	ICAM3	EMT	0.905501	None	-0.037190971	3385
HNSC	ICAM3	Hormone AR	0.0302845	Activation	0.465197963	3385
HNSC	ICAM3	Hormone ER	0.169181	None	0.12493472	3385
HNSC	ICAM3	PI3KAKT	0.802134	None	0.134850592	3385
HNSC	ICAM3	RASMAPK	0.445843	None	-0.191233787	3385
HNSC	ICAM3	RTK	0.167958	None	-0.45346129	3385
HNSC	ICAM3	TSCmTOR	0.905501	None	-0.028623222	3385
HNSC	ITGA2	Apoptosis	0.878776	None	-0.098428073	3673
HNSC	ITGA2	CellCycle	0.900538	None	0.038755288	3673
HNSC	ITGA2	DNADamage	0.58331	None	-0.227734291	3673
HNSC	ITGA2	EMT	0.900538	None	-0.038467126	3673
HNSC	ITGA2	Hormone AR	0.58331	None	-0.219164197	3673
HNSC	ITGA2	Hormone ER	0.58331	None	-0.0760363	3673
HNSC	ITGA2	PI3KAKT	0.58331	None	-0.309560225	3673
HNSC	ITGA2	RASMAPK	0.900538	None	-0.035661695	3673
HNSC	ITGA2	RTK	0.7251	None	0.194920201	3673
HNSC	ITGA2	TSCmTOR	0.58331	None	-0.218492567	3673
HNSC	LCP1	Apoptosis	0.262125	None	0.31715143	3936
HNSC	LCP1	CellCycle	0.615366	None	-0.107768596	3936
HNSC	LCP1	DNADamage	0.615366	None	0.108454961	3936
HNSC	LCP1	EMT	0.0158173	Activation	0.925168173	3936
HNSC	LCP1	Hormone AR	0.0374553	Activation	0.395602533	3936
HNSC	LCP1	Hormone ER	0.0158173	Activation	0.213109902	3936
HNSC	LCP1	PI3KAKT	0.663266	None	-0.125406192	3936
HNSC	LCP1	RASMAPK	0.615366	None	-0.104694955	3936
HNSC	LCP1	RTK	0.615366	None	-0.147193429	3936
HNSC	LCP1	TSCmTOR	0.545994	None	-0.20835485	3936
HNSC	MMP1	Apoptosis	0.37465	None	0.20265975	4312
HNSC	MMP1	CellCycle	0.0836201	None	-0.345650795	4312
HNSC	MMP1	DNADamage	0.0836201	None	-0.349340497	4312
HNSC	MMP1	EMT	3.35905e-08	Activation	1.773313802	4312
HNSC	MMP1	Hormone AR	0.0601879	None	-0.393132762	4312
HNSC	MMP1	Hormone ER	0.0836201	None	-0.148769377	4312
HNSC	MMP1	PI3KAKT	0.37465	None	-0.308611121	4312
HNSC	MMP1	RASMAPK	0.616836	None	0.103069064	4312
HNSC	MMP1	RTK	0.774412	None	0.071590548	4312
HNSC	MMP1	TSCmTOR	0.128429	None	0.335840078	4312
HNSC	MMP10	Apoptosis	0.672649	None	-0.140994306	4319
HNSC	MMP10	CellCycle	0.0286518	Inhibition	-0.420315041	4319
HNSC	MMP10	DNADamage	0.248506	None	-0.264735131	4319
HNSC	MMP10	EMT	3.40085e-06	Activation	1.543314269	4319
HNSC	MMP10	Hormone AR	0.248506	None	-0.241993409	4319
HNSC	MMP10	Hormone ER	0.0104132	Inhibition	-0.220571222	4319
HNSC	MMP10	PI3KAKT	0.504972	None	-0.296225309	4319
HNSC	MMP10	RASMAPK	0.748292	None	-0.075015965	4319
HNSC	MMP10	RTK	0.933599	None	0.02075137	4319
HNSC	MMP10	TSCmTOR	0.748292	None	0.080366918	4319
HNSC	MMP12	Apoptosis	0.0618494	None	0.533198167	4321
HNSC	MMP12	CellCycle	0.100163	None	-0.373206552	4321
HNSC	MMP12	DNADamage	0.398387	None	0.171490126	4321
HNSC	MMP12	EMT	0.151155	None	0.57658173	4321
HNSC	MMP12	Hormone AR	0.282793	None	0.202475717	4321
HNSC	MMP12	Hormone ER	0.582805	None	0.039680746	4321
HNSC	MMP12	PI3KAKT	0.282793	None	-0.390116489	4321
HNSC	MMP12	RASMAPK	0.1487	None	-0.350018368	4321
HNSC	MMP12	RTK	0.216101	None	-0.400961941	4321
HNSC	MMP12	TSCmTOR	0.468266	None	-0.15290294	4321
HNSC	MMP13	Apoptosis	0.0204357	Inhibition	-0.502321583	4322
HNSC	MMP13	CellCycle	0.000600977	Inhibition	-0.611859114	4322
HNSC	MMP13	DNADamage	0.0594133	None	-0.360336783	4322
HNSC	MMP13	EMT	3.37412e-10	Activation	1.982318004	4322
HNSC	MMP13	Hormone AR	0.0204357	Inhibition	-0.417443754	4322
HNSC	MMP13	Hormone ER	0.0204357	Inhibition	-0.186920536	4322
HNSC	MMP13	PI3KAKT	0.484322	None	0.244006848	4322
HNSC	MMP13	RASMAPK	0.484322	None	0.135961373	4322
HNSC	MMP13	RTK	0.949582	None	-0.015764811	4322
HNSC	MMP13	TSCmTOR	0.484322	None	0.175654371	4322
HNSC	MMP14	Apoptosis	0.653385	None	-0.145557882	4323
HNSC	MMP14	CellCycle	0.000214386	Inhibition	-0.651552744	4323
HNSC	MMP14	DNADamage	0.729385	None	0.059558139	4323
HNSC	MMP14	EMT	9.56386e-09	Activation	1.833905573	4323
HNSC	MMP14	Hormone AR	0.729385	None	0.081193309	4323
HNSC	MMP14	Hormone ER	0.729385	None	-0.027726907	4323
HNSC	MMP14	PI3KAKT	0.458311	None	-0.313842927	4323
HNSC	MMP14	RASMAPK	0.232914	None	-0.292615033	4323
HNSC	MMP14	RTK	0.288035	None	-0.364391749	4323
HNSC	MMP14	TSCmTOR	0.205747	None	-0.354696107	4323
HNSC	MMP2	Apoptosis	0.00914364	Inhibition	-0.583760131	4313
HNSC	MMP2	CellCycle	5.19932e-06	Inhibition	-0.793304568	4313
HNSC	MMP2	DNADamage	0.249185	None	0.28304098	4313
HNSC	MMP2	EMT	5.19932e-06	Activation	1.480675322	4313
HNSC	MMP2	Hormone AR	0.872216	None	0.055599377	4313
HNSC	MMP2	Hormone ER	0.47442	None	-0.085313319	4313
HNSC	MMP2	PI3KAKT	0.517276	None	0.290855444	4313
HNSC	MMP2	RASMAPK	0.872216	None	-0.038452741	4313
HNSC	MMP2	RTK	0.872216	None	0.089630628	4313
HNSC	MMP2	TSCmTOR	0.872216	None	-0.030630684	4313
HNSC	MMP3	Apoptosis	0.820488	None	0.044464903	4314
HNSC	MMP3	CellCycle	0.144178	None	-0.297159388	4314
HNSC	MMP3	DNADamage	0.0515616	None	-0.438957844	4314
HNSC	MMP3	EMT	1.38823e-06	Activation	1.589243592	4314
HNSC	MMP3	Hormone AR	0.12098	None	-0.328366944	4314
HNSC	MMP3	Hormone ER	0.144178	None	-0.123376933	4314
HNSC	MMP3	PI3KAKT	0.520661	None	-0.208539187	4314
HNSC	MMP3	RASMAPK	0.144178	None	0.308639575	4314
HNSC	MMP3	RTK	0.252766	None	0.31818466	4314
HNSC	MMP3	TSCmTOR	0.148055	None	0.309275197	4314
HNSC	MMP9	Apoptosis	0.655336	None	0.087392476	4318
HNSC	MMP9	CellCycle	0.000576575	Inhibition	-0.614280716	4318
HNSC	MMP9	DNADamage	0.086186	None	0.362509267	4318
HNSC	MMP9	EMT	6.87303e-06	Activation	1.501455135	4318
HNSC	MMP9	Hormone AR	0.655336	None	0.084242337	4318
HNSC	MMP9	Hormone ER	0.350282	None	0.083782296	4318
HNSC	MMP9	PI3KAKT	0.20298	None	-0.444420951	4318
HNSC	MMP9	RASMAPK	0.361718	None	-0.184868509	4318
HNSC	MMP9	RTK	0.086186	None	-0.543350286	4318
HNSC	MMP9	TSCmTOR	0.160307	None	-0.332363962	4318
HNSC	PECAM1	Apoptosis	0.299843	None	0.215886236	5175
HNSC	PECAM1	CellCycle	0.00890839	Inhibition	-0.454638594	5175
HNSC	PECAM1	DNADamage	0.00562564	Activation	0.522413117	5175
HNSC	PECAM1	EMT	0.00174306	Activation	1.143165287	5175
HNSC	PECAM1	Hormone AR	0.00562564	Activation	0.477258675	5175
HNSC	PECAM1	Hormone ER	0.436635	None	0.05605093	5175
HNSC	PECAM1	PI3KAKT	0.229723	None	-0.382358884	5175
HNSC	PECAM1	RASMAPK	0.130237	None	-0.294164131	5175
HNSC	PECAM1	RTK	0.00562564	Inhibition	-0.762213865	5175
HNSC	PECAM1	TSCmTOR	0.0769719	None	-0.378114136	5175
HNSC	SERPINE1	Apoptosis	0.994525	None	0.00134824	5054
HNSC	SERPINE1	CellCycle	0.0179601	Inhibition	-0.470469005	5054
HNSC	SERPINE1	DNADamage	0.0259447	Inhibition	-0.449386771	5054
HNSC	SERPINE1	EMT	3.32163e-09	Activation	1.893187164	5054
HNSC	SERPINE1	Hormone AR	0.0400653	Inhibition	-0.37430617	5054
HNSC	SERPINE1	Hormone ER	0.0259447	Inhibition	-0.183273169	5054
HNSC	SERPINE1	PI3KAKT	0.334846	None	-0.340431292	5054
HNSC	SERPINE1	RASMAPK	0.938366	None	-0.051692466	5054
HNSC	SERPINE1	RTK	0.0678098	None	0.504703488	5054
HNSC	SERPINE1	TSCmTOR	0.938366	None	0.037238092	5054
HNSC	SPP1	Apoptosis	0.353979	None	-0.227010372	6696
HNSC	SPP1	CellCycle	0.142489	None	-0.277035731	6696
HNSC	SPP1	DNADamage	0.0724386	None	0.417520683	6696
HNSC	SPP1	EMT	0.836905	None	0.063911935	6696
HNSC	SPP1	Hormone AR	0.13755	None	0.286568449	6696
HNSC	SPP1	Hormone ER	0.0932068	None	0.149735715	6696
HNSC	SPP1	PI3KAKT	0.669431	None	-0.150094899	6696
HNSC	SPP1	RASMAPK	0.0932068	None	-0.368104517	6696
HNSC	SPP1	RTK	0.527839	None	-0.201274907	6696
HNSC	SPP1	TSCmTOR	0.0554069	None	-0.527702229	6696
HNSC	TIMP2	Apoptosis	0.00800091	Inhibition	-0.560530636	7077
HNSC	TIMP2	CellCycle	0.0005187	Inhibition	-0.617877244	7077
HNSC	TIMP2	DNADamage	0.0154716	Activation	0.445316628	7077
HNSC	TIMP2	EMT	0.0005187	Activation	1.221488562	7077
HNSC	TIMP2	Hormone AR	0.0960725	None	0.277486179	7077
HNSC	TIMP2	Hormone ER	0.530725	None	-0.045240912	7077
HNSC	TIMP2	PI3KAKT	0.455453	None	-0.237170709	7077
HNSC	TIMP2	RASMAPK	0.00756446	Inhibition	-0.515260984	7077
HNSC	TIMP2	RTK	0.0283384	Inhibition	-0.5791761	7077
HNSC	TIMP2	TSCmTOR	0.00163122	Inhibition	-0.658252594	7077
HNSC	TNF	Apoptosis	0.744221	None	0.108438633	7124
HNSC	TNF	CellCycle	0.387149	None	-0.228084307	7124
HNSC	TNF	DNADamage	0.494964	None	-0.19819542	7124
HNSC	TNF	EMT	0.188623	None	0.640709756	7124
HNSC	TNF	Hormone AR	0.713355	None	0.123813684	7124
HNSC	TNF	Hormone ER	0.786478	None	-0.019661202	7124
HNSC	TNF	PI3KAKT	0.744221	None	-0.151111248	7124
HNSC	TNF	RASMAPK	0.387149	None	0.247820121	7124
HNSC	TNF	RTK	0.771935	None	0.097766726	7124
HNSC	TNF	TSCmTOR	0.0296421	Activation	0.561490856	7124
HNSC	TNFRSF11B	Apoptosis	0.0653459	None	-0.532179849	4982
HNSC	TNFRSF11B	CellCycle	0.900816	None	-0.09346026	4982
HNSC	TNFRSF11B	DNADamage	0.942998	None	0.012456867	4982
HNSC	TNFRSF11B	EMT	0.942998	None	-0.030989203	4982
HNSC	TNFRSF11B	Hormone AR	0.900816	None	0.06659635	4982
HNSC	TNFRSF11B	Hormone ER	0.900816	None	0.026184623	4982
HNSC	TNFRSF11B	PI3KAKT	0.616133	None	0.321470191	4982
HNSC	TNFRSF11B	RASMAPK	0.616133	None	0.1787444	4982
HNSC	TNFRSF11B	RTK	0.616133	None	0.33841943	4982
HNSC	TNFRSF11B	TSCmTOR	0.616133	None	-0.195516969	4982
KICH	FGF2	Apoptosis	0.206772	None	-0.29970733	2247
KICH	FGF2	CellCycle	0.223292	None	-0.363393749	2247
KICH	FGF2	DNADamage	0.0609605	None	0.914305996	2247
KICH	FGF2	EMT	0.364058	None	0.380187159	2247
KICH	FGF2	Hormone AR	0.241416	None	-0.217492348	2247
KICH	FGF2	Hormone ER	0.568078	None	0.123443137	2247
KICH	FGF2	PI3KAKT	0.0791691	None	0.57888218	2247
KICH	FGF2	RASMAPK	0.0433137	Activation	1.042209514	2247
KICH	FGF2	RTK	0.0791691	None	0.702712615	2247
KICH	FGF2	TSCmTOR	0.0433137	Activation	0.716333618	2247
KICH	ICAM1	Apoptosis	0.77039	None	-0.105564638	3383
KICH	ICAM1	CellCycle	0.506961	None	-0.266026913	3383
KICH	ICAM1	DNADamage	0.77039	None	0.171357959	3383
KICH	ICAM1	EMT	0.506961	None	0.471503082	3383
KICH	ICAM1	Hormone AR	0.345152	None	-0.348031046	3383
KICH	ICAM1	Hormone ER	0.506961	None	-0.226888901	3383
KICH	ICAM1	PI3KAKT	0.506961	None	0.304664291	3383
KICH	ICAM1	RASMAPK	0.506961	None	0.393879451	3383
KICH	ICAM1	RTK	0.969068	None	-0.013498718	3383
KICH	ICAM1	TSCmTOR	0.77039	None	0.110378591	3383
KICH	ICAM3	Apoptosis	0.574022	None	0.138489604	3385
KICH	ICAM3	CellCycle	0.574022	None	0.186120482	3385
KICH	ICAM3	DNADamage	0.521936	None	-0.45947352	3385
KICH	ICAM3	EMT	0.574022	None	-0.25417485	3385
KICH	ICAM3	Hormone AR	0.741021	None	-0.055092798	3385
KICH	ICAM3	Hormone ER	0.407735	None	0.358287353	3385
KICH	ICAM3	PI3KAKT	0.521936	None	0.31217334	3385
KICH	ICAM3	RASMAPK	0.407735	None	-0.619867475	3385
KICH	ICAM3	RTK	0.407735	None	-0.532342642	3385
KICH	ICAM3	TSCmTOR	0.574022	None	-0.212400213	3385
KICH	ITGA2	Apoptosis	0.0559853	None	-0.419220304	3673
KICH	ITGA2	CellCycle	0.0285882	Inhibition	-0.679207822	3673
KICH	ITGA2	DNADamage	0.0595976	None	0.803620121	3673
KICH	ITGA2	EMT	0.398142	None	-0.400729646	3673
KICH	ITGA2	Hormone AR	0.909664	None	-0.018653546	3673
KICH	ITGA2	Hormone ER	0.505097	None	0.163572587	3673
KICH	ITGA2	PI3KAKT	0.398142	None	0.278927727	3673
KICH	ITGA2	RASMAPK	0.0285882	Activation	0.988073369	3673
KICH	ITGA2	RTK	0.00101518	Activation	1.270863278	3673
KICH	ITGA2	TSCmTOR	0.0559853	None	0.630228485	3673
KICH	LCP1	Apoptosis	0.82981	None	-0.042216026	3936
KICH	LCP1	CellCycle	0.718624	None	-0.124935369	3936
KICH	LCP1	DNADamage	0.718624	None	0.22300722	3936
KICH	LCP1	EMT	0.560159	None	0.527151748	3936
KICH	LCP1	Hormone AR	0.374831	None	-0.294042982	3936
KICH	LCP1	Hormone ER	0.718624	None	-0.142278803	3936
KICH	LCP1	PI3KAKT	0.374831	None	0.500991879	3936
KICH	LCP1	RASMAPK	0.560159	None	0.465254651	3936
KICH	LCP1	RTK	0.718624	None	0.159166658	3936
KICH	LCP1	TSCmTOR	0.718624	None	0.178958651	3936
KICH	MMP1	Apoptosis	0.946491	None	-0.244900441	4312
KICH	MMP1	CellCycle	0.946491	None	0.017447911	4312
KICH	MMP1	DNADamage	0.946491	None	0.140002494	4312
KICH	MMP1	EMT	0.946491	None	0.324353425	4312
KICH	MMP1	Hormone AR	0.946491	None	0.029993738	4312
KICH	MMP1	Hormone ER	0.946491	None	-0.141280533	4312
KICH	MMP1	PI3KAKT	0.946491	None	-0.159580648	4312
KICH	MMP1	RASMAPK	0.946491	None	-0.073781269	4312
KICH	MMP1	RTK	0.946491	None	-0.073271158	4312
KICH	MMP1	TSCmTOR	0.946491	None	0.262055922	4312
KICH	MMP10	Apoptosis	0.696657	None	-0.204679311	4319
KICH	MMP10	CellCycle	0.780359	None	0.186351778	4319
KICH	MMP10	DNADamage	0.936167	None	0.126034816	4319
KICH	MMP10	EMT	0.696657	None	0.367345816	4319
KICH	MMP10	Hormone AR	0.936167	None	0.061666321	4319
KICH	MMP10	Hormone ER	0.460037	None	-0.426757986	4319
KICH	MMP10	PI3KAKT	0.977996	None	0.019415897	4319
KICH	MMP10	RASMAPK	0.696657	None	0.387209886	4319
KICH	MMP10	RTK	0.977996	None	0.009591311	4319
KICH	MMP10	TSCmTOR	0.587776	None	0.43342163	4319
KICH	MMP12	Apoptosis	0.966583	None	-0.17405693	4321
KICH	MMP12	CellCycle	0.966583	None	-0.016777	4321
KICH	MMP12	DNADamage	0.966583	None	0.158551242	4321
KICH	MMP12	EMT	0.966583	None	0.1549409	4321
KICH	MMP12	Hormone AR	0.966583	None	0.030673669	4321
KICH	MMP12	Hormone ER	0.167169	None	-0.514996609	4321
KICH	MMP12	PI3KAKT	0.966583	None	-0.216832703	4321
KICH	MMP12	RASMAPK	0.966583	None	0.089157656	4321
KICH	MMP12	RTK	0.966583	None	-0.315781374	4321
KICH	MMP12	TSCmTOR	0.966583	None	0.011715356	4321
KICH	MMP13	Apoptosis	0.365886	None	-0.406244343	4322
KICH	MMP13	CellCycle	0.72056	None	-0.167325977	4322
KICH	MMP13	DNADamage	0.682571	None	0.451526678	4322
KICH	MMP13	EMT	0.682571	None	0.442843228	4322
KICH	MMP13	Hormone AR	0.72056	None	-0.075539965	4322
KICH	MMP13	Hormone ER	0.682571	None	-0.29315275	4322
KICH	MMP13	PI3KAKT	0.72056	None	0.136495329	4322
KICH	MMP13	RASMAPK	0.72056	None	0.277525699	4322
KICH	MMP13	RTK	0.920264	None	-0.035245886	4322
KICH	MMP13	TSCmTOR	0.689198	None	0.260594104	4322
KICH	MMP14	Apoptosis	0.819278	None	0.337774674	4323
KICH	MMP14	CellCycle	0.907181	None	0.240456944	4323
KICH	MMP14	DNADamage	0.907181	None	0.048991146	4323
KICH	MMP14	EMT	0.907181	None	0.231797922	4323
KICH	MMP14	Hormone AR	0.907181	None	-0.202093154	4323
KICH	MMP14	Hormone ER	0.907181	None	0.140975973	4323
KICH	MMP14	PI3KAKT	0.907181	None	-0.032474974	4323
KICH	MMP14	RASMAPK	0.907181	None	0.113965824	4323
KICH	MMP14	RTK	0.907181	None	-0.081316254	4323
KICH	MMP14	TSCmTOR	0.907181	None	0.062414873	4323
KICH	MMP2	Apoptosis	0.929833	None	0.056061623	4313
KICH	MMP2	CellCycle	0.929833	None	0.077463153	4313
KICH	MMP2	DNADamage	0.929833	None	0.212017027	4313
KICH	MMP2	EMT	0.53005	None	0.756840464	4313
KICH	MMP2	Hormone AR	0.929833	None	-0.16487634	4313
KICH	MMP2	Hormone ER	0.929833	None	-0.045117223	4313
KICH	MMP2	PI3KAKT	0.929833	None	-0.072353381	4313
KICH	MMP2	RASMAPK	0.929833	None	0.292588127	4313
KICH	MMP2	RTK	0.931438	None	0.030077949	4313
KICH	MMP2	TSCmTOR	0.929833	None	0.338167702	4313
KICH	MMP9	Apoptosis	0.947963	None	0.029683211	4318
KICH	MMP9	CellCycle	0.947963	None	0.016999564	4318
KICH	MMP9	DNADamage	0.947963	None	0.128713347	4318
KICH	MMP9	EMT	0.888064	None	0.299071387	4318
KICH	MMP9	Hormone AR	0.824063	None	0.170479334	4318
KICH	MMP9	Hormone ER	0.00112705	Inhibition	-0.791089958	4318
KICH	MMP9	PI3KAKT	0.824063	None	-0.295417669	4318
KICH	MMP9	RASMAPK	0.947963	None	-0.128148417	4318
KICH	MMP9	RTK	0.824063	None	-0.339137025	4318
KICH	MMP9	TSCmTOR	0.947963	None	0.053671946	4318
KICH	PECAM1	Apoptosis	0.120529	None	-0.454760041	5175
KICH	PECAM1	CellCycle	0.120529	None	-0.57863705	5175
KICH	PECAM1	DNADamage	0.360647	None	0.524066428	5175
KICH	PECAM1	EMT	0.427164	None	-0.372400554	5175
KICH	PECAM1	Hormone AR	0.360647	None	-0.189381905	5175
KICH	PECAM1	Hormone ER	0.867379	None	-0.036452115	5175
KICH	PECAM1	PI3KAKT	0.360647	None	0.345273868	5175
KICH	PECAM1	RASMAPK	0.360647	None	0.500556376	5175
KICH	PECAM1	RTK	0.43689	None	0.298276188	5175
KICH	PECAM1	TSCmTOR	0.360647	None	0.366186093	5175
KICH	SERPINE1	Apoptosis	0.774768	None	0.199416989	5054
KICH	SERPINE1	CellCycle	0.746892	None	0.316132077	5054
KICH	SERPINE1	DNADamage	0.903435	None	0.140179892	5054
KICH	SERPINE1	EMT	0.392444	None	0.808646199	5054
KICH	SERPINE1	Hormone AR	0.903435	None	-0.111474288	5054
KICH	SERPINE1	Hormone ER	0.725341	None	-0.315570456	5054
KICH	SERPINE1	PI3KAKT	0.966429	None	0.029650219	5054
KICH	SERPINE1	RASMAPK	0.966429	None	0.016327161	5054
[truncated: 3,842 more rows]
