# Supplementary material for: Pan-cancer analyses of senescence-related genes in extracellular matrix characterization in cancer
Source: Discov Oncol. 2023 Nov 20;14:208. doi: 10.1007/s12672-023-00828-7 (PMC10660488; doi:10.1007/s12672-023-00828-7)
Supplement: Supplementary file 27 — Supplementary file27 (XLSX 202 KB) [file 12672_2023_828_MOESM27_ESM.xlsx]

## Sheet: SheetName
Table S22 The detailed information about the correlation between gene expression and GDSC drug sensitivity in pan-cancer
symbol	drug	cor	fdr	entrez
FGF2	(5Z)-7-Oxozeaenol	-0.0823277	0.0357681	2247
FGF2	17-AAG	-0.229258	1.1552e-10	2247
FGF2	5-Fluorouracil	0.182303	1.86377e-07	2247
FGF2	681640	-0.083474	0.136385	2247
FGF2	A-443654	0.0242231	0.91775	2247
FGF2	A-770041	-0.0844308	0.273708	2247
FGF2	AC220	0.0728897	0.0964097	2247
FGF2	AG-014699	-0.120659	0.0025325	2247
FGF2	AICAR	0.177267	2.10369e-06	2247
FGF2	AKT inhibitor VIII	-0.0741141	0.087883	2247
FGF2	AMG-706	-0.12359	0.00996214	2247
FGF2	AP-24534	0.00666857	0.896317	2247
FGF2	AR-42	0.226557	4.06175e-11	2247
FGF2	AS601245	-0.134066	0.0022548	2247
FGF2	AS605240	0.206706	1.83414e-08	2247
FGF2	AT-7519	0.28204	0	2247
FGF2	ATRA	0.0788296	0.0800748	2247
FGF2	AUY922	-0.105495	0.0176799	2247
FGF2	AZ628	0.0260548	0.768397	2247
FGF2	AZD6482	-0.13039	0.000807189	2247
FGF2	AZD7762	0.0194326	0.670208	2247
FGF2	AZD8055	0.0671596	0.0909658	2247
FGF2	Afatinib	0.0971591	0.00735184	2247
FGF2	Axitinib	-0.0464766	0.378586	2247
FGF2	BAY 61-3606	-0.00883146	0.855351	2247
FGF2	BEZ235	-0.18383	4.67274e-06	2247
FGF2	BHG712	0.183378	1.22947e-07	2247
FGF2	BI-2536	0.0434991	0.706461	2247
FGF2	BIRB 0796	-0.116461	0.011024	2247
FGF2	BIX02189	0.0999505	0.00559303	2247
FGF2	BMS-509744	-0.0733104	0.417239	2247
FGF2	BMS-536924	0.0819649	0.127628	2247
FGF2	BMS-708163	-0.060458	0.132455	2247
FGF2	BMS-754807	-5.1281e-06	0.99988	2247
FGF2	BMS345541	0.224891	5.08719e-11	2247
FGF2	BX-795	-0.0796191	0.0638938	2247
FGF2	BX-912	0.155737	6.85281e-06	2247
FGF2	Belinostat	0.191019	6.78603e-08	2247
FGF2	Bexarotene	-0.0468911	0.510198	2247
FGF2	Bicalutamide	-0.0883704	0.0343884	2247
FGF2	Bleomycin	-0.129538	0.00389535	2247
FGF2	Bleomycin (50 uM)	-0.314368	6.49711e-21	2247
FGF2	Bortezomib	-0.153463	0.0201087	2247
FGF2	Bosutinib	0.0183172	0.777171	2247
FGF2	Bryostatin 1	-0.0366888	0.501216	2247
FGF2	CAL-101	0.12777	0.000405572	2247
FGF2	CAY10603	0.171428	7.85378e-07	2247
FGF2	CCT007093	-0.0462179	0.298833	2247
FGF2	CCT018159	-0.0785764	0.092815	2247
FGF2	CEP-701	-0.011071	0.817363	2247
FGF2	CGP-082996	-0.000325564	0.998451	2247
FGF2	CGP-60474	-0.106824	0.1561	2247
FGF2	CH5424802	0.102802	0.0265357	2247
FGF2	CHIR-99021	-0.245731	9.25582e-13	2247
FGF2	CI-1040	0.040685	0.373815	2247
FGF2	CMK	-0.0301992	0.827845	2247
FGF2	CP466722	0.152132	1.2574e-05	2247
FGF2	CP724714	0.112006	0.00919369	2247
FGF2	CUDC-101	0.238087	6.37514e-12	2247
FGF2	CX-5461	0.133489	0.000175619	2247
FGF2	Camptothecin	-0.104257	0.00991421	2247
FGF2	Cetuximab	-0.00561632	0.905034	2247
FGF2	Cisplatin	-0.201846	6.07826e-07	2247
FGF2	Crizotinib	0.0647869	0.639953	2247
FGF2	Cyclopamine	-0.0325603	0.796707	2247
FGF2	Cytarabine	-0.180317	1.1279e-05	2247
FGF2	DMOG	-0.0681719	0.116841	2247
FGF2	Dabrafenib	-0.0253124	0.594664	2247
FGF2	Dasatinib	-0.210575	0.000398654	2247
FGF2	Docetaxel	-0.235783	5.39505e-11	2247
FGF2	Doxorubicin	-0.0568465	0.342298	2247
FGF2	EHT 1864	-0.00752093	0.938526	2247
FGF2	EKB-569	0.222601	4.78894e-10	2247
FGF2	EX-527	-0.0398802	0.708092	2247
FGF2	Elesclomol	-0.246654	1.0585e-10	2247
FGF2	Embelin	-0.0841666	0.0919954	2247
FGF2	Epothilone B	-0.10257	0.0243868	2247
FGF2	Erlotinib	-0.112817	0.107485	2247
FGF2	Etoposide	-0.0182317	0.74781	2247
FGF2	FH535	-0.0864369	0.0473847	2247
FGF2	FK866	0.0635375	0.0858035	2247
FGF2	FMK	0.0715267	0.231237	2247
FGF2	FR-180204	0.13774	0.001017	2247
FGF2	FTI-277	-0.213437	2.03885e-08	2247
FGF2	Foretinib	0.0052821	0.916473	2247
FGF2	GDC0449	0.0268988	0.814976	2247
FGF2	GDC0941	0.00126489	0.987364	2247
FGF2	GNF-2	0.0190495	0.947349	2247
FGF2	GSK-650394	-0.0657269	0.30357	2247
FGF2	GSK1070916	0.185373	1.20698e-07	2247
FGF2	GSK1904529A	-0.133422	0.00124999	2247
FGF2	GSK2126458	0.216779	5.05527e-10	2247
FGF2	GSK269962A	-0.164869	1.5978e-05	2247
FGF2	GSK429286A	0.00685429	0.89276	2247
FGF2	GSK690693	0.191209	4.094e-08	2247
FGF2	GW 441756	-0.0399021	0.834311	2247
FGF2	GW-2580	0.0240805	0.966771	2247
FGF2	GW843682X	0.0633897	0.479377	2247
FGF2	Gefitinib	0.0491693	0.243741	2247
FGF2	Gemcitabine	-0.061161	0.197439	2247
FGF2	Genentech Cpd 10	0.138678	9.0171e-05	2247
FGF2	HG-5-113-01	0.0333201	0.679715	2247
FGF2	HG-5-88-01	0.115791	0.225953	2247
FGF2	HG-6-64-1	-0.157754	6.6902e-05	2247
FGF2	I-BET-762	0.222332	4.93074e-11	2247
FGF2	IOX2	-0.0689334	0.196839	2247
FGF2	IPA-3	0.044089	0.281678	2247
FGF2	Imatinib	0.0209239	0.912071	2247
FGF2	Ispinesib Mesylate	0.174289	6.09106e-07	2247
FGF2	JNJ-26854165	-0.126557	0.00317898	2247
FGF2	JNK Inhibitor VIII	-0.158602	4.9299e-05	2247
FGF2	JNK-9L	-0.0411988	0.476785	2247
FGF2	JQ1	0.062195	0.137457	2247
FGF2	JQ12	0.00444169	0.950207	2247
FGF2	JW-7-24-1	0.149662	1.7511e-05	2247
FGF2	JW-7-52-1	-0.0746029	0.432062	2247
FGF2	KIN001-055	0.0816619	0.113756	2247
FGF2	KIN001-102	0.233578	6.44995e-12	2247
FGF2	KIN001-135	-0.0727289	0.462637	2247
FGF2	KIN001-236	0.148803	2.7807e-05	2247
FGF2	KIN001-244	0.127714	0.000351787	2247
FGF2	KIN001-260	0.142003	5.6667e-05	2247
FGF2	KIN001-266	0.110348	0.00995381	2247
FGF2	KIN001-270	0.0311164	0.461134	2247
FGF2	KU-55933	-0.00760394	0.932449	2247
FGF2	LAQ824	0.130456	0.000513606	2247
FGF2	LFM-A13	-0.158298	0.000300579	2247
FGF2	LY317615	0.107914	0.00696715	2247
FGF2	Lapatinib	-0.0826874	0.193261	2247
FGF2	Lenalidomide	0.0407706	0.591753	2247
FGF2	Linifanib	0.0506266	0.31311	2247
FGF2	Lisitinib	0.0608406	0.296309	2247
FGF2	MG-132	-0.103305	0.185893	2247
FGF2	MK-2206	0.0422368	0.422627	2247
FGF2	MLN4924	-0.145201	0.0032702	2247
FGF2	MP470	0.10495	0.0116378	2247
FGF2	MPS-1-IN-1	0.198695	1.88174e-08	2247
FGF2	MS-275	0.108708	0.142348	2247
FGF2	Masitinib	0.112803	0.00195561	2247
FGF2	Methotrexate	0.209142	3.94442e-09	2247
FGF2	Midostaurin	-0.25807	4.55493e-12	2247
FGF2	Mitomycin C	0.0155365	0.798759	2247
FGF2	NG-25	0.136151	0.000104023	2247
FGF2	NPK76-II-72-1	0.199158	4.67132e-09	2247
FGF2	NSC-207895	0.0416404	0.368998	2247
FGF2	NSC-87877	-0.0695605	0.185483	2247
FGF2	NU-7441	-0.0730466	0.236808	2247
FGF2	Navitoclax	0.222387	3.8161e-10	2247
FGF2	Nilotinib	0.0558988	0.261285	2247
FGF2	Nutlin-3a (-)	-0.101161	0.01794	2247
FGF2	OSI-027	0.173701	6.51462e-07	2247
FGF2	OSI-930	0.13955	0.000137039	2247
FGF2	OSU-03012	0.0111814	0.857262	2247
FGF2	Obatoclax Mesylate	0.00302185	0.962273	2247
FGF2	Olaparib	-0.141377	0.000349268	2247
FGF2	PAC-1	0.118429	0.0025382	2247
FGF2	PD-0325901	-0.0426269	0.309075	2247
FGF2	PD-0332991	-0.0700383	0.166259	2247
FGF2	PD-173074	-0.0815856	0.40801	2247
FGF2	PF-4708671	-0.0203658	0.876532	2247
FGF2	PF-562271	-0.0656607	0.213312	2247
FGF2	PFI-1	0.0228937	0.67481	2247
FGF2	PHA-665752	-0.0584199	0.691394	2247
FGF2	PHA-793887	0.239395	1.3128e-12	2247
FGF2	PI-103	0.160585	4.55868e-06	2247
FGF2	PIK-93	0.17753	2.33791e-07	2247
FGF2	PLX4720	0.00222513	0.967032	2247
FGF2	Paclitaxel	-0.0332584	0.795789	2247
FGF2	Parthenolide	-0.00572685	0.967783	2247
FGF2	Pazopanib	-0.208111	2.97291e-07	2247
FGF2	Phenformin	0.23496	1.74553e-11	2247
FGF2	Pyrimethamine	0.0629002	0.587258	2247
FGF2	QL-VIII-58	-0.0694797	0.342994	2247
FGF2	QL-X-138	0.178158	3.6648e-07	2247
FGF2	QL-XI-92	0.104537	0.00343425	2247
FGF2	QL-XII-47	0.123022	0.00105483	2247
FGF2	QL-XII-61	0.113199	0.0590963	2247
FGF2	QS11	0.0699562	0.212048	2247
FGF2	RDEA119	0.00801349	0.850014	2247
FGF2	RO-3306	-0.168778	1.8386e-05	2247
FGF2	Rapamycin	0.0733335	0.513822	2247
FGF2	Roscovitine	-0.0822428	0.592831	2247
FGF2	Ruxolitinib	0.0614715	0.198564	2247
FGF2	S-Trityl-L-cysteine	0.0882736	0.254963	2247
FGF2	SB 216763	-0.184486	2.5114e-05	2247
FGF2	SB 505124	-0.0721853	0.26485	2247
FGF2	SB52334	0.0760888	0.0767132	2247
FGF2	SB590885	0.0700371	0.139152	2247
FGF2	SGC0946	-0.0485395	0.353239	2247
FGF2	SL 0101-1	-0.0279988	0.737239	2247
FGF2	SN-38	-0.0945342	0.0183665	2247
FGF2	SNX-2112	0.136382	0.000116363	2247
FGF2	STF-62247	0.0647734	0.105019	2247
FGF2	Salubrinal	0.010481	0.925063	2247
FGF2	Saracatinib	-0.110993	0.154158	2247
FGF2	Shikonin	-0.00536728	0.938169	2247
FGF2	Sorafenib	0.0283416	0.826474	2247
FGF2	Sunitinib	0.0305809	0.721656	2247
FGF2	T0901317	0.111419	0.0037022	2247
FGF2	TAE684	-0.0493602	0.675208	2247
FGF2	TAK-715	0.217021	3.47861e-10	2247
FGF2	TG101348	0.146914	2.5118e-05	2247
FGF2	TGX221	-0.315269	1.2892e-08	2247
FGF2	THZ-2-102-1	0.224709	7.23359e-11	2247
FGF2	THZ-2-49	0.0937575	0.0102103	2247
FGF2	TL-1-85	0.115817	0.00110336	2247
FGF2	TL-2-105	0.126748	0.000431306	2247
FGF2	TPCA-1	0.182988	9.53453e-08	2247
FGF2	TW 37	-0.172487	4.31756e-06	2247
FGF2	Talazoparib	-0.119196	0.00285828	2247
FGF2	Tamoxifen	-0.0199464	0.890922	2247
FGF2	Temozolomide	-0.00372222	0.972479	2247
FGF2	Temsirolimus	-0.131781	0.00138985	2247
FGF2	Thapsigargin	-0.0744821	0.17253	2247
FGF2	Tipifarnib	-0.0535582	0.385709	2247
FGF2	Tivozanib	0.00988967	0.898883	2247
FGF2	Trametinib	-0.0152519	0.716302	2247
FGF2	Tubastatin A	0.190819	2.99895e-08	2247
FGF2	UNC0638	0.191757	1.29706e-08	2247
FGF2	UNC1215	-0.0334097	0.536918	2247
FGF2	VNLG/124	0.104334	0.00694239	2247
FGF2	VX-11e	0.153304	0.000126072	2247
FGF2	VX-680	0.0445454	0.665039	2247
FGF2	VX-702	0.0339682	0.888947	2247
FGF2	Veliparib	-0.0566949	0.383457	2247
FGF2	Vinblastine	-0.0510353	0.252123	2247
FGF2	Vinorelbine	0.043827	0.430244	2247
FGF2	Vorinostat	0.233068	4.27029e-11	2247
FGF2	WH-4-023	-0.204622	0.00152401	2247
FGF2	WZ-1-84	-0.0288672	0.744977	2247
FGF2	WZ3105	0.298779	0	2247
FGF2	XAV939	-0.119721	0.00140508	2247
FGF2	XL-184	0.0466551	0.32212	2247
FGF2	XMD11-85h	0.0467191	0.796217	2247
FGF2	XMD13-2	0.210959	7.60119e-10	2247
FGF2	XMD14-99	0.131844	0.000283471	2247
FGF2	XMD15-27	0.0305445	0.550193	2247
FGF2	XMD8-85	-0.0127958	0.9051	2247
FGF2	XMD8-92	0.0442178	0.695224	2247
FGF2	Y-39983	0.0476495	0.219374	2247
FGF2	YK 4-279	-0.0861035	0.072513	2247
FGF2	YM155	0.0763044	0.101793	2247
FGF2	YM201636	0.117769	0.0009988	2247
FGF2	Z-LLNle-CHO	-0.0349163	0.67688	2247
FGF2	ZG-10	0.0144066	0.867476	2247
FGF2	ZM-447439	0.0596045	0.190764	2247
FGF2	ZSTK474	0.194765	2.03146e-08	2247
FGF2	Zibotentan	-0.00785333	0.987731	2247
FGF2	piperlongumine	-0.167393	8.92158e-06	2247
FGF2	rTRAIL	0.0214735	0.801071	2247
FGF2	selumetinib	0.0302138	0.45117	2247
ICAM1	(5Z)-7-Oxozeaenol	-0.168423	3.82322e-06	3383
ICAM1	17-AAG	-0.0892014	0.0165874	3383
ICAM1	5-Fluorouracil	0.038983	0.309044	3383
ICAM1	681640	0.00639239	0.931121	3383
ICAM1	A-443654	-0.0493965	0.785549	3383
ICAM1	A-770041	-0.186726	0.00475677	3383
ICAM1	AC220	0.0918538	0.0301228	3383
ICAM1	AG-014699	0.0491996	0.253618	3383
ICAM1	AICAR	0.00755021	0.870928	3383
ICAM1	AKT inhibitor VIII	0.0331164	0.494179	3383
ICAM1	AMG-706	0.0266665	0.701417	3383
ICAM1	AP-24534	0.0256345	0.572468	3383
ICAM1	AR-42	0.0954905	0.00752595	3383
ICAM1	AS601245	-0.055013	0.29576	3383
ICAM1	AS605240	-0.000628327	0.991307	3383
ICAM1	AT-7519	0.0329371	0.38522	3383
ICAM1	ATRA	0.0513824	0.292345	3383
ICAM1	AUY922	-0.108329	0.0143073	3383
ICAM1	AZ628	-0.0760409	0.304118	3383
ICAM1	AZD6482	-0.105238	0.0085284	3383
ICAM1	AZD7762	-0.0223737	0.61931	3383
ICAM1	AZD8055	-0.00665173	0.886829	3383
ICAM1	Afatinib	0.015899	0.70251	3383
ICAM1	Axitinib	0.106954	0.0173436	3383
ICAM1	BAY 61-3606	-0.0335379	0.440993	3383
ICAM1	BEZ235	-0.112199	0.00835312	3383
ICAM1	BHG712	0.0348144	0.364641	3383
ICAM1	BI-2536	-0.00479741	0.975615	3383
ICAM1	BIRB 0796	-0.037733	0.481478	3383
ICAM1	BIX02189	0.088637	0.0146016	3383
ICAM1	BMS-509744	-0.0128843	0.911034	3383
ICAM1	BMS-536924	0.0667579	0.245278	3383
ICAM1	BMS-708163	0.0538911	0.183864	3383
ICAM1	BMS-754807	0.126302	0.0051739	3383
ICAM1	BMS345541	0.107655	0.00243268	3383
ICAM1	BX-795	0.0474851	0.305627	3383
ICAM1	BX-912	0.172691	5.37245e-07	3383
ICAM1	Belinostat	0.0674955	0.0722502	3383
ICAM1	Bexarotene	0.0173001	0.855636	3383
ICAM1	Bicalutamide	0.00195542	0.973872	3383
ICAM1	Bleomycin	-0.105131	0.0239989	3383
ICAM1	Bleomycin (50 uM)	-0.166127	2.12863e-06	3383
ICAM1	Bortezomib	-0.266646	2.0174e-05	3383
ICAM1	Bosutinib	-0.0503605	0.336378	3383
ICAM1	Bryostatin 1	-0.0212331	0.724378	3383
ICAM1	CAL-101	-0.0124369	0.774444	3383
ICAM1	CAY10603	0.0779784	0.0305471	3383
ICAM1	CCT007093	0.0248489	0.60632	3383
ICAM1	CCT018159	-0.0259191	0.649247	3383
ICAM1	CEP-701	-0.0249208	0.578722	3383
ICAM1	CGP-082996	-0.143355	0.0553053	3383
ICAM1	CGP-60474	-0.227838	0.000505881	3383
ICAM1	CH5424802	0.00213545	0.980088	3383
ICAM1	CHIR-99021	-0.102817	0.00521976	3383
ICAM1	CI-1040	-0.0987087	0.0153827	3383
ICAM1	CMK	-0.158786	0.0798683	3383
ICAM1	CP466722	0.074399	0.0395146	3383
ICAM1	CP724714	0.0585983	0.249025	3383
ICAM1	CUDC-101	0.0600616	0.108785	3383
ICAM1	CX-5461	0.122365	0.000620969	3383
ICAM1	Camptothecin	-0.030323	0.53061	3383
ICAM1	Cetuximab	-0.0420726	0.319059	3383
ICAM1	Cisplatin	-0.0522099	0.28888	3383
ICAM1	Crizotinib	0.0419404	0.792304	3383
ICAM1	Cyclopamine	-0.0921389	0.331105	3383
ICAM1	Cytarabine	-0.0322381	0.55456	3383
ICAM1	DMOG	-0.10033	0.0143725	3383
ICAM1	Dabrafenib	-0.184731	7.0675e-07	3383
ICAM1	Dasatinib	-0.169564	0.00540272	3383
ICAM1	Docetaxel	-0.0592565	0.120699	3383
ICAM1	Doxorubicin	-0.063862	0.269322	3383
ICAM1	EHT 1864	0.0853667	0.118464	3383
ICAM1	EKB-569	0.0797364	0.041269	3383
ICAM1	EX-527	0.0491879	0.623207	3383
ICAM1	Elesclomol	-0.0572971	0.195034	3383
ICAM1	Embelin	-0.0795309	0.115895	3383
ICAM1	Epothilone B	-0.0603324	0.223405	3383
ICAM1	Erlotinib	-0.0124897	0.884363	3383
ICAM1	Etoposide	-0.0322583	0.533052	3383
ICAM1	FH535	-0.0470182	0.33254	3383
ICAM1	FK866	0.0945021	0.00886754	3383
ICAM1	FMK	0.0674571	0.268619	3383
ICAM1	FR-180204	0.0666523	0.165228	3383
ICAM1	FTI-277	-0.102519	0.00989789	3383
ICAM1	Foretinib	0.0978708	0.0109626	3383
ICAM1	GDC0449	-0.0627132	0.458249	3383
ICAM1	GDC0941	0.0105938	0.882965	3383
ICAM1	GNF-2	0.0383005	0.885254	3383
ICAM1	GSK-650394	0.0323531	0.680978	3383
ICAM1	GSK1070916	0.21087	1.31991e-09	3383
ICAM1	GSK1904529A	-0.00598644	0.916303	3383
ICAM1	GSK2126458	0.0887284	0.0163479	3383
ICAM1	GSK269962A	0.000653463	0.992733	3383
ICAM1	GSK429286A	0.1058	0.00586653	3383
ICAM1	GSK690693	0.112054	0.00185961	3383
ICAM1	GW 441756	-0.056414	0.723099	3383
ICAM1	GW-2580	0.0437388	0.891679	3383
ICAM1	GW843682X	-0.0150174	0.89836	3383
ICAM1	Gefitinib	-0.0136265	0.768341	3383
ICAM1	Gemcitabine	-0.0679612	0.145936	3383
ICAM1	Genentech Cpd 10	0.0997162	0.00590684	3383
ICAM1	HG-5-113-01	0.0679427	0.327969	3383
ICAM1	HG-5-88-01	0.0478396	0.75533	3383
ICAM1	HG-6-64-1	-0.0633487	0.166521	3383
ICAM1	I-BET-762	0.0882304	0.0120871	3383
ICAM1	IOX2	-0.0332266	0.586992	3383
ICAM1	IPA-3	-0.0294894	0.486959	3383
ICAM1	Imatinib	0.0955187	0.395541	3383
ICAM1	Ispinesib Mesylate	0.0748538	0.0416722	3383
ICAM1	JNJ-26854165	-0.0547671	0.268673	3383
ICAM1	JNK Inhibitor VIII	-0.0324491	0.473728	3383
ICAM1	JNK-9L	-0.101481	0.0310879	3383
ICAM1	JQ1	-0.010616	0.840051	3383
ICAM1	JQ12	-0.0549894	0.298165	3383
ICAM1	JW-7-24-1	0.0735091	0.0418643	3383
ICAM1	JW-7-52-1	-0.141087	0.0699737	3383
ICAM1	KIN001-055	0.027855	0.698798	3383
ICAM1	KIN001-102	0.131951	0.000157515	3383
ICAM1	KIN001-135	0.0559737	0.598307	3383
ICAM1	KIN001-236	0.0221152	0.586664	3383
ICAM1	KIN001-244	0.0431444	0.260693	3383
ICAM1	KIN001-260	-0.0251422	0.524423	3383
ICAM1	KIN001-266	0.0118349	0.836835	3383
ICAM1	KIN001-270	-0.00658212	0.892664	3383
ICAM1	KU-55933	-0.0553961	0.332532	3383
ICAM1	LAQ824	0.0386569	0.353518	3383
ICAM1	LFM-A13	-0.000881344	0.989985	3383
ICAM1	LY317615	0.0141571	0.783109	3383
ICAM1	Lapatinib	0.0390843	0.562635	3383
ICAM1	Lenalidomide	-0.0272862	0.75699	3383
ICAM1	Linifanib	0.044357	0.393134	3383
ICAM1	Lisitinib	0.125769	0.0078581	3383
ICAM1	MG-132	-0.222186	0.00103599	3383
ICAM1	MK-2206	0.0778749	0.105418	3383
ICAM1	MLN4924	-0.0859173	0.0994421	3383
ICAM1	MP470	0.0781655	0.063143	3383
ICAM1	MPS-1-IN-1	0.101534	0.00575131	3383
ICAM1	MS-275	-0.0342115	0.718457	3383
ICAM1	Masitinib	0.0594115	0.119248	3383
ICAM1	Methotrexate	0.0355858	0.364514	3383
ICAM1	Midostaurin	-0.0333438	0.483354	3383
ICAM1	Mitomycin C	-0.0156276	0.797392	3383
ICAM1	NG-25	0.0172574	0.665425	3383
ICAM1	NPK76-II-72-1	0.152576	9.37298e-06	3383
ICAM1	NSC-207895	0.0507442	0.257456	3383
ICAM1	NSC-87877	-0.00805886	0.913621	3383
ICAM1	NU-7441	-0.0341781	0.659401	3383
ICAM1	Navitoclax	0.157161	1.3951e-05	3383
ICAM1	Nilotinib	0.0336287	0.541677	3383
ICAM1	Nutlin-3a (-)	-0.00902527	0.881872	3383
ICAM1	OSI-027	0.0714892	0.0498988	3383
ICAM1	OSI-930	0.0415964	0.303922	3383
ICAM1	OSU-03012	-0.0458515	0.357916	3383
ICAM1	Obatoclax Mesylate	-0.100529	0.0176998	3383
ICAM1	Olaparib	0.0195129	0.691398	3383
ICAM1	PAC-1	-0.0141838	0.776559	3383
ICAM1	PD-0325901	-0.114187	0.00297043	3383
ICAM1	PD-0332991	0.0481804	0.381783	3383
ICAM1	PD-173074	0.0652474	0.591565	3383
ICAM1	PF-4708671	-0.0233135	0.854989	3383
ICAM1	PF-562271	0.0115353	0.867489	3383
ICAM1	PFI-1	-0.11415	0.00672509	3383
ICAM1	PHA-665752	0.0648505	0.650127	3383
ICAM1	PHA-793887	0.0427413	0.244146	3383
ICAM1	PI-103	0.071995	0.0485265	3383
ICAM1	PIK-93	0.061444	0.089607	3383
ICAM1	PLX4720	-0.19329	5.00797e-08	3383
ICAM1	Paclitaxel	-0.111748	0.212967	3383
ICAM1	Parthenolide	-0.0654487	0.520161	3383
ICAM1	Pazopanib	0.0269446	0.657784	3383
ICAM1	Phenformin	0.072443	0.051841	3383
ICAM1	Pyrimethamine	-0.0411122	0.740457	3383
ICAM1	QL-VIII-58	-0.0528615	0.502886	3383
ICAM1	QL-X-138	0.0767837	0.0368945	3383
ICAM1	QL-XI-92	0.0418492	0.270162	3383
ICAM1	QL-XII-47	0.0382898	0.361292	3383
ICAM1	QL-XII-61	-0.00133055	0.988434	3383
ICAM1	QS11	-0.00553725	0.949894	3383
ICAM1	RDEA119	-0.107754	0.00254689	3383
ICAM1	RO-3306	-0.0180047	0.697035	3383
ICAM1	Rapamycin	-0.0810891	0.453151	3383
ICAM1	Roscovitine	-0.0937781	0.521155	3383
ICAM1	Ruxolitinib	-0.0495829	0.320456	3383
ICAM1	S-Trityl-L-cysteine	-0.0613854	0.461495	3383
ICAM1	SB 216763	-0.071891	0.13437	3383
ICAM1	SB 505124	0.0575414	0.405263	3383
ICAM1	SB52334	0.151591	8.6271e-05	3383
ICAM1	SB590885	-0.133481	0.0014948	3383
ICAM1	SGC0946	-0.00426267	0.954686	3383
ICAM1	SL 0101-1	0.0243396	0.775443	3383
ICAM1	SN-38	-0.0570226	0.187836	3383
ICAM1	SNX-2112	0.0147947	0.718766	3383
ICAM1	STF-62247	0.0261462	0.555803	3383
ICAM1	Salubrinal	-0.0607826	0.479254	3383
ICAM1	Saracatinib	0.014804	0.883888	3383
ICAM1	Shikonin	-0.0663811	0.180719	3383
ICAM1	Sorafenib	0.0314785	0.807009	3383
ICAM1	Sunitinib	-0.0238085	0.792431	3383
ICAM1	T0901317	0.0167005	0.720485	3383
ICAM1	TAE684	0.0406062	0.74818	3383
ICAM1	TAK-715	0.0404631	0.28864	3383
ICAM1	TG101348	0.0910795	0.0107849	3383
ICAM1	TGX221	-0.140982	0.0208422	3383
ICAM1	THZ-2-102-1	0.0796596	0.0283758	3383
ICAM1	THZ-2-49	-0.0306655	0.434995	3383
ICAM1	TL-1-85	0.0166282	0.680962	3383
ICAM1	TL-2-105	0.12942	0.000317714	3383
ICAM1	TPCA-1	0.0339242	0.367327	3383
ICAM1	TW 37	-0.0682504	0.1161	3383
ICAM1	Talazoparib	0.000670286	0.991275	3383
ICAM1	Tamoxifen	-0.00254949	0.989263	3383
ICAM1	Temozolomide	-0.0950875	0.0662371	3383
ICAM1	Temsirolimus	-0.0864416	0.0502723	3383
ICAM1	Thapsigargin	-0.0067982	0.941331	3383
ICAM1	Tipifarnib	-0.0498725	0.430087	3383
ICAM1	Tivozanib	0.0898207	0.0590427	3383
ICAM1	Trametinib	-0.115452	0.00144779	3383
ICAM1	Tubastatin A	0.0916498	0.0102065	3383
ICAM1	UNC0638	0.0361632	0.32958	3383
ICAM1	UNC1215	0.040495	0.435828	3383
ICAM1	VNLG/124	0.0312331	0.483112	3383
ICAM1	VX-11e	0.000832605	0.990422	3383
ICAM1	VX-680	0.0612706	0.517218	3383
ICAM1	VX-702	0.0053793	0.986082	3383
ICAM1	Veliparib	-0.0325406	0.651598	3383
ICAM1	Vinblastine	-0.0445051	0.326821	3383
ICAM1	Vinorelbine	-0.00673383	0.92703	3383
ICAM1	Vorinostat	0.095329	0.00937559	3383
ICAM1	WH-4-023	-0.120329	0.0860336	3383
ICAM1	WZ-1-84	-0.0368969	0.671114	3383
ICAM1	WZ3105	0.141958	4.6254e-05	3383
ICAM1	XAV939	-0.079146	0.0399688	3383
ICAM1	XL-184	0.0982001	0.0182438	3383
ICAM1	XMD11-85h	0.00362	0.988097	3383
ICAM1	XMD13-2	0.0870744	0.0153047	3383
ICAM1	XMD14-99	0.0332308	0.412895	3383
ICAM1	XMD15-27	0.0189263	0.728095	3383
ICAM1	XMD8-85	-0.0802012	0.311978	3383
ICAM1	XMD8-92	-0.112245	0.187102	3383
ICAM1	Y-39983	0.0452509	0.245586	3383
ICAM1	YK 4-279	-0.0594922	0.245345	3383
ICAM1	YM155	-0.0495483	0.331084	3383
ICAM1	YM201636	0.107723	0.00275553	3383
ICAM1	Z-LLNle-CHO	-0.311591	8.96303e-08	3383
ICAM1	ZG-10	0.0329957	0.657614	3383
ICAM1	ZM-447439	0.104949	0.0123685	3383
ICAM1	ZSTK474	0.0614757	0.0963534	3383
ICAM1	Zibotentan	-0.0230656	0.947443	3383
ICAM1	piperlongumine	-0.117921	0.00256836	3383
ICAM1	rTRAIL	-0.0050412	0.960787	3383
ICAM1	selumetinib	-0.125958	0.000381847	3383
ICAM3	(5Z)-7-Oxozeaenol	-0.0982781	0.0104793	3385
ICAM3	17-AAG	0.0336885	0.392542	3385
ICAM3	5-Fluorouracil	-0.0513245	0.171634	3385
ICAM3	681640	0.0171229	0.80559	3385
ICAM3	A-443654	-0.0767329	0.618719	3385
ICAM3	A-770041	-0.161428	0.0169255	3385
ICAM3	AC220	-0.03782	0.449117	3385
ICAM3	AG-014699	0.201341	1.86317e-07	3385
ICAM3	AICAR	-0.103994	0.0070538	3385
ICAM3	AKT inhibitor VIII	-0.00276085	0.962235	3385
ICAM3	AMG-706	0.00307504	0.971285	3385
ICAM3	AP-24534	-0.150817	6.4238e-05	3385
ICAM3	AR-42	-0.077485	0.0318653	3385
ICAM3	AS601245	-0.0336743	0.558553	3385
ICAM3	AS605240	-0.0883775	0.0279944	3385
ICAM3	AT-7519	-0.123768	0.000433732	3385
ICAM3	ATRA	-0.113279	0.00766722	3385
ICAM3	AUY922	-0.0634509	0.194743	3385
ICAM3	AZ628	-0.0731974	0.326459	3385
ICAM3	AZD6482	-0.158859	3.3577e-05	3385
ICAM3	AZD7762	-0.142835	0.000164679	3385
ICAM3	AZD8055	-0.159224	2.2555e-05	3385
ICAM3	Afatinib	0.037901	0.330746	3385
ICAM3	Axitinib	-0.0130741	0.845797	3385
ICAM3	BAY 61-3606	-0.0492206	0.239742	3385
ICAM3	BEZ235	-0.0661431	0.152102	3385
ICAM3	BHG712	-0.204291	3.12412e-09	3385
ICAM3	BI-2536	-0.0777308	0.42718	3385
ICAM3	BIRB 0796	0.0384513	0.471968	3385
ICAM3	BIX02189	-0.162457	3.6381e-06	3385
ICAM3	BMS-509744	0.0331862	0.745079	3385
ICAM3	BMS-536924	0.0823617	0.125404	3385
ICAM3	BMS-708163	0.0242015	0.580591	3385
ICAM3	BMS-754807	0.160405	0.000240762	3385
ICAM3	BMS345541	-0.111962	0.00157453	3385
ICAM3	BX-795	0.00276326	0.965626	3385
ICAM3	BX-912	-0.0500227	0.172654	3385
ICAM3	Belinostat	-0.0595215	0.116136	3385
ICAM3	Bexarotene	-0.036447	0.639251	3385
ICAM3	Bicalutamide	0.0202424	0.689144	3385
ICAM3	Bleomycin	0.0226201	0.724233	3385
ICAM3	Bleomycin (50 uM)	0.130128	0.000240436	3385
ICAM3	Bortezomib	-0.136764	0.0423394	3385
ICAM3	Bosutinib	-0.0951505	0.0354318	3385
ICAM3	Bryostatin 1	-0.0149897	0.812737	3385
ICAM3	CAL-101	-0.204012	5.51185e-09	3385
ICAM3	CAY10603	-0.0881899	0.0138527	3385
ICAM3	CCT007093	-0.0281175	0.554348	3385
ICAM3	CCT018159	-0.00108487	0.987404	3385
ICAM3	CEP-701	-0.130593	0.000651899	3385
ICAM3	CGP-082996	-0.0861015	0.321681	3385
ICAM3	CGP-60474	-0.130066	0.0707058	3385
ICAM3	CH5424802	-0.0290939	0.658658	3385
ICAM3	CHIR-99021	-0.049305	0.207853	3385
ICAM3	CI-1040	-0.0985026	0.0156285	3385
ICAM3	CMK	-0.0800838	0.457062	3385
ICAM3	CP466722	-0.143994	3.7744e-05	3385
ICAM3	CP724714	-0.0294884	0.618111	3385
ICAM3	CUDC-101	-0.0920862	0.0116448	3385
ICAM3	CX-5461	0.0308911	0.431334	3385
ICAM3	Camptothecin	0.0501734	0.26171	3385
ICAM3	Cetuximab	0.0304419	0.484859	3385
ICAM3	Cisplatin	0.109709	0.0124231	3385
ICAM3	Crizotinib	-0.0428462	0.787526	3385
ICAM3	Cyclopamine	-0.162204	0.0467954	3385
ICAM3	Cytarabine	-0.0058099	0.930475	3385
ICAM3	DMOG	-0.0608377	0.168896	3385
ICAM3	Dabrafenib	-0.0828349	0.0428495	3385
ICAM3	Dasatinib	-0.105628	0.101551	3385
ICAM3	Docetaxel	0.101284	0.00646722	3385
ICAM3	Doxorubicin	0.0546379	0.362483	3385
ICAM3	EHT 1864	0.000935265	0.992092	3385
ICAM3	EKB-569	-0.18936	1.82207e-07	3385
ICAM3	EX-527	-0.0337116	0.763765	3385
ICAM3	Elesclomol	0.036881	0.431394	3385
ICAM3	Embelin	-0.0188532	0.796033	3385
ICAM3	Epothilone B	0.0636105	0.195468	3385
ICAM3	Erlotinib	0.0545617	0.468535	3385
ICAM3	Etoposide	0.0729414	0.0994898	3385
ICAM3	FH535	-0.059601	0.19963	3385
ICAM3	FK866	0.0347415	0.366231	3385
ICAM3	FMK	-0.0836188	0.142368	3385
ICAM3	FR-180204	-0.0324915	0.562754	3385
ICAM3	FTI-277	0.0185577	0.688455	3385
ICAM3	Foretinib	0.0499993	0.232841	3385
ICAM3	GDC0449	-0.034649	0.738848	3385
ICAM3	GDC0941	-0.0883296	0.060125	3385
ICAM3	GNF-2	0.00105472	0.998484	3385
ICAM3	GSK-650394	0.0627713	0.334479	3385
ICAM3	GSK1070916	-0.0112549	0.788177	3385
ICAM3	GSK1904529A	0.0375843	0.430875	3385
ICAM3	GSK2126458	-0.127502	0.000415796	3385
ICAM3	GSK269962A	-0.0250468	0.672028	3385
ICAM3	GSK429286A	-0.0551754	0.184642	3385
ICAM3	GSK690693	-0.148116	2.8446e-05	3385
ICAM3	GW 441756	-0.0100256	0.978847	3385
ICAM3	GW-2580	0.00919519	0.994591	3385
ICAM3	GW843682X	-0.0991003	0.219352	3385
ICAM3	Gefitinib	0.0493341	0.242181	3385
ICAM3	Gemcitabine	0.0281599	0.604374	3385
ICAM3	Genentech Cpd 10	-0.0649232	0.0821895	3385
ICAM3	HG-5-113-01	0.0972141	0.134905	3385
ICAM3	HG-5-88-01	0.0474298	0.758328	3385
ICAM3	HG-6-64-1	-0.0809566	0.0639	3385
ICAM3	I-BET-762	-0.202962	2.32961e-09	3385
ICAM3	IOX2	0.00678554	0.931472	3385
ICAM3	IPA-3	-0.0830147	0.0324802	3385
ICAM3	Imatinib	-0.0393503	0.821206	3385
ICAM3	Ispinesib Mesylate	-0.0649744	0.0802478	3385
ICAM3	JNJ-26854165	-0.0396675	0.450615	3385
ICAM3	JNK Inhibitor VIII	0.0655045	0.120861	3385
ICAM3	JNK-9L	-0.0352383	0.557509	3385
ICAM3	JQ1	-0.0665953	0.109002	3385
ICAM3	JQ12	-0.044557	0.417248	3385
ICAM3	JW-7-24-1	-0.10348	0.00352503	3385
ICAM3	JW-7-52-1	-0.176534	0.0153895	3385
ICAM3	KIN001-055	-0.0179654	0.825236	3385
ICAM3	KIN001-102	-0.19806	7.61234e-09	3385
ICAM3	KIN001-135	0.0753154	0.443018	3385
ICAM3	KIN001-236	-0.128784	0.000325657	3385
ICAM3	KIN001-244	-0.107726	0.00279719	3385
ICAM3	KIN001-260	-0.175443	4.91443e-07	3385
ICAM3	KIN001-266	-0.0234362	0.65729	3385
ICAM3	KIN001-270	-0.00914952	0.84915	3385
ICAM3	KU-55933	-0.145378	0.0016075	3385
ICAM3	LAQ824	-0.0362805	0.386218	3385
ICAM3	LFM-A13	-0.000612095	0.992227	3385
ICAM3	LY317615	-0.143778	0.00020967	3385
ICAM3	Lapatinib	0.0234214	0.738126	3385
ICAM3	Lenalidomide	-0.0974311	0.0807392	3385
ICAM3	Linifanib	-0.0982311	0.0228888	3385
ICAM3	Lisitinib	0.119015	0.0134839	3385
ICAM3	MG-132	-0.0942769	0.238687	3385
ICAM3	MK-2206	-0.170735	7.6077e-05	3385
ICAM3	MLN4924	0.0464368	0.418775	3385
ICAM3	MP470	-0.0218317	0.645217	3385
ICAM3	MPS-1-IN-1	0.0287103	0.479018	3385
ICAM3	MS-275	-0.0300619	0.755004	3385
ICAM3	Masitinib	-0.141196	8.4486e-05	3385
ICAM3	Methotrexate	-0.175269	1.02162e-06	3385
ICAM3	Midostaurin	0.0160917	0.755072	3385
ICAM3	Mitomycin C	0.0706286	0.137515	3385
ICAM3	NG-25	-0.166826	1.5517e-06	3385
ICAM3	NPK76-II-72-1	-0.083147	0.0189415	3385
ICAM3	NSC-207895	0.0923108	0.024545	3385
ICAM3	NSC-87877	0.121002	0.0154354	3385
ICAM3	NU-7441	-0.0916915	0.111384	3385
ICAM3	Navitoclax	-0.0560805	0.143208	3385
ICAM3	Nilotinib	-0.0857275	0.0613229	3385
ICAM3	Nutlin-3a (-)	-0.027735	0.600736	3385
ICAM3	OSI-027	-0.0591036	0.109307	3385
ICAM3	OSI-930	-0.173557	1.47601e-06	3385
ICAM3	OSU-03012	-0.02513	0.649809	3385
ICAM3	Obatoclax Mesylate	-0.0666894	0.140939	3385
ICAM3	Olaparib	0.171012	8.56674e-06	3385
ICAM3	PAC-1	-0.102231	0.010082	3385
ICAM3	PD-0325901	-0.0601926	0.138014	3385
ICAM3	PD-0332991	-0.0683898	0.179013	3385
ICAM3	PD-173074	-0.0366881	0.815684	3385
ICAM3	PF-4708671	0.030097	0.789781	3385
ICAM3	PF-562271	0.0212926	0.739419	3385
ICAM3	PFI-1	-0.119732	0.00425392	3385
ICAM3	PHA-665752	0.044885	0.770878	3385
ICAM3	PHA-793887	-0.0986343	0.00501402	3385
ICAM3	PI-103	-0.0817911	0.0240171	3385
ICAM3	PIK-93	-0.199121	5.53336e-09	3385
ICAM3	PLX4720	-0.0464269	0.270604	3385
ICAM3	Paclitaxel	-0.095083	0.313256	3385
ICAM3	Parthenolide	-0.096929	0.30341	3385
ICAM3	Pazopanib	-0.0377259	0.51157	3385
ICAM3	Phenformin	-0.17748	5.85036e-07	3385
ICAM3	Pyrimethamine	-0.0165625	0.908002	3385
ICAM3	QL-VIII-58	-0.0625186	0.408438	3385
ICAM3	QL-X-138	-0.065895	0.075923	3385
ICAM3	QL-XI-92	-0.107121	0.0026841	3385
ICAM3	QL-XII-47	-0.0358854	0.395342	3385
ICAM3	QL-XII-61	-0.177165	0.00153382	3385
ICAM3	QS11	0.0365171	0.574315	3385
ICAM3	RDEA119	-0.0609458	0.103812	3385
ICAM3	RO-3306	0.0571926	0.17582	3385
ICAM3	Rapamycin	-0.143727	0.11506	3385
ICAM3	Roscovitine	-0.0459449	0.802083	3385
ICAM3	Ruxolitinib	-0.0210429	0.725149	3385
ICAM3	S-Trityl-L-cysteine	-0.150097	0.0350643	3385
ICAM3	SB 216763	0.0195922	0.7229	3385
ICAM3	SB 505124	0.0935564	0.114879	3385
ICAM3	SB52334	0.130482	0.000898477	3385
ICAM3	SB590885	-0.0458963	0.361233	3385
ICAM3	SGC0946	0.018108	0.777308	3385
ICAM3	SL 0101-1	0.000697612	0.996243	3385
ICAM3	SN-38	0.0326977	0.490476	3385
ICAM3	SNX-2112	-0.126116	0.000387881	3385
ICAM3	STF-62247	-0.183414	6.76855e-07	3385
ICAM3	Salubrinal	-0.108706	0.164352	3385
ICAM3	Saracatinib	-0.0422718	0.637208	3385
ICAM3	Shikonin	-0.0345552	0.540102	3385
ICAM3	Sorafenib	-0.0618788	0.564859	3385
ICAM3	Sunitinib	-0.121932	0.0692228	3385
ICAM3	T0901317	-0.107589	0.00521937	3385
ICAM3	TAE684	0.0552563	0.629865	3385
ICAM3	TAK-715	-0.161246	4.19867e-06	3385
ICAM3	TG101348	-0.0964354	0.00676446	3385
ICAM3	TGX221	-0.0566458	0.399154	3385
ICAM3	THZ-2-102-1	-0.123749	0.000493797	3385
ICAM3	THZ-2-49	-0.244206	1.89919e-12	3385
ICAM3	TL-1-85	-0.18458	9.57242e-08	3385
ICAM3	TL-2-105	-0.0687787	0.0656871	3385
ICAM3	TPCA-1	-0.115948	0.000935756	3385
ICAM3	TW 37	0.0493207	0.28416	3385
ICAM3	Talazoparib	0.161777	2.5844e-05	3385
ICAM3	Tamoxifen	-0.0850614	0.314305	3385
ICAM3	Temozolomide	-0.0434683	0.538539	3385
ICAM3	Temsirolimus	-0.168875	2.4188e-05	3385
ICAM3	Thapsigargin	0.0648178	0.252581	3385
ICAM3	Tipifarnib	-0.0358892	0.605436	3385
ICAM3	Tivozanib	-0.0842323	0.0811636	3385
ICAM3	Trametinib	-0.0339	0.393811	3385
ICAM3	Tubastatin A	-0.105865	0.00280924	3385
ICAM3	UNC0638	-0.0786609	0.0263158	3385
ICAM3	UNC1215	0.065385	0.171424	3385
ICAM3	VNLG/124	-0.101989	0.00846956	3385
ICAM3	VX-11e	-0.0661237	0.141706	3385
ICAM3	VX-680	-0.0537189	0.58148	3385
ICAM3	VX-702	-0.0198689	0.939314	3385
ICAM3	Veliparib	0.00853479	0.924706	3385
ICAM3	Vinblastine	-0.117394	0.00354678	3385
ICAM3	Vinorelbine	0.000564641	0.994592	3385
ICAM3	Vorinostat	-0.0587442	0.117442	3385
ICAM3	WH-4-023	-0.0698851	0.368583	3385
ICAM3	WZ-1-84	-0.0665768	0.399079	3385
ICAM3	WZ3105	-0.135816	0.00010046	3385
ICAM3	XAV939	0.0389345	0.336991	3385
ICAM3	XL-184	-0.0410957	0.39347	3385
ICAM3	XMD11-85h	-0.0635224	0.693054	3385
ICAM3	XMD13-2	-0.0891978	0.0128546	3385
ICAM3	XMD14-99	-0.102361	0.0054649	3385
ICAM3	XMD15-27	-0.123559	0.00238253	3385
ICAM3	XMD8-85	-0.141155	0.0443903	3385
ICAM3	XMD8-92	-0.134861	0.0925151	3385
ICAM3	Y-39983	-0.110759	0.00229888	3385
ICAM3	YK 4-279	-0.0637925	0.207107	3385
ICAM3	YM155	-0.00569005	0.938152	3385
ICAM3	YM201636	-0.0632199	0.0898049	3385
ICAM3	Z-LLNle-CHO	-0.235993	7.7801e-05	3385
ICAM3	ZG-10	0.00204149	0.982477	3385
ICAM3	ZM-447439	-0.0287925	0.574822	3385
ICAM3	ZSTK474	-0.177778	3.5068e-07	3385
ICAM3	Zibotentan	-0.0711276	0.607993	3385
ICAM3	piperlongumine	-0.0274846	0.565948	3385
ICAM3	rTRAIL	-0.0100973	0.917357	3385
ICAM3	selumetinib	-0.0565537	0.135895	3385
ITGA2	(5Z)-7-Oxozeaenol	-0.0536768	0.196003	3673
ITGA2	17-AAG	-0.349546	2.05771e-24	3673
ITGA2	5-Fluorouracil	0.216073	4.48096e-10	3673
ITGA2	681640	-0.129338	0.0143797	3673
ITGA2	A-443654	-0.0481783	0.792056	3673
ITGA2	A-770041	-0.12058	0.089463	3673
ITGA2	AC220	0.16417	1.9125e-05	3673
ITGA2	AG-014699	-0.0441335	0.311629	3673
ITGA2	AICAR	0.0793182	0.0443297	3673
ITGA2	AKT inhibitor VIII	-0.12755	0.0018946	3673
ITGA2	AMG-706	-0.017064	0.815186	3673
ITGA2	AP-24534	0.173151	3.2766e-06	3673
ITGA2	AR-42	0.307057	0	3673
ITGA2	AS601245	-0.114084	0.0111137	3673
ITGA2	AS605240	0.0453452	0.302644	3673
ITGA2	AT-7519	0.209817	9.26594e-10	3673
ITGA2	ATRA	0.176394	8.96078e-06	3673
ITGA2	AUY922	-0.0764776	0.105571	3673
ITGA2	AZ628	-0.158382	0.0140459	3673
ITGA2	AZD6482	0.0257816	0.628245	3673
ITGA2	AZD7762	0.186157	5.83715e-07	3673
ITGA2	AZD8055	0.219545	2.52526e-09	3673
ITGA2	Afatinib	-0.327314	2.27563e-23	3673
ITGA2	Axitinib	0.143152	0.000912659	3673
ITGA2	BAY 61-3606	0.170467	6.11257e-06	3673
ITGA2	BEZ235	-0.014103	0.81048	3673
ITGA2	BHG712	0.252562	1.17345e-13	3673
ITGA2	BI-2536	-0.0443403	0.700297	3673
ITGA2	BIRB 0796	-0.0762083	0.114313	3673
ITGA2	BIX02189	0.256593	5.85636e-14	3673
ITGA2	BMS-509744	-0.152012	0.0616434	3673
ITGA2	BMS-536924	0.000406038	0.996097	3673
ITGA2	BMS-708163	-0.202389	1.15509e-07	3673
ITGA2	BMS-754807	-0.0515832	0.338053	3673
ITGA2	BMS345541	0.240134	1.97079e-12	3673
ITGA2	BX-795	0.114837	0.00490567	3673
ITGA2	BX-912	0.33567	0	3673
ITGA2	Belinostat	0.25232	4.32198e-13	3673
ITGA2	Bexarotene	-0.0307639	0.704067	3673
ITGA2	Bicalutamide	-0.145841	0.000272124	3673
ITGA2	Bleomycin	-0.0698965	0.168754	3673
ITGA2	Bleomycin (50 uM)	-0.232152	1.69541e-11	3673
ITGA2	Bortezomib	-0.115724	0.0981558	3673
ITGA2	Bosutinib	-0.0739318	0.12051	3673
ITGA2	Bryostatin 1	-0.10336	0.0240301	3673
ITGA2	CAL-101	0.201413	8.95162e-09	3673
ITGA2	CAY10603	0.319754	0	3673
ITGA2	CCT007093	-0.122109	0.0022617	3673
ITGA2	CCT018159	-0.122712	0.00530559	3673
ITGA2	CEP-701	0.205646	2.67624e-08	3673
ITGA2	CGP-082996	-0.0866658	0.316975	3673
ITGA2	CGP-60474	-0.103013	0.17573	3673
ITGA2	CH5424802	0.0663765	0.202711	3673
ITGA2	CHIR-99021	-0.0706767	0.0626721	3673
ITGA2	CI-1040	-0.205159	7.01445e-08	3673
ITGA2	CMK	0.0113565	0.941232	3673
ITGA2	CP466722	0.278731	0	3673
ITGA2	CP724714	-0.0643902	0.195358	3673
ITGA2	CUDC-101	0.241895	2.75214e-12	3673
ITGA2	CX-5461	0.242244	1.96025e-12	3673
ITGA2	Camptothecin	0.138061	0.000433919	3673
ITGA2	Cetuximab	-0.274128	5.70649e-14	3673
ITGA2	Cisplatin	0.0193718	0.736977	3673
ITGA2	Crizotinib	0.00263451	0.992277	3673
ITGA2	Cyclopamine	0.0704798	0.492448	3673
ITGA2	Cytarabine	0.0227379	0.6933	3673
ITGA2	DMOG	0.0971965	0.0183133	3673
ITGA2	Dabrafenib	-0.0526346	0.224849	3673
ITGA2	Dasatinib	-0.246267	2.7592e-05	3673
ITGA2	Docetaxel	-0.318094	1.18622e-19	3673
ITGA2	Doxorubicin	-0.0167837	0.829377	3673
ITGA2	EHT 1864	0.0975422	0.0678651	3673
ITGA2	EKB-569	0.011152	0.816317	3673
ITGA2	EX-527	0.0276874	0.81699	3673
ITGA2	Elesclomol	-0.0361779	0.441089	3673
ITGA2	Embelin	-0.0892578	0.0701092	3673
ITGA2	Epothilone B	-0.161846	0.000208865	3673
ITGA2	Erlotinib	-0.293296	1.0675e-06	3673
ITGA2	Etoposide	0.0846856	0.0509404	3673
ITGA2	FH535	-0.0654785	0.152789	3673
ITGA2	FK866	0.301724	0	3673
ITGA2	FMK	0.00309354	0.973763	3673
ITGA2	FR-180204	0.0442967	0.398279	3673
ITGA2	FTI-277	-0.176546	4.18567e-06	3673
ITGA2	Foretinib	0.152972	3.1907e-05	3673
ITGA2	GDC0449	0.0116732	0.932196	3673
ITGA2	GDC0941	0.0264041	0.677702	3673
ITGA2	GNF-2	-0.0626811	0.780894	3673
ITGA2	GSK-650394	-0.0407346	0.581138	3673
ITGA2	GSK1070916	0.280099	0	3673
ITGA2	GSK1904529A	-0.104705	0.0135518	3673
ITGA2	GSK2126458	0.177257	5.34175e-07	3673
ITGA2	GSK269962A	0.0710598	0.122586	3673
ITGA2	GSK429286A	0.20799	9.70089e-09	3673
ITGA2	GSK690693	0.257121	5.7495e-14	3673
ITGA2	GW 441756	0.00816824	0.986204	3673
ITGA2	GW-2580	0.0305725	0.944292	3673
ITGA2	GW843682X	0.00962364	0.937423	3673
ITGA2	Gefitinib	-0.309415	3.68248e-18	3673
ITGA2	Gemcitabine	0.0211844	0.70694	3673
ITGA2	Genentech Cpd 10	0.273316	0	3673
ITGA2	HG-5-113-01	0.0657758	0.347412	3673
ITGA2	HG-5-88-01	-0.0422838	0.790094	3673
ITGA2	HG-6-64-1	0.0480236	0.319574	3673
ITGA2	I-BET-762	0.377489	0	3673
ITGA2	IOX2	-0.101123	0.045874	3673
ITGA2	IPA-3	0.195123	9.51849e-08	3673
ITGA2	Imatinib	0.0235572	0.898283	3673
ITGA2	Ispinesib Mesylate	0.2002	7.65459e-09	3673
ITGA2	JNJ-26854165	-0.0731322	0.116289	3673
ITGA2	JNK Inhibitor VIII	-0.180362	3.36561e-06	3673
ITGA2	JNK-9L	0.014702	0.8365	3673
ITGA2	JQ1	0.0824821	0.042153	3673
ITGA2	JQ12	0.0563914	0.283193	3673
ITGA2	JW-7-24-1	0.341792	0	3673
ITGA2	JW-7-52-1	-0.103936	0.224985	3673
ITGA2	KIN001-055	-0.110343	0.0204469	3673
ITGA2	KIN001-102	0.293499	0	3673
ITGA2	KIN001-135	-0.0484734	0.657329	3673
ITGA2	KIN001-236	0.266658	7.82983e-15	3673
ITGA2	KIN001-244	0.264532	1.49182e-14	3673
ITGA2	KIN001-260	0.318906	0	3673
ITGA2	KIN001-266	0.127624	0.00254173	3673
ITGA2	KIN001-270	0.221341	7.6322e-10	3673
ITGA2	KU-55933	0.0393445	0.53507	3673
ITGA2	LAQ824	0.184557	4.98233e-07	3673
ITGA2	LFM-A13	-0.0486948	0.336856	3673
ITGA2	LY317615	0.0347037	0.451339	3673
ITGA2	Lapatinib	-0.325553	2.95837e-09	3673
ITGA2	Lenalidomide	0.0106856	0.921753	3673
ITGA2	Linifanib	0.112033	0.00757639	3673
ITGA2	Lisitinib	0.0182602	0.817296	3673
ITGA2	MG-132	-0.0931951	0.244895	3673
ITGA2	MK-2206	0.139005	0.00169771	3673
ITGA2	MLN4924	-0.0483329	0.396749	3673
ITGA2	MP470	0.191757	7.17187e-06	3673
ITGA2	MPS-1-IN-1	0.186219	1.52251e-07	3673
ITGA2	MS-275	0.172031	0.0128954	3673
ITGA2	Masitinib	0.260638	4.11322e-14	3673
ITGA2	Methotrexate	0.313623	0	3673
ITGA2	Midostaurin	-0.0896315	0.0321795	3673
ITGA2	Mitomycin C	0.0572233	0.246947	3673
ITGA2	NG-25	0.314001	0	3673
ITGA2	NPK76-II-72-1	0.382012	0	3673
ITGA2	NSC-207895	0.202367	2.36949e-07	3673
ITGA2	NSC-87877	-0.0843474	0.100581	3673
ITGA2	NU-7441	0.00990416	0.92613	3673
ITGA2	Navitoclax	0.332434	0	3673
ITGA2	Nilotinib	0.10899	0.0131855	3673
ITGA2	Nutlin-3a (-)	0.0918543	0.0339807	3673
ITGA2	OSI-027	0.311456	0	3673
ITGA2	OSI-930	0.18342	3.31336e-07	3673
ITGA2	OSU-03012	-0.0194576	0.735768	3673
ITGA2	Obatoclax Mesylate	0.0106597	0.857195	3673
ITGA2	Olaparib	0.00506869	0.926007	3673
ITGA2	PAC-1	0.163284	1.8601e-05	3673
ITGA2	PD-0325901	-0.265514	2.83204e-13	3673
ITGA2	PD-0332991	-0.00116773	0.987852	3673
ITGA2	PD-173074	0.0668416	0.573387	3673
ITGA2	PF-4708671	-0.0235212	0.853291	3673
ITGA2	PF-562271	-0.118586	0.0124753	3673
ITGA2	PFI-1	0.0476406	0.322555	3673
ITGA2	PHA-665752	-0.125441	0.26824	3673
ITGA2	PHA-793887	0.29217	0	3673
ITGA2	PI-103	0.295461	0	3673
ITGA2	PIK-93	0.334821	0	3673
ITGA2	PLX4720	-0.0558517	0.177428	3673
ITGA2	Paclitaxel	-0.112706	0.208498	3673
ITGA2	Parthenolide	0.0833845	0.386594	3673
ITGA2	Pazopanib	0.0614789	0.237462	3673
ITGA2	Phenformin	0.198228	1.99156e-08	3673
ITGA2	Pyrimethamine	0.0418016	0.734367	3673
ITGA2	QL-VIII-58	0.0411319	0.62102	3673
ITGA2	QL-X-138	0.309162	0	3673
ITGA2	QL-XI-92	0.275568	0	3673
ITGA2	QL-XII-47	0.165227	6.98864e-06	3673
ITGA2	QL-XII-61	0.251412	2.43941e-06	3673
ITGA2	QS11	0.0322069	0.629919	3673
ITGA2	RDEA119	-0.318436	4.79932e-22	3673
ITGA2	RO-3306	-0.190573	1.05783e-06	3673
ITGA2	Rapamycin	0.00090779	0.995339	3673
ITGA2	Roscovitine	-0.0459813	0.801896	3673
ITGA2	Ruxolitinib	0.111249	0.00854657	3673
ITGA2	S-Trityl-L-cysteine	0.0521017	0.5464	3673
ITGA2	SB 216763	-0.170977	0.000114316	3673
ITGA2	SB 505124	0.0633675	0.345814	3673
ITGA2	SB52334	0.159336	3.2458e-05	3673
ITGA2	SB590885	-0.0600134	0.215455	3673
ITGA2	SGC0946	-0.114262	0.00944758	3673
ITGA2	SL 0101-1	-0.0824703	0.259008	3673
ITGA2	SN-38	0.0692903	0.0990961	3673
ITGA2	SNX-2112	0.193742	2.33892e-08	3673
ITGA2	STF-62247	0.199008	5.4429e-08	3673
ITGA2	Salubrinal	0.118306	0.124848	3673
ITGA2	Saracatinib	-0.162453	0.0278045	3673
ITGA2	Shikonin	0.0756453	0.118669	3673
ITGA2	Sorafenib	0.056546	0.61316	3673
ITGA2	Sunitinib	0.0666017	0.379046	3673
ITGA2	T0901317	0.17019	4.01208e-06	3673
ITGA2	TAE684	-0.0679891	0.529397	3673
ITGA2	TAK-715	0.196487	1.52778e-08	3673
ITGA2	TG101348	0.319948	0	3673
ITGA2	TGX221	-0.200104	0.000644116	3673
ITGA2	THZ-2-102-1	0.316556	0	3673
ITGA2	THZ-2-49	0.233827	1.76391e-11	3673
ITGA2	TL-1-85	0.309302	0	3673
ITGA2	TL-2-105	0.244907	1.45867e-12	3673
ITGA2	TPCA-1	0.335357	0	3673
ITGA2	TW 37	0.0996494	0.014033	3673
ITGA2	Talazoparib	0.0718077	0.0955788	3673
ITGA2	Tamoxifen	-0.0268452	0.841023	3673
ITGA2	Temozolomide	0.0182732	0.833717	3673
ITGA2	Temsirolimus	0.0764639	0.0910193	3673
ITGA2	Thapsigargin	-0.0635792	0.265051	3673
ITGA2	Tipifarnib	-0.0338796	0.631179	3673
ITGA2	Tivozanib	0.109048	0.0156565	3673
ITGA2	Trametinib	-0.40956	4.9954e-36	3673
ITGA2	Tubastatin A	0.318788	0	3673
ITGA2	UNC0638	0.294552	0	3673
ITGA2	UNC1215	-0.0993498	0.0266102	3673
ITGA2	VNLG/124	0.179734	8.62691e-07	3673
ITGA2	VX-11e	-0.0532035	0.255386	3673
ITGA2	VX-680	0.0873519	0.320966	3673
ITGA2	VX-702	0.0401294	0.853749	3673
ITGA2	Veliparib	-0.117733	0.0469431	3673
ITGA2	Vinblastine	0.0838957	0.0451436	3673
ITGA2	Vinorelbine	-0.0040509	0.957895	3673
ITGA2	Vorinostat	0.322424	0	3673
ITGA2	WH-4-023	-0.14987	0.0258357	3673
ITGA2	WZ-1-84	-0.210421	0.00103059	3673
ITGA2	WZ3105	0.25308	7.51273e-14	3673
ITGA2	XAV939	-0.259475	3.03663e-13	3673
ITGA2	XL-184	0.100477	0.0152809	3673
ITGA2	XMD11-85h	-0.0211774	0.919135	3673
ITGA2	XMD13-2	0.276183	0	3673
ITGA2	XMD14-99	0.262702	2.97238e-14	3673
ITGA2	XMD15-27	0.145029	0.000284641	3673
ITGA2	XMD8-85	0.0350254	0.707148	3673
ITGA2	XMD8-92	-0.0212799	0.877239	3673
ITGA2	Y-39983	0.252781	2.47698e-13	3673
ITGA2	YK 4-279	-0.0240766	0.695469	3673
ITGA2	YM155	0.0770951	0.0976329	3673
ITGA2	YM201636	0.316853	0	3673
ITGA2	Z-LLNle-CHO	-0.0469476	0.558094	3673
ITGA2	ZG-10	0.225116	4.7053e-05	3673
ITGA2	ZM-447439	0.141409	0.00049493	3673
ITGA2	ZSTK474	0.231588	1.59351e-11	3673
ITGA2	Zibotentan	0.00316639	0.995968	3673
ITGA2	piperlongumine	-0.0259839	0.590987	3673
ITGA2	rTRAIL	-0.0839079	0.169927	3673
ITGA2	selumetinib	-0.278579	9.32353e-17	3673
LCP1	(5Z)-7-Oxozeaenol	0.00218692	0.96758	3936
LCP1	17-AAG	0.243217	7.03777e-12	3936
LCP1	5-Fluorouracil	-0.302874	3.33092e-19	3936
LCP1	681640	0.02514	0.702337	3936
LCP1	A-443654	-0.0477623	0.794647	3936
LCP1	A-770041	-0.0653101	0.420379	3936
LCP1	AC220	-0.108312	0.00873115	3936
LCP1	AG-014699	0.121769	0.00230389	3936
LCP1	AICAR	-0.30747	7.83248e-18	3936
LCP1	AKT inhibitor VIII	0.115571	0.00533348	3936
LCP1	AMG-706	0.10664	0.0294971	3936
LCP1	AP-24534	-0.215376	3.56723e-09	3936
LCP1	AR-42	-0.297696	9.23583e-19	3936
LCP1	AS601245	0.0371685	0.508836	3936
LCP1	AS605240	-0.174798	3.09458e-06	3936
LCP1	AT-7519	-0.378311	4.09794e-31	3936
LCP1	ATRA	-0.169371	2.2839e-05	3936
LCP1	AUY922	-0.0795471	0.0899836	3936
LCP1	AZ628	-0.0164762	0.86128	3936
LCP1	AZD6482	-0.0506914	0.265532	3936
LCP1	AZD7762	-0.263938	3.92313e-13	3936
LCP1	AZD8055	-0.295001	2.21544e-16	3936
LCP1	Afatinib	0.0864043	0.018045	3936
LCP1	Axitinib	-0.0461755	0.382327	3936
LCP1	BAY 61-3606	-0.211431	1.36262e-08	3936
LCP1	BEZ235	-0.0752435	0.0972519	3936
LCP1	BHG712	-0.333568	8.15469e-24	3936
LCP1	BI-2536	-0.0885888	0.349692	3936
LCP1	BIRB 0796	0.123948	0.00660148	3936
LCP1	BIX02189	-0.297834	9.68631e-19	3936
LCP1	BMS-509744	0.0911803	0.295833	3936
LCP1	BMS-536924	0.0216898	0.793268	3936
LCP1	BMS-708163	0.148749	9.5549e-05	3936
LCP1	BMS-754807	0.145161	0.00103727	3936
LCP1	BMS345541	-0.267428	3.05975e-15	3936
LCP1	BX-795	-0.122001	0.00262726	3936
LCP1	BX-912	-0.288153	6.65087e-18	3936
LCP1	Belinostat	-0.279051	6.78893e-16	3936
LCP1	Bexarotene	0.00920391	0.934854	3936
LCP1	Bicalutamide	0.138887	0.000547086	3936
LCP1	Bleomycin	-0.0425753	0.451044	3936
LCP1	Bleomycin (50 uM)	0.11031	0.00200361	3936
LCP1	Bortezomib	-0.0347833	0.703412	3936
LCP1	Bosutinib	-0.142847	0.000687263	3936
LCP1	Bryostatin 1	0.0674771	0.167131	3936
LCP1	CAL-101	-0.30659	8.67772e-20	3936
LCP1	CAY10603	-0.302008	2.17167e-19	3936
LCP1	CCT007093	0.124448	0.00183105	3936
LCP1	CCT018159	-0.0203329	0.732398	3936
LCP1	CEP-701	-0.268131	1.41288e-13	3936
LCP1	CGP-082996	-0.0533459	0.593881	3936
LCP1	CGP-60474	-0.110088	0.14059	3936
LCP1	CH5424802	-0.155033	0.000123932	3936
LCP1	CHIR-99021	0.105728	0.00399388	3936
LCP1	CI-1040	-0.00796023	0.883152	3936
LCP1	CMK	-0.0940162	0.358063	3936
LCP1	CP466722	-0.32114	3.85651e-22	3936
LCP1	CP724714	0.0764713	0.107108	3936
LCP1	CUDC-101	-0.309243	6.94841e-20	3936
LCP1	CX-5461	-0.222881	1.11169e-10	3936
LCP1	Camptothecin	-0.181763	2.22353e-06	3936
LCP1	Cetuximab	0.156168	3.3525e-05	3936
LCP1	Cisplatin	0.0270111	0.617407	3936
LCP1	Crizotinib	-0.0837071	0.485451	3936
LCP1	Cyclopamine	-0.145207	0.0802601	3936
LCP1	Cytarabine	-0.0682139	0.152192	3936
LCP1	DMOG	-0.206617	4.13958e-08	3936
LCP1	Dabrafenib	-0.0280749	0.551132	3936
LCP1	Dasatinib	0.0270513	0.719703	3936
LCP1	Docetaxel	0.162353	8.84854e-06	3936
LCP1	Doxorubicin	-0.0665449	0.244003	3936
LCP1	EHT 1864	0.0770057	0.17186	3936
LCP1	EKB-569	-0.21828	1.10419e-09	3936
LCP1	EX-527	0.051438	0.601331	3936
LCP1	Elesclomol	0.102668	0.0131505	3936
LCP1	Embelin	-0.0213474	0.7631	3936
LCP1	Epothilone B	0.0105071	0.870242	3936
LCP1	Erlotinib	0.180133	0.00573422	3936
LCP1	Etoposide	-0.140884	0.000545159	3936
LCP1	FH535	0.112175	0.00763093	3936
LCP1	FK866	-0.198253	1.15677e-08	3936
LCP1	FMK	-0.103478	0.0534466	3936
LCP1	FR-180204	-0.0985568	0.0273857	3936
LCP1	FTI-277	0.0969026	0.0153297	3936
LCP1	Foretinib	-0.144613	9.1398e-05	3936
LCP1	GDC0449	-0.0833016	0.275822	3936
LCP1	GDC0941	-0.0703029	0.157452	3936
LCP1	GNF-2	-0.00731571	0.985474	3936
LCP1	GSK-650394	-0.00206368	0.983585	3936
LCP1	GSK1070916	-0.243027	1.86004e-12	3936
LCP1	GSK1904529A	0.179786	9.79547e-06	3936
LCP1	GSK2126458	-0.26137	3.40841e-14	3936
LCP1	GSK269962A	0.0131077	0.841161	3936
LCP1	GSK429286A	-0.124022	0.00101933	3936
LCP1	GSK690693	-0.249247	3.65343e-13	3936
LCP1	GW 441756	0.0140232	0.968098	3936
LCP1	GW-2580	0.0127682	0.989269	3936
LCP1	GW843682X	-0.143043	0.054703	3936
LCP1	Gefitinib	0.0449263	0.290743	3936
LCP1	Gemcitabine	-0.139079	0.00101309	3936
LCP1	Genentech Cpd 10	-0.236869	5.29575e-12	3936
LCP1	HG-5-113-01	-0.00890145	0.925037	3936
LCP1	HG-5-88-01	0.0167962	0.932832	3936
LCP1	HG-6-64-1	-0.0972693	0.0214917	3936
LCP1	I-BET-762	-0.379602	1.30677e-31	3936
LCP1	IOX2	0.0858804	0.0957628	3936
LCP1	IPA-3	-0.240869	2.87976e-11	3936
LCP1	Imatinib	-0.10084	0.355972	3936
LCP1	Ispinesib Mesylate	-0.235885	6.55694e-12	3936
LCP1	JNJ-26854165	-0.0726629	0.119499	3936
LCP1	JNK Inhibitor VIII	0.168437	1.5634e-05	3936
LCP1	JNK-9L	-0.133076	0.00332907	3936
LCP1	JQ1	-0.163845	1.7071e-05	3936
LCP1	JQ12	-0.144806	0.00126101	3936
LCP1	JW-7-24-1	-0.335002	3.43431e-24	3936
LCP1	JW-7-52-1	-0.0995726	0.249779	3936
LCP1	KIN001-055	-0.0106467	0.906886	3936
LCP1	KIN001-102	-0.331707	1.00975e-23	3936
LCP1	KIN001-135	0.132668	0.12638	3936
LCP1	KIN001-236	-0.287947	2.21636e-17	3936
LCP1	KIN001-244	-0.280848	1.73293e-16	3936
LCP1	KIN001-260	-0.333951	8.81422e-24	3936
LCP1	KIN001-266	-0.110474	0.00985519	3936
LCP1	KIN001-270	-0.180345	7.1872e-07	3936
LCP1	KU-55933	-0.13742	0.00300524	3936
LCP1	LAQ824	-0.239438	3.9194e-11	3936
LCP1	LFM-A13	0.10941	0.0154255	3936
LCP1	LY317615	-0.169127	9.07639e-06	3936
LCP1	Lapatinib	0.187747	0.00137096	3936
LCP1	Lenalidomide	-0.0605778	0.359678	3936
LCP1	Linifanib	-0.118521	0.00421954	3936
LCP1	Lisitinib	0.0734339	0.183989	3936
LCP1	MG-132	0.000387266	0.998412	3936
LCP1	MK-2206	-0.113917	0.0124404	3936
LCP1	MLN4924	-0.0381504	0.521194	3936
LCP1	MP470	-0.0467114	0.287587	3936
LCP1	MPS-1-IN-1	-0.194671	3.74049e-08	3936
LCP1	MS-275	-0.202167	0.00321069	3936
LCP1	Masitinib	-0.263428	2.16396e-14	3936
LCP1	Methotrexate	-0.430672	2.99158e-38	3936
LCP1	Midostaurin	0.0797893	0.0598622	3936
LCP1	Mitomycin C	-0.123804	0.00433369	3936
LCP1	NG-25	-0.346358	7.29361e-26	3936
LCP1	NPK76-II-72-1	-0.334971	1.96822e-24	3936
LCP1	NSC-207895	-0.0407611	0.381073	3936
LCP1	NSC-87877	0.114	0.023486	3936
LCP1	NU-7441	-0.0652785	0.310841	3936
LCP1	Navitoclax	-0.28782	1.78732e-16	3936
LCP1	Nilotinib	-0.169893	3.5875e-05	3936
LCP1	Nutlin-3a (-)	-0.084642	0.0536089	3936
LCP1	OSI-027	-0.291794	5.93025e-18	3936
LCP1	OSI-930	-0.228513	8.97661e-11	3936
LCP1	OSU-03012	-0.144947	0.000565093	3936
LCP1	Obatoclax Mesylate	-0.141284	0.000513053	3936
LCP1	Olaparib	0.0353951	0.439435	3936
LCP1	PAC-1	-0.241534	5.54382e-11	3936
LCP1	PD-0325901	0.128356	0.000752719	3936
LCP1	PD-0332991	-0.125429	0.00509201	3936
LCP1	PD-173074	0.0423719	0.77593	3936
LCP1	PF-4708671	0.101438	0.199872	3936
LCP1	PF-562271	0.0655526	0.21407	3936
LCP1	PFI-1	-0.13217	0.00136009	3936
LCP1	PHA-665752	0.11716	0.320871	3936
LCP1	PHA-793887	-0.385519	1.08374e-32	3936
LCP1	PI-103	-0.282081	8.45933e-17	3936
LCP1	PIK-93	-0.378017	2.81828e-31	3936
LCP1	PLX4720	0.0402073	0.346946	3936
LCP1	Paclitaxel	-0.0794684	0.429903	3936
LCP1	Parthenolide	-0.163223	0.0692982	3936
LCP1	Pazopanib	0.0857636	0.0783195	3936
LCP1	Phenformin	-0.265719	1.68445e-14	3936
LCP1	Pyrimethamine	-0.144499	0.1387	3936
LCP1	QL-VIII-58	-0.054596	0.484257	3936
LCP1	QL-X-138	-0.288641	1.92795e-17	3936
LCP1	QL-XI-92	-0.293135	2.9101e-18	3936
LCP1	QL-XII-47	-0.182024	6.12075e-07	3936
LCP1	QL-XII-61	-0.190334	0.000589837	3936
LCP1	QS11	-0.0456069	0.464867	3936
LCP1	RDEA119	0.105126	0.00329171	3936
LCP1	RO-3306	0.123925	0.00201549	3936
LCP1	Rapamycin	-0.111914	0.257201	3936
LCP1	Roscovitine	-0.0360572	0.857267	3936
LCP1	Ruxolitinib	-0.158693	5.5189e-05	3936
LCP1	S-Trityl-L-cysteine	-0.206369	0.00281845	3936
LCP1	SB 216763	0.146246	0.001141	3936
LCP1	SB 505124	0.0785942	0.209434	3936
LCP1	SB52334	0.0701531	0.108331	3936
LCP1	SB590885	0.0615955	0.20266	3936
LCP1	SGC0946	0.125469	0.00418276	3936
LCP1	SL 0101-1	0.0497902	0.507408	3936
LCP1	SN-38	-0.168386	8.35507e-06	3936
LCP1	SNX-2112	-0.329329	5.65633e-23	3936
LCP1	STF-62247	-0.206311	1.4617e-08	3936
LCP1	Salubrinal	-0.145369	0.0515147	3936
LCP1	Saracatinib	0.0336548	0.715304	3936
LCP1	Shikonin	-0.136566	0.00197489	3936
LCP1	Sorafenib	-0.103316	0.24456	3936
LCP1	Sunitinib	-0.22421	0.000215341	3936
LCP1	T0901317	-0.167812	5.63958e-06	3936
LCP1	TAE684	0.00737957	0.965372	3936
LCP1	TAK-715	-0.299357	6.78992e-19	3936
LCP1	TG101348	-0.331807	9.99005e-24	3936
LCP1	TGX221	0.103661	0.100793	3936
LCP1	THZ-2-102-1	-0.316548	5.05846e-21	3936
LCP1	THZ-2-49	-0.328142	1.54924e-22	3936
LCP1	TL-1-85	-0.34121	4.92816e-25	3936
LCP1	TL-2-105	-0.191497	4.86548e-08	3936
LCP1	TPCA-1	-0.369829	7.91735e-30	3936
LCP1	TW 37	-0.00377867	0.951593	3936
LCP1	Talazoparib	-0.0389317	0.405844	3936
LCP1	Tamoxifen	-0.0213688	0.880081	3936
LCP1	Temozolomide	-0.112952	0.0184996	3936
LCP1	Temsirolimus	-0.169375	2.2816e-05	3936
LCP1	Thapsigargin	0.0520518	0.39174	3936
LCP1	Tipifarnib	-0.0479807	0.454266	3936
LCP1	Tivozanib	-0.0639399	0.217427	3936
LCP1	Trametinib	0.141771	7.3112e-05	3936
LCP1	Tubastatin A	-0.314799	3.34932e-21	3936
LCP1	UNC0638	-0.291099	5.79322e-19	3936
LCP1	UNC1215	0.158002	0.000436066	3936
LCP1	VNLG/124	-0.234806	3.0336e-11	3936
LCP1	VX-11e	-0.0595504	0.193297	3936
LCP1	VX-680	-0.136014	0.0850867	3936
LCP1	VX-702	-0.0432998	0.833912	3936
LCP1	Veliparib	0.0669333	0.295896	3936
LCP1	Vinblastine	-0.214963	1.98336e-08	3936
LCP1	Vinorelbine	-0.0933032	0.0516193	3936
LCP1	Vorinostat	-0.310413	3.47308e-19	3936
LCP1	WH-4-023	0.0368113	0.67037	3936
LCP1	WZ-1-84	0.0911936	0.222071	3936
LCP1	WZ3105	-0.334338	4.55865e-24	3936
LCP1	XAV939	0.173303	2.13718e-06	3936
LCP1	XL-184	-0.122943	0.00226321	3936
LCP1	XMD11-85h	0.00228658	0.992385	3936
LCP1	XMD13-2	-0.303461	1.10166e-19	3936
LCP1	XMD14-99	-0.249965	6.64597e-13	3936
LCP1	XMD15-27	-0.130791	0.00122196	3936
LCP1	XMD8-85	-0.147318	0.0335855	3936
LCP1	XMD8-92	-0.0562093	0.604209	3936
LCP1	Y-39983	-0.251279	3.57772e-13	3936
LCP1	YK 4-279	-0.0794421	0.102496	3936
LCP1	YM155	-0.174561	2.0028e-05	3936
LCP1	YM201636	-0.214926	5.54485e-10	3936
LCP1	Z-LLNle-CHO	-0.243775	4.2194e-05	3936
LCP1	ZG-10	-0.0967787	0.116391	3936
LCP1	ZM-447439	-0.162169	5.5118e-05	3936
LCP1	ZSTK474	-0.30157	2.89937e-19	3936
LCP1	Zibotentan	0.0210322	0.95037	3936
LCP1	piperlongumine	0.0247816	0.611758	3936
LCP1	rTRAIL	0.0315451	0.691249	3936
LCP1	selumetinib	0.0968584	0.00745279	3936
MMP1	(5Z)-7-Oxozeaenol	-0.141873	0.000127335	4312
MMP1	17-AAG	-0.200369	2.20072e-08	4312
MMP1	5-Fluorouracil	0.0786334	0.0316443	4312
MMP1	681640	-0.0970113	0.0788284	4312
MMP1	A-443654	-0.00678858	0.980526	4312
MMP1	A-770041	-0.0406312	0.652755	4312
MMP1	AC220	0.074581	0.0878322	4312
MMP1	AG-014699	-0.0655601	0.117482	4312
MMP1	AICAR	0.0305952	0.473962	4312
MMP1	AKT inhibitor VIII	-0.0453229	0.326601	4312
MMP1	AMG-706	-0.0501013	0.391746	4312
MMP1	AP-24534	0.0513164	0.222103	4312
MMP1	AR-42	0.119886	0.000703763	4312
MMP1	AS601245	-0.130514	0.00308639	4312
MMP1	AS605240	0.0293	0.530025	4312
MMP1	AT-7519	0.0644513	0.0763034	4312
MMP1	ATRA	0.0635951	0.175572	4312
MMP1	AUY922	-0.151446	0.000299831	4312
MMP1	AZ628	-0.195797	0.00169089	4312
MMP1	AZD6482	-0.00940932	0.878179	4312
MMP1	AZD7762	-0.000116734	0.998525	4312
MMP1	AZD8055	0.0729967	0.0644329	4312
MMP1	Afatinib	-0.13768	9.9042e-05	4312
MMP1	Axitinib	0.00834558	0.905571	4312
MMP1	BAY 61-3606	0.0322322	0.461024	4312
MMP1	BEZ235	-0.0882595	0.0459416	4312
MMP1	BHG712	0.0756896	0.0379228	4312
MMP1	BI-2536	-0.0694869	0.487756	4312
MMP1	BIRB 0796	-0.0325945	0.55293	4312
MMP1	BIX02189	0.124165	0.000488517	4312
MMP1	BMS-509744	-0.0642771	0.487044	4312
MMP1	BMS-536924	0.0591405	0.326788	4312
MMP1	BMS-708163	-0.0649525	0.104099	4312
MMP1	BMS-754807	-0.0147876	0.82322	4312
MMP1	BMS345541	0.101797	0.00425678	4312
MMP1	BX-795	-0.020112	0.706519	4312
MMP1	BX-912	0.141244	4.918e-05	4312
MMP1	Belinostat	0.0941871	0.0105134	4312
MMP1	Bexarotene	-0.029185	0.723939	4312
MMP1	Bicalutamide	-0.0698504	0.103009	4312
MMP1	Bleomycin	-0.0845196	0.0840501	4312
MMP1	Bleomycin (50 uM)	-0.230364	2.46245e-11	4312
MMP1	Bortezomib	-0.060544	0.455277	4312
MMP1	Bosutinib	-0.0947553	0.0363037	4312
MMP1	Bryostatin 1	-0.0245871	0.673775	4312
MMP1	CAL-101	0.0928306	0.011914	4312
MMP1	CAY10603	0.0950797	0.00773276	4312
MMP1	CCT007093	-0.0929727	0.0227639	4312
MMP1	CCT018159	-0.132334	0.00250194	4312
MMP1	CEP-701	0.0335034	0.441336	4312
MMP1	CGP-082996	0.013864	0.913873	4312
MMP1	CGP-60474	-0.0421039	0.656221	4312
MMP1	CH5424802	0.0486128	0.390109	4312
MMP1	CHIR-99021	-0.107139	0.00349732	4312
MMP1	CI-1040	-0.207031	5.14124e-08	4312
MMP1	CMK	-0.0166809	0.911577	4312
MMP1	CP466722	0.154179	9.45861e-06	4312
MMP1	CP724714	0.00465497	0.950243	4312
MMP1	CUDC-101	0.0816953	0.0261518	4312
MMP1	CX-5461	0.0570321	0.128416	4312
MMP1	Camptothecin	-0.0590647	0.175471	4312
MMP1	Cetuximab	-0.113008	0.00345753	4312
MMP1	Cisplatin	-0.0945396	0.0353274	4312
MMP1	Crizotinib	0.0338275	0.842407	4312
MMP1	Cyclopamine	0.0753018	0.455533	4312
MMP1	Cytarabine	-0.0425691	0.411051	4312
MMP1	DMOG	0.0558546	0.211625	4312
MMP1	Dabrafenib	-0.124802	0.00132965	4312
MMP1	Dasatinib	-0.100872	0.120536	4312
MMP1	Docetaxel	-0.267494	6.42131e-14	4312
MMP1	Doxorubicin	-0.0887126	0.0968091	4312
MMP1	EHT 1864	0.0222549	0.778568	4312
MMP1	EKB-569	0.0483309	0.240116	4312
MMP1	EX-527	0.0485314	0.629359	4312
MMP1	Elesclomol	-0.11645	0.00442203	4312
MMP1	Embelin	-0.128363	0.00439443	4312
MMP1	Epothilone B	-0.139302	0.00146988	4312
MMP1	Erlotinib	-0.12362	0.0741483	4312
MMP1	Etoposide	-0.0132146	0.823496	4312
MMP1	FH535	-0.0709674	0.115943	4312
MMP1	FK866	0.0873897	0.015931	4312
MMP1	FMK	0.00538506	0.954267	4312
MMP1	FR-180204	0.028765	0.61941	4312
MMP1	FTI-277	-0.108199	0.00632851	4312
MMP1	Foretinib	0.00917226	0.854608	4312
MMP1	GDC0449	-0.0557655	0.525221	4312
MMP1	GDC0941	0.0362277	0.540258	4312
MMP1	GNF-2	0.0347244	0.89803	4312
MMP1	GSK-650394	-0.0935903	0.106548	4312
MMP1	GSK1070916	0.146658	3.6611e-05	4312
MMP1	GSK1904529A	-0.0952241	0.0263927	4312
MMP1	GSK2126458	0.056342	0.14096	4312
MMP1	GSK269962A	-0.0251647	0.670084	4312
MMP1	GSK429286A	0.0731651	0.0683865	4312
MMP1	GSK690693	0.130407	0.000255298	4312
MMP1	GW 441756	0.0547356	0.733451	4312
MMP1	GW-2580	0.0482384	0.852919	4312
MMP1	GW843682X	-0.0326319	0.752205	4312
MMP1	Gefitinib	-0.176571	2.98427e-06	4312
MMP1	Gemcitabine	-0.0969334	0.0278502	4312
MMP1	Genentech Cpd 10	0.120809	0.000730956	4312
MMP1	HG-5-113-01	-0.00704614	0.940384	4312
MMP1	HG-5-88-01	0.0344423	0.84112	4312
MMP1	HG-6-64-1	-0.0247501	0.647074	4312
MMP1	I-BET-762	0.142824	3.4001e-05	4312
MMP1	IOX2	-0.0824195	0.111753	4312
MMP1	IPA-3	0.0192646	0.663659	4312
MMP1	Imatinib	0.0082636	0.972502	4312
MMP1	Ispinesib Mesylate	0.0450793	0.237701	4312
MMP1	JNJ-26854165	-0.109882	0.0114581	4312
MMP1	JNK Inhibitor VIII	-0.106639	0.00834761	4312
MMP1	JNK-9L	-0.0314496	0.611622	4312
MMP1	JQ1	0.0123226	0.81063	4312
MMP1	JQ12	0.00460982	0.948242	4312
MMP1	JW-7-24-1	0.111504	0.00160862	4312
MMP1	JW-7-52-1	-0.107293	0.206654	4312
MMP1	KIN001-055	0.00824333	0.927123	4312
MMP1	KIN001-102	0.170681	7.62424e-07	4312
MMP1	KIN001-135	0.0463128	0.676214	4312
MMP1	KIN001-236	0.109182	0.00256477	4312
MMP1	KIN001-244	0.0852255	0.0198519	4312
MMP1	KIN001-260	0.12657	0.00036104	4312
MMP1	KIN001-266	0.0412949	0.398438	4312
MMP1	KIN001-270	0.0675725	0.0842276	4312
MMP1	KU-55933	0.0259551	0.713688	4312
MMP1	LAQ824	0.026113	0.543982	4312
MMP1	LFM-A13	-0.0275625	0.625063	4312
MMP1	LY317615	0.0643474	0.131513	4312
MMP1	Lapatinib	-0.110133	0.0764883	4312
MMP1	Lenalidomide	-0.0363436	0.645644	4312
MMP1	Linifanib	0.0519877	0.298307	4312
MMP1	Lisitinib	0.0462371	0.464691	4312
MMP1	MG-132	-0.0179529	0.877749	4312
MMP1	MK-2206	0.102581	0.0266933	4312
MMP1	MLN4924	-0.0853117	0.101985	4312
MMP1	MP470	0.111188	0.00743133	4312
MMP1	MPS-1-IN-1	0.0703081	0.0625564	4312
MMP1	MS-275	0.127017	0.0781457	4312
MMP1	Masitinib	0.100574	0.00614811	4312
MMP1	Methotrexate	0.127154	0.000479824	4312
MMP1	Midostaurin	-0.0659395	0.129074	4312
MMP1	Mitomycin C	-0.0326845	0.553709	4312
MMP1	NG-25	0.130254	0.000211767	4312
MMP1	NPK76-II-72-1	0.163438	1.91885e-06	4312
MMP1	NSC-207895	0.0469827	0.300174	4312
MMP1	NSC-87877	-0.0729132	0.162539	4312
MMP1	NU-7441	-0.016063	0.867684	4312
MMP1	Navitoclax	0.184607	2.64888e-07	4312
MMP1	Nilotinib	0.0317812	0.568548	4312
MMP1	Nutlin-3a (-)	0.0348408	0.495027	4312
MMP1	OSI-027	0.0814704	0.024441	4312
MMP1	OSI-930	0.0902837	0.016887	4312
MMP1	OSU-03012	-0.0892166	0.045524	4312
MMP1	Obatoclax Mesylate	-0.0920547	0.0321706	4312
MMP1	Olaparib	-0.0592498	0.171492	4312
MMP1	PAC-1	0.0898067	0.0256088	4312
MMP1	PD-0325901	-0.179097	1.49981e-06	4312
MMP1	PD-0332991	-0.0680144	0.182144	4312
MMP1	PD-173074	0.0615769	0.614896	4312
MMP1	PF-4708671	-0.0526278	0.561957	4312
MMP1	PF-562271	-0.126608	0.00744903	4312
MMP1	PFI-1	0.000548686	0.993747	4312
MMP1	PHA-665752	-0.0582082	0.693172	4312
MMP1	PHA-793887	0.124796	0.000334345	4312
MMP1	PI-103	0.0629657	0.0865387	4312
MMP1	PIK-93	0.136804	8.2915e-05	4312
MMP1	PLX4720	-0.0732427	0.0685341	4312
MMP1	Paclitaxel	-0.0971196	0.30003	4312
MMP1	Parthenolide	0.0729968	0.460667	4312
MMP1	Pazopanib	-0.0383109	0.503995	4312
MMP1	Phenformin	0.111493	0.0021565	4312
MMP1	Pyrimethamine	-0.0347303	0.78599	4312
MMP1	QL-VIII-58	-0.115521	0.0733925	4312
MMP1	QL-X-138	0.114647	0.00142356	4312
MMP1	QL-XI-92	0.107158	0.00267418	4312
MMP1	QL-XII-47	0.0569876	0.156292	4312
MMP1	QL-XII-61	0.124348	0.0348549	4312
MMP1	QS11	-0.0381865	0.552192	4312
MMP1	RDEA119	-0.219914	1.12703e-10	4312
MMP1	RO-3306	-0.164119	3.1839e-05	4312
MMP1	Rapamycin	0.0480488	0.702898	4312
MMP1	Roscovitine	0.0116791	0.959285	4312
MMP1	Ruxolitinib	0.0760544	0.0957499	4312
MMP1	S-Trityl-L-cysteine	0.0302231	0.753553	4312
MMP1	SB 216763	-0.0811802	0.0872435	4312
MMP1	SB 505124	-0.00186401	0.988796	4312
MMP1	SB52334	0.0348431	0.490791	4312
MMP1	SB590885	-0.104249	0.0182105	4312
MMP1	SGC0946	-0.025132	0.677713	4312
MMP1	SL 0101-1	-0.0611557	0.40556	4312
MMP1	SN-38	-0.0820774	0.0448141	4312
MMP1	SNX-2112	-0.00726932	0.864613	4312
MMP1	STF-62247	0.13742	0.000288299	4312
MMP1	Salubrinal	0.0931198	0.244753	4312
MMP1	Saracatinib	-0.072005	0.383147	4312
MMP1	Shikonin	-0.013181	0.839102	4312
MMP1	Sorafenib	0.00467313	0.974911	4312
MMP1	Sunitinib	-0.0513998	0.52068	4312
MMP1	T0901317	0.0655738	0.104143	4312
MMP1	TAE684	0.00298278	0.986548	4312
MMP1	TAK-715	0.117805	0.0009221	4312
MMP1	TG101348	0.134832	0.000117807	4312
MMP1	TGX221	-0.0763165	0.241351	4312
MMP1	THZ-2-102-1	0.11413	0.00137308	4312
MMP1	THZ-2-49	0.110162	0.00234212	4312
MMP1	TL-1-85	0.117314	0.00094163	4312
MMP1	TL-2-105	0.131024	0.000264302	4312
MMP1	TPCA-1	0.158303	4.56847e-06	4312
MMP1	TW 37	-0.0739874	0.0837677	4312
MMP1	Talazoparib	-0.0432068	0.349416	4312
MMP1	Tamoxifen	0.0185867	0.90044	4312
MMP1	Temozolomide	0.0238035	0.772203	4312
MMP1	Temsirolimus	-0.0775618	0.0853511	4312
MMP1	Thapsigargin	-0.145856	0.00169476	4312
MMP1	Tipifarnib	-0.062203	0.292839	4312
MMP1	Tivozanib	0.0301744	0.633362	4312
MMP1	Trametinib	-0.251794	3.31849e-13	4312
MMP1	Tubastatin A	0.124965	0.00038047	4312
MMP1	UNC0638	0.100483	0.00404096	4312
MMP1	UNC1215	-0.0463966	0.361186	4312
MMP1	VNLG/124	0.075624	0.0582746	4312
MMP1	VX-11e	-0.0855689	0.0478357	4312
MMP1	VX-680	0.0375676	0.721355	4312
MMP1	VX-702	0.0104168	0.974367	4312
MMP1	Veliparib	-0.0451184	0.508066	4312
MMP1	Vinblastine	-0.0706805	0.098001	4312
MMP1	Vinorelbine	-0.0542115	0.306302	4312
MMP1	Vorinostat	0.123251	0.000685176	4312
MMP1	WH-4-023	-0.0110982	0.909047	4312
MMP1	WZ-1-84	-0.128488	0.0664887	4312
MMP1	WZ3105	0.115395	0.00104069	4312
MMP1	XAV939	-0.0478541	0.230635	4312
MMP1	XL-184	-0.000991069	0.987838	4312
MMP1	XMD11-85h	0.0474566	0.789861	4312
MMP1	XMD13-2	0.10077	0.00469554	4312
MMP1	XMD14-99	0.128238	0.000424497	4312
MMP1	XMD15-27	0.0933538	0.0281634	4312
MMP1	XMD8-85	0.0878744	0.256965	4312
MMP1	XMD8-92	-0.00569488	0.97124	4312
MMP1	Y-39983	0.0892265	0.015549	4312
MMP1	YK 4-279	-0.103366	0.0263568	4312
MMP1	YM155	-0.0116986	0.861332	4312
MMP1	YM201636	0.110624	0.00208172	4312
MMP1	Z-LLNle-CHO	0.0125948	0.893053	4312
MMP1	ZG-10	0.0186737	0.822055	4312
MMP1	ZM-447439	0.0346348	0.485648	4312
MMP1	ZSTK474	0.0966179	0.00727108	4312
MMP1	Zibotentan	0.0113008	0.982063	4312
MMP1	piperlongumine	-0.113025	0.00404236	4312
MMP1	rTRAIL	-0.0842681	0.167663	4312
MMP1	selumetinib	-0.197682	8.95389e-09	4312
MMP10	(5Z)-7-Oxozeaenol	-0.0020491	0.9697	4319
MMP10	17-AAG	-0.114362	0.00188045	4319
MMP10	5-Fluorouracil	0.032785	0.396817	4319
MMP10	681640	-0.119234	0.0259911	4319
MMP10	A-443654	-0.0581779	0.72535	4319
MMP10	A-770041	-0.0272501	0.776391	4319
MMP10	AC220	0.0370167	0.460645	4319
MMP10	AG-014699	-0.035548	0.429062	4319
MMP10	AICAR	-0.0335651	0.429721	4319
MMP10	AKT inhibitor VIII	-0.117886	0.00440059	4319
MMP10	AMG-706	-0.0162113	0.826189	4319
MMP10	AP-24534	0.0582325	0.160389	4319
MMP10	AR-42	0.0692349	0.0565374	4319
MMP10	AS601245	-0.071391	0.151359	4319
MMP10	AS605240	-0.0033331	0.953202	4319
MMP10	AT-7519	-0.0262244	0.494721	4319
MMP10	ATRA	0.0192458	0.736728	4319
MMP10	AUY922	-0.0820274	0.0784254	4319
MMP10	AZ628	-0.0377306	0.656781	4319
MMP10	AZD6482	0.0456743	0.327403	4319
MMP10	AZD7762	0.0161604	0.728212	4319
MMP10	AZD8055	0.00191658	0.968909	4319
MMP10	Afatinib	-0.289701	3.41218e-18	4319
MMP10	Axitinib	-0.0361171	0.516452	4319
MMP10	BAY 61-3606	0.0455164	0.280096	4319
MMP10	BEZ235	-0.068265	0.137707	4319
MMP10	BHG712	0.0932671	0.00954425	4319
MMP10	BI-2536	-0.0914788	0.331345	4319
MMP10	BIRB 0796	-0.061376	0.216746	4319
MMP10	BIX02189	0.0845852	0.0201433	4319
MMP10	BMS-509744	-0.030367	0.769532	4319
MMP10	BMS-536924	-0.00275819	0.978049	4319
MMP10	BMS-708163	-0.0932692	0.0168189	4319
MMP10	BMS-754807	-0.0178828	0.782752	4319
MMP10	BMS345541	-0.0210258	0.594743	4319
MMP10	BX-795	-0.00890687	0.880934	4319
MMP10	BX-912	0.0560544	0.124059	4319
MMP10	Belinostat	0.0606427	0.108779	4319
MMP10	Bexarotene	-0.0203391	0.824265	4319
MMP10	Bicalutamide	-0.0551779	0.210533	4319
MMP10	Bleomycin	-0.0172973	0.797107	4319
MMP10	Bleomycin (50 uM)	-0.16674	1.94651e-06	4319
MMP10	Bortezomib	-0.0158584	0.879388	4319
MMP10	Bosutinib	-0.17292	2.8675e-05	4319
MMP10	Bryostatin 1	0.00981937	0.884229	4319
MMP10	CAL-101	0.0798351	0.0324034	4319
MMP10	CAY10603	0.0827566	0.0212538	4319
MMP10	CCT007093	-0.123657	0.00195068	4319
MMP10	CCT018159	-0.137182	0.00168568	4319
MMP10	CEP-701	0.0227553	0.6145	4319
MMP10	CGP-082996	0.00274905	0.985745	4319
MMP10	CGP-60474	-0.0148219	0.893277	4319
MMP10	CH5424802	0.0360167	0.562937	4319
MMP10	CHIR-99021	0.0712172	0.0605031	4319
MMP10	CI-1040	-0.0936904	0.0223442	4319
MMP10	CMK	0.0258491	0.853836	4319
MMP10	CP466722	0.0984565	0.00570551	4319
MMP10	CP724714	-0.0469022	0.379694	4319
MMP10	CUDC-101	0.0132764	0.749943	4319
MMP10	CX-5461	0.0312804	0.42515	4319
MMP10	Camptothecin	-0.0145291	0.785316	4319
MMP10	Cetuximab	-0.154428	4.1282e-05	4319
MMP10	Cisplatin	-0.0473185	0.343011	4319
MMP10	Crizotinib	0.0480819	0.753655	4319
MMP10	Cyclopamine	0.0530912	0.635142	4319
MMP10	Cytarabine	-0.00139509	0.98542	4319
MMP10	DMOG	0.0642754	0.142862	4319
MMP10	Dabrafenib	0.0565511	0.188631	4319
MMP10	Dasatinib	-0.0284996	0.704416	4319
MMP10	Docetaxel	-0.233789	7.99482e-11	4319
MMP10	Doxorubicin	-0.0795302	0.144373	4319
MMP10	EHT 1864	-0.0863334	0.114716	4319
MMP10	EKB-569	-0.0357629	0.400774	4319
MMP10	EX-527	0.0387409	0.720676	4319
MMP10	Elesclomol	-0.124018	0.00229914	4319
MMP10	Embelin	-0.0529102	0.348805	4319
MMP10	Epothilone B	-0.113838	0.0109562	4319
MMP10	Erlotinib	-0.191515	0.00300138	4319
MMP10	Etoposide	-0.0371078	0.46065	4319
MMP10	FH535	-0.0244178	0.658571	4319
MMP10	FK866	0.0382728	0.316651	4319
MMP10	FMK	0.0334689	0.64467	4319
MMP10	FR-180204	0.0441228	0.400722	4319
MMP10	FTI-277	-0.093226	0.0200535	4319
MMP10	Foretinib	0.0129236	0.793737	4319
MMP10	GDC0449	-0.0462786	0.625525	4319
MMP10	GDC0941	-0.0224045	0.733905	4319
MMP10	GNF-2	0.035151	0.89653	4319
MMP10	GSK-650394	-0.101861	0.074208	4319
MMP10	GSK1070916	0.0417256	0.279447	4319
MMP10	GSK1904529A	-0.0794201	0.0687794	4319
MMP10	GSK2126458	0.0146557	0.730395	4319
MMP10	GSK269962A	0.028177	0.62471	4319
MMP10	GSK429286A	0.0238657	0.605018	4319
MMP10	GSK690693	0.0454324	0.237259	4319
MMP10	GW 441756	-0.012994	0.971824	4319
MMP10	GW-2580	0.0397786	0.91528	4319
MMP10	GW843682X	-0.0540766	0.56	4319
MMP10	Gefitinib	-0.340682	3.8216e-22	4319
MMP10	Gemcitabine	-0.0456437	0.361057	4319
MMP10	Genentech Cpd 10	0.0376387	0.333222	4319
MMP10	HG-5-113-01	-0.0666225	0.339287	4319
MMP10	HG-5-88-01	0.000714584	0.998165	4319
MMP10	HG-6-64-1	-0.00836751	0.890627	4319
MMP10	I-BET-762	0.0853369	0.0153604	4319
MMP10	IOX2	-0.0507927	0.368275	4319
MMP10	IPA-3	0.0379284	0.360564	4319
MMP10	Imatinib	0.041568	0.811281	4319
MMP10	Ispinesib Mesylate	-0.0431881	0.259469	4319
MMP10	JNJ-26854165	-0.066133	0.165394	4319
MMP10	JNK Inhibitor VIII	-0.116264	0.00380001	4319
MMP10	JNK-9L	-0.0513452	0.346784	4319
MMP10	JQ1	0.00140461	0.980644	4319
MMP10	JQ12	0.0179894	0.777401	4319
MMP10	JW-7-24-1	0.0556998	0.129661	4319
MMP10	JW-7-52-1	-0.0462389	0.667877	4319
MMP10	KIN001-055	-0.0452103	0.462552	4319
MMP10	KIN001-102	0.0858494	0.0158625	4319
MMP10	KIN001-135	0.0130514	0.926607	4319
MMP10	KIN001-236	0.0705367	0.0582262	4319
MMP10	KIN001-244	0.100706	0.00537705	4319
MMP10	KIN001-260	0.11673	0.00104783	4319
MMP10	KIN001-266	0.0820924	0.0644726	4319
MMP10	KIN001-270	0.0564531	0.155783	4319
MMP10	KU-55933	-0.0119848	0.883547	4319
MMP10	LAQ824	0.00701454	0.88005	4319
MMP10	LFM-A13	0.00917988	0.885438	4319
MMP10	LY317615	0.0437786	0.328495	4319
MMP10	Lapatinib	-0.18673	0.00146704	4319
MMP10	Lenalidomide	-0.0459478	0.525272	4319
MMP10	Linifanib	0.0411164	0.437718	4319
MMP10	Lisitinib	0.0268619	0.713576	4319
MMP10	MG-132	-0.022831	0.841549	4319
MMP10	MK-2206	0.0158253	0.797762	4319
MMP10	MLN4924	-0.0904034	0.080735	4319
MMP10	MP470	0.0512946	0.236946	4319
MMP10	MPS-1-IN-1	0.0275137	0.49932	4319
MMP10	MS-275	0.0456931	0.609863	4319
MMP10	Masitinib	0.0801199	0.0315725	4319
MMP10	Methotrexate	0.0407452	0.294992	4319
MMP10	Midostaurin	-0.0367139	0.434347	4319
MMP10	Mitomycin C	-0.0549693	0.271223	4319
MMP10	NG-25	0.116036	0.00103922	4319
MMP10	NPK76-II-72-1	0.0901105	0.0106872	4319
MMP10	NSC-207895	0.0561201	0.202241	4319
MMP10	NSC-87877	-0.0500137	0.364427	4319
MMP10	NU-7441	-0.00302023	0.979256	4319
MMP10	Navitoclax	0.11906	0.00118102	4319
MMP10	Nilotinib	0.0296922	0.598683	4319
MMP10	Nutlin-3a (-)	0.0488386	0.31048	4319
MMP10	OSI-027	0.0364231	0.339238	4319
MMP10	OSI-930	0.0845105	0.0261103	4319
MMP10	OSU-03012	-0.0657821	0.161305	4319
MMP10	Obatoclax Mesylate	-0.0453107	0.346158	4319
MMP10	Olaparib	-0.000106633	0.998668	4319
MMP10	PAC-1	0.0838856	0.0385734	4319
MMP10	PD-0325901	-0.0884887	0.0243409	4319
MMP10	PD-0332991	-0.0295507	0.632279	4319
MMP10	PD-173074	0.0354037	0.821838	4319
MMP10	PF-4708671	-0.0561766	0.531943	4319
MMP10	PF-562271	-0.119495	0.0119374	4319
MMP10	PFI-1	-0.028608	0.587808	4319
MMP10	PHA-665752	0.0304911	0.854271	4319
MMP10	PHA-793887	0.0351795	0.342963	4319
MMP10	PI-103	0.0262561	0.502197	4319
MMP10	PIK-93	0.101862	0.00382224	4319
MMP10	PLX4720	0.0549323	0.185442	4319
MMP10	Paclitaxel	-0.128309	0.134289	4319
MMP10	Parthenolide	0.0553949	0.601554	4319
MMP10	Pazopanib	0.0054991	0.940391	4319
MMP10	Phenformin	0.0252387	0.530715	4319
MMP10	Pyrimethamine	0.04432	0.715384	4319
MMP10	QL-VIII-58	-0.0984085	0.144196	4319
MMP10	QL-X-138	0.0449018	0.240203	4319
MMP10	QL-XI-92	0.0771321	0.033809	4319
MMP10	QL-XII-47	0.00667848	0.890349	4319
MMP10	QL-XII-61	0.112377	0.061248	4319
MMP10	QS11	0.0279218	0.686261	4319
MMP10	RDEA119	-0.0923877	0.010585	4319
MMP10	RO-3306	-0.143957	0.000287122	4319
MMP10	Rapamycin	0.051475	0.680002	4319
MMP10	Roscovitine	0.0665225	0.676979	4319
MMP10	Ruxolitinib	0.039052	0.457979	4319
MMP10	S-Trityl-L-cysteine	-0.0310985	0.744837	4319
MMP10	SB 216763	-0.0102734	0.859694	4319
MMP10	SB 505124	-0.0848774	0.16939	4319
MMP10	SB52334	0.0278597	0.597701	4319
MMP10	SB590885	0.0151623	0.790062	4319
MMP10	SGC0946	-0.00969078	0.888456	4319
MMP10	SL 0101-1	-0.0786761	0.284195	4319
MMP10	SN-38	-0.0180378	0.727909	4319
MMP10	SNX-2112	0.0137624	0.738781	4319
MMP10	STF-62247	0.0929336	0.0171001	4319
MMP10	Salubrinal	0.0409309	0.65729	4319
MMP10	Saracatinib	-0.0747334	0.363262	4319
MMP10	Shikonin	-0.0198659	0.750129	4319
MMP10	Sorafenib	0.0517038	0.651278	4319
MMP10	Sunitinib	0.0341363	0.686728	4319
MMP10	T0901317	0.0323205	0.460008	4319
MMP10	TAE684	-0.0222032	0.87963	4319
MMP10	TAK-715	0.0146017	0.719096	4319
MMP10	TG101348	0.0939167	0.0084482	4319
MMP10	TGX221	0.0754746	0.246973	4319
MMP10	THZ-2-102-1	0.0443465	0.239981	4319
MMP10	THZ-2-49	0.143081	6.2329e-05	4319
MMP10	TL-1-85	0.102042	0.004356	4319
MMP10	TL-2-105	0.0596465	0.114572	4319
MMP10	TPCA-1	0.107973	0.00213314	4319
MMP10	TW 37	-0.053798	0.23689	4319
MMP10	Talazoparib	0.0113806	0.833215	4319
MMP10	Tamoxifen	-0.0572216	0.577816	4319
MMP10	Temozolomide	0.00579725	0.955338	4319
MMP10	Temsirolimus	-0.0402938	0.433585	4319
MMP10	Thapsigargin	-0.0525187	0.385694	4319
MMP10	Tipifarnib	-0.0473986	0.462021	4319
MMP10	Tivozanib	0.0291489	0.646514	4319
MMP10	Trametinib	-0.110096	0.00246659	4319
MMP10	Tubastatin A	0.0948953	0.00771889	4319
MMP10	UNC0638	0.113968	0.00102267	4319
MMP10	UNC1215	-0.0714097	0.127652	4319
MMP10	VNLG/124	0.0488064	0.246311	4319
MMP10	VX-11e	-0.0365499	0.466555	4319
MMP10	VX-680	-0.0133393	0.915788	4319
MMP10	VX-702	-0.0586392	0.73454	4319
MMP10	Veliparib	-0.0554722	0.396172	4319
MMP10	Vinblastine	-0.0941558	0.022739	4319
MMP10	Vinorelbine	-0.124504	0.0068405	4319
MMP10	Vorinostat	0.00871299	0.831772	4319
MMP10	WH-4-023	-0.0257109	0.778238	4319
MMP10	WZ-1-84	-0.15849	0.018457	4319
MMP10	WZ3105	0.0190457	0.626018	4319
MMP10	XAV939	-0.0760678	0.049075	4319
MMP10	XL-184	0.0112843	0.843925	4319
MMP10	XMD11-85h	0.0250858	0.900288	4319
MMP10	XMD13-2	0.0130515	0.748474	4319
MMP10	XMD14-99	0.0757772	0.0441028	4319
MMP10	XMD15-27	0.0400965	0.411344	4319
MMP10	XMD8-85	0.0975425	0.197968	4319
MMP10	XMD8-92	0.00752526	0.962116	4319
MMP10	Y-39983	0.0854873	0.0208549	4319
MMP10	YK 4-279	-0.119188	0.00883234	4319
MMP10	YM155	-0.0157841	0.807321	4319
MMP10	YM201636	0.0941604	0.00942288	4319
MMP10	Z-LLNle-CHO	0.00291035	0.975703	4319
MMP10	ZG-10	-0.0204494	0.803122	4319
MMP10	ZM-447439	-0.0211187	0.692414	4319
MMP10	ZSTK474	0.0608761	0.0997477	4319
MMP10	Zibotentan	0.0179781	0.958205	4319
MMP10	piperlongumine	-0.00371935	0.950988	4319
MMP10	rTRAIL	0.0156325	0.866366	4319
MMP10	selumetinib	-0.0503686	0.189086	4319
MMP12	(5Z)-7-Oxozeaenol	0.0079629	0.877096	4321
MMP12	17-AAG	-0.0346593	0.378188	4321
MMP12	5-Fluorouracil	0.0482762	0.200467	4321
MMP12	681640	-0.144312	0.00509136	4321
MMP12	A-443654	-0.0411408	0.831227	4321
MMP12	A-770041	-0.0332816	0.72164	4321
MMP12	AC220	0.0154832	0.793216	4321
MMP12	AG-014699	-0.00270981	0.960265	4321
MMP12	AICAR	-0.0986882	0.0109123	4321
MMP12	AKT inhibitor VIII	-0.030435	0.534047	4321
MMP12	AMG-706	0.0190932	0.792358	4321
MMP12	AP-24534	0.0204607	0.659285	4321
MMP12	AR-42	0.0886985	0.0133614	4321
MMP12	AS601245	-0.039314	0.47982	4321
MMP12	AS605240	0.0488942	0.260327	4321
MMP12	AT-7519	-0.0141282	0.72279	4321
MMP12	ATRA	0.00661044	0.917417	4321
MMP12	AUY922	-0.0464418	0.374261	4321
MMP12	AZ628	0.0240906	0.786518	4321
MMP12	AZD6482	-0.00719362	0.908044	4321
MMP12	AZD7762	0.0387091	0.363267	4321
MMP12	AZD8055	0.00777636	0.86699	4321
MMP12	Afatinib	-0.117388	0.00103728	4321
MMP12	Axitinib	0.0154078	0.81729	4321
MMP12	BAY 61-3606	0.00269581	0.958776	4321
MMP12	BEZ235	-0.0129465	0.82824	4321
MMP12	BHG712	0.0655544	0.0744786	4321
MMP12	BI-2536	-0.0848957	0.375169	4321
MMP12	BIRB 0796	-0.0187016	0.749582	4321
MMP12	BIX02189	0.0419448	0.272209	4321
MMP12	BMS-509744	-0.00188785	0.988308	4321
MMP12	BMS-536924	-0.0101964	0.917268	4321
MMP12	BMS-708163	0.00753108	0.875046	4321
MMP12	BMS-754807	-0.00944724	0.890653	4321
MMP12	BMS345541	0.0118707	0.77016	4321
MMP12	BX-795	0.0110193	0.850114	4321
MMP12	BX-912	0.0310613	0.41061	4321
MMP12	Belinostat	0.0922057	0.0123522	4321
MMP12	Bexarotene	0.0259204	0.759844	4321
MMP12	Bicalutamide	-0.00404779	0.944146	4321
MMP12	Bleomycin	0.0151633	0.826235	4321
MMP12	Bleomycin (50 uM)	-0.018667	0.63818	4321
MMP12	Bortezomib	-0.0372928	0.679304	4321
MMP12	Bosutinib	-0.113776	0.00921662	4321
MMP12	Bryostatin 1	0.00996571	0.882041	4321
MMP12	CAL-101	0.0384739	0.332801	4321
MMP12	CAY10603	0.0901853	0.0117323	4321
MMP12	CCT007093	-0.0743119	0.0758321	4321
MMP12	CCT018159	-0.0682421	0.153282	4321
MMP12	CEP-701	0.0184836	0.687742	4321
MMP12	CGP-082996	-0.0191061	0.877605	4321
MMP12	CGP-60474	-0.0258979	0.800228	4321
MMP12	CH5424802	0.0219269	0.753794	4321
MMP12	CHIR-99021	0.0693207	0.0682578	4321
MMP12	CI-1040	-0.0334615	0.477654	4321
MMP12	CMK	-0.0168058	0.911105	4321
MMP12	CP466722	0.044631	0.231772	4321
MMP12	CP724714	-0.0100831	0.888206	4321
MMP12	CUDC-101	0.052833	0.161858	4321
MMP12	CX-5461	0.0473883	0.2131	4321
MMP12	Camptothecin	-0.0140455	0.792611	4321
MMP12	Cetuximab	-0.0247765	0.577926	4321
MMP12	Cisplatin	0.0120962	0.843537	4321
MMP12	Crizotinib	0.0116525	0.958143	4321
MMP12	Cyclopamine	0.0268204	0.837105	4321
MMP12	Cytarabine	0.0156556	0.795536	4321
MMP12	DMOG	-0.0173542	0.746865	4321
MMP12	Dabrafenib	0.0499753	0.253213	4321
MMP12	Dasatinib	-0.0478751	0.499037	4321
MMP12	Docetaxel	-0.0976388	0.0087706	4321
MMP12	Doxorubicin	-0.0533696	0.37705	4321
MMP12	EHT 1864	-0.0242863	0.756207	4321
MMP12	EKB-569	0.00202034	0.966904	4321
MMP12	EX-527	0.0385152	0.723547	4321
MMP12	Elesclomol	0.0136577	0.793653	4321
MMP12	Embelin	-0.0222554	0.752209	4321
MMP12	Epothilone B	-0.0549448	0.272341	4321
MMP12	Erlotinib	-0.149752	0.0257325	4321
MMP12	Etoposide	-0.0278691	0.600493	4321
MMP12	FH535	0.0219411	0.694834	4321
MMP12	FK866	-0.00415036	0.921875	4321
MMP12	FMK	0.0246275	0.750225	4321
MMP12	FR-180204	0.033386	0.549701	4321
MMP12	FTI-277	-0.00870145	0.857486	4321
MMP12	Foretinib	0.0371881	0.396085	4321
MMP12	GDC0449	-0.0435216	0.653274	4321
MMP12	GDC0941	-0.0124827	0.861435	4321
MMP12	GNF-2	-0.00594281	0.989208	4321
MMP12	GSK-650394	-0.045553	0.522192	4321
MMP12	GSK1070916	0.0100504	0.810748	4321
MMP12	GSK1904529A	-0.023926	0.639983	4321
MMP12	GSK2126458	0.020098	0.628793	4321
MMP12	GSK269962A	0.0539646	0.276421	4321
MMP12	GSK429286A	0.0514036	0.220558	4321
MMP12	GSK690693	0.0305018	0.440801	4321
MMP12	GW 441756	0.0118057	0.976257	4321
MMP12	GW-2580	0.028523	0.948952	4321
MMP12	GW843682X	-0.0932207	0.25472	4321
MMP12	Gefitinib	-0.198751	1.0865e-07	4321
MMP12	Gemcitabine	-0.0340201	0.519091	4321
MMP12	Genentech Cpd 10	0.0517145	0.173597	4321
MMP12	HG-5-113-01	-0.00561956	0.953161	4321
MMP12	HG-5-88-01	-0.0695323	0.580814	4321
MMP12	HG-6-64-1	0.00603151	0.923911	4321
MMP12	I-BET-762	0.067653	0.0574971	4321
MMP12	IOX2	0.00146138	0.987998	4321
MMP12	IPA-3	0.00996382	0.829701	4321
MMP12	Imatinib	0.0229424	0.902665	4321
MMP12	Ispinesib Mesylate	-0.0286677	0.466287	4321
MMP12	JNJ-26854165	-0.0391644	0.457015	4321
MMP12	JNK Inhibitor VIII	-0.070386	0.093497	4321
MMP12	JNK-9L	-0.013293	0.854353	4321
MMP12	JQ1	-0.0307918	0.498622	4321
MMP12	JQ12	-0.0195675	0.756301	4321
MMP12	JW-7-24-1	0.0182195	0.646263	4321
MMP12	JW-7-52-1	0.00882797	0.949088	4321
MMP12	KIN001-055	-0.0186047	0.816986	4321
MMP12	KIN001-102	0.0400331	0.284176	4321
MMP12	KIN001-135	0.0327569	0.783689	4321
MMP12	KIN001-236	0.0191355	0.641573	4321
MMP12	KIN001-244	0.0255094	0.524327	4321
MMP12	KIN001-260	0.0584104	0.114979	4321
MMP12	KIN001-266	0.0613785	0.182056	4321
MMP12	KIN001-270	0.0253499	0.557989	4321
MMP12	KU-55933	-0.0576732	0.308175	4321
MMP12	LAQ824	-0.0204786	0.642118	4321
MMP12	LFM-A13	0.0275216	0.625414	4321
MMP12	LY317615	0.029893	0.525065	4321
MMP12	Lapatinib	-0.0825821	0.193868	4321
MMP12	Lenalidomide	-0.0264144	0.766005	4321
MMP12	Linifanib	0.0134471	0.83533	4321
MMP12	Lisitinib	-0.00963307	0.914473	4321
MMP12	MG-132	-0.0602624	0.505668	4321
MMP12	MK-2206	0.0359708	0.507772	4321
MMP12	MLN4924	0.0231791	0.716984	4321
MMP12	MP470	0.0655853	0.123321	4321
MMP12	MPS-1-IN-1	0.0387116	0.328293	4321
MMP12	MS-275	-0.00194019	0.98691	4321
MMP12	Masitinib	0.0491442	0.204863	4321
MMP12	Methotrexate	0.0215658	0.59347	4321
MMP12	Midostaurin	0.00788158	0.884645	4321
MMP12	Mitomycin C	-0.0518019	0.305666	4321
MMP12	NG-25	0.0337305	0.379051	4321
MMP12	NPK76-II-72-1	0.0416504	0.257577	4321
MMP12	NSC-207895	0.0402221	0.388882	4321
MMP12	NSC-87877	0.0356798	0.541343	4321
MMP12	NU-7441	0.0084864	0.938723	4321
MMP12	Navitoclax	0.043246	0.267666	4321
MMP12	Nilotinib	0.0194897	0.74743	4321
MMP12	Nutlin-3a (-)	0.00836432	0.89005	4321
MMP12	OSI-027	0.0241469	0.538548	4321
MMP12	OSI-930	0.0427179	0.289501	4321
MMP12	OSU-03012	-0.0478257	0.33521	4321
MMP12	Obatoclax Mesylate	-0.0161378	0.773606	4321
MMP12	Olaparib	0.050607	0.250327	4321
MMP12	PAC-1	0.0251127	0.592652	4321
MMP12	PD-0325901	-0.0226763	0.605851	4321
MMP12	PD-0332991	-0.0343841	0.564221	4321
MMP12	PD-173074	0.0145642	0.94091	4321
MMP12	PF-4708671	-0.0547113	0.545355	4321
MMP12	PF-562271	-0.0676366	0.19781	4321
MMP12	PFI-1	-0.0143559	0.803772	4321
MMP12	PHA-665752	-0.0132163	0.942958	4321
MMP12	PHA-793887	0.0295565	0.43045	4321
MMP12	PI-103	-0.0146102	0.718202	4321
MMP12	PIK-93	0.0482402	0.188157	4321
MMP12	PLX4720	0.0476308	0.257333	4321
MMP12	Paclitaxel	-0.0642711	0.554092	4321
MMP12	Parthenolide	-0.00724713	0.95875	4321
MMP12	Pazopanib	0.00803847	0.909017	4321
MMP12	Phenformin	0.0860517	0.0195606	4321
MMP12	Pyrimethamine	0.0225205	0.87133	4321
MMP12	QL-VIII-58	-0.0340956	0.69002	4321
MMP12	QL-X-138	0.0269085	0.497439	4321
MMP12	QL-XI-92	0.0427661	0.259029	4321
MMP12	QL-XII-47	0.0152231	0.74015	4321
MMP12	QL-XII-61	0.0608794	0.36534	4321
MMP12	QS11	0.0320253	0.632012	4321
MMP12	RDEA119	-0.0283413	0.480331	4321
MMP12	RO-3306	-0.0826853	0.0447979	4321
MMP12	Rapamycin	-0.0331887	0.815045	4321
MMP12	Roscovitine	0.0565258	0.739186	4321
MMP12	Ruxolitinib	0.0379198	0.474691	4321
MMP12	S-Trityl-L-cysteine	-0.0150631	0.885159	4321
MMP12	SB 216763	0.00126983	0.983709	4321
MMP12	SB 505124	0.043966	0.548828	4321
MMP12	SB52334	0.0626911	0.158695	4321
MMP12	SB590885	0.0416466	0.415108	4321
MMP12	SGC0946	-0.0086591	0.902205	4321
MMP12	SL 0101-1	-0.03849	0.624239	4321
MMP12	SN-38	0.00242455	0.966145	4321
MMP12	SNX-2112	0.00595595	0.889103	4321
MMP12	STF-62247	0.0447761	0.280619	4321
MMP12	Salubrinal	-0.0263427	0.793268	4321
MMP12	Saracatinib	-0.105438	0.179689	4321
MMP12	Shikonin	-0.0491729	0.351647	4321
MMP12	Sorafenib	-0.012099	0.931424	4321
MMP12	Sunitinib	-0.0353721	0.675077	4321
MMP12	T0901317	0.0207999	0.649852	4321
MMP12	TAE684	-0.00448347	0.978157	4321
MMP12	TAK-715	0.00568061	0.893701	4321
MMP12	TG101348	0.0514003	0.165163	4321
MMP12	TGX221	0.0434898	0.528363	4321
MMP12	THZ-2-102-1	0.0712845	0.0511896	4321
MMP12	THZ-2-49	0.0791267	0.0318028	4321
MMP12	TL-1-85	0.044589	0.238252	4321
MMP12	TL-2-105	0.0587287	0.120642	4321
MMP12	TPCA-1	0.0471649	0.200221	4321
MMP12	TW 37	0.0253913	0.624343	4321
MMP12	Talazoparib	0.0539183	0.227908	4321
MMP12	Tamoxifen	0.0176777	0.905926	4321
MMP12	Temozolomide	0.0218597	0.793647	4321
MMP12	Temsirolimus	-0.0206359	0.719482	4321
MMP12	Thapsigargin	0.00512884	0.957205	4321
MMP12	Tipifarnib	-0.0151308	0.859745	4321
MMP12	Tivozanib	0.0271269	0.672944	4321
MMP12	Trametinib	-0.0129255	0.761008	4321
MMP12	Tubastatin A	0.0500304	0.175026	4321
MMP12	UNC0638	0.110624	0.00145854	4321
MMP12	UNC1215	7.6188e-05	0.998927	4321
MMP12	VNLG/124	0.0193682	0.682676	4321
MMP12	VX-11e	0.0593871	0.194492	4321
MMP12	VX-680	-0.00504671	0.972316	4321
MMP12	VX-702	-0.00993826	0.976421	4321
MMP12	Veliparib	-0.0243548	0.746765	4321
MMP12	Vinblastine	-0.0567304	0.196603	4321
MMP12	Vinorelbine	-0.038589	0.498571	4321
MMP12	Vorinostat	0.0283558	0.467804	4321
MMP12	WH-4-023	-0.0225814	0.808204	4321
MMP12	WZ-1-84	-0.141856	0.0388848	4321
MMP12	WZ3105	0.0459494	0.214771	4321
MMP12	XAV939	0.00616666	0.894025	4321
MMP12	XL-184	0.0344971	0.484384	4321
MMP12	XMD11-85h	0.023785	0.907548	4321
MMP12	XMD13-2	0.00806593	0.846431	4321
MMP12	XMD14-99	0.0403985	0.310988	4321
MMP12	XMD15-27	0.0348158	0.48608	4321
MMP12	XMD8-85	0.0448949	0.613101	4321
MMP12	XMD8-92	-0.0243104	0.85578	4321
MMP12	Y-39983	0.0409307	0.297774	4321
MMP12	YK 4-279	-0.0347371	0.544807	4321
[truncated: 2,520 more rows]
