# Supplementary material for: Pan-cancer analyses of senescence-related genes in extracellular matrix characterization in cancer
Source: Discov Oncol. 2023 Nov 20;14:208. doi: 10.1007/s12672-023-00828-7 (PMC10660488; doi:10.1007/s12672-023-00828-7)
Supplement: Supplementary file 28 — Supplementary file28 (XLSX 401 KB) [file 12672_2023_828_MOESM28_ESM.xlsx]

## Sheet: SheetName
Table S23 The detailed information about the correlation between gene expression and CTRP drug sensitivity in pan-cancer
symbol	drug	cor	fdr	entrez
FGF2	16-beta-bromoandrosterone	0.101127	0.0284177	2247
FGF2	1S,3R-RSL-3	-0.0287812	0.515816	2247
FGF2	3-Cl-AHPC	0.111302	0.00391606	2247
FGF2	968	0.0271164	0.994522	2247
FGF2	A-804598	-0.0545375	0.731552	2247
FGF2	AA-COCF3	0.144659	0.000374961	2247
FGF2	ABT-199	0.109561	0.0439287	2247
FGF2	ABT-737	0.146822	0.000477164	2247
FGF2	AC55649	0.0188545	0.906569	2247
FGF2	AGK-2	0.0487054	0.900753	2247
FGF2	AM-580	0.04755	0.377531	2247
FGF2	AT-406	0.0413886	0.713948	2247
FGF2	AT13387	0.176765	0.00202728	2247
FGF2	AT7867	-0.00337178	0.948251	2247
FGF2	AZ-3146	0.168114	2.2796e-05	2247
FGF2	AZD1480	0.0596491	0.430415	2247
FGF2	AZD4547	-0.0669724	0.154639	2247
FGF2	AZD6482	0.00278954	0.970678	2247
FGF2	AZD7545	0.083764	0.0495637	2247
FGF2	AZD7762	0.0904126	0.0200915	2247
FGF2	AZD8055	0.0902909	0.0244475	2247
FGF2	B02	0.0914781	0.0240385	2247
FGF2	BCL-LZH-4	0.0313058	0.900023	2247
FGF2	BEC	-0.00893538	0.999979	2247
FGF2	BI-2536	0.147756	6.2693e-05	2247
FGF2	BIBR-1532	0.0875807	0.0494657	2247
FGF2	BIRB-796	0.141451	0.000970561	2247
FGF2	BIX-01294	0.175481	3.93598e-06	2247
FGF2	BMS-195614	0.00214045	0.982881	2247
FGF2	BMS-270394	0.0342866	0.493334	2247
FGF2	BMS-345541	0.194463	3.78914e-07	2247
FGF2	BMS-536924	0.10847	0.0231441	2247
FGF2	BMS-754807	0.144864	0.000435817	2247
FGF2	BRD-A02303741	0.0334682	0.568281	2247
FGF2	BRD-A05715709	-0.0707254	0.625961	2247
FGF2	BRD-A71883111	0.160957	7.7651e-05	2247
FGF2	BRD-A86708339	0.314849	1.83463e-08	2247
FGF2	BRD-A94377914	0.213915	6.4468e-05	2247
FGF2	BRD-K01737880	0.133439	0.518071	2247
FGF2	BRD-K02251932	0.124334	0.00816269	2247
FGF2	BRD-K02492147	-0.0781422	0.167183	2247
FGF2	BRD-K04800985	0.0297692	0.99881	2247
FGF2	BRD-K09344309	0.0240227	0.979191	2247
FGF2	BRD-K09587429	0.00148884	0.98554	2247
FGF2	BRD-K11533227	0.144931	0.000535468	2247
FGF2	BRD-K13999467	0.112039	0.00709734	2247
FGF2	BRD-K14844214	0.0388645	0.61768	2247
FGF2	BRD-K16147474	0.00475512	0.993301	2247
FGF2	BRD-K17060750	-0.0434004	0.411167	2247
FGF2	BRD-K19103580	0.164754	0.000246095	2247
FGF2	BRD-K24690302	0.146351	0.000312746	2247
FGF2	BRD-K26531177	0.130511	0.00124626	2247
FGF2	BRD-K27224038	0.0497693	0.865961	2247
FGF2	BRD-K27986637	0.0591642	0.731213	2247
FGF2	BRD-K28456706	0.154846	0.000107891	2247
FGF2	BRD-K29086754	0.00944908	0.975251	2247
FGF2	BRD-K29313308	0.153074	0.000162643	2247
FGF2	BRD-K30019337	0.0121881	0.980495	2247
FGF2	BRD-K30748066	0.0421571	0.846648	2247
FGF2	BRD-K33199242	0.030456	0.963835	2247
FGF2	BRD-K33514849	0.0253865	0.999288	2247
FGF2	BRD-K34099515	-0.110559	0.853511	2247
FGF2	BRD-K34222889	0.193255	2.20716e-07	2247
FGF2	BRD-K34485477	0.0186759	0.998562	2247
FGF2	BRD-K35604418	0.136725	0.000452186	2247
FGF2	BRD-K37390332	-0.0589919	0.731716	2247
FGF2	BRD-K41334119	-0.00391968	0.996488	2247
FGF2	BRD-K41597374	0.235568	6.02714e-10	2247
FGF2	BRD-K42260513	-0.119943	0.967625	2247
FGF2	BRD-K44224150	0.0737354	0.980541	2247
FGF2	BRD-K45681478	0.174294	2.964e-05	2247
FGF2	BRD-K48334597	0.148516	0.156552	2247
FGF2	BRD-K48477130	0.021274	0.927385	2247
FGF2	BRD-K49290616	0.049479	0.918358	2247
FGF2	BRD-K50799972	0.0778064	0.228287	2247
FGF2	BRD-K51490254	0.0700201	0.101562	2247
FGF2	BRD-K51831558	0.037851	0.622422	2247
FGF2	BRD-K52037352	0.130656	0.0255094	2247
FGF2	BRD-K55116708	0.192066	4.33545e-06	2247
FGF2	BRD-K61166597	0.220208	1.22927e-08	2247
FGF2	BRD-K63431240	0.151991	0.000169703	2247
FGF2	BRD-K64610608	-0.0296554	0.81991	2247
FGF2	BRD-K66453893	0.206966	2.76762e-08	2247
FGF2	BRD-K66532283	0.196126	4.86533e-07	2247
FGF2	BRD-K70511574	0.164046	1.3418e-05	2247
FGF2	BRD-K71781559	-0.0261453	0.993922	2247
FGF2	BRD-K75293299	0.0249143	0.94441	2247
FGF2	BRD-K78574327	-0.0521344	0.970056	2247
FGF2	BRD-K80183349	0.234707	5.53474e-10	2247
FGF2	BRD-K84807411	-0.0350598	0.919549	2247
FGF2	BRD-K85133207	0.13593	0.0012964	2247
FGF2	BRD-K86535717	0.0113022	0.985486	2247
FGF2	BRD-K88742110	0.142238	0.000401797	2247
FGF2	BRD-K90370028	0.028944	0.955042	2247
FGF2	BRD-K92856060	0.109741	0.00728793	2247
FGF2	BRD-K96431673	0.00552869	0.999232	2247
FGF2	BRD-K96970199	0.0167664	0.998764	2247
FGF2	BRD-K97651142	0.128831	0.00155978	2247
FGF2	BRD-K99006945	-0.142349	0.0395265	2247
FGF2	BRD-M00053801	0.0656841	0.509114	2247
FGF2	BRD1378	0.0966234	0.204648	2247
FGF2	BRD1812	0.134519	0.000632172	2247
FGF2	BRD1835	0.122481	0.00646659	2247
FGF2	BRD4132	0.0177239	0.812539	2247
FGF2	BRD5468	0.106819	0.100139	2247
FGF2	BRD6340	0.16053	3.7807e-05	2247
FGF2	BRD8899	-0.0149837	0.911493	2247
FGF2	BRD8958	0.0448368	0.982209	2247
FGF2	BRD9647	0.0225824	0.707499	2247
FGF2	BRD9876	0.035392	0.594464	2247
FGF2	BYL-719	0.189854	0.000488894	2247
FGF2	Bax channel blocker	0.177931	1.9828e-05	2247
FGF2	C6-ceramide	0.051398	0.640182	2247
FGF2	CAL-101	-0.026444	0.707287	2247
FGF2	CAY10576	-0.111662	0.0906439	2247
FGF2	CAY10594	0.118635	0.0249446	2247
FGF2	CAY10618	0.0807106	0.0441791	2247
FGF2	CBB-1007	-0.122186	0.362516	2247
FGF2	CCT036477	0.0515332	0.208938	2247
FGF2	CD-1530	0.0445431	0.434282	2247
FGF2	CD-437	0.17761	2.32385e-06	2247
FGF2	CHIR-99021	0.0710201	0.0960941	2247
FGF2	CHM-1	0.181881	1.02809e-06	2247
FGF2	CI-976	-0.079186	0.517686	2247
FGF2	CID-5951923	-0.0595811	0.464387	2247
FGF2	CIL41	-0.0182327	0.83181	2247
FGF2	CIL55	-0.0944179	0.654934	2247
FGF2	CIL55A	0.140896	0.0159789	2247
FGF2	CIL56	0.0118344	0.867736	2247
FGF2	CIL70	0.0196844	0.772972	2247
FGF2	COL-3	0.24252	3.72307e-08	2247
FGF2	CR-1-31B	0.242111	3.11291e-11	2247
FGF2	Ch-55	0.073252	0.119503	2247
FGF2	Compound 1541A	0.00262031	0.977645	2247
FGF2	Compound 23 citrate	0.339256	7.32548e-20	2247
FGF2	Compound 7d-cis	0.15921	0.00014203	2247
FGF2	DBeQ	0.0648589	0.140351	2247
FGF2	DNMDP	-0.061982	0.368817	2247
FGF2	ELCPK	0.188793	0.000995517	2247
FGF2	ETP-46464	0.115775	0.0237838	2247
FGF2	EX-527	-0.0247204	0.863702	2247
FGF2	FGIN-1-27	-0.0160797	0.922422	2247
FGF2	FQI-1	0.192401	0.000335821	2247
FGF2	FQI-2	0.180504	1.09228e-06	2247
FGF2	FSC231	0.0540782	0.99945	2247
FGF2	GANT-61	0.0956131	0.07077	2247
FGF2	GDC-0879	0.0748088	0.141753	2247
FGF2	GDC-0941	0.187579	4.94107e-06	2247
FGF2	GMX-1778	0.0496859	0.249591	2247
FGF2	GSK-3 inhibitor IX	0.0422887	0.349287	2247
FGF2	GSK-J4	0.390162	0.00616421	2247
FGF2	GSK1059615	0.0651356	0.802807	2247
FGF2	GSK2636771	-0.105905	0.213051	2247
FGF2	GSK4112	0.113075	0.0126808	2247
FGF2	GSK461364	0.116811	0.00225289	2247
FGF2	GSK525762A	0.236202	1.35999e-10	2247
FGF2	GW-405833	0.272634	1.8367e-13	2247
FGF2	GW-843682X	0.157644	7.0703e-05	2247
FGF2	HBX-41108	0.124411	0.0166733	2247
FGF2	HC-067047	0.0861013	0.123144	2247
FGF2	HLI 373	0.140056	0.000471656	2247
FGF2	I-BET151	0.254534	2.76779e-12	2247
FGF2	IC-87114	-0.0882553	0.128498	2247
FGF2	IPR-456	-0.0646907	0.604892	2247
FGF2	ISOX	0.280168	2.52929e-14	2247
FGF2	IU1	0.0398357	0.683454	2247
FGF2	JQ-1	0.289613	1.70728e-15	2247
FGF2	JW-480	0.00170632	0.995518	2247
FGF2	JW-55	-0.0877989	0.493838	2247
FGF2	JW-74	-0.0294489	0.773624	2247
FGF2	KH-CB19	-0.0875896	0.414478	2247
FGF2	KHS101	0.22659	1.46447e-08	2247
FGF2	KPT185	0.19441	9.83584e-06	2247
FGF2	KU 0060648	0.24408	1.74626e-10	2247
FGF2	KU-0063794	0.0936192	0.0211802	2247
FGF2	KU-55933	0.0923962	0.0293443	2247
FGF2	KU-60019	0.197132	2.02841e-07	2247
FGF2	KW-2449	0.0218961	0.603735	2247
FGF2	KX2-391	0.145433	0.000128174	2247
FGF2	Ki8751	-0.0189921	0.714226	2247
FGF2	Ko-143	0.197711	2.86105e-07	2247
FGF2	L-685458	0.115811	0.0299659	2247
FGF2	LE-135	0.0539102	0.229774	2247
FGF2	LRRK2-IN-1	0.283652	9.3232e-11	2247
FGF2	LY-2157299	0.0773725	0.743211	2247
FGF2	LY-2183240	0.120095	0.00146036	2247
FGF2	MG-132	0.16654	0.0267989	2247
FGF2	MGCD-265	0.144976	0.000158528	2247
FGF2	MI-1	0.0690459	0.370243	2247
FGF2	MI-2	0.22431	0.000297616	2247
FGF2	MK-0752	-0.0177796	0.839397	2247
FGF2	MK-1775	0.182241	1.74514e-06	2247
FGF2	MK-2206	0.19061	3.31755e-06	2247
FGF2	ML006	0.0873367	0.0866212	2247
FGF2	ML029	0.229156	2.0683e-08	2247
FGF2	ML031	0.0746351	0.0873735	2247
FGF2	ML050	0.0736273	0.0866209	2247
FGF2	ML083	-0.060671	0.591988	2247
FGF2	ML162	-0.064012	0.133214	2247
FGF2	ML203	0.0357054	0.517213	2247
FGF2	ML210	-0.0502685	0.239941	2247
FGF2	ML239	-0.0498357	0.264015	2247
FGF2	ML258	0.109153	0.284621	2247
FGF2	ML311	0.206805	1.80616e-08	2247
FGF2	ML312	0.00786104	0.997572	2247
FGF2	ML320	0.0212897	0.690409	2247
FGF2	ML334 diastereomer	-0.131229	0.0388499	2247
FGF2	MLN2238	0.0801097	0.0432629	2247
FGF2	MLN2480	0.117269	0.173695	2247
FGF2	MST-312	0.0751297	0.0559886	2247
FGF2	Mdivi-1	0.143496	0.000380341	2247
FGF2	Merck60	0.213579	7.64977e-09	2247
FGF2	N9-isopropylolomoucine	0.208876	1.00904e-07	2247
FGF2	NPC-26	0.0191447	0.893302	2247
FGF2	NSC 74859	0.0543871	0.300866	2247
FGF2	NSC19630	0.196586	1.9898e-05	2247
FGF2	NSC23766	0.159441	4.9172e-05	2247
FGF2	NSC30930	-0.0621552	0.352684	2247
FGF2	NSC48300	0.135391	0.000415942	2247
FGF2	NSC632839	0.141002	0.000204789	2247
FGF2	NSC95397	0.152662	0.000153699	2247
FGF2	NVP-231	0.161293	2.1371e-05	2247
FGF2	NVP-ADW742	0.194945	1.59417e-06	2247
FGF2	NVP-BEZ235	0.115624	0.018564	2247
FGF2	NVP-BSK805	0.134938	0.000537496	2247
FGF2	NVP-TAE684	0.17034	5.3588e-05	2247
FGF2	O-6-benzylguanine	0.0946975	0.421091	2247
FGF2	OSI-027	0.07394	0.0837864	2247
FGF2	OSI-930	0.158283	0.000213401	2247
FGF2	PAC-1	0.248075	8.0104e-11	2247
FGF2	PD 153035	0.181692	0.000251415	2247
FGF2	PD318088	0.142962	0.000651611	2247
FGF2	PDMP	0.198295	7.99048e-07	2247
FGF2	PF-184	0.120801	0.00198894	2247
FGF2	PF-3758309	0.186105	0.00073002	2247
FGF2	PF-4800567 hydrochloride	0.0356315	0.999586	2247
FGF2	PF-543	0.167162	0.000116689	2247
FGF2	PF-573228	0.186755	9.35749e-07	2247
FGF2	PF-750	0.135697	0.0023584	2247
FGF2	PHA-793887	0.25135	5.95588e-12	2247
FGF2	PI-103	0.0258814	0.573185	2247
FGF2	PIK-93	0.116485	0.00414502	2247
FGF2	PL-DI	0.255958	5.40282e-12	2247
FGF2	PLX-4720	-0.0363374	0.649684	2247
FGF2	PRIMA-1	0.186285	1.37239e-06	2247
FGF2	PRIMA-1-Met	0.124412	0.059487	2247
FGF2	PRL-3 inhibitor I	-0.0240777	0.876667	2247
FGF2	PX-12	0.236254	2.05919e-10	2247
FGF2	PYR-41	0.00546516	0.935661	2247
FGF2	QS-11	-0.12485	0.599523	2247
FGF2	QW-BI-011	0.0299073	0.783318	2247
FGF2	R428	0.0908637	0.0727747	2247
FGF2	RAF265	0.0974331	0.0599597	2247
FGF2	RG-108	0.030447	0.547365	2247
FGF2	RITA	0.155263	9.9494e-05	2247
FGF2	RO4929097	0.170547	0.0186627	2247
FGF2	Repligen 136	0.217018	7.56675e-08	2247
FGF2	SB-225002	0.126922	0.000689845	2247
FGF2	SB-431542	0.0560636	0.554483	2247
FGF2	SB-525334	0.12636	0.00558391	2247
FGF2	SB-743921	0.216435	2.74362e-09	2247
FGF2	SCH-529074	0.188005	1.1797e-05	2247
FGF2	SCH-79797	0.201992	7.82177e-08	2247
FGF2	SGX-523	-0.149424	0.00222971	2247
FGF2	SID 26681509	-0.0251171	0.625529	2247
FGF2	SJ-172550	0.0294868	0.822429	2247
FGF2	SKI-II	0.072792	0.102023	2247
FGF2	SMER-3	0.120452	0.00598173	2247
FGF2	SN-38	0.0484957	0.304022	2247
FGF2	SNS-032	0.217282	4.1876e-08	2247
FGF2	SNX-2112	0.17183	3.41052e-06	2247
FGF2	SR-II-138A	0.263198	2.49079e-13	2247
FGF2	SR1001	-0.00139323	0.989748	2247
FGF2	SR8278	0.151577	0.642488	2247
FGF2	SRT-1720	0.106648	0.0137475	2247
FGF2	STF-31	0.0228849	0.615543	2247
FGF2	SU11274	0.122733	0.00202075	2247
FGF2	SZ4TA2	-0.0781893	0.472604	2247
FGF2	StemRegenin 1	0.237457	5.7734e-10	2247
FGF2	TG-100-115	0.0443392	0.417727	2247
FGF2	TG-101348	0.117973	0.00293367	2247
FGF2	TGX-221	-0.055155	0.430063	2247
FGF2	TPCA-1	0.182483	1.4847e-06	2247
FGF2	TW-37	0.137325	0.00053643	2247
FGF2	UNC0321	0.0176722	0.905985	2247
FGF2	UNC0638	0.0959661	0.0219607	2247
FGF2	VAF-347	-0.0902622	0.138299	2247
FGF2	VER-155008	0.164529	4.5566e-05	2247
FGF2	VU0155056	0.0283855	0.942638	2247
FGF2	WAY-362450	-0.00786556	0.998521	2247
FGF2	WP1130	0.127602	0.00130788	2247
FGF2	WZ4002	0.207282	0.000298887	2247
FGF2	WZ8040	0.222383	6.93687e-07	2247
FGF2	XL765	-0.00587777	0.943244	2247
FGF2	YK 4-279	0.205288	2.86093e-08	2247
FGF2	YM-155	0.00836087	0.888136	2247
FGF2	ZSTK474	0.0700426	0.183384	2247
FGF2	abiraterone	-0.0459569	0.77106	2247
FGF2	afatinib	0.31147	5.75345e-15	2247
FGF2	alisertib	0.116293	0.00263041	2247
FGF2	alvocidib	0.232644	3.062e-05	2247
FGF2	apicidin	0.2982	1.53066e-16	2247
FGF2	austocystin D	0.303767	3.14753e-14	2247
FGF2	avicin D	-0.113187	0.155784	2247
FGF2	avrainvillamide	0.173503	0.000196335	2247
FGF2	axitinib	0.0375277	0.368476	2247
FGF2	azacitidine	0.0533215	0.274002	2247
FGF2	bafilomycin A1	0.129885	0.804631	2247
FGF2	barasertib	0.179944	2.20149e-06	2247
FGF2	bardoxolone methyl	0.164562	5.8264e-05	2247
FGF2	belinostat	0.3904	5.07033e-14	2247
FGF2	bendamustine	0.0413328	0.359612	2247
FGF2	betulinic acid	-0.0364078	0.834795	2247
FGF2	bexarotene	0.0899188	0.0355174	2247
FGF2	birinapant	0.0785684	0.181378	2247
FGF2	blebbistatin	-0.0387563	0.962395	2247
FGF2	bleomycin A2	-0.00758903	0.918606	2247
FGF2	bortezomib	0.0865355	0.0302037	2247
FGF2	bosutinib	0.209262	1.00043e-07	2247
FGF2	brefeldin A	0.210367	3.49456e-07	2247
FGF2	brivanib	0.154222	9.7384e-05	2247
FGF2	cabozantinib	0.0444999	0.38122	2247
FGF2	canertinib	0.236108	4.90277e-09	2247
FGF2	cediranib	-0.0381422	0.791303	2247
FGF2	ceranib-2	0.169901	4.77216e-06	2247
FGF2	cerulenin	0.257147	4.81192e-12	2247
FGF2	chlorambucil	0.0838244	0.0348201	2247
FGF2	ciclopirox	0.243374	2.57412e-11	2247
FGF2	ciclosporin	0.145796	0.00282717	2247
FGF2	cimetidine	0.0116133	0.99519	2247
FGF2	clofarabine	0.0942113	0.0130564	2247
FGF2	crizotinib	0.223859	2.43123e-09	2247
FGF2	cucurbitacin I	0.104185	0.0101997	2247
FGF2	curcumin	0.181647	1.50744e-06	2247
FGF2	cyanoquinoline 11	0.204248	0.00942512	2247
FGF2	cyclophosphamide	0.0188419	0.997412	2247
FGF2	cytarabine hydrochloride	0.167266	6.82157e-06	2247
FGF2	cytochalasin B	-0.0299228	0.604038	2247
FGF2	dabrafenib	-0.0488317	0.549579	2247
FGF2	dacarbazine	0.120133	0.00188359	2247
FGF2	daporinad	0.0639773	0.164905	2247
FGF2	darinaparsin	0.0330239	0.657649	2247
FGF2	dasatinib	-0.12115	0.00430078	2247
FGF2	decitabine	0.230253	3.22883e-10	2247
FGF2	dexamethasone	0.0562697	0.193947	2247
FGF2	dinaciclib	0.298421	3.16444e-08	2247
FGF2	docetaxel	0.114249	0.0576058	2247
FGF2	doxorubicin	0.171308	3.22741e-06	2247
FGF2	elocalcitol	0.249208	4.19538e-11	2247
FGF2	entinostat	0.278172	6.04463e-14	2247
FGF2	epigallocatechin-3-monogallate	0.0982861	0.0261013	2247
FGF2	erastin	-0.0131033	0.796823	2247
FGF2	erismodegib	-0.0525565	0.494584	2247
FGF2	erlotinib	0.189947	1.68678e-06	2247
FGF2	etomoxir	0.0593089	0.948445	2247
FGF2	etoposide	0.0980017	0.0105536	2247
FGF2	fingolimod	0.235352	5.77544e-10	2247
FGF2	fluorouracil	0.22411	2.38065e-09	2247
FGF2	fluvastatin	-0.188724	1.2601e-05	2247
FGF2	foretinib	0.0821954	0.0514061	2247
FGF2	fulvestrant	0.0960859	0.784233	2247
FGF2	fumonisin B1	0.0359502	0.572055	2247
FGF2	gefitinib	0.220551	9.8904e-08	2247
FGF2	gemcitabine	0.128289	0.0012555	2247
FGF2	gossypol	0.142233	0.000321625	2247
FGF2	hyperforin	0.0394835	0.670399	2247
FGF2	ibrutinib	0.237577	1.51779e-06	2247
FGF2	ifosfamide	-0.0383717	0.867122	2247
FGF2	imatinib	0.107537	0.00946294	2247
FGF2	importazole	0.116798	0.0385395	2247
FGF2	indisulam	0.191131	7.17274e-07	2247
FGF2	isoevodiamine	0.192071	2.45276e-07	2247
FGF2	isoliquiritigenin	0.110209	0.205803	2247
FGF2	isonicotinohydroxamic acid	-0.0663785	0.95765	2247
FGF2	istradefylline	0.100259	0.466171	2247
FGF2	itraconazole	0.0596137	0.379805	2247
FGF2	lapatinib	0.298977	1.89062e-14	2247
FGF2	lenvatinib	-0.0419646	0.384769	2247
FGF2	leptomycin B	0.20164	3.23578e-08	2247
FGF2	linifanib	0.283836	1.63459e-14	2247
FGF2	linsitinib	0.22582	1.57025e-08	2247
FGF2	lomeguatrib	0.0665077	0.220886	2247
FGF2	lovastatin	-0.171368	5.4938e-05	2247
FGF2	manumycin A	0.12234	0.00129811	2247
FGF2	marinopyrrole A	0.175256	0.000367503	2247
FGF2	masitinib	0.186285	2.39654e-06	2247
FGF2	methotrexate	0.0528736	0.213645	2247
FGF2	methylstat	0.18305	7.8001e-05	2247
FGF2	mitomycin	0.148453	9.4069e-05	2247
FGF2	momelotinib	0.0708191	0.0884881	2247
FGF2	myricetin	-0.0123224	0.933005	2247
FGF2	myriocin	-0.116005	0.821816	2247
FGF2	nakiterpiosin	0.170194	6.40508e-06	2247
FGF2	narciclasine	0.263653	1.36628e-12	2247
FGF2	navitoclax	0.154943	0.00010568	2247
FGF2	necrostatin-1	0.10335	0.0213475	2247
FGF2	necrostatin-7	0.177862	2.2078e-05	2247
FGF2	necrosulfonamide	0.218623	1.70165e-06	2247
FGF2	nelarabine	-0.0066878	0.989084	2247
FGF2	neopeltolide	0.0898829	0.352269	2247
FGF2	neratinib	0.246428	2.76168e-10	2247
FGF2	neuronal differentiation inducer III	0.275267	9.76131e-14	2247
FGF2	niclosamide	-0.0494306	0.281969	2247
FGF2	nilotinib	0.0234155	0.811215	2247
FGF2	nintedanib	0.0400527	0.487395	2247
FGF2	nutlin-3	0.131692	0.000863111	2247
FGF2	obatoclax	0.146872	0.000109625	2247
FGF2	olaparib	0.0596344	0.150083	2247
FGF2	oligomycin A	0.127857	0.00114871	2247
FGF2	omacetaxine mepesuccinate	0.142447	0.00158194	2247
FGF2	ouabain	0.0519749	0.189038	2247
FGF2	paclitaxel	0.161963	2.0161e-05	2247
FGF2	palmostatin B	-0.00322193	0.985618	2247
FGF2	pandacostat	0.156915	0.000601346	2247
FGF2	panobinostat	0.326723	9.21915e-20	2247
FGF2	parbendazole	0.154807	2.7992e-05	2247
FGF2	parthenolide	0.0426695	0.474739	2247
FGF2	pazopanib	0.0478049	0.251197	2247
FGF2	pevonedistat	0.113521	0.00414575	2247
FGF2	phloretin	0.161329	2.6717e-05	2247
FGF2	pifithrin-alpha	-0.0374523	0.569146	2247
FGF2	pifithrin-mu	0.207455	5.06911e-08	2247
FGF2	piperlongumine	0.220668	2.16057e-09	2247
FGF2	pitstop2	0.0214067	0.934413	2247
FGF2	pluripotin	-0.00333308	0.96173	2247
FGF2	procarbazine	0.00072719	0.996851	2247
FGF2	prochlorperazine	0.184552	7.9378e-06	2247
FGF2	purmorphamine	0.0903131	0.0506948	2247
FGF2	pyrazolanthrone	0.081896	0.081419	2247
FGF2	quizartinib	-0.0235083	0.736646	2247
FGF2	regorafenib	0.0197343	0.729757	2247
FGF2	rigosertib	0.133322	0.000576135	2247
FGF2	ruxolitinib	0.0206264	0.668868	2247
FGF2	salermide	0.110959	0.179076	2247
FGF2	saracatinib	0.0718913	0.123842	2247
FGF2	selumetinib	0.129615	0.00295277	2247
FGF2	semagacestat	0.0512116	0.698465	2247
FGF2	serdemetan	0.171725	1.2563e-05	2247
FGF2	sildenafil	0.0149268	0.93047	2247
FGF2	silmitasertib	0.0325297	0.722419	2247
FGF2	simvastatin	-0.138364	0.00690084	2247
FGF2	sirolimus	0.14178	0.000247825	2247
FGF2	sitagliptin	-0.0894954	0.997718	2247
FGF2	skepinone-L	0.227871	0.00011199	2247
FGF2	sorafenib	0.0325566	0.488503	2247
FGF2	sotrastaurin	0.26904	1.49012e-09	2247
FGF2	spautin-1	0.0893831	0.0572286	2247
FGF2	staurosporine	-0.21095	0.0347062	2247
FGF2	sunitinib	0.0828911	0.0408826	2247
FGF2	tacedinaline	0.307044	2.49903e-12	2247
FGF2	tacrolimus	0.0939937	0.025892	2247
FGF2	tamatinib	-0.035333	0.687255	2247
FGF2	tamoxifen	0.104939	0.0656631	2247
FGF2	tandutinib	0.0233322	0.640585	2247
FGF2	tanespimycin	0.0752301	0.137313	2247
FGF2	temozolomide	0.0103474	0.903766	2247
FGF2	temsirolimus	0.0637103	0.327796	2247
FGF2	teniposide	0.122148	0.0243161	2247
FGF2	thalidomide	-0.0123876	0.965434	2247
FGF2	tigecycline	0.0176699	0.802213	2247
FGF2	tipifarnib-P1	0.167333	1.4855e-05	2247
FGF2	tipifarnib-P2	0.145749	0.00711964	2247
FGF2	tivantinib	0.210842	0.000130518	2247
FGF2	tivozanib	-0.0180576	0.754729	2247
FGF2	topotecan	0.127346	0.000679799	2247
FGF2	tosedostat	0.256088	1.39378e-10	2247
FGF2	tozasertib	-0.0380482	0.856422	2247
FGF2	trametinib	0.131986	0.0556652	2247
FGF2	tretinoin	0.13726	0.00057927	2247
FGF2	triazolothiadiazine	0.148629	5.8778e-05	2247
FGF2	trifluoperazine	0.169393	0.000173823	2247
FGF2	triptolide	0.16623	1.5048e-05	2247
FGF2	tubastatin A	0.0918904	0.136814	2247
FGF2	valdecoxib	0.214044	3.39014e-08	2247
FGF2	vandetanib	0.0540124	0.295657	2247
FGF2	veliparib	0.0428795	0.594375	2247
FGF2	vemurafenib	-0.103284	0.0403082	2247
FGF2	vincristine	0.165776	5.32733e-06	2247
FGF2	vorapaxar	0.0635815	0.177482	2247
FGF2	vorinostat	0.321013	1.45839e-18	2247
FGF2	zebularine	0.0971937	0.0142055	2247
ICAM1	16-beta-bromoandrosterone	0.0547281	0.26481	3383
ICAM1	1S,3R-RSL-3	-0.00429509	0.931755	3383
ICAM1	3-Cl-AHPC	0.0314086	0.451899	3383
ICAM1	968	0.00538498	0.999953	3383
ICAM1	A-804598	0.0506462	0.754057	3383
ICAM1	AA-COCF3	0.0215304	0.640143	3383
ICAM1	ABT-199	0.0751815	0.182428	3383
ICAM1	ABT-737	0.0128344	0.80864	3383
ICAM1	AC55649	0.100196	0.359952	3383
ICAM1	AGK-2	0.0580982	0.883709	3383
ICAM1	AM-580	-0.00771106	0.910456	3383
ICAM1	AT-406	-0.0746083	0.450918	3383
ICAM1	AT13387	0.0104155	0.877004	3383
ICAM1	AT7867	0.0881779	0.0314045	3383
ICAM1	AZ-3146	0.0609394	0.155312	3383
ICAM1	AZD1480	0.0610383	0.419175	3383
ICAM1	AZD4547	0.135786	0.00174196	3383
ICAM1	AZD6482	-0.0725274	0.181033	3383
ICAM1	AZD7545	0.000686565	0.990071	3383
ICAM1	AZD7762	-0.0325577	0.434207	3383
ICAM1	AZD8055	0.0416398	0.322247	3383
ICAM1	B02	0.037275	0.385908	3383
ICAM1	BCL-LZH-4	0.0497628	0.827085	3383
ICAM1	BEC	-0.00797015	0.999979	3383
ICAM1	BI-2536	0.09148	0.0151102	3383
ICAM1	BIBR-1532	0.0182182	0.737997	3383
ICAM1	BIRB-796	0.0158126	0.764399	3383
ICAM1	BIX-01294	0.0397171	0.334928	3383
ICAM1	BMS-195614	0.0402617	0.54171	3383
ICAM1	BMS-270394	0.0647948	0.157631	3383
ICAM1	BMS-345541	-0.0197079	0.644624	3383
ICAM1	BMS-536924	-0.0566177	0.290259	3383
ICAM1	BMS-754807	0.117495	0.00517071	3383
ICAM1	BRD-A02303741	-0.0690938	0.190559	3383
ICAM1	BRD-A05715709	-0.0436869	0.78362	3383
ICAM1	BRD-A71883111	0.0489569	0.281281	3383
ICAM1	BRD-A86708339	0.0101448	0.886352	3383
ICAM1	BRD-A94377914	0.00423037	0.950554	3383
ICAM1	BRD-K01737880	-0.0758058	0.745708	3383
ICAM1	BRD-K02251932	0.0585775	0.253091	3383
ICAM1	BRD-K02492147	0.0208322	0.761179	3383
ICAM1	BRD-K04800985	0.0680612	0.99881	3383
ICAM1	BRD-K09344309	0.127016	0.764082	3383
ICAM1	BRD-K09587429	0.0139406	0.859665	3383
ICAM1	BRD-K11533227	0.0477252	0.29371	3383
ICAM1	BRD-K13999467	0.0530393	0.235651	3383
ICAM1	BRD-K14844214	0.0905857	0.147859	3383
ICAM1	BRD-K16147474	-0.030059	0.946588	3383
ICAM1	BRD-K17060750	-0.00869346	0.891921	3383
ICAM1	BRD-K19103580	0.00115952	0.985903	3383
ICAM1	BRD-K24690302	0.0539317	0.221425	3383
ICAM1	BRD-K26531177	-0.0174673	0.707544	3383
ICAM1	BRD-K27224038	-0.0718501	0.787409	3383
ICAM1	BRD-K27986637	-0.0470003	0.795539	3383
ICAM1	BRD-K28456706	0.0887541	0.0325851	3383
ICAM1	BRD-K29086754	-0.151032	0.361128	3383
ICAM1	BRD-K29313308	-0.0355222	0.439164	3383
ICAM1	BRD-K30019337	0.0114451	0.981746	3383
ICAM1	BRD-K30748066	-0.158821	0.374793	3383
ICAM1	BRD-K33199242	-0.00934563	0.991557	3383
ICAM1	BRD-K33514849	-0.019098	0.999288	3383
ICAM1	BRD-K34099515	0.136585	0.82721	3383
ICAM1	BRD-K34222889	0.00547465	0.901123	3383
ICAM1	BRD-K34485477	0.0360029	0.998562	3383
ICAM1	BRD-K35604418	0.0840273	0.0354176	3383
ICAM1	BRD-K37390332	0.0195054	0.956086	3383
ICAM1	BRD-K41334119	-0.00898291	0.995011	3383
ICAM1	BRD-K41597374	0.0544102	0.193032	3383
ICAM1	BRD-K42260513	0.0769626	0.973398	3383
ICAM1	BRD-K44224150	-0.00527768	0.998293	3383
ICAM1	BRD-K45681478	-0.00933422	0.8643	3383
ICAM1	BRD-K48334597	-0.0733462	0.542646	3383
ICAM1	BRD-K48477130	-0.0266339	0.90581	3383
ICAM1	BRD-K49290616	-0.048066	0.920189	3383
ICAM1	BRD-K50799972	-0.0569564	0.405697	3383
ICAM1	BRD-K51490254	0.0966758	0.0211047	3383
ICAM1	BRD-K51831558	0.0173276	0.83622	3383
ICAM1	BRD-K52037352	-0.0218658	0.773451	3383
ICAM1	BRD-K55116708	-0.0356848	0.468149	3383
ICAM1	BRD-K61166597	-0.0646284	0.114841	3383
ICAM1	BRD-K63431240	-0.0757005	0.0785282	3383
ICAM1	BRD-K64610608	0.00776692	0.963165	3383
ICAM1	BRD-K66453893	-0.00874013	0.838213	3383
ICAM1	BRD-K66532283	-0.0806593	0.0478897	3383
ICAM1	BRD-K70511574	0.0176124	0.676714	3383
ICAM1	BRD-K71781559	0.00437799	0.99834	3383
ICAM1	BRD-K75293299	-0.0201709	0.955479	3383
ICAM1	BRD-K78574327	-0.0062529	0.995495	3383
ICAM1	BRD-K80183349	-0.0212208	0.626553	3383
ICAM1	BRD-K84807411	-0.0158651	0.966244	3383
ICAM1	BRD-K85133207	0.0272681	0.572141	3383
ICAM1	BRD-K86535717	-0.0948992	0.749019	3383
ICAM1	BRD-K88742110	0.00617419	0.899342	3383
ICAM1	BRD-K90370028	0.0427053	0.934087	3383
ICAM1	BRD-K92856060	-0.0138595	0.773502	3383
ICAM1	BRD-K96431673	-0.0461004	0.993635	3383
ICAM1	BRD-K96970199	-0.00963809	0.998764	3383
ICAM1	BRD-K97651142	0.0164999	0.725482	3383
ICAM1	BRD-K99006945	-0.0593806	0.427473	3383
ICAM1	BRD-M00053801	0.137085	0.107383	3383
ICAM1	BRD1378	-0.0716805	0.415335	3383
ICAM1	BRD1812	0.0423084	0.32008	3383
ICAM1	BRD1835	0.0230373	0.673306	3383
ICAM1	BRD4132	0.0472496	0.465902	3383
ICAM1	BRD5468	-0.0740324	0.317344	3383
ICAM1	BRD6340	0.00432256	0.92534	3383
ICAM1	BRD8899	0.000777801	0.996648	3383
ICAM1	BRD8958	0.0180661	0.983739	3383
ICAM1	BRD9647	-0.0997192	0.0348309	3383
ICAM1	BRD9876	0.0565963	0.356032	3383
ICAM1	BYL-719	0.104703	0.0835444	3383
ICAM1	Bax channel blocker	0.0224417	0.657064	3383
ICAM1	C6-ceramide	0.0484165	0.66535	3383
ICAM1	CAL-101	-0.113006	0.0246558	3383
ICAM1	CAY10576	-0.00952922	0.920227	3383
ICAM1	CAY10594	-0.0559396	0.336646	3383
ICAM1	CAY10618	0.141133	0.000240057	3383
ICAM1	CBB-1007	0.0162114	0.950575	3383
ICAM1	CCT036477	-0.0568341	0.163461	3383
ICAM1	CD-1530	0.0406609	0.483784	3383
ICAM1	CD-437	0.0582277	0.144672	3383
ICAM1	CHIR-99021	-0.0703946	0.0993399	3383
ICAM1	CHM-1	0.00569612	0.895161	3383
ICAM1	CI-976	0.0400086	0.79339	3383
ICAM1	CID-5951923	0.0460763	0.600079	3383
ICAM1	CIL41	0.040026	0.605843	3383
ICAM1	CIL55	-0.0112847	0.968147	3383
ICAM1	CIL55A	-0.0239582	0.730467	3383
ICAM1	CIL56	0.00162406	0.983444	3383
ICAM1	CIL70	0.0779834	0.191632	3383
ICAM1	COL-3	-0.0667358	0.156185	3383
ICAM1	CR-1-31B	-0.00511121	0.903597	3383
ICAM1	Ch-55	0.0610248	0.207513	3383
ICAM1	Compound 1541A	0.0785973	0.169557	3383
ICAM1	Compound 23 citrate	0.0119359	0.78666	3383
ICAM1	Compound 7d-cis	0.0247638	0.606654	3383
ICAM1	DBeQ	0.0396846	0.385687	3383
ICAM1	DNMDP	-0.0212527	0.804022	3383
ICAM1	ELCPK	0.00777204	0.916367	3383
ICAM1	ETP-46464	0.0270762	0.65985	3383
ICAM1	EX-527	0.104164	0.31857	3383
ICAM1	FGIN-1-27	0.00931307	0.957135	3383
ICAM1	FQI-1	0.00952601	0.884238	3383
ICAM1	FQI-2	0.0321353	0.430967	3383
ICAM1	FSC231	-0.0240115	0.99945	3383
ICAM1	GANT-61	-0.0160359	0.829228	3383
ICAM1	GDC-0879	-0.0772524	0.127027	3383
ICAM1	GDC-0941	0.0160958	0.764252	3383
ICAM1	GMX-1778	0.159801	4.2855e-05	3383
ICAM1	GSK-3 inhibitor IX	-0.0146589	0.766325	3383
ICAM1	GSK-J4	-0.0512119	0.787212	3383
ICAM1	GSK1059615	-0.00568877	0.989357	3383
ICAM1	GSK2636771	-0.093682	0.275301	3383
ICAM1	GSK4112	0.0209463	0.712053	3383
ICAM1	GSK461364	0.0412891	0.304293	3383
ICAM1	GSK525762A	-0.0714974	0.0652318	3383
ICAM1	GW-405833	0.0197878	0.641961	3383
ICAM1	GW-843682X	0.0406575	0.349468	3383
ICAM1	HBX-41108	0.0239748	0.713483	3383
ICAM1	HC-067047	0.0266532	0.701515	3383
ICAM1	HLI 373	0.0382105	0.392203	3383
ICAM1	I-BET151	-0.0480072	0.221181	3383
ICAM1	IC-87114	-0.144072	0.00476251	3383
ICAM1	IPR-456	-0.0147882	0.943228	3383
ICAM1	ISOX	0.0218634	0.602815	3383
ICAM1	IU1	0.0383874	0.69441	3383
ICAM1	JQ-1	-0.00155265	0.971236	3383
ICAM1	JW-480	-0.0534587	0.775439	3383
ICAM1	JW-55	-0.0235021	0.879457	3383
ICAM1	JW-74	-0.0507136	0.572178	3383
ICAM1	KH-CB19	-0.00352491	0.979616	3383
ICAM1	KHS101	0.0566794	0.195417	3383
ICAM1	KPT185	0.0434204	0.369496	3383
ICAM1	KU 0060648	0.0174283	0.704661	3383
ICAM1	KU-0063794	0.0633889	0.126647	3383
ICAM1	KU-55933	-0.0395324	0.391964	3383
ICAM1	KU-60019	-0.00505529	0.912226	3383
ICAM1	KW-2449	0.0816296	0.0361294	3383
ICAM1	KX2-391	0.0524761	0.188448	3383
ICAM1	Ki8751	0.0887211	0.0394363	3383
ICAM1	Ko-143	0.106635	0.00740944	3383
ICAM1	L-685458	0.00616367	0.940996	3383
ICAM1	LE-135	0.028949	0.546215	3383
ICAM1	LRRK2-IN-1	0.0274778	0.580023	3383
ICAM1	LY-2157299	0.148442	0.448566	3383
ICAM1	LY-2183240	0.0377258	0.343765	3383
ICAM1	MG-132	0.0430649	0.645801	3383
ICAM1	MGCD-265	0.0284401	0.501261	3383
ICAM1	MI-1	0.0300488	0.750832	3383
ICAM1	MI-2	0.0677497	0.32625	3383
ICAM1	MK-0752	0.0278663	0.734555	3383
ICAM1	MK-1775	0.00940314	0.835596	3383
ICAM1	MK-2206	0.0415737	0.364704	3383
ICAM1	ML006	0.0106194	0.869308	3383
ICAM1	ML029	0.0159338	0.756334	3383
ICAM1	ML031	0.0431339	0.343858	3383
ICAM1	ML050	0.0266553	0.575663	3383
ICAM1	ML083	0.0334581	0.802514	3383
ICAM1	ML162	-0.00607126	0.905401	3383
ICAM1	ML203	0.0440255	0.412153	3383
ICAM1	ML210	-0.049143	0.251561	3383
ICAM1	ML239	0.0324514	0.489232	3383
ICAM1	ML258	0.0571418	0.578391	3383
ICAM1	ML311	0.0190007	0.648496	3383
ICAM1	ML312	0.0062966	0.99784	3383
ICAM1	ML320	-0.0990129	0.0251595	3383
ICAM1	ML334 diastereomer	0.0136715	0.887875	3383
ICAM1	MLN2238	-0.0758535	0.0565274	3383
ICAM1	MLN2480	0.000871133	0.996718	3383
ICAM1	MST-312	-0.0224089	0.594884	3383
ICAM1	Mdivi-1	-0.0554896	0.200115	3383
ICAM1	Merck60	-0.0874949	0.023008	3383
ICAM1	N9-isopropylolomoucine	-0.0416269	0.332331	3383
ICAM1	NPC-26	-0.0192249	0.893302	3383
ICAM1	NSC 74859	-0.0589018	0.255369	3383
ICAM1	NSC19630	0.052103	0.309254	3383
ICAM1	NSC23766	0.0404633	0.348359	3383
ICAM1	NSC30930	-0.06258	0.349292	3383
ICAM1	NSC48300	-0.0953055	0.0147329	3383
ICAM1	NSC632839	0.0245387	0.555004	3383
ICAM1	NSC95397	-0.0186679	0.679992	3383
ICAM1	NVP-231	0.00499234	0.911938	3383
ICAM1	NVP-ADW742	0.0755499	0.087443	3383
ICAM1	NVP-BEZ235	0.071841	0.15889	3383
ICAM1	NVP-BSK805	-0.0172932	0.701644	3383
ICAM1	NVP-TAE684	0.0855773	0.0594555	3383
ICAM1	O-6-benzylguanine	-0.037711	0.795671	3383
ICAM1	OSI-027	-0.00482643	0.927102	3383
ICAM1	OSI-930	0.0382072	0.418531	3383
ICAM1	PAC-1	0.113874	0.00412469	3383
ICAM1	PD 153035	-0.00249844	0.975506	3383
ICAM1	PD318088	-0.092328	0.0384126	3383
ICAM1	PDMP	0.0285081	0.54511	3383
ICAM1	PF-184	0.000391674	0.993004	3383
ICAM1	PF-3758309	-0.00149708	0.981922	3383
ICAM1	PF-4800567 hydrochloride	-0.0411193	0.999586	3383
ICAM1	PF-543	-0.0422784	0.389828	3383
ICAM1	PF-573228	0.0563511	0.17203	3383
ICAM1	PF-750	0.0843841	0.0696379	3383
ICAM1	PHA-793887	-0.0243586	0.549469	3383
ICAM1	PI-103	0.0173737	0.714849	3383
ICAM1	PIK-93	0.00263852	0.95826	3383
ICAM1	PL-DI	-0.0369272	0.366013	3383
ICAM1	PLX-4720	-0.115266	0.0455935	3383
ICAM1	PRIMA-1	-0.0207004	0.632385	3383
ICAM1	PRIMA-1-Met	0.00824508	0.924539	3383
ICAM1	PRL-3 inhibitor I	0.0659466	0.562616	3383
ICAM1	PX-12	0.0477919	0.230148	3383
ICAM1	PYR-41	0.0546465	0.307952	3383
ICAM1	QS-11	-0.00598617	0.987223	3383
ICAM1	QW-BI-011	0.0292338	0.789121	3383
ICAM1	R428	-0.0030279	0.963138	3383
ICAM1	RAF265	-0.0239744	0.714465	3383
ICAM1	RG-108	0.114744	0.00637655	3383
ICAM1	RITA	0.012963	0.788444	3383
ICAM1	RO4929097	-0.0528937	0.504624	3383
ICAM1	Repligen 136	-0.0316165	0.498701	3383
ICAM1	SB-225002	0.0311492	0.439244	3383
ICAM1	SB-431542	0.0429133	0.6798	3383
ICAM1	SB-525334	0.0817419	0.0921588	3383
ICAM1	SB-743921	0.0665942	0.0825565	3383
ICAM1	SCH-529074	0.0693779	0.141467	3383
ICAM1	SCH-79797	0.0735295	0.0646331	3383
ICAM1	SGX-523	0.0269639	0.695769	3383
ICAM1	SID 26681509	-0.0174289	0.744574	3383
ICAM1	SJ-172550	-0.10282	0.251533	3383
ICAM1	SKI-II	0.0365347	0.450486	3383
ICAM1	SMER-3	0.00756918	0.889854	3383
ICAM1	SN-38	0.000580424	0.991519	3383
ICAM1	SNS-032	-0.0585185	0.16778	3383
ICAM1	SNX-2112	-0.0286105	0.475456	3383
ICAM1	SR-II-138A	0.0138525	0.733278	3383
ICAM1	SR1001	0.00135379	0.989928	3383
ICAM1	SR8278	0.00912275	0.983637	3383
ICAM1	SRT-1720	-0.00585287	0.914863	3383
ICAM1	STF-31	0.107973	0.00711012	3383
ICAM1	SU11274	0.0694113	0.0917085	3383
ICAM1	SZ4TA2	0.0387758	0.769762	3383
ICAM1	StemRegenin 1	-0.0010792	0.981836	3383
ICAM1	TG-100-115	0.057734	0.2667	3383
ICAM1	TG-101348	0.0078229	0.87398	3383
ICAM1	TGX-221	-0.0793123	0.204085	3383
ICAM1	TPCA-1	-0.0267799	0.539087	3383
ICAM1	TW-37	0.0777956	0.0566276	3383
ICAM1	UNC0321	0.0344512	0.774678	3383
ICAM1	UNC0638	0.0658433	0.129598	3383
ICAM1	VAF-347	0.0572532	0.376861	3383
ICAM1	VER-155008	-0.00161609	0.974553	3383
ICAM1	VU0155056	0.0234058	0.955395	3383
ICAM1	WAY-362450	0.0107308	0.998521	3383
ICAM1	WP1130	-0.00232212	0.96042	3383
ICAM1	WZ4002	0.0134224	0.884576	3383
ICAM1	WZ8040	0.0359253	0.520521	3383
ICAM1	XL765	0.0381135	0.544846	3383
ICAM1	YK 4-279	0.02811	0.494777	3383
ICAM1	YM-155	-0.0626189	0.195843	3383
ICAM1	ZSTK474	0.0170324	0.790119	3383
ICAM1	abiraterone	0.0640007	0.665348	3383
ICAM1	afatinib	0.00662328	0.909758	3383
ICAM1	alisertib	0.0844257	0.0320597	3383
ICAM1	alvocidib	-0.0499958	0.414212	3383
ICAM1	apicidin	-0.0119856	0.777635	3383
ICAM1	austocystin D	0.0381616	0.449965	3383
ICAM1	avicin D	-0.0260248	0.815471	3383
ICAM1	avrainvillamide	0.0977815	0.0445029	3383
ICAM1	axitinib	0.154442	4.8438e-05	3383
ICAM1	azacitidine	0.0234632	0.660243	3383
ICAM1	bafilomycin A1	-0.0352976	0.964677	3383
ICAM1	barasertib	0.0997361	0.0115014	3383
ICAM1	bardoxolone methyl	-0.0156022	0.742693	3383
ICAM1	belinostat	0.051437	0.381476	3383
ICAM1	bendamustine	0.10535	0.0127808	3383
ICAM1	betulinic acid	-0.0299046	0.87199	3383
ICAM1	bexarotene	0.0531277	0.233529	3383
ICAM1	birinapant	-0.1601	0.00186027	3383
ICAM1	blebbistatin	-0.054834	0.938225	3383
ICAM1	bleomycin A2	-0.0895262	0.0770005	3383
ICAM1	bortezomib	-0.0514812	0.213784	3383
ICAM1	bosutinib	-0.0728939	0.0785122	3383
ICAM1	brefeldin A	0.0320961	0.508424	3383
ICAM1	brivanib	0.0554796	0.183666	3383
ICAM1	cabozantinib	0.064948	0.175303	3383
ICAM1	canertinib	-0.0181807	0.737372	3383
ICAM1	cediranib	0.0191695	0.905631	3383
ICAM1	ceranib-2	0.0742085	0.055311	3383
ICAM1	cerulenin	0.00795305	0.855867	3383
ICAM1	chlorambucil	-0.00248699	0.955818	3383
ICAM1	ciclopirox	0.0489806	0.207729	3383
ICAM1	ciclosporin	0.010287	0.8816	3383
ICAM1	cimetidine	0.0416689	0.977681	3383
ICAM1	clofarabine	-0.030254	0.452065	3383
ICAM1	crizotinib	0.0476674	0.247023	3383
ICAM1	cucurbitacin I	0.00357146	0.942169	3383
ICAM1	curcumin	-0.0207407	0.628669	3383
ICAM1	cyanoquinoline 11	0.00847555	0.944345	3383
ICAM1	cyclophosphamide	0.0590022	0.993392	3383
ICAM1	cytarabine hydrochloride	0.0666974	0.0843631	3383
ICAM1	cytochalasin B	0.0424603	0.435436	3383
ICAM1	dabrafenib	-0.164391	0.0143686	3383
ICAM1	dacarbazine	-0.0412376	0.314733	3383
ICAM1	daporinad	0.15183	0.000358525	3383
ICAM1	darinaparsin	-0.047555	0.50046	3383
ICAM1	dasatinib	-0.168007	3.8422e-05	3383
ICAM1	decitabine	0.0116531	0.781599	3383
ICAM1	dexamethasone	0.0115881	0.812179	3383
ICAM1	dinaciclib	-2.2676e-05	0.999706	3383
ICAM1	docetaxel	-0.0294073	0.662425	3383
ICAM1	doxorubicin	-0.0286403	0.478022	3383
ICAM1	elocalcitol	0.0362386	0.37751	3383
ICAM1	entinostat	-0.0433336	0.287101	3383
ICAM1	epigallocatechin-3-monogallate	-0.0028457	0.960411	3383
ICAM1	erastin	-0.0061582	0.905711	3383
ICAM1	erismodegib	0.0669433	0.357016	3383
ICAM1	erlotinib	-0.0140788	0.80074	3383
ICAM1	etomoxir	-0.0123718	0.985085	3383
ICAM1	etoposide	-0.0274662	0.504112	3383
ICAM1	fingolimod	0.00141434	0.976226	3383
ICAM1	fluorouracil	0.0174352	0.683698	3383
ICAM1	fluvastatin	-0.0690152	0.177715	3383
ICAM1	foretinib	0.114924	0.00487694	3383
ICAM1	fulvestrant	-0.0292477	0.955693	3383
ICAM1	fumonisin B1	-0.0946475	0.0655114	3383
ICAM1	gefitinib	-0.034302	0.545853	3383
ICAM1	gemcitabine	-0.0120252	0.791272	3383
ICAM1	gossypol	0.0854446	0.0351443	3383
ICAM1	hyperforin	0.00853218	0.953207	3383
ICAM1	ibrutinib	0.100796	0.0667888	3383
ICAM1	ifosfamide	0.0661251	0.732558	3383
ICAM1	imatinib	0.0299994	0.519853	3383
ICAM1	importazole	0.042321	0.517142	3383
ICAM1	indisulam	0.0617975	0.132188	3383
ICAM1	isoevodiamine	0.0301919	0.45813	3383
ICAM1	isoliquiritigenin	0.0923051	0.298734	3383
ICAM1	isonicotinohydroxamic acid	0.0419936	0.988877	3383
ICAM1	istradefylline	-0.0501776	0.769179	3383
ICAM1	itraconazole	-0.047875	0.502073	3383
ICAM1	lapatinib	-0.000655904	0.990961	3383
ICAM1	lenvatinib	0.0875221	0.0439214	3383
ICAM1	leptomycin B	-0.0558848	0.148375	3383
ICAM1	linifanib	0.0482202	0.23398	3383
ICAM1	linsitinib	0.0978374	0.020444	3383
ICAM1	lomeguatrib	0.00651167	0.930187	3383
ICAM1	lovastatin	-0.0928119	0.0478698	3383
ICAM1	manumycin A	-0.0323981	0.425015	3383
ICAM1	marinopyrrole A	0.00499677	0.934177	3383
ICAM1	masitinib	0.0335286	0.456918	3383
ICAM1	methotrexate	-0.0131905	0.775997	3383
ICAM1	methylstat	0.0136028	0.807446	3383
ICAM1	mitomycin	0.0670958	0.0911407	3383
ICAM1	momelotinib	-0.109571	0.00673421	3383
ICAM1	myricetin	0.0663632	0.520069	3383
ICAM1	myriocin	-0.0937037	0.85222	3383
ICAM1	nakiterpiosin	0.0257445	0.540639	3383
ICAM1	narciclasine	0.000615647	0.988854	3383
ICAM1	navitoclax	0.0073583	0.88866	3383
ICAM1	necrostatin-1	-0.0119484	0.831828	3383
ICAM1	necrostatin-7	0.0815773	0.066097	3383
ICAM1	necrosulfonamide	-0.0299888	0.562054	3383
ICAM1	nelarabine	0.0733025	0.66235	3383
ICAM1	neopeltolide	0.0114998	0.925843	3383
ICAM1	neratinib	-0.0100171	0.853714	3383
ICAM1	neuronal differentiation inducer III	0.022554	0.590186	3383
ICAM1	niclosamide	-0.0470316	0.309649	3383
ICAM1	nilotinib	0.0339359	0.70067	3383
ICAM1	nintedanib	0.103553	0.0341534	3383
ICAM1	nutlin-3	0.0425154	0.321737	3383
ICAM1	obatoclax	-0.00944066	0.833827	3383
ICAM1	olaparib	0.0737432	0.0702197	3383
ICAM1	oligomycin A	0.112792	0.00439952	3383
ICAM1	omacetaxine mepesuccinate	0.0386359	0.426646	3383
ICAM1	ouabain	0.0488436	0.218827	3383
ICAM1	paclitaxel	0.0300459	0.473229	3383
ICAM1	palmostatin B	-0.0576945	0.595822	3383
ICAM1	pandacostat	0.0203595	0.694595	3383
ICAM1	panobinostat	0.0561639	0.15133	3383
ICAM1	parbendazole	0.034174	0.387941	3383
ICAM1	parthenolide	0.0918417	0.0835675	3383
ICAM1	pazopanib	0.0411006	0.329291	3383
ICAM1	pevonedistat	-0.0112862	0.806645	3383
ICAM1	phloretin	0.0370475	0.376651	3383
ICAM1	pifithrin-alpha	0.0131405	0.872424	3383
ICAM1	pifithrin-mu	0.00913988	0.842461	3383
ICAM1	piperlongumine	-0.0426809	0.282033	3383
ICAM1	pitstop2	-0.00595686	0.981648	3383
ICAM1	pluripotin	-0.138414	0.00147302	3383
ICAM1	procarbazine	-0.0229551	0.91979	3383
ICAM1	prochlorperazine	-0.000899251	0.98846	3383
ICAM1	purmorphamine	0.0207228	0.69339	3383
ICAM1	pyrazolanthrone	-0.00408868	0.95484	3383
ICAM1	quizartinib	0.0281048	0.676281	3383
ICAM1	regorafenib	0.0317628	0.558915	3383
ICAM1	rigosertib	-0.00643623	0.886096	3383
ICAM1	ruxolitinib	-0.0885756	0.032709	3383
ICAM1	salermide	-0.0553939	0.56736	3383
ICAM1	saracatinib	-0.0520224	0.293834	3383
ICAM1	selumetinib	-0.0928495	0.0425257	3383
ICAM1	semagacestat	-0.00467873	0.983665	3383
ICAM1	serdemetan	0.0300616	0.490038	3383
ICAM1	sildenafil	-0.00465292	0.980196	3383
ICAM1	silmitasertib	0.00906247	0.936334	3383
ICAM1	simvastatin	-0.0690219	0.221393	3383
ICAM1	sirolimus	0.0274221	0.524222	3383
ICAM1	sitagliptin	0.0270103	0.997718	3383
ICAM1	skepinone-L	0.068038	0.291428	3383
ICAM1	sorafenib	0.0658197	0.132891	3383
ICAM1	sotrastaurin	0.0215255	0.674961	3383
ICAM1	spautin-1	-0.0178683	0.753306	3383
ICAM1	staurosporine	-0.116108	0.334867	3383
ICAM1	sunitinib	0.00210736	0.965984	3383
ICAM1	tacedinaline	0.038366	0.441075	3383
ICAM1	tacrolimus	0.00327342	0.951238	3383
ICAM1	tamatinib	-0.0482453	0.558819	3383
ICAM1	tamoxifen	0.0328911	0.655859	3383
ICAM1	tandutinib	0.0519916	0.255963	3383
ICAM1	tanespimycin	0.0581151	0.267898	3383
ICAM1	temozolomide	-0.00251487	0.979284	3383
ICAM1	temsirolimus	-0.000881505	0.990905	3383
ICAM1	teniposide	0.0283028	0.633965	3383
ICAM1	thalidomide	-0.0137521	0.963336	3383
ICAM1	tigecycline	0.0495523	0.445703	3383
ICAM1	tipifarnib-P1	0.0529909	0.192181	3383
ICAM1	tipifarnib-P2	0.0541005	0.360603	3383
ICAM1	tivantinib	0.0528515	0.384579	3383
ICAM1	tivozanib	0.0582725	0.23104	3383
ICAM1	topotecan	0.0140848	0.739189	3383
ICAM1	tosedostat	-0.0947124	0.0248562	3383
ICAM1	tozasertib	-0.156392	0.358825	3383
ICAM1	trametinib	-0.172224	0.00899926	3383
ICAM1	tretinoin	0.0521394	0.226048	3383
ICAM1	triazolothiadiazine	0.0287695	0.47271	3383
ICAM1	trifluoperazine	-0.00443857	0.948372	3383
ICAM1	triptolide	-0.0240308	0.571995	3383
ICAM1	tubastatin A	0.0241156	0.736489	3383
ICAM1	valdecoxib	0.0439394	0.295126	3383
ICAM1	vandetanib	-0.0169985	0.784219	3383
ICAM1	veliparib	0.0222756	0.815996	3383
ICAM1	vemurafenib	-0.0593431	0.283798	3383
ICAM1	vincristine	0.0415235	0.283432	3383
ICAM1	vorapaxar	0.0199424	0.714599	3383
ICAM1	vorinostat	-0.00193859	0.964936	3383
ICAM1	zebularine	-0.0168871	0.705425	3383
ICAM3	16-beta-bromoandrosterone	0.00070188	0.990657	3385
ICAM3	1S,3R-RSL-3	-0.105067	0.00832372	3385
ICAM3	3-Cl-AHPC	-0.0250947	0.553462	3385
ICAM3	968	-0.0444288	0.988123	3385
ICAM3	A-804598	0.0827717	0.542063	3385
ICAM3	AA-COCF3	-0.0879915	0.0343576	3385
ICAM3	ABT-199	-0.0416003	0.489546	3385
ICAM3	ABT-737	-0.0399482	0.407452	3385
ICAM3	AC55649	0.0359729	0.783653	3385
ICAM3	AGK-2	0.0246322	0.953516	3385
ICAM3	AM-580	-0.0381398	0.496704	3385
ICAM3	AT-406	-0.0692686	0.49216	3385
ICAM3	AT13387	-0.0548895	0.373838	3385
ICAM3	AT7867	-0.0887625	0.0302214	3385
ICAM3	AZ-3146	0.0226852	0.628929	3385
ICAM3	AZD1480	0.0399736	0.619372	3385
ICAM3	AZD4547	0.00269573	0.965299	3385
ICAM3	AZD6482	-0.0301809	0.640631	3385
ICAM3	AZD7545	-0.101352	0.0158383	3385
ICAM3	AZD7762	-0.129959	0.000640915	3385
ICAM3	AZD8055	-0.102637	0.0100876	3385
ICAM3	B02	-0.035353	0.412458	3385
ICAM3	BCL-LZH-4	-0.0217178	0.934625	3385
ICAM3	BEC	0.0587564	0.999979	3385
ICAM3	BI-2536	-0.056905	0.139273	3385
ICAM3	BIBR-1532	0.0838596	0.0612797	3385
ICAM3	BIRB-796	-0.00954447	0.861452	3385
ICAM3	BIX-01294	-0.0961117	0.0140487	3385
ICAM3	BMS-195614	0.0458678	0.472763	3385
ICAM3	BMS-270394	-0.0322123	0.524295	3385
ICAM3	BMS-345541	-0.112156	0.00412033	3385
ICAM3	BMS-536924	0.040539	0.475813	3385
ICAM3	BMS-754807	0.0884542	0.0430783	3385
ICAM3	BRD-A02303741	-0.0231464	0.707518	3385
ICAM3	BRD-A05715709	0.0217358	0.901987	3385
ICAM3	BRD-A71883111	-0.0542313	0.227164	3385
ICAM3	BRD-A86708339	0.0421558	0.513352	3385
ICAM3	BRD-A94377914	-0.158272	0.00391027	3385
ICAM3	BRD-K01737880	0.144608	0.477541	3385
ICAM3	BRD-K02251932	0.0261874	0.650776	3385
ICAM3	BRD-K02492147	0.143387	0.00915417	3385
ICAM3	BRD-K04800985	0.0167852	0.99881	3385
ICAM3	BRD-K09344309	0.0382888	0.957128	3385
ICAM3	BRD-K09587429	0.0655231	0.29867	3385
ICAM3	BRD-K11533227	-0.107071	0.0122064	3385
ICAM3	BRD-K13999467	-0.0448817	0.323428	3385
ICAM3	BRD-K14844214	-0.0259969	0.757739	3385
ICAM3	BRD-K16147474	0.0167085	0.973844	3385
ICAM3	BRD-K17060750	0.105787	0.0244868	3385
ICAM3	BRD-K19103580	-0.039211	0.460393	3385
ICAM3	BRD-K24690302	-0.105922	0.0107808	3385
ICAM3	BRD-K26531177	-0.0930243	0.0241554	3385
ICAM3	BRD-K27224038	-0.0174489	0.963164	3385
ICAM3	BRD-K27986637	-0.082904	0.59287	3385
ICAM3	BRD-K28456706	-0.01942	0.6853	3385
ICAM3	BRD-K29086754	-0.00901462	0.976508	3385
ICAM3	BRD-K29313308	-0.122744	0.00288304	3385
ICAM3	BRD-K30019337	0.101265	0.695044	3385
ICAM3	BRD-K30748066	-0.113962	0.544944	3385
ICAM3	BRD-K33199242	-0.00677838	0.993616	3385
ICAM3	BRD-K33514849	-0.22476	0.999288	3385
ICAM3	BRD-K34099515	0.161738	0.798217	3385
ICAM3	BRD-K34222889	-0.10173	0.00813944	3385
ICAM3	BRD-K34485477	0.00568869	0.998562	3385
ICAM3	BRD-K35604418	-0.0172719	0.694565	3385
ICAM3	BRD-K37390332	-0.000845558	0.998308	3385
ICAM3	BRD-K41334119	0.0395228	0.95574	3385
ICAM3	BRD-K41597374	-0.0444896	0.294894	3385
ICAM3	BRD-K42260513	0.033353	0.994633	3385
ICAM3	BRD-K44224150	-0.0754553	0.980541	3385
ICAM3	BRD-K45681478	-0.126271	0.00303553	3385
ICAM3	BRD-K48334597	-0.0474989	0.720303	3385
ICAM3	BRD-K48477130	-0.000637587	0.998359	3385
ICAM3	BRD-K49290616	0.144435	0.653105	3385
ICAM3	BRD-K50799972	-0.040643	0.586696	3385
ICAM3	BRD-K51490254	-0.0375658	0.401036	3385
ICAM3	BRD-K51831558	-0.0569961	0.437442	3385
ICAM3	BRD-K52037352	-0.00023756	0.9972	3385
ICAM3	BRD-K55116708	-0.0816151	0.0657563	3385
ICAM3	BRD-K61166597	-0.120231	0.00243861	3385
ICAM3	BRD-K63431240	-0.0423101	0.355547	3385
ICAM3	BRD-K64610608	0.0788055	0.447022	3385
ICAM3	BRD-K66453893	-0.0609558	0.120979	3385
ICAM3	BRD-K66532283	-0.149766	0.000146571	3385
ICAM3	BRD-K70511574	-0.0847258	0.0292869	3385
ICAM3	BRD-K71781559	0.00208634	0.99973	3385
ICAM3	BRD-K75293299	0.0132137	0.971113	3385
ICAM3	BRD-K78574327	0.126993	0.948504	3385
ICAM3	BRD-K80183349	-0.124745	0.00139732	3385
ICAM3	BRD-K84807411	0.0413332	0.89913	3385
ICAM3	BRD-K85133207	-0.0968121	0.0244783	3385
ICAM3	BRD-K86535717	0.0469275	0.905063	3385
ICAM3	BRD-K88742110	-0.00198861	0.968505	3385
ICAM3	BRD-K90370028	0.150794	0.530778	3385
ICAM3	BRD-K92856060	-0.0301262	0.506249	3385
ICAM3	BRD-K96431673	0.0812437	0.985799	3385
ICAM3	BRD-K96970199	0.0175005	0.998764	3385
ICAM3	BRD-K97651142	-0.0741127	0.0788975	3385
ICAM3	BRD-K99006945	-0.107629	0.124336	3385
ICAM3	BRD-M00053801	0.0672167	0.49816	3385
ICAM3	BRD1378	-0.0824049	0.31888	3385
ICAM3	BRD1812	-0.0558411	0.180302	3385
ICAM3	BRD1835	0.0209651	0.704148	3385
ICAM3	BRD4132	0.0442734	0.498249	3385
ICAM3	BRD5468	-0.136847	0.0193789	3385
ICAM3	BRD6340	-0.0813924	0.0421858	3385
ICAM3	BRD8899	-0.000395161	0.998193	3385
ICAM3	BRD8958	0.0488043	0.982209	3385
ICAM3	BRD9647	-0.0305207	0.588426	3385
ICAM3	BRD9876	0.0226297	0.750463	3385
ICAM3	BYL-719	0.128594	0.0270656	3385
ICAM3	Bax channel blocker	-0.08839	0.0447274	3385
ICAM3	C6-ceramide	0.024731	0.853935	3385
ICAM3	CAL-101	-0.0585306	0.320261	3385
ICAM3	CAY10576	0.076975	0.257669	3385
ICAM3	CAY10594	-0.0509286	0.38903	3385
ICAM3	CAY10618	0.039603	0.353667	3385
ICAM3	CBB-1007	0.0698169	0.661119	3385
ICAM3	CCT036477	-0.128056	0.00093835	3385
ICAM3	CD-1530	-0.0379915	0.518767	3385
ICAM3	CD-437	-0.0456041	0.260639	3385
ICAM3	CHIR-99021	-0.14024	0.000525836	3385
ICAM3	CHM-1	-0.0744059	0.0542758	3385
ICAM3	CI-976	0.0447359	0.762574	3385
ICAM3	CID-5951923	0.0285168	0.769072	3385
ICAM3	CIL41	0.0403164	0.603505	3385
ICAM3	CIL55	0.00207503	0.995179	3385
ICAM3	CIL55A	-0.0680093	0.277471	3385
ICAM3	CIL56	-0.117955	0.0474387	3385
ICAM3	CIL70	-0.0601974	0.326496	3385
ICAM3	COL-3	-0.165365	0.000231683	3385
ICAM3	CR-1-31B	-0.0733682	0.053849	3385
ICAM3	Ch-55	0.019455	0.739981	3385
ICAM3	Compound 1541A	-0.00658567	0.941235	3385
ICAM3	Compound 23 citrate	-0.08784	0.0270371	3385
ICAM3	Compound 7d-cis	-0.0322081	0.49408	3385
ICAM3	DBeQ	-0.057542	0.194445	3385
ICAM3	DNMDP	-0.00902349	0.926036	3385
ICAM3	ELCPK	-0.0200792	0.775822	3385
ICAM3	ETP-46464	-0.0681066	0.21214	3385
ICAM3	EX-527	0.0787664	0.443342	3385
ICAM3	FGIN-1-27	0.10635	0.38506	3385
ICAM3	FQI-1	-0.0848216	0.136663	3385
ICAM3	FQI-2	-0.055085	0.162676	3385
ICAM3	FSC231	0.0125075	0.99945	3385
ICAM3	GANT-61	-0.0716499	0.199628	3385
ICAM3	GDC-0879	-0.112734	0.0168319	3385
ICAM3	GDC-0941	-0.0108458	0.845814	3385
ICAM3	GMX-1778	0.0267398	0.560241	3385
ICAM3	GSK-3 inhibitor IX	-0.1162	0.00502441	3385
ICAM3	GSK-J4	-0.00341764	0.986882	3385
ICAM3	GSK1059615	0.0859569	0.723529	3385
ICAM3	GSK2636771	-0.00268617	0.98683	3385
ICAM3	GSK4112	-0.0459999	0.36787	3385
ICAM3	GSK461364	-0.0737865	0.0588435	3385
ICAM3	GSK525762A	-0.129019	0.000632638	3385
ICAM3	GW-405833	-0.0996732	0.010296	3385
ICAM3	GW-843682X	0.00277217	0.956394	3385
ICAM3	HBX-41108	-0.123517	0.0175581	3385
ICAM3	HC-067047	0.00968829	0.903807	3385
ICAM3	HLI 373	-0.0659407	0.121468	3385
ICAM3	I-BET151	-0.147933	7.1724e-05	3385
ICAM3	IC-87114	-0.0825055	0.160047	3385
ICAM3	IPR-456	0.0859886	0.422127	3385
ICAM3	ISOX	-0.0793267	0.0426676	3385
ICAM3	IU1	0.0187601	0.868023	3385
ICAM3	JQ-1	-0.0759983	0.0493838	3385
ICAM3	JW-480	0.0373824	0.839574	3385
ICAM3	JW-55	0.205235	0.090646	3385
ICAM3	JW-74	0.0445432	0.631944	3385
ICAM3	KH-CB19	0.0273068	0.822656	3385
ICAM3	KHS101	-0.00852989	0.863491	3385
ICAM3	KPT185	0.0204571	0.684628	3385
ICAM3	KU 0060648	-0.0611716	0.142572	3385
ICAM3	KU-0063794	-0.0781405	0.0566319	3385
ICAM3	KU-55933	-0.0716596	0.0988672	3385
ICAM3	KU-60019	-0.0811671	0.0415818	3385
ICAM3	KW-2449	-0.0706008	0.0726257	3385
ICAM3	KX2-391	-0.0486843	0.223736	3385
ICAM3	Ki8751	0.0169295	0.747587	3385
ICAM3	Ko-143	-0.0995559	0.0128432	3385
ICAM3	L-685458	-0.0332023	0.618447	3385
ICAM3	LE-135	-0.0516896	0.251006	3385
ICAM3	LRRK2-IN-1	-0.0608178	0.199372	3385
ICAM3	LY-2157299	0.0708426	0.770237	3385
ICAM3	LY-2183240	-0.0731361	0.0576966	3385
ICAM3	MG-132	-0.0593256	0.503749	3385
ICAM3	MGCD-265	-0.0763873	0.0541073	3385
ICAM3	MI-1	0.0684399	0.374906	3385
ICAM3	MI-2	0.00284967	0.973573	3385
ICAM3	MK-0752	0.0283424	0.728474	3385
ICAM3	MK-1775	-0.0528304	0.195686	3385
ICAM3	MK-2206	-0.104408	0.0138999	3385
ICAM3	ML006	-0.0319029	0.578114	3385
ICAM3	ML029	-0.0536117	0.242629	3385
ICAM3	ML031	-0.0174453	0.718913	3385
ICAM3	ML050	-0.0230668	0.630621	3385
ICAM3	ML083	0.0509517	0.666031	3385
ICAM3	ML162	-0.0767741	0.0665533	3385
ICAM3	ML203	-0.0372182	0.497475	3385
ICAM3	ML210	-0.141595	0.000363318	3385
ICAM3	ML239	-0.0718841	0.0937051	3385
ICAM3	ML258	-0.0101263	0.941962	3385
ICAM3	ML311	-0.0439898	0.26907	3385
ICAM3	ML312	0.00256034	0.999187	3385
ICAM3	ML320	-0.119199	0.00613849	3385
ICAM3	ML334 diastereomer	0.084742	0.204867	3385
ICAM3	MLN2238	-0.129646	0.000812119	3385
ICAM3	MLN2480	-0.0255531	0.845203	3385
ICAM3	MST-312	-0.0312361	0.451332	3385
ICAM3	Mdivi-1	-0.0730026	0.084975	3385
ICAM3	Merck60	-0.13421	0.000377359	3385
ICAM3	N9-isopropylolomoucine	-0.0539224	0.201369	3385
ICAM3	NPC-26	0.0127432	0.936284	3385
ICAM3	NSC 74859	-0.0555154	0.288837	3385
ICAM3	NSC19630	-0.103979	0.0312548	3385
ICAM3	NSC23766	-0.12233	0.00215263	3385
ICAM3	NSC30930	0.016118	0.860274	3385
ICAM3	NSC48300	-0.137284	0.000340902	3385
ICAM3	NSC632839	-0.0296921	0.47031	3385
ICAM3	NSC95397	-0.135914	0.000801221	3385
ICAM3	NVP-231	-0.082189	0.0366249	3385
ICAM3	NVP-ADW742	0.014171	0.790407	3385
ICAM3	NVP-BEZ235	-0.0317467	0.560827	3385
ICAM3	NVP-BSK805	-0.107023	0.00677226	3385
ICAM3	NVP-TAE684	0.0136233	0.814648	3385
ICAM3	O-6-benzylguanine	-0.0682625	0.587484	3385
ICAM3	OSI-027	-0.0865826	0.0396648	3385
ICAM3	OSI-930	-0.0414358	0.377564	3385
ICAM3	PAC-1	-0.0223756	0.607608	3385
ICAM3	PD 153035	0.0696385	0.231627	3385
ICAM3	PD318088	-0.0630968	0.183827	3385
ICAM3	PDMP	-0.0839226	0.048566	3385
ICAM3	PF-184	-0.0914034	0.021433	3385
ICAM3	PF-3758309	-0.00883902	0.891174	3385
ICAM3	PF-4800567 hydrochloride	0.00191096	0.999586	3385
ICAM3	PF-543	-0.0295782	0.564108	3385
ICAM3	PF-573228	-0.00825919	0.860968	3385
ICAM3	PF-750	-0.0326602	0.525585	3385
ICAM3	PHA-793887	-0.113283	0.00269306	3385
ICAM3	PI-103	-0.00726613	0.882684	3385
ICAM3	PIK-93	-0.0918411	0.0261615	3385
ICAM3	PL-DI	-0.148858	9.4082e-05	3385
ICAM3	PLX-4720	-0.0767304	0.22838	3385
ICAM3	PRIMA-1	-0.196474	3.33813e-07	3385
ICAM3	PRIMA-1-Met	-0.0764586	0.27987	3385
ICAM3	PRL-3 inhibitor I	0.102233	0.255057	3385
ICAM3	PX-12	-0.169137	7.29109e-06	3385
ICAM3	PYR-41	-0.0136459	0.829856	3385
ICAM3	QS-11	0.0108845	0.977924	3385
ICAM3	QW-BI-011	-0.0930164	0.321152	3385
ICAM3	R428	-0.0365998	0.515476	3385
ICAM3	RAF265	-0.0643029	0.247938	3385
ICAM3	RG-108	0.0321498	0.522045	3385
ICAM3	RITA	-0.148531	0.000203945	3385
ICAM3	RO4929097	-0.137264	0.0583922	3385
ICAM3	Repligen 136	-0.0956582	0.0245545	3385
ICAM3	SB-225002	-0.0401551	0.312095	3385
ICAM3	SB-431542	0.018108	0.887936	3385
ICAM3	SB-525334	0.0762984	0.120186	3385
ICAM3	SB-743921	-0.095267	0.0115672	3385
ICAM3	SCH-529074	-0.0113293	0.844203	3385
ICAM3	SCH-79797	-0.0344832	0.408013	3385
ICAM3	SGX-523	0.0906106	0.0878037	3385
ICAM3	SID 26681509	-0.0284178	0.576329	3385
ICAM3	SJ-172550	-0.0968155	0.28963	3385
ICAM3	SKI-II	-0.0202934	0.694494	3385
ICAM3	SMER-3	-0.112673	0.0104852	3385
ICAM3	SN-38	-0.0239567	0.636459	3385
ICAM3	SNS-032	-0.085845	0.038254	3385
ICAM3	SNX-2112	-0.165884	7.57313e-06	3385
ICAM3	SR-II-138A	-0.0677051	0.0738869	3385
ICAM3	SR1001	0.0630209	0.345692	3385
ICAM3	SR8278	0.0524854	0.895554	3385
ICAM3	SRT-1720	-0.0549252	0.235204	3385
ICAM3	STF-31	0.0176741	0.702529	3385
ICAM3	SU11274	-0.0324007	0.458838	3385
ICAM3	SZ4TA2	0.174284	0.0547031	3385
ICAM3	StemRegenin 1	-0.0409328	0.336913	3385
ICAM3	TG-100-115	-0.012609	0.846683	3385
ICAM3	TG-101348	-0.0409642	0.344319	3385
ICAM3	TGX-221	-0.04207	0.580309	3385
ICAM3	TPCA-1	-0.0641456	0.115109	3385
ICAM3	TW-37	0.00236637	0.961987	3385
ICAM3	UNC0321	0.0210896	0.87973	3385
ICAM3	UNC0638	-0.0573328	0.193824	3385
ICAM3	VAF-347	0.017967	0.819163	3385
ICAM3	VER-155008	-0.0965218	0.0196494	3385
ICAM3	VU0155056	0.0250842	0.949926	3385
ICAM3	WAY-362450	0.013317	0.998521	3385
ICAM3	WP1130	-0.0384262	0.374776	3385
ICAM3	WZ4002	0.0315269	0.699578	3385
ICAM3	WZ8040	0.0464098	0.385159	3385
ICAM3	XL765	0.023818	0.731175	3385
ICAM3	YK 4-279	-0.0416143	0.301067	3385
ICAM3	YM-155	0.0358851	0.487978	3385
ICAM3	ZSTK474	-0.0230793	0.710438	3385
ICAM3	abiraterone	0.113654	0.383383	3385
ICAM3	afatinib	0.013688	0.808539	3385
ICAM3	alisertib	0.00969347	0.828046	3385
ICAM3	alvocidib	-0.030159	0.632409	3385
ICAM3	apicidin	-0.104381	0.00590813	3385
ICAM3	austocystin D	0.023536	0.657109	3385
ICAM3	avicin D	-0.150903	0.0454708	3385
ICAM3	avrainvillamide	-0.0450307	0.387347	3385
ICAM3	axitinib	0.00982338	0.828004	3385
ICAM3	azacitidine	-0.11289	0.0143223	3385
ICAM3	bafilomycin A1	-0.112332	0.833601	3385
ICAM3	barasertib	-0.0317377	0.457657	3385
ICAM3	bardoxolone methyl	-0.0430248	0.331489	3385
ICAM3	belinostat	-0.0153621	0.80742	3385
ICAM3	bendamustine	-0.0864728	0.043582	3385
ICAM3	betulinic acid	0.00102415	0.997442	3385
ICAM3	bexarotene	-0.056603	0.202116	3385
ICAM3	birinapant	-0.173762	0.000494826	3385
ICAM3	blebbistatin	-0.0246913	0.982044	3385
ICAM3	bleomycin A2	0.0751956	0.149617	3385
ICAM3	bortezomib	-0.167195	1.5266e-05	3385
ICAM3	bosutinib	-0.0926474	0.0233259	3385
ICAM3	brefeldin A	0.00758995	0.888841	3385
ICAM3	brivanib	-0.0709744	0.0839451	3385
ICAM3	cabozantinib	-0.00257638	0.968701	3385
ICAM3	canertinib	-0.00190478	0.975807	3385
ICAM3	cediranib	0.0413732	0.771067	3385
ICAM3	ceranib-2	0.0146047	0.731108	3385
ICAM3	cerulenin	-0.109076	0.00483769	3385
ICAM3	chlorambucil	-0.0951257	0.0158439	3385
ICAM3	ciclopirox	-0.0812202	0.0328519	3385
ICAM3	ciclosporin	-0.0531241	0.337338	3385
ICAM3	cimetidine	0.0432594	0.975557	3385
ICAM3	clofarabine	-0.186003	4.31982e-07	3385
ICAM3	crizotinib	-0.0639769	0.112469	3385
ICAM3	cucurbitacin I	-0.0521734	0.224285	3385
ICAM3	curcumin	-0.0838907	0.0323411	3385
ICAM3	cyanoquinoline 11	0.0575626	0.53341	3385
ICAM3	cyclophosphamide	-0.0144712	0.999427	3385
ICAM3	cytarabine hydrochloride	-0.159531	1.8547e-05	3385
ICAM3	cytochalasin B	0.055445	0.287529	3385
ICAM3	dabrafenib	-0.179957	0.00663355	3385
ICAM3	dacarbazine	-0.16395	1.719e-05	3385
ICAM3	daporinad	0.0642736	0.162728	3385
ICAM3	darinaparsin	-0.113169	0.0698642	3385
ICAM3	dasatinib	0.00360797	0.954014	3385
ICAM3	decitabine	-0.151651	4.8438e-05	3385
ICAM3	dexamethasone	-0.072823	0.086796	3385
ICAM3	dinaciclib	-0.0192166	0.764299	3385
ICAM3	docetaxel	-0.00820865	0.90815	3385
ICAM3	doxorubicin	-0.0912262	0.0158275	3385
ICAM3	elocalcitol	-0.150572	9.0974e-05	3385
ICAM3	entinostat	-0.10867	0.00500145	3385
ICAM3	epigallocatechin-3-monogallate	-0.10092	0.0220056	3385
ICAM3	erastin	-0.0112102	0.826972	3385
ICAM3	erismodegib	0.0640705	0.381581	3385
ICAM3	erlotinib	0.0462722	0.33162	3385
ICAM3	etomoxir	-0.0179553	0.97986	3385
ICAM3	etoposide	-0.0854315	0.0268174	3385
ICAM3	fingolimod	-0.126004	0.00127154	3385
ICAM3	fluorouracil	-0.0351738	0.390229	3385
ICAM3	fluvastatin	0.00907789	0.893424	3385
ICAM3	foretinib	0.0273079	0.569172	3385
ICAM3	fulvestrant	-0.0321129	0.949928	3385
ICAM3	fumonisin B1	-0.0592858	0.299404	3385
ICAM3	gefitinib	0.0462256	0.389282	3385
ICAM3	gemcitabine	-0.102643	0.0107315	3385
ICAM3	gossypol	-0.0242895	0.581749	3385
ICAM3	hyperforin	0.116334	0.107777	3385
ICAM3	ibrutinib	0.0665676	0.255772	3385
ICAM3	ifosfamide	-0.00106764	0.997466	3385
ICAM3	imatinib	-0.110088	0.00782772	3385
ICAM3	importazole	-0.0597581	0.328569	3385
ICAM3	indisulam	-0.0880646	0.0284276	3385
ICAM3	isoevodiamine	-0.0200182	0.630347	3385
ICAM3	isoliquiritigenin	-0.13125	0.126055	3385
ICAM3	isonicotinohydroxamic acid	0.097952	0.95765	3385
ICAM3	istradefylline	-0.0126231	0.955972	3385
ICAM3	itraconazole	0.0310064	0.692068	3385
ICAM3	lapatinib	0.0303	0.540165	3385
ICAM3	lenvatinib	0.0381851	0.434736	3385
ICAM3	leptomycin B	-0.0797828	0.0356548	3385
ICAM3	linifanib	-0.0412915	0.31316	3385
ICAM3	linsitinib	-0.0155807	0.756499	3385
ICAM3	lomeguatrib	0.0100775	0.885624	3385
ICAM3	lovastatin	-0.00783769	0.906332	3385
ICAM3	manumycin A	-0.126885	0.000835426	3385
ICAM3	marinopyrrole A	-0.0895869	0.0805274	3385
ICAM3	masitinib	-0.0461978	0.290502	3385
ICAM3	methotrexate	-0.103982	0.0111982	3385
ICAM3	methylstat	-0.0947547	0.0513139	3385
ICAM3	mitomycin	-0.0321841	0.43971	3385
ICAM3	momelotinib	-0.107509	0.0079021	3385
ICAM3	myricetin	0.0525205	0.622917	3385
ICAM3	myriocin	0.150957	0.769697	3385
ICAM3	nakiterpiosin	-0.0467336	0.248317	3385
ICAM3	narciclasine	-0.0967324	0.0126801	3385
ICAM3	navitoclax	-0.0624159	0.149909	3385
ICAM3	necrostatin-1	-0.00150321	0.979892	3385
ICAM3	necrostatin-7	0.0282364	0.574433	3385
ICAM3	necrosulfonamide	-0.127164	0.00696517	3385
ICAM3	nelarabine	-0.00410761	0.993839	3385
ICAM3	neopeltolide	-0.153891	0.0890397	3385
ICAM3	neratinib	-0.0341395	0.47384	3385
ICAM3	neuronal differentiation inducer III	-0.129485	0.000715024	3385
ICAM3	niclosamide	0.00541766	0.92069	3385
ICAM3	nilotinib	0.0261861	0.784958	3385
ICAM3	nintedanib	0.0493226	0.374613	3385
ICAM3	nutlin-3	-0.0934157	0.0208298	3385
ICAM3	obatoclax	-0.00290698	0.95069	3385
ICAM3	olaparib	0.0587064	0.157112	3385
ICAM3	oligomycin A	-0.0434285	0.301182	3385
ICAM3	omacetaxine mepesuccinate	-0.0407167	0.400343	3385
ICAM3	ouabain	-0.0371678	0.358142	3385
ICAM3	paclitaxel	-0.036188	0.381752	3385
ICAM3	palmostatin B	-0.0625561	0.556229	3385
ICAM3	pandacostat	-0.0929617	0.0410476	3385
ICAM3	panobinostat	-0.0858857	0.024897	3385
ICAM3	parbendazole	-0.0860581	0.0228451	3385
ICAM3	parthenolide	-0.00844513	0.904258	3385
ICAM3	pazopanib	-0.0391864	0.353944	3385
ICAM3	pevonedistat	-0.0855131	0.0339418	3385
ICAM3	phloretin	-0.0521347	0.202903	3385
ICAM3	pifithrin-alpha	-0.0194251	0.800943	3385
ICAM3	pifithrin-mu	-0.138149	0.000374885	3385
ICAM3	piperlongumine	-0.183136	8.38759e-07	3385
ICAM3	pitstop2	-0.00125068	0.995658	3385
ICAM3	pluripotin	-0.0994298	0.0282557	3385
ICAM3	procarbazine	-0.00122732	0.995543	3385
ICAM3	prochlorperazine	-0.0461661	0.340745	3385
ICAM3	purmorphamine	-0.0216664	0.678889	3385
ICAM3	pyrazolanthrone	-0.0255579	0.656897	3385
ICAM3	quizartinib	0.0361748	0.573324	3385
ICAM3	regorafenib	0.000263015	0.996996	3385
ICAM3	rigosertib	-0.0761131	0.0563965	3385
ICAM3	ruxolitinib	-0.0628897	0.142866	3385
ICAM3	salermide	-0.00400618	0.977579	3385
ICAM3	saracatinib	-0.0111229	0.855104	3385
ICAM3	selumetinib	-0.0686306	0.153938	3385
ICAM3	semagacestat	0.00454357	0.983801	3385
ICAM3	serdemetan	-0.0792548	0.0526808	3385
ICAM3	sildenafil	0.0036283	0.985344	3385
ICAM3	silmitasertib	0.0673295	0.398965	3385
ICAM3	simvastatin	0.00234876	0.977096	3385
ICAM3	sirolimus	-0.126363	0.00115999	3385
ICAM3	sitagliptin	-0.0156521	0.997718	3385
ICAM3	skepinone-L	-0.00847567	0.911205	3385
ICAM3	sorafenib	0.0157875	0.75355	3385
ICAM3	sotrastaurin	-0.18309	5.6325e-05	3385
ICAM3	spautin-1	-0.0035739	0.953305	3385
ICAM3	staurosporine	-0.0309045	0.853466	3385
ICAM3	sunitinib	-0.126795	0.00130036	3385
ICAM3	tacedinaline	-0.104999	0.0246579	3385
ICAM3	tacrolimus	-0.0264171	0.581875	3385
ICAM3	tamatinib	0.0696542	0.34856	3385
ICAM3	tamoxifen	-0.00913142	0.923859	3385
ICAM3	tandutinib	-0.030945	0.524791	3385
ICAM3	tanespimycin	-0.0490913	0.360971	3385
ICAM3	temozolomide	-0.0739603	0.220347	3385
ICAM3	temsirolimus	-0.0806652	0.200904	3385
ICAM3	teniposide	-0.163931	0.00210277	3385
ICAM3	thalidomide	0.0948525	0.555008	3385
ICAM3	tigecycline	-0.174145	0.00240028	3385
ICAM3	tipifarnib-P1	-0.0561861	0.165492	3385
ICAM3	tipifarnib-P2	-0.167924	0.0017146	3385
ICAM3	tivantinib	0.0216718	0.73694	3385
ICAM3	tivozanib	-0.00434164	0.945186	3385
ICAM3	topotecan	-0.0962564	0.0113746	3385
ICAM3	tosedostat	-0.0255071	0.594567	3385
ICAM3	tozasertib	0.0285909	0.895942	3385
ICAM3	trametinib	-0.139963	0.0401098	3385
ICAM3	tretinoin	-0.0643964	0.126751	3385
ICAM3	triazolothiadiazine	-0.0893276	0.0180931	3385
ICAM3	trifluoperazine	-0.0367644	0.512862	3385
ICAM3	triptolide	-0.132135	0.00065944	3385
ICAM3	tubastatin A	-0.124643	0.0371176	3385
ICAM3	valdecoxib	-0.119169	0.00275159	3385
ICAM3	vandetanib	0.0426088	0.428378	3385
ICAM3	veliparib	-2.5572e-05	0.999899	3385
ICAM3	vemurafenib	0.011359	0.87333	3385
ICAM3	vincristine	-0.0736546	0.0501224	3385
ICAM3	vorapaxar	-0.0391198	0.436309	3385
ICAM3	vorinostat	-0.0959336	0.0133627	3385
ICAM3	zebularine	-0.104858	0.00792556	3385
ITGA2	16-beta-bromoandrosterone	0.163703	0.000267631	3673
ITGA2	1S,3R-RSL-3	0.276286	1.76531e-13	3673
ITGA2	3-Cl-AHPC	0.26177	1.453e-12	3673
ITGA2	968	0.0774896	0.973489	3673
ITGA2	A-804598	0.0229349	0.910249	3673
ITGA2	AA-COCF3	0.199074	8.58225e-07	3673
ITGA2	ABT-199	0.280403	4.76796e-08	3673
ITGA2	ABT-737	0.258204	2.199e-10	3673
ITGA2	AC55649	0.0159241	0.924646	3673
ITGA2	AGK-2	0.0420004	0.907162	3673
ITGA2	AM-580	0.162587	0.000442877	3673
ITGA2	AT-406	0.0719059	0.473102	3673
ITGA2	AT13387	0.217818	0.000120777	3673
ITGA2	AT7867	0.310995	1.98901e-16	3673
ITGA2	AZ-3146	0.227863	5.44078e-09	3673
ITGA2	AZD1480	0.298597	1.18576e-06	3673
ITGA2	AZD4547	0.265866	6.77223e-11	3673
ITGA2	AZD6482	0.118353	0.0156277	3673
ITGA2	AZD7545	0.184069	5.96506e-06	3673
ITGA2	AZD7762	0.268657	2.76254e-13	3673
ITGA2	AZD8055	0.234316	1.58399e-09	3673
ITGA2	B02	0.319847	5.87244e-17	3673
ITGA2	BCL-LZH-4	-0.0648195	0.743784	3673
ITGA2	BEC	-0.00463978	0.999979	3673
ITGA2	BI-2536	0.452269	3.94367e-39	3673
ITGA2	BIBR-1532	0.209292	6.29097e-07	3673
ITGA2	BIRB-796	0.266119	2.07861e-10	3673
ITGA2	BIX-01294	0.369365	4.48389e-24	3673
ITGA2	BMS-195614	0.10215	0.0669248	3673
ITGA2	BMS-270394	0.237794	1.05402e-08	3673
ITGA2	BMS-345541	0.309613	1.49106e-16	3673
ITGA2	BMS-536924	0.0327079	0.579482	3673
ITGA2	BMS-754807	0.112818	0.00762365	3673
ITGA2	BRD-A02303741	0.139755	0.00435607	3673
ITGA2	BRD-A05715709	-0.0930029	0.519301	3673
ITGA2	BRD-A71883111	0.169576	2.9231e-05	3673
ITGA2	BRD-A86708339	0.24793	1.3295e-05	3673
ITGA2	BRD-A94377914	0.410377	9.29217e-16	3673
ITGA2	BRD-K01737880	0.299012	0.0863992	3673
ITGA2	BRD-K02251932	0.186412	5.436e-05	3673
ITGA2	BRD-K02492147	-0.11908	0.0300653	3673
ITGA2	BRD-K04800985	0.0531863	0.99881	3673
ITGA2	BRD-K09344309	-0.0295343	0.973761	3673
ITGA2	BRD-K09587429	-0.0841597	0.167584	3673
ITGA2	BRD-K11533227	0.235499	1.06472e-08	3673
ITGA2	BRD-K13999467	0.261472	1.08574e-10	3673
ITGA2	BRD-K14844214	0.167106	0.00644458	3673
ITGA2	BRD-K16147474	-0.0406628	0.91962	3673
ITGA2	BRD-K17060750	-0.123408	0.00780121	3673
ITGA2	BRD-K19103580	0.144387	0.00138421	3673
ITGA2	BRD-K24690302	0.251817	1.90072e-10	3673
ITGA2	BRD-K26531177	0.362364	3.15802e-21	3673
ITGA2	BRD-K27224038	0.149872	0.466735	3673
ITGA2	BRD-K27986637	0.156739	0.252362	3673
ITGA2	BRD-K28456706	0.268717	6.4059e-12	3673
ITGA2	BRD-K29086754	0.181382	0.242225	3673
ITGA2	BRD-K29313308	0.190404	2.25799e-06	3673
ITGA2	BRD-K30019337	0.146308	0.505324	3673
ITGA2	BRD-K30748066	0.427455	0.00683978	3673
ITGA2	BRD-K33199242	0.0534792	0.948158	3673
ITGA2	BRD-K33514849	0.176749	0.999288	3673
ITGA2	BRD-K34099515	0.0856258	0.90378	3673
ITGA2	BRD-K34222889	0.396344	1.30242e-28	3673
ITGA2	BRD-K34485477	0.0629333	0.998562	3673
ITGA2	BRD-K35604418	0.332193	9.32144e-19	3673
ITGA2	BRD-K37390332	0.0741461	0.634163	3673
ITGA2	BRD-K41334119	0.0533172	0.93834	3673
ITGA2	BRD-K41597374	0.281691	9.83743e-14	3673
ITGA2	BRD-K42260513	0.0105953	0.998533	3673
ITGA2	BRD-K44224150	0.0269661	0.994574	3673
ITGA2	BRD-K45681478	0.250854	9.51849e-10	3673
ITGA2	BRD-K48334597	0.313625	0.00241224	3673
ITGA2	BRD-K48477130	0.0188964	0.934402	3673
ITGA2	BRD-K49290616	-0.0477359	0.920189	3673
ITGA2	BRD-K50799972	0.0672678	0.313579	3673
ITGA2	BRD-K51490254	0.29325	5.71669e-13	3673
ITGA2	BRD-K51831558	0.195694	0.00337319	3673
ITGA2	BRD-K52037352	0.0793626	0.194641	3673
ITGA2	BRD-K55116708	0.165526	7.8507e-05	3673
ITGA2	BRD-K61166597	0.316815	7.56404e-17	3673
ITGA2	BRD-K63431240	0.0919186	0.0292014	3673
ITGA2	BRD-K64610608	-0.0205562	0.881329	3673
ITGA2	BRD-K66453893	0.386952	4.68694e-27	3673
ITGA2	BRD-K66532283	0.299993	4.54927e-15	3673
ITGA2	BRD-K70511574	0.390938	1.13426e-27	3673
ITGA2	BRD-K71781559	0.0126385	0.996572	3673
ITGA2	BRD-K75293299	0.00291044	0.994155	3673
ITGA2	BRD-K78574327	-0.00366636	0.997317	3673
ITGA2	BRD-K80183349	0.311792	6.65865e-17	3673
ITGA2	BRD-K84807411	0.149135	0.514437	3673
ITGA2	BRD-K85133207	0.206004	8.50827e-07	3673
ITGA2	BRD-K86535717	-0.0815366	0.796209	3673
ITGA2	BRD-K88742110	0.244653	5.52222e-10	3673
ITGA2	BRD-K90370028	0.0283991	0.9553	3673
ITGA2	BRD-K92856060	0.325007	3.7348e-17	3673
ITGA2	BRD-K96431673	-0.0182611	0.996572	3673
ITGA2	BRD-K96970199	0.0448908	0.998764	3673
ITGA2	BRD-K97651142	0.216896	4.7439e-08	3673
ITGA2	BRD-K99006945	0.0244671	0.764223	3673
ITGA2	BRD-M00053801	0.111075	0.196383	3673
ITGA2	BRD1378	0.0524075	0.616606	3673
ITGA2	BRD1812	0.305196	5.8254e-16	3673
ITGA2	BRD1835	0.149072	0.000838338	3673
ITGA2	BRD4132	0.0761592	0.207749	3673
ITGA2	BRD5468	0.0442724	0.620252	3673
ITGA2	BRD6340	0.246129	1.52285e-10	3673
ITGA2	BRD8899	-0.0151216	0.910363	3673
ITGA2	BRD8958	0.0159399	0.983739	3673
ITGA2	BRD9647	0.177272	8.2289e-05	3673
ITGA2	BRD9876	0.121169	0.0296239	3673
ITGA2	BYL-719	-0.00896148	0.923766	3673
ITGA2	Bax channel blocker	0.246137	2.09634e-09	3673
ITGA2	C6-ceramide	-0.0475408	0.673571	3673
ITGA2	CAL-101	0.0904448	0.0866447	3673
ITGA2	CAY10576	-0.0327088	0.67924	3673
ITGA2	CAY10594	0.135166	0.00993039	3673
ITGA2	CAY10618	0.264209	1.1401e-12	3673
ITGA2	CBB-1007	-0.0159854	0.950725	3673
ITGA2	CCT036477	0.407828	2.32067e-29	3673
ITGA2	CD-1530	0.165793	0.00094646	3673
ITGA2	CD-437	0.330581	9.93796e-20	3673
ITGA2	CHIR-99021	0.147295	0.000261357	3673
ITGA2	CHM-1	0.358813	1.70108e-23	3673
ITGA2	CI-976	0.00163215	0.994308	3673
ITGA2	CID-5951923	-0.0468615	0.590872	3673
ITGA2	CIL41	0.212773	0.00076249	3673
ITGA2	CIL55	0.158407	0.427151	3673
ITGA2	CIL55A	0.314437	4.20697e-08	3673
ITGA2	CIL56	0.283086	5.42224e-07	3673
ITGA2	CIL70	0.402176	2.66626e-14	3673
ITGA2	COL-3	0.295477	1.23831e-11	3673
ITGA2	CR-1-31B	0.336188	6.03208e-21	3673
ITGA2	Ch-55	0.186482	1.1358e-05	3673
ITGA2	Compound 1541A	0.157265	0.00284685	3673
ITGA2	Compound 23 citrate	0.268999	9.69599e-13	3673
ITGA2	Compound 7d-cis	0.310532	1.52866e-14	3673
ITGA2	DBeQ	0.307927	6.28703e-15	3673
ITGA2	DNMDP	0.00645649	0.947856	3673
ITGA2	ELCPK	0.389196	1.24554e-12	3673
ITGA2	ETP-46464	0.226636	3.55978e-06	3673
ITGA2	EX-527	0.074795	0.466618	3673
ITGA2	FGIN-1-27	-0.118619	0.322784	3673
ITGA2	FQI-1	0.363253	1.71442e-12	3673
ITGA2	FQI-2	0.381121	6.79029e-27	3673
ITGA2	FSC231	-0.0466871	0.99945	3673
ITGA2	GANT-61	0.132269	0.0106204	3673
ITGA2	GDC-0879	-0.0820595	0.101698	3673
ITGA2	GDC-0941	0.131274	0.00183503	3673
ITGA2	GMX-1778	0.272001	9.20689e-13	3673
ITGA2	GSK-3 inhibitor IX	0.243108	1.77999e-09	3673
ITGA2	GSK-J4	0.426284	0.0025019	3673
ITGA2	GSK1059615	-0.0102725	0.980397	3673
ITGA2	GSK2636771	-0.000954762	0.99545	3673
ITGA2	GSK4112	0.16244	0.000219671	3673
ITGA2	GSK461364	0.43189	5.59156e-34	3673
ITGA2	GSK525762A	0.328841	1.02846e-19	3673
ITGA2	GW-405833	0.312754	1.75636e-17	3673
ITGA2	GW-843682X	0.279915	3.51317e-13	3673
ITGA2	HBX-41108	0.236929	1.57273e-06	3673
ITGA2	HC-067047	0.0847424	0.130616	3673
ITGA2	HLI 373	0.243724	4.09702e-10	3673
ITGA2	I-BET151	0.364598	1.65594e-24	3673
ITGA2	IC-87114	-0.0112947	0.906231	3673
ITGA2	IPR-456	0.0493728	0.719482	3673
ITGA2	ISOX	0.368443	2.01832e-24	3673
ITGA2	IU1	0.0986054	0.216878	3673
ITGA2	JQ-1	0.346776	5.74633e-22	3673
ITGA2	JW-480	0.0694738	0.692388	3673
ITGA2	JW-55	-0.166334	0.163735	3673
ITGA2	JW-74	0.0800266	0.319496	3673
ITGA2	KH-CB19	0.0023433	0.987187	3673
ITGA2	KHS101	0.192627	1.75364e-06	3673
ITGA2	KPT185	0.338161	1.624e-15	3673
ITGA2	KU 0060648	0.23271	1.27281e-09	3673
ITGA2	KU-0063794	0.228859	7.21483e-09	3673
ITGA2	KU-55933	0.214176	1.65829e-07	3673
ITGA2	KU-60019	0.276505	1.54827e-13	3673
ITGA2	KW-2449	0.390528	8.86478e-28	3673
ITGA2	KX2-391	0.420222	5.87399e-32	3673
ITGA2	Ki8751	0.276265	5.34358e-12	3673
ITGA2	Ko-143	0.321867	2.0816e-17	3673
ITGA2	L-685458	0.0139717	0.857153	3673
ITGA2	LE-135	0.162671	9.5034e-05	3673
ITGA2	LRRK2-IN-1	0.406437	1.52377e-21	3673
ITGA2	LY-2157299	-0.0582181	0.821575	3673
ITGA2	LY-2183240	0.458625	2.4416e-39	3673
ITGA2	MG-132	0.212581	0.00372825	3673
ITGA2	MGCD-265	0.325118	2.98722e-18	3673
ITGA2	MI-1	-0.0761506	0.308743	3673
ITGA2	MI-2	0.220987	0.000367958	3673
ITGA2	MK-0752	-0.101767	0.153993	3673
ITGA2	MK-1775	0.347868	3.47233e-21	3673
ITGA2	MK-2206	0.235889	5.80024e-09	3673
ITGA2	ML006	0.0859107	0.092697	3673
ITGA2	ML029	0.22752	2.59016e-08	3673
ITGA2	ML031	0.307236	6.63399e-14	3673
ITGA2	ML050	0.288357	4.02936e-13	3673
ITGA2	ML083	-0.0566302	0.620739	3673
ITGA2	ML162	0.261051	7.42782e-12	3673
ITGA2	ML203	0.132877	0.00878285	3673
ITGA2	ML210	0.309848	3.04297e-16	3673
ITGA2	ML239	0.272524	1.71186e-12	3673
ITGA2	ML258	0.0274041	0.814198	3673
ITGA2	ML311	0.377546	1.84825e-26	3673
ITGA2	ML312	-0.136132	0.95729	3673
ITGA2	ML320	0.0942436	0.0340841	3673
ITGA2	ML334 diastereomer	-0.083426	0.21351	3673
ITGA2	MLN2238	0.237753	3.01666e-10	3673
ITGA2	MLN2480	0.117964	0.170721	3673
ITGA2	MST-312	0.303861	2.52072e-16	3673
ITGA2	Mdivi-1	0.205306	2.30127e-07	3673
ITGA2	Merck60	0.318058	1.79767e-18	3673
ITGA2	N9-isopropylolomoucine	0.214805	4.24331e-08	3673
ITGA2	NPC-26	0.0665439	0.506465	3673
ITGA2	NSC 74859	0.131636	0.00569811	3673
ITGA2	NSC19630	0.319296	1.04812e-12	3673
ITGA2	NSC23766	0.251122	6.6272e-11	3673
ITGA2	NSC30930	-0.0827026	0.205398	3673
ITGA2	NSC48300	0.34299	6.43232e-21	3673
ITGA2	NSC632839	0.324855	5.2287e-19	3673
ITGA2	NSC95397	0.4171	7.72815e-28	3673
ITGA2	NVP-231	0.318704	3.8171e-18	3673
ITGA2	NVP-ADW742	0.186389	4.78442e-06	3673
ITGA2	NVP-BEZ235	0.227049	1.53648e-06	3673
ITGA2	NVP-BSK805	0.322456	8.10603e-18	3673
ITGA2	NVP-TAE684	0.115363	0.00842936	3673
ITGA2	O-6-benzylguanine	0.0979414	0.398256	3673
ITGA2	OSI-027	0.205782	2.41293e-07	3673
ITGA2	OSI-930	0.287688	3.73365e-12	3673
ITGA2	PAC-1	0.303967	7.71458e-16	3673
ITGA2	PD 153035	-0.16513	0.00102476	3673
ITGA2	PD318088	-0.238343	2.5225e-09	3673
ITGA2	PDMP	0.216166	6.71221e-08	3673
ITGA2	PF-184	0.348287	5.72975e-21	3673
ITGA2	PF-3758309	0.34199	1.23751e-10	3673
ITGA2	PF-4800567 hydrochloride	0.0242808	0.999586	3673
ITGA2	PF-543	0.109499	0.0137178	3673
ITGA2	PF-573228	0.272161	3.55425e-13	3673
ITGA2	PF-750	0.224473	3.55703e-07	3673
ITGA2	PHA-793887	0.332857	2.27238e-20	3673
ITGA2	PI-103	0.321053	2.86656e-17	3673
ITGA2	PIK-93	0.22259	1.44122e-08	3673
ITGA2	PL-DI	0.42429	2.2251e-32	3673
ITGA2	PLX-4720	0.00509873	0.963201	3673
ITGA2	PRIMA-1	0.443685	5.25628e-34	3673
ITGA2	PRIMA-1-Met	0.221747	0.000406816	3673
ITGA2	PRL-3 inhibitor I	0.00375083	0.983335	3673
ITGA2	PX-12	0.493091	4.93538e-45	3673
ITGA2	PYR-41	0.178965	0.000260729	3673
ITGA2	QS-11	0.0966352	0.689355	3673
ITGA2	QW-BI-011	0.443823	3.09816e-08	3673
ITGA2	R428	0.272281	6.7061e-09	3673
ITGA2	RAF265	0.121837	0.0158177	3673
ITGA2	RG-108	0.245838	1.76398e-09	3673
ITGA2	RITA	0.352601	2.25226e-20	3673
ITGA2	RO4929097	0.0913645	0.222578	3673
ITGA2	Repligen 136	0.269351	1.58558e-11	3673
ITGA2	SB-225002	0.425886	3.2669e-34	3673
ITGA2	SB-431542	-0.00158267	0.993375	3673
ITGA2	SB-525334	0.112993	0.0141292	3673
ITGA2	SB-743921	0.392094	6.66791e-29	3673
ITGA2	SCH-529074	0.180076	2.7513e-05	3673
ITGA2	SCH-79797	0.269176	3.657e-13	3673
ITGA2	SGX-523	-0.0582844	0.315414	3673
ITGA2	SID 26681509	0.257856	6.49239e-10	3673
ITGA2	SJ-172550	0.050978	0.636188	3673
ITGA2	SKI-II	0.251893	6.36711e-10	3673
ITGA2	SMER-3	0.289985	5.07511e-12	3673
ITGA2	SN-38	0.280723	8.29116e-12	3673
ITGA2	SNS-032	0.225325	1.2285e-08	3673
ITGA2	SNX-2112	0.218297	2.5806e-09	3673
ITGA2	SR-II-138A	0.33919	1.03886e-21	3673
ITGA2	SR1001	0.116762	0.0577401	3673
ITGA2	SR8278	0.0402082	0.924392	3673
ITGA2	SRT-1720	0.251788	1.30233e-09	3673
ITGA2	STF-31	0.308635	3.14156e-16	3673
ITGA2	SU11274	0.266153	4.81947e-12	3673
ITGA2	SZ4TA2	-0.00101562	0.994707	3673
ITGA2	StemRegenin 1	0.201186	1.85732e-07	3673
ITGA2	TG-100-115	0.171881	0.000139236	3673
ITGA2	TG-101348	0.287199	3.64216e-14	3673
ITGA2	TGX-221	0.0989503	0.0943867	3673
ITGA2	TPCA-1	0.237773	2.04798e-10	3673
ITGA2	TW-37	0.269414	3.05179e-12	3673
ITGA2	UNC0321	0.00104871	0.996166	3673
ITGA2	UNC0638	0.256678	6.708e-11	3673
ITGA2	VAF-347	-0.183849	0.00130757	3673
ITGA2	VER-155008	0.108986	0.00798455	3673
ITGA2	VU0155056	0.00165358	0.997184	3673
ITGA2	WAY-362450	-0.0107069	0.998521	3673
ITGA2	WP1130	0.297779	4.21526e-15	3673
ITGA2	WZ4002	0.06848	0.319702	3673
ITGA2	WZ8040	0.0737941	0.142071	3673
ITGA2	XL765	0.137005	0.00615283	3673
ITGA2	YK 4-279	0.379904	1.68771e-26	3673
ITGA2	YM-155	0.178931	4.7272e-05	3673
ITGA2	ZSTK474	0.161746	0.000913081	3673
ITGA2	abiraterone	-0.189527	0.108636	3673
ITGA2	afatinib	-0.11496	0.00939477	3673
ITGA2	alisertib	0.302014	2.38032e-16	3673
ITGA2	alvocidib	0.315247	9.16221e-09	3673
ITGA2	apicidin	0.360595	5.34952e-24	3673
ITGA2	austocystin D	-0.147835	0.000641437	3673
ITGA2	avicin D	0.05763	0.539908	3673
ITGA2	avrainvillamide	0.301593	2.07006e-11	3673
ITGA2	axitinib	0.398923	1.45411e-28	3673
ITGA2	azacitidine	0.104949	0.0228103	3673
ITGA2	bafilomycin A1	0.0590708	0.932355	3673
ITGA2	barasertib	0.283791	2.10212e-14	3673
ITGA2	bardoxolone methyl	0.334851	3.01447e-17	3673
ITGA2	belinostat	0.39131	4.39753e-14	3673
ITGA2	bendamustine	0.268912	4.12106e-11	3673
ITGA2	betulinic acid	-0.073953	0.608201	3673
ITGA2	bexarotene	0.212881	2.79738e-07	3673
ITGA2	birinapant	-0.0628743	0.309998	3673
ITGA2	blebbistatin	-0.0776287	0.902748	3673
ITGA2	bleomycin A2	-0.0241736	0.708301	3673
ITGA2	bortezomib	0.28823	2.43014e-14	3673
ITGA2	bosutinib	0.0879442	0.0318592	3673
ITGA2	brefeldin A	0.171214	4.2735e-05	3673
ITGA2	brivanib	0.260766	2.46439e-11	3673
ITGA2	cabozantinib	0.132424	0.00272734	3673
ITGA2	canertinib	0.00848084	0.884387	3673
ITGA2	cediranib	0.180906	0.0440758	3673
ITGA2	ceranib-2	0.386668	8.17184e-28	3673
ITGA2	cerulenin	0.34452	4.65775e-21	3673
ITGA2	chlorambucil	0.34839	2.64164e-21	3673
ITGA2	ciclopirox	0.377936	1.9477e-26	3673
ITGA2	ciclosporin	0.129433	0.00839684	3673
ITGA2	cimetidine	0.0751765	0.947996	3673
ITGA2	clofarabine	0.346635	2.55347e-22	3673
ITGA2	crizotinib	0.296866	1.07378e-15	3673
ITGA2	cucurbitacin I	0.320384	2.73076e-17	3673
ITGA2	curcumin	0.297655	6.83395e-16	3673
ITGA2	cyanoquinoline 11	0.0957401	0.243324	3673
ITGA2	cyclophosphamide	-0.0566994	0.993392	3673
ITGA2	cytarabine hydrochloride	0.416982	3.22584e-32	3673
ITGA2	cytochalasin B	0.052748	0.315714	3673
ITGA2	dabrafenib	0.111777	0.115967	3673
ITGA2	dacarbazine	0.246551	5.10234e-11	3673
ITGA2	daporinad	0.265892	1.0042e-10	3673
ITGA2	darinaparsin	0.314528	9.33984e-08	3673
ITGA2	dasatinib	-0.165378	5.2295e-05	3673
ITGA2	decitabine	0.306727	1.89e-17	3673
ITGA2	dexamethasone	0.218869	8.56741e-08	3673
ITGA2	dinaciclib	0.371354	2.40889e-12	3673
ITGA2	docetaxel	0.320344	8.28394e-09	3673
ITGA2	doxorubicin	0.40099	2.6759e-30	3673
ITGA2	elocalcitol	0.288173	1.57057e-14	3673
ITGA2	entinostat	0.322374	1.71338e-18	3673
ITGA2	epigallocatechin-3-monogallate	0.23022	3.40547e-08	3673
ITGA2	erastin	0.188658	1.98609e-06	3673
ITGA2	erismodegib	-0.0882071	0.192922	3673
ITGA2	erlotinib	-0.193558	1.00791e-06	3673
ITGA2	etomoxir	0.0128389	0.983893	3673
ITGA2	etoposide	0.397277	7.3289e-29	3673
ITGA2	fingolimod	0.258144	9.29014e-12	3673
ITGA2	fluorouracil	0.177929	2.69193e-06	3673
ITGA2	fluvastatin	0.075926	0.131212	3673
ITGA2	foretinib	0.231962	3.2869e-09	3673
ITGA2	fulvestrant	0.189275	0.526645	3673
ITGA2	fumonisin B1	0.0900799	0.082101	3673
ITGA2	gefitinib	-0.087735	0.0639606	3673
ITGA2	gemcitabine	0.356519	3.37992e-21	3673
ITGA2	gossypol	0.328351	6.40966e-18	3673
ITGA2	hyperforin	-0.00522673	0.97256	3673
ITGA2	ibrutinib	-0.0168856	0.810847	3673
ITGA2	ifosfamide	-0.0781928	0.66487	3673
ITGA2	imatinib	0.217159	7.64107e-08	3673
ITGA2	importazole	0.0899111	0.114782	3673
ITGA2	indisulam	0.335024	2.97313e-19	3673
ITGA2	isoevodiamine	0.391622	5.8203e-28	3673
ITGA2	isoliquiritigenin	0.4482	1.8878e-08	3673
ITGA2	isonicotinohydroxamic acid	0.041303	0.99255	3673
ITGA2	istradefylline	0.0473013	0.784721	3673
ITGA2	itraconazole	0.102658	0.0957566	3673
ITGA2	lapatinib	-0.0125824	0.811364	3673
ITGA2	lenvatinib	0.297541	3.17694e-14	3673
ITGA2	leptomycin B	0.276983	1.21311e-14	3673
ITGA2	linifanib	0.202808	6.64338e-08	3673
ITGA2	linsitinib	0.161773	7.1225e-05	3673
ITGA2	lomeguatrib	0.118807	0.0201739	3673
ITGA2	lovastatin	-0.000473951	0.994063	3673
ITGA2	manumycin A	0.41004	1.99887e-30	3673
ITGA2	marinopyrrole A	0.36029	2.68769e-14	3673
ITGA2	masitinib	0.253061	8.82646e-11	3673
ITGA2	methotrexate	0.171925	1.8046e-05	3673
ITGA2	methylstat	0.3781	1.18418e-17	3673
ITGA2	mitomycin	0.358991	3.54513e-23	3673
ITGA2	momelotinib	0.286045	1.88139e-13	3673
ITGA2	myricetin	0.0338489	0.773495	3673
ITGA2	myriocin	-0.100784	0.842624	3673
ITGA2	nakiterpiosin	0.350121	4.58796e-22	3673
ITGA2	narciclasine	0.368629	4.57156e-24	3673
ITGA2	navitoclax	0.209628	9.85731e-08	3673
ITGA2	necrostatin-1	0.180487	3.7535e-05	3673
ITGA2	necrostatin-7	0.142113	0.000799824	3673
ITGA2	necrosulfonamide	0.440744	2.39201e-24	3673
ITGA2	nelarabine	0.0195259	0.953826	3673
ITGA2	neopeltolide	0.24138	0.0049125	3673
ITGA2	neratinib	0.00568139	0.919938	3673
ITGA2	neuronal differentiation inducer III	0.2951	1.14584e-15	3673
ITGA2	niclosamide	0.230002	7.04543e-09	3673
ITGA2	nilotinib	0.107749	0.128913	3673
ITGA2	nintedanib	0.195434	3.0515e-05	3673
ITGA2	nutlin-3	0.31059	1.79844e-16	3673
ITGA2	obatoclax	0.280824	2.59248e-14	3673
ITGA2	olaparib	0.291516	6.84454e-15	3673
ITGA2	oligomycin A	0.280461	2.05302e-13	3673
ITGA2	omacetaxine mepesuccinate	0.387721	9.38795e-20	3673
ITGA2	ouabain	0.365222	5.58095e-24	3673
ITGA2	paclitaxel	0.325698	6.27149e-19	3673
ITGA2	palmostatin B	0.100195	0.3007	3673
ITGA2	pandacostat	0.146654	0.00127914	3673
ITGA2	panobinostat	0.408538	4.1631e-31	3673
ITGA2	parbendazole	0.418122	5.32885e-33	3673
ITGA2	parthenolide	0.167359	0.000925628	3673
ITGA2	pazopanib	0.32373	6.17323e-18	3673
ITGA2	pevonedistat	0.252161	3.3322e-11	3673
ITGA2	phloretin	0.359855	2.92496e-22	3673
ITGA2	pifithrin-alpha	0.119595	0.0230767	3673
ITGA2	pifithrin-mu	0.320855	1.0068e-17	3673
ITGA2	piperlongumine	0.403079	6.9395e-30	3673
ITGA2	pitstop2	0.12133	0.42066	3673
ITGA2	pluripotin	0.0197145	0.737733	3673
ITGA2	procarbazine	-0.0514692	0.757324	3673
ITGA2	prochlorperazine	0.170137	4.1689e-05	3673
ITGA2	purmorphamine	0.194171	1.5616e-05	3673
ITGA2	pyrazolanthrone	0.0658275	0.179215	3673
ITGA2	quizartinib	0.132686	0.0109786	3673
ITGA2	regorafenib	0.171061	0.000192079	3673
ITGA2	rigosertib	0.37358	2.12115e-24	3673
ITGA2	ruxolitinib	0.164828	3.1549e-05	3673
ITGA2	salermide	0.0567152	0.555388	3673
ITGA2	saracatinib	-0.196921	1.24036e-06	3673
ITGA2	selumetinib	-0.237118	7.19116e-09	3673
ITGA2	semagacestat	-0.0719999	0.537637	3673
ITGA2	serdemetan	0.397349	2.83303e-26	3673
ITGA2	sildenafil	0.0195079	0.897898	3673
ITGA2	silmitasertib	0.0756182	0.335417	3673
ITGA2	simvastatin	-0.0522277	0.377168	3673
ITGA2	sirolimus	0.300241	1.37718e-15	3673
ITGA2	sitagliptin	-0.0880152	0.997718	3673
ITGA2	skepinone-L	0.249928	2.0185e-05	3673
ITGA2	sorafenib	0.195787	1.81533e-06	3673
ITGA2	sotrastaurin	0.359024	2.25675e-16	3673
ITGA2	spautin-1	0.092809	0.0479042	3673
ITGA2	staurosporine	0.234315	0.0148203	3673
ITGA2	sunitinib	0.264878	3.15537e-12	3673
ITGA2	tacedinaline	0.340078	5.64397e-15	3673
ITGA2	tacrolimus	0.272043	1.13024e-11	3673
ITGA2	tamatinib	0.0423878	0.615519	3673
ITGA2	tamoxifen	0.0910896	0.117416	3673
ITGA2	tandutinib	0.232125	8.16434e-09	3673
ITGA2	tanespimycin	-0.0430649	0.430164	3673
ITGA2	temozolomide	0.106827	0.0696743	3673
ITGA2	temsirolimus	0.265425	2.88154e-06	3673
ITGA2	teniposide	0.419545	5.06135e-17	3673
ITGA2	thalidomide	0.0447878	0.839013	3673
ITGA2	tigecycline	0.28368	5.75835e-07	3673
ITGA2	tipifarnib-P1	0.287113	2.74613e-14	3673
ITGA2	tipifarnib-P2	0.344393	1.73246e-11	3673
ITGA2	tivantinib	0.384673	2.67878e-13	3673
ITGA2	tivozanib	0.193753	1.0395e-05	3673
ITGA2	topotecan	0.35958	4.58439e-24	3673
ITGA2	tosedostat	0.126994	0.0020901	3673
ITGA2	tozasertib	0.400747	0.00697395	3673
ITGA2	trametinib	-0.291398	1.87508e-06	3673
ITGA2	tretinoin	0.280283	4.03447e-13	3673
ITGA2	triazolothiadiazine	0.441089	5.19956e-37	3673
ITGA2	trifluoperazine	0.114694	0.0138821	3673
ITGA2	triptolide	0.300691	9.54421e-16	3673
ITGA2	tubastatin A	0.301711	9.09836e-08	3673
ITGA2	valdecoxib	0.309085	6.70556e-16	3673
ITGA2	vandetanib	-0.133769	0.00299588	3673
ITGA2	veliparib	0.0754089	0.290995	3673
ITGA2	vemurafenib	-0.015955	0.816539	3673
ITGA2	vincristine	0.445121	1.39382e-38	3673
ITGA2	vorapaxar	0.213995	9.93311e-07	3673
ITGA2	vorinostat	0.373198	4.98912e-25	3673
ITGA2	zebularine	0.187639	1.07271e-06	3673
LCP1	16-beta-bromoandrosterone	-0.0568359	0.244465	3936
LCP1	1S,3R-RSL-3	-0.123663	0.0016792	3936
LCP1	3-Cl-AHPC	-0.211951	1.3524e-08	3936
LCP1	968	-0.0466205	0.981375	3936
LCP1	A-804598	0.0919957	0.476815	3936
LCP1	AA-COCF3	-0.212581	1.52989e-07	3936
LCP1	ABT-199	-0.225341	1.2948e-05	3936
LCP1	ABT-737	-0.227074	2.76882e-08	3936
LCP1	AC55649	0.0220863	0.885648	3936
LCP1	AGK-2	0.00530761	0.992803	3936
LCP1	AM-580	-0.122582	0.00901971	3936
LCP1	AT-406	-0.104696	0.256683	3936
LCP1	AT13387	-0.271904	1.22294e-06	3936
LCP1	AT7867	-0.184104	2.17523e-06	3936
LCP1	AZ-3146	-0.149913	0.000175615	3936
LCP1	AZD1480	-0.0982875	0.161157	3936
LCP1	AZD4547	0.00806682	0.892602	3936
LCP1	AZD6482	-0.0982665	0.0539999	3936
LCP1	AZD7545	-0.15623	0.000136669	3936
LCP1	AZD7762	-0.288387	3.87732e-15	3936
LCP1	AZD8055	-0.178721	4.45533e-06	3936
LCP1	B02	-0.219041	1.62437e-08	3936
LCP1	BCL-LZH-4	-0.00685669	0.983712	3936
LCP1	BEC	-0.0280006	0.999979	3936
LCP1	BI-2536	-0.266211	1.3982e-13	3936
LCP1	BIBR-1532	-0.0929759	0.0354603	3936
LCP1	BIRB-796	-0.0995954	0.0238387	3936
LCP1	BIX-01294	-0.186708	8.48826e-07	3936
LCP1	BMS-195614	0.0341518	0.616172	3936
LCP1	BMS-270394	-0.116146	0.00702451	3936
LCP1	BMS-345541	-0.296593	2.93031e-15	3936
LCP1	BMS-536924	-0.0780102	0.121589	3936
LCP1	BMS-754807	0.0432665	0.370038	3936
LCP1	BRD-A02303741	-0.064533	0.226947	3936
LCP1	BRD-A05715709	0.0692418	0.63761	3936
LCP1	BRD-A71883111	-0.163913	5.6209e-05	3936
LCP1	BRD-A86708339	-0.272547	1.46537e-06	3936
LCP1	BRD-A94377914	-0.284849	5.65143e-08	3936
LCP1	BRD-K01737880	-0.265459	0.135085	3936
LCP1	BRD-K02251932	-0.0211548	0.721533	3936
LCP1	BRD-K02492147	0.105466	0.0566775	3936
LCP1	BRD-K04800985	-0.00475423	0.999785	3936
LCP1	BRD-K09344309	0.105107	0.818967	3936
LCP1	BRD-K09587429	0.0853871	0.160683	3936
LCP1	BRD-K11533227	-0.176841	2.0659e-05	3936
LCP1	BRD-K13999467	-0.101107	0.0159725	3936
LCP1	BRD-K14844214	0.00816473	0.935476	3936
LCP1	BRD-K16147474	0.0360278	0.925035	3936
LCP1	BRD-K17060750	0.130311	0.00480525	3936
LCP1	BRD-K19103580	-0.136149	0.00265909	3936
LCP1	BRD-K24690302	-0.137599	0.000733375	3936
LCP1	BRD-K26531177	-0.187988	2.03345e-06	3936
LCP1	BRD-K27224038	-0.100672	0.672276	3936
LCP1	BRD-K27986637	-0.103781	0.481672	3936
LCP1	BRD-K28456706	-0.144105	0.000334132	3936
LCP1	BRD-K29086754	-0.199893	0.180055	3936
LCP1	BRD-K29313308	-0.195983	1.09066e-06	3936
LCP1	BRD-K30019337	-0.00297232	0.996513	3936
LCP1	BRD-K30748066	-0.308573	0.0597708	3936
LCP1	BRD-K33199242	-0.0277355	0.965292	3936
LCP1	BRD-K33514849	-0.198923	0.999288	3936
LCP1	BRD-K34099515	0.122052	0.843996	3936
LCP1	BRD-K34222889	-0.210572	1.44359e-08	3936
LCP1	BRD-K34485477	-0.0299405	0.998562	3936
LCP1	BRD-K35604418	-0.17206	8.30576e-06	3936
LCP1	BRD-K37390332	0.0510903	0.785108	3936
LCP1	BRD-K41334119	-0.031341	0.96766	3936
LCP1	BRD-K41597374	-0.15966	3.8622e-05	3936
LCP1	BRD-K42260513	0.0434935	0.994633	3936
LCP1	BRD-K44224150	-0.099392	0.962786	3936
LCP1	BRD-K45681478	-0.113571	0.0081735	3936
LCP1	BRD-K48334597	-0.148721	0.155898	3936
LCP1	BRD-K48477130	-0.0366268	0.86675	3936
LCP1	BRD-K49290616	-0.101878	0.764748	3936
[truncated: 7,141 more rows]
